# Supplementary material for: Machine learning-assisted elucidation of CD81–CD44 interactions in promoting cancer stemness and extracellular vesicle integrity
Source: eLife journal article supplement (doi:10.7554/elife.82669), 2022-09-30

Figure 4- figure supplement 2

**A**

| Staining              | CD81 <sup>low</sup> | CD81 <sup>high</sup> | CD44 <sup>low</sup> | CD44 <sup>high</sup> |
|-----------------------|---------------------|----------------------|---------------------|----------------------|
| No. of patients       | 16                  | 61                   | 19                  | 56                   |
| Age (yr)              | 56.9±12.9           | 55±11.1              | 55.7 ±12.9          | 55.4 ± 8.6           |
| Known                 | 4                   | 13                   | 11                  | 7                    |
| Unknown               | 9                   | 44                   | 7                   | 43                   |
| Sex (No. of patients) |                     |                      |                     |                      |
| Female                | 4                   | 13                   | 11                  | 7                    |
| Male                  | 0                   | 0                    | 0                   | 0                    |
| Unknown               | 9                   | 44                   | 7                   | 43                   |
| Ethnicity             |                     |                      |                     |                      |
| White                 | 4                   | 10                   | 9                   | 6                    |
| Black                 | 0                   | 3                    | 2                   | 1                    |
| Unknown               | 9                   | 44                   | 7                   | 43                   |
| Tumor size            |                     |                      |                     |                      |
| T1 or 0               | 9                   | 28                   | 4                   | 32                   |
| T2                    | 2                   | 15                   | 7                   | 8                    |
| T3                    | 1                   | 8                    | 2                   | 7                    |
| T4                    | 1                   | 3                    | 3                   | 1                    |
| Unknown               | 0                   | 3                    | 2                   | 2                    |
| Tumor grade           |                     |                      |                     |                      |
| 1 or 0                | 3                   | 9                    | 2                   | 9                    |
| 2                     | 4                   | 9                    | 4                   | 9                    |
| 3                     | 6                   | 38                   | 11                  | 31                   |
| Unknown               | 0                   | 1                    | 1                   | 1                    |
| Tumor Stage           |                     |                      |                     |                      |
| 1                     | 2                   | 1                    | 2                   | 1                    |
| 2                     | 0                   | 2                    | 2                   | 0                    |
| 3                     | 2                   | 9                    | 6                   | 5                    |
| Unknown               | 9                   | 45                   | 8                   | 44                   |
| Subtype               |                     |                      |                     |                      |
| Luminal A             | 9                   | 23                   | 12                  | 19                   |
| Luminal B             | 4                   | 5                    | 2                   | 7                    |
| HER2                  | 0                   | 8                    | 0                   | 7                    |
| TNBC                  | 2                   | 25                   | 4                   | 23                   |
| Unknown               | 1                   | 0                    | 1                   | 0                    |

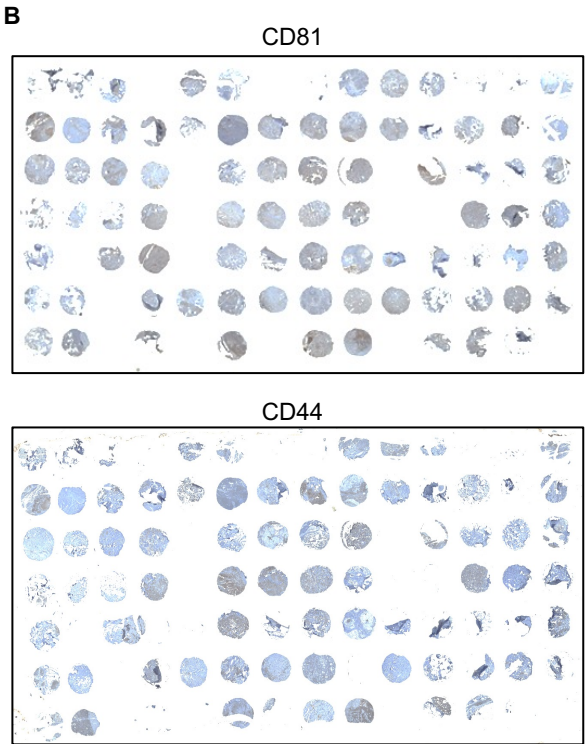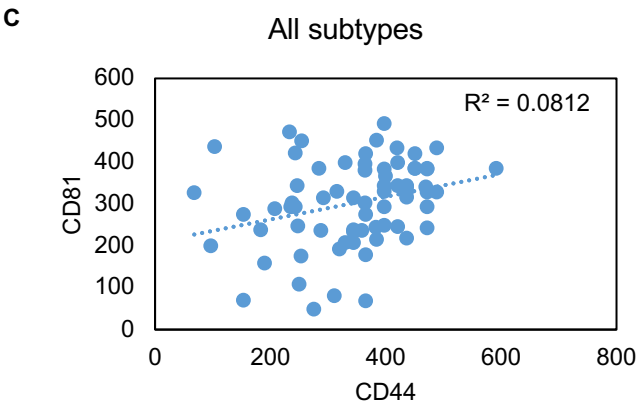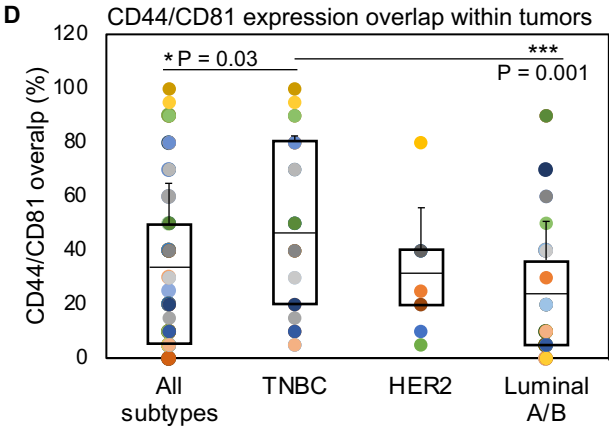

Supplement: supp [file elife_poa_e82669_Figure_4_figure_supplement_2.pdf › elife_poa_e82669_Figure_4_figure_supplement_2.pdf]
