# Supplementary material for: Machine learning-assisted elucidation of CD81–CD44 interactions in promoting cancer stemness and extracellular vesicle integrity
Source: PubMed Central journal article supplement (PMC9581534; doi:10.7554/elife.82669), 2022-10-04

Figure 1-source data 2  
 Uncropped blots associated with Figure 1H

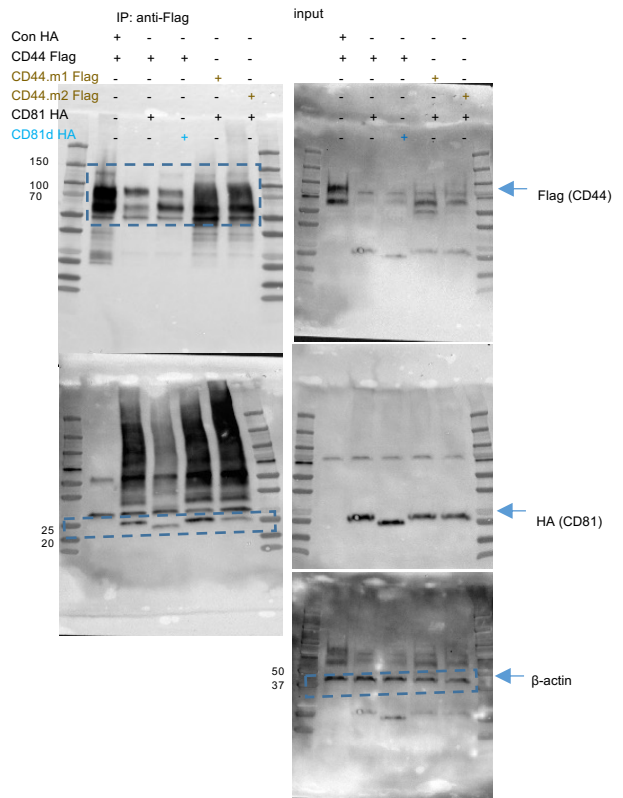

Supplement: elife-82669-fig1-data2.pdf [file elife-82669-fig1-data2.pdf]
