# Supplementary material for: Machine learning-assisted elucidation of CD81–CD44 interactions in promoting cancer stemness and extracellular vesicle integrity
Source: eLife journal article supplement (doi:10.7554/elife.82669), 2022-09-30

Figure 1-figure supplement 1-source data 3  
Uncropped blots associated with Figure 1-figure supplement 1D

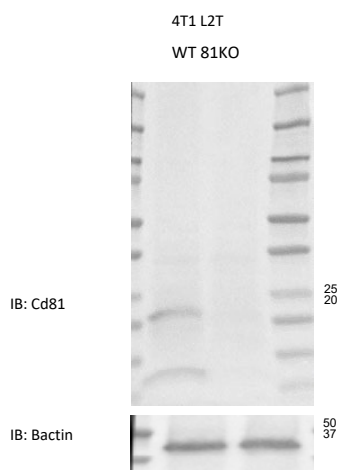

Supplement: fig1-figsupp1-data3 [file elife-82669-fig1-figsupp1-data3-v2.pdf]
