# Supplementary material for: Machine learning-assisted elucidation of CD81–CD44 interactions in promoting cancer stemness and extracellular vesicle integrity
Source: eLife. 2022 Oct 4;11:e82669. doi: 10.7554/eLife.82669 (PMC9581534; doi:10.7554/eLife.82669)
Supplement: Supplementary file 1. [file elife-82669-supp1.xlsx]

## Sheet: Sheet1
Supplementary file 1. Overlapping list of 38 proteins differentially expressed in CD44- cells (Table S1)
Identified Proteins	Accession Number	Molecular Weight	Control CD44	SiCD44	control/siCD44 ratio		CD44+	CD44-	CD44+/- ratio
Upregulated in CD44- cells
Sorting and assembly machinery component 50 homolog OS=Homo sapiens GN=SAMM50 PE=1 SV=3	SAM50_HUMAN	52 kDa	0	3	0		3	6	0.5
Downregulated in CD44- levels
CD81 antigen OS=Homo sapiens GN=CD81 PE=1 SV=1	CD81_HUMAN	26 kDa	4	2	2		2	0	#DIV/0!
Coatomer subunit beta OS=Homo sapiens GN=COPB1 PE=1 SV=3	COPB_HUMAN	107 kDa	6	2	3		2	0	#DIV/0!
Tyrosine-protein kinase CSK OS=Homo sapiens GN=CSK PE=1 SV=1	CSK_HUMAN	51 kDa	2	0	#DIV/0!		2	0	#DIV/0!
Cysteine and glycine-rich protein 1 OS=Homo sapiens GN=CSRP1 PE=1 SV=3	CSRP1_HUMAN	21 kDa	3	0	#DIV/0!		3	0	#DIV/0!
Sorbitol dehydrogenase OS=Homo sapiens GN=SORD PE=1 SV=4	DHSO_HUMAN	38 kDa	4	2	2		7	2	3.5
Eukaryotic translation initiation factor 3 subunit D OS=Homo sapiens GN=EIF3D PE=1 SV=1	EIF3D_HUMAN	64 kDa	5	0	#DIV/0!		2	0	#DIV/0!
Eukaryotic translation initiation factor 3 subunit L OS=Homo sapiens GN=EIF3L PE=1 SV=1	EIF3L_HUMAN	67 kDa	4	0	#DIV/0!		2	0	#DIV/0!
Protein FAM98B OS=Homo sapiens GN=FAM98B PE=1 SV=1	FA98B_HUMAN	37 kDa	2	0	#DIV/0!		2	0	#DIV/0!
LanC-like protein 1 OS=Homo sapiens GN=LANCL1 PE=1 SV=1	LANC1_HUMAN	45 kDa	2	0	#DIV/0!		3	0	#DIV/0!
La-related protein 1 OS=Homo sapiens GN=LARP1 PE=1 SV=2	LARP1_HUMAN	124 kDa	3	0	#DIV/0!		6	0	#DIV/0!
Eukaryotic translation elongation factor 1 epsilon-1 OS=Homo sapiens GN=EEF1E1 PE=1 SV=1	MCA3_HUMAN	20 kDa	2	0	#DIV/0!		2	0	#DIV/0!
Unconventional myosin-Ic OS=Homo sapiens GN=MYO1C PE=1 SV=4	MYO1C_HUMAN	122 kDa	3	0	#DIV/0!		2	0	#DIV/0!
Unconventional myosin-Id OS=Homo sapiens GN=MYO1D PE=1 SV=2	MYO1D_HUMAN	116 kDa	3	0	#DIV/0!		5	0	#DIV/0!
Nuclear cap-binding protein subunit 1 OS=Homo sapiens GN=NCBP1 PE=1 SV=1	NCBP1_HUMAN	92 kDa	5	2	2.5		2	0	#DIV/0!
5'(3')-deoxyribonucleotidase, cytosolic type OS=Homo sapiens GN=NT5C PE=1 SV=2	NT5C_HUMAN	23 kDa	2	0	#DIV/0!		2	0	#DIV/0!
5'-nucleotidase domain-containing protein 1 OS=Homo sapiens GN=NT5DC1 PE=1 SV=1	NT5D1_HUMAN	52 kDa	3	0	#DIV/0!		2	0	#DIV/0!
Serine/threonine-protein kinase PAK 2 OS=Homo sapiens GN=PAK2 PE=1 SV=3	PAK2_HUMAN	58 kDa	3	0	#DIV/0!		2	0	#DIV/0!
Pleiotropic regulator 1 OS=Homo sapiens GN=PLRG1 PE=1 SV=1	PLRG1_HUMAN	57 kDa	2	0	#DIV/0!		2	0	#DIV/0!
Serine/threonine-protein phosphatase 2B catalytic subunit alpha isoform OS=Homo sapiens GN=PPP3CA PE=1 SV=1	PP2BA_HUMAN	59 kDa	3	0	#DIV/0!		3	0	#DIV/0!
Proteasome subunit beta type-5 OS=Homo sapiens GN=PSMB5 PE=1 SV=3	PSB5_HUMAN	28 kDa	2	0	#DIV/0!		6	0	#DIV/0!
26S proteasome non-ATPase regulatory subunit 5 OS=Homo sapiens GN=PSMD5 PE=1 SV=3	PSMD5_HUMAN	56 kDa	3	0	#DIV/0!		2	0	#DIV/0!
26S proteasome non-ATPase regulatory subunit 7 OS=Homo sapiens GN=PSMD7 PE=1 SV=2	PSMD7_HUMAN	37 kDa	5	2	2.5		2	0	#DIV/0!
Ribonucleoside-diphosphate reductase large subunit OS=Homo sapiens GN=RRM1 PE=1 SV=1	RIR1_HUMAN	90 kDa	2	0	#DIV/0!		2	0	#DIV/0!
40S ribosomal protein S13 OS=Homo sapiens GN=RPS13 PE=1 SV=2	RS13_HUMAN	17 kDa	3	0	#DIV/0!		2	0	#DIV/0!
Prosaposin OS=Homo sapiens GN=PSAP PE=1 SV=2	SAP_HUMAN	58 kDa	3	0	#DIV/0!		3	0	#DIV/0!
Translocation protein SEC63 homolog OS=Homo sapiens GN=SEC63 PE=1 SV=2	SEC63_HUMAN	88 kDa	5	0	#DIV/0!		2	0	#DIV/0!
Structural maintenance of chromosomes protein 1A OS=Homo sapiens GN=SMC1A PE=1 SV=2	SMC1A_HUMAN	143 kDa	7	3	2.33333		6	3	2
Spectrin beta chain, non-erythrocytic 1 OS=Homo sapiens GN=SPTBN1 PE=1 SV=2	SPTB2_HUMAN	275 kDa	11	3	3.66667		15	4	3.75
Signal recognition particle subunit SRP68 OS=Homo sapiens GN=SRP68 PE=1 SV=2	SRP68_HUMAN	71 kDa	4	0	#DIV/0!		2	0	#DIV/0!
Signal transducing adapter molecule 1 OS=Homo sapiens GN=STAM PE=1 SV=3	STAM1_HUMAN	59 kDa	2	0	#DIV/0!		2	0	#DIV/0!
Transmembrane protein 165 OS=Homo sapiens GN=TMEM165 PE=1 SV=1	TM165_HUMAN	35 kDa	2	0	#DIV/0!		2	0	#DIV/0!
Transmembrane 9 superfamily member 3 OS=Homo sapiens GN=TM9SF3 PE=1 SV=2	TM9S3_HUMAN	68 kDa	2	0	#DIV/0!		2	0	#DIV/0!
Translin-associated protein X OS=Homo sapiens GN=TSNAX PE=1 SV=1	TSNAX_HUMAN	33 kDa	3	0	#DIV/0!		2	0	#DIV/0!
U3 small nucleolar RNA-interacting protein 2 OS=Homo sapiens GN=RRP9 PE=1 SV=1	U3IP2_HUMAN	52 kDa	3	0	#DIV/0!		2	0	#DIV/0!
SUMO-conjugating enzyme UBC9 OS=Homo sapiens GN=UBE2I PE=1 SV=1	UBC9_HUMAN	18 kDa	6	2	3		5	2	2.5
E3 ubiquitin-protein ligase UBR4 OS=Homo sapiens GN=UBR4 PE=1 SV=1	UBR4_HUMAN	574 kDa	4	0	#DIV/0!		3	0	#DIV/0!
Synaptic vesicle membrane protein VAT-1 homolog OS=Homo sapiens GN=VAT1 PE=1 SV=2	VAT1_HUMAN	42 kDa	7	0	#DIV/0!		6	2	3
			420	Total	38	573
			148	siCD44 up	1	143
			272	siCD44 down	37	430
