# Supplementary material for: Machine learning-assisted elucidation of CD81–CD44 interactions in promoting cancer stemness and extracellular vesicle integrity
Source: eLife. 2022 Oct 4;11:e82669. doi: 10.7554/eLife.82669 (PMC9581534; doi:10.7554/eLife.82669)
Supplement: Supplementary file 3. [file elife-82669-supp3.xlsx]

## Sheet: Down 1.5 fold Annotation
Input ID	Gene ID	Type	Tax ID	Homologene Gene ID	Homologene Gene Tax ID	Gene Symbol	Description	Biological Process (GO)	Kinase Class (UniProt)	Protein Function (Protein Atlas)	Subcellular Location (Protein Atlas)	Drug (DrugBank)	Canonical Pathways_x000D_	Hallmark Gene Sets_x000D_	GO:0031400 negative regulation of protein	GO:0050679 positive regulation of epithel	GO:0008285 negative regulation of cell pr	GO:0034260 negative regulation of GTPase	GO:0042063 gliogenesis	GO:0010721 negative regulation of cell de	GO:0035690 cellular response to drug	GO:0007507 heart development	GO:0060993 kidney morphogenesis	R-HSA-8957275 Post-translational protein pho	GO:0048589 developmental growth	GO:0030155 regulation of cell adhesion	GO:0090288 negative regulation of cellula	hsa05202 Transcriptional misregulation	GO:0009612 response to mechanical stimulu
DUSP4	1846	symbol	H. sapiens	1846	H. sapiens	DUSP4	dual specificity phosphatase 4	GO:0000188 inactivation of MAPK activity;GO:0043407 negative regulation of MAP kinase activity;GO:0070373 negative regulation of ERK1 and ERK2 cascade		Enzymes/ENZYME proteins/Hydrolases	Nucleoplasm(Supported)		(M4910)ST ERK1 ERK2 MAPK PATHWAY; (M3721)ST JNK MAPK PATHWAY	(M5890)HALLMARK TNFA SIGNALING VIA NFKB	1	0	0	0	0	0	0	0	0	0	0	0	0	0	0
SGCB	6443	symbol	H. sapiens	6443	H. sapiens	SGCB	sarcoglycan beta	GO:0097084 vascular smooth muscle cell development;GO:0035886 vascular smooth muscle cell differentiation;GO:0055013 cardiac muscle cell development			Cytosol(Approved)			(M5930)HALLMARK EPITHELIAL MESENCHYMAL TRANSITION	0	0	0	0	0	0	0	1	0	0	0	0	0	0	0
ANO1	55107	symbol	H. sapiens	55107	H. sapiens	ANO1	anoctamin 1	GO:0035774 positive regulation of insulin secretion involved in cellular response to glucose stimulus;GO:0061178 regulation of insulin secretion involved in cellular response to glucose stimulus;GO:0015705 iodide transport		Transporters/Transporter channels and pores		Crofelemer (Voltage-gated chloride channel activity)		(M5953)HALLMARK KRAS SIGNALING UP	0	0	0	0	0	0	1	0	0	0	0	0	0	0	0
FOXQ1	94234	symbol	H. sapiens	94234	H. sapiens	FOXQ1	forkhead box Q1	GO:0031069 hair follicle morphogenesis;GO:0048730 epidermis morphogenesis;GO:0001942 hair follicle development		Transcription factors/Helix-turn-helix domains	Nucleus(Supported)				0	0	0	0	0	0	0	0	0	0	0	0	0	0	0
PRDM8	56978	symbol	H. sapiens	56978	H. sapiens	PRDM8	PR/SET domain 8	GO:0014003 oligodendrocyte development;GO:0048709 oligodendrocyte differentiation;GO:0021782 glial cell development		Transcription factors/Zinc-coordinating DNA-binding domains	Nuclear bodies(Approved)				0	0	0	0	1	0	0	0	0	0	0	0	0	0	0
MYADM	91663	symbol	H. sapiens	91663	H. sapiens	MYADM	myeloid associated differentiation marker	GO:0034115 negative regulation of heterotypic cell-cell adhesion;GO:0090038 negative regulation of protein kinase C signaling;GO:0070587 regulation of cell-cell adhesion involved in gastrulation		Transporters/Transporter channels and pores	Nuclear speckles(Approved)				1	0	0	1	0	0	0	0	0	0	1	1	0	0	0
LAMA3	3909	symbol	H. sapiens	3909	H. sapiens	LAMA3	laminin subunit alpha 3	GO:0031581 hemidesmosome assembly;GO:0035987 endodermal cell differentiation;GO:0001706 endoderm formation			Endoplasmic reticulum(Enhanced)		(M158)PID INTEGRIN4 PATHWAY; (M165)PID SYNDECAN 4 PATHWAY; (M240)PID SYNDECAN 2 PATHWAY	(M5915)HALLMARK APICAL JUNCTION; (M5930)HALLMARK EPITHELIAL MESENCHYMAL TRANSITION	0	0	0	0	0	0	0	0	0	1	0	1	0	0	0
SOX9	6662	symbol	H. sapiens	6662	H. sapiens	SOX9	SRY-box 9	GO:0090190 positive regulation of branching involved in ureteric bud morphogenesis;GO:0072289 metanephric nephron tubule formation;GO:0072034 renal vesicle induction		Transcription factors/Other all-alpha-helical DNA-binding domains	Nucleoplasm(Enhanced)			(M5953)HALLMARK KRAS SIGNALING UP; (M5937)HALLMARK GLYCOLYSIS	0	1	1	0	1	1	1	1	1	0	1	1	0	0	1
KLF12	11278	symbol	H. sapiens	11278	H. sapiens	KLF12	Kruppel like factor 12	GO:0000122 negative regulation of transcription by RNA polymerase II;GO:0045944 positive regulation of transcription by RNA polymerase II;GO:0045892 negative regulation of transcription, DNA-templated		Transcription factors/Zinc-coordinating DNA-binding domains	Cytosol;Nucleoplasm(Approved)				0	0	0	0	0	0	0	0	0	0	0	0	0	0	0
PEG10	23089	symbol	H. sapiens	23089	H. sapiens	PEG10	paternally expressed 10	GO:0030512 negative regulation of transforming growth factor beta receptor signaling pathway;GO:1903845 negative regulation of cellular response to transforming growth factor beta stimulus;GO:0017015 regulation of transforming growth factor beta receptor signaling pathway			Cytosol;Nucleus(Supported)		(M66)PID MYC ACTIV PATHWAY		0	0	0	0	0	0	0	0	0	0	0	0	1	0	0
SLC44A1	23446	symbol	H. sapiens	23446	H. sapiens	SLC44A1	solute carrier family 44 member 1	GO:0042426 choline catabolic process;GO:0015871 choline transport;GO:0019695 choline metabolic process		CD markers;Transporters/Electrochemical Potential-driven transporters	Mitochondria(Supported)Nucleoplasm(Approved)				0	0	0	0	0	0	0	0	0	0	0	0	0	0	0
ZBTB41	360023	symbol	H. sapiens	360023	H. sapiens	ZBTB41	zinc finger and BTB domain containing 41	GO:0006357 regulation of transcription by RNA polymerase II;GO:0006366 transcription by RNA polymerase II;GO:0006355 regulation of transcription, DNA-templated		Transcription factors/Zinc-coordinating DNA-binding domains	Cytosol;Nuclear membrane;Nucleus(Approved)				0	0	0	0	0	0	0	0	0	0	0	0	0	0	0
IFITM10	402778	symbol	H. sapiens	402778	H. sapiens	IFITM10	interferon induced transmembrane protein 10								0	0	0	0	0	0	0	0	0	0	0	0	0	0	0
LRRK2	120892	symbol	H. sapiens	120892	H. sapiens	LRRK2	leucine rich repeat kinase 2	GO:1903217 negative regulation of protein processing involved in protein targeting to mitochondrion;GO:1903125 negative regulation of thioredoxin peroxidase activity by peptidyl-threonine phosphorylation;GO:1903216 regulation of protein processing involved in protein targeting to mitochondrion	TKL Ser/Thr protein kinase family	Enzymes/{ENZYME proteins/Transferases,Kinases/TKL Ser/Thr protein kinases}	Nucleus;Vesicles(Approved)				1	0	0	1	0	1	1	0	1	0	0	0	0	0	0
PHLDA1	22822	symbol	H. sapiens	22822	H. sapiens	PHLDA1	pleckstrin homology like domain family A member 1	GO:0045210 FasL biosynthetic process;GO:0000086 G2/M transition of mitotic cell cycle;GO:0044839 cell cycle G2/M phase transition			Nucleoli(Supported)			(M5890)HALLMARK TNFA SIGNALING VIA NFKB; (M5947)HALLMARK IL2 STAT5 SIGNALING	0	0	0	0	0	0	0	0	0	0	0	0	0	0	0
TCN1	6947	symbol	H. sapiens	6947	H. sapiens	TCN1	transcobalamin 1	GO:0006824 cobalt ion transport;GO:0015889 cobalamin transport;GO:0009235 cobalamin metabolic process				Hydroxocobalamin (Cobalamin binding)			0	0	0	0	0	0	0	0	0	0	0	0	0	0	0
ATP1A1	476	symbol	H. sapiens	476	H. sapiens	ATP1A1	ATPase Na+/K+ transporting subunit alpha 1	GO:0031947 negative regulation of glucocorticoid biosynthetic process;GO:0090032 negative regulation of steroid hormone biosynthetic process;GO:0031946 regulation of glucocorticoid biosynthetic process		Enzymes/ENZYME proteins/Hydrolases;Transporters/Primary Active Transporters		Digoxin (Steroid hormone binding);Acetyldigitoxin (Steroid hormone binding);Hydroflumethiazide (Steroid hormone binding);Etacrynic acid (Steroid hormone binding);Trichlormethiazide (Steroid hormone binding);Deslanoside (Steroid hormone binding);Ouabain (Steroid hormone binding);Diazoxide (Steroid hormone binding);Bretylium (Steroid hormone binding);Ciclopirox (Steroid hormone binding);Bepridil (S…		(M5910)HALLMARK PROTEIN SECRETION	0	0	0	0	0	0	1	0	0	0	0	0	0	0	1
FEZF1-AS1	154860	symbol	H. sapiens	154860	H. sapiens	FEZF1-AS1	FEZF1 antisense RNA 1								0	0	0	0	0	0	0	0	0	0	0	0	0	0	0
PLXNB3	5365	symbol	H. sapiens	5365	H. sapiens	PLXNB3	plexin B3	GO:1902287 semaphorin-plexin signaling pathway involved in axon guidance;GO:0010593 negative regulation of lamellipodium assembly;GO:1902285 semaphorin-plexin signaling pathway involved in neuron projection guidance					(M5880)NABA ECM AFFILIATED; (M5885)NABA MATRISOME ASSOCIATED; (M5889)NABA MATRISOME		0	1	0	1	0	0	0	0	0	0	0	1	0	0	0
TBXAS1	6916	symbol	H. sapiens	6916	H. sapiens	TBXAS1	thromboxane A synthase 1	GO:0019371 cyclooxygenase pathway;GO:0001516 prostaglandin biosynthetic process;GO:0046457 prostanoid biosynthetic process		Enzymes/ENZYME proteins/Isomerase	Vesicles(Supported)	Sulfasalazine (Thromboxane-a synthase activity);Ridogrel (Thromboxane-a synthase activity);Dazoxiben (Thromboxane-a synthase activity);NM-702 (Thromboxane-a synthase activity)			0	0	0	0	0	0	0	0	0	0	0	0	0	0	0
PRNP	5621	symbol	H. sapiens	5621	H. sapiens	PRNP	prion protein	GO:1905664 regulation of calcium ion import across plasma membrane;GO:0098703 calcium ion import across plasma membrane;GO:0050860 negative regulation of T cell receptor signaling pathway		CD markers;Transporters/Transporter channels and pores	Cytosol;Nuclear membrane;Vesicles(Approved)	Tetracycline (Tubulin binding)	(M33)PID GLYPICAN 1PATHWAY	(M5938)HALLMARK REACTIVE OXIGEN SPECIES PATHWAY; (M5947)HALLMARK IL2 STAT5 SIGNALING; (M5909)HALLMARK MYOGENESIS	1	0	1	1	0	1	1	0	0	0	0	1	0	0	0
ETV1	2115	symbol	H. sapiens	2115	H. sapiens	ETV1	ETS variant 1	GO:0048935 peripheral nervous system neuron development;GO:0048934 peripheral nervous system neuron differentiation;GO:0007638 mechanosensory behavior		Transcription factors/Helix-turn-helix domains	Nucleoplasm(Approved)		(M199)PID P38 MK2 PATHWAY	(M5953)HALLMARK KRAS SIGNALING UP	0	0	0	1	0	0	0	1	0	0	0	0	0	1	1
PHLDA2	7262	symbol	H. sapiens	7262	H. sapiens	PHLDA2	pleckstrin homology like domain family A member 2	GO:0006915 apoptotic process;GO:0012501 programmed cell death;GO:0008219 cell death			Nucleoli(Uncertain)			(M5890)HALLMARK TNFA SIGNALING VIA NFKB	0	0	0	0	0	0	0	0	0	0	0	0	0	0	0
EPHX1	2052	symbol	H. sapiens	2052	H. sapiens	EPHX1	epoxide hydrolase 1	GO:0097176 epoxide metabolic process;GO:0018904 ether metabolic process;GO:0006805 xenobiotic metabolic process		Enzymes/{ENZYME proteins/Hydrolases,Peptidases/Serine-type peptidases}				(M5941)HALLMARK UV RESPONSE UP; (M5935)HALLMARK FATTY ACID METABOLISM; (M5939)HALLMARK P53 PATHWAY	0	0	0	0	0	0	1	0	0	0	0	0	0	0	0
PTPRS	5802	symbol	H. sapiens	5802	H. sapiens	PTPRS	protein tyrosine phosphatase, receptor type S	GO:0034164 negative regulation of toll-like receptor 9 signaling pathway;GO:0034163 regulation of toll-like receptor 9 signaling pathway;GO:0048671 negative regulation of collateral sprouting		Enzymes/ENZYME proteins/Hydrolases	Cytosol;Plasma membrane(Approved)	Alendronic acid (Transmembrane receptor protein tyrosine phosphatase activity);Etidronic acid (Transmembrane receptor protein tyrosine phosphatase activity)			0	0	0	1	0	1	0	0	1	0	1	0	0	0	0
KLF2	10365	symbol	H. sapiens	10365	H. sapiens	KLF2	Kruppel like factor 2	GO:0060509 type I pneumocyte differentiation;GO:0071409 cellular response to cycloheximide;GO:0097533 cellular stress response to acid chemical		Transcription factors/Zinc-coordinating DNA-binding domains	Nucleoplasm(Approved)			(M5890)HALLMARK TNFA SIGNALING VIA NFKB	0	0	0	0	0	0	1	0	1	0	1	0	0	0	0
IER5L	389792	symbol	H. sapiens	389792	H. sapiens	IER5L	immediate early response 5 like				Nucleus(Approved)				0	0	0	0	0	0	0	0	0	0	0	0	0	0	0
KCTD12	115207	symbol	H. sapiens	115207	H. sapiens	KCTD12	potassium channel tetramerization domain containing 12	GO:0051260 protein homooligomerization;GO:0051259 protein complex oligomerization;GO:0065003 protein-containing complex assembly			Mitochondria(Approved)				0	0	0	0	0	0	0	0	0	0	0	0	0	0	0
GPC1	2817	symbol	H. sapiens	2817	H. sapiens	GPC1	glypican 1	GO:2001016 positive regulation of skeletal muscle cell differentiation;GO:0030200 heparan sulfate proteoglycan catabolic process;GO:0030167 proteoglycan catabolic process			Plasma membrane(Supported)Cytosol(Approved)		(M33)PID GLYPICAN 1PATHWAY; (M5880)NABA ECM AFFILIATED; (M5885)NABA MATRISOME ASSOCIATED	(M5891)HALLMARK HYPOXIA; (M5930)HALLMARK EPITHELIAL MESENCHYMAL TRANSITION; (M5937)HALLMARK GLYCOLYSIS	0	0	0	1	1	0	0	1	1	0	0	0	1	0	0
IRF2BPL	64207	symbol	H. sapiens	64207	H. sapiens	IRF2BPL	interferon regulatory factor 2 binding protein like	GO:0046543 development of secondary female sexual characteristics;GO:0045136 development of secondary sexual characteristics;GO:0000122 negative regulation of transcription by RNA polymerase II			Nucleoplasm(Enhanced)				0	0	0	0	0	0	0	0	0	0	0	0	0	0	0
SPRY1	10252	symbol	H. sapiens	10252	H. sapiens	SPRY1	sprouty RTK signaling antagonist 1	GO:0060940 epithelial to mesenchymal transition involved in cardiac fibroblast development;GO:0060939 epicardium-derived cardiac fibroblast cell development;GO:0051387 negative regulation of neurotrophin TRK receptor signaling pathway			Cytosol;Golgi apparatus;Nucleoplasm(Approved)				1	0	1	1	0	0	0	1	1	0	1	0	1	0	0
SOX4	6659	symbol	H. sapiens	6659	H. sapiens	SOX4	SRY-box 4	GO:2000761 positive regulation of N-terminal peptidyl-lysine acetylation;GO:0006977 DNA damage response, signal transduction by p53 class mediator resulting in cell cycle arrest;GO:2000759 regulation of N-terminal peptidyl-lysine acetylation		Transcription factors/Other all-alpha-helical DNA-binding domains	Nucleoplasm(Supported)Mitochondria(Approved)				1	0	1	0	1	0	1	1	1	0	0	0	0	0	0
IGFBP3	3486	symbol	H. sapiens	3486	H. sapiens	IGFBP3	insulin like growth factor binding protein 3	GO:0043568 positive regulation of insulin-like growth factor receptor signaling pathway;GO:0014912 negative regulation of smooth muscle cell migration;GO:0043567 regulation of insulin-like growth factor receptor signaling pathway			Cytosol;Nucleoplasm;Vesicles(Approved)	Mecasermin (Protein tyrosine phosphatase activator activity)	(M236)PID DELTA NP63 PATHWAY; (M256)PID TAP63 PATHWAY; (M145)PID P53 DOWNSTREAM PATHWAY	(M5891)HALLMARK HYPOXIA; (M5930)HALLMARK EPITHELIAL MESENCHYMAL TRANSITION; (M5953)HALLMARK KRAS SIGNALING UP	1	1	1	0	0	0	1	1	1	1	1	0	0	1	0
TGFA	7039	symbol	H. sapiens	7039	H. sapiens	TGFA	transforming growth factor alpha	GO:0045741 positive regulation of epidermal growth factor-activated receptor activity;GO:0048208 COPII vesicle coating;GO:0007176 regulation of epidermal growth factor-activated receptor activity			Vesicles(Approved)		(M201)PID ERBB NETWORK PATHWAY; (M176)PID FOXM1 PATHWAY; (M145)PID P53 DOWNSTREAM PATHWAY	(M5939)HALLMARK P53 PATHWAY; (M5937)HALLMARK GLYCOLYSIS	1	1	0	0	0	0	0	0	1	0	0	0	0	0	0
G6PD	2539	symbol	H. sapiens	2539	H. sapiens	G6PD	glucose-6-phosphate dehydrogenase	GO:1904879 positive regulation of calcium ion transmembrane transport via high voltage-gated calcium channel;GO:0061052 negative regulation of cell growth involved in cardiac muscle cell development;GO:0010734 negative regulation of protein glutathionylation		Enzymes/ENZYME proteins/Oxidoreductases	Cytosol(Supported)Microtubule organizing center;Vesicles(Approved)	Hydroxyacetic Acid (Protein homodimerization activity);2'-Monophosphoadenosine 5'-Diphosphoribose (Protein homodimerization activity);16-Bromoepiandrosterone (Protein homodimerization activity)		(M5938)HALLMARK REACTIVE OXIGEN SPECIES PATHWAY; (M5924)HALLMARK MTORC1 SIGNALING; (M5937)HALLMARK GLYCOLYSIS	1	0	0	0	0	1	1	1	0	0	1	0	0	0	0
SCG2	7857	symbol	H. sapiens	7857	H. sapiens	SCG2	secretogranin II	GO:0048245 eosinophil chemotaxis;GO:0050930 induction of positive chemotaxis;GO:0072677 eosinophil migration						(M5919)HALLMARK HEDGEHOG SIGNALING; (M5930)HALLMARK EPITHELIAL MESENCHYMAL TRANSITION	0	1	1	0	0	0	0	0	0	1	0	0	0	0	0
ADIRF	10974	symbol	H. sapiens	10974	H. sapiens	ADIRF	adipogenesis regulatory factor	GO:0072719 cellular response to cisplatin;GO:0072718 response to cisplatin;GO:0045600 positive regulation of fat cell differentiation			Nucleoplasm(Supported)Cytosol(Approved)				0	0	0	0	0	0	1	0	0	0	0	0	0	0	0
FTH1	2495	symbol	H. sapiens	2495	H. sapiens	FTH1	ferritin heavy chain 1	GO:0006880 intracellular sequestering of iron ion;GO:0097577 sequestering of iron ion;GO:0097286 iron ion import		Enzymes/ENZYME proteins/Oxidoreductases	Microtubules(Approved)	Iron Dextran (Iron ion binding)	(M254)PID MYC REPRESS PATHWAY		0	0	1	0	0	0	1	0	0	0	0	0	0	0	0
SCN5A	6331	symbol	H. sapiens	6331	H. sapiens	SCN5A	sodium voltage-gated channel alpha subunit 5	GO:0086047 membrane depolarization during Purkinje myocyte cell action potential;GO:0086048 membrane depolarization during bundle of His cell action potential;GO:0098912 membrane depolarization during atrial cardiac muscle cell action potential		Transporters/Transporter channels and pores;Voltage-gated ion channels/Voltage-Gated Sodium Channels		Indecainide (Voltage-gated sodium channel activity involved in sa node cell action potential);Ranolazine (Voltage-gated sodium channel activity involved in sa node cell action potential);Phenytoin (Voltage-gated sodium channel activity involved in sa node cell action potential);Disopyramide (Voltage-gated sodium channel activity involved in sa node cell action potential);Lidocaine (Voltage-gated …			0	1	0	0	0	1	1	1	0	0	0	0	0	0	0
ADGRG1	9289	symbol	H. sapiens	9289	H. sapiens	ADGRG1	adhesion G protein-coupled receptor G1	GO:0021819 layer formation in cerebral cortex;GO:0021801 cerebral cortex radial glia guided migration;GO:0021796 cerebral cortex regionalization		G-protein coupled receptors/{Family 2 (B) receptors,GPCRs excl olfactory receptors}				(M5919)HALLMARK HEDGEHOG SIGNALING	0	0	1	0	1	1	0	0	0	0	0	1	0	0	0
EMP1	2012	symbol	H. sapiens	2012	H. sapiens	EMP1	epithelial membrane protein 1	GO:0032060 bleb assembly;GO:0008544 epidermis development;GO:0120031 plasma membrane bounded cell projection assembly			Nucleoplasm(Approved)			(M5902)HALLMARK APOPTOSIS; (M5953)HALLMARK KRAS SIGNALING UP; (M5947)HALLMARK IL2 STAT5 SIGNALING	0	0	0	0	0	0	0	0	0	0	0	0	0	0	0
CCNA1	8900	symbol	H. sapiens	8900	H. sapiens	CCNA1	cyclin A1	GO:0007141 male meiosis I;GO:0000083 regulation of transcription involved in G1/S transition of mitotic cell cycle;GO:0000079 regulation of cyclin-dependent protein serine/threonine kinase activity			Nuclear bodies;Nucleoplasm(Approved)		(M3686)SA REG CASCADE OF CYCLIN EXPR; (M195)PID CMYB PATHWAY	(M5951)HALLMARK SPERMATOGENESIS; (M5902)HALLMARK APOPTOSIS; (M5956)HALLMARK KRAS SIGNALING DN	1	0	0	0	0	0	0	0	0	0	0	0	0	1	0
IGFBP1	3484	symbol	H. sapiens	3484	H. sapiens	IGFBP1	insulin like growth factor binding protein 1	GO:0036499 PERK-mediated unfolded protein response;GO:0008286 insulin receptor signaling pathway;GO:0090090 negative regulation of canonical Wnt signaling pathway			Golgi apparatus(Approved)		(M14532)ST PHOSPHOINOSITIDE 3 KINASE PATHWAY; (M106)PID HNF3B PATHWAY; (M7955)SIG INSULIN RECEPTOR PATHWAY IN CARDIAC MYOCYTES	(M5922)HALLMARK UNFOLDED PROTEIN RESPONSE; (M5891)HALLMARK HYPOXIA; (M5934)HALLMARK XENOBIOTIC METABOLISM	0	0	0	0	0	0	1	0	1	1	1	0	0	0	0
UBE2R2	54926	symbol	H. sapiens	54926	H. sapiens	UBE2R2	ubiquitin conjugating enzyme E2 R2	GO:0070936 protein K48-linked ubiquitination;GO:0006513 protein monoubiquitination;GO:0043161 proteasome-mediated ubiquitin-dependent protein catabolic process		Enzymes/ENZYME proteins/Transferases	Nucleoli;Nucleus(Approved)				0	0	0	0	0	0	0	0	0	0	0	0	0	0	0
CDC34	997	symbol	H. sapiens	997	H. sapiens	CDC34	cell division cycle 34	GO:0090261 positive regulation of inclusion body assembly;GO:0043951 negative regulation of cAMP-mediated signaling;GO:0090083 regulation of inclusion body assembly		Enzymes/ENZYME proteins/Transferases	Cytosol;Nuclear speckles(Supported)			(M5941)HALLMARK UV RESPONSE UP	1	0	0	0	0	1	1	0	0	0	0	0	0	0	0
CD81	975	symbol	H. sapiens	975	H. sapiens	CD81	CD81 molecule	GO:0043128 positive regulation of 1-phosphatidylinositol 4-kinase activity;GO:0046813 receptor-mediated virion attachment to host cell;GO:0043126 regulation of 1-phosphatidylinositol 4-kinase activity		CD markers;Transporters/Accessory Factors Involved in Transport	Plasma membrane(Supported)		(M277)PID INTEGRIN A4B1 PATHWAY; (M8626)SIG BCR SIGNALING PATHWAY; (M18)PID INTEGRIN1 PATHWAY	(M5939)HALLMARK P53 PATHWAY; (M5947)HALLMARK IL2 STAT5 SIGNALING	1	0	0	0	0	0	0	0	1	0	0	0	0	0	0

## Sheet: Enrichment
Supplementary file 3. GO Analysis of siCD81 downregulated and upregulated genes (±1.5 fold by RNA seq) (Table S2)
GO analysis of downregulated genes in siCD81 cells
GroupID	Category	Term	Description	LogP	Log(q-value)	InTerm_InList	Genes	Symbols
1_Summary	GO Biological Processes	GO:0031400	negative regulation of protein modification process	-4.91709	-0.602111	8/592	1846,2539,3486,5621,6659,10252,91663,120892,975,7039,8900,997	DUSP4,G6PD,IGFBP3,PRNP,SOX4,SPRY1,MYADM,LRRK2,CD81,TGFA,CCNA1,CDC34
1_Member	GO Biological Processes	GO:0031400	negative regulation of protein modification process	-4.91709	-0.602111	8/592	1846,2539,3486,5621,6659,10252,91663,120892	DUSP4,G6PD,IGFBP3,PRNP,SOX4,SPRY1,MYADM,LRRK2
1_Member	GO Biological Processes	GO:0001933	negative regulation of protein phosphorylation	-3.97913	-0.373885	6/408	1846,3486,5621,10252,91663,120892	DUSP4,IGFBP3,PRNP,SPRY1,MYADM,LRRK2
1_Member	GO Biological Processes	GO:0042326	negative regulation of phosphorylation	-3.75812	-0.346222	6/448	1846,3486,5621,10252,91663,120892	DUSP4,IGFBP3,PRNP,SPRY1,MYADM,LRRK2
1_Member	GO Biological Processes	GO:1903317	regulation of protein maturation	-3.51992	-0.227911	4/173	975,5621,6659,120892	CD81,PRNP,SOX4,LRRK2
1_Member	GO Biological Processes	GO:0071900	regulation of protein serine/threonine kinase activity	-3.50182	-0.227911	6/500	975,1846,7039,8900,10252,120892	CD81,DUSP4,TGFA,CCNA1,SPRY1,LRRK2
1_Member	GO Biological Processes	GO:0043405	regulation of MAP kinase activity	-3.38826	-0.212587	5/339	975,1846,7039,10252,120892	CD81,DUSP4,TGFA,SPRY1,LRRK2
1_Member	GO Biological Processes	GO:1902532	negative regulation of intracellular signal transduction	-3.36301	-0.212587	6/531	997,1846,5621,10252,91663,120892	CDC34,DUSP4,PRNP,SPRY1,MYADM,LRRK2
1_Member	GO Biological Processes	GO:0045859	regulation of protein kinase activity	-3.30044	-0.212587	7/766	975,1846,5621,7039,8900,10252,120892	CD81,DUSP4,PRNP,TGFA,CCNA1,SPRY1,LRRK2
1_Member	GO Biological Processes	GO:0045936	negative regulation of phosphate metabolic process	-3.22106	-0.203086	6/565	1846,3486,5621,10252,91663,120892	DUSP4,IGFBP3,PRNP,SPRY1,MYADM,LRRK2
1_Member	GO Biological Processes	GO:0010563	negative regulation of phosphorus metabolic process	-3.21704	-0.203086	6/566	1846,3486,5621,10252,91663,120892	DUSP4,IGFBP3,PRNP,SPRY1,MYADM,LRRK2
1_Member	GO Biological Processes	GO:0000187	activation of MAPK activity	-2.55941	0	3/150	975,7039,120892	CD81,TGFA,LRRK2
1_Member	GO Biological Processes	GO:0032147	activation of protein kinase activity	-2.51629	0	4/323	975,5621,7039,120892	CD81,PRNP,TGFA,LRRK2
1_Member	GO Biological Processes	GO:0043408	regulation of MAPK cascade	-2.50185	0	6/782	975,1846,3486,7039,10252,120892	CD81,DUSP4,IGFBP3,TGFA,SPRY1,LRRK2
1_Member	GO Biological Processes	GO:0070613	regulation of protein processing	-2.39943	0	3/171	975,5621,120892	CD81,PRNP,LRRK2
1_Member	GO Biological Processes	GO:0050731	positive regulation of peptidyl-tyrosine phosphorylation	-2.29768	0	3/186	975,5621,7039	CD81,PRNP,TGFA
1_Member	GO Biological Processes	GO:0051604	protein maturation	-2.26611	0	4/380	975,5621,6659,120892	CD81,PRNP,SOX4,LRRK2
2_Summary	GO Biological Processes	GO:0050679	positive regulation of epithelial cell proliferation	-4.42895	-0.415002	5/203	5365,6331,6662,7039,7857,3486	PLXNB3,SCN5A,SOX9,TGFA,SCG2,IGFBP3
2_Member	GO Biological Processes	GO:0050679	positive regulation of epithelial cell proliferation	-4.42895	-0.415002	5/203	5365,6331,6662,7039,7857	PLXNB3,SCN5A,SOX9,TGFA,SCG2
2_Member	GO Biological Processes	GO:0050673	epithelial cell proliferation	-3.84377	-0.373885	6/432	3486,5365,6331,6662,7039,7857	IGFBP3,PLXNB3,SCN5A,SOX9,TGFA,SCG2
2_Member	GO Biological Processes	GO:0050678	regulation of epithelial cell proliferation	-3.17383	-0.182961	5/378	5365,6331,6662,7039,7857	PLXNB3,SCN5A,SOX9,TGFA,SCG2
3_Summary	GO Biological Processes	GO:0008285	negative regulation of cell proliferation	-4.15334	-0.373885	8/758	2495,3486,5621,6659,6662,7857,9289,10252	FTH1,IGFBP3,PRNP,SOX4,SOX9,SCG2,ADGRG1,SPRY1
3_Member	GO Biological Processes	GO:0008285	negative regulation of cell proliferation	-4.15334	-0.373885	8/758	2495,3486,5621,6659,6662,7857,9289,10252	FTH1,IGFBP3,PRNP,SOX4,SOX9,SCG2,ADGRG1,SPRY1
4_Summary	GO Biological Processes	GO:0034260	negative regulation of GTPase activity	-3.97843	-0.373885	3/49	5365,10252,120892,5621,5802,2115,2817,91663	PLXNB3,SPRY1,LRRK2,PRNP,PTPRS,ETV1,GPC1,MYADM
4_Member	GO Biological Processes	GO:0034260	negative regulation of GTPase activity	-3.97843	-0.373885	3/49	5365,10252,120892	PLXNB3,SPRY1,LRRK2
4_Member	GO Biological Processes	GO:0031345	negative regulation of cell projection organization	-3.46371	-0.227911	4/179	5365,5621,5802,120892	PLXNB3,PRNP,PTPRS,LRRK2
4_Member	GO Biological Processes	GO:0099175	regulation of postsynapse organization	-3.1154	-0.180633	3/96	5621,5802,120892	PRNP,PTPRS,LRRK2
4_Member	GO Biological Processes	GO:0000904	cell morphogenesis involved in differentiation	-2.70173	0	6/713	2115,2817,5365,5802,91663,120892	ETV1,GPC1,PLXNB3,PTPRS,MYADM,LRRK2
4_Member	GO Biological Processes	GO:0010769	regulation of cell morphogenesis involved in differentiation	-2.66888	0	4/293	5365,5802,91663,120892	PLXNB3,PTPRS,MYADM,LRRK2
4_Member	GO Biological Processes	GO:0099173	postsynapse organization	-2.48806	0	3/159	5621,5802,120892	PRNP,PTPRS,LRRK2
4_Member	GO Biological Processes	GO:0048667	cell morphogenesis involved in neuron differentiation	-2.42874	0	5/559	2115,2817,5365,5802,120892	ETV1,GPC1,PLXNB3,PTPRS,LRRK2
4_Member	GO Biological Processes	GO:0048812	neuron projection morphogenesis	-2.23659	0	5/621	2115,2817,5365,5802,120892	ETV1,GPC1,PLXNB3,PTPRS,LRRK2
4_Member	GO Biological Processes	GO:0120039	plasma membrane bounded cell projection morphogenesis	-2.19638	0	5/635	2115,2817,5365,5802,120892	ETV1,GPC1,PLXNB3,PTPRS,LRRK2
4_Member	GO Biological Processes	GO:0048858	cell projection morphogenesis	-2.19355	0	5/636	2115,2817,5365,5802,120892	ETV1,GPC1,PLXNB3,PTPRS,LRRK2
4_Member	GO Biological Processes	GO:0032990	cell part morphogenesis	-2.14077	0	5/655	2115,2817,5365,5802,120892	ETV1,GPC1,PLXNB3,PTPRS,LRRK2
4_Member	GO Biological Processes	GO:0050807	regulation of synapse organization	-2.12976	0	3/214	5621,5802,120892	PRNP,PTPRS,LRRK2
4_Member	GO Biological Processes	GO:0050803	regulation of synapse structure or activity	-2.09692	0	3/220	5621,5802,120892	PRNP,PTPRS,LRRK2
4_Member	GO Biological Processes	GO:0007409	axonogenesis	-2.0155	0	4/449	2115,2817,5365,5802	ETV1,GPC1,PLXNB3,PTPRS
4_Member	GO Biological Processes	GO:0051129	negative regulation of cellular component organization	-2.0054	0	5/707	5365,5621,5802,91663,120892	PLXNB3,PRNP,PTPRS,MYADM,LRRK2
5_Summary	GO Biological Processes	GO:0042063	gliogenesis	-3.87466	-0.373885	5/266	2817,6659,6662,9289,56978	GPC1,SOX4,SOX9,ADGRG1,PRDM8
5_Member	GO Biological Processes	GO:0042063	gliogenesis	-3.87466	-0.373885	5/266	2817,6659,6662,9289,56978	GPC1,SOX4,SOX9,ADGRG1,PRDM8
5_Member	GO Biological Processes	GO:0010001	glial cell differentiation	-3.3316	-0.212587	4/194	2817,6659,6662,56978	GPC1,SOX4,SOX9,PRDM8
6_Summary	GO Biological Processes	GO:0010721	negative regulation of cell development	-3.4659	-0.227911	5/326	2539,5802,6662,9289,120892,6331,997,5621	G6PD,PTPRS,SOX9,ADGRG1,LRRK2,SCN5A,CDC34,PRNP
6_Member	GO Biological Processes	GO:0010721	negative regulation of cell development	-3.4659	-0.227911	5/326	2539,5802,6662,9289,120892	G6PD,PTPRS,SOX9,ADGRG1,LRRK2
6_Member	GO Biological Processes	GO:0021537	telencephalon development	-2.92091	-0.0515642	4/250	5802,6331,9289,120892	PTPRS,SCN5A,ADGRG1,LRRK2
6_Member	GO Biological Processes	GO:0019932	second-messenger-mediated signaling	-2.8795	-0.0416403	5/440	997,5621,6662,9289,120892	CDC34,PRNP,SOX9,ADGRG1,LRRK2
6_Member	GO Biological Processes	GO:0050768	negative regulation of neurogenesis	-2.74617	0	4/279	5802,6662,9289,120892	PTPRS,SOX9,ADGRG1,LRRK2
6_Member	GO Biological Processes	GO:0051961	negative regulation of nervous system development	-2.64227	0	4/298	5802,6662,9289,120892	PTPRS,SOX9,ADGRG1,LRRK2
6_Member	GO Biological Processes	GO:0060322	head development	-2.56318	0	6/760	2539,5802,6331,6662,9289,120892	G6PD,PTPRS,SCN5A,SOX9,ADGRG1,LRRK2
6_Member	GO Biological Processes	GO:0019933	cAMP-mediated signaling	-2.29122	0	3/187	997,6662,9289	CDC34,SOX9,ADGRG1
6_Member	GO Biological Processes	GO:0030900	forebrain development	-2.28629	0	4/375	5802,6331,9289,120892	PTPRS,SCN5A,ADGRG1,LRRK2
6_Member	GO Biological Processes	GO:0019935	cyclic-nucleotide-mediated signaling	-2.12421	0	3/215	997,6662,9289	CDC34,SOX9,ADGRG1
6_Member	GO Biological Processes	GO:0045665	negative regulation of neuron differentiation	-2.11321	0	3/217	5802,6662,120892	PTPRS,SOX9,LRRK2
7_Summary	GO Biological Processes	GO:0035690	cellular response to drug	-3.29712	-0.212587	5/355	5621,6662,10365,10974,120892,997,2539,2052,476,2495,6659,55107,6331,3484,3486	PRNP,SOX9,KLF2,ADIRF,LRRK2,CDC34,G6PD,EPHX1,ATP1A1,FTH1,SOX4,ANO1,SCN5A,IGFBP1,IGFBP3
7_Member	GO Biological Processes	GO:0035690	cellular response to drug	-3.29712	-0.212587	5/355	5621,6662,10365,10974,120892	PRNP,SOX9,KLF2,ADIRF,LRRK2
7_Member	GO Biological Processes	GO:1901214	regulation of neuron death	-2.65285	0	4/296	997,2539,5621,120892	CDC34,G6PD,PRNP,LRRK2
7_Member	GO Biological Processes	GO:0009636	response to toxic substance	-2.58843	0	5/513	2052,2539,10365,10974,120892	EPHX1,G6PD,KLF2,ADIRF,LRRK2
7_Member	GO Biological Processes	GO:0071695	anatomical structure maturation	-2.51922	0	3/155	2539,10365,120892	G6PD,KLF2,LRRK2
7_Member	GO Biological Processes	GO:0055082	cellular chemical homeostasis	-2.51284	0	6/778	476,2495,5621,6659,55107,120892	ATP1A1,FTH1,PRNP,SOX4,ANO1,LRRK2
7_Member	GO Biological Processes	GO:0010035	response to inorganic substance	-2.46887	0	5/547	2539,5621,6331,10365,120892	G6PD,PRNP,SCN5A,KLF2,LRRK2
7_Member	GO Biological Processes	GO:0070997	neuron death	-2.45966	0	4/335	997,2539,5621,120892	CDC34,G6PD,PRNP,LRRK2
7_Member	GO Biological Processes	GO:0071417	cellular response to organonitrogen compound	-2.43205	0	5/558	3484,5621,6662,10365,120892	IGFBP1,PRNP,SOX9,KLF2,LRRK2
7_Member	GO Biological Processes	GO:0048469	cell maturation	-2.41372	0	3/169	2539,10365,120892	G6PD,KLF2,LRRK2
7_Member	GO Biological Processes	GO:0010038	response to metal ion	-2.35727	0	4/358	2539,5621,6331,120892	G6PD,PRNP,SCN5A,LRRK2
7_Member	GO Biological Processes	GO:0071248	cellular response to metal ion	-2.31072	0	3/184	5621,6331,120892	PRNP,SCN5A,LRRK2
7_Member	GO Biological Processes	GO:0010959	regulation of metal ion transport	-2.28223	0	4/376	476,2539,5621,6331	ATP1A1,G6PD,PRNP,SCN5A
7_Member	GO Biological Processes	GO:1901699	cellular response to nitrogen compound	-2.25416	0	5/615	3484,5621,6662,10365,120892	IGFBP1,PRNP,SOX9,KLF2,LRRK2
7_Member	GO Biological Processes	GO:0043523	regulation of neuron apoptotic process	-2.19858	0	3/202	997,2539,5621	CDC34,G6PD,PRNP
7_Member	GO Biological Processes	GO:0043068	positive regulation of programmed cell death	-2.19355	0	5/636	997,3486,5621,6659,120892	CDC34,IGFBP3,PRNP,SOX4,LRRK2
7_Member	GO Biological Processes	GO:0051222	positive regulation of protein transport	-2.17707	0	4/403	5621,6659,55107,120892	PRNP,SOX4,ANO1,LRRK2
7_Member	GO Biological Processes	GO:0071241	cellular response to inorganic substance	-2.16937	0	3/207	5621,6331,120892	PRNP,SCN5A,LRRK2
7_Member	GO Biological Processes	GO:1904951	positive regulation of establishment of protein localization	-2.05231	0	4/438	5621,6659,55107,120892	PRNP,SOX4,ANO1,LRRK2
7_Member	GO Biological Processes	GO:0010942	positive regulation of cell death	-2.05083	0	5/689	997,3486,5621,6659,120892	CDC34,IGFBP3,PRNP,SOX4,LRRK2
7_Member	GO Biological Processes	GO:0051402	neuron apoptotic process	-2.04435	0	3/230	997,2539,5621	CDC34,G6PD,PRNP
7_Member	GO Biological Processes	GO:0006979	response to oxidative stress	-2.0321	0	4/444	2539,5621,10365,120892	G6PD,PRNP,KLF2,LRRK2
7_Member	GO Biological Processes	GO:0097237	cellular response to toxic substance	-2.01901	0	3/235	10365,10974,120892	KLF2,ADIRF,LRRK2
8_Summary	GO Biological Processes	GO:0007507	heart development	-3.21704	-0.203086	6/566	2539,6331,6443,6659,6662,10252,2115,2817,3486	G6PD,SCN5A,SGCB,SOX4,SOX9,SPRY1,ETV1,GPC1,IGFBP3
8_Member	GO Biological Processes	GO:0007507	heart development	-3.21704	-0.203086	6/566	2539,6331,6443,6659,6662,10252	G6PD,SCN5A,SGCB,SOX4,SOX9,SPRY1
8_Member	GO Biological Processes	GO:0055006	cardiac cell development	-3.15552	-0.182961	3/93	2539,6443,10252	G6PD,SGCB,SPRY1
8_Member	GO Biological Processes	GO:0061061	muscle structure development	-2.88186	-0.0416403	6/657	2115,2539,2817,3486,6443,6662	ETV1,G6PD,GPC1,IGFBP3,SGCB,SOX9
8_Member	GO Biological Processes	GO:0035051	cardiocyte differentiation	-2.44287	0	3/165	2539,6443,10252	G6PD,SGCB,SPRY1
8_Member	GO Biological Processes	GO:0060537	muscle tissue development	-2.19972	0	4/397	2539,2817,6443,6662	G6PD,GPC1,SGCB,SOX9
8_Member	GO Biological Processes	GO:0007517	muscle organ development	-2.17334	0	4/404	2115,2539,2817,6443	ETV1,G6PD,GPC1,SGCB
9_Summary	GO Biological Processes	GO:0060993	kidney morphogenesis	-3.12863	-0.180633	3/95	6659,6662,120892,3484,7039,10252,2817,3486,10365,975,5802	SOX4,SOX9,LRRK2,IGFBP1,TGFA,SPRY1,GPC1,IGFBP3,KLF2,CD81,PTPRS
9_Member	GO Biological Processes	GO:0060993	kidney morphogenesis	-3.12863	-0.180633	3/95	6659,6662,120892	SOX4,SOX9,LRRK2
9_Member	GO Biological Processes	GO:0060828	regulation of canonical Wnt signaling pathway	-3.01342	-0.0963792	4/236	3484,6659,6662,120892	IGFBP1,SOX4,SOX9,LRRK2
9_Member	GO Biological Processes	GO:0007173	epidermal growth factor receptor signaling pathway	-2.82511	-0.0152786	3/121	6662,7039,10252	SOX9,TGFA,SPRY1
9_Member	GO Biological Processes	GO:0001822	kidney development	-2.78645	-0.00113813	4/272	6659,6662,10252,120892	SOX4,SOX9,SPRY1,LRRK2
9_Member	GO Biological Processes	GO:0007169	transmembrane receptor protein tyrosine kinase signaling pathway	-2.75458	0	6/696	2817,3484,3486,6662,7039,10252	GPC1,IGFBP1,IGFBP3,SOX9,TGFA,SPRY1
9_Member	GO Biological Processes	GO:0060070	canonical Wnt signaling pathway	-2.71808	0	4/284	3484,6659,6662,120892	IGFBP1,SOX4,SOX9,LRRK2
9_Member	GO Biological Processes	GO:0072001	renal system development	-2.70149	0	4/287	6659,6662,10252,120892	SOX4,SOX9,SPRY1,LRRK2
9_Member	GO Biological Processes	GO:0038127	ERBB signaling pathway	-2.60959	0	3/144	6662,7039,10252	SOX9,TGFA,SPRY1
9_Member	GO Biological Processes	GO:0030111	regulation of Wnt signaling pathway	-2.56034	0	4/314	3484,6659,6662,120892	IGFBP1,SOX4,SOX9,LRRK2
9_Member	GO Biological Processes	GO:0001655	urogenital system development	-2.51629	0	4/323	6659,6662,10252,120892	SOX4,SOX9,SPRY1,LRRK2
9_Member	GO Biological Processes	GO:0030324	lung development	-2.41372	0	3/169	6662,10252,10365	SOX9,SPRY1,KLF2
9_Member	GO Biological Processes	GO:0030323	respiratory tube development	-2.38531	0	3/173	6662,10252,10365	SOX9,SPRY1,KLF2
9_Member	GO Biological Processes	GO:0060541	respiratory system development	-2.24701	0	3/194	6662,10252,10365	SOX9,SPRY1,KLF2
9_Member	GO Biological Processes	GO:0001763	morphogenesis of a branching structure	-2.2347	0	3/196	6662,10252,120892	SOX9,SPRY1,LRRK2
9_Member	GO Biological Processes	GO:0045732	positive regulation of protein catabolic process	-2.13533	0	3/213	975,6662,120892	CD81,SOX9,LRRK2
9_Member	GO Biological Processes	GO:0060560	developmental growth involved in morphogenesis	-2.05985	0	3/227	5802,6662,10252	PTPRS,SOX9,SPRY1
10_Summary	Reactome Gene Sets	R-HSA-8957275	Post-translational protein phosphorylation	-2.96718	-0.0671737	3/108	3484,3486,7857,3909	IGFBP1,IGFBP3,SCG2,LAMA3
10_Member	Reactome Gene Sets	R-HSA-8957275	Post-translational protein phosphorylation	-2.96718	-0.0671737	3/108	3484,3486,7857	IGFBP1,IGFBP3,SCG2
10_Member	Reactome Gene Sets	R-HSA-381426	Regulation of Insulin-like Growth Factor (IGF) transport and uptake by Insulin-like Growth Factor Bi	-2.78464	-0.00113813	3/125	3484,3486,7857	IGFBP1,IGFBP3,SCG2
10_Member	Canonical Pathways	M3008	NABA ECM GLYCOPROTEINS	-2.2347	0	3/196	3484,3486,3909	IGFBP1,IGFBP3,LAMA3
11_Summary	GO Biological Processes	GO:0048589	developmental growth	-2.91939	-0.0515642	6/646	2539,3484,5802,6662,10252,10365,3486,91663	G6PD,IGFBP1,PTPRS,SOX9,SPRY1,KLF2,IGFBP3,MYADM
11_Member	GO Biological Processes	GO:0048589	developmental growth	-2.91939	-0.0515642	6/646	2539,3484,5802,6662,10252,10365	G6PD,IGFBP1,PTPRS,SOX9,SPRY1,KLF2
11_Member	GO Biological Processes	GO:0016049	cell growth	-2.6824	0	5/488	2539,3484,3486,5802,6662	G6PD,IGFBP1,IGFBP3,PTPRS,SOX9
11_Member	GO Biological Processes	GO:0002064	epithelial cell development	-2.16937	0	3/207	5802,6662,91663	PTPRS,SOX9,MYADM
11_Member	GO Biological Processes	GO:0001558	regulation of cell growth	-2.11853	0	4/419	2539,3484,3486,5802	G6PD,IGFBP1,IGFBP3,PTPRS
11_Member	GO Biological Processes	GO:0048588	developmental cell growth	-2.06507	0	3/226	2539,5802,6662	G6PD,PTPRS,SOX9
12_Summary	GO Biological Processes	GO:0030155	regulation of cell adhesion	-2.83846	-0.0152786	6/670	3909,5365,5621,6662,9289,91663	LAMA3,PLXNB3,PRNP,SOX9,ADGRG1,MYADM
12_Member	GO Biological Processes	GO:0030155	regulation of cell adhesion	-2.83846	-0.0152786	6/670	3909,5365,5621,6662,9289,91663	LAMA3,PLXNB3,PRNP,SOX9,ADGRG1,MYADM
13_Summary	GO Biological Processes	GO:0090288	negative regulation of cellular response to growth factor stimulus	-2.4804	0	3/160	2817,10252,23089	GPC1,SPRY1,PEG10
13_Member	GO Biological Processes	GO:0090288	negative regulation of cellular response to growth factor stimulus	-2.4804	0	3/160	2817,10252,23089	GPC1,SPRY1,PEG10
14_Summary	KEGG Pathway	hsa05202	Transcriptional misregulation in cancer	-2.33727	0	3/180	2115,3486,8900	ETV1,IGFBP3,CCNA1
14_Member	KEGG Pathway	hsa05202	Transcriptional misregulation in cancer	-2.33727	0	3/180	2115,3486,8900	ETV1,IGFBP3,CCNA1
15_Summary	GO Biological Processes	GO:0009612	response to mechanical stimulus	-2.1868	0	3/204	476,2115,6662	ATP1A1,ETV1,SOX9
15_Member	GO Biological Processes	GO:0009612	response to mechanical stimulus	-2.1868	0	3/204	476,2115,6662	ATP1A1,ETV1,SOX9
GO analysis of upregulated genes in siCD81 cells
GroupID	Category	Term	Description	LogP	Log(q-value)	InTerm_InList	Genes	Symbols
1_Summary	GO Biological Processes	GO:0048762	mesenchymal cell differentiation	-2.28423	0	3/212	1277,8091,8482	COL1A1,HMGA2,SEMA7A
1_Member	GO Biological Processes	GO:0048762	mesenchymal cell differentiation	-2.28423	0	3/212	1277,8091,8482	COL1A1,HMGA2,SEMA7A
2_Summary	GO Biological Processes	GO:0001649	osteoblast differentiation	-2.26732	0	3/215	93,1277,8482	ACVR2B,COL1A1,SEMA7A
2_Member	GO Biological Processes	GO:0001649	osteoblast differentiation	-2.26732	0	3/215	93,1277,8482	ACVR2B,COL1A1,SEMA7A
