# Supplementary material for: Machine learning-assisted elucidation of CD81–CD44 interactions in promoting cancer stemness and extracellular vesicle integrity
Source: eLife. 2022 Oct 4;11:e82669. doi: 10.7554/eLife.82669 (PMC9581534; doi:10.7554/eLife.82669)
Supplement: Supplementary file 4. [file elife-82669-supp4.xlsx]

## Sheet: ClusterVsAdherent_Global
Significant	-LOG(@P-@value)	Difference, log2 scale (Clusterd/Adherent)	Protein	Protein ID	Entry Name	Gene	Protein Description	Symbol color	Symbol type	Symbol size	Show label	Length	sample-02	sample-03	sample-05	sample-07	sample-11	sample-14
+	3.33451	1.81928	sp|P02458|CO2A1_HUMAN	P02458	CO2A1_HUMAN	COL2A1	Collagen alpha-1(II) chain	Color2 [DarkGray]	1	4		1487	-6.45727	-4.64145	-6.74607	-4.63657	-6.62579	-5.09328
+	3.50825	1.41465	sp|P02675|FIBB_HUMAN	P02675	FIBB_HUMAN	FGB	Fibrinogen beta chain	Color2 [DarkGray]	1	4		491	-3.42336	-1.79106	-3.1941	-1.71661	-3.0808	-1.94662
+	1.20841	1.32852	sp|P02769|ALBU_BOVIN	P02769	ALBU_BOVIN	ALB	Serum albumin	Color2 [DarkGray]	1	4		607	5.65337	6.18635	5.74375	7.79208	6.11924	7.5235
+	3.41459	1.08651	sp|P02452|CO1A1_HUMAN	P02452	CO1A1_HUMAN	COL1A1	Collagen alpha-1(I) chain	Color2 [DarkGray]	1	4		1464	-3.1247	-2.07074	-3.09532	-1.92962	-2.88875	-1.84889
+	4.7477	1.03714	sp|Q16665|HIF1A_HUMAN	Q16665	HIF1A_HUMAN	HIF1A	Hypoxia-inducible factor 1-alpha	Color2 [DarkGray]	1	4		826	-3.42245	-2.37881	-3.44936	-2.46381	-3.4043	-2.32208
+	3.63952	0.92433	sp|P02751|FINC_HUMAN	P02751	FINC_HUMAN	FN1	Fibronectin	Color2 [DarkGray]	1	4		2477	2.22506	3.27614	2.34531	3.26686	2.2773	3.07767
+	1.65747	0.856242	sp|P02666|CASB_BOVIN	P02666	CASB_BOVIN	CSN2	Beta-casein	Color2 [DarkGray]	1	4		224	-7.7139	-6.95227	-7.24016	-6.60468	-7.46084	-6.28921
+	2.50343	0.8217	sp|P35318|ADML_HUMAN	P35318	ADML_HUMAN	ADM	Pro-adrenomedullin	Color2 [DarkGray]	1	4		185	-6.8869	-5.78297	-6.52367	-5.93087	-6.79136	-6.023
+	4.26462	0.795117	sp|Q99969|RARR2_HUMAN	Q99969	RARR2_HUMAN	RARRES2	Retinoic acid receptor responder protein 2	Color2 [DarkGray]	1	4		163	-4.69113	-3.87803	-4.72635	-3.83989	-4.59646	-3.91066
+	3.00587	0.789149	sp|P05019|IGF1_HUMAN	P05019	IGF1_HUMAN	IGF1	Insulin-like growth factor I	Color2 [DarkGray]	1	4		195	-4.77488	-3.92109	-4.83632	-3.86436	-4.64165	-4.09995
+	1.73564	0.64882	sp|A0A0U1RRL7|MMPOS_HUMAN	A0A0U1RRL7	MMPOS_HUMAN	MMP24OS	Protein MMP24	Color2 [DarkGray]	1	4		71	-4.10074	-3.28212	-3.68144	-3.33076	-4.2155	-3.43834
+	3.46152	0.647215	sp|O14503|BHE40_HUMAN	O14503	BHE40_HUMAN	BHLHE40	Class E basic helix-loop-helix protein 40	Color2 [DarkGray]	1	4		412	-2.04708	-1.34616	-1.86034	-1.31065	-1.97994	-1.28891
+	2.27579	0.583406	sp|P35544|UBIM_HUMAN	P35544	UBIM_HUMAN	FAU	Ubiquitin-like protein FUBI	Color2 [DarkGray]	1	4		74	-5.45931	-4.97493	-5.80384	-5.04149	-5.54496	-5.04147
+	2.29606	0.574926	sp|P22736|NR4A1_HUMAN	P22736	NR4A1_HUMAN	NR4A1	Nuclear receptor subfamily 4 group A member 1	Color2 [DarkGray]	1	4		598	-4.44197	-3.74637	-4.42595	-3.99651	-4.60705	-4.00732
+	3.22134	0.560627	sp|P02679|FIBG_HUMAN	P02679	FIBG_HUMAN	FGG	Fibrinogen gamma chain	Color2 [DarkGray]	1	4		453	-5.30633	-4.69217	-5.25519	-4.60908	-5.1624	-4.74079
+	3.38583	0.539482	sp|P20393|NR1D1_HUMAN	P20393	NR1D1_HUMAN	NR1D1	Nuclear receptor subfamily 1 group D member 1	Color2 [DarkGray]	1	4		614	-1.52803	-0.901455	-1.39501	-0.86088	-1.412	-0.954258
+	2.27361	0.533643	sp|P00742|FA10_HUMAN	P00742	FA10_HUMAN	F10	Coagulation factor X	Color2 [DarkGray]	1	4		488	-1.90032	-1.47062	-1.96552	-1.53577	-1.96684	-1.22537
+	1.83606	0.519249	sp|P69905|HBA_HUMAN	P69905	HBA_HUMAN	HBA1	Hemoglobin subunit alpha	Color2 [DarkGray]	1	4		142	-2.14162	-1.37371	-1.84107	-1.4964	-1.76609	-1.32093
+	2.07613	0.509988	sp|P53539|FOSB_HUMAN	P53539	FOSB_HUMAN	FOSB	Protein fosB	Color2 [DarkGray]	1	4		338	-2.67175	-2.23542	-2.56933	-1.96045	-2.47013	-1.98537
+	1.72822	0.506678	sp|Q9BXL8|CDCA4_HUMAN	Q9BXL8	CDCA4_HUMAN	CDCA4	Cell division cycle-associated protein 4	Color2 [DarkGray]	1	4		241	-6.61523	-6.41879	-6.97445	-6.22309	-6.96143	-6.38919
+	2.75853	0.501879	sp|P18847|ATF3_HUMAN	P18847	ATF3_HUMAN	ATF3	Cyclic AMP-dependent transcription factor ATF-3	Color2 [DarkGray]	1	4		181	-4.95757	-4.37415	-4.94677	-4.59289	-5.00515	-4.43681
+	2.79535	0.498616	sp|Q99576|T22D3_HUMAN	Q99576	T22D3_HUMAN	TSC22D3	TSC22 domain family protein 3	Color2 [DarkGray]	1	4		134	-3.98531	-3.60609	-4.05948	-3.59136	-4.06738	-3.41887
+	2.98974	0.485957	sp|P00488|F13A_HUMAN	P00488	F13A_HUMAN	F13A1	Coagulation factor XIII A chain	Color2 [DarkGray]	1	4		732	-6.16718	-5.5404	-6.13395	-5.68366	-6.08512	-5.70433
+	2.30492	0.465339	sp|P38936|CDN1A_HUMAN	P38936	CDN1A_HUMAN	CDKN1A	Cyclin-dependent kinase inhibitor 1	Color2 [DarkGray]	1	4		164	-4.075	-3.69637	-4.01064	-3.43533	-4.08482	-3.64274
+	2.31187	0.451232	sp|P17936|IBP3_HUMAN	P17936	IBP3_HUMAN	IGFBP3	Insulin-like growth factor-binding protein 3	Color2 [DarkGray]	1	4		291	-3.88511	-3.36807	-3.89549	-3.42067	-3.97579	-3.61396
+	3.00527	0.446609	sp|P23142|FBLN1_HUMAN	P23142	FBLN1_HUMAN	FBLN1	Fibulin-1	Color2 [DarkGray]	1	4		703	-5.01092	-4.53789	-5.11813	-4.59104	-4.99964	-4.65993
+	3.0217	0.4229	sp|P21246|PTN_HUMAN	P21246	PTN_HUMAN	PTN	Pleiotrophin	Color2 [DarkGray]	1	4		168	-3.71708	-3.35181	-3.82388	-3.40337	-3.75827	-3.27534
+	2.46775	0.420637	sp|Q2VYF4|LETM2_HUMAN	Q2VYF4	LETM2_HUMAN	LETM2	LETM1 domain-containing protein LETM2, mitochondrial	Color2 [DarkGray]	1	4		491	-6.94993	-6.44185	-6.85498	-6.48783	-7.00258	-6.6159
+	2.34798	0.408113	sp|P01042|KNG1_HUMAN	P01042	KNG1_HUMAN	KNG1	Kininogen-1	Color2 [DarkGray]	1	4		644	-1.88314	-1.28729	-1.79697	-1.49015	-1.76435	-1.44268
+	2.17562	0.371507	sp|Q13253|NOGG_HUMAN	Q13253	NOGG_HUMAN	NOG	Noggin	Color2 [DarkGray]	1	4		232	-5.39526	-5.06145	-5.53267	-5.01489	-5.28897	-5.02602
+	2.14058	0.366848	sp|P02655|APOC2_HUMAN	P02655	APOC2_HUMAN	APOC2	Apolipoprotein C-II	Color2 [DarkGray]	1	4		101	-4.70038	-4.24381	-4.47201	-4.26982	-4.61437	-4.1726
+	3.90754	0.366548	sp|Q16690|DUS5_HUMAN	Q16690	DUS5_HUMAN	DUSP5	Dual specificity protein phosphatase 5	Color2 [DarkGray]	1	4		384	-2.42258	-2.02797	-2.45522	-2.10109	-2.44284	-2.09194
+	2.35279	0.364202	sp|P02749|APOH_HUMAN	P02749	APOH_HUMAN	APOH	Beta-2-glycoprotein 1	Color2 [DarkGray]	1	4		345	-3.90236	-3.44522	-3.79446	-3.59909	-3.86853	-3.42843
+	5.3245	0.349675	sp|Q15582|BGH3_HUMAN	Q15582	BGH3_HUMAN	TGFBI	Transforming growth factor-beta-induced protein ig-h3	Color2 [DarkGray]	1	4		683	0.106117	0.441036	0.119533	0.46505	0.0963192	0.464909
+	3.13625	0.313282	sp|Q14511|CASL_HUMAN	Q14511	CASL_HUMAN	NEDD9	Enhancer of filamentation 1	Color2 [DarkGray]	1	4		834	-1.75868	-1.488	-1.72464	-1.43253	-1.8239	-1.44685
+	3.22568	0.294619	sp|Q5VY09|IER5_HUMAN	Q5VY09	IER5_HUMAN	IER5	Immediate early response gene 5 protein	Color2 [DarkGray]	1	4		327	-5.56959	-5.28963	-5.54397	-5.29741	-5.64307	-5.28573
+	3.37543	0.287159	sp|P31350|RIR2_HUMAN	P31350	RIR2_HUMAN	RRM2	Ribonucleoside-diphosphate reductase subunit M2	Color2 [DarkGray]	1	4		389	2.41246	2.73121	2.38081	2.65364	2.42955	2.69945
+	4.91656	0.26024	sp|P03956|MMP1_HUMAN	P03956	MMP1_HUMAN	MMP1	Interstitial collagenase	Color2 [DarkGray]	1	4		469	0.448357	0.696659	0.455863	0.729801	0.452793	0.711273
+	3.2766	-0.277337	sp|P05412|JUN_HUMAN	P05412	JUN_HUMAN	JUN	Transcription factor AP-1	Color2 [DarkGray]	1	4		331	-1.43116	-1.68716	-1.41212	-1.74348	-1.48394	-1.72859
+	2.63443	-0.32157	sp|P11926|DCOR_HUMAN	P11926	DCOR_HUMAN	ODC1	Ornithine decarboxylase	Color2 [DarkGray]	1	4		461	-2.22131	-2.54613	-2.28959	-2.51169	-2.13441	-2.55219
+	2.60808	-0.340063	sp|P12755|SKI_HUMAN	P12755	SKI_HUMAN	SKI	Ski oncogene	Color2 [DarkGray]	1	4		728	-1.76464	-2.22995	-1.90547	-2.1833	-1.85363	-2.13068
+	2.54601	-0.363814	sp|P12644|BMP4_HUMAN	P12644	BMP4_HUMAN	BMP4	Bone morphogenetic protein 4	Color2 [DarkGray]	1	4		408	-3.32472	-3.60764	-3.38361	-3.71403	-3.23552	-3.71362
+	2.10484	-0.374187	sp|Q9NZ32|ARP10_HUMAN	Q9NZ32	ARP10_HUMAN	ACTR10	Actin-related protein 10	Color2 [DarkGray]	1	4		417	2.77909	2.33746	2.65673	2.45718	2.70645	2.22507
+	3.40965	-0.380757	sp|Q8NDX6|ZN740_HUMAN	Q8NDX6	ZN740_HUMAN	ZNF740	Zinc finger protein 740	Color2 [DarkGray]	1	4		193	-2.04476	-2.51671	-2.14778	-2.4702	-2.1196	-2.4675
+	3.49978	-0.394476	sp|P49918|CDN1C_HUMAN	P49918	CDN1C_HUMAN	CDKN1C	Cyclin-dependent kinase inhibitor 1C	Color2 [DarkGray]	1	4		316	-3.34654	-3.82455	-3.38725	-3.74331	-3.3696	-3.71896
+	1.93164	-0.488818	sp|Q684P5|RPGP2_HUMAN	Q684P5	RPGP2_HUMAN	RAP1GAP2	Rap1 GTPase-activating protein 2	Color2 [DarkGray]	1	4		730	-5.26942	-5.60132	-5.08872	-5.85325	-5.16049	-5.53051
+	3.79515	-0.625735	sp|Q15327|ANKR1_HUMAN	Q15327	ANKR1_HUMAN	ANKRD1	Ankyrin repeat domain-containing protein 1	Color2 [DarkGray]	1	4		319	-1.29611	-1.90529	-1.33737	-1.86118	-1.22899	-1.97321

## Sheet: ClusterVsAdherent_phosp
Significant	-LOG(@P-@value)	Difference log2 scale (Clusterd/Adherent)	Protein	Gene	Protein Description	Mapped Genes	Mapped Proteins	Modified Peptide	Symbol color	Symbol type	Symbol size	Show label	Intensity	sample-02	sample-03	sample-05	sample-07	sample-11	sample-14
+	3.73161	2.82356	sp|P22413|ENPP1_HUMAN	ENPP1	Ectonucleotide pyrophosphatase/phosphodiesterase family member 1			n[305]DGCAGGGS[167]RGGEGGR	Color2 [DarkGray]	1	4		3.17081e+06	-4.1221	-1.05552	-3.99915	-1.69623	-4.25166	-1.15049
+	2.19555	2.43058	sp|Q9UK76|JUPI1_HUMAN	JPT1	Jupiter microtubule associated homolog 1			n[305]GVDPNS[167]RNSS[167]R	Color2 [DarkGray]	1	4		24358378	-1.24401	1.92166	-0.478705	0.905521	-0.538203	2.20364
+	3.34229	2.37065	sp|P07947|YES_HUMAN	YES1	Tyrosine-protein kinase Yes			n[305]Y[243]RPENTPEPVSTSVSHYGAEPTTVSPCPSSS[167]AK	Color2 [DarkGray]	1	4		2112556	-4.2567	-1.49111	-3.85469	-2.02573	-3.9494	-1.43198
+	2.66369	2.34289	sp|Q09666|AHNK_HUMAN	AHNAK	Neuroblast differentiation-associated protein AHNAK			n[305]FSMPS[167]LKGEGPEFDVNLSK	Color2 [DarkGray]	1	4		0	0.898304	3.35948	1.38316	2.96863	1.01645	3.99847
+	2.85654	2.29464	sp|Q8N0T1|RBIS_HUMAN	RBIS	Ribosomal biogenesis factor			n[305]NVFHIAS[167]QK	Color2 [DarkGray]	1	4		112114960	2.04406	4.79269	2.81991	4.31816	2.11256	4.7496
+	1.60258	2.24958	sp|P07550|ADRB2_HUMAN	ADRB2	Beta-2 adrenergic receptor			n[305]AY[243]GNGYSSNGNTGEQS[167]GYHVEQEK	Color2 [DarkGray]	1	4		4968452	-3.07683	0.10808	-1.05931	0.0707054	-1.6437	0.790112
+	2.80555	2.24356	sp|Q8WW12|PCNP_HUMAN	PCNP	PEST proteolytic signal-containing nuclear protein			n[305]ASAIS[167]IK	Color2 [DarkGray]	1	4		167987632	1.87119	4.04356	1.90293	3.52694	1.50195	4.43624
+	3.24579	2.2171	sp|Q96B36|AKTS1_HUMAN	AKT1S1	Proline-rich AKT1 substrate 1			n[305]S[167]LPVSVPVWGFK	Color2 [DarkGray]	1	4		184402704	2.38502	4.77771	2.77419	5.09384	3.07905	5.018
+	2.51014	2.20193	sp|P46821|MAP1B_HUMAN	MAP1B	Microtubule-associated protein 1B			n[305]DLS[167]TPGLEK	Color2 [DarkGray]	1	4		172227472	1.22921	4.40383	1.91736	3.63779	1.89718	3.60792
+	2.41368	2.18339	sp|Q9HD64|XAGE1_HUMAN	XAGE1A	X antigen family member 1			n[305]VGILHLGS[167]R	Color2 [DarkGray]	1	4		44164152	-2.16027	0.443143	-1.19932	0.00557995	-2.08136	0.660497
+	2.1665	2.17751	sp|P01100|FOS_HUMAN	FOS	Proto-oncogene c-Fos			n[305]KGS[167]S[167]SNEPSSDSLSSPTLLAL	Color2 [DarkGray]	1	4		0	-1.17333	1.306	-1.60467	0.992608	-0.207694	1.24823
+	2.22467	2.12265	sp|P11171|EPB41_HUMAN	EPB41	Protein 4.1			n[305]QAS[167]ALIDRPAPHFER	Color2 [DarkGray]	1	4		15956285	-1.08388	1.49405	-0.0986409	0.950121	-0.902857	1.83841
+	1.59154	2.0964	sp|Q9BSJ8|ESYT1_HUMAN	ESYT1	Extended synaptotagmin-1			n[305]TLYMS[167]HR	Color2 [DarkGray]	1	4		6.50555e+06	1.23749	3.23001	0.558179	3.34251	0.207136	1.7195
+	2.88868	2.0706	sp|P46821|MAP1B_HUMAN	MAP1B	Microtubule-associated protein 1B			n[305]ASVLFDTMQHHLALNRDLS[167]TPGLEK	Color2 [DarkGray]	1	4		4.48773e+06	-1.92021	0.644469	-1.49172	-0.0731125	-1.67721	0.551301
+	3.51688	2.05233	sp|Q15398|DLGP5_HUMAN	DLGAP5	Disks large-associated protein 5			n[305]HIS[167]FGGNLITFSPLQPGEF	Color2 [DarkGray]	1	4		29591546	-1.16483	0.590932	-1.09594	0.792216	-1.51897	0.994089
+	3.12012	2.05227	sp|Q12849|GRSF1_HUMAN	GRSF1	G-rich sequence factor 1			n[305]T[181]HVGSYK	Color2 [DarkGray]	1	4		205866320	2.37047	4.77053	2.86317	4.4897	2.87033	5.00056
+	2.22875	2.03846	sp|Q7Z5J4|RAI1_HUMAN	RAI1	Retinoic acid-induced protein 1			n[305]S[167]RSSSSSNASGNGGDGK	Color2 [DarkGray]	1	4		4593589	-4.18825	-1.86583	-4.45022	-3.04982	-4.76526	-2.37271
+	3.88655	2.03687	sp|Q6VY07|PACS1_HUMAN	PACS1	Phosphofurin acidic cluster sorting protein 1			n[305]LTS[167]TSAITR	Color2 [DarkGray]	1	4		27057022	0.464221	2.56001	0.724592	2.56954	0.724472	2.89434
+	2.87284	2.02561	sp|Q9UK76|JUPI1_HUMAN	JPT1	Jupiter microtubule associated homolog 1			n[305]GVDPNS[167]RNS[167]SR	Color2 [DarkGray]	1	4		7.85931e+06	-1.37738	0.979651	-0.968154	0.707494	-0.73992	1.30424
+	1.80042	2.01353	sp|Q14161|GIT2_HUMAN	GIT2	ARF GTPase-activating protein GIT2			n[305]QAT[181]T[181]NVYQVQTGSEYTDTSNHSSLK	Color2 [DarkGray]	1	4		787798	-3.2321	-1.8375	-4.63739	-1.5667	-3.10453	-1.52923
+	3.31335	2.00366	sp|Q12849|GRSF1_HUMAN	GRSF1	G-rich sequence factor 1			n[305]THVGS[167]YK	Color2 [DarkGray]	1	4		69365248	1.78075	4.04624	2.19476	3.80387	2.15543	4.2918
+	2.51433	1.99294	sp|Q14161|GIT2_HUMAN	GIT2	ARF GTPase-activating protein GIT2			n[305]QAT[181]TNVYQVQTGSEYTDTSNHSS[167]LK	Color2 [DarkGray]	1	4		964364	-4.78623	-2.3977	-3.90818	-2.45331	-4.08724	-1.95181
+	2.97307	1.97156	sp|O14777|NDC80_HUMAN	NDC80	Kinetochore protein NDC80 homolog			n[305]EKPTFGKLS[167]INKPTSERK	Color2 [DarkGray]	1	4		3.57866e+06	-0.44855	1.59091	-0.242746	1.29898	-0.267559	2.06594
+	2.4509	1.96618	sp|Q9UK76|JUPI1_HUMAN	JPT1	Jupiter microtubule associated homolog 1			n[305]GVDPNS[167]R	Color2 [DarkGray]	1	4		128450808	1.57044	4.1899	2.19609	3.43863	2.14411	4.18065
+	2.57805	1.94709	sp|Q09666|AHNK_HUMAN	AHNAK	Neuroblast differentiation-associated protein AHNAK			n[305]LPDM[147]S[167]VK	Color2 [DarkGray]	1	4		4.76395e+06	-1.71311	0.553771	-0.877679	0.420327	-1.30705	0.969326
+	2.97946	1.94383	sp|O14950|ML12B_HUMAN	MYL12B	Myosin regulatory light chain 12B	MYL12A, MYL9	sp|P19105|ML12A_HUMAN, sp|P24844|MYL9_HUMAN	n[305]RPQRAT[181]S[167]NVFAMFDQSQIQEFK	Color2 [DarkGray]	1	4		4.68783e+06	-0.86196	1.27035	-0.917109	1.11827	-0.253877	1.40991
+	2.43901	1.94196	sp|Q09666|AHNK_HUMAN	AHNAK	Neuroblast differentiation-associated protein AHNAK			n[305]GGLKGS[167]EVGFHGAAPDISVK	Color2 [DarkGray]	1	4		88603376	-0.944438	1.07619	-0.473782	0.819792	-0.730494	1.78118
+	2.70053	1.92993	sp|Q96B36|AKTS1_HUMAN	AKT1S1	Proline-rich AKT1 substrate 1			n[305]SLPVS[167]VPVWGFK	Color2 [DarkGray]	1	4		752908224	2.349	4.67976	3.01715	4.78379	3.21039	4.90278
+	1.55277	1.92598	sp|Q16644|MAPK3_HUMAN	MAPKAPK3	MAP kinase-activated protein kinase 3			n[305]ETTQNALQTPCYTPYY[243]VAPEVLGPEK	Color2 [DarkGray]	1	4		7.52976e+06	-0.646315	2.1614	1.0591	1.51836	-0.406359	2.1046
+	2.23702	1.92347	sp|Q9ULF5|S39AA_HUMAN	SLC39A10	Zinc transporter ZIP10			n[305]NNAIIS[167]LRK	Color2 [DarkGray]	1	4		6.54751e+06	-1.59153	0.686281	-1.17095	0.133425	-0.982966	1.20527
+	2.39623	1.90572	sp|Q09666|AHNK_HUMAN	AHNAK	Neuroblast differentiation-associated protein AHNAK			n[305]FNFS[167]GSK	Color2 [DarkGray]	1	4		61266076	-0.490871	1.55028	0.189176	1.28772	-0.751192	1.82626
+	2.53092	1.89961	sp|O43719|HTSF1_HUMAN	HTATSF1	HIV Tat-specific factor 1			n[305]ARHFS[167]EHPSTS[167]K	Color2 [DarkGray]	1	4		1.46489e+06	-2.56885	-0.293854	-1.96739	-0.86281	-2.76217	-0.442903
+	3.21165	1.88036	sp|Q09666|AHNK_HUMAN	AHNAK	Neuroblast differentiation-associated protein AHNAK			n[305]TPSFGISAPQVS[167]IPDVNVNLK	Color2 [DarkGray]	1	4		63664384	1.06121	2.69475	0.850992	2.70265	1.07704	3.2329
+	2.18206	1.88016	sp|Q6NYC8|PPR18_HUMAN	PPP1R18	Phostensin			n[305]RRQEEAS[167]VR	Color2 [DarkGray]	1	4		9123071	-1.53126	0.877769	-0.534407	0.618029	-0.76831	1.31071
+	2.64144	1.87557	sp|Q14847|LASP1_HUMAN	LASP1	LIM and SH3 domain protein 1			n[305]DSQDGS[167]SYRRPLEQQQPHHIPTSAPVYQQPQQQPVAQSYGGYK	Color2 [DarkGray]	1	4		5598174	-0.371967	1.61683	0.0691752	1.45223	-0.0282822	2.22656
+	2.76786	1.87033	sp|Q9UPU5|UBP24_HUMAN	USP24	Ubiquitin carboxyl-terminal hydrolase 24			n[305]QT[181]SRQMS[167]LCGTPEK	Color2 [DarkGray]	1	4		6.14315e+06	-0.921886	1.1096	-0.550106	0.671148	-0.948988	1.40927
+	2.75337	1.86772	sp|P17844|DDX5_HUMAN	DDX5	Probable ATP-dependent RNA helicase DDX5			n[305]GYSS[167]LLK	Color2 [DarkGray]	1	4		131465064	2.66019	4.66296	2.88955	4.10763	2.35539	4.73769
+	3.09108	1.86633	sp|Q9NUQ8|ABCF3_HUMAN	ABCF3	ATP-binding cassette sub-family F member 3			n[305]REQS[167]STVNAK	Color2 [DarkGray]	1	4		12559467	-0.19544	2.03031	0.316162	1.79488	0.304075	2.19859
+	2.61336	1.86347	sp|P82979|SARNP_HUMAN	SARNP	SAP domain-containing ribonucleoprotein			n[305]FGLNVSS[167]ISR	Color2 [DarkGray]	1	4		57717340	0.638094	2.66541	0.870938	2.12777	0.73607	3.04234
+	1.85684	1.86318	sp|Q9NYV4|CDK12_HUMAN	CDK12	Cyclin-dependent kinase 12			n[305]TQVS[167]VTAAIPHLK	Color2 [DarkGray]	1	4		4601080	-2.88397	0.199054	-1.85676	-0.600373	-1.69427	-0.444163
+	2.50481	1.85407	sp|P21399|ACOC_HUMAN	ACO1	Cytoplasmic aconitate hydratase			n[305]EFNSYGS[167]RR	Color2 [DarkGray]	1	4		63505104	1.69434	3.93202	2.02047	3.38366	2.24914	4.21046
+	2.31488	1.84607	sp|Q9UBU9|NXF1_HUMAN	NXF1	Nuclear RNA export factor 1			n[305]RGDT[181]WHDRDR	Color2 [DarkGray]	1	4		16122250	-0.362727	2.05054	0.350263	1.48006	0.276591	2.27175
+	2.19832	1.84024	sp|Q09666|AHNK_HUMAN	AHNAK	Neuroblast differentiation-associated protein AHNAK			n[305]SPQIS[167]MSDIDLNLK	Color2 [DarkGray]	1	4		30874050	-0.091959	2.11297	0.31271	1.49521	0.440022	2.57331
+	2.06107	1.83831	sp|Q8N488|RYBP_HUMAN	RYBP	RING1 and YY1-binding protein	YAF2	sp|Q8IY57|YAF2_HUMAN	n[305]GTS[167]TRKPR	Color2 [DarkGray]	1	4		9539473	-0.430709	1.49668	-0.0290952	0.942026	-0.432224	2.1842
+	3.28191	1.82536	sp|Q9NQW6|ANLN_HUMAN	ANLN	Anillin			n[305]FSSASGAS[167]AR	Color2 [DarkGray]	1	4		26411336	0.472972	2.38149	0.435889	1.92948	0.448248	2.52222
+	2.93648	1.82393	sp|P23588|IF4B_HUMAN	EIF4B	Eukaryotic translation initiation factor 4B			n[305]AFGS[167]GYR	Color2 [DarkGray]	1	4		137470880	2.74625	4.62344	2.78499	4.10823	2.50268	4.77403
+	3.06516	1.82153	sp|Q8IVF2|AHNK2_HUMAN	AHNAK2	Protein AHNAK2			n[305]VQM[147]PS[167]FK	Color2 [DarkGray]	1	4		6178899	-1.08518	0.701491	-0.999105	0.393176	-1.55347	0.732173
+	2.25155	1.81691	sp|Q562F6|SGO2_HUMAN	SGO2	Shugoshin 2	FOS	sp|P01100|FOS_HUMAN	n[305]AQS[167]IGRR	Color2 [DarkGray]	1	4		3.11608e+06	-2.74721	-0.156359	-2.03756	-0.808028	-1.88189	-0.251547
+	2.41357	1.80927	sp|O00571|DDX3X_HUMAN	DDX3X	ATP-dependent RNA helicase DDX3X			n[305]QS[167]S[167]GASSSSFSSSR	Color2 [DarkGray]	1	4		1.86023e+06	-2.21741	-0.275352	-2.15931	-1.04519	-2.5301	-0.158472
+	2.37305	1.80416	sp|P51812|KS6A3_HUMAN	RPS6KA3	Ribosomal protein S6 kinase alpha-3	RPS6KA1	sp|Q15418|KS6A1_HUMAN	n[305]QLRAENGLLMT[181]PCYTANFVAPEVLK	Color2 [DarkGray]	1	4		0	-0.618255	0.925153	-0.627677	1.11541	-0.268637	1.85735
+	1.81194	1.80381	sp|Q8WW12|PCNP_HUMAN	PCNP	PEST proteolytic signal-containing nuclear protein			n[305]KASAIS[167]IK	Color2 [DarkGray]	1	4		3.05168e+06	-1.34674	0.200015	-1.48403	-0.281529	-1.4409	1.22127
+	2.75537	1.78609	sp|Q9UHB6|LIMA1_HUMAN	LIMA1	LIM domain and actin-binding protein 1		rev_sp|Q12934|BFSP1_HUMAN	n[305]LSETS[167]IK	Color2 [DarkGray]	1	4		30458846	1.60406	3.77637	2.17001	3.3423	1.9176	3.93126
+	2.5607	1.77689	sp|O43719|HTSF1_HUMAN	HTATSF1	HIV Tat-specific factor 1			n[305]RSDS[167]VS[167]ASER	Color2 [DarkGray]	1	4		11154960	-2.40898	-0.0906677	-2.0614	-0.494493	-1.58768	-0.142241
+	2.68405	1.77476	sp|O00571|DDX3X_HUMAN	DDX3X	ATP-dependent RNA helicase DDX3X			n[305]QSSGASSSS[167]FSSSR	Color2 [DarkGray]	1	4		35867488	-0.825211	1.28835	-0.260625	0.839659	-0.645887	1.46455
+	2.73755	1.77388	sp|Q14331|FRG1_HUMAN	FRG1	Protein FRG1			n[305]KFQS[167]FQDHK	Color2 [DarkGray]	1	4		11290892	0.273191	2.27287	0.679594	1.86141	0.449928	2.59007
+	3.08616	1.76936	sp|Q12849|GRSF1_HUMAN	GRSF1	G-rich sequence factor 1			n[305]GCGCNCS[167]SCRR	Color2 [DarkGray]	1	4		2.84916e+06	-1.92043	-0.287217	-2.0093	-0.590742	-2.35178	-0.09548
+	2.36864	1.76845	sp|Q9Y6M5|ZNT1_HUMAN	SLC30A1	Zinc transporter 1			n[305]STRPGSSDINVAPGEQGPDQEETNTLVANT[181]SNSNGLK	Color2 [DarkGray]	1	4		4.89778e+06	-2.0686	0.12674	-1.27417	-0.228275	-1.61175	0.452366
+	3.54089	1.7646	sp|Q70E73|RAPH1_HUMAN	RAPH1	Ras-associated and pleckstrin homology domains-containing protein 1			n[305]GLS[167]SSSNR	Color2 [DarkGray]	1	4		15041353	0.197779	2.30155	0.234696	1.99513	0.489509	1.9191
+	2.85364	1.76344	sp|O60353|FZD6_HUMAN	FZD6	Frizzled-6			n[305]VLQES[167]CEFFLK	Color2 [DarkGray]	1	4		37377168	1.458	3.3864	1.58527	2.8046	1.34391	3.4865
+	1.9076	1.75862	sp|Q0JRZ9|FCHO2_HUMAN	FCHO2	F-BAR domain only protein 2			n[305]RKT[181]FALPGIIK	Color2 [DarkGray]	1	4		606843	-3.78527	-1.53016	-2.91775	-2.30185	-3.78527	-1.3804
+	3.58464	1.75112	sp|Q5T5Y3|CAMP1_HUMAN	CAMSAP1	Calmodulin-regulated spectrin-associated protein 1			n[305]S[167]VHREES[167]CSDSGTK	Color2 [DarkGray]	1	4		4513286	-1.10924	0.876606	-0.848649	0.512572	-1.03046	0.875832
+	3.03787	1.74726	sp|Q14103|HNRPD_HUMAN	HNRNPD	Heterogeneous nuclear ribonucleoprotein D0			n[305]RGGHQNS[167]YKPY	Color2 [DarkGray]	1	4		8562950	-0.882425	1.00904	-0.548554	0.767343	-0.672075	1.36235
+	2.78475	1.74405	sp|Q01804|OTUD4_HUMAN	OTUD4	OTU domain-containing protein 4			n[305]QFYNQTYGS[167]RK	Color2 [DarkGray]	1	4		148157728	1.95603	3.88677	2.19113	3.57675	2.35244	4.26823
+	2.60769	1.74008	sp|O00571|DDX3X_HUMAN	DDX3X	ATP-dependent RNA helicase DDX3X			n[305]QSSGASS[167]SSFSSSR	Color2 [DarkGray]	1	4		42160720	-0.172182	1.8648	0.371916	1.41814	-0.0502157	2.0868
+	3.34283	1.73879	sp|P16383|GCFC2_HUMAN	GCFC2	Intron Large complex component GCFC2			n[305]VWAS[167]SRR	Color2 [DarkGray]	1	4		8697837	-1.2061	0.709139	-1.12566	0.252793	-1.15429	0.768375
+	2.75066	1.71554	sp|Q9BSJ6|PIMRE_HUMAN	PIMREG	Protein PIMREG			n[305]EHHRLS[167]VR	Color2 [DarkGray]	1	4		45056548	0.418146	2.41376	0.980338	2.14262	0.725778	2.71449
+	2.41289	1.71508	sp|Q09666|AHNK_HUMAN	AHNAK	Neuroblast differentiation-associated protein AHNAK		rev_sp|A4FU69|EFCB5_HUMAN	n[305]ISGPS[167]IK	Color2 [DarkGray]	1	4		464958624	1.53655	3.26877	1.94491	2.9929	1.05817	3.4232
+	2.58819	1.71393	sp|O60869|EDF1_HUMAN	EDF1	Endothelial differentiation-related factor 1			n[305]RGEDVETS[167]KK	Color2 [DarkGray]	1	4		8584564	-0.525881	1.46176	-0.0538793	1.05953	-0.23477	1.80596
+	1.50102	1.70853	sp|O94901|SUN1_HUMAN	SUN1	SUN domain-containing protein 1			n[305]TQRVDDPQDVFKPTTS[167]RLK	Color2 [DarkGray]	1	4		5813878	-0.542141	1.59764	0.300256	0.580412	-0.682563	2.0231
+	1.99721	1.70376	sp|P55085|PAR2_HUMAN	F2RL1	Proteinase-activated receptor 2		rev_sp|Q5W0Q7|USPL1_HUMAN	n[305]GRS[167]LIGK	Color2 [DarkGray]	1	4		151921232	0.245724	2.25789	1.12176	1.8739	0.408016	2.75498
+	2.95303	1.69821	sp|Q16539|MK14_HUMAN	MAPK14	Mitogen-activated protein kinase 14			n[305]HTDDEMT[181]GY[243]VATR	Color2 [DarkGray]	1	4		103734200	-0.602202	1.14497	-0.631936	0.673695	-0.687168	1.35466
+	2.97399	1.6972	sp|O43719|HTSF1_HUMAN	HTATSF1	HIV Tat-specific factor 1			n[305]HFS[167]EHPS[167]TSK	Color2 [DarkGray]	1	4		5.35154e+06	-1.95545	0.175416	-1.35635	0.000597	-1.41426	0.189515
+	2.345	1.69643	sp|Q96KN1|LRAT2_HUMAN	LRATD2	Protein LRATD2			n[305]LTHLS[167]YK	Color2 [DarkGray]	1	4		26100068	-0.514805	1.28796	-0.0606542	0.920264	-0.511992	1.79361
+	2.08782	1.69298	sp|P82979|SARNP_HUMAN	SARNP	SAP domain-containing ribonucleoprotein			n[305]FGLNVSS[167]ISRK	Color2 [DarkGray]	1	4		22496544	-0.239892	1.89701	0.511961	1.2806	0.0157766	2.18919
+	3.17596	1.69097	sp|Q8TF76|HASP_HUMAN	HASPIN	Serine/threonine-protein kinase haspin			n[305]ASFS[167]FHK	Color2 [DarkGray]	1	4		5258323	-1.32137	0.54407	-0.819767	0.426592	-1.27547	0.685628
+	3.59163	1.68901	sp|O00571|DDX3X_HUMAN	DDX3X	ATP-dependent RNA helicase DDX3X			n[305]QSSGASSSSFSSSRAS[167]SSR	Color2 [DarkGray]	1	4		17985960	-2.04288	-0.27171	-1.90223	-0.368414	-1.75937	0.00268459
+	2.66818	1.68292	sp|Q86WR7|PRSR2_HUMAN	PROSER2	Proline and serine-rich protein 2			n[305]AAVS[167]VQER	Color2 [DarkGray]	1	4		22498066	1.03498	2.49505	1.12903	2.37155	0.611981	2.95814
+	2.31873	1.68253	sp|P55210|CASP7_HUMAN	CASP7	Caspase-7			n[305]SSFVPSLFS[167]K	Color2 [DarkGray]	1	4		0	0.14059	1.59602	-0.131609	1.15854	-0.173551	2.12845
+	1.79187	1.6785	sp|Q13433|S39A6_HUMAN	SLC39A6	Zinc transporter ZIP6			n[305]GAHRPEHAS[167]GRR	Color2 [DarkGray]	1	4		1.2569e+06	-2.98413	-0.502086	-1.90827	-1.23855	-2.23711	-0.35338
+	1.45544	1.67727	sp|Q6UWI4|SHSA2_HUMAN	SHISA2	Protein shisa-2 homolog			n[305]GS[167]S[167]SRQSSTAASSSSSANSGAR	Color2 [DarkGray]	1	4		1.04863e+06	-3.09493	-2.75899	-4.74381	-2.30531	-4.40582	-2.14846
+	3.25764	1.67707	sp|Q9NQW6|ANLN_HUMAN	ANLN	Anillin			n[305]LEATAASS[167]VK	Color2 [DarkGray]	1	4		31616538	-0.226281	1.57254	-0.0820146	1.1987	-0.209008	1.74267
+	2.02871	1.67693	sp|P16070|CD44_HUMAN	CD44	CD44 antigen			n[305]KPSGLNGEAS[167]K	Color2 [DarkGray]	1	4		146489440	-1.60973	0.482991	-0.576518	0.242872	-1.21712	0.901556
+	2.60436	1.67361	sp|O00213|APBB1_HUMAN	APBB1	Amyloid-beta A4 precursor protein-binding family B member 1			n[305]RAAT[181]AHRDQNR	Color2 [DarkGray]	1	4		2.58685e+06	-1.4547	0.343399	-0.85475	0.267395	-1.28655	0.814013
+	2.36706	1.67237	sp|Q6XZF7|DNMBP_HUMAN	DNMBP	Dynamin-binding protein			n[305]LNIHS[167]IIKK	Color2 [DarkGray]	1	4		6.56916e+06	0.308056	1.92296	0.662916	1.71525	0.196086	2.54597
+	2.36462	1.66118	sp|O00425|IF2B3_HUMAN	IGF2BP3	Insulin-like growth factor 2 mRNA-binding protein 3	IGF2BP2	sp|Q9Y6M1|IF2B2_HUMAN	n[305]FAGAS[167]IK	Color2 [DarkGray]	1	4		11945701	-0.692219	1.55381	0.0713229	1.16045	-0.00269699	1.64568
+	2.69248	1.65844	sp|Q8IVF2|AHNK2_HUMAN	AHNAK2	Protein AHNAK2			n[305]VQMPS[167]FK	Color2 [DarkGray]	1	4		12134463	-0.763472	0.945358	-0.366621	0.731335	-1.08856	1.07998
+	1.43886	1.65677	sp|P42167|LAP2B_HUMAN	TMPO	Lamina-associated polypeptide 2, isoforms beta/gamma			n[305]EMFPYEASTPTGISAS[167]CRRPIK	Color2 [DarkGray]	1	4		56550228	1.65728	3.71974	2.90515	3.14863	1.63632	4.30069
+	2.4239	1.65628	sp|Q8WW12|PCNP_HUMAN	PCNP	PEST proteolytic signal-containing nuclear protein			n[305]DTPTSAGPNS[167]FNK	Color2 [DarkGray]	1	4		19135602	0.57089	2.47968	1.03967	1.97437	0.641692	2.76704
+	3.1621	1.65283	sp|Q14699|RFTN1_HUMAN	RFTN1	Raftlin			n[305]FS[167]REEM[147]HNR	Color2 [DarkGray]	1	4		19916610	-0.0510674	1.65583	0.349488	1.62704	-0.225988	1.74806
+	2.19411	1.65264	sp|P68363|TBA1B_HUMAN	TUBA1B	Tubulin alpha-1B chain	TUBA1A, TUBA3C, TUBA3D, TUBA3E, TUBA4A	sp|P0DPH7|TBA3C_HUMAN, sp|P0DPH8|TBA3D_HUMAN, sp|P68366|TBA4A_HUMAN, sp|Q6PEY2|TBA3E_HUMAN, sp|Q71U36|TBA1A_HUMAN	n[305]AY[243]HEQLSVAEITNACFEPANQMVK	Color2 [DarkGray]	1	4		34101840	-0.610411	1.40168	-0.374867	0.613191	-0.342703	1.61508
+	1.7513	1.6508	sp|O94901|SUN1_HUMAN	SUN1	SUN domain-containing protein 1			n[305]VDDPQDVFKPTTS[167]RLK	Color2 [DarkGray]	1	4		12179819	0.888564	2.85108	1.30679	1.85846	0.673394	3.1116
+	2.37271	1.64934	sp|Q9UN86|G3BP2_HUMAN	G3BP2	Ras GTPase-activating protein-binding protein 2			n[305]AFS[167]WASVTSK	Color2 [DarkGray]	1	4		347487	-3.91859	-2.35085	-4.627	-2.76083	-3.86271	-2.34859
+	4.11512	1.64421	sp|O60285|NUAK1_HUMAN	NUAK1	NUAK family SNF1-like kinase 1			n[305]VTS[167]HSLSCR	Color2 [DarkGray]	1	4		14245789	-0.679989	1.19451	-0.461803	0.933855	-0.562082	1.1004
+	2.06645	1.64351	sp|P17844|DDX5_HUMAN	DDX5	Probable ATP-dependent RNA helicase DDX5			n[305]FGGS[167]RAGPLSGK	Color2 [DarkGray]	1	4		30937946	1.48365	3.08982	1.84342	2.84482	1.59498	3.91793
+	3.67322	1.64173	sp|Q9GZR7|DDX24_HUMAN	DDX24	ATP-dependent RNA helicase DDX24			n[305]ALS[167]FLGFSAPTPIQALTLAPAIR	Color2 [DarkGray]	1	4		0	-4.32133	-2.41814	-3.91657	-2.56765	-4.19919	-2.52611
+	2.67934	1.63772	sp|P17844|DDX5_HUMAN	DDX5	Probable ATP-dependent RNA helicase DDX5			n[305]GY[243]SSLLK	Color2 [DarkGray]	1	4		24334062	-1.3905	0.724815	-0.9329	0.193166	-0.952487	0.719282
+	3.14413	1.6371	sp|P51178|PLCD1_HUMAN	PLCD1	1-phosphatidylinositol 4,5-bisphosphate phosphodiesterase delta-1			n[305]LQHWIHS[167]CLRK	Color2 [DarkGray]	1	4		4374323	-1.06353	0.435102	-0.83883	0.481769	-1.26635	0.825728
+	2.22555	1.63093	sp|P78344|IF4G2_HUMAN	EIF4G2	Eukaryotic translation initiation factor 4 gamma 2	OSMR	sp|Q99650|OSMR_HUMAN	n[305]SSILS[167]LIK	Color2 [DarkGray]	1	4		55451964	2.16384	3.72068	2.24268	3.31337	2.08781	4.35308
+	2.3613	1.62818	sp|O43491|E41L2_HUMAN	EPB41L2	Band 4.1-like protein 2			n[305]HQAS[167]ISELK	Color2 [DarkGray]	1	4		23312444	-0.577274	1.37586	0.1414	1.20843	-0.0528154	1.81157
+	2.09044	1.62812	sp|Q9BQ65|USB1_HUMAN	USB1	U6 snRNA phosphodiesterase			n[305]T[181]RPGDGSHRR	Color2 [DarkGray]	1	4		474909	-3.04106	-0.937769	-2.73014	-1.73702	-2.54797	-0.760028
+	1.32378	1.62754	sp|Q8IVF2|AHNK2_HUMAN	AHNAK2	Protein AHNAK2			n[305]LQMPS[167]FK	Color2 [DarkGray]	1	4		1.97319e+06	-4.84871	-2.46413	-3.09082	-2.88717	-4.34931	-2.0549
+	2.52387	1.62625	sp|O14908|GIPC1_HUMAN	GIPC1	PDZ domain-containing protein GIPC1			n[305]S[167]AGGRPGSGPQLGTGR	Color2 [DarkGray]	1	4		43412448	-0.38957	1.17193	-0.318446	0.750473	-0.850185	1.39814
+	2.98079	1.62448	sp|O96013|PAK4_HUMAN	PAK4	Serine/threonine-protein kinase PAK 4			n[305]EGSGGPQES[167]SRDK	Color2 [DarkGray]	1	4		7.0139e+06	-0.284705	1.42813	-0.0469489	1.34225	0.0814953	1.85291
+	1.96789	1.62439	sp|P20290|BTF3_HUMAN	BTF3	Transcription factor BTF3			n[305]KLQFS[167]LKK	Color2 [DarkGray]	1	4		6309001	-0.577222	1.33289	0.307197	1.01184	-0.447674	1.81076
+	2.26897	1.62042	sp|Q6IQ49|SDE2_HUMAN	SDE2	Replication stress response regulator SDE2			n[305]S[167]QTDRGASAGK	Color2 [DarkGray]	1	4		6106722	-0.679343	0.982744	-0.182809	0.752906	-0.694312	1.56915
+	1.71954	1.61599	sp|P46013|KI67_HUMAN	MKI67	Proliferation marker protein Ki-67			n[305]LYES[167]VKK	Color2 [DarkGray]	1	4		8192199	-1.67744	0.553961	-0.599225	0.0618896	-0.92232	1.03314
+	1.9564	1.61492	sp|O14950|ML12B_HUMAN	MYL12B	Myosin regulatory light chain 12B	MYL12A, MYL9	sp|P19105|ML12A_HUMAN, sp|P24844|MYL9_HUMAN	n[305]ATS[167]NVFAMFDQSQIQEFK	Color2 [DarkGray]	1	4		278674	-5.00742	-3.23591	-5.1274	-4.10788	-4.963	-2.90926
+	3.10406	1.61083	sp|Q8IVF2|AHNK2_HUMAN	AHNAK2	Protein AHNAK2			n[305]LQM[147]PS[167]FK	Color2 [DarkGray]	1	4		3.68729e+06	-1.26401	0.256315	-1.0454	0.201747	-1.55814	0.506866
+	2.42088	1.60706	sp|O15027|SC16A_HUMAN	SEC16A	Protein transport protein Sec16A			n[305]EVS[167]QHFNQAPGDLPAAGGPPSGAM[147]PFYNPAQLAQACATSGSSR	Color2 [DarkGray]	1	4		5.44282e+06	-2.85534	-1.43033	-2.89317	-1.79322	-3.43259	-1.13635
+	2.16215	1.6064	sp|Q09666|AHNK_HUMAN	AHNAK	Neuroblast differentiation-associated protein AHNAK			n[305]FNFSGS[167]K	Color2 [DarkGray]	1	4		6.81004e+06	-1.76985	0.0361109	-1.08625	-0.296782	-1.78285	0.440927
+	3.31356	1.60596	sp|Q14498|RBM39_HUMAN	RBM39	RNA-binding protein 39			n[305]IGLPHS[167]IK	Color2 [DarkGray]	1	4		756056704	-0.276176	1.41279	-0.116642	1.10398	-0.31859	1.5897
+	3.53251	1.59967	sp|P26583|HMGB2_HUMAN	HMGB2	High mobility group protein B2			n[305]GPGRPTGS[167]K	Color2 [DarkGray]	1	4		27397578	0.127159	1.82233	0.322094	1.65552	0.299956	2.07036
+	3.2919	1.59925	sp|Q09666|AHNK_HUMAN	AHNAK	Neuroblast differentiation-associated protein AHNAK			n[305]MPFLSISS[167]PK	Color2 [DarkGray]	1	4		316305312	2.13696	4.00828	2.20018	3.47624	2.15064	3.80099
+	2.07123	1.59796	sp|O94901|SUN1_HUMAN	SUN1	SUN domain-containing protein 1			n[305]VDDPQDVFKPT[181]TSRLK	Color2 [DarkGray]	1	4		14432907	0.733247	2.48368	0.956645	1.74653	0.524024	2.77758
+	3.07228	1.59793	sp|P12270|TPR_HUMAN	TPR	Nucleoprotein TPR			n[305]GIAS[167]TSDPPTANIKPTPVVSTPSK	Color2 [DarkGray]	1	4		7534446	-1.61242	-0.0792284	-1.47543	0.0525713	-1.30091	0.431694
+	3.36682	1.5967	sp|Q641Q2|WAC2A_HUMAN	WASHC2A	WASH complex subunit 2A	WASHC2C	sp|Q9Y4E1|WAC2C_HUMAN	n[305]T[181]VLSLFDEEEDK	Color2 [DarkGray]	1	4		92420680	0.398104	2.22566	0.505377	2.27405	0.812445	2.00632
+	3.39903	1.59524	sp|Q9UBW8|CSN7A_HUMAN	COPS7A	COP9 signalosome complex subunit 7a		rev_sp|P43004|EAA2_HUMAN	n[305]GLRGS[167]AK	Color2 [DarkGray]	1	4		74274504	3.74566	5.45118	4.09066	5.52495	4.09894	5.74486
+	2.47422	1.59358	sp|Q09666|AHNK_HUMAN	AHNAK	Neuroblast differentiation-associated protein AHNAK			n[305]VSAPEVS[167]VGHK	Color2 [DarkGray]	1	4		71668800	-0.209661	1.48039	0.186758	1.19377	-0.117519	1.96616
+	1.7342	1.59353	sp|P02751|FINC_HUMAN	FN1	Fibronectin			n[305]T[181]NTNVNCPIECFMPLDVQADREDSRE	Color2 [DarkGray]	1	4		4780838	-1.70794	0.861702	-0.583853	0.520454	-0.429119	0.677516
+	2.9881	1.59301	sp|P55196|AFAD_HUMAN	AFDN	Afadin			n[305]EGVIQNFKRT[181]LS[167]K	Color2 [DarkGray]	1	4		10721665	-0.970927	0.718346	-0.689506	0.456646	-0.915018	1.02857
+	1.59141	1.59195	sp|Q99590|SCAFB_HUMAN	SCAF11	Protein SCAF11			n[305]KQTSGT[181]SNTRGSR	Color2 [DarkGray]	1	4		4.60503e+06	-1.38248	0.153304	-1.08661	-0.565583	-1.99731	0.721722
+	2.77351	1.59191	sp|Q5TDH0|DDI2_HUMAN	DDI2	Protein DDI1 homolog 2			n[305]IDFSSIAVPGTSS[167]PR	Color2 [DarkGray]	1	4		21045250	-4.97797	-2.8428	-4.42286	-3.31625	-4.62813	-3.09418
+	4.40477	1.58774	sp|Q5SVZ6|ZMYM1_HUMAN	ZMYM1	Zinc finger MYM-type protein 1			n[305]SVDLGNS[167]DNM[147]FFPTSTEEQYK	Color2 [DarkGray]	1	4		1.53268e+06	-2.45428	-0.899166	-2.61449	-0.88474	-2.33886	-0.860512
+	3.4785	1.58723	sp|Q9Y6A5|TACC3_HUMAN	TACC3	Transforming acidic coiled-coil-containing protein 3			n[305]SSVLRVS[167]QK	Color2 [DarkGray]	1	4		48316956	-0.557936	1.11132	-0.21613	1.02798	-0.54108	1.30724
+	2.72206	1.58722	sp|Q96EK7|F120B_HUMAN	FAM120B	Constitutive coactivator of peroxisome proliferator-activated receptor gamma			n[305]T[181]GSGYSR	Color2 [DarkGray]	1	4		35117796	0.574092	2.33129	0.897167	1.91716	0.585875	2.57035
+	1.95497	1.58396	sp|O95071|UBR5_HUMAN	UBR5	E3 ubiquitin-protein ligase UBR5			n[305]GS[167]GLLGSQPQPVIPASVIPEELISQAQVVLQGK	Color2 [DarkGray]	1	4		310300	-5.30818	-2.87205	-4.43247	-3.18547	-4.18084	-3.1121
+	2.64167	1.58335	sp|Q13523|PRP4B_HUMAN	PRPF4B	Serine/threonine-protein kinase PRP4 homolog			n[305]WSPT[181]RRR	Color2 [DarkGray]	1	4		4.5509e+06	-1.56569	0.352112	-0.934325	0.086009	-1.24879	0.563141
+	2.27407	1.58124	sp|Q07890|SOS2_HUMAN	SOS2	Son of sevenless homolog 2			n[305]RELS[167]HPPLYR	Color2 [DarkGray]	1	4		34096972	0.652263	2.96161	1.32392	2.2352	1.08359	2.60668
+	2.50744	1.58056	sp|Q5M775|CYTSB_HUMAN	SPECC1	Cytospin-B			n[305]SFDLGRPGGAGQNIS[167]VHK	Color2 [DarkGray]	1	4		6.50283e+06	-0.584451	1.40239	0.13661	1.15674	-0.125547	1.60916
+	1.54743	1.57817	sp|Q9P242|NYAP2_HUMAN	NYAP2	Neuronal tyrosine-phosphorylated phosphoinositide-3-kinase adapter 2			n[305]SLTPLS[167]LK	Color2 [DarkGray]	1	4		721287	-4.04955	-1.8257	-2.79156	-1.87865	-2.80352	-1.20578
+	2.91961	1.57681	sp|Q2NL82|TSR1_HUMAN	TSR1	Pre-rRNA-processing protein TSR1 homolog			n[305]HRAS[167]QLRK	Color2 [DarkGray]	1	4		88094728	3.43886	5.31979	3.83806	4.94365	3.70741	5.45133
+	2.53674	1.57544	sp|Q9BV36|MELPH_HUMAN	MLPH	Melanophilin			n[305]RKFS[167]NS[167]LK	Color2 [DarkGray]	1	4		16853176	-0.434295	1.4311	0.279811	1.27175	-0.171273	1.69771
+	1.93739	1.56795	sp|Q8IYW5|RN168_HUMAN	RNF168	E3 ubiquitin-protein ligase RNF168			n[305]NRQVS[167]LK	Color2 [DarkGray]	1	4		2.21309e+06	-0.908898	0.83644	-0.18462	0.616609	-0.592245	1.56503
+	1.74402	1.56517	sp|Q9P270|SLAI2_HUMAN	SLAIN2	SLAIN motif-containing protein 2			n[305]GFPLGLS[167]AK	Color2 [DarkGray]	1	4		338269	-3.93166	-2.8929	-4.2722	-2.75758	-5.24129	-3.09918
+	2.79753	1.56413	sp|P29317|EPHA2_HUMAN	EPHA2	Ephrin type-A receptor 2			n[305]TLADFDPRVS[167]IRLPS[167]TSGSEGVPFR	Color2 [DarkGray]	1	4		55758808	1.13717	2.74454	1.51606	2.69559	1.33409	3.23957
+	2.45017	1.56262	sp|Q2KHR3|QSER1_HUMAN	QSER1	Glutamine and serine-rich protein 1			n[305]ALLRECS[167]VIK	Color2 [DarkGray]	1	4		6.00123e+06	-0.366466	1.22362	0.0337663	1.03653	-0.324982	1.77003
+	1.23415	1.56068	sp|Q96HC4|PDLI5_HUMAN	PDLIM5	PDZ and LIM domain protein 5			n[305]TGTTQSRS[167]FR	Color2 [DarkGray]	1	4		8897894	-0.946383	0.356764	-0.28329	0.247277	-0.883905	1.96441
+	2.36532	1.55819	sp|Q05D32|CTSL2_HUMAN	CTDSPL2	CTD small phosphatase-like protein 2			n[305]T[181]TLLGTIFSPVFNFFSPANK	Color2 [DarkGray]	1	4		1.12558e+06	-4.54886	-2.26535	-3.94073	-2.62891	-3.94995	-2.8707
+	2.6473	1.5568	sp|Q7Z6E9|RBBP6_HUMAN	RBBP6	E3 ubiquitin-protein ligase RBBP6			n[305]TANLAEANAS[167]EEDK	Color2 [DarkGray]	1	4		12976340	0.389795	2.32033	0.667965	2.41125	1.08014	2.07672
+	2.5564	1.55633	sp|Q9UII2|ATIF1_HUMAN	ATP5IF1	ATPase inhibitor, mitochondrial			n[305]GAGS[167]IREAGGAFGK	Color2 [DarkGray]	1	4		30433272	-0.311829	1.54253	0.265096	1.36596	0.178011	1.89179
+	1.59412	1.5555	sp|O00571|DDX3X_HUMAN	DDX3X	ATP-dependent RNA helicase DDX3X			n[305]QSS[167]GASSSSFSSSR	Color2 [DarkGray]	1	4		486640	-3.17046	-1.819	-4.16435	-2.44379	-3.07709	-1.4826
+	1.94401	1.55479	sp|P55210|CASP7_HUMAN	CASP7	Caspase-7			n[305]NVTMRS[167]IK	Color2 [DarkGray]	1	4		64024324	2.6685	4.19676	3.22014	3.98005	2.5326	4.9088
+	2.37079	1.55466	sp|Q09666|AHNK_HUMAN	AHNAK	Neuroblast differentiation-associated protein AHNAK			n[305]IHMS[167]GPK	Color2 [DarkGray]	1	4		258923360	1.62386	3.29074	2.11228	2.97306	1.41951	3.55583
+	3.89989	1.5542	sp|P48730|KC1D_HUMAN	CSNK1D	Casein kinase I isoform delta			n[305]GLPSTAS[167]GR	Color2 [DarkGray]	1	4		60803032	-0.76395	0.924929	-0.72144	0.600923	-0.743368	0.908001
+	4.747	1.55275	sp|Q9NQW6|ANLN_HUMAN	ANLN	Anillin			n[305]INSSS[167]VK	Color2 [DarkGray]	1	4		33466006	1.28664	2.89818	1.41311	2.87705	1.217	2.79976
+	2.497	1.55185	sp|O00571|DDX3X_HUMAN	DDX3X	ATP-dependent RNA helicase DDX3X			n[305]SSFFSDRGS[167]GSR	Color2 [DarkGray]	1	4		603387264	0.915879	2.87665	1.55132	2.48555	1.26944	3.02999
+	2.24839	1.55133	sp|P55081|MFAP1_HUMAN	MFAP1	Microfibrillar-associated protein 1			n[305]NFGRS[167]GR	Color2 [DarkGray]	1	4		5190536	-0.50104	1.38825	0.126906	0.904662	-0.348397	1.63854
+	2.70908	1.54806	sp|O14950|ML12B_HUMAN	MYL12B	Myosin regulatory light chain 12B	MYL12A, MYL9	sp|P19105|ML12A_HUMAN, sp|P24844|MYL9_HUMAN	n[305]AT[181]SNVFAM[147]FDQSQIQEFK	Color2 [DarkGray]	1	4		259308576	4.14297	6.12691	4.59625	5.69009	4.59714	6.16352
+	2.73763	1.54652	sp|O14974|MYPT1_HUMAN	PPP1R12A	Protein phosphatase 1 regulatory subunit 12A			n[305]RLAS[167]TSDIEEK	Color2 [DarkGray]	1	4		18418928	-0.245969	1.63083	0.239501	1.42666	0.283198	1.85881
+	1.19219	1.54586	sp|P09651|ROA1_HUMAN	HNRNPA1	Heterogeneous nuclear ribonucleoprotein A1			n[305]NQGGY[243]GGSSSSSSYGS[167]GR	Color2 [DarkGray]	1	4		0	-3.19462	-0.277719	-2.05252	-1.45704	-1.55868	-0.433496
+	1.99252	1.54456	sp|P20290|BTF3_HUMAN	BTF3	Transcription factor BTF3	BTF3L4	sp|Q96K17|BT3L4_HUMAN	n[305]IGGKGT[181]AR	Color2 [DarkGray]	1	4		27502310	0.805189	2.39363	1.36406	2.08793	0.64312	2.96448
+	1.51605	1.54251	sp|Q14247|SRC8_HUMAN	CTTN	Src substrate cortactin			n[305]AELS[167]YRGPVSGTEPEPVYSMEAADYR	Color2 [DarkGray]	1	4		12497911	-0.668221	1.03848	-0.205204	0.416925	-1.673	0.625686
+	2.51219	1.53996	sp|Q96RL1|UIMC1_HUMAN	UIMC1	BRCA1-A complex subunit RAP80			n[305]KDVETTSSVS[167]VK	Color2 [DarkGray]	1	4		9978217	0.943542	2.78327	1.06682	2.12274	1.13673	2.86095
+	2.11627	1.53803	sp|Q96Q45|TM237_HUMAN	TMEM237	Transmembrane protein 237			n[305]FQAADRS[167]ELIK	Color2 [DarkGray]	1	4		16250168	-0.00412846	1.91148	0.682394	1.64842	0.648278	2.38072
+	2.3448	1.5378	sp|Q9Y4B5|MTCL1_HUMAN	MTCL1	Microtubule cross-linking factor 1			n[305]AALGS[167]RR	Color2 [DarkGray]	1	4		1.90275e+06	-1.7276	0.0428181	-1.32628	-0.274451	-1.28447	0.50668
+	2.06267	1.53763	sp|Q96FK6|WDR89_HUMAN	WDR89	WD repeat-containing protein 89			n[305]VRVHS[167]NDS[167]YK	Color2 [DarkGray]	1	4		5219696	-2.29793	-0.463841	-1.64724	-0.971435	-2.23278	-0.129788
+	2.34159	1.53499	sp|Q15788|NCOA1_HUMAN	NCOA1	Nuclear receptor coactivator 1			n[305]QMS[167]SQNSPSR	Color2 [DarkGray]	1	4		2.98616e+06	-1.35697	0.839782	-0.954226	0.0365582	-0.963114	0.454318
+	1.56174	1.53414	sp|Q13546|RIPK1_HUMAN	RIPK1	Receptor-interacting serine/threonine-protein kinase 1			n[305]RMQS[167]LQLDCVAVPSSR	Color2 [DarkGray]	1	4		36926376	0.292603	2.88413	1.70322	2.20564	0.999108	2.50759
+	2.25958	1.53358	sp|P26358|DNMT1_HUMAN	DNMT1	DNA (cytosine-5)-methyltransferase 1			n[305]QT[181]TITSHFAK	Color2 [DarkGray]	1	4		54119376	1.90817	3.88393	2.64348	3.61699	2.5321	4.18355
+	2.68151	1.53321	sp|Q9BXP5|SRRT_HUMAN	SRRT	Serrate RNA effector molecule homolog			n[305]ERS[167]DYDR	Color2 [DarkGray]	1	4		65545528	-0.80555	1.00514	-0.74805	0.368037	-0.667966	1.0049
+	2.30681	1.53294	sp|Q09666|AHNK_HUMAN	AHNAK	Neuroblast differentiation-associated protein AHNAK			n[305]GS[167]EVGFHGAAPDIS[167]VK	Color2 [DarkGray]	1	4		2.18763e+06	-2.29761	-0.337326	-1.56016	-0.537924	-1.65661	-0.0403032
+	2.19258	1.53282	sp|O14950|ML12B_HUMAN	MYL12B	Myosin regulatory light chain 12B	MYL12A, MYL9	sp|P19105|ML12A_HUMAN, sp|P24844|MYL9_HUMAN	n[305]AT[181]SNVFAMFDQSQIQEFK	Color2 [DarkGray]	1	4		142070384	2.36155	4.47538	3.1947	4.01723	2.87937	4.54149
+	2.00809	1.53235	sp|Q14126|DSG2_HUMAN	DSG2	Desmoglein-2			n[305]GFT[181]PIPGTIEMLHPWNNEGAPPEDK	Color2 [DarkGray]	1	4		20950068	0.80098	1.93036	0.0994945	1.94128	0.931124	2.55701
+	1.18949	1.53169	sp|Q9P227|RHG23_HUMAN	ARHGAP23	Rho GTPase-activating protein 23			n[305]TGLLHALS[167]FR	Color2 [DarkGray]	1	4		4.40326e+06	-4.79527	-2.89982	-5.03081	-2.77946	-3.11945	-2.67118
+	2.87735	1.53153	sp|Q5RL73|RBM48_HUMAN	RBM48	RNA-binding protein 48			n[305]TMGHYNHNDS[167]LRK	Color2 [DarkGray]	1	4		4.47407e+06	-0.648135	0.869944	-0.654837	0.470786	-1.04597	0.904933
+	3.09416	1.53088	sp|O75122|CLAP2_HUMAN	CLASP2	CLIP-associating protein 2			n[305]AHHAAGQS[167]VR	Color2 [DarkGray]	1	4		19034970	0.190152	1.69515	0.233665	1.41747	0.0707216	1.97455
+	2.63546	1.5307	sp|Q9UK76|JUPI1_HUMAN	JPT1	Jupiter microtubule associated homolog 1			n[305]GVDPNSRNS[167]SR	Color2 [DarkGray]	1	4		156999200	0.9973	2.73918	1.22953	2.49906	1.49816	3.07886
+	2.41316	1.53068	sp|P51858|HDGF_HUMAN	HDGF	Hepatoma-derived growth factor			n[305]ASGYQSS[167]QKK	Color2 [DarkGray]	1	4		32127342	-0.29154	1.4653	0.248767	1.18431	-0.0217495	1.8779
+	3.13668	1.52961	sp|O00571|DDX3X_HUMAN	DDX3X	ATP-dependent RNA helicase DDX3X			n[305]QS[167]SGASSSSFSSSR	Color2 [DarkGray]	1	4		2.524e+06	-1.62602	0.108592	-1.47049	-0.322598	-1.83634	-0.130031
+	2.58419	1.52891	sp|Q6XZF7|DNMBP_HUMAN	DNMBP	Dynamin-binding protein			n[305]LNIHS[167]IIK	Color2 [DarkGray]	1	4		7561948	0.00723934	1.60478	0.372613	1.31715	-0.127978	1.91666
+	2.19746	1.52789	sp|P11171|EPB41_HUMAN	EPB41	Protein 4.1	INTS1	sp|Q8N201|INT1_HUMAN	n[305]FLALGS[167]K	Color2 [DarkGray]	1	4		3.43449e+06	-0.90293	0.787781	-0.453722	0.426875	-0.686341	1.32602
+	2.29217	1.52677	sp|Q16543|CDC37_HUMAN	CDC37	Hsp90 co-chaperone Cdc37			n[305]S[167]MVNTKPEK	Color2 [DarkGray]	1	4		17592562	0.865738	2.54775	1.49202	2.40942	1.09964	3.08054
+	2.04327	1.52528	sp|P42684|ABL2_HUMAN	ABL2	Tyrosine-protein kinase ABL2			n[305]GSSAARPS[167]GR	Color2 [DarkGray]	1	4		6.46958e+06	-1.13974	0.758097	-0.458253	0.169794	-1.10534	0.944629
+	2.86008	1.5241	sp|Q8WX93|PALLD_HUMAN	PALLD	Palladin			n[305]S[167]APAM[147]QSSGSFNYARPK	Color2 [DarkGray]	1	4		13477604	0.627437	2.58063	1.13574	2.27582	1.09998	2.57899
+	2.57725	1.52281	sp|Q6IQ23|PKHA7_HUMAN	PLEKHA7	Pleckstrin homology domain-containing family A member 7			n[305]DRS[167]LKPVK	Color2 [DarkGray]	1	4		1.72981e+06	-1.18359	0.273863	-0.960949	0.15856	-1.12632	0.865135
+	2.30551	1.51688	sp|Q5SW96|ARH_HUMAN	LDLRAP1	Low density lipoprotein receptor adapter protein 1			n[305]ALIRS[167]PS[167]LAK	Color2 [DarkGray]	1	4		7.06121e+06	-1.48511	0.280358	-0.866389	0.0586185	-1.11652	0.743658
+	2.56196	1.5162	sp|O43719|HTSF1_HUMAN	HTATSF1	HIV Tat-specific factor 1			n[305]RSDS[167]VSAS[167]ER	Color2 [DarkGray]	1	4		8.02886e+06	-2.15906	-0.570846	-2.23373	-1.05215	-2.7254	-0.946573
+	2.47803	1.51472	sp|Q8IVF2|AHNK2_HUMAN	AHNAK2	Protein AHNAK2			n[305]IKLPS[167]FRWS[167]PK	Color2 [DarkGray]	1	4		3430679	-0.739785	0.819599	-0.47548	0.447742	-1.14972	0.911824
+	1.9235	1.51403	sp|P60468|SC61B_HUMAN	SEC61B	Protein transport protein Sec61 subunit beta			n[305]AAGS[167]T[181]VRQR	Color2 [DarkGray]	1	4		19842882	0.812819	2.71708	1.46621	2.04154	0.924671	2.98715
+	1.32422	1.51366	sp|Q9UHD8|SEPT9_HUMAN	SEPTIN9	Septin-9			n[305]AS[167]LRRVELSGPK	Color2 [DarkGray]	1	4		3.48178e+06	-0.078578	0.630107	0.247682	1.20037	-0.662426	2.21719
+	2.4163	1.51334	sp|Q75N03|HAKAI_HUMAN	CBLL1	E3 ubiquitin-protein ligase Hakai			n[305]SVSQETFRIS[167]TRK	Color2 [DarkGray]	1	4		4599678	-1.58462	0.348578	-1.1729	-0.0251064	-0.929685	0.529339
+	2.06741	1.50679	sp|P29084|T2EB_HUMAN	GTF2E2	Transcription initiation factor IIE subunit beta			n[305]RSASSESSSSSS[167]K	Color2 [DarkGray]	1	4		4865429	-0.781336	0.741825	-0.83164	0.195557	-0.698515	1.27149
+	2.14061	1.50286	sp|Q92997|DVL3_HUMAN	DVL3	Segment polarity protein dishevelled homolog DVL-3			n[305]S[167]SLRGPR	Color2 [DarkGray]	1	4		4625931	-1.32084	0.885729	-0.646255	0.343122	-0.529073	0.783565
+	1.92528	1.50002	sp|Q09666|AHNK_HUMAN	AHNAK	Neuroblast differentiation-associated protein AHNAK			n[305]FSM[147]PS[167]LKGEGPEFDVNLSK	Color2 [DarkGray]	1	4		8683242	-0.264247	1.22261	-0.00243521	0.730135	-0.457188	1.82343
+	2.91185	1.4993	sp|Q9NR12|PDLI7_HUMAN	PDLIM7	PDZ and LIM domain protein 7			n[305]YTFAPSVS[167]LNK	Color2 [DarkGray]	1	4		59771648	-1.71993	-0.0582447	-1.37347	-0.332657	-1.59799	0.197419
+	3.18	1.49905	sp|Q8NDT2|RB15B_HUMAN	RBM15B	Putative RNA-binding protein 15B			n[305]RFGEIS[167]LR	Color2 [DarkGray]	1	4		4.10025e+06	-0.42119	1.21908	-0.219136	0.873411	-0.417912	1.34643
+	1.93742	1.4985	sp|Q13177|PAK2_HUMAN	PAK2	Serine/threonine-protein kinase PAK 2			n[305]IISIFSGTEKGS[167]K	Color2 [DarkGray]	1	4		4.62168e+06	-2.24538	-0.976826	-2.05567	-1.13696	-2.40241	-0.0941744
+	2.67795	1.49636	sp|Q09666|AHNK_HUMAN	AHNAK	Neuroblast differentiation-associated protein AHNAK			n[305]VDINT[181]PDVDVHGPDWHLK	Color2 [DarkGray]	1	4		175795552	-0.583049	1.42599	-0.109145	0.870435	-0.318119	1.18234
+	1.99569	1.49629	sp|P23588|IF4B_HUMAN	EIF4B	Eukaryotic translation initiation factor 4B			n[305]AFGS[167]GYRRDDDYR	Color2 [DarkGray]	1	4		51838552	0.349137	1.86571	0.576616	1.35436	0.232937	2.4275
+	2.41132	1.49588	sp|Q15386|UBE3C_HUMAN	UBE3C	Ubiquitin-protein ligase E3C			n[305]VSLGGAS[167]RK	Color2 [DarkGray]	1	4		19922480	1.04496	2.72593	1.19956	2.25773	1.32329	3.07179
+	2.30294	1.49474	sp|P05556|ITB1_HUMAN	ITGB1	Integrin beta-1			n[305]SAVT[181]TVVNPK	Color2 [DarkGray]	1	4		32021724	-1.03917	0.452578	-1.11562	-0.110355	-1.19646	0.79077
+	2.26763	1.49356	sp|Q09666|AHNK_HUMAN	AHNAK	Neuroblast differentiation-associated protein AHNAK			n[305]VSVGAPDLSLEASEGS[167]IKLPK	Color2 [DarkGray]	1	4		23601014	0.858214	2.24985	1.21195	2.28749	1.01226	3.02576
+	4.15971	1.49292	sp|O76039|CDKL5_HUMAN	CDKL5	Cyclin-dependent kinase-like 5			n[305]SQQNRHS[167]FM[147]ESSQSK	Color2 [DarkGray]	1	4		421371	-3.90753	-2.61459	-4.02346	-2.53663	-4.06303	-2.36403
+	2.44655	1.49279	sp|Q15170|TCAL1_HUMAN	TCEAL1	Transcription elongation factor A protein-like 1			n[305]HKLEEGS[167]FK	Color2 [DarkGray]	1	4		14202318	1.1717	2.59051	1.24499	2.26674	1.04031	3.07813
+	2.17122	1.49277	sp|Q09666|AHNK_HUMAN	AHNAK	Neuroblast differentiation-associated protein AHNAK			n[305]GGVTGSPEAS[167]ISGSK	Color2 [DarkGray]	1	4		33294118	1.4739	3.15061	2.08541	2.98799	1.84242	3.74144
+	3.62645	1.49248	sp|Q8IVF2|AHNK2_HUMAN	AHNAK2	Protein AHNAK2			n[305]VEM[147]PS[167]FK	Color2 [DarkGray]	1	4		6375242	-0.805108	0.776781	-0.649201	0.522187	-0.87563	0.848524
+	3.7969	1.49124	sp|Q70E73|RAPH1_HUMAN	RAPH1	Ras-associated and pleckstrin homology domains-containing protein 1			n[305]GLSS[167]SSNR	Color2 [DarkGray]	1	4		20773970	-1.0818	0.543344	-0.854494	0.363844	-0.971448	0.658792
+	2.64177	1.49059	sp|Q13243|SRSF5_HUMAN	SRSF5	Serine/arginine-rich splicing factor 5			n[305]YS[167]DRFSSR	Color2 [DarkGray]	1	4		37572304	1.87059	3.67517	2.41418	3.51263	2.37412	3.94285
+	3.54564	1.48979	sp|P39748|FEN1_HUMAN	FEN1	Flap endonuclease 1			n[305]EPEPKGS[167]TK	Color2 [DarkGray]	1	4		7133081	-0.158333	1.54844	0.205384	1.3654	-0.0281887	1.5744
+	1.42377	1.48828	sp|Q9UH99|SUN2_HUMAN	SUN2	SUN domain-containing protein 2			n[305]DSPLRT[181]LK	Color2 [DarkGray]	1	4		25524888	0.338176	2.03547	1.42109	1.68917	0.193423	2.69289
+	3.05014	1.48774	sp|Q9NYV4|CDK12_HUMAN	CDK12	Cyclin-dependent kinase 12			n[305]T[181]QVSVTAAIPHLK	Color2 [DarkGray]	1	4		4.78985e+06	-2.29547	-0.444297	-2.08269	-0.903908	-2.31742	-0.884169
+	4.61319	1.4876	sp|Q5TKA1|LIN9_HUMAN	LIN9	Protein lin-9 homolog			n[305]LFS[167]DEDDRQINTR	Color2 [DarkGray]	1	4		29201218	0.899353	2.55771	1.02297	2.48148	1.03575	2.38166
+	2.49012	1.48647	sp|Q7Z6J6|FRMD5_HUMAN	FRMD5	FERM domain-containing protein 5			n[305]EVMES[167]SAK	Color2 [DarkGray]	1	4		2240403	-0.879086	0.672551	-0.644916	0.378259	-0.732082	1.15252
+	2.75782	1.48429	sp|Q09666|AHNK_HUMAN	AHNAK	Neuroblast differentiation-associated protein AHNAK			n[305]GSEVGFHGAAPDIS[167]VK	Color2 [DarkGray]	1	4		2.47005e+06	-1.7743	-0.388355	-1.77677	-0.572561	-1.76606	0.0966492
+	2.14227	1.48427	sp|Q8N0T1|RBIS_HUMAN	RBIS	Ribosomal biogenesis factor			n[305]S[167]RNVFHIASQK	Color2 [DarkGray]	1	4		1617881	-2.17714	-0.204535	-1.40972	-0.667294	-1.75841	-0.0206327
+	3.45852	1.48306	sp|Q14011|CIRBP_HUMAN	CIRBP	Cold-inducible RNA-binding protein			n[305]S[167]QSGGYSDR	Color2 [DarkGray]	1	4		28780544	1.80335	3.46821	1.94006	3.17937	2.01726	3.56229
+	2.67604	1.48269	sp|Q9P031|TAP26_HUMAN	CCDC59	Thyroid transcription factor 1-associated protein 26			n[305]IQQS[167]YKK	Color2 [DarkGray]	1	4		22883220	1.39491	3.25991	1.85225	2.77726	1.371	3.02905
+	1.43287	1.48261	sp|P41162|ETV3_HUMAN	ETV3	ETS translocation variant 3			n[305]HYLHSQACSVFNYHLS[167]PR	Color2 [DarkGray]	1	4		2.46467e+06	-4.20822	-2.26412	-4.08219	-2.33556	-2.7418	-1.9847
+	2.36875	1.48228	sp|Q9BV36|MELPH_HUMAN	MLPH	Melanophilin			n[305]VIRS[167]LHGR	Color2 [DarkGray]	1	4		2.70853e+06	-0.765361	0.568215	-0.748681	0.285413	-0.961559	1.1176
+	2.34643	1.4815	sp|Q92544|TM9S4_HUMAN	TM9SF4	Transmembrane 9 superfamily member 4			n[305]KDIANY[243]NK	Color2 [DarkGray]	1	4		5904768	0.376202	1.70734	0.161237	1.27934	0.134576	2.12983
+	2.43207	1.48079	sp|P49006|MRP_HUMAN	MARCKSL1	MARCKS-related protein			n[305]KPFKLS[167]GLS[167]FK	Color2 [DarkGray]	1	4		4125799	-0.83372	0.740314	-0.234709	0.701946	-0.740335	1.19135
+	4.37543	1.48013	sp|Q8TF76|HASP_HUMAN	HASPIN	Serine/threonine-protein kinase haspin			n[305]AS[167]FSFHK	Color2 [DarkGray]	1	4		6087662	-1.00543	0.65992	-0.93519	0.488317	-0.809364	0.542161
+	2.31014	1.47975	sp|Q15788|NCOA1_HUMAN	NCOA1	Nuclear receptor coactivator 1			n[305]QM[147]S[167]SQNSPSR	Color2 [DarkGray]	1	4		940747	-2.871	-1.01927	-3.06614	-1.71678	-2.50224	-1.26408
+	3.27579	1.4753	sp|Q8NFZ5|TNIP2_HUMAN	TNIP2	TNFAIP3-interacting protein 2			n[305]QDS[167]REPDAGR	Color2 [DarkGray]	1	4		849658	-3.9154	-2.25345	-3.8417	-2.58239	-4.12841	-2.62377
+	2.04522	1.47446	sp|Q96AP7|ESAM_HUMAN	ESAM	Endothelial cell-selective adhesion molecule			n[305]NGTLSSVTS[167]AR	Color2 [DarkGray]	1	4		36823380	1.5634	3.20734	1.94806	2.65697	1.56515	3.63568
+	3.1602	1.47236	sp|Q9UHD8|SEPT9_HUMAN	SEPTIN9	Septin-9			n[305]RTEITIVKPQES[167]AHRR	Color2 [DarkGray]	1	4		5281956	-1.09286	0.56989	-0.936757	0.192496	-0.947864	0.677216
+	2.69021	1.4716	sp|P16989|YBOX3_HUMAN	YBX3	Y-box-binding protein 3			n[305]ENQQATSGPNQPS[167]VRR	Color2 [DarkGray]	1	4		34668868	0.336828	2.08759	0.625998	1.64917	0.622581	2.26344
+	2.45217	1.46916	sp|Q09666|AHNK_HUMAN	AHNAK	Neuroblast differentiation-associated protein AHNAK			n[305]MPS[167]M[147]NIQTHK	Color2 [DarkGray]	1	4		3220744	-1.94668	-0.410772	-1.9395	-0.736257	-1.65186	0.0164623
+	2.24908	1.46869	sp|Q96RL1|UIMC1_HUMAN	UIMC1	BRCA1-A complex subunit RAP80			n[305]KDVETTS[167]SVSVK	Color2 [DarkGray]	1	4		9348170	0.909618	2.79484	1.19481	2.05335	1.17766	2.83997
+	2.48704	1.46594	sp|Q15170|TCAL1_HUMAN	TCEAL1	Transcription elongation factor A protein-like 1		rev_sp|P30533|AMRP_HUMAN	n[305]LEEGS[167]FK	Color2 [DarkGray]	1	4		22411474	2.15586	4.01282	2.62018	3.54548	2.53821	4.15376
+	2.86493	1.4647	sp|Q9UHB6|LIMA1_HUMAN	LIMA1	LIM domain and actin-binding protein 1			n[305]SRPFTVAASFQSTS[167]VK	Color2 [DarkGray]	1	4		72923008	0.302089	1.92674	0.572381	1.61555	0.467046	2.19333
+	2.16528	1.46456	sp|Q96C24|SYTL4_HUMAN	SYTL4	Synaptotagmin-like protein 4			n[305]ILRPS[167]EYTK	Color2 [DarkGray]	1	4		4.11734e+06	-1.66324	-0.0159054	-1.13665	-0.114387	-1.12434	0.599762
+	2.84022	1.46197	sp|Q9UKT4|FBX5_HUMAN	FBXO5	F-box only protein 5			n[305]SAAQTS[167]LKK	Color2 [DarkGray]	1	4		1.93164e+06	-1.86465	-0.181149	-1.5126	-0.415115	-1.51503	0.0898829
+	1.88347	1.45991	sp|Q09666|AHNK_HUMAN	AHNAK	Neuroblast differentiation-associated protein AHNAK			n[305]FS[167]M[147]PSLKGEGPEFDVNLSK	Color2 [DarkGray]	1	4		9444170	-0.665253	1.00428	-0.129333	0.569296	-0.387676	1.6239
+	1.73243	1.45985	sp|O94804|STK10_HUMAN	STK10	Serine/threonine-protein kinase 10			n[305]ILRLS[167]T[181]FEK	Color2 [DarkGray]	1	4		1.28437e+06	-3.07896	-1.0493	-2.17946	-1.13958	-1.94019	-0.630169
+	1.58429	1.45865	sp|Q9BSJ6|PIMRE_HUMAN	PIMREG	Protein PIMREG			n[305]GS[167]GSPTHSLS[167]QK	Color2 [DarkGray]	1	4		12817070	-0.583295	1.64317	0.588634	1.03002	0.152027	1.86012
+	4.68836	1.45855	sp|Q8N999|CL029_HUMAN	C12orf29	Uncharacterized protein C12orf29			n[305]RLGS[167]VQR	Color2 [DarkGray]	1	4		83850768	1.94558	3.54977	2.03508	3.35395	1.9748	3.4274
+	2.10206	1.45817	sp|P39880|CUX1_HUMAN	CUX1	Homeobox protein cut-like 1			n[305]AANLNS[167]IIHRLEK	Color2 [DarkGray]	1	4		1.13579e+06	-2.50554	-0.858085	-2.24111	-1.51099	-2.56466	-0.567737
+	2.25182	1.45462	sp|Q14699|RFTN1_HUMAN	RFTN1	Raftlin			n[305]FQWRFS[167]REEM[147]HNR	Color2 [DarkGray]	1	4		17751186	0.462052	2.0743	0.819004	1.68492	0.655475	2.54116
+	1.32276	1.45028	sp|Q8N2W9|PIAS4_HUMAN	PIAS4	E3 SUMO-protein ligase PIAS4			n[305]AGAVPRT[181]PLAGPNIDYPVLYGK	Color2 [DarkGray]	1	4		525301	-4.36474	-1.81432	-3.11447	-2.17611	-2.70211	-1.84006
+	2.26468	1.44715	sp|Q9NQW6|ANLN_HUMAN	ANLN	Anillin			n[305]ET[181]ERPSIK	Color2 [DarkGray]	1	4		133539536	0.965995	2.32234	1.30491	2.44603	1.25931	3.10329
+	3.99851	1.44681	sp|Q14692|BMS1_HUMAN	BMS1	Ribosome biogenesis protein BMS1 homolog			n[305]HFNS[167]LHIPK	Color2 [DarkGray]	1	4		2112912	-0.931811	0.408531	-0.909514	0.41866	-1.19111	0.480788
+	3.83719	1.44641	sp|P48634|PRC2A_HUMAN	PRRC2A	Protein PRRC2A		rev_sp|P07451|CAH3_HUMAN	n[305]AS[167]SLLSR	Color2 [DarkGray]	1	4		53760908	0.931347	2.29797	0.7993	2.10843	0.727277	2.39077
+	2.41986	1.44427	sp|Q7Z6I8|CE024_HUMAN	C5orf24	UPF0461 protein C5orf24			n[305]VSPGRPPGS[167]IK	Color2 [DarkGray]	1	4		25848166	0.832858	2.55904	1.1583	2.13883	1.22428	2.8504
+	2.98381	1.44399	sp|Q70E73|RAPH1_HUMAN	RAPH1	Ras-associated and pleckstrin homology domains-containing protein 1			n[305]GLSSSS[167]NR	Color2 [DarkGray]	1	4		21460248	-0.969001	0.452482	-0.83532	0.210149	-1.19313	0.671899
+	4.19048	1.43783	sp|P27361|MK03_HUMAN	MAPK3	Mitogen-activated protein kinase 3			n[305]IADPEHDHT[181]GFLTEY[243]VATR	Color2 [DarkGray]	1	4		37103120	1.87128	3.35045	1.77573	3.15552	1.69692	3.15145
+	2.79047	1.43769	sp|P35367|HRH1_HUMAN	HRH1	Histamine H1 receptor			n[305]DAGGGS[167]VLKS[167]PSQTPK	Color2 [DarkGray]	1	4		10179427	-0.68088	0.706903	-0.590645	0.45208	-0.818005	1.06456
+	2.49513	1.43727	sp|Q6IQ49|SDE2_HUMAN	SDE2	Replication stress response regulator SDE2			n[305]FPSGS[167]QR	Color2 [DarkGray]	1	4		20386250	-1.30261	0.522382	-0.813001	0.107534	-0.892666	0.673618
+	2.43192	1.43667	sp|Q9Y546|LRC42_HUMAN	LRRC42	Leucine-rich repeat-containing protein 42			n[305]HEAISSQES[167]K	Color2 [DarkGray]	1	4		10481849	-2.29425	-0.553833	-1.68981	-0.839196	-2.00652	-0.28753
+	2.09398	1.43582	sp|Q07157|ZO1_HUMAN	TJP1	Tight junction protein ZO-1			n[305]S[167]GVVNRRSEK	Color2 [DarkGray]	1	4		2407644	-0.916752	0.761656	-0.211576	0.494796	-0.728936	1.19374
+	2.73946	1.43509	sp|Q96JP5|ZFP91_HUMAN	ZFP91	E3 ubiquitin-protein ligase ZFP91			n[305]KHDADS[167]FYQFSCNICGK	Color2 [DarkGray]	1	4		2.24276e+06	-0.333422	1.02541	-0.399515	0.659717	-0.637398	1.24979
+	3.57546	1.4309	sp|Q9UKD1|GMEB2_HUMAN	GMEB2	Glucocorticoid modulatory element-binding protein 2			n[305]ATSGPAAM[147]ASQVLT[181]QSAQLALGPGVPVPQLTSVPLGK	Color2 [DarkGray]	1	4		6.69372e+06	-2.0469	-0.874734	-2.24767	-0.562584	-2.04559	-0.610143
+	3.12588	1.43076	sp|Q14152|EIF3A_HUMAN	EIF3A	Eukaryotic translation initiation factor 3 subunit A			n[305]RLGDS[167]SLSRK	Color2 [DarkGray]	1	4		7.15347e+06	1.12004	2.74071	1.60216	2.66614	1.22879	2.83641
+	1.24079	1.42988	sp|P48681|NEST_HUMAN	NES	Nestin			n[305]LGS[167]LLPVLSPTSLPS[167]PLPATLETPVPAFLK	Color2 [DarkGray]	1	4		542541	-3.24273	-3.13027	-4.47912	-2.81101	-4.89646	-2.38737
+	1.42345	1.42958	sp|Q92686|NEUG_HUMAN	NRGN	Neurogranin			n[305]IQAS[167]FRGHM[147]AR	Color2 [DarkGray]	1	4		5.23456e+06	-0.859146	0.514779	-0.338017	0.356515	-0.470292	1.74999
+	1.1627	1.42867	sp|Q9BXB4|OSB11_HUMAN	OSBPL11	Oxysterol-binding protein-related protein 11			n[305]S[167]FSLASSSNS[167]PISQR	Color2 [DarkGray]	1	4		11015974	-2.00507	-0.512864	-2.9018	-0.617512	-0.914683	-0.405168
+	1.67547	1.42758	sp|Q6PJF5|RHDF2_HUMAN	RHBDF2	Inactive rhomboid protein 2			n[305]LKAS[167]CQR	Color2 [DarkGray]	1	4		2.70952e+06	-1.09928	0.276839	-0.72221	-0.189993	-1.43095	0.943464
+	1.9664	1.42733	sp|P27816|MAP4_HUMAN	MAP4	Microtubule-associated protein 4			n[305]STSTSS[167]M[147]KK	Color2 [DarkGray]	1	4		1.67365e+06	-1.70972	-0.169456	-1.21473	-0.391215	-1.37605	0.542163
+	1.29462	1.4256	sp|Q9H223|EHD4_HUMAN	EHD4	EH domain-containing protein 4			n[305]IS[167]PLMNLISQEETSTPTQLVQGGAFDGTTEGPFNQGYGEGAK	Color2 [DarkGray]	1	4		0	-2.05425	-1.32235	NaN	-0.136934	-2.12424	-0.531656
+	2.62509	1.42502	sp|O75044|SRGP2_HUMAN	SRGAP2	SLIT-ROBO Rho GTPase-activating protein 2			n[305]RPES[167]GSIRK	Color2 [DarkGray]	1	4		21666522	2.03881	3.58646	2.18465	3.24754	2.26551	3.93001
+	2.34528	1.42466	sp|O95810|CAVN2_HUMAN	CAVIN2	Caveolae-associated protein 2		rev_sp|Q9Y2I6|NINL_HUMAN	n[305]IVS[167]VERR	Color2 [DarkGray]	1	4		8547978	0.324669	1.92794	0.83241	1.61008	0.360022	2.25305
+	2.72975	1.42462	sp|Q15398|DLGP5_HUMAN	DLGAP5	Disks large-associated protein 5		rev_sp|Q8NEV8|EXPH5_HUMAN	n[305]AIPSS[167]VR	Color2 [DarkGray]	1	4		6.56365e+06	-0.813611	0.766284	-0.619483	0.377318	-0.679544	1.01763
+	2.69934	1.42315	sp|P50552|VASP_HUMAN	VASP	Vasodilator-stimulated phosphoprotein			n[305]VPAQSES[167]VRRPWEK	Color2 [DarkGray]	1	4		48008840	1.03138	2.68673	1.50924	2.40211	1.15193	2.87316
+	2.74885	1.42292	sp|O00571|DDX3X_HUMAN	DDX3X	ATP-dependent RNA helicase DDX3X			n[305]QSSGASSSSFS[167]SSR	Color2 [DarkGray]	1	4		3.86658e+06	-0.918865	0.511591	-0.94942	0.0653048	-1.19915	0.624417
+	2.84193	1.42286	sp|Q9NZW5|MPP6_HUMAN	MPP6	MAGUK p55 subfamily member 6			n[305]DWDNSGPFCGTIS[167]SKK	Color2 [DarkGray]	1	4		1.29718e+06	-2.59029	-1.11101	-2.25568	-1.18254	-2.40537	-0.689228
+	2.88375	1.4227	sp|Q8TEQ0|SNX29_HUMAN	SNX29	Sorting nexin-29	SNX29P2	sp|Q8IUI4|S29P2_HUMAN	n[305]HRGHS[167]ESPEK	Color2 [DarkGray]	1	4		4.49269e+06	-1.95685	-0.387492	-1.53519	-0.570068	-1.89088	-0.157253
+	2.43881	1.42141	sp|P27816|MAP4_HUMAN	MAP4	Microtubule-associated protein 4			n[305]STSTSS[167]MKK	Color2 [DarkGray]	1	4		130034304	1.30183	2.62946	1.43751	2.43815	1.25632	3.19229
+	1.87514	1.42078	sp|Q96AT1|K1143_HUMAN	KIAA1143	Uncharacterized protein KIAA1143			n[305]YSGLTAS[167]SKK	Color2 [DarkGray]	1	4		2.29137e+06	-1.65353	0.0934763	-0.841601	-0.304679	-1.50697	0.47145
+	3.39369	1.42048	sp|Q8IWC1|MA7D3_HUMAN	MAP7D3	MAP7 domain-containing protein 3			n[305]RLSS[167]YTECYK	Color2 [DarkGray]	1	4		20728176	1.67099	3.16875	1.77454	3.09977	1.975	3.41345
+	2.72922	1.42043	sp|O43719|HTSF1_HUMAN	HTATSF1	HIV Tat-specific factor 1			n[305]S[167]DSVSAS[167]ERAGPSR	Color2 [DarkGray]	1	4		4832786	-2.38195	-0.53317	-1.85206	-0.937398	-2.1652	-0.667338
+	1.96407	1.42026	sp|P09651|ROA1_HUMAN	HNRNPA1	Heterogeneous nuclear ribonucleoprotein A1	HNRNPA1L2	sp|Q32P51|RA1L2_HUMAN	n[305]QEM[147]ASAS[167]SSQRGR	Color2 [DarkGray]	1	4		3.27251e+06	-2.48165	-1.17725	-2.7017	-1.79468	-2.80763	-0.758265
+	1.67733	1.41958	sp|Q6NZI2|CAVN1_HUMAN	CAVIN1	Caveolae-associated protein 1			n[305]IKRS[167]GLR	Color2 [DarkGray]	1	4		8924320	-0.349648	1.15987	0.428063	0.901065	-0.566476	1.70975
+	2.02197	1.41797	sp|O95466|FMNL1_HUMAN	FMNL1	Formin-like protein 1			n[305]LTPAHS[167]RK	Color2 [DarkGray]	1	4		263375712	3.50712	4.92486	4.00633	4.7066	3.10279	5.23868
+	2.64617	1.41644	sp|Q9UGR2|Z3H7B_HUMAN	ZC3H7B	Zinc finger CCCH domain-containing protein 7B			n[305]GS[167]PALLPSTPTM[147]PLFPHVLDLLAPLDSSR	Color2 [DarkGray]	1	4		2.38107e+06	-3.53723	-1.71214	-3.35955	-1.81354	-2.95217	-2.07396
+	3.02676	1.41442	sp|Q92597|NDRG1_HUMAN	NDRG1	Protein NDRG1			n[305]SHTSEGTRS[167]R	Color2 [DarkGray]	1	4		16831582	-0.802986	0.742461	-0.542359	0.537741	-0.5946	1.02312
+	2.46032	1.41442	sp|P30291|WEE1_HUMAN	WEE1	Wee1-like protein kinase			n[305]GIDSSS[167]VK	Color2 [DarkGray]	1	4		15041053	1.19704	2.83781	1.29049	2.35894	1.52517	3.05921
+	2.15977	1.41436	sp|Q96PN7|TREF1_HUMAN	TRERF1	Transcriptional-regulating factor 1			n[305]VLGDHLLLDPTHELPPY[243]TPPPMLS[167]PVR	Color2 [DarkGray]	1	4		11876584	-0.59488	1.18252	0.29734	1.34594	-0.340175	1.0769
+	2.67898	1.41264	sp|Q9UM11|FZR1_HUMAN	FZR1	Fizzy-related protein homolog			n[305]GLFTYSLS[167]TK	Color2 [DarkGray]	1	4		4.1778e+06	-2.05075	-0.959621	-2.07863	-0.832527	-2.23447	-0.333772
+	2.58897	1.41225	sp|Q13428|TCOF_HUMAN	TCOF1	Treacle protein			n[305]AGAVAS[167]QTK	Color2 [DarkGray]	1	4		22709332	0.938209	2.76889	0.901614	2.30356	1.07007	2.0742
+	1.69562	1.41162	sp|P25054|APC_HUMAN	APC	Adenomatous polyposis coli protein			n[305]TSSPSTAS[167]TK	Color2 [DarkGray]	1	4		565366	-4.21536	-2.1532	-3.81133	-2.60374	-3.05216	-2.08707
+	2.71387	1.4109	sp|Q99959|PKP2_HUMAN	PKP2	Plakophilin-2			n[305]AY[243]HSLKD	Color2 [DarkGray]	1	4		40703860	1.60898	2.85397	1.67493	2.72913	1.15081	3.08432
+	1.77962	1.40853	sp|O43290|SNUT1_HUMAN	SART1	U4/U6.U5 tri-snRNP-associated protein 1			n[305]QLS[167]HRFHGK	Color2 [DarkGray]	1	4		4.38678e+06	-0.0553265	1.15815	0.134276	0.863249	-0.313891	1.96924
+	3.81855	1.40708	sp|O60285|NUAK1_HUMAN	NUAK1	NUAK family SNF1-like kinase 1			n[305]VTSHS[167]LSCR	Color2 [DarkGray]	1	4		10676228	-1.16644	0.333181	-1.16101	0.150449	-0.984242	0.425917
+	3.05165	1.40699	sp|Q8IVF2|AHNK2_HUMAN	AHNAK2	Protein AHNAK2			n[305]VDMPS[167]FK	Color2 [DarkGray]	1	4		3.87168e+06	-1.16578	0.177444	-1.12254	-0.05336	-1.40607	0.4025
+	3.46309	1.40681	sp|O43516|WIPF1_HUMAN	WIPF1	WAS/WASL-interacting protein family member 1			n[305]GT[181]ALGGGSIR	Color2 [DarkGray]	1	4		15008992	0.229522	1.55164	-0.04847	1.33465	0.135598	1.65077
+	2.57524	1.40672	sp|Q8WUF5|IASPP_HUMAN	PPP1R13L	RelA-associated inhibitor			n[305]S[167]DAGSYRR	Color2 [DarkGray]	1	4		10955105	0.334352	1.61081	0.1101	1.29739	0.237556	1.99396
+	2.92829	1.40654	sp|O60716|CTND1_HUMAN	CTNND1	Catenin delta-1			n[305]SDKKPDREEIQMS[167]NMGSNTK	Color2 [DarkGray]	1	4		15901449	1.3438	2.56947	1.44515	2.63827	1.29329	3.09412
+	2.1124	1.40628	sp|Q9UJM3|ERRFI_HUMAN	ERRFI1	ERBB receptor feedback inhibitor 1			n[305]LTVNGVCASTPPLT[181]PIK	Color2 [DarkGray]	1	4		4.96226e+06	-1.42089	0.55633	-0.59947	0.0927525	-0.98727	0.562144
+	2.69821	1.4057	sp|Q99959|PKP2_HUMAN	PKP2	Plakophilin-2			n[305]AYHS[167]LKD	Color2 [DarkGray]	1	4		42524640	0.719166	2.25059	1.08272	1.95938	0.587706	2.3967
+	2.76388	1.40556	sp|Q5EBL4|RIPL1_HUMAN	RILPL1	RILP-like protein 1			n[305]RLFS[167]FFSR	Color2 [DarkGray]	1	4		0	0.0046196	1.345	-0.0438323	1.08198	-0.0216732	1.7288
+	2.19125	1.40444	sp|Q15464|SHB_HUMAN	SHB	SH2 domain-containing adapter protein B			n[305]QES[167]VRS[167]QHK	Color2 [DarkGray]	1	4		31225482	-0.929917	0.991176	-0.389977	0.380348	-0.485291	1.03662
+	2.76168	1.4023	sp|Q15056|IF4H_HUMAN	EIF4H	Eukaryotic translation initiation factor 4H			n[305]TGPPM[147]GS[167]R	Color2 [DarkGray]	1	4		5248248	-1.18446	0.258194	-1.19547	-0.0420523	-1.02859	0.582229
+	3.01212	1.40181	sp|O60870|KIN17_HUMAN	KIN	DNA/RNA-binding protein KIN17			n[305]TIGSSAS[167]VK	Color2 [DarkGray]	1	4		25818628	0.384769	2.00248	0.651213	1.70844	0.643271	2.17377
+	2.53313	1.40129	sp|Q14126|DSG2_HUMAN	DSG2	Desmoglein-2			n[305]VVPSFLPVDQGGS[167]LVGR	Color2 [DarkGray]	1	4		78896768	-0.430189	1.26928	0.255633	1.22326	-0.0365753	1.50019
+	2.37975	1.39967	sp|O43194|GPR39_HUMAN	GPR39	G-protein coupled receptor 39			n[305]GS[167]LAGGTRPPQLRK	Color2 [DarkGray]	1	4		2.85217e+06	-1.33007	0.0443382	-0.985553	-0.13789	-1.48947	0.48747
+	2.05595	1.39898	sp|P34910|EVI2B_HUMAN	EVI2B	Protein EVI2B			n[305]SPFADGETPDICMDNIRENEIS[167]TK	Color2 [DarkGray]	1	4		14256817	-0.442704	1.39743	0.309117	0.893801	-0.325272	1.44685
+	1.83023	1.39854	sp|Q14247|SRC8_HUMAN	CTTN	Src substrate cortactin			n[305]HES[167]QRDYSK	Color2 [DarkGray]	1	4		16682790	-1.58306	0.113783	-0.843838	-0.317044	-1.39325	0.578718
+	2.44317	1.39848	sp|P82979|SARNP_HUMAN	SARNP	SAP domain-containing ribonucleoprotein			n[305]FGLNVS[167]SISR	Color2 [DarkGray]	1	4		52387308	0.366664	1.79598	0.707771	1.53468	0.0991106	2.03832
+	2.29136	1.397	sp|P02686|MBP_HUMAN	MBP	Myelin basic protein			n[305]AS[167]TNSETNRGES[167]EKK	Color2 [DarkGray]	1	4		11278853	-0.0280819	1.53339	0.380869	1.13755	0.00635815	1.87922
+	2.34216	1.39631	sp|P27816|MAP4_HUMAN	MAP4	Microtubule-associated protein 4			n[305]STS[167]TSSM[147]KK	Color2 [DarkGray]	1	4		1.98076e+06	-1.63677	-0.460436	-1.833	-0.815455	-2.13472	-0.139672
+	2.51171	1.39601	sp|Q8IVF2|AHNK2_HUMAN	AHNAK2	Protein AHNAK2			n[305]VEMPS[167]FK	Color2 [DarkGray]	1	4		10134339	-1.36802	0.50662	-0.724853	0.376039	-0.723616	0.488875
+	2.19337	1.3945	sp|Q7Z6I8|CE024_HUMAN	C5orf24	UPF0461 protein C5orf24			n[305]NLNRS[167]GK	Color2 [DarkGray]	1	4		23222236	1.9878	3.59357	2.53299	3.3135	2.25579	4.053
+	2.56625	1.39417	sp|Q6PJT7|ZC3HE_HUMAN	ZC3H14	Zinc finger CCCH domain-containing protein 14			n[305]LQFQQQQNS[167]IHAAK	Color2 [DarkGray]	1	4		25903076	0.255207	1.74945	0.648134	1.4872	0.114942	1.96413
+	2.79964	1.39161	sp|P27816|MAP4_HUMAN	MAP4	Microtubule-associated protein 4			n[305]MAYQEY[243]PNSQNWPEDTNFCFQPEQVVDPIQTDPFK	Color2 [DarkGray]	1	4		12581334	-0.708029	0.913047	-0.551679	0.429181	-0.580534	0.992349
+	2.11669	1.39148	sp|Q13243|SRSF5_HUMAN	SRSF5	Serine/arginine-rich splicing factor 5			n[305]Y[243]SDRFSSR	Color2 [DarkGray]	1	4		17836316	-1.0891	0.742781	-0.449928	0.244948	-0.698083	0.949586
+	3.38714	1.39037	sp|Q6P4F7|RHGBA_HUMAN	ARHGAP11A	Rho GTPase-activating protein 11A			n[305]TPVRQS[167]VRR	Color2 [DarkGray]	1	4		4.30955e+06	-0.608582	0.646501	-0.796667	0.489598	-0.743546	0.886215
+	2.53635	1.39029	sp|Q6PJF5|RHDF2_HUMAN	RHBDF2	Inactive rhomboid protein 2			n[305]RQAS[167]LSQS[167]IRK	Color2 [DarkGray]	1	4		17081390	0.64418	2.12237	1.1254	1.98916	0.62552	2.45445
+	2.10031	1.39014	sp|O75116|ROCK2_HUMAN	ROCK2	Rho-associated protein kinase 2			n[305]KPPAPDPFARS[167]S[167]PRTSMK	Color2 [DarkGray]	1	4		12323934	-0.224196	1.14324	0.281283	1.20079	0.0128136	1.89628
+	2.81822	1.38967	sp|Q659C4|LAR1B_HUMAN	LARP1B	La-related protein 1B			n[305]S[167]VPPTDFSQLIDCPEFVPGQAFCSHTESAPNS[167]PR	Color2 [DarkGray]	1	4		3.58596e+06	-1.02044	0.207747	-0.868499	0.446259	-0.830907	0.795159
+	2.77739	1.38951	sp|P35221|CTNA1_HUMAN	CTNNA1	Catenin alpha-1			n[305]LLEPLVTQVTTLVNTNS[167]K	Color2 [DarkGray]	1	4		58409668	0.472493	1.78095	0.273497	1.42496	0.317455	2.02606
+	1.89511	1.38892	sp|O15525|MAFG_HUMAN	MAFG	Transcription factor MafG	MAFF, MAFK	sp|O60675|MAFK_HUMAN, sp|Q9ULX9|MAFF_HUMAN	n[305]NRGY[243]AASCR	Color2 [DarkGray]	1	4		2.50815e+06	-0.790992	0.558947	-0.454831	0.3047	-0.732438	1.32486
+	1.92072	1.38583	sp|Q86XE3|MICU3_HUMAN	MICU3	Calcium uptake protein 3, mitochondrial			n[305]NT[181]SQALFSDLAER	Color2 [DarkGray]	1	4		388319	-3.95971	-2.60218	-4.84563	-3.12655	-4.11416	-3.03329
+	1.9806	1.38528	sp|O75937|DNJC8_HUMAN	DNAJC8	DnaJ homolog subfamily C member 8			n[305]DGRVDS[167]WRNFQANTK	Color2 [DarkGray]	1	4		7459107	-1.38876	0.346695	-0.836237	-0.15724	-1.00946	0.731925
+	2.40113	1.38442	sp|O43143|DHX15_HUMAN	DHX15	Pre-mRNA-splicing factor ATP-dependent RNA helicase DHX15			n[305]HRLDLGEDYPS[167]GK	Color2 [DarkGray]	1	4		1.70866e+06	-1.70989	-0.0652523	-1.53835	-0.689589	-1.6242	0.0356779
+	2.13642	1.38405	sp|Q09666|AHNK_HUMAN	AHNAK	Neuroblast differentiation-associated protein AHNAK			n[305]LQVT[181]MPGIK	Color2 [DarkGray]	1	4		7018608	-2.12795	-0.487487	-1.79402	-1.07302	-1.98929	-0.198606
+	1.79672	1.3834	sp|Q99590|SCAFB_HUMAN	SCAF11	Protein SCAF11			n[305]KQTSGTS[167]NTRGSR	Color2 [DarkGray]	1	4		5505751	-1.25056	0.26841	-0.982208	-0.329098	-1.14388	0.834251
+	2.83538	1.38229	sp|Q08AD1|CAMP2_HUMAN	CAMSAP2	Calmodulin-regulated spectrin-associated protein 2			n[305]S[167]IHRDHIESPK	Color2 [DarkGray]	1	4		76493544	0.637519	2.02024	0.896274	1.97666	0.794853	2.47863
+	2.37094	1.38007	sp|Q86U42|PABP2_HUMAN	PABPN1	Polyadenylate-binding protein 2			n[305]T[181]TNYNSSR	Color2 [DarkGray]	1	4		2.02838e+06	-1.46154	0.00861454	-1.41009	-0.541984	-1.56364	0.238305
+	1.5184	1.37981	sp|Q96A33|CCD47_HUMAN	CCDC47	Coiled-coil domain-containing protein 47			n[305]QEAAQS[167]RREEK	Color2 [DarkGray]	1	4		11524134	-0.294679	1.60191	0.71238	0.927141	-0.201959	1.82612
+	1.94527	1.37836	sp|Q9UEW8|STK39_HUMAN	STK39	STE20/SPS1-related proline-alanine-rich protein kinase			n[305]VPGS[167]S[167]GHLHK	Color2 [DarkGray]	1	4		2586264	-2.85394	-0.908671	-2.10537	-0.829753	-1.81495	-0.90075
+	2.25745	1.37693	sp|P50552|VASP_HUMAN	VASP	Vasodilator-stimulated phosphoprotein			n[305]VPAQS[167]ESVRRPWEK	Color2 [DarkGray]	1	4		40933052	0.0353518	1.76813	0.560797	1.24094	0.163675	1.88154
+	1.65182	1.37645	sp|Q9Y3T9|NOC2L_HUMAN	NOC2L	Nucleolar complex protein 2 homolog			n[305]GILRPLS[167]TR	Color2 [DarkGray]	1	4		7.03768e+06	-2.31678	0.0668087	-1.53345	-0.92886	-1.62041	-0.479239
+	2.37442	1.37321	sp|Q09666|AHNK_HUMAN	AHNAK	Neuroblast differentiation-associated protein AHNAK			n[305]M[147]PS[167]MNIQTHK	Color2 [DarkGray]	1	4		3.64254e+06	-1.56843	0.106444	-1.2932	-0.431024	-1.29561	0.286953
+	1.82519	1.37198	sp|Q8WWI1|LMO7_HUMAN	LMO7	LIM domain only protein 7			n[305]NRS[167]VSGK	Color2 [DarkGray]	1	4		9842359	-0.504698	0.884641	-0.275832	0.389796	-0.549979	1.511
+	1.94349	1.37081	sp|P02786|TFR1_HUMAN	TFRC	Transferrin receptor protein 1			n[305]SAFSNLFGGEPLSYTRFS[167]LAR	Color2 [DarkGray]	1	4		237746880	4.53107	6.12213	5.03817	5.72815	4.83442	6.66581
+	2.69577	1.36929	sp|Q86T82|UBP37_HUMAN	USP37	Ubiquitin carboxyl-terminal hydrolase 37			n[305]VLGNPGRGS[167]IK	Color2 [DarkGray]	1	4		10831105	0.0602531	1.62819	0.383014	1.25691	0.155048	1.82109
+	2.80873	1.36748	sp|Q86UU1|PHLB1_HUMAN	PHLDB1	Pleckstrin homology-like domain family B member 1			n[305]SESPRLS[167]RK	Color2 [DarkGray]	1	4		10002994	0.716922	2.36473	1.02878	2.04777	1.07919	2.51482
+	2.33894	1.36746	sp|P51858|HDGF_HUMAN	HDGF	Hepatoma-derived growth factor			n[305]AS[167]GYQSSQK	Color2 [DarkGray]	1	4		18820214	-0.466272	1.49524	0.225513	1.10726	0.0767756	1.33588
+	2.57213	1.36711	sp|Q96HC4|PDLI5_HUMAN	PDLIM5	PDZ and LIM domain protein 5			n[305]APRPFGS[167]VSSPK	Color2 [DarkGray]	1	4		51261124	0.184489	1.87244	0.839687	1.78199	0.578862	2.04993
+	2.55466	1.36647	sp|Q09666|AHNK_HUMAN	AHNAK	Neuroblast differentiation-associated protein AHNAK			n[305]GGADVSGGVSAPDISLGEGHLS[167]VK	Color2 [DarkGray]	1	4		97054536	-1.069	0.0344687	-1.22057	0.0642271	-1.0579	0.653262
+	2.82481	1.36633	sp|Q9UHB6|LIMA1_HUMAN	LIMA1	LIM domain and actin-binding protein 1			n[305]S[167]RPFTVAASFQSTSVKS[167]PK	Color2 [DarkGray]	1	4		6.79726e+06	-0.0899076	1.17766	0.0375762	1.06925	-0.196744	1.60301
+	2.41737	1.36599	sp|Q15691|MARE1_HUMAN	MAPRE1	Microtubule-associated protein RP/EB family member 1			n[305]KPLT[181]SSSAAPQRPISTQR	Color2 [DarkGray]	1	4		13065618	-1.3244	0.501215	-0.574831	0.279832	-0.960585	0.457096
+	3.55629	1.36542	sp|Q12959|DLG1_HUMAN	DLG1	Disks large homolog 1			n[305]EQMMNSSISSGSGSLRT[181]S[167]QK	Color2 [DarkGray]	1	4		10037532	0.352247	1.89717	0.62013	1.71991	0.546257	1.9978
+	2.55143	1.36431	sp|P27816|MAP4_HUMAN	MAP4	Microtubule-associated protein 4			n[305]STST[181]SSMKK	Color2 [DarkGray]	1	4		2.05068e+06	-0.681754	0.708289	-0.525856	0.410279	-0.657192	1.10955
+	2.40826	1.36426	sp|O60353|FZD6_HUMAN	FZD6	Frizzled-6			n[305]RVLQES[167]CEFFLK	Color2 [DarkGray]	1	4		8054077	0.615787	1.90184	0.749856	1.60672	0.277125	2.22698
+	2.21812	1.3638	sp|Q92917|GPKOW_HUMAN	GPKOW	G-patch domain and KOW motifs-containing protein			n[305]VNS[167]LRPK	Color2 [DarkGray]	1	4		11984398	1.11105	2.51575	1.13401	2.09556	1.24793	2.97307
+	2.34731	1.36338	sp|Q9NQW6|ANLN_HUMAN	ANLN	Anillin			n[305]RLLTS[167]ITTK	Color2 [DarkGray]	1	4		5512776	-0.641671	0.890489	-0.236961	0.762939	-0.181736	1.37634
+	2.6795	1.36305	sp|Q9NP61|ARFG3_HUMAN	ARFGAP3	ADP-ribosylation factor GTPase-activating protein 3			n[305]ATLEVSS[167]IIK	Color2 [DarkGray]	1	4		2.932e+06	-2.01457	-0.562729	-1.87644	-0.946693	-2.011	-0.303433
+	1.5901	1.36282	sp|O95819|M4K4_HUMAN	MAP4K4	Mitogen-activated protein kinase kinase kinase kinase 4			n[305]DS[167]PLQGSGQQNSQAGQR	Color2 [DarkGray]	1	4		140107952	-1.38613	0.244964	-0.223164	0.331131	-1.06173	0.841325
+	2.12697	1.36259	sp|Q96JM2|ZN462_HUMAN	ZNF462	Zinc finger protein 462			n[305]NIT[181]HDYNATNGAEIELTLSEDEEDYYGSSTNLK	Color2 [DarkGray]	1	4		0	-5.11992	-3.23672	-4.64029	-3.23623	-4.19476	-3.39424
+	2.55502	1.36234	sp|Q86TB9|PATL1_HUMAN	PATL1	Protein PAT1 homolog 1			n[305]NLNGAGDRGS[167]HR	Color2 [DarkGray]	1	4		7.01509e+06	-1.30659	0.13856	-1.44206	-0.256994	-1.09411	0.362676
+	2.62211	1.36158	sp|Q8WVE6|TM171_HUMAN	TMEM171	Transmembrane protein 171			n[305]ENAAATFLPLSSEPS[167]PP	Color2 [DarkGray]	1	4		7.63324e+06	-2.71288	-1.65481	-3.37869	-1.73078	-2.96056	-1.58179
+	3.27661	1.36105	sp|Q92878|RAD50_HUMAN	RAD50	DNA repair protein RAD50	NDUFAF4	sp|Q9P032|NDUF4_HUMAN	n[305]AERELS[167]K	Color2 [DarkGray]	1	4		2957069	-0.639689	0.788921	-0.355277	0.695612	-0.56075	1.0429
+	2.958	1.36038	sp|Q9C0B5|ZDHC5_HUMAN	ZDHHC5	Palmitoyltransferase ZDHHC5			n[305]S[167]AQGT[181]GFELGQLQSIRSEGTTSTSYK	Color2 [DarkGray]	1	4		3.89112e+06	-1.75011	-0.233757	-1.41465	-0.397072	-1.50727	0.0399313
+	2.78161	1.35902	sp|Q86XP3|DDX42_HUMAN	DDX42	ATP-dependent RNA helicase DDX42			n[305]YTENRGS[167]SR	Color2 [DarkGray]	1	4		32687262	0.0412521	1.65575	0.283812	1.1794	0.127145	1.69411
+	2.7808	1.35816	sp|O14974|MYPT1_HUMAN	PPP1R12A	Protein phosphatase 1 regulatory subunit 12A			n[305]RLAS[167]TS[167]DIEEK	Color2 [DarkGray]	1	4		8.02196e+06	0.44479	1.95061	0.96339	2.20928	0.869642	2.1924
+	3.82918	1.35759	sp|Q8N1W1|ARG28_HUMAN	ARHGEF28	Rho guanine nucleotide exchange factor 28			n[305]T[181]FSFLMNR	Color2 [DarkGray]	1	4		63417044	2.97996	4.45392	3.16373	4.24962	2.95999	4.47292
+	2.77603	1.35747	sp|Q9BYV8|CEP41_HUMAN	CEP41	Centrosomal protein of 41 kDa			n[305]LNQANS[167]SGRESK	Color2 [DarkGray]	1	4		20870254	1.32311	2.85874	1.70048	2.63302	1.5265	3.13074
+	1.72889	1.35671	sp|Q96IZ0|PAWR_HUMAN	PAWR	PRKC apoptosis WT1 regulator protein			n[305]REDAITQQNTIQNEAVNLLDPGSSYLLQEPPRT[181]VSGR	Color2 [DarkGray]	1	4		11229921	-0.210537	0.818848	-1.06768	0.175885	-0.808432	0.988745
+	2.25896	1.35668	sp|Q8ND25|ZNRF1_HUMAN	ZNRF1	E3 ubiquitin-protein ligase ZNRF1			n[305]WFS[167]SHSGFK	Color2 [DarkGray]	1	4		2817382	-1.39719	0.286936	-1.11567	-0.278359	-1.07076	0.477827
+	1.36649	1.35612	sp|Q8IVF2|AHNK2_HUMAN	AHNAK2	Protein AHNAK2			n[305]VQMPS[167]LK	Color2 [DarkGray]	1	4		8762541	-2.70444	-1.68897	-2.52662	-1.87995	-3.96977	-1.56355
+	2.18914	1.35434	sp|Q9Y6M7|S4A7_HUMAN	SLC4A7	Sodium bicarbonate cotransporter 3			n[305]AVYIGVHVPFSKES[167]R	Color2 [DarkGray]	1	4		17792028	-1.67614	-0.0129519	-1.25761	-0.502222	-1.3663	0.278156
+	2.62084	1.35347	sp|Q9UNZ2|NSF1C_HUMAN	NSFL1C	NSFL1 cofactor p47			n[305]FY[243]AGGSER	Color2 [DarkGray]	1	4		33572420	1.83456	3.24502	1.4501	2.74539	1.80671	3.16136
+	3.09691	1.35309	sp|Q15459|SF3A1_HUMAN	SF3A1	Splicing factor 3A subunit 1	CUL9	sp|Q8IWT3|CUL9_HUMAN	n[305]DRS[167]IREK	Color2 [DarkGray]	1	4		57400044	2.4469	3.99244	2.80571	3.76588	2.56974	4.1233
+	2.24261	1.35277	sp|P16989|YBOX3_HUMAN	YBX3	Y-box-binding protein 3			n[305]ENQQAT[181]SGPNQPSVR	Color2 [DarkGray]	1	4		13169474	0.662126	2.1978	0.707349	1.61055	0.821011	2.44044
+	2.11937	1.35055	sp|Q7Z698|SPRE2_HUMAN	SPRED2	Sprouty-related, EVH1 domain-containing protein 2			n[305]GRGGS[167]VIK	Color2 [DarkGray]	1	4		48995380	2.27838	3.95387	3.08197	3.75488	2.47865	4.1819
+	4.23914	1.34894	sp|Q92597|NDRG1_HUMAN	NDRG1	Protein NDRG1			n[305]T[181]ASGSS[167]VTSLDGTR	Color2 [DarkGray]	1	4		28760480	1.77131	3.03368	1.63034	2.92083	1.55217	3.04611
+	1.68472	1.34708	sp|O15118|NPC1_HUMAN	NPC1	NPC intracellular cholesterol transporter 1			n[305]YKGT[181]ERER	Color2 [DarkGray]	1	4		14679302	-0.210164	1.28977	0.390236	0.866901	-0.129313	1.93531
+	2.89861	1.34639	sp|Q8IWX8|CHERP_HUMAN	CHERP	Calcium homeostasis endoplasmic reticulum protein			n[305]S[167]YSFIAR	Color2 [DarkGray]	1	4		46067216	2.35833	3.78002	2.52375	3.4433	2.22266	3.92058
+	2.05765	1.34618	sp|P51858|HDGF_HUMAN	HDGF	Hepatoma-derived growth factor			n[305]AS[167]GYQSSQKK	Color2 [DarkGray]	1	4		1.32552e+06	-2.48708	-0.859581	-2.1899	-1.53719	-2.41176	-0.653422
+	2.97005	1.34392	sp|Q02040|AK17A_HUMAN	AKAP17A	A-kinase anchor protein 17A	CLEC4G	sp|Q6UXB4|CLC4G_HUMAN	n[305]LLS[167]ILLSK	Color2 [DarkGray]	1	4		2.26102e+06	-2.02109	-0.541667	-1.694	-0.78672	-2.08444	-0.439376
+	2.8489	1.34377	sp|Q9UNF1|MAGD2_HUMAN	MAGED2	Melanoma-associated antigen D2	GRIK5, PKDREJ	rev_sp|Q6PDB4|ZN880_HUMAN, sp|Q16478|GRIK5_HUMAN, sp|Q9NTG1|PKDRE_HUMAN	n[305]RALLS[167]LR	Color2 [DarkGray]	1	4		5210695	-0.013937	1.6489	0.428268	1.36286	0.291131	1.72501
+	1.45642	1.34364	sp|Q9NW07|ZN358_HUMAN	ZNF358	Zinc finger protein 358			n[305]S[167]SGLSQHRR	Color2 [DarkGray]	1	4		280150	-3.96215	-2.08479	-3.03048	-2.41169	-2.97661	-1.44185
+	1.87387	1.34267	sp|Q9H2J4|PDCL3_HUMAN	PDCL3	Phosducin-like protein 3			n[305]KPIEDVLLSS[167]VRR	Color2 [DarkGray]	1	4		3416127	-2.14119	-0.591967	-1.4116	-0.843049	-1.98085	-0.0706244
+	2.15145	1.3425	sp|Q01804|OTUD4_HUMAN	OTUD4	OTU domain-containing protein 4			n[305]QFY[243]NQTYGSRK	Color2 [DarkGray]	1	4		134535760	-0.41374	1.12623	0.187866	0.909527	-0.186524	1.57933
+	2.91415	1.34196	sp|Q68EM7|RHG17_HUMAN	ARHGAP17	Rho GTPase-activating protein 17			n[305]GGT[181]LNRK	Color2 [DarkGray]	1	4		16998814	1.29417	2.81239	1.64244	2.63704	1.55847	3.07155
+	2.29568	1.34105	sp|Q96KB5|TOPK_HUMAN	PBK	Lymphokine-activated killer T-cell-originated protein kinase			n[305]TPSKLS[167]EK	Color2 [DarkGray]	1	4		60240172	0.783932	2.27588	1.30416	2.01843	0.766658	2.58358
+	3.41283	1.34076	sp|Q6SPF0|SAMD1_HUMAN	SAMD1	Atherin			n[305]AVLRVS[167]YK	Color2 [DarkGray]	1	4		11968569	-0.117829	1.3953	0.0138659	1.15091	0.117528	1.48962
+	2.08159	1.33924	sp|Q9NZW5|MPP6_HUMAN	MPP6	MAGUK p55 subfamily member 6			n[305]DWDNS[167]GPFCGTISSKK	Color2 [DarkGray]	1	4		1.46049e+06	-1.17607	0.310438	-0.803677	-0.152389	-1.18298	0.696959
+	2.03657	1.33812	sp|Q99590|SCAFB_HUMAN	SCAF11	Protein SCAF11			n[305]QTSGTS[167]NTRGSR	Color2 [DarkGray]	1	4		20372750	-2.32097	-0.424603	-1.56691	-0.960796	-1.91894	-0.407076
+	2.52622	1.33662	sp|Q09666|AHNK_HUMAN	AHNAK	Neuroblast differentiation-associated protein AHNAK			n[305]IHM[147]S[167]GPK	Color2 [DarkGray]	1	4		44517600	-0.0392952	1.47209	0.441904	1.24753	0.0615196	1.75438
+	2.17895	1.33628	sp|Q9BZE9|ASPC1_HUMAN	ASPSCR1	Tether containing UBX domain for GLUT4			n[305]LGGPPGPTRPLTS[167]SSAK	Color2 [DarkGray]	1	4		9072483	-1.79316	-0.449615	-1.38859	-0.64453	-1.85129	0.0699387
+	2.0021	1.33351	sp|Q09666|AHNK_HUMAN	AHNAK	Neuroblast differentiation-associated protein AHNAK			n[305]FPKFS[167]MPK	Color2 [DarkGray]	1	4		2.5553e+06	-0.835852	0.442047	-0.57697	0.194264	-0.832875	1.11852
+	2.1559	1.33341	sp|Q9P2N5|RBM27_HUMAN	RBM27	RNA-binding protein 27			n[305]LQIS[167]WHKPK	Color2 [DarkGray]	1	4		3773447	-0.381337	0.839035	-0.568753	0.486575	-0.366096	1.35843
+	2.38419	1.33277	sp|Q96MS0|ROBO3_HUMAN	ROBO3	Roundabout homolog 3			n[305]SQS[167]QRPGQK	Color2 [DarkGray]	1	4		9165087	0.564349	2.15859	0.974888	1.83962	0.937586	2.47693
+	2.6148	1.33037	sp|Q9UHB6|LIMA1_HUMAN	LIMA1	LIM domain and actin-binding protein 1			n[305]KIS[167]ENS[167]YSLDDLEIGPGQLSSSTFDSEK	Color2 [DarkGray]	1	4		15047196	-0.0571756	1.20875	NaN	1.39908	0.14731	1.51847
+	3.3946	1.33033	sp|Q9H6T3|RPAP3_HUMAN	RPAP3	RNA polymerase II-associated protein 3			n[305]SYDY[243]EAWAK	Color2 [DarkGray]	1	4		4500203	-1.14733	0.194329	-1.03767	-0.0056591	-1.34338	0.273932
+	2.66456	1.32922	sp|Q09666|AHNK_HUMAN	AHNAK	Neuroblast differentiation-associated protein AHNAK			n[305]FSM[147]PS[167]LK	Color2 [DarkGray]	1	4		4.21105e+06	-0.724363	0.631684	-0.688124	0.241801	-0.825437	0.876247
+	2.85031	1.32915	sp|Q8IVF2|AHNK2_HUMAN	AHNAK2	Protein AHNAK2			n[305]LPS[167]FRWS[167]PKK	Color2 [DarkGray]	1	4		3330425	-1.1575	0.396478	-0.607428	0.350608	-0.945432	0.530006
+	2.49092	1.32684	sp|Q09666|AHNK_HUMAN	AHNAK	Neuroblast differentiation-associated protein AHNAK			n[305]GKFS[167]LFK	Color2 [DarkGray]	1	4		2.62566e+06	0.122218	1.68285	0.363902	1.34639	0.517712	1.95512
+	3.35757	1.3261	sp|P98179|RBM3_HUMAN	RBM3	RNA-binding protein 3			n[305]GGGDQGY[243]GSGR	Color2 [DarkGray]	1	4		10741565	0.46522	1.95873	0.448192	1.61988	0.628957	1.94206
+	1.76335	1.32561	sp|O95817|BAG3_HUMAN	BAG3	BAG family molecular chaperone regulator 3			n[305]GY[243]ISIPVIHEQNVTRPAAQPSFHQAQK	Color2 [DarkGray]	1	4		16264007	0.0918303	1.56729	0.883923	1.50089	0.3881	2.27252
+	2.97097	1.32541	sp|Q5T0Z8|CF132_HUMAN	C6orf132	Uncharacterized protein C6orf132			n[305]FS[167]GGGRSLIK	Color2 [DarkGray]	1	4		7984619	0.143431	1.51304	0.34245	1.26846	0.0231028	1.7037
+	2.7245	1.32439	sp|Q9NR56|MBNL1_HUMAN	MBNL1	Muscleblind-like protein 1	MBNL2	sp|Q5VZF2|MBNL2_HUMAN	n[305]VIACFDS[167]LK	Color2 [DarkGray]	1	4		3.16984e+06	-1.42735	-0.331367	-1.19651	0.16534	-1.58031	-0.0649796
+	2.28667	1.3234	sp|Q9NQW6|ANLN_HUMAN	ANLN	Anillin			n[305]STLS[167]QTVPSK	Color2 [DarkGray]	1	4		9515972	-0.0773878	1.79563	0.467451	1.53103	0.145232	1.17884
+	3.77738	1.32301	sp|Q96B36|AKTS1_HUMAN	AKT1S1	Proline-rich AKT1 substrate 1			n[305]LNT[181]SDFQK	Color2 [DarkGray]	1	4		222161776	-1.23456	0.188077	-1.08995	0.335184	-1.06961	0.0516586
+	2.06831	1.3229	sp|P09651|ROA1_HUMAN	HNRNPA1	Heterogeneous nuclear ribonucleoprotein A1			n[305]NQGGYGGS[167]SSSSSYGSGR	Color2 [DarkGray]	1	4		87466960	-1.74248	-0.156747	-1.70102	-0.939929	-1.70407	-0.08218
+	1.89595	1.32208	sp|O43242|PSMD3_HUMAN	PSMD3	26S proteasome non-ATPase regulatory subunit 3			n[305]MKQEGS[167]AR	Color2 [DarkGray]	1	4		23465872	1.31997	2.45417	1.27801	2.13345	1.19073	3.16733
+	2.64623	1.32195	sp|Q9BY42|RTF2_HUMAN	RTF2	Replication termination factor 2			n[305]SLFTTHSS[167]AK	Color2 [DarkGray]	1	4		20954132	0.599117	2.09862	0.672983	1.60221	0.680974	2.21809
+	2.40148	1.32116	sp|Q9NWB6|ARGL1_HUMAN	ARGLU1	Arginine and glutamate-rich protein 1			n[305]ST[181]NTAVSRR	Color2 [DarkGray]	1	4		1889119	-2.32758	-0.681561	-1.9192	-1.20191	-2.44629	-0.846117
+	3.81632	1.32025	sp|Q14119|VEZF1_HUMAN	VEZF1	Vascular endothelial zinc finger 1			n[305]RHES[167]CHTGIK	Color2 [DarkGray]	1	4		4.08223e+06	-0.166683	1.0976	-0.253124	0.914742	-0.34431	1.1843
+	2.56553	1.31889	sp|P26651|TTP_HUMAN	ZFP36	mRNA decay activator protein ZFP36			n[305]S[167]TSLVEGR	Color2 [DarkGray]	1	4		31088716	0.502736	2.16366	0.583425	1.52181	0.367486	1.72485
+	2.44407	1.3184	sp|O60934|NBN_HUMAN	NBN	Nibrin			n[305]TTTPGPSLS[167]QGVSVDEK	Color2 [DarkGray]	1	4		50313940	0.542385	2.29517	1.13026	2.37754	1.15398	2.10911
+	2.00316	1.31814	sp|Q6IQ49|SDE2_HUMAN	SDE2	Replication stress response regulator SDE2			n[305]FPS[167]GSQR	Color2 [DarkGray]	1	4		22590234	-1.14439	0.253565	-0.844058	-0.251724	-1.53347	0.43066
+	1.76394	1.31767	sp|P49757|NUMB_HUMAN	NUMB	Protein numb homolog	NUMBL	sp|Q9Y6R0|NUMBL_HUMAN	n[305]GFPALS[167]QK	Color2 [DarkGray]	1	4		3.39983e+06	-2.6037	-0.472868	-1.65937	-1.15201	-2.10465	-0.789818
+	2.92131	1.31626	sp|Q9UHD8|SEPT9_HUMAN	SEPTIN9	Septin-9			n[305]RTEIT[181]IVKPQESAHRR	Color2 [DarkGray]	1	4		15518452	-1.51285	-0.0509863	-1.12997	-0.234768	-1.45517	0.136549
+	1.8278	1.31623	sp|Q07157|ZO1_HUMAN	TJP1	Tight junction protein ZO-1			n[305]FRGLRS[167]SK	Color2 [DarkGray]	1	4		2.94321e+06	0.0621328	1.55155	0.551176	1.2007	0.373755	2.18349
+	4.37942	1.31609	sp|Q9Y3B9|RRP15_HUMAN	RRP15	RRP15-like protein			n[305]EAGS[167]SM[147]RK	Color2 [DarkGray]	1	4		2.09675e+06	-1.7065	-0.289268	-1.72251	-0.517131	-1.68817	-0.362515
+	2.61106	1.31574	sp|Q8IWC1|MA7D3_HUMAN	MAP7D3	MAP7 domain-containing protein 3			n[305]DTSIQEVVSRPSS[167]K	Color2 [DarkGray]	1	4		12873474	0.998797	2.5536	1.18546	2.09339	1.21086	2.69535
+	3.39998	1.31437	sp|Q14644|RASA3_HUMAN	RASA3	Ras GTPase-activating protein 3			n[305]TNNPQFDEVFYFEVTRPCS[167]YSK	Color2 [DarkGray]	1	4		11879545	0.603674	1.95654	0.933285	2.16511	0.818769	2.17718
+	2.64074	1.31414	sp|Q99661|KIF2C_HUMAN	KIF2C	Kinesin-like protein KIF2C			n[305]GSSSANPVNS[167]VR	Color2 [DarkGray]	1	4		108915576	0.207193	1.29382	-0.0229831	1.05636	-0.223166	1.55328
+	4.0284	1.31411	sp|Q9NVD7|PARVA_HUMAN	PARVA	Alpha-parvin			n[305]DDS[167]FLGK	Color2 [DarkGray]	1	4		27005110	2.2053	3.40683	2.0321	3.29847	1.9668	3.44124
+	1.2443	1.31305	sp|Q8NDV7|TNR6A_HUMAN	TNRC6A	Trinucleotide repeat-containing gene 6A protein			n[305]T[181]FTNGWKSTEEEDQGSATSQTNEQSSVWAK	Color2 [DarkGray]	1	4		3314537	-0.552421	-0.524999	-2.01833	-0.0203724	-1.7564	0.157364
+	1.58291	1.31081	sp|P17844|DDX5_HUMAN	DDX5	Probable ATP-dependent RNA helicase DDX5			n[305]DRENYDRGY[243]SSLLK	Color2 [DarkGray]	1	4		5.81809e+06	-1.55087	-0.189338	-0.937118	-0.514959	-1.59894	0.549788
+	3.22555	1.31014	sp|Q8NE01|CNNM3_HUMAN	CNNM3	Metal transporter CNNM3			n[305]RKPAS[167]LM[147]APLK	Color2 [DarkGray]	1	4		5.22191e+06	0.0619383	1.38559	-0.0613179	1.16471	0.177043	1.55777
+	1.95861	1.31	sp|O95817|BAG3_HUMAN	BAG3	BAG family molecular chaperone regulator 3			n[305]AASPFRSS[167]VQGASSR	Color2 [DarkGray]	1	4		58985428	1.98574	3.58473	1.92992	2.94658	2.43528	3.74962
+	2.69103	1.30992	sp|P41208|CETN2_HUMAN	CETN2	Centrin-2			n[305]ANM[147]ASSS[167]QRK	Color2 [DarkGray]	1	4		30156282	1.51922	2.94824	1.48281	2.4322	1.45554	3.0069
+	2.00238	1.30953	sp|Q6NYC8|PPR18_HUMAN	PPP1R18	Phostensin			n[305]WTLNS[167]GK	Color2 [DarkGray]	1	4		1.76165e+06	-1.88576	-0.613936	-1.86669	-1.03526	-1.88026	-0.0549459
+	2.69263	1.30913	sp|Q8IVF2|AHNK2_HUMAN	AHNAK2	Protein AHNAK2			n[305]VQM[147]PS[167]LK	Color2 [DarkGray]	1	4		2619610	-2.07261	-0.575284	-1.56834	-0.730294	-1.99178	-0.399756
+	3.55744	1.30853	sp|Q14315|FLNC_HUMAN	FLNC	Filamin-C			n[305]S[167]SHTYTR	Color2 [DarkGray]	1	4		31483350	-0.0134459	1.33269	-0.0241961	1.04833	-0.134974	1.37194
+	2.79748	1.30764	sp|P02686|MBP_HUMAN	MBP	Myelin basic protein			n[305]AS[167]TNSETNRGES[167]EK	Color2 [DarkGray]	1	4		38751056	3.36658	4.85557	3.67671	4.52797	3.43258	5.01524
+	2.26806	1.30731	sp|O94804|STK10_HUMAN	STK10	Serine/threonine-protein kinase 10			n[305]RILRLS[167]TFEK	Color2 [DarkGray]	1	4		3.86432e+06	-0.810775	1.035	-0.167998	0.836133	-0.0782261	0.993814
+	2.37962	1.30536	sp|Q13428|TCOF_HUMAN	TCOF1	Treacle protein			n[305]T[181]ETLVEETAAESSEDDVVAPSQSLLSGYMTPGLTPANSQASK	Color2 [DarkGray]	1	4		0	-1.88028	-1.04777	-1.84472	-0.527185	-2.19987	-0.433835
+	1.85421	1.30343	sp|Q14938|NFIX_HUMAN	NFIX	Nuclear factor 1 X-type			n[305]Y[243]HHHHGQDSLK	Color2 [DarkGray]	1	4		1.5475e+06	-1.60464	0.0630054	-0.888435	-0.198355	-1.00212	0.550445
+	2.77151	1.30117	sp|Q9BQ61|TRIR_HUMAN	TRIR	Telomerase RNA component interacting RNase			n[305]GGPGSTLS[167]FVGK	Color2 [DarkGray]	1	4		21009634	1.49765	2.71197	1.45055	2.4971	1.44552	3.08817
+	3.52676	1.30076	sp|Q13017|RHG05_HUMAN	ARHGAP5	Rho GTPase-activating protein 5			n[305]IRNS[167]FVNNTQGDEENGFSDR	Color2 [DarkGray]	1	4		17380582	1.34041	2.44703	1.33067	2.75401	1.41083	2.78315
+	2.31605	1.30055	sp|O95817|BAG3_HUMAN	BAG3	BAG family molecular chaperone regulator 3			n[305]SSVQGAS[167]SR	Color2 [DarkGray]	1	4		8564209	-0.652326	1.04955	-0.421983	0.397001	-0.362543	1.01826
+	1.78482	1.30024	sp|O14672|ADA10_HUMAN	ADAM10	Disintegrin and metalloproteinase domain-containing protein 10			n[305]QRPRES[167]YQM[147]GHMR	Color2 [DarkGray]	1	4		9641487	-3.46009	-1.68298	-2.48947	-1.93167	-2.92032	-1.35453
+	2.30123	1.29806	sp|P34910|EVI2B_HUMAN	EVI2B	Protein EVI2B			n[305]S[167]PFADGETPDICM[147]DNIRENEISTK	Color2 [DarkGray]	1	4		5.89069e+06	0.283637	1.53104	0.54449	1.54102	0.532828	2.18306
+	3.12405	1.29798	sp|Q14669|TRIPC_HUMAN	TRIP12	E3 ubiquitin-protein ligase TRIP12			n[305]T[181]TGSCASTSR	Color2 [DarkGray]	1	4		3.44771e+06	-1.21713	0.0411844	-1.24978	-0.231952	-1.42623	0.191572
+	2.28347	1.29537	sp|Q5FWF5|ESCO1_HUMAN	ESCO1	N-acetyltransferase ESCO1			n[305]GYSQES[167]TKK	Color2 [DarkGray]	1	4		4.71423e+06	-0.816139	0.717344	-0.579176	0.410788	-0.315007	1.04766
+	2.4184	1.2942	sp|Q8WW12|PCNP_HUMAN	PCNP	PEST proteolytic signal-containing nuclear protein			n[305]HGFS[167]DNQK	Color2 [DarkGray]	1	4		9139322	-0.168529	1.36459	0.0974259	0.870471	-0.0362558	1.54019
+	3.04059	1.2928	sp|O14950|ML12B_HUMAN	MYL12B	Myosin regulatory light chain 12B	MYL12A, MYL9	sp|P19105|ML12A_HUMAN, sp|P24844|MYL9_HUMAN	n[305]ATSNVFAM[147]FDQS[167]QIQEFK	Color2 [DarkGray]	1	4		0	-1.19382	0.119617	-1.21697	-0.234101	-1.37315	0.208947
+	2.14084	1.29183	sp|O60285|NUAK1_HUMAN	NUAK1	NUAK family SNF1-like kinase 1			n[305]IRS[167]CVSAENFLQIQDFEGLQNRPRPQYLK	Color2 [DarkGray]	1	4		1.99121e+06	-1.50849	0.0644417	-1.64232	-0.72051	-1.41355	-0.0328007
+	1.70439	1.29058	sp|P07550|ADRB2_HUMAN	ADRB2	Beta-2 adrenergic receptor			n[305]AY[243]GNGY[243]SSNGNTGEQSGYHVEQEK	Color2 [DarkGray]	1	4		4713416	-1.82881	-0.101215	-1.08726	-0.383664	-1.04041	0.400122
+	1.93244	1.29011	sp|P25685|DNJB1_HUMAN	DNAJB1	DnaJ homolog subfamily B member 1			n[305]SRS[167]AQEPARK	Color2 [DarkGray]	1	4		3150995	-0.759591	1.28749	-0.0983806	0.640562	-0.0697193	1.01458
+	1.9719	1.28973	sp|Q96DR7|ARHGQ_HUMAN	ARHGEF26	Rho guanine nucleotide exchange factor 26			n[305]AVVSGFDFDSPTSS[167]K	Color2 [DarkGray]	1	4		44368684	0.790989	2.45913	1.72794	2.39136	1.10649	2.64413
+	2.86981	1.28951	sp|P78344|IF4G2_HUMAN	EIF4G2	Eukaryotic translation initiation factor 4 gamma 2			n[305]WIPARS[167]TR	Color2 [DarkGray]	1	4		2.07446e+06	-1.15712	0.456566	-0.849724	0.107857	-0.816789	0.480482
+	1.94305	1.28904	sp|P42167|LAP2B_HUMAN	TMPO	Lamina-associated polypeptide 2, isoforms beta/gamma			n[305]EM[147]FPYEASTPTGISAS[167]CRRPIK	Color2 [DarkGray]	1	4		7067174	-0.35324	1.09323	0.125142	0.753532	-0.161201	1.63105
+	2.49241	1.28867	sp|P51587|BRCA2_HUMAN	BRCA2	Breast cancer type 2 susceptibility protein			n[305]TSGNS[167]FK	Color2 [DarkGray]	1	4		2.34375e+06	-0.270939	0.999454	-0.358181	0.527262	-0.663108	1.04705
+	2.34725	1.28866	sp|Q5SVZ6|ZMYM1_HUMAN	ZMYM1	Zinc finger MYM-type protein 1			n[305]QQS[167]RTQENELK	Color2 [DarkGray]	1	4		9714832	-0.922257	0.780413	-0.840391	0.0579004	-0.701316	0.563714
+	1.75634	1.28791	sp|Q13177|PAK2_HUMAN	PAK2	Serine/threonine-protein kinase PAK 2			n[305]IISIFSGT[181]EK	Color2 [DarkGray]	1	4		0	-1.53936	-0.181101	-0.808554	0.067646	-0.981153	0.648107
+	2.50367	1.28725	sp|Q01484|ANK2_HUMAN	ANK2	Ankyrin-2			n[305]EAERNS[167]YR	Color2 [DarkGray]	1	4		1.85451e+06	-0.334537	0.639076	-1.01772	0.523708	-0.671493	0.675212
+	1.46159	1.28518	sp|P07900|HS90A_HUMAN	HSP90AA1	Heat shock protein HSP 90-alpha			n[305]LGLGIDEDDPTADDTSAAVTEEMPPLEGDDDT[181]SRMEEVD	Color2 [DarkGray]	1	4		7.99451e+06	-1.51131	0.13532	-1.6541	-0.904204	-1.14769	0.311332
+	2.71952	1.28376	sp|P35222|CTNB1_HUMAN	CTNNB1	Catenin beta-1			n[305]AAVMVHQLS[167]K	Color2 [DarkGray]	1	4		2.59113e+06	-1.51612	-0.319772	-1.18379	-0.223115	-1.68691	0.00733757
+	2.1248	1.28209	sp|Q09666|AHNK_HUMAN	AHNAK	Neuroblast differentiation-associated protein AHNAK			n[305]GDLDASVPS[167]MK	Color2 [DarkGray]	1	4		34367316	-0.223279	0.927303	0.0809093	0.920433	-0.225966	1.63019
+	1.9993	1.28172	sp|P78344|IF4G2_HUMAN	EIF4G2	Eukaryotic translation initiation factor 4 gamma 2			n[305]S[167]TRRDDNSAANNSANEK	Color2 [DarkGray]	1	4		1.00151e+06	-2.45787	-1.00817	-2.2342	-1.56485	-3.00029	-1.27418
+	2.62665	1.27652	sp|Q9C0B5|ZDHC5_HUMAN	ZDHHC5	Palmitoyltransferase ZDHHC5			n[305]S[167]AQGTGFELGQLQSIRS[167]EGTTSTSYK	Color2 [DarkGray]	1	4		2.39223e+06	-1.00776	-0.0165386	-1.55365	-0.173635	-1.28996	0.168367
+	3.17296	1.2764	sp|P48634|PRC2A_HUMAN	PRRC2A	Protein PRRC2A			n[305]WGPRPGS[167]SRR	Color2 [DarkGray]	1	4		112580152	2.89702	4.20345	2.9092	3.96668	2.95952	4.42482
+	2.60324	1.27617	sp|Q09666|AHNK_HUMAN	AHNAK	Neuroblast differentiation-associated protein AHNAK			n[305]FGTFGGLGS[167]K	Color2 [DarkGray]	1	4		612835328	-0.814453	0.447533	-0.505407	0.326729	-0.974813	0.759583
+	2.66791	1.2758	sp|O94804|STK10_HUMAN	STK10	Serine/threonine-protein kinase 10			n[305]ILRLS[167]TFEK	Color2 [DarkGray]	1	4		226085648	0.705741	2.36914	1.12501	2.09959	1.20491	2.39433
+	2.18258	1.27547	sp|Q9UNF1|MAGD2_HUMAN	MAGED2	Melanoma-associated antigen D2			n[305]ALLS[167]LRS[167]PK	Color2 [DarkGray]	1	4		4.0036e+06	-0.706185	0.539901	-0.715801	0.061491	-0.934834	0.868184
+	3.68155	1.2754	sp|Q76L83|ASXL2_HUMAN	ASXL2	Putative Polycomb group protein ASXL2			n[305]SFQRS[167]ER	Color2 [DarkGray]	1	4		2.65498e+06	-1.03878	0.276869	-0.976252	0.0909338	-1.01654	0.426837
+	1.6	1.27537	sp|Q96QE3|ATAD5_HUMAN	ATAD5	ATPase family AAA domain-containing protein 5			n[305]HSLYTAELITVPFDS[167]ESPIR	Color2 [DarkGray]	1	4		0	-0.257606	0.668303	0.159343	0.821075	-0.843413	1.39507
+	1.51865	1.27493	sp|Q8TD19|NEK9_HUMAN	NEK9	Serine/threonine-protein kinase Nek9			n[305]ELENAEFIPM[147]PDS[167]PSPLSAAFSESEK	Color2 [DarkGray]	1	4		6.53564e+06	0.0342913	1.07588	-0.739001	1.39647	0.557173	1.20491
+	2.27521	1.27487	sp|P51812|KS6A3_HUMAN	RPS6KA3	Ribosomal protein S6 kinase alpha-3			n[305]GFS[167]FVAITSDDESQAM[147]QTVGVHSIVQQLHR	Color2 [DarkGray]	1	4		19196978	-0.384581	0.852718	-0.224344	1.25633	0.214895	1.32152
+	2.39004	1.27424	sp|P26006|ITA3_HUMAN	ITGA3	Integrin alpha-3			n[305]S[167]QPSETERLTDDY	Color2 [DarkGray]	1	4		381723104	4.48601	5.6924	4.71107	5.59195	4.5094	6.24484
+	1.89342	1.27406	sp|Q07666|KHDR1_HUMAN	KHDRBS1	KH domain-containing, RNA-binding, signal transduction-associated protein 1			n[305]DDPAARMS[167]R	Color2 [DarkGray]	1	4		4671421	-0.549187	0.80937	-0.188244	0.574202	-0.214355	1.48681
+	2.5842	1.27385	sp|P60059|SC61G_HUMAN	SEC61G	Protein transport protein Sec61 subunit gamma			n[305]QFVKDS[167]IR	Color2 [DarkGray]	1	4		6.67405e+06	0.330027	1.7184	0.509014	1.30123	0.245949	1.88691
+	2.33329	1.27275	sp|Q8N6T3|ARFG1_HUMAN	ARFGAP1	ADP-ribosylation factor GTPase-activating protein 1			n[305]FGSQAS[167]QK	Color2 [DarkGray]	1	4		3.70832e+06	0.299794	2.02423	0.817082	1.54353	0.664336	2.03171
+	1.84417	1.27248	sp|Q13428|TCOF_HUMAN	TCOF1	Treacle protein			n[305]GS[167]LGSQGAK	Color2 [DarkGray]	1	4		38935392	2.88928	4.87665	3.07734	4.29256	3.27754	3.89239
+	3.26226	1.2721	sp|Q96AT1|K1143_HUMAN	KIAA1143	Uncharacterized protein KIAA1143			n[305]KKPNEDEVNQDS[167]VK	Color2 [DarkGray]	1	4		3.56798e+06	-1.20468	-0.134153	-1.3903	-0.141106	-1.29118	0.205391
+	1.80678	1.27167	sp|Q6NYC8|PPR18_HUMAN	PPP1R18	Phostensin			n[305]RS[167]GHTFTVNPR	Color2 [DarkGray]	1	4		16083951	0.491634	2.08325	0.723572	1.20544	0.367204	2.10873
+	3.25133	1.27158	sp|Q14152|EIF3A_HUMAN	EIF3A	Eukaryotic translation initiation factor 3 subunit A			n[305]DRES[167]LRR	Color2 [DarkGray]	1	4		591174208	3.04805	4.51474	3.10504	4.1692	3.23038	4.51427
+	1.28809	1.27013	sp|Q9NQ88|TIGAR_HUMAN	TIGAR	Fructose-2,6-bisphosphatase TIGAR			n[305]EQFS[167]QGSPSNCLETSLAEIFPLGK	Color2 [DarkGray]	1	4		1.62028e+06	-1.60642	-0.418375	-1.27719	-0.652102	-2.76382	-0.766578
+	1.44685	1.26918	sp|P08670|VIME_HUMAN	VIM	Vimentin			n[305]MFGGPGT[181]AS[167]RPSSSR	Color2 [DarkGray]	1	4		66088516	1.00188	2.44364	1.34911	2.07407	1.65406	3.29487
+	1.63694	1.26851	sp|P29084|T2EB_HUMAN	GTF2E2	Transcription initiation factor IIE subunit beta			n[305]RSASSESSSS[167]SSK	Color2 [DarkGray]	1	4		4.56241e+06	-1.37081	0.310427	-0.789384	-0.21834	-0.758598	0.794645
+	2.61937	1.26845	sp|P08581|MET_HUMAN	MET	Hepatocyte growth factor receptor			n[305]DLGS[167]ELVR	Color2 [DarkGray]	1	4		35406724	1.80067	3.03358	1.83907	2.71212	1.60348	3.30287
+	1.65382	1.26802	sp|O60716|CTND1_HUMAN	CTNND1	Catenin delta-1			n[305]Y[243]QEAAPNVANNTGPHAASCFGAK	Color2 [DarkGray]	1	4		3618629	0.377491	2.18172	1.2847	1.72299	0.947967	2.50951
+	2.17915	1.26743	sp|Q15084|PDIA6_HUMAN	PDIA6	Protein disulfide-isomerase A6			n[305]SGGYSS[167]GK	Color2 [DarkGray]	1	4		25372980	1.45327	2.72877	1.75539	2.42411	1.22797	3.08606
+	3.58199	1.26685	sp|Q5VTQ0|TT39B_HUMAN	TTC39B	Tetratricopeptide repeat protein 39B			n[305]GAS[167]TVSSSSSTK	Color2 [DarkGray]	1	4		3936460	-0.368444	1.02481	-0.47927	0.791353	-0.207045	0.929639
+	3.0873	1.26498	sp|O14924|RGS12_HUMAN	RGS12	Regulator of G-protein signaling 12		rev_sp|O60763|USO1_HUMAN	n[305]REES[167]IAK	Color2 [DarkGray]	1	4		4.84542e+06	0.294958	1.45105	0.306013	1.40987	0.311936	1.84692
+	1.99913	1.26461	sp|Q09666|AHNK_HUMAN	AHNAK	Neuroblast differentiation-associated protein AHNAK			n[305]GDIS[167]ISGPK	Color2 [DarkGray]	1	4		11308123	-1.28461	0.447073	-0.4779	0.425314	-0.503016	0.655911
+	1.36614	1.26362	sp|P16144|ITB4_HUMAN	ITGB4	Integrin beta-4			n[305]VTNNM[147]QRPGFATHAAS[167]INPTELVPYGLSLR	Color2 [DarkGray]	1	4		6.95091e+06	-2.7726	-0.651854	-1.40686	-0.993393	-1.77347	-0.516826
+	2.48964	1.2634	sp|P42684|ABL2_HUMAN	ABL2	Tyrosine-protein kinase ABL2			n[305]T[181]VSTSS[167]QPEENVDR	Color2 [DarkGray]	1	4		10339534	-2.07002	-0.280544	-1.82804	-0.696555	-1.57251	-0.703279
+	2.90529	1.26256	sp|Q9UBP0|SPAST_HUMAN	SPAST	Spastin			n[305]APS[167]YSGLSMVSGVK	Color2 [DarkGray]	1	4		23866830	-0.382624	1.03821	-0.16913	0.796819	-0.137247	1.26366
+	1.66827	1.26248	sp|Q969J2|ZKSC4_HUMAN	ZKSCAN4	Zinc finger protein with KRAB and SCAN domains 4			n[305]LT[181]PGSQGLLK	Color2 [DarkGray]	1	4		732551	-2.87367	-1.98181	-3.02161	-1.90182	-3.94486	-2.16908
+	2.56548	1.25873	sp|P53999|TCP4_HUMAN	SUB1	Activated RNA polymerase II transcriptional coactivator p15			n[305]ALSSSKQS[167]SSSRDDNM[147]FQIGK	Color2 [DarkGray]	1	4		7539764	-1.0766	0.149034	-0.767432	0.223097	-0.875307	0.684731
+	2.08378	1.25861	sp|Q9UJ41|RABX5_HUMAN	RABGEF1	Rab5 GDP/GTP exchange factor			n[305]APS[167]PSINRQT[181]SIETDRVSK	Color2 [DarkGray]	1	4		2087737	-1.86239	-0.445246	-1.49678	-0.835173	-1.7155	-0.0184126
+	2.53903	1.25763	sp|Q8IVF7|FMNL3_HUMAN	FMNL3	Formin-like protein 3			n[305]S[167]ARQSVLR	Color2 [DarkGray]	1	4		10913734	-0.191679	1.3475	0.427311	1.28832	0.158113	1.53083
+	3.12912	1.25637	sp|O00571|DDX3X_HUMAN	DDX3X	ATP-dependent RNA helicase DDX3X			n[305]GKS[167]SFFSDR	Color2 [DarkGray]	1	4		11660918	0.390308	1.57617	0.406118	1.44691	0.355915	1.89836
+	3.06445	1.25585	sp|Q9NZT2|OGFR_HUMAN	OGFR	Opioid growth factor receptor			n[305]AARPS[167]SFQSR	Color2 [DarkGray]	1	4		93882808	-0.564216	0.756846	-0.404616	0.616294	-0.376266	1.04932
+	2.58579	1.25559	sp|Q8N4X5|AF1L2_HUMAN	AFAP1L2	Actin filament-associated protein 1-like 2			n[305]NRPLS[167]VVVTGK	Color2 [DarkGray]	1	4		14567231	-1.431	0.0566425	-0.870835	0.145565	-0.961805	0.300912
+	4.97058	1.25556	sp|Q9NVP2|ASF1B_HUMAN	ASF1B	Histone chaperone ASF1B			n[305]GLGLPGCIPGLLPENS[167]M[147]DCI	Color2 [DarkGray]	1	4		38448744	0.327009	1.59914	0.355935	1.49773	0.274198	1.62695
+	1.42822	1.25322	sp|Q9P206|K1522_HUMAN	KIAA1522	Uncharacterized protein KIAA1522			n[305]ACSLAASEGLSSAQPNGPPEAEPRPPQS[167]PASTASFIFSK	Color2 [DarkGray]	1	4		4.04379e+06	-2.1587	-0.575603	-1.84668	-0.594326	-0.948138	-0.0239334
+	2.20446	1.25213	sp|Q9GZU8|PIP30_HUMAN	PSME3IP1	PSME3-interacting protein			n[305]SSESGNS[167]VK	Color2 [DarkGray]	1	4		11483162	-1.2209	-0.00671196	-1.30325	-0.517944	-1.53618	0.220724
+	1.75875	1.25209	sp|Q96PU5|NED4L_HUMAN	NEDD4L	E3 ubiquitin-protein ligase NEDD4-like			n[305]DFLLRPRS[167]HK	Color2 [DarkGray]	1	4		17086610	0.834229	1.97985	1.30872	1.98999	0.909204	2.83859
+	3.24891	1.25027	sp|Q8TDD1|DDX54_HUMAN	DDX54	ATP-dependent RNA helicase DDX54			n[305]YISSS[167]YKR	Color2 [DarkGray]	1	4		9560834	-0.772162	0.702653	-0.571944	0.369541	-0.636141	0.69838
+	2.32377	1.25	sp|Q96IF1|AJUBA_HUMAN	AJUBA	LIM domain-containing protein ajuba			n[305]GES[167]SRSGSDGTPGPGK	Color2 [DarkGray]	1	4		1.74011e+06	-1.11515	-0.205092	-1.00335	0.081357	-1.24076	0.514473
+	1.96928	1.24703	sp|Q5H9R7|PP6R3_HUMAN	PPP6R3	Serine/threonine-protein phosphatase 6 regulatory subunit 3			n[305]LS[167]TSQDAACK	Color2 [DarkGray]	1	4		61322628	1.72909	3.07454	1.56256	2.39862	1.73887	3.29847
+	3.12083	1.24607	sp|O94885|SASH1_HUMAN	SASH1	SAM and SH3 domain-containing protein 1			n[305]AVLLTAVELLQEYDSNSDQSGS[167]QEK	Color2 [DarkGray]	1	4		739897	-4.54271	-3.15304	-4.44071	-3.35256	-4.25228	-2.99188
+	2.33356	1.24542	sp|P39748|FEN1_HUMAN	FEN1	Flap endonuclease 1			n[305]VTGS[167]LSSAK	Color2 [DarkGray]	1	4		4489517	-0.21129	1.20919	0.103915	0.758443	-0.310435	1.35082
+	2.28177	1.24538	sp|P98179|RBM3_HUMAN	RBM3	RNA-binding protein 3			n[305]GGGDQGY[243]GSGRYYDSRPGGYGYGYGR	Color2 [DarkGray]	1	4		1881692	-2.60099	-1.41664	-2.27465	-1.43057	-2.52372	-0.816012
+	2.31907	1.24529	sp|Q6IN85|P4R3A_HUMAN	PPP4R3A	Serine/threonine-protein phosphatase 4 regulatory subunit 3A			n[305]LDSMRS[167]ILR	Color2 [DarkGray]	1	4		2.91341e+06	-0.950711	0.626778	-0.617791	0.0700617	-0.776133	0.694392
+	2.71022	1.24463	sp|Q9H063|MAF1_HUMAN	MAF1	Repressor of RNA polymerase III transcription MAF1 homolog			n[305]S[167]QGGEEEGPLSDK	Color2 [DarkGray]	1	4		10843696	0.53857	1.9751	1.02603	2.24896	0.919761	1.99418
+	3.0998	1.24437	sp|Q86UU1|PHLB1_HUMAN	PHLDB1	Pleckstrin homology-like domain family B member 1			n[305]T[181]FSDGLATR	Color2 [DarkGray]	1	4		21434008	0.468104	2.05485	0.698869	1.64798	0.628051	1.82529
+	2.48779	1.24436	sp|Q09666|AHNK_HUMAN	AHNAK	Neuroblast differentiation-associated protein AHNAK			n[305]MPEM[147]S[167]IK	Color2 [DarkGray]	1	4		7.04916e+06	0.104352	1.40671	0.300983	1.06848	0.0288591	1.6921
+	1.61427	1.24396	sp|Q96AP7|ESAM_HUMAN	ESAM	Endothelial cell-selective adhesion molecule			n[305]SSDT[181]ISK	Color2 [DarkGray]	1	4		10988835	0.587496	2.03666	1.45542	1.85058	0.716109	2.60368
+	1.98548	1.24391	sp|Q9NZQ7|PD1L1_HUMAN	CD274	Programmed cell death 1 ligand 1			n[305]CGIQDT[181]NSKK	Color2 [DarkGray]	1	4		6.12496e+06	0.30143	1.26298	0.278358	1.10331	-0.0159597	1.92926
+	1.25709	1.24361	sp|O76039|CDKL5_HUMAN	CDKL5	Cyclin-dependent kinase-like 5			n[305]S[167]QQNRHSFM[147]ESSQSK	Color2 [DarkGray]	1	4		325918	-2.82788	-2.4422	-4.29331	-2.68691	-3.86481	-2.12607
+	2.06889	1.24334	sp|Q9UPY5|XCT_HUMAN	SLC7A11	Cystine/glutamate transporter			n[305]KPVVS[167]TIS[167]K	Color2 [DarkGray]	1	4		3.3404e+06	0.18079	1.42648	0.617875	1.24307	-0.108142	1.75098
+	2.784	1.24285	sp|Q15527|SURF2_HUMAN	SURF2	Surfeit locus protein 2			n[305]QLGS[167]LKK	Color2 [DarkGray]	1	4		2.49599e+06	-0.908086	0.619665	-0.445724	0.477547	-0.520302	0.757225
+	2.7366	1.24153	sp|Q14011|CIRBP_HUMAN	CIRBP	Cold-inducible RNA-binding protein			n[305]SGGYGGS[167]RDYYSSR	Color2 [DarkGray]	1	4		13500831	0.36399	1.72557	0.41304	1.31437	0.416195	1.87787
+	1.87545	1.24146	sp|O14672|ADA10_HUMAN	ADAM10	Disintegrin and metalloproteinase domain-containing protein 10			n[305]QRPRES[167]YQMGHMR	Color2 [DarkGray]	1	4		26034568	-2.24146	-0.564929	-1.6886	-1.12153	-1.79272	-0.311942
+	2.72565	1.24144	sp|Q8N9T8|KRI1_HUMAN	KRI1	Protein KRI1 homolog			n[305]SIASS[167]VR	Color2 [DarkGray]	1	4		148841376	0.248121	1.72245	0.288569	1.15906	0.174408	1.55391
+	3.55585	1.24131	sp|Q8N1W1|ARG28_HUMAN	ARHGEF28	Rho guanine nucleotide exchange factor 28			n[305]TFS[167]FLMNR	Color2 [DarkGray]	1	4		48106308	2.11578	3.50474	2.21206	3.36455	2.39647	3.57894
+	2.2523	1.2408	sp|Q8ND56|LS14A_HUMAN	LSM14A	Protein LSM14 homolog A			n[305]T[181]QLS[167]QGRSSPQLDPLRK	Color2 [DarkGray]	1	4		358607008	4.76124	6.50211	4.89348	5.77857	5.0795	6.17595
+	2.63708	1.2403	sp|P0C0S5|H2AZ_HUMAN	H2AZ1	Histone H2A.Z	H2AZ2	sp|Q71UI9|H2AV_HUMAN	n[305]AVS[167]RSQR	Color2 [DarkGray]	1	4		2.46987e+06	-0.406586	0.606509	-0.426899	0.536703	-0.776086	0.968131
+	2.89905	1.23923	sp|Q9P206|K1522_HUMAN	KIAA1522	Uncharacterized protein KIAA1522			n[305]KGS[167]TFRPHDS[167]FPK	Color2 [DarkGray]	1	4		5304034	-0.404477	0.932729	0.00805902	1.0098	-0.134655	1.24408
+	2.12335	1.23876	sp|O75420|GGYF1_HUMAN	GIGYF1	GRB10-interacting GYF protein 1			n[305]S[167]ASPDGGPRS[167]AGWREHGER	Color2 [DarkGray]	1	4		6.86064e+06	-1.55382	0.0813828	-0.911758	-0.0293474	-0.860816	0.337842
+	2.20417	1.23556	sp|Q92574|TSC1_HUMAN	TSC1	Hamartin			n[305]DKEEAAISRELS[167]EITTAEAEPVVPR	Color2 [DarkGray]	1	4		5.96835e+06	0.186238	1.18859	0.386582	1.31074	-0.368408	1.41177
+	2.90389	1.23488	sp|Q9Y3A3|PHOCN_HUMAN	MOB4	MOB-like protein phocein			n[305]YFPSRVS[167]IK	Color2 [DarkGray]	1	4		13083188	0.449909	1.59632	0.270721	1.38767	0.43267	1.87396
+	1.66625	1.23453	sp|O60716|CTND1_HUMAN	CTNND1	Catenin delta-1			n[305]S[167]DKKPDREEIQM[147]SNMGSNTK	Color2 [DarkGray]	1	4		4444857	0.336906	1.40864	0.796927	1.32742	-0.168405	1.93297
+	2.45913	1.23444	sp|Q7Z5H3|RHG22_HUMAN	ARHGAP22	Rho GTPase-activating protein 22			n[305]SS[167]FRQPR	Color2 [DarkGray]	1	4		4.17643e+06	0.176984	1.50545	0.287565	1.12743	0.272041	1.80702
+	3.01061	1.23397	sp|Q99848|EBP2_HUMAN	EBNA1BP2	Probable rRNA-processing protein EBP2			n[305]ESYDDVSS[167]FRAK	Color2 [DarkGray]	1	4		62658812	-0.466076	0.873195	-0.240774	0.621639	-0.460336	1.0399
+	2.10597	1.23392	sp|Q96JP5|ZFP91_HUMAN	ZFP91	E3 ubiquitin-protein ligase ZFP91	ZNF653	sp|Q96CK0|ZN653_HUMAN	n[305]AS[167]LNWHMK	Color2 [DarkGray]	1	4		463144	-2.80894	-1.15579	-2.39637	-1.7671	-2.50126	-1.08193
+	2.99682	1.23336	sp|P07550|ADRB2_HUMAN	ADRB2	Beta-2 adrenergic receptor			n[305]AYGNGY[243]SSNGNTGEQS[167]GYHVEQEK	Color2 [DarkGray]	1	4		9846588	-0.553166	0.829556	-0.394063	0.534945	-0.397152	0.991189
+	2.02154	1.23302	sp|Q9NSV4|DIAP3_HUMAN	DIAPH3	Protein diaphanous homolog 3			n[305]FAS[167]IRIPGSK	Color2 [DarkGray]	1	4		7.49445e+06	-1.45692	0.0975723	-0.687435	-0.0871258	-1.14959	0.394664
+	2.19718	1.23237	sp|Q13541|4EBP1_HUMAN	EIF4EBP1	Eukaryotic translation initiation factor 4E-binding protein 1			n[305]RVVLGDGVQLPPGDY[243]STTPGGTLFSTTPGGTR	Color2 [DarkGray]	1	4		540942	-3.95503	-3.10606	-4.44389	-2.80698	-4.53818	-3.32695
+	1.88525	1.23221	sp|Q96AP7|ESAM_HUMAN	ESAM	Endothelial cell-selective adhesion molecule			n[305]NGTLSS[167]VTSAR	Color2 [DarkGray]	1	4		18533610	-0.140033	1.1452	0.396495	0.912949	-0.341146	1.55379
+	2.51294	1.23182	sp|A0AVK6|E2F8_HUMAN	E2F8	Transcription factor E2F8	ACTN3	sp|Q08043|ACTN3_HUMAN	n[305]AAS[167]VNSR	Color2 [DarkGray]	1	4		3.57078e+06	-0.597946	0.696106	-0.471104	0.283761	-0.865853	0.780696
+	3.23045	1.23014	sp|Q2M2I8|AAK1_HUMAN	AAK1	AP2-associated protein kinase 1			n[305]RILSDVT[181]HSAVFGVPASK	Color2 [DarkGray]	1	4		34458888	-1.16973	0.0973158	-0.823918	0.198141	-1.05751	0.343802
+	2.30752	1.22995	sp|Q12929|EPS8_HUMAN	EPS8	Epidermal growth factor receptor kinase substrate 8			n[305]GSHLDQGEAAVAFKPT[181]SNRHIDR	Color2 [DarkGray]	1	4		4836203	0.267299	1.25402	0.581206	1.54908	-0.00224495	1.733
+	2.64437	1.22914	sp|Q8IVF2|AHNK2_HUMAN	AHNAK2	Protein AHNAK2			n[305]VSFSS[167]TK	Color2 [DarkGray]	1	4		5981696	0.779791	2.14283	1.10458	1.85026	0.650084	2.22879
+	2.24043	1.2289	sp|Q6IN85|P4R3A_HUMAN	PPP4R3A	Serine/threonine-protein phosphatase 4 regulatory subunit 3A			n[305]LDS[167]MRSILR	Color2 [DarkGray]	1	4		4.02671e+06	-1.0005	0.370551	-0.914115	-0.216788	-1.11948	0.498855
+	2.66341	1.22702	sp|Q9C0C2|TB182_HUMAN	TNKS1BP1	182 kDa tankyrase-1-binding protein			n[305]DY[243]SSGGSSR	Color2 [DarkGray]	1	4		47735148	2.8245	4.45175	3.14531	3.96004	3.0664	4.30549
+	2.61227	1.22646	sp|P02686|MBP_HUMAN	MBP	Myelin basic protein			n[305]HRDTGILDS[167]IGR	Color2 [DarkGray]	1	4		3.7541e+06	-0.802683	0.196194	-0.917661	0.204828	-0.826836	0.731178
+	3.11422	1.22619	sp|Q7L014|DDX46_HUMAN	DDX46	Probable ATP-dependent RNA helicase DDX46			n[305]SSGFS[167]GK	Color2 [DarkGray]	1	4		36030368	1.92085	3.37283	2.08502	3.06996	2.17825	3.41991
+	2.32293	1.22499	sp|Q9UHD8|SEPT9_HUMAN	SEPTIN9	Septin-9			n[305]HVDSLS[167]QR	Color2 [DarkGray]	1	4		7.16146e+06	-0.451901	0.729369	-0.193287	0.544704	-0.605319	1.1504
+	2.49769	1.22479	sp|O75179|ANR17_HUMAN	ANKRD17	Ankyrin repeat domain-containing protein 17	ANKHD1	sp|Q8IWZ3|ANKH1_HUMAN	n[305]RLTS[167]SVSCALDEAAAALTR	Color2 [DarkGray]	1	4		21322530	-0.621453	0.973289	-0.678699	0.338007	-0.498544	0.564385
+	1.54592	1.224	sp|P04264|K2C1_HUMAN	KRT1	Keratin, type II cytoskeletal 1			n[305]GS[167]GGGSSGGSIGGR	Color2 [DarkGray]	1	4		1805271	-1.64569	-0.367488	-1.78112	-1.24377	-1.90612	-0.0496759
+	2.70019	1.22398	sp|Q969J2|ZKSC4_HUMAN	ZKSCAN4	Zinc finger protein with KRAB and SCAN domains 4			n[305]NRS[167]LIEHQK	Color2 [DarkGray]	1	4		10621454	-0.248026	1.12551	-0.408999	0.636136	-0.174935	1.07834
+	2.07749	1.22366	sp|O00213|APBB1_HUMAN	APBB1	Amyloid-beta A4 precursor protein-binding family B member 1			n[305]AAT[181]AHRDQNR	Color2 [DarkGray]	1	4		1.61594e+06	-2.93142	-1.4068	-2.31456	-1.73969	-2.6977	-1.12619
+	3.08933	1.22359	sp|Q96QB1|RHG07_HUMAN	DLC1	Rho GTPase-activating protein 7			n[305]ELS[167]SFSFSM[147]K	Color2 [DarkGray]	1	4		1.93344e+06	-2.57094	-1.37189	-2.73182	-1.48922	-2.39716	-1.16805
+	3.14102	1.22346	sp|Q96DR7|ARHGQ_HUMAN	ARHGEF26	Rho guanine nucleotide exchange factor 26			n[305]S[167]TWSQLSAVK	Color2 [DarkGray]	1	4		5.74338e+06	-2.41907	-0.918808	-2.17787	-1.15745	-2.41777	-1.26807
+	3.51528	1.22295	sp|O14974|MYPT1_HUMAN	PPP1R12A	Protein phosphatase 1 regulatory subunit 12A			n[305]LAS[167]TSDIEEK	Color2 [DarkGray]	1	4		21584880	-0.808605	0.622108	-0.450318	0.573121	-0.63319	0.581509
+	4.0245	1.22241	sp|Q684P5|RPGP2_HUMAN	RAP1GAP2	Rap1 GTPase-activating protein 2			n[305]ARCDS[167]TSSTPK	Color2 [DarkGray]	1	4		6119680	-0.568769	0.816231	-0.460941	0.57952	-0.491125	0.750644
+	2.40437	1.22202	sp|Q9BYW2|SETD2_HUMAN	SETD2	Histone-lysine N-methyltransferase SETD2			n[305]LQS[167]VVVVPK	Color2 [DarkGray]	1	4		2.39141e+06	-2.0204	-1.22936	-2.53934	-1.09372	-2.19851	-0.769105
+	3.377	1.22164	sp|Q14241|ELOA1_HUMAN	ELOA	Elongin-A			n[305]DREGSS[167]LKK	Color2 [DarkGray]	1	4		12940607	-0.236803	1.18031	0.00829077	0.918221	-0.157924	1.17997
+	2.13129	1.22136	sp|Q96PY6|NEK1_HUMAN	NEK1	Serine/threonine-protein kinase Nek1			n[305]S[167]VISVTSALK	Color2 [DarkGray]	1	4		2.24353e+06	-3.35057	-1.76796	-2.59342	-1.97744	-3.11594	-1.65045
+	3.47883	1.22125	sp|P49815|TSC2_HUMAN	TSC2	Tuberin			n[305]ARS[167]T[181]SLNERPK	Color2 [DarkGray]	1	4		5268443	-0.996328	0.112119	-0.885246	0.167884	-1.11975	0.382435
+	2.3124	1.221	sp|A4D2B0|MBLC1_HUMAN	MBLAC1	Metallo-beta-lactamase domain-containing protein 1			n[305]EAS[167]QPETEGGGNSQQEPVVGDEEPALH	Color2 [DarkGray]	1	4		3.72459e+06	-1.97563	-0.642673	-1.58371	-0.355368	-1.35185	-0.250141
+	3.96362	1.22097	sp|O15066|KIF3B_HUMAN	KIF3B	Kinesin-like protein KIF3B			n[305]RPLS[167]QHAR	Color2 [DarkGray]	1	4		3028460	-0.667912	0.676515	-0.725914	0.481436	-0.532985	0.578148
+	2.49149	1.22066	sp|Q9H4A6|GOLP3_HUMAN	GOLPH3	Golgi phosphoprotein 3			n[305]T[181]EASRNAADK	Color2 [DarkGray]	1	4		11793151	-0.855065	0.583869	-0.326001	0.489197	-0.931785	0.476074
+	2.75037	1.22029	sp|P27816|MAP4_HUMAN	MAP4	Microtubule-associated protein 4			n[305]S[167]TSTSSM[147]K	Color2 [DarkGray]	1	4		5.39377e+06	-0.520998	0.836754	-0.461511	0.902448	-0.00673675	0.932412
+	2.76542	1.21993	sp|P57737|CORO7_HUMAN	CORO7	Coronin-7			n[305]S[167]LQSLLGPSSK	Color2 [DarkGray]	1	4		7.40943e+06	-2.58208	-1.03235	-2.1566	-1.37881	-2.45302	-1.12074
+	2.67806	1.21975	sp|Q8WWI1|LMO7_HUMAN	LMO7	LIM domain only protein 7			n[305]RQAEIERET[181]SVR	Color2 [DarkGray]	1	4		184910960	0.589221	1.99109	0.877021	1.63227	0.617756	2.11989
+	2.43103	1.21973	sp|P78368|KC1G2_HUMAN	CSNK1G2	Casein kinase I isoform gamma-2			n[305]AGGGRS[167]SHGIR	Color2 [DarkGray]	1	4		22105950	-0.138553	1.02857	0.133906	0.904764	-0.29917	1.42203
+	2.31662	1.21831	sp|Q09666|AHNK_HUMAN	AHNAK	Neuroblast differentiation-associated protein AHNAK			n[305]VDIDT[181]PDINIEGSEGK	Color2 [DarkGray]	1	4		7.38166e+06	-2.15264	-0.489903	-1.52759	-0.824866	-2.02599	-0.736529
+	2.55052	1.21767	sp|P09651|ROA1_HUMAN	HNRNPA1	Heterogeneous nuclear ribonucleoprotein A1			n[305]NQGGY[243]GGSSSSSSYGSGR	Color2 [DarkGray]	1	4		48128760	1.87426	3.19425	1.8605	2.89476	2.15051	3.44926
+	1.66695	1.21748	sp|Q86U42|PABP2_HUMAN	PABPN1	Polyadenylate-binding protein 2			n[305]TTNYNS[167]SR	Color2 [DarkGray]	1	4		1.81755e+06	-1.48865	0.0823002	-1.38924	-0.868622	-1.39969	0.161189
+	1.59078	1.21674	sp|O43741|AAKB2_HUMAN	PRKAB2	5'-AMP-activated protein kinase subunit beta-2			n[305]AARS[167]EGAGGHAPGK	Color2 [DarkGray]	1	4		7.5655e+06	-1.12495	0.657994	-0.398395	0.233809	-0.238132	0.996929
+	1.80246	1.21621	sp|Q8WVK2|SNR27_HUMAN	SNRNP27	U4/U6.U5 small nuclear ribonucleoprotein 27 kDa protein			n[305]KVDGSVNAYAINVS[167]QK	Color2 [DarkGray]	1	4		42966488	0.292602	1.66801	0.620882	1.04642	0.00866127	1.85632
+	4.63385	1.21586	sp|Q14469|HES1_HUMAN	HES1	Transcription factor HES-1			n[305]NS[167]SSPVAATPASVNTTPDKPK	Color2 [DarkGray]	1	4		15365157	0.593365	1.91036	0.763906	1.84557	0.644798	1.89373
+	1.53672	1.21575	sp|Q3V6T2|GRDN_HUMAN	CCDC88A	Girdin			n[305]S[167]DS[167]SEGFLQLPHQDSQDSSSVGSNSLEDGQTLGTK	Color2 [DarkGray]	1	4		2.10893e+06	-2.27074	-0.931252	-2.8151	-1.0068	-1.56149	-1.06204
+	1.38499	1.21524	sp|Q92994|TF3B_HUMAN	BRF1	Transcription factor IIIB 90 kDa subunit			n[305]DGS[167]TEDTASSLCGEEDT[181]EDEELEAAASHLNK	Color2 [DarkGray]	1	4		0	-0.913395	-0.524926	-2.08704	-0.682199	-1.9723	-0.119896
+	1.49201	1.21506	sp|Q15291|RBBP5_HUMAN	RBBP5	Retinoblastoma-binding protein 5			n[305]VQAELS[167]QPLTAGGAISELL	Color2 [DarkGray]	1	4		5214911	-3.19467	-1.77013	-3.932	-2.08913	-2.99441	-2.61663
+	3.63298	1.21353	sp|P49006|MRP_HUMAN	MARCKSL1	MARCKS-related protein			n[305]LS[167]GLS[167]FK	Color2 [DarkGray]	1	4		29605530	-0.5083	0.824291	-0.318275	0.622354	-0.531797	0.835564
+	2.255	1.21256	sp|Q8NC26|ZN114_HUMAN	ZNF114	Zinc finger protein 114			n[305]Y[243]SLHLNK	Color2 [DarkGray]	1	4		1.00592e+06	-1.73025	-0.0835629	-1.7568	-0.788312	-1.73174	-0.709236
+	2.15334	1.21165	sp|Q96Q05|TPPC9_HUMAN	TRAPPC9	Trafficking protein particle complex subunit 9			n[305]SLLGQNVS[167]TK	Color2 [DarkGray]	1	4		22731928	-1.54308	-0.0675917	-1.03381	-0.43681	-1.35853	0.203946
+	2.13213	1.21117	sp|Q9HAT8|PELI2_HUMAN	PELI2	E3 ubiquitin-protein ligase pellino homolog 2			n[305]NQT[181]VVVEYTHDK	Color2 [DarkGray]	1	4		1.83422e+06	-1.71564	-0.874416	-1.93649	-0.984435	-2.16997	-0.329743
+	2.35486	1.21097	sp|Q9C0B5|ZDHC5_HUMAN	ZDHHC5	Palmitoyltransferase ZDHHC5			n[305]SAQGT[181]GFELGQLQSIRS[167]EGTTSTSYK	Color2 [DarkGray]	1	4		5.20112e+06	-1.11667	0.406498	-0.956494	-0.0909348	-0.755416	0.488772
+	3.15647	1.21067	sp|Q8N392|RHG18_HUMAN	ARHGAP18	Rho GTPase-activating protein 18			n[305]SKGDDATLPS[167]FRLPK	Color2 [DarkGray]	1	4		10950336	-0.305279	0.607518	-0.375461	0.939296	-0.388204	1.01625
+	2.06513	1.20976	sp|Q8TBN0|R3GEF_HUMAN	RAB3IL1	Guanine nucleotide exchange factor for Rab-3A			n[305]S[167]TSSTLCPAVCPAAGHTLTPDREGK	Color2 [DarkGray]	1	4		14553749	-0.584371	1.02967	0.186966	1.03914	0.0826931	1.24577
+	1.52593	1.20949	sp|Q13542|4EBP2_HUMAN	EIF4EBP2	Eukaryotic translation initiation factor 4E-binding protein 2			n[305]T[181]VAISDAAQLPHDYCTTPGGTLFS[167]TTPGGTRIIYDRK	Color2 [DarkGray]	1	4		3578893	-1.69984	-0.0365238	-0.734408	0.15809	-0.636636	0.436021
+	2.39352	1.20861	sp|P04049|RAF1_HUMAN	RAF1	RAF proto-oncogene serine/threonine-protein kinase			n[305]T[181]ISNGFGFK	Color2 [DarkGray]	1	4		2.0202e+06	-1.87828	-0.412532	-1.43912	-0.689558	-1.55995	-0.149429
+	2.60079	1.20783	sp|P26583|HMGB2_HUMAN	HMGB2	High mobility group protein B2			n[305]KGPGRPT[181]GSK	Color2 [DarkGray]	1	4		2.28367e+06	-1.18208	0.110237	-1.02158	-0.243304	-1.21763	0.335269
+	4.81038	1.20779	sp|O60343|TBCD4_HUMAN	TBC1D4	TBC1 domain family member 4			n[305]CSS[167]VTGVQR	Color2 [DarkGray]	1	4		141578048	2.70849	3.8467	2.70299	3.9596	2.76476	3.99332
+	2.19129	1.20721	sp|Q9UQ35|SRRM2_HUMAN	SRRM2	Serine/arginine repetitive matrix protein 2			n[305]SGTPPRQGSIT[181]S[167]PQANEQSVTPQR	Color2 [DarkGray]	1	4		13169096	1.44005	2.81479	1.81758	2.41341	1.42325	3.0743
+	2.7617	1.20687	sp|Q99439|CNN2_HUMAN	CNN2	Calponin-2			n[305]CAS[167]QSGM[147]TAYGTR	Color2 [DarkGray]	1	4		1.59474e+06	-2.59824	-1.47158	-2.27625	-1.3184	-2.58757	-1.05148
+	2.40493	1.20606	sp|Q8N9B5|JMY_HUMAN	JMY	Junction-mediating and -regulatory protein			n[305]S[167]TRSLLGDPR	Color2 [DarkGray]	1	4		3.76219e+06	-0.666807	0.657185	-0.461274	0.418173	-0.372079	1.04265
+	2.24234	1.20369	sp|Q15014|MO4L2_HUMAN	MORF4L2	Mortality factor 4-like protein 2			n[305]SAENPPS[167]GSVRK	Color2 [DarkGray]	1	4		346265344	0.734762	2.26521	1.32218	2.0498	1.17131	2.52431
+	2.99853	1.20315	sp|Q14980|NUMA1_HUMAN	NUMA1	Nuclear mitotic apparatus protein 1			n[305]LGNS[167]LLR	Color2 [DarkGray]	1	4		26483714	-0.110392	1.3656	-0.116578	0.893698	-0.023531	1.09964
+	3.03552	1.20239	sp|Q15056|IF4H_HUMAN	EIF4H	Eukaryotic translation initiation factor 4H			n[305]AYSSFGGGRGS[167]R	Color2 [DarkGray]	1	4		7603141	-0.283958	1.14356	-0.191263	0.704286	-0.367799	0.916301
+	2.42143	1.20238	sp|Q15056|IF4H_HUMAN	EIF4H	Eukaryotic translation initiation factor 4H			n[305]AY[243]SSFGGGR	Color2 [DarkGray]	1	4		44451864	0.169919	1.78091	0.626639	1.46071	0.674987	1.83706
+	1.30422	1.20152	sp|P46940|IQGA1_HUMAN	IQGAP1	Ras GTPase-activating-like protein IQGAP1			n[305]LAYLRS[167]HKDEVVK	Color2 [DarkGray]	1	4		4.65687e+06	-0.193429	1.2169	0.0557399	0.561721	0.287828	1.97608
+	3.32737	1.20118	sp|Q9NZQ7|PD1L1_HUMAN	CD274	Programmed cell death 1 ligand 1			n[305]CGIQDTNS[167]K	Color2 [DarkGray]	1	4		181160576	3.388	4.36878	3.28994	4.42758	3.22084	4.70596
+	2.39293	1.20023	sp|Q8NC26|ZN114_HUMAN	ZNF114	Zinc finger protein 114			n[305]AFREDGS[167]LR	Color2 [DarkGray]	1	4		2.75037e+06	-1.20964	0.393966	-0.753252	-0.0908518	-0.994187	0.340489
+	2.43127	1.19997	sp|Q9NQW6|ANLN_HUMAN	ANLN	Anillin			n[305]INS[167]SSVK	Color2 [DarkGray]	1	4		12961283	0.87866	2.4078	1.40633	2.16825	1.26783	2.57668
+	1.9802	1.19913	sp|Q16270|IBP7_HUMAN	IGFBP7	Insulin-like growth factor-binding protein 7			n[305]AAS[167]QRAESR	Color2 [DarkGray]	1	4		2.17858e+06	-1.15703	0.343308	-1.00218	-0.440084	-1.22741	0.307541
+	1.79266	1.199	sp|O00461|GOLI4_HUMAN	GOLIM4	Golgi integral membrane protein 4			n[305]QHS[167]DLEEEHRK	Color2 [DarkGray]	1	4		3.03438e+06	-1.9551	0.0451365	-1.11407	-0.476549	-1.28757	-0.328321
+	3.19359	1.19851	sp|Q9UKI2|BORG2_HUMAN	CDC42EP3	Cdc42 effector protein 3			n[305]QES[167]FGPAK	Color2 [DarkGray]	1	4		10033317	-0.00901508	1.30628	0.272249	1.30282	0.288211	1.53788
+	1.96565	1.19752	sp|Q9UKI2|BORG2_HUMAN	CDC42EP3	Cdc42 effector protein 3			n[305]NAISLPTIGGSQALM[147]LPLLS[167]PVTFNSK	Color2 [DarkGray]	1	4		4517399	-2.08961	-0.574359	-1.26123	-0.451895	-1.95833	-0.690372
+	3.45311	1.19707	sp|Q969E4|TCAL3_HUMAN	TCEAL3	Transcription elongation factor A protein-like 3			n[305]SEGEGKPQGEGKPAS[167]QAKPESQPR	Color2 [DarkGray]	1	4		3.42654e+06	-0.218074	1.17032	-0.0162759	1.2322	0.0941677	1.04852
+	2.02065	1.19657	sp|P07948|LYN_HUMAN	LYN	Tyrosine-protein kinase Lyn			n[305]TIYVRDPT[181]SNK	Color2 [DarkGray]	1	4		11374785	-0.0256729	1.61316	0.518342	1.37421	0.719426	1.81442
+	4.6396	1.19506	sp|Q96FK6|WDR89_HUMAN	WDR89	WD repeat-containing protein 89			n[305]VHSNDS[167]YKR	Color2 [DarkGray]	1	4		2.99511e+06	-0.128522	1.0209	-0.145504	1.00942	-0.292721	0.988103
+	2.57814	1.19489	sp|Q13442|HAP28_HUMAN	PDAP1	28 kDa heat- and acid-stable phosphoprotein			n[305]RMQSLS[167]LNK	Color2 [DarkGray]	1	4		15323646	1.08862	2.35313	1.35522	2.105	1.06617	2.63655
+	3.26276	1.19434	sp|Q9H6Z4|RANB3_HUMAN	RANBP3	Ran-binding protein 3			n[305]MPAPEPGAAPS[167]NEEDDS[167]DDDDVLAPSGATAAGAGDEGDGQTTGST	Color2 [DarkGray]	1	4		8678052	-0.577679	0.763711	-0.300464	0.667356	-0.333179	0.940644
+	2.30786	1.19329	sp|P10398|ARAF_HUMAN	ARAF	Serine/threonine-protein kinase A-Raf			n[305]NLGYRDS[167]GYYWEVPPSEVQLLK	Color2 [DarkGray]	1	4		12504279	-0.365974	0.419085	-0.290772	1.09183	-0.429805	0.982396
+	1.60966	1.1929	sp|O00139|KIF2A_HUMAN	KIF2A	Kinesin-like protein KIF2A			n[305]NRRT[181]VASIK	Color2 [DarkGray]	1	4		11482716	0.965367	2.46213	1.66462	2.24306	1.59463	3.09812
+	2.19978	1.19173	sp|Q8NFH8|REPS2_HUMAN	REPS2	RalBP1-associated Eps domain-containing protein 2			n[305]VPLSHGYS[167]K	Color2 [DarkGray]	1	4		6078675	-0.632919	0.777648	0.00452757	0.648382	-0.448491	1.07227
+	1.87224	1.1916	sp|Q96RL1|UIMC1_HUMAN	UIMC1	BRCA1-A complex subunit RAP80			n[305]DVETTSSVS[167]VK	Color2 [DarkGray]	1	4		15387479	-1.15046	0.548972	-0.845994	-0.154411	-0.621467	0.562305
+	3.9675	1.19145	sp|P17026|ZNF22_HUMAN	ZNF22	Zinc finger protein 22			n[305]FDSS[167]FSR	Color2 [DarkGray]	1	4		71693728	0.327506	1.68784	0.439215	1.45138	0.41742	1.61928
+	1.49087	1.19067	sp|Q8N2W9|PIAS4_HUMAN	PIAS4	E3 SUMO-protein ligase PIAS4			n[305]AGAVPRTPLAGPNIDY[243]PVLYGK	Color2 [DarkGray]	1	4		975107	-3.95051	-1.80932	-3.02465	-2.34881	-2.88136	-2.12638
+	2.54977	1.19026	sp|Q09666|AHNK_HUMAN	AHNAK	Neuroblast differentiation-associated protein AHNAK			n[305]FAGGLHFS[167]GPK	Color2 [DarkGray]	1	4		43469784	-0.625582	0.701714	-0.345937	0.349602	-0.7205	0.827451
+	2.24894	1.19003	sp|Q8NC26|ZN114_HUMAN	ZNF114	Zinc finger protein 114			n[305]YS[167]LHLNK	Color2 [DarkGray]	1	4		1.23706e+06	-1.90552	-0.135647	-1.66704	-0.703647	-1.45148	-0.614655
+	2.16014	1.18953	sp|Q96PY5|FMNL2_HUMAN	FMNL2	Formin-like protein 2			n[305]NS[167]RLVSK	Color2 [DarkGray]	1	4		9646576	-0.249574	1.11508	0.285973	0.93356	-0.0380602	1.51828
+	2.00776	1.18907	sp|P55210|CASP7_HUMAN	CASP7	Caspase-7			n[305]NVTM[147]RS[167]IK	Color2 [DarkGray]	1	4		8488428	0.498909	1.35464	0.633442	1.52779	0.334227	2.15135
+	2.43108	1.18624	sp|Q8TER5|ARH40_HUMAN	ARHGEF40	Rho guanine nucleotide exchange factor 40			n[305]VRT[181]VPTRK	Color2 [DarkGray]	1	4		3.28036e+06	0.198733	1.71861	0.552707	1.21818	0.339763	1.71314
+	2.95941	1.18556	sp|P46379|BAG6_HUMAN	BAG6	Large proline-rich protein BAG6			n[305]GPGAS[167]VHDR	Color2 [DarkGray]	1	4		12186669	-0.677041	0.699349	-0.755892	0.400074	-0.397941	0.626382
+	2.00522	1.18556	sp|O43719|HTSF1_HUMAN	HTATSF1	HIV Tat-specific factor 1			n[305]SDS[167]VSAS[167]ERAGPSR	Color2 [DarkGray]	1	4		5473055	-2.05958	-0.341346	-1.56748	-0.704674	-1.29384	-0.318214
+	2.98676	1.18402	sp|Q00587|BORG5_HUMAN	CDC42EP1	Cdc42 effector protein 1			n[305]LPRS[167]EKPHDRDR	Color2 [DarkGray]	1	4		4.18579e+06	-0.154329	1.08433	0.128049	1.04978	0.00959778	1.40127
+	1.78132	1.18398	sp|Q8WXE0|CSKI2_HUMAN	CASKIN2	Caskin-2			n[305]GHIHES[167]QRGTDR	Color2 [DarkGray]	1	4		1.82728e+06	-1.84276	-0.793269	-2.26401	-1.35163	-2.00564	-0.415582
+	2.66328	1.18355	sp|Q63HN8|RN213_HUMAN	RNF213	E3 ubiquitin-protein ligase RNF213			n[305]ASWTVQES[167]K	Color2 [DarkGray]	1	4		31356184	0.458897	1.89569	0.68705	1.64933	0.888729	2.04031
+	1.47917	1.18336	sp|O95490|AGRL2_HUMAN	ADGRL2	Adhesion G protein-coupled receptor L2			n[305]S[167]EGTDSYVSQLTAEAEDHLQSPNRDSLYTSMPNLR	Color2 [DarkGray]	1	4		0	-1.25264	-0.523356	-1.45202	-0.455484	-2.44217	-0.617898
+	1.89581	1.18334	sp|Q8WUF5|IASPP_HUMAN	PPP1R13L	RelA-associated inhibitor			n[305]RSDAGS[167]YRR	Color2 [DarkGray]	1	4		4850175	-0.815973	0.493877	-0.651212	-0.133721	-0.995501	0.727164
+	3.69583	1.18329	sp|Q70E73|RAPH1_HUMAN	RAPH1	Ras-associated and pleckstrin homology domains-containing protein 1			n[305]KPPPT[181]PQRNSS[167]IK	Color2 [DarkGray]	1	4		2868258	-1.93469	-0.712211	-1.69009	-0.545711	-1.74588	-0.562859
+	1.31145	1.18224	sp|P68363|TBA1B_HUMAN	TUBA1B	Tubulin alpha-1B chain	TUBA1A, TUBA3C, TUBA3D, TUBA3E, TUBA4A	sp|P0DPH7|TBA3C_HUMAN, sp|P0DPH8|TBA3D_HUMAN, sp|P68366|TBA4A_HUMAN, sp|Q6PEY2|TBA3E_HUMAN, sp|Q71U36|TBA1A_HUMAN	n[305]AYHEQLS[167]VAEITNACFEPANQM[147]VK	Color2 [DarkGray]	1	4		106914152	1.82945	3.14689	1.40618	1.93442	1.04868	2.74971
+	2.32096	1.18193	sp|Q9NQW6|ANLN_HUMAN	ANLN	Anillin			n[305]FS[167]SASGASAR	Color2 [DarkGray]	1	4		23940114	-0.492993	0.989752	-0.111187	0.517214	-0.345711	1.08893
+	1.4437	1.18164	sp|Q92890|UFD1_HUMAN	UFD1	Ubiquitin recognition factor in ER-associated degradation protein 1			n[305]KVEEDEAGGRFVAFSGEGQS[167]LR	Color2 [DarkGray]	1	4		18958360	1.79127	2.56059	1.96415	2.53987	1.35191	3.5518
+	2.80599	1.18137	sp|Q09666|AHNK_HUMAN	AHNAK	Neuroblast differentiation-associated protein AHNAK			n[305]ADIDVS[167]GPKVDIDTPDIDIHGPEGK	Color2 [DarkGray]	1	4		10435842	-0.445577	0.668401	-0.627242	0.329212	-0.696217	0.77745
+	3.37119	1.18114	sp|Q8WUJ0|STYX_HUMAN	STYX	Serine/threonine/tyrosine-interacting protein			n[305]S[167]LSVHSGTTGS[167]LK	Color2 [DarkGray]	1	4		8002884	0.0244331	1.31238	0.12083	1.24493	0.328595	1.45996
+	2.79917	1.17938	sp|O14757|CHK1_HUMAN	CHEK1	Serine/threonine-protein kinase Chk1			n[305]Y[243]SSSQPEPR	Color2 [DarkGray]	1	4		23803074	0.973597	2.33659	1.21843	2.05887	0.772968	2.10767
+	2.44787	1.17831	sp|Q5VTQ0|TT39B_HUMAN	TTC39B	Tetratricopeptide repeat protein 39B			n[305]QRGAS[167]TVSSSSSTK	Color2 [DarkGray]	1	4		9562552	-0.680648	0.857832	-0.0787606	0.619832	-0.492903	0.804954
+	2.00848	1.17816	sp|Q8WWI1|LMO7_HUMAN	LMO7	LIM domain only protein 7			n[305]SRQPS[167]YVPAPLRK	Color2 [DarkGray]	1	4		19110682	0.576876	1.9683	1.18346	1.87986	1.01031	2.45697
+	2.71438	1.17693	sp|Q99426|TBCB_HUMAN	TBCB	Tubulin-folding cofactor B			n[305]QDTVRS[167]FLK	Color2 [DarkGray]	1	4		21359728	0.111553	1.56718	0.362497	1.11561	0.211521	1.53357
+	2.13578	1.17656	sp|Q9H3Q1|BORG4_HUMAN	CDC42EP4	Cdc42 effector protein 4			n[305]DM[147]LGS[167]LRDSALFVK	Color2 [DarkGray]	1	4		4.94654e+06	-1.1833	0.0665112	-0.692131	-0.0686321	-1.15956	0.496801
+	2.72351	1.17576	sp|Q9UJF2|NGAP_HUMAN	RASAL2	Ras GTPase-activating protein nGAP			n[305]LDRNT[181]SFRLPSLR	Color2 [DarkGray]	1	4		14310984	-0.218596	0.947804	-0.159759	0.743424	-0.164742	1.29297
+	2.47239	1.17471	sp|Q08211|DHX9_HUMAN	DHX9	ATP-dependent RNA helicase A			n[305]YDNGS[167]GYR	Color2 [DarkGray]	1	4		298752576	1.00177	2.44216	1.37058	2.05302	0.864482	2.26578
+	2.30033	1.17431	sp|P35659|DEK_HUMAN	DEK	Protein DEK			n[305]LT[181]M[147]QVSSLQREPFTIAQGK	Color2 [DarkGray]	1	4		4304147	0.0432701	1.03948	-0.100759	0.781857	-0.177586	1.46652
+	2.74748	1.17413	sp|Q15596|NCOA2_HUMAN	NCOA2	Nuclear receptor coactivator 2			n[305]LERLDS[167]K	Color2 [DarkGray]	1	4		47702360	0.375783	1.97469	0.724564	1.56777	0.58975	1.67002
+	2.72754	1.17389	sp|P98175|RBM10_HUMAN	RBM10	RNA-binding protein 10	RBM5	sp|P52756|RBM5_HUMAN	n[305]EGS[167]GLGRK	Color2 [DarkGray]	1	4		7.01764e+06	0.737572	1.94494	0.847577	1.78303	0.918816	2.29766
+	2.23187	1.17315	sp|P22626|ROA2_HUMAN	HNRNPA2B1	Heterogeneous nuclear ribonucleoproteins A2/B1			n[305]S[167]GNFGGSRNMGGPYGGGNYGPGGSGGSGGYGGR	Color2 [DarkGray]	1	4		8644293	-0.920475	0.156766	-0.741589	-0.0102205	-1.05872	0.652134
+	2.68248	1.17315	sp|P06748|NPM_HUMAN	NPM1	Nucleophosmin			n[305]GQES[167]FKK	Color2 [DarkGray]	1	4		4707489792	1.65332	3.07761	1.94794	2.77273	1.95155	3.22191
+	4.08257	1.17301	sp|P62857|RS28_HUMAN	RPS28	40S ribosomal protein S28			n[305]T[181]GSQGQCTQVR	Color2 [DarkGray]	1	4		7.37782e+06	-0.851173	0.345727	-0.957849	0.158586	-0.856413	0.349272
+	3.37594	1.1729	sp|Q70E73|RAPH1_HUMAN	RAPH1	Ras-associated and pleckstrin homology domains-containing protein 1			n[305]S[167]SSGAEHPEPK	Color2 [DarkGray]	1	4		23688968	-0.538334	0.772154	-0.555475	0.777185	-0.264967	0.610571
+	2.28853	1.1723	sp|Q96CC6|RHDF1_HUMAN	RHBDF1	Inactive rhomboid protein 1			n[305]LT[181]NRTYRK	Color2 [DarkGray]	1	4		7491174	0.629387	1.91404	1.13323	1.77554	0.574203	2.16414
+	3.04608	1.1722	sp|Q9Y6G9|DC1L1_HUMAN	DYNC1LI1	Cytoplasmic dynein 1 light intermediate chain 1	CDK5R2, VSX1	sp|Q13319|CD5R2_HUMAN, sp|Q9NZR4|VSX1_HUMAN	n[305]VPGGS[167]PR	Color2 [DarkGray]	1	4		549979584	3.44974	4.58617	3.75472	4.77384	3.56434	4.92538
+	1.25817	1.17108	sp|Q07666|KHDR1_HUMAN	KHDRBS1	KH domain-containing, RNA-binding, signal transduction-associated protein 1	PIN1	sp|Q13526|PIN1_HUMAN	n[305]MSRSS[167]GR	Color2 [DarkGray]	1	4		3.85498e+06	-1.08052	-0.133777	-0.705718	-0.308989	-1.15886	1.0109
+	4.27071	1.16977	sp|Q6PKG0|LARP1_HUMAN	LARP1	La-related protein 1			n[305]RCPSQS[167]SSRPAAM[147]ISQPPTPPTGQPVREDAK	Color2 [DarkGray]	1	4		14792502	1.279	2.41162	1.16561	2.27459	1.11234	2.38007
+	2.56677	1.16957	sp|Q9UJM3|ERRFI_HUMAN	ERRFI1	ERBB receptor feedback inhibitor 1			n[305]KLTVNGVCAS[167]TPPLT[181]PIK	Color2 [DarkGray]	1	4		2.98824e+06	-1.72145	-0.284016	-1.44089	-0.380963	-1.15647	-0.145133
+	1.76546	1.16908	sp|Q7Z5R6|AB1IP_HUMAN	APBB1IP	Amyloid beta A4 precursor protein-binding family B member 1-interacting protein			n[305]RSSDTS[167]GS[167]PATPLK	Color2 [DarkGray]	1	4		40071672	0.820857	2.60261	1.54422	2.57128	1.81452	2.51295
+	1.91071	1.16781	sp|Q86SQ4|AGRG6_HUMAN	ADGRG6	Adhesion G-protein coupled receptor G6	DNAJC13	sp|O75165|DJC13_HUMAN	n[305]TAT[181]NIIK	Color2 [DarkGray]	1	4		8.09927e+06	0.496635	1.84402	1.13906	1.62019	0.527383	2.2023
+	2.16484	1.16772	sp|O60716|CTND1_HUMAN	CTNND1	Catenin delta-1			n[305]S[167]DKKPDREEIQMSNM[147]GSNTK	Color2 [DarkGray]	1	4		9639322	0.673588	1.77568	0.803818	1.58202	0.707604	2.33048
+	2.3385	1.16771	sp|Q9NV70|EXOC1_HUMAN	EXOC1	Exocyst complex component 1			n[305]LSVQSS[167]GNRR	Color2 [DarkGray]	1	4		160640848	1.40964	2.88281	1.80055	2.41122	1.31425	2.73353
+	3.19956	1.16757	sp|P49796|RGS3_HUMAN	RGS3	Regulator of G-protein signaling 3	PKDREJ	sp|Q9NTG1|PKDRE_HUMAN	n[305]VQNS[167]LRR	Color2 [DarkGray]	1	4		16762018	-1.13052	0.232561	-0.942302	-0.0455923	-0.95267	0.290246
+	1.39382	1.16628	sp|Q13043|STK4_HUMAN	STK4	Serine/threonine-protein kinase 4			n[305]RQES[167]QQREVDQDDEENS[167]EEDEMDSGTMVR	Color2 [DarkGray]	1	4		2.61237e+06	-2.25501	-0.977901	-2.36535	-0.788539	-1.20205	-0.557122
+	3.16599	1.16517	sp|Q5TAX3|TUT4_HUMAN	TUT4	Terminal uridylyltransferase 4			n[305]EIENSSPNRNS[167]SKK	Color2 [DarkGray]	1	4		2.44999e+06	-1.85382	-0.476165	-1.58453	-0.662539	-1.57851	-0.382631
+	2.07892	1.16502	sp|Q8WWI1|LMO7_HUMAN	LMO7	LIM domain only protein 7			n[305]STQMES[167]TRVSASLPR	Color2 [DarkGray]	1	4		3.12855e+06	-1.60844	-0.0698624	-1.21964	-0.593277	-1.24652	0.0835896
+	2.54434	1.16497	sp|Q9BUJ2|HNRL1_HUMAN	HNRNPUL1	Heterogeneous nuclear ribonucleoprotein U-like protein 1			n[305]DNNNS[167]NNRGSYNR	Color2 [DarkGray]	1	4		15349208	-1.89962	-0.678153	-2.30721	-1.07477	-1.89349	-0.852463
+	1.88682	1.16362	sp|P55042|RAD_HUMAN	RRAD	GTP-binding protein RAD			n[305]IVARNS[167]RK	Color2 [DarkGray]	1	4		3.77698e+06	-0.369246	0.875809	0.079947	0.819861	0.0366583	1.54255
+	4.06977	1.16329	sp|Q13541|4EBP1_HUMAN	EIF4EBP1	Eukaryotic translation initiation factor 4E-binding protein 1			n[305]FLM[147]ECRNS[167]PVTK	Color2 [DarkGray]	1	4		852048704	4.87754	6.15555	4.88444	6.13539	5.03755	5.99846
+	2.21224	1.16289	sp|Q8IVF2|AHNK2_HUMAN	AHNAK2	Protein AHNAK2			n[305]T[181]FSTQIVR	Color2 [DarkGray]	1	4		1.91775e+06	-1.0941	-0.0104494	-0.830559	-0.154246	-1.32599	0.40273
+	2.94716	1.16277	sp|P26651|TTP_HUMAN	ZFP36	mRNA decay activator protein ZFP36			n[305]STS[167]LVEGR	Color2 [DarkGray]	1	4		39800488	-0.141684	1.37012	0.00756788	0.965545	-0.0364971	0.982047
+	2.46033	1.16272	sp|P28749|RBL1_HUMAN	RBL1	Retinoblastoma-like protein 1			n[305]T[181]DSGSLRR	Color2 [DarkGray]	1	4		4.59147e+06	-0.122319	1.09703	0.0482259	0.824835	-0.0410986	1.45111
+	1.82041	1.1623	sp|P16070|CD44_HUMAN	CD44	CD44 antigen			n[305]LVINSGNGAVEDRKPS[167]GLNGEAS[167]K	Color2 [DarkGray]	1	4		4284917	-0.567516	0.747992	-0.00321436	0.4986	-0.386461	1.28311
+	3.8832	1.1619	sp|O00141|SGK1_HUMAN	SGK1	Serine/threonine-protein kinase Sgk1			n[305]HFDPEFTEEPVPNSIGKS[167]PDSVLVTASVK	Color2 [DarkGray]	1	4		2.40494e+06	-1.04906	-0.0142431	-1.25207	0.102966	-1.17691	-0.081069
+	2.17841	1.16176	sp|Q99759|M3K3_HUMAN	MAP3K3	Mitogen-activated protein kinase kinase kinase 3			n[305]RY[243]HVSVHHK	Color2 [DarkGray]	1	4		2977151	-1.00236	0.309144	-0.770669	-0.089592	-0.842364	0.650339
+	1.86702	1.16172	sp|Q8WXD5|GEMI6_HUMAN	GEMIN6	Gem-associated protein 6			n[305]VQDLIEGHLT[181]ASQ	Color2 [DarkGray]	1	4		780056	-3.89311	-3.29877	-4.12788	-2.77089	-4.66313	-3.1293
+	2.76258	1.16145	sp|Q9UG63|ABCF2_HUMAN	ABCF2	ATP-binding cassette sub-family F member 2			n[305]FGHGS[167]AK	Color2 [DarkGray]	1	4		30532832	2.7405	4.04987	2.87231	3.81496	3.03452	4.26684
+	1.84765	1.16028	sp|Q9Y450|HBS1L_HUMAN	HBS1L	HBS1-like protein			n[305]ALSGVLEQDRVQS[167]LK	Color2 [DarkGray]	1	4		15351019	-0.534158	1.11781	0.227355	1.33937	0.112648	0.8295
+	1.94582	1.159	sp|P02686|MBP_HUMAN	MBP	Myelin basic protein			n[305]AS[167]TNSETNRGESEKK	Color2 [DarkGray]	1	4		2.65023e+06	-1.26564	0.413832	-0.441721	0.174709	-1.0442	0.136881
+	2.35747	1.15875	sp|Q96MU7|YTDC1_HUMAN	YTHDC1	YTH domain-containing protein 1			n[305]IRLSS[167]SASREPYK	Color2 [DarkGray]	1	4		10009402	-1.62985	-0.197331	-1.03643	-0.248684	-1.20318	0.0527897
+	2.95034	1.15839	sp|Q6PJF5|RHDF2_HUMAN	RHBDF2	Inactive rhomboid protein 2			n[305]WQESS[167]EK	Color2 [DarkGray]	1	4		25307222	0.712477	2.1353	1.01101	1.79899	0.847971	2.11233
+	2.78607	1.15771	sp|Q8IUD2|RB6I2_HUMAN	ERC1	ELKS/Rab6-interacting/CAST family member 1			n[305]VEPSSQS[167]PGRS[167]PR	Color2 [DarkGray]	1	4		84162488	0.903617	1.68981	0.78359	2.17893	0.756836	2.04843
+	2.62606	1.15768	sp|Q9Y3B9|RRP15_HUMAN	RRP15	RRP15-like protein			n[305]EAGS[167]SMRK	Color2 [DarkGray]	1	4		6.44547e+06	-0.822582	0.384122	-0.93311	-0.0893087	-1.0866	0.335938
+	2.91095	1.15704	sp|Q9UHB6|LIMA1_HUMAN	LIMA1	LIM domain and actin-binding protein 1			n[305]SRPFTVAASFQS[167]TSVK	Color2 [DarkGray]	1	4		0	-0.935535	0.392242	-0.607782	0.161365	-0.873962	0.500247
+	1.73844	1.15689	sp|Q86SQ4|AGRG6_HUMAN	ADGRG6	Adhesion G-protein coupled receptor G6	DNAJC13	sp|O75165|DJC13_HUMAN	n[305]T[181]ATNIIK	Color2 [DarkGray]	1	4		6037460	0.262039	1.7583	0.91299	1.2391	0.318754	1.96706
+	2.73393	1.15679	sp|O00571|DDX3X_HUMAN	DDX3X	ATP-dependent RNA helicase DDX3X			n[305]QSSGAS[167]SSSFSSSR	Color2 [DarkGray]	1	4		44305396	-1.5949	-0.458986	-1.47718	-0.535866	-1.44257	-0.0494356
+	3.66796	1.15674	sp|Q5JTC6|AMER1_HUMAN	AMER1	APC membrane recruitment protein 1			n[305]GFFSS[167]IRR	Color2 [DarkGray]	1	4		9307657	-0.189937	1.0826	-0.0147929	0.93094	-0.0663805	1.18556
+	2.16579	1.15669	sp|P11171|EPB41_HUMAN	EPB41	Protein 4.1			n[305]HHAS[167]ISELK	Color2 [DarkGray]	1	4		19932696	1.36043	2.37413	1.21787	1.97986	0.889692	2.58408
+	1.6334	1.15629	sp|Q9NYL2|M3K20_HUMAN	MAP3K20	Mitogen-activated protein kinase kinase kinase 20			n[305]AVQLAIQTLFTNS[167]DGNPGSR	Color2 [DarkGray]	1	4		15057379	-2.01435	-1.25224	-2.05136	-1.20888	-2.13093	-0.26664
+	2.44852	1.15582	sp|Q9UIG0|BAZ1B_HUMAN	BAZ1B	Tyrosine-protein kinase BAZ1B			n[305]S[167]LSGSPLK	Color2 [DarkGray]	1	4		12474236	-0.519661	1.08573	-0.218792	0.882296	-0.221854	0.539115
+	1.20947	1.15476	sp|Q70E73|RAPH1_HUMAN	RAPH1	Ras-associated and pleckstrin homology domains-containing protein 1			n[305]RNDSTRLTQAEIS[167]EQPTMATVVPQVPTS[167]PK	Color2 [DarkGray]	1	4		8774987	-2.3232	-0.250225	-1.12417	-0.635132	-1.0096	-0.107336
+	2.1752	1.15382	sp|Q01082|SPTB2_HUMAN	SPTBN1	Spectrin beta chain, non-erythrocytic 1	PRSS23	sp|O95084|PRS23_HUMAN	n[305]RFS[167]LFGK	Color2 [DarkGray]	1	4		103144912	0.662671	2.09923	1.35202	2.01128	0.713108	2.07874
+	3.00448	1.1537	sp|Q8TF01|PNISR_HUMAN	PNISR	Arginine/serine-rich protein PNISR			n[305]ERPSS[167]FRDR	Color2 [DarkGray]	1	4		221450736	1.84604	3.27156	2.06946	3.04348	2.22013	3.28169
+	1.66294	1.15332	sp|P50548|ERF_HUMAN	ERF	ETS domain-containing transcription factor ERF			n[305]VRGEGPGEAGGPLT[181]PR	Color2 [DarkGray]	1	4		74300904	-0.217796	0.85381	0.312117	1.65927	0.43637	1.47756
+	2.50186	1.15247	sp|P18084|ITB5_HUMAN	ITGB5	Integrin beta-5			n[305]KPIS[167]T[181]HTVDFTFNK	Color2 [DarkGray]	1	4		1.10662e+06	-1.36895	-0.179442	-1.22065	-0.359594	-1.18333	0.223509
+	2.41718	1.15216	sp|Q96EY4|TMA16_HUMAN	TMA16	Translation machinery-associated protein 16			n[305]FS[167]SELEQIELHNSIRDR	Color2 [DarkGray]	1	4		10082282	-0.497325	1.04835	0.0554614	0.772967	-0.108092	1.0852
+	2.68833	1.15209	sp|Q16539|MK14_HUMAN	MAPK14	Mitogen-activated protein kinase 14			n[305]HTDDEM[147]TGY[243]VATR	Color2 [DarkGray]	1	4		59067020	-2.06597	-0.476027	-1.80013	-0.783925	-1.64129	-0.791175
+	2.56388	1.15122	sp|P27816|MAP4_HUMAN	MAP4	Microtubule-associated protein 4			n[305]STS[167]TSSM[147]K	Color2 [DarkGray]	1	4		5493875	-0.936138	0.111272	-0.67056	0.260421	-0.838959	0.636318
+	2.22685	1.15068	sp|Q9Y618|NCOR2_HUMAN	NCOR2	Nuclear receptor corepressor 2			n[305]VSGRPS[167]SRK	Color2 [DarkGray]	1	4		54452896	0.0706339	1.50687	0.522087	1.06501	0.022665	1.49555
+	2.56569	1.15056	sp|Q7Z6E9|RBBP6_HUMAN	RBBP6	E3 ubiquitin-protein ligase RBBP6			n[305]S[167]CYRSINR	Color2 [DarkGray]	1	4		6238804	-0.70904	0.446657	-0.558136	0.217202	-0.73479	0.785843
+	2.25796	1.15014	sp|Q9BYV8|CEP41_HUMAN	CEP41	Centrosomal protein of 41 kDa			n[305]LNQANSS[167]GR	Color2 [DarkGray]	1	4		11394814	-1.51836	0.1977	-1.07014	-0.148372	-0.913166	-0.100586
+	1.23196	1.14991	sp|P27816|MAP4_HUMAN	MAP4	Microtubule-associated protein 4			n[305]GIS[167]EDSHLESLQDVGQSAAPTFM[147]ISPETVTGTGK	Color2 [DarkGray]	1	4		3.40646e+06	-4.3498	-2.50911	-2.99237	-2.87331	-4.16932	-2.67934
+	3.32887	1.14948	sp|Q8IZP0|ABI1_HUMAN	ABI1	Abl interactor 1			n[305]LGS[167]QHSPGR	Color2 [DarkGray]	1	4		110261152	2.27493	3.48541	2.3236	3.20645	2.12763	3.48275
+	3.14549	1.14934	sp|Q2M2I8|AAK1_HUMAN	AAK1	AP2-associated protein kinase 1			n[305]ILSDVTHS[167]AVFGVPASK	Color2 [DarkGray]	1	4		0	1.2513	2.43566	1.4366	2.452	1.49084	2.73909
+	1.42397	1.14885	sp|Q96BY7|ATG2B_HUMAN	ATG2B	Autophagy-related protein 2 homolog B			n[305]LLQLS[167]GVSLFWDEFSASAK	Color2 [DarkGray]	1	4		179772	-4.05684	-3.15585	-5.08427	-3.19517	-3.88243	-3.22598
+	1.39542	1.14835	sp|Q14739|LBR_HUMAN	LBR	Delta(14)-sterol reductase LBR			n[305]GGSTSSSPS[167]RR	Color2 [DarkGray]	1	4		8.21773e+06	-0.586593	0.904182	0.134485	0.275553	-0.45866	1.35456
+	1.83701	1.14782	sp|O95297|MPZL1_HUMAN	MPZL1	Myelin protein zero-like protein 1			n[305]S[167]ESVVYADIRK	Color2 [DarkGray]	1	4		25311442	1.69238	3.09445	2.33363	3.08906	2.33778	3.62372
+	2.03348	1.14481	sp|Q9UPY5|XCT_HUMAN	SLC7A11	Cystine/glutamate transporter			n[305]KPVVS[167]TISK	Color2 [DarkGray]	1	4		5.49291e+06	0.345559	1.64307	0.545127	1.10022	0.300011	1.88185
+	3.48225	1.14391	sp|Q99590|SCAFB_HUMAN	SCAF11	Protein SCAF11			n[305]FVEQQS[167]YK	Color2 [DarkGray]	1	4		4.16722e+06	-0.800225	0.379784	-0.778508	0.251441	-0.660769	0.561017
+	1.9082	1.14379	sp|Q658P3|STEA3_HUMAN	STEAP3	Metalloreductase STEAP3			n[305]ESTIKFT[181]LPTDHALAEK	Color2 [DarkGray]	1	4		4302567	-0.362777	0.83193	-0.152697	0.354436	-0.559114	1.1704
+	2.3855	1.1426	sp|P08670|VIME_HUMAN	VIM	Vimentin			n[305]SVSSS[167]SYRR	Color2 [DarkGray]	1	4		108304920	-0.44943	1.0062	-0.233102	0.476688	-0.236873	1.02551
+	2.80362	1.14239	sp|Q9UPQ0|LIMC1_HUMAN	LIMCH1	LIM and calponin homology domains-containing protein 1			n[305]S[167]WST[181]ATSPLGGERPFR	Color2 [DarkGray]	1	4		9369327	-0.0679035	1.37689	0.13625	0.923242	-0.0834513	1.11193
+	1.32907	1.14221	sp|Q16665|HIF1A_HUMAN	HIF1A	Hypoxia-inducible factor 1-alpha			n[305]ILIASPS[167]PTHIHK	Color2 [DarkGray]	1	4		1.71097e+06	-2.7479	-1.20936	-1.75651	-1.48647	-3.05989	-1.44185
+	2.56372	1.14086	sp|O43143|DHX15_HUMAN	DHX15	Pre-mRNA-splicing factor ATP-dependent RNA helicase DHX15			n[305]LDLGEDYPS[167]GKK	Color2 [DarkGray]	1	4		3.70804e+06	-0.87948	0.188312	-0.84198	0.0536013	-0.834677	0.624519
+	2.05218	1.14058	sp|Q96MS0|ROBO3_HUMAN	ROBO3	Roundabout homolog 3			n[305]S[167]QSQRPGQK	Color2 [DarkGray]	1	4		2.55378e+06	-0.893284	0.4618	-0.818673	-0.105344	-0.684488	0.668826
+	3.65856	1.14045	sp|Q8IY63|AMOL1_HUMAN	AMOTL1	Angiomotin-like protein 1			n[305]QT[181]SLTSSQLAEEK	Color2 [DarkGray]	1	4		30661508	-1.52806	-0.202094	-1.4234	-0.397167	-1.30023	-0.23108
+	1.87576	1.13867	sp|Q6PJF5|RHDF2_HUMAN	RHBDF2	Inactive rhomboid protein 2			n[305]SRWQESS[167]EK	Color2 [DarkGray]	1	4		23200970	2.18678	3.22605	2.59924	3.20338	1.72994	3.50252
+	2.34828	1.13801	sp|P28482|MK01_HUMAN	MAPK1	Mitogen-activated protein kinase 1			n[305]VADPDHDHTGFLTEY[243]VATR	Color2 [DarkGray]	1	4		67792848	-0.379775	1.16279	-0.348045	0.828549	0.11827	0.813146
+	2.20853	1.13753	sp|O00571|DDX3X_HUMAN	DDX3X	ATP-dependent RNA helicase DDX3X			n[305]QS[167]SGAS[167]SSSFSSSR	Color2 [DarkGray]	1	4		2.01276e+06	-1.14005	0.424944	-0.715569	-0.0217161	-0.6818	0.47196
+	2.2642	1.1368	sp|P16591|FER_HUMAN	FER	Tyrosine-protein kinase Fer			n[305]FES[167]IRHSIAGIIR	Color2 [DarkGray]	1	4		14521654	-0.00878906	1.38513	0.401746	1.11124	0.363637	1.67061
+	1.86866	1.13668	sp|Q99959|PKP2_HUMAN	PKP2	Plakophilin-2			n[305]GT[181]AQYSSQKS[167]VEER	Color2 [DarkGray]	1	4		8898893	-0.157837	0.950188	0.0918126	0.867777	0.139778	1.66582
+	1.75183	1.13661	sp|Q6P4F7|RHGBA_HUMAN	ARHGAP11A	Rho GTPase-activating protein 11A			n[305]TPVRQS[167]VR	Color2 [DarkGray]	1	4		2.80189e+06	-0.39072	0.23962	-0.914555	0.0888977	-1.33958	0.436444
+	3.48688	1.13653	sp|O60292|SI1L3_HUMAN	SIPA1L3	Signal-induced proliferation-associated 1-like protein 3			n[305]AFHRLS[167]R	Color2 [DarkGray]	1	4		31503960	1.32653	2.61634	1.62865	2.51426	1.38394	2.6181
+	1.79208	1.13648	sp|Q9UHR6|ZNHI2_HUMAN	ZNHIT2	Zinc finger HIT domain-containing protein 2			n[305]LLS[167]RGEAGR	Color2 [DarkGray]	1	4		1.75795e+06	-1.83295	-0.112338	-1.41858	-0.96814	-1.83828	-0.599904
+	3.47334	1.13601	sp|O43491|E41L2_HUMAN	EPB41L2	Band 4.1-like protein 2			n[305]KNS[167]LRVEGDNIYVR	Color2 [DarkGray]	1	4		9943108	0.743077	1.9436	0.950365	1.8893	0.879522	2.14809
+	2.23664	1.13586	sp|Q14498|RBM39_HUMAN	RBM39	RNA-binding protein 39			n[305]IGLPHS[167]IKLSR	Color2 [DarkGray]	1	4		9282997	-0.493995	0.901531	-0.235901	0.421602	-0.278135	1.07642
+	1.88685	1.13584	sp|Q8IVF2|AHNK2_HUMAN	AHNAK2	Protein AHNAK2			n[305]IPSLGWSPS[167]K	Color2 [DarkGray]	1	4		6.76871e+06	-1.36417	0.0569534	-0.716541	-0.309064	-1.3437	0.23522
+	1.7652	1.13566	sp|Q8IU81|I2BP1_HUMAN	IRF2BP1	Interferon regulatory factor 2-binding protein 1			n[305]NGEAEVSPTAGAEAVS[167]GGGSGTGATPGAPLCCTLCR	Color2 [DarkGray]	1	4		11623406	-1.10045	0.0603409	NaN	0.500089	-0.647893	0.224022
+	2.56692	1.13526	sp|Q9H4A5|GLP3L_HUMAN	GOLPH3L	Golgi phosphoprotein 3-like			n[305]TEIS[167]KNSEK	Color2 [DarkGray]	1	4		9877638	0.799496	2.05819	1.10387	1.84027	0.93849	2.34917
+	3.00362	1.13499	sp|Q9H4L5|OSBL3_HUMAN	OSBPL3	Oxysterol-binding protein-related protein 3			n[305]NLGVS[167]QK	Color2 [DarkGray]	1	4		7295309	0.207463	1.62272	0.590823	1.40597	0.304326	1.47891
+	2.48236	1.13489	sp|Q8NCN4|RN169_HUMAN	RNF169	E3 ubiquitin-protein ligase RNF169			n[305]NLNRS[167]LQK	Color2 [DarkGray]	1	4		10405716	1.05012	2.25786	1.24137	1.94098	1.02207	2.51941
+	2.90153	1.13485	sp|Q96DR7|ARHGQ_HUMAN	ARHGEF26	Rho guanine nucleotide exchange factor 26			n[305]S[167]TWSQLS[167]AVK	Color2 [DarkGray]	1	4		8082490	-2.07069	-0.655952	-1.61191	-0.638474	-1.78541	-0.769036
+	1.51112	1.13434	sp|Q5VV42|CDKAL_HUMAN	CDKAL1	Threonylcarbamoyladenosine tRNA methylthiotransferase			n[305]NPAEDHFRNS[167]IK	Color2 [DarkGray]	1	4		6430143	-2.21776	-0.492488	-1.11403	-0.737977	-2.00755	-0.70584
+	3.24566	1.13402	sp|Q9NVD7|PARVA_HUMAN	PARVA	Alpha-parvin			n[305]KDDS[167]FLGK	Color2 [DarkGray]	1	4		33590180	0.830411	1.8237	0.884482	1.92513	0.83157	2.19968
+	1.30315	1.134	sp|P09874|PARP1_HUMAN	PARP1	Poly [ADP-ribose] polymerase 1			n[305]EEGINKS[167]EK	Color2 [DarkGray]	1	4		4904602	0.0274019	0.781738	0.208572	0.597483	-0.618464	1.64028
+	3.38117	1.13396	sp|Q9NYZ3|GTSE1_HUMAN	GTSE1	G2 and S phase-expressed protein 1			n[305]KS[167]SSGPVWSGASSACTSPAVGK	Color2 [DarkGray]	1	4		6854774	-1.75528	-0.655903	-1.94937	-0.914148	-1.93217	-0.664899
+	2.5962	1.1337	sp|Q9BYG5|PAR6B_HUMAN	PARD6B	Partitioning defective 6 homolog beta			n[305]NNVVRNS[167]R	Color2 [DarkGray]	1	4		7450159	-1.86181	-0.525912	-1.9705	-0.604207	-1.46971	-0.770807
+	2.73974	1.13368	sp|O15061|SYNEM_HUMAN	SYNM	Synemin			n[305]DADSRNDQAVGVS[167]FK	Color2 [DarkGray]	1	4		1.4111e+06	-1.34565	0.0746803	-0.922478	-0.120319	-1.01155	0.167001
+	2.97338	1.13192	sp|O15534|PER1_HUMAN	PER1	Period circadian protein homolog 1			n[305]GCHHGPAPPS[167]RR	Color2 [DarkGray]	1	4		3.70201e+06	-2.62175	-1.26454	-2.48134	-1.52349	-2.298	-1.21728
+	1.70999	1.13145	sp|P82979|SARNP_HUMAN	SARNP	SAP domain-containing ribonucleoprotein			n[305]FGLNVS[167]SISRKSEDDEK	Color2 [DarkGray]	1	4		652427	-2.00086	-0.973799	-1.93497	-1.43699	-2.39619	-0.526886
+	1.70168	1.13138	sp|Q5VT25|MRCKA_HUMAN	CDC42BPA	Serine/threonine-protein kinase MRCK alpha			n[305]TVFSGSVSIPS[167]ITK	Color2 [DarkGray]	1	4		2.46596e+06	-2.80907	-1.42048	-1.91104	-1.44507	-2.55514	-1.01557
+	2.62325	1.13131	sp|P09132|SRP19_HUMAN	SRP19	Signal recognition particle 19 kDa protein			n[305]T[181]GGADQSLQQGEGSK	Color2 [DarkGray]	1	4		3136789	-0.614113	0.734843	-0.454438	0.318098	-0.447897	0.824546
+	3.66854	1.13128	sp|Q9H6S3|ES8L2_HUMAN	EPS8L2	Epidermal growth factor receptor kinase substrate 8-like protein 2			n[305]QSIRNS[167]QK	Color2 [DarkGray]	1	4		655562496	1.32549	2.50587	1.55641	2.50765	1.41687	2.67908
+	2.16893	1.12972	sp|P43354|NR4A2_HUMAN	NR4A2	Nuclear receptor subfamily 4 group A member 2	NR4A1, NR4A3	sp|P22736|NR4A1_HUMAN, sp|Q92570|NR4A3_HUMAN	n[305]GRLPS[167]KPK	Color2 [DarkGray]	1	4		4858944	-0.118488	1.49864	0.518607	1.09868	0.2059	1.39787
+	3.78887	1.12962	sp|Q6VY07|PACS1_HUMAN	PACS1	Phosphofurin acidic cluster sorting protein 1			n[305]LT[181]STSAITR	Color2 [DarkGray]	1	4		17203232	1.22765	2.39077	1.30301	2.22316	1.11496	2.42054
+	1.86249	1.12889	sp|O43143|DHX15_HUMAN	DHX15	Pre-mRNA-splicing factor ATP-dependent RNA helicase DHX15			n[305]LDLGEDYPS[167]GK	Color2 [DarkGray]	1	4		4806354	-0.870874	0.257723	-0.778596	-0.102427	-0.766694	0.815198
+	2.36977	1.12883	sp|Q09666|AHNK_HUMAN	AHNAK	Neuroblast differentiation-associated protein AHNAK			n[305]SPSLDVT[181]VPEAELNLETPEISVGGK	Color2 [DarkGray]	1	4		67104144	0.108109	1.33602	-0.096148	1.00236	0.385715	1.44578
+	2.11213	1.12836	sp|Q14671|PUM1_HUMAN	PUM1	Pumilio homolog 1			n[305]QHGEQLGGGGSGGGGYNNS[167]K	Color2 [DarkGray]	1	4		8882418	-1.57636	-0.260776	-1.31423	-0.685087	-1.38748	0.0528975
+	2.85153	1.12787	sp|Q96GA3|LTV1_HUMAN	LTV1	Protein LTV1 homolog			n[305]AVS[167]FHLVHR	Color2 [DarkGray]	1	4		60243612	0.691175	2.1413	1.07892	1.86619	0.957452	2.10366
+	3.58525	1.12778	sp|O43516|WIPF1_HUMAN	WIPF1	WAS/WASL-interacting protein family member 1			n[305]ALDDKPPPPPPPVGNRPS[167]IHR	Color2 [DarkGray]	1	4		14504475	1.30399	2.44163	1.38176	2.54772	1.55419	2.63392
+	1.62028	1.12755	sp|Q7Z699|SPRE1_HUMAN	SPRED1	Sprouty-related, EVH1 domain-containing protein 1			n[305]LS[167]SPKDSVVFK	Color2 [DarkGray]	1	4		4251907	-0.0744057	1.40357	0.68349	1.08676	0.37685	1.87826
+	2.92121	1.12708	sp|Q14152|EIF3A_HUMAN	EIF3A	Eukaryotic translation initiation factor 3 subunit A			n[305]RLGDS[167]SLSR	Color2 [DarkGray]	1	4		5500761	-0.669942	0.697482	-0.32626	0.476446	-0.696023	0.515079
+	2.63423	1.12595	sp|Q92597|NDRG1_HUMAN	NDRG1	Protein NDRG1			n[305]SHTSEGT[181]RSR	Color2 [DarkGray]	1	4		1.11236e+06	-2.75967	-1.49658	-2.34227	-1.45507	-2.40749	-1.17993
+	1.6694	1.1255	sp|Q5VZ89|DEN4C_HUMAN	DENND4C	DENN domain-containing protein 4C			n[305]RS[167]S[167]LPLDHGSPAQENPESEK	Color2 [DarkGray]	1	4		7299125	-0.25915	1.25001	0.29548	0.642149	0.00760078	1.52828
+	2.2261	1.12532	sp|Q9ULD4|BRPF3_HUMAN	BRPF3	Bromodomain and PHD finger-containing protein 3			n[305]LLS[167]DNGINR	Color2 [DarkGray]	1	4		29871258	1.11393	2.60148	0.997389	1.92628	1.27293	2.23245
+	2.97051	1.12409	sp|P46013|KI67_HUMAN	MKI67	Proliferation marker protein Ki-67			n[305]TRS[167]HRDSEDI	Color2 [DarkGray]	1	4		6086913	-1.31013	-0.0538988	-1.41463	-0.419285	-1.20077	-0.0800695
+	2.85586	1.12389	sp|P51991|ROA3_HUMAN	HNRNPA3	Heterogeneous nuclear ribonucleoprotein A3			n[305]SSGSPYGGGYGSGGGS[167]GGYGSRRF	Color2 [DarkGray]	1	4		14145914	1.45715	2.4008	1.265	2.30626	1.35148	2.73825
+	3.17359	1.12384	sp|Q9Y618|NCOR2_HUMAN	NCOR2	Nuclear receptor corepressor 2			n[305]GVS[167]GVDLYR	Color2 [DarkGray]	1	4		23898532	1.08216	2.07601	1.19361	2.13317	0.873373	2.3115
+	2.72668	1.12345	sp|Q13247|SRSF6_HUMAN	SRSF6	Serine/arginine-rich splicing factor 6			n[305]SGGGGYS[167]SRR	Color2 [DarkGray]	1	4		11680757	0.473709	1.79302	0.610981	1.3668	0.535641	1.83086
+	2.79643	1.12282	sp|P17612|KAPCA_HUMAN	PRKACA	cAMP-dependent protein kinase catalytic subunit alpha			n[305]KGSEQES[167]VK	Color2 [DarkGray]	1	4		11422787	0.146607	1.45076	0.351084	1.14132	0.318268	1.59233
+	2.12238	1.12249	sp|O00571|DDX3X_HUMAN	DDX3X	ATP-dependent RNA helicase DDX3X			n[305]QSSGASSSSFS[167]SSRASS[167]SR	Color2 [DarkGray]	1	4		3.27164e+06	-0.922212	0.286242	-0.865797	-0.244184	-1.04968	0.48772
+	1.97582	1.12218	sp|Q9UPN6|SCAF8_HUMAN	SCAF8	SR-related and CTD-associated factor 8			n[305]FRS[167]GNYR	Color2 [DarkGray]	1	4		2.68948e+06	-0.289387	0.719808	-0.303889	0.408865	-0.394807	1.24979
+	1.87927	1.12208	sp|P35249|RFC4_HUMAN	RFC4	Replication factor C subunit 4			n[305]GTS[167]ISTKPPLTK	Color2 [DarkGray]	1	4		11806702	1.19787	2.65984	1.83301	2.50125	1.8125	3.04852
+	2.10672	1.12136	sp|O14795|UN13B_HUMAN	UNC13B	Protein unc-13 homolog B			n[305]KPLPLVSDLSLVQS[167]RK	Color2 [DarkGray]	1	4		2264921	-0.700281	0.428883	-0.553851	0.0553455	-0.836514	0.789194
+	2.37972	1.12134	sp|O60503|ADCY9_HUMAN	ADCY9	Adenylate cyclase type 9			n[305]AS[167]SRWWDPK	Color2 [DarkGray]	1	4		2.81729e+06	-1.51186	-0.693879	-1.39608	-0.467834	-1.85148	-0.23368
+	2.6409	1.12048	sp|Q9NWQ8|PHAG1_HUMAN	PAG1	Phosphoprotein associated with glycosphingolipid-enriched microdomains 1			n[305]RFS[167]SLSYK	Color2 [DarkGray]	1	4		39046536	0.241037	1.32747	0.596695	1.40771	0.120172	1.58417
+	3.1535	1.1201	sp|P36957|ODO2_HUMAN	DLST	Dihydrolipoyllysine-residue succinyltransferase component of 2-oxoglutarate dehydrogenase complex, mitochondrial			n[305]S[167]LSAFQK	Color2 [DarkGray]	1	4		722821	-2.64643	-1.3058	-2.29496	-1.35811	-2.31933	-1.23652
+	2.25421	1.11935	sp|Q9C0C2|TB182_HUMAN	TNKS1BP1	182 kDa tankyrase-1-binding protein			n[305]TY[243]GTTTAPRDEDGSTLFRGWSQEGPVK	Color2 [DarkGray]	1	4		19052504	2.34392	3.78579	2.64164	3.23837	2.49396	3.81342
+	2.55706	1.11907	sp|Q66PJ3|AR6P4_HUMAN	ARL6IP4	ADP-ribosylation factor-like protein 6-interacting protein 4			n[305]EEWDARQS[167]IIRK	Color2 [DarkGray]	1	4		11318244	1.7771	2.89573	1.92439	2.65744	1.69133	3.19685
+	2.11296	1.11902	sp|Q9C0B5|ZDHC5_HUMAN	ZDHHC5	Palmitoyltransferase ZDHHC5			n[305]S[167]AQGTGFELGQLQS[167]IRSEGTTSTSYK	Color2 [DarkGray]	1	4		1.138e+06	-2.23003	-1.04487	-1.8132	-1.01505	-1.85611	-0.482377
+	2.90331	1.11875	sp|Q9H4B6|SAV1_HUMAN	SAV1	Protein salvador homolog 1			n[305]NLMPS[167]FIR	Color2 [DarkGray]	1	4		1.98448e+06	-1.62862	-0.533664	-1.9049	-0.629718	-1.45899	-0.472885
+	2.67722	1.11842	sp|P20585|MSH3_HUMAN	MSH3	DNA mismatch repair protein Msh3			n[305]FFQSTGS[167]LK	Color2 [DarkGray]	1	4		24088308	-1.17053	0.0589933	-0.976071	-0.190608	-1.02262	0.317663
+	2.94397	1.11716	sp|P10412|H14_HUMAN	H1-4	Histone H1.4	H1-1, H1-2, H1-3, H1-5, H1-6	sp|P16401|H15_HUMAN, sp|P16402|H13_HUMAN, sp|P16403|H12_HUMAN, sp|P22492|H1T_HUMAN, sp|Q02539|H11_HUMAN	n[305]GT[181]GASGSFK	Color2 [DarkGray]	1	4		1407044992	2.4065	3.64336	2.83297	3.68616	2.49047	3.75191
+	2.78937	1.11682	sp|Q8N567|ZCHC9_HUMAN	ZCCHC9	Zinc finger CCHC domain-containing protein 9			n[305]QLEANRLS[167]LK	Color2 [DarkGray]	1	4		17450536	-0.079298	1.3447	0.392388	1.19163	0.222229	1.34944
+	2.04539	1.11639	sp|Q9UJF2|NGAP_HUMAN	RASAL2	Ras GTPase-activating protein nGAP			n[305]S[167]PSQDNTDSYFR	Color2 [DarkGray]	1	4		10174014	0.822954	1.86033	0.742452	1.56569	0.872702	2.36127
+	2.15794	1.11617	sp|O14950|ML12B_HUMAN	MYL12B	Myosin regulatory light chain 12B	MYL12A, MYL9	sp|P19105|ML12A_HUMAN, sp|P24844|MYL9_HUMAN	n[305]KRPQRAT[181]SNVFAMFDQSQIQEFK	Color2 [DarkGray]	1	4		3.39528e+06	0.149803	1.04319	0.171225	0.918503	-0.173339	1.5345
+	1.20566	1.11553	sp|P02663|CASA2_BOVIN	CSN1S2	Alpha-S2-casein			n[305]T[181]VDM[147]ESTEVFTK	Color2 [DarkGray]	1	4		1.87144e+06	-1.56246	-1.22962	-1.49409	0.263039	-1.68299	-0.426352
+	2.69626	1.11551	sp|Q14315|FLNC_HUMAN	FLNC	Filamin-C			n[305]LGSFGS[167]ITR	Color2 [DarkGray]	1	4		81800848	0.639079	1.9978	0.864958	1.56028	0.644778	1.93729
+	2.16824	1.11488	sp|Q6FI81|CPIN1_HUMAN	CIAPIN1	Anamorsin			n[305]QLKLS[167]ITK	Color2 [DarkGray]	1	4		9285662	-0.401346	0.695439	-0.261479	0.366522	-0.567608	1.05225
+	3.64692	1.11475	sp|O96013|PAK4_HUMAN	PAK4	Serine/threonine-protein kinase PAK 4			n[305]T[181]IVRGSK	Color2 [DarkGray]	1	4		12442918	1.51557	2.70533	1.61178	2.59746	1.68286	2.85167
+	2.78245	1.11428	sp|Q09666|AHNK_HUMAN	AHNAK	Neuroblast differentiation-associated protein AHNAK			n[305]ADIDVSGPKVDIDT[181]PDIDIHGPEGK	Color2 [DarkGray]	1	4		3.51364e+06	-0.805988	0.137461	-0.874822	0.0288897	-1.02626	0.469419
+	3.2214	1.11419	sp|Q8WYP5|ELYS_HUMAN	AHCTF1	Protein ELYS			n[305]LLATAS[167]FTK	Color2 [DarkGray]	1	4		5.32859e+06	-1.47208	-0.255317	-1.36697	-0.547505	-1.59345	-0.287113
+	2.3409	1.11364	sp|Q6UWI4|SHSA2_HUMAN	SHISA2	Protein shisa-2 homolog			n[305]QS[167]STAASSSSSANSGAR	Color2 [DarkGray]	1	4		3800132	-3.2814	-1.99008	-3.38204	-2.25642	-2.84495	-1.92097
+	1.86989	1.1121	sp|Q7Z2W4|ZCCHV_HUMAN	ZC3HAV1	Zinc finger CCCH-type antiviral protein 1			n[305]SGTQDIQPGPLFNNNADGVATDITSTRS[167]LNYK	Color2 [DarkGray]	1	4		2055023	-0.85612	0.586679	-0.408719	0.156234	-0.41815	0.910406
+	5.02806	1.11192	sp|Q9UBT2|SAE2_HUMAN	UBA2	SUMO-activating enzyme subunit 2			n[305]SITNGSDDGAQPSTST[181]AQEQDDVLIVDSDEEDS[167]SNNADVSEEER	Color2 [DarkGray]	1	4		2.38982e+06	-2.68258	-1.66994	-2.7768	-1.63772	-2.76534	-1.58131
+	2.52881	1.11179	sp|P35659|DEK_HUMAN	DEK	Protein DEK			n[305]LTMQVSSLQREPFT[181]IAQGK	Color2 [DarkGray]	1	4		6745542	-1.48325	-0.178982	-1.08903	-0.307993	-1.14887	0.101197
+	1.90167	1.11094	sp|P21399|ACOC_HUMAN	ACO1	Cytoplasmic aconitate hydratase			n[305]RADS[167]LQK	Color2 [DarkGray]	1	4		111287800	-0.834747	0.699471	-0.175388	0.360485	-0.33638	0.926351
+	2.5267	1.10978	sp|P18084|ITB5_HUMAN	ITGB5	Integrin beta-5			n[305]KPIS[167]THTVDFTFNK	Color2 [DarkGray]	1	4		14896828	1.41915	2.75412	1.61783	2.5043	1.82812	2.93604
+	3.53562	1.10977	sp|Q9UJM3|ERRFI_HUMAN	ERRFI1	ERBB receptor feedback inhibitor 1			n[305]KLTVNGVCASTPPLT[181]PIK	Color2 [DarkGray]	1	4		24711664	-0.387938	0.653017	-0.318012	0.618625	-0.468648	0.883078
+	2.60622	1.10898	sp|O43520|AT8B1_HUMAN	ATP8B1	Phospholipid-transporting ATPase IC			n[305]GYADLISS[167]GRS[167]IR	Color2 [DarkGray]	1	4		1.90288e+06	-2.26717	-1.27003	-2.14213	-1.35992	-2.59226	-1.04467
+	2.15387	1.1085	sp|Q9UHD8|SEPT9_HUMAN	SEPTIN9	Septin-9			n[305]HVDS[167]LSQR	Color2 [DarkGray]	1	4		6737668	-0.392617	0.702591	-0.682917	0.189697	-0.50556	0.852108
+	2.16008	1.108	sp|Q99959|PKP2_HUMAN	PKP2	Plakophilin-2			n[305]EAGPSVAVDSS[167]GRR	Color2 [DarkGray]	1	4		14920965	-0.407063	0.960817	0.0416465	0.905142	0.195533	1.28816
+	2.11432	1.10753	sp|Q8WW12|PCNP_HUMAN	PCNP	PEST proteolytic signal-containing nuclear protein			n[305]FGFAIGSQTT[181]K	Color2 [DarkGray]	1	4		1.75877e+06	-1.86108	-0.60538	-1.50128	-0.984716	-1.9073	-0.356966
+	1.82264	1.10581	sp|P48730|KC1D_HUMAN	CSNK1D	Casein kinase I isoform delta			n[305]GLPSTAS[167]GRLR	Color2 [DarkGray]	1	4		12700161	0.396632	1.57768	0.696074	1.25787	0.561195	2.13577
+	2.90392	1.10561	sp|Q7L4I2|RSRC2_HUMAN	RSRC2	Arginine/serine-rich coiled-coil protein 2			n[305]EQSEVSVSPRAS[167]K	Color2 [DarkGray]	1	4		1.92063e+06	-1.59918	-0.575923	-1.51653	-0.693417	-1.85785	-0.387397
+	2.77918	1.10548	sp|O00461|GOLI4_HUMAN	GOLIM4	Golgi integral membrane protein 4			n[305]KQHS[167]DLEEEHRK	Color2 [DarkGray]	1	4		2.8752e+06	-0.429049	0.728117	-0.18305	0.544906	-0.50683	0.924488
+	1.67561	1.10521	sp|Q9NQW6|ANLN_HUMAN	ANLN	Anillin			n[305]RLLT[181]SITTK	Color2 [DarkGray]	1	4		5.6376e+06	-0.53493	0.824816	0.181391	0.577482	-0.247304	1.31249
+	2.07263	1.10479	sp|O43491|E41L2_HUMAN	EPB41L2	Band 4.1-like protein 2			n[305]ET[181]SESRGISR	Color2 [DarkGray]	1	4		1.05563e+06	-1.219	-0.413623	-1.20104	-0.362759	-1.40171	0.269007
+	2.22598	1.10216	sp|Q13439|GOGA4_HUMAN	GOLGA4	Golgin subfamily A member 4			n[305]ESLFRSS[167]SK	Color2 [DarkGray]	1	4		4.01019e+06	0.0147591	0.974525	0.372958	1.13108	-0.13077	1.45784
+	1.98864	1.10186	sp|O60716|CTND1_HUMAN	CTNND1	Catenin delta-1			n[305]YQEAAPNVANNTGPHAAS[167]CFGAK	Color2 [DarkGray]	1	4		5.68324e+06	-0.23931	1.01973	0.129808	0.903062	0.251352	1.52462
+	2.4613	1.10136	sp|Q9NWQ8|PHAG1_HUMAN	PAG1	Phosphoprotein associated with glycosphingolipid-enriched microdomains 1			n[305]RFSSLS[167]YK	Color2 [DarkGray]	1	4		22287960	0.762605	2.07784	1.25277	1.90416	0.928438	2.26592
+	3.52854	1.09963	sp|Q66K74|MAP1S_HUMAN	MAP1S	Microtubule-associated protein 1S			n[305]ASRPLS[167]AR	Color2 [DarkGray]	1	4		10756672	-0.268065	0.782783	-0.237823	0.673779	-0.37764	0.958794
+	2.64861	1.09961	sp|Q6WKZ4|RFIP1_HUMAN	RAB11FIP1	Rab11 family-interacting protein 1			n[305]KEGLS[167]FLGGLR	Color2 [DarkGray]	1	4		3.89883e+06	-1.15783	0.229328	-0.720567	-0.0187912	-0.917702	0.292205
+	2.05056	1.0993	sp|O75496|GEMI_HUMAN	GMNN	Geminin			n[305]ENELSAGLS[167]K	Color2 [DarkGray]	1	4		15689046	0.384426	1.76938	0.595193	1.20079	0.612519	1.91988
+	2.61725	1.0986	sp|Q9Y324|FCF1_HUMAN	FCF1	rRNA-processing protein FCF1 homolog			n[305]RMLS[167]LRDQR	Color2 [DarkGray]	1	4		9190529	0.226731	1.4784	0.612618	1.29402	0.127391	1.49014
+	1.28579	1.09795	sp|O43395|PRPF3_HUMAN	PRPF3	U4/U6 small nuclear ribonucleoprotein Prp3			n[305]T[181]PSSSQPERLPIGNTIQPSQAATFMNDAIEK	Color2 [DarkGray]	1	4		3.81605e+06	0.0731049	1.30893	0.315876	0.703358	-0.849231	0.821311
+	2.99258	1.09764	sp|O94913|PCF11_HUMAN	PCF11	Pre-mRNA cleavage complex 2 protein Pcf11			n[305]LNRIS[167]QHSHGK	Color2 [DarkGray]	1	4		8625319	-0.358514	0.89924	-0.192235	0.598059	-0.254617	0.99025
+	1.2609	1.09624	sp|Q5XPI4|RN123_HUMAN	RNF123	E3 ubiquitin-protein ligase RNF123			n[305]S[167]YRLTSDAEK	Color2 [DarkGray]	1	4		6736904	-0.304746	0.0664263	-0.40381	0.370183	-0.833397	1.31016
+	4.02587	1.09578	sp|Q9GZS1|RPA49_HUMAN	POLR1E	DNA-directed RNA polymerase I subunit RPA49			n[305]VGNES[167]LNR	Color2 [DarkGray]	1	4		44453508	1.63374	2.72482	1.51877	2.5593	1.59796	2.7537
+	2.01115	1.09481	sp|A0FGR8|ESYT2_HUMAN	ESYT2	Extended synaptotagmin-2			n[305]RERPPDHQHS[167]AQVK	Color2 [DarkGray]	1	4		3.30665e+06	-0.863369	0.349544	-0.645328	-0.0660572	-0.770881	0.721352
+	1.89335	1.09421	sp|Q96RU3|FNBP1_HUMAN	FNBP1	Formin-binding protein 1			n[305]IHCFRS[167]LK	Color2 [DarkGray]	1	4		44736840	1.60979	2.55468	1.9596	2.56285	1.43388	3.16836
+	2.40608	1.09401	sp|P53999|TCP4_HUMAN	SUB1	Activated RNA polymerase II transcriptional coactivator p15			n[305]ALSSSKQSS[167]SSRDDNM[147]FQIGK	Color2 [DarkGray]	1	4		909043	-1.90317	-1.06173	-1.90167	-0.954406	-1.9642	-0.470881
+	2.33191	1.09391	sp|Q96MW1|CCD43_HUMAN	CCDC43	Coiled-coil domain-containing protein 43			n[305]DSLRDES[167]QRK	Color2 [DarkGray]	1	4		14068287	-0.555706	0.870962	-0.187068	0.446246	-0.273731	0.948019
+	2.56484	1.09331	sp|Q9BZ72|PITM2_HUMAN	PITPNM2	Membrane-associated phosphatidylinositol transfer protein 2			n[305]TQS[167]QADGEQR	Color2 [DarkGray]	1	4		4.07008e+06	-1.14556	0.174953	-0.601827	0.121965	-0.978867	0.256759
+	2.65155	1.0931	sp|Q16666|IF16_HUMAN	IFI16	Gamma-interferon-inducible protein 16			n[305]GPALS[167]RK	Color2 [DarkGray]	1	4		29212208	1.582	2.889	1.87867	2.56359	1.71431	3.00168
+	2.13815	1.091	sp|O94874|UFL1_HUMAN	UFL1	E3 UFM1-protein ligase 1			n[305]ATEGS[167]GSMRGGGGGNAR	Color2 [DarkGray]	1	4		10899280	-0.0617905	1.25307	0.254608	0.753917	-0.118861	1.33998
+	2.79205	1.09097	sp|P11171|EPB41_HUMAN	EPB41	Protein 4.1			n[305]RLS[167]THSPFR	Color2 [DarkGray]	1	4		128491664	3.41016	4.4819	3.54358	4.32184	3.10688	4.5298
+	2.09117	1.09065	sp|Q96AV8|E2F7_HUMAN	E2F7	Transcription factor E2F7			n[305]NQS[167]RNTSSAQR	Color2 [DarkGray]	1	4		3.57382e+06	-1.92228	-0.993672	-1.60396	-0.900734	-2.06179	-0.421684
+	3.55973	1.09012	sp|Q9UJW0|DCTN4_HUMAN	DCTN4	Dynactin subunit 4			n[305]AGAS[167]ISTLAGLSLK	Color2 [DarkGray]	1	4		22949106	0.133646	1.14206	0.302414	1.36215	0.1681	1.37032
+	2.39754	1.08735	sp|P11717|MPRI_HUMAN	IGF2R	Cation-independent mannose-6-phosphate receptor			n[305]SS[167]NVSYKYSK	Color2 [DarkGray]	1	4		12630785	1.31802	2.40583	1.52789	2.17954	1.18607	2.70866
+	2.1684	1.08732	sp|Q9ULS5|TMCC3_HUMAN	TMCC3	Transmembrane and coiled-coil domain protein 3	YTHDF1, YTHDF2, YTHDF3	sp|Q7Z739|YTHD3_HUMAN, sp|Q9BYJ9|YTHD1_HUMAN, sp|Q9Y5A9|YTHD2_HUMAN	n[305]DIHRS[167]LK	Color2 [DarkGray]	1	4		8242535	1.26106	2.23218	1.42634	2.10987	1.13627	2.74359
+	2.62942	1.08727	sp|Q9UNZ2|NSF1C_HUMAN	NSFL1C	NSFL1 cofactor p47			n[305]FYAGGS[167]ER	Color2 [DarkGray]	1	4		7.30547e+06	-0.00105953	1.26659	0.13962	0.913071	0.188977	1.4097
+	2.79128	1.0872	sp|Q09666|AHNK_HUMAN	AHNAK	Neuroblast differentiation-associated protein AHNAK			n[305]LQGSGVSLAS[167]K	Color2 [DarkGray]	1	4		451617120	-0.524649	0.740826	-0.238841	0.456532	-0.6178	0.682963
+	1.66523	1.08704	sp|Q14517|FAT1_HUMAN	FAT1	Protocadherin Fat 1			n[305]HLGPATAFLQRPYFDS[167]K	Color2 [DarkGray]	1	4		3176827	-0.436496	0.804035	-0.0589194	0.246916	-0.641918	1.07284
+	2.05939	1.08696	sp|Q9UNZ2|NSF1C_HUMAN	NSFL1C	NSFL1 cofactor p47			n[305]GTAPSDNRVT[181]SFRDLIHDQDEDEEEEEGQR	Color2 [DarkGray]	1	4		6212061	0.644267	1.68556	0.257006	1.41673	0.855829	1.91568
+	3.24757	1.08529	sp|O75962|TRIO_HUMAN	TRIO	Triple functional domain protein			n[305]MALEDRPSSLLVDQGDSSSPSFNPSDNSLLSS[167]SSPIDEM[147]EER	Color2 [DarkGray]	1	4		1.85471e+06	-3.01418	-1.96426	-3.12645	-1.86446	-2.78135	-1.8374
+	3.09319	1.08476	sp|Q8IX03|KIBRA_HUMAN	WWC1	Protein KIBRA			n[305]LRGQS[167]CK	Color2 [DarkGray]	1	4		11604852	-0.305318	1.00829	0.0786281	0.993067	0.0116224	1.03786
+	2.00616	1.08414	sp|Q96IZ0|PAWR_HUMAN	PAWR	PRKC apoptosis WT1 regulator protein			n[305]Y[243]KSTTSVSEEDVSSR	Color2 [DarkGray]	1	4		2254856	-1.29269	-0.0998096	-0.86341	-0.234941	-1.01604	0.415042
+	2.44765	1.08414	sp|Q9NRP2|COXM2_HUMAN	CMC2	COX assembly mitochondrial protein 2 homolog			n[305]NEYVENRT[181]K	Color2 [DarkGray]	1	4		5.93145e+06	-0.159701	1.20867	0.343611	0.965078	0.0298281	1.2924
+	2.52741	1.08368	sp|Q9NYI0|PSD3_HUMAN	PSD3	PH and SEC7 domain-containing protein 3			n[305]S[167]SSM[147]GRPGR	Color2 [DarkGray]	1	4		2.0027e+06	-3.03425	-1.71285	-2.76228	-2.14188	-3.10652	-1.79728
+	2.80815	1.08266	sp|Q8IVF2|AHNK2_HUMAN	AHNAK2	Protein AHNAK2			n[305]T[181]GSGQGPSSTGQPGR	Color2 [DarkGray]	1	4		9713741	-1.98577	-0.870733	-1.83992	-1.11147	-2.19607	-0.791577
+	2.06575	1.08217	sp|P55011|S12A2_HUMAN	SLC12A2	Solute carrier family 12 member 2			n[305]LLRPS[167]LAELHDELEK	Color2 [DarkGray]	1	4		4.27537e+06	-1.22571	0.269685	-0.781105	-0.238494	-0.87912	0.329391
+	1.1858	1.08208	sp|Q6P2H3|CEP85_HUMAN	CEP85	Centrosomal protein of 85 kDa			n[305]CSS[167]VADSGDTAIGTSCSDIAEDFCSSSGS[167]PPFQPIK	Color2 [DarkGray]	1	4		9791970	-0.283856	0.179518	-0.248077	0.664824	-1.48152	0.38843
+	2.04703	1.08184	sp|Q14247|SRC8_HUMAN	CTTN	Src substrate cortactin			n[305]LQLHES[167]QK	Color2 [DarkGray]	1	4		34846688	3.12948	4.25107	3.03709	3.80611	3.21624	4.57114
+	1.61185	1.08133	sp|P55196|AFAD_HUMAN	AFDN	Afadin			n[305]EALRQAS[167]DKDDRPFQGEDVENSR	Color2 [DarkGray]	1	4		6053574	-0.0812912	0.954893	0.28812	0.647307	-0.554349	1.29426
+	3.9117	1.08124	sp|Q9NZN4|EHD2_HUMAN	EHD2	EH domain-containing protein 2			n[305]LPNS[167]VLGR	Color2 [DarkGray]	1	4		17680176	0.627873	1.89923	0.846381	1.8119	0.809078	1.81592
+	2.51176	1.08086	sp|Q96Q45|TM237_HUMAN	TMEM237	Transmembrane protein 237			n[305]SS[167]SSSLLR	Color2 [DarkGray]	1	4		16919362	-0.245859	1.2721	0.232599	0.944518	0.0390978	1.05179
+	1.4539	1.08065	sp|O43663|PRC1_HUMAN	PRC1	Protein regulator of cytokinesis 1			n[305]NFS[167]INSVASTYSEFAK	Color2 [DarkGray]	1	4		0	-3.02792	-2.10748	-3.93559	-2.45888	-2.91803	-2.07322
+	1.27898	1.08051	sp|Q96EK7|F120B_HUMAN	FAM120B	Constitutive coactivator of peroxisome proliferator-activated receptor gamma			n[305]AHWGS[167]HHAGR	Color2 [DarkGray]	1	4		3214682	-1.51572	-0.231199	-1.08631	-1.03275	-1.79389	0.109543
+	2.85392	1.08028	sp|Q15334|L2GL1_HUMAN	LLGL1	Lethal(2) giant larvae protein homolog 1			n[305]DAT[181]QASYR	Color2 [DarkGray]	1	4		34956244	1.62359	2.71122	1.68721	2.44651	1.38311	2.77701
+	3.44769	1.07994	sp|Q92804|RBP56_HUMAN	TAF15	TATA-binding protein-associated factor 2N			n[305]QSSYSQQPYNNQGQQQNMESS[167]GSQGGR	Color2 [DarkGray]	1	4		0	-3.92823	-2.84646	-3.74565	-2.64437	-3.93538	-2.87862
+	1.84361	1.07957	sp|Q6KC79|NIPBL_HUMAN	NIPBL	Nipped-B-like protein			n[305]TPITPQDINRPLNAAQCLS[167]QQEQTAFLPANQVPVLQQNTSVAAK	Color2 [DarkGray]	1	4		569106	-3.88633	-3.31405	-4.74713	-3.09123	-4.3443	-3.33377
+	2.27817	1.0786	sp|Q13148|TADBP_HUMAN	TARDBP	TAR DNA-binding protein 43			n[305]QLERS[167]GR	Color2 [DarkGray]	1	4		15031695	0.279744	1.32441	0.504285	1.15644	-0.105941	1.43304
+	2.42312	1.07836	sp|Q92522|H1X_HUMAN	H1-10	Histone H1.10			n[305]AAPGAAGS[167]RR	Color2 [DarkGray]	1	4		3.21969e+06	-0.682391	0.664111	-0.520281	0.255466	-0.362617	0.750206
+	2.79755	1.0782	sp|Q9NW75|GPTC2_HUMAN	GPATCH2	G patch domain-containing protein 2			n[305]LHGMS[167]SK	Color2 [DarkGray]	1	4		3827183	0.00371933	1.14381	-0.0413175	0.841305	0.0930901	1.30498
+	2.34879	1.07808	sp|Q9P2Q2|FRM4A_HUMAN	FRMD4A	FERM domain-containing protein 4A			n[305]LHS[167]LALHFR	Color2 [DarkGray]	1	4		1706469	-3.13533	-1.55058	-2.6635	-1.88888	-2.66048	-1.7856
+	2.88467	1.07748	sp|Q15654|TRIP6_HUMAN	TRIP6	Thyroid receptor-interacting protein 6			n[305]TGSLKPNPAS[167]PLPASPYGGPTPASYTTASTPAGPAFPVQVK	Color2 [DarkGray]	1	4		6.85224e+06	-0.614618	0.733098	-0.279399	0.537514	-0.283393	0.784431
+	2.219	1.07733	sp|O14523|C2C2L_HUMAN	C2CD2L	Phospholipid transfer protein C2CD2L			n[305]DHKVS[167]FLR	Color2 [DarkGray]	1	4		21544916	1.91076	3.19777	2.42271	3.18523	2.37172	3.55418
+	1.76873	1.07651	sp|Q6PJF5|RHDF2_HUMAN	RHBDF2	Inactive rhomboid protein 2			n[305]GRS[167]VLDATGQR	Color2 [DarkGray]	1	4		9074234	-0.805698	0.352645	-0.365836	0.0517921	-0.811186	0.842366
+	2.5716	1.07612	sp|Q9UBH6|XPR1_HUMAN	XPR1	Xenotropic and polytropic retrovirus receptor 1			n[305]Y[243]NQSIS[167]LRRPR	Color2 [DarkGray]	1	4		7.80515e+06	-1.12319	0.0760593	-0.974635	-0.209219	-0.944876	0.318813
+	2.15843	1.07582	sp|O43709|BUD23_HUMAN	BUD23	Probable 18S rRNA (guanine-N(7))-methyltransferase			n[305]ESVFTNERFPLRMS[167]R	Color2 [DarkGray]	1	4		12948942	-0.111949	1.22572	0.253017	0.7768	0.0163288	1.38236
+	3.01673	1.07566	sp|Q9NY93|DDX56_HUMAN	DDX56	Probable ATP-dependent RNA helicase DDX56			n[305]SQNPLRS[167]FK	Color2 [DarkGray]	1	4		61457852	-0.517355	0.758925	-0.191251	0.629344	-0.250257	0.879844
+	3.65376	1.07561	sp|Q8IVF2|AHNK2_HUMAN	AHNAK2	Protein AHNAK2			n[305]VDM[147]PS[167]FK	Color2 [DarkGray]	1	4		2.76955e+06	-0.867829	0.349983	-0.78743	0.102453	-0.783775	0.335361
+	2.24591	1.07545	sp|Q2KHT3|CL16A_HUMAN	CLEC16A	Protein CLEC16A			n[305]SRS[167]WVGGGHGK	Color2 [DarkGray]	1	4		16609680	1.71897	2.84163	1.90517	2.48473	1.41068	2.9348
+	3.01031	1.07528	sp|O75534|CSDE1_HUMAN	CSDE1	Cold shock domain-containing protein E1			n[305]HT[181]GAVSAR	Color2 [DarkGray]	1	4		3291382	-1.08144	0.0353031	-0.842307	-0.0542698	-1.04188	0.279177
+	1.66514	1.07477	sp|Q9NS25|SPNXB_HUMAN	SPANXB1	Sperm protein associated with the nucleus on the X chromosome B1	SPANXA1, SPANXC, SPANXD	sp|Q9BXN6|SPNXD_HUMAN, sp|Q9NS26|SPNXA_HUMAN, sp|Q9NY87|SPNXC_HUMAN	n[305]TSES[167]STILVVR	Color2 [DarkGray]	1	4		12983220	0.806916	2.19866	1.54889	1.87319	1.04415	2.5524
+	2.73978	1.07476	sp|Q53EL6|PDCD4_HUMAN	PDCD4	Programmed cell death protein 4			n[305]NS[167]SRDS[167]GRGDSVSDSGSDALR	Color2 [DarkGray]	1	4		15631257	-2.1636	-1.04579	-1.8	-0.856608	-1.87858	-0.715498
+	2.36494	1.07447	sp|Q7Z460|CLAP1_HUMAN	CLASP1	CLIP-associating protein 1			n[305]NSSNTSVGS[167]PSNTIGRTPSR	Color2 [DarkGray]	1	4		2663627	-1.57889	-0.717774	-1.71084	-0.880312	-2.1251	-0.593324
+	2.93927	1.07424	sp|Q6Y7W6|GGYF2_HUMAN	GIGYF2	GRB10-interacting GYF protein 2			n[305]WRPHS[167]PDGPRS[167]AGWR	Color2 [DarkGray]	1	4		16246584	-0.194712	1.0335	-0.264157	0.753842	0.0409737	1.01748
+	3.08584	1.07416	sp|Q09666|AHNK_HUMAN	AHNAK	Neuroblast differentiation-associated protein AHNAK			n[305]MPFLS[167]ISSPK	Color2 [DarkGray]	1	4		0	-1.34109	-0.04459	-1.15879	-0.197604	-0.980274	-0.0154934
+	2.70033	1.07308	sp|Q92597|NDRG1_HUMAN	NDRG1	Protein NDRG1			n[305]S[167]RTASGSSVTSLDGTR	Color2 [DarkGray]	1	4		90828416	-0.229911	0.91431	0.101601	0.826821	-0.156022	1.19378
+	2.04718	1.07214	sp|O00622|CCN1_HUMAN	CCN1	CCN family member 1			n[305]ICEVRPCGQPVYSS[167]LK	Color2 [DarkGray]	1	4		47131280	1.29066	2.95049	1.75467	2.33299	1.56928	2.54755
+	2.97916	1.07214	sp|Q7Z460|CLAP1_HUMAN	CLASP1	CLIP-associating protein 1			n[305]NSSNT[181]SVGSPSNTIGRTPSR	Color2 [DarkGray]	1	4		2.23157e+06	-2.2886	-1.01102	-1.87728	-1.10178	-2.13313	-0.969781
+	1.82811	1.07127	sp|Q9BW19|KIFC1_HUMAN	KIFC1	Kinesin-like protein KIFC1			n[305]APSQLPLSGS[167]RLK	Color2 [DarkGray]	1	4		5121437	-0.205433	1.15118	0.435033	0.848172	0.0372438	1.48131
+	3.16516	1.07049	sp|Q5VUA4|ZN318_HUMAN	ZNF318	Zinc finger protein 318			n[305]FGS[167]FLCHK	Color2 [DarkGray]	1	4		3.92035e+06	0.0242653	0.956469	-0.103216	0.824481	-0.251941	1.09963
+	2.47273	1.06937	sp|Q8TEJ3|SH3R3_HUMAN	SH3RF3	E3 ubiquitin-protein ligase SH3RF3			n[305]LLAGAS[167]TK	Color2 [DarkGray]	1	4		1.59556e+06	-1.64991	-0.293137	-1.43557	-0.701317	-1.35203	-0.23494
+	2.7096	1.06885	sp|P49757|NUMB_HUMAN	NUMB	Protein numb homolog	NUMBL	sp|Q9Y6R0|NUMBL_HUMAN	n[305]QGS[167]FRGFPALS[167]QK	Color2 [DarkGray]	1	4		3.92534e+06	-0.0426035	1.11538	0.289444	0.972808	-0.0829287	1.28226
+	2.64434	1.06805	sp|Q9BXB5|OSB10_HUMAN	OSBPL10	Oxysterol-binding protein-related protein 10			n[305]AVQGTDGGGGSNSSSRSS[167]SR	Color2 [DarkGray]	1	4		14101763	-1.17113	0.0237656	-0.788929	0.02847	-0.864854	0.326998
+	2.44383	1.06747	sp|Q09666|AHNK_HUMAN	AHNAK	Neuroblast differentiation-associated protein AHNAK			n[305]FGT[181]FGGLGS[167]K	Color2 [DarkGray]	1	4		5586908	-1.77936	-0.572055	-1.58834	-0.662816	-1.33918	-0.269588
+	1.77641	1.06738	sp|P49756|RBM25_HUMAN	RBM25	RNA-binding protein 25			n[305]LGASNS[167]PGQPNSVK	Color2 [DarkGray]	1	4		3.04951e+06	-0.364193	1.07027	0.280031	0.598035	-0.250528	1.19913
+	2.99458	1.06706	sp|Q69YN4|VIR_HUMAN	VIRMA	Protein virilizer homolog			n[305]HVRS[167]FTR	Color2 [DarkGray]	1	4		2534998	-0.636982	0.67475	-0.39713	0.45749	-0.320532	0.71431
+	2.82131	1.06676	sp|Q96EK9|KTI12_HUMAN	KTI12	Protein KTI12 homolog			n[305]NVS[167]VSWRPR	Color2 [DarkGray]	1	4		3.92818e+06	-0.757914	0.39886	-0.436363	0.369323	-0.551763	0.686068
+	2.01275	1.06658	sp|Q9H2H0|CXXC4_HUMAN	CXXC4	CXXC-type zinc finger protein 4			n[305]NDS[167]QRLGK	Color2 [DarkGray]	1	4		1.01611e+06	-0.9453	-0.440664	-1.12906	-0.0181189	-1.50985	0.0743084
+	2.21238	1.0663	sp|Q8TDD1|DDX54_HUMAN	DDX54	ATP-dependent RNA helicase DDX54			n[305]GLS[167]ISGEGGAFEQQAAGAVLDLM[147]GDEAQNLTR	Color2 [DarkGray]	1	4		4.80102e+06	-1.70839	-0.386191	-1.5749	-0.712198	-1.23523	-0.22125
+	2.23875	1.066	sp|Q8WYP3|RIN2_HUMAN	RIN2	Ras and Rab interactor 2			n[305]T[181]ETQTSM[147]PETVNHNK	Color2 [DarkGray]	1	4		923425	-2.05134	-1.12663	-2.60988	-1.4285	-2.19138	-1.09948
+	2.3303	1.06588	sp|Q6XZF7|DNMBP_HUMAN	DNMBP	Dynamin-binding protein			n[305]GSS[167]VSASR	Color2 [DarkGray]	1	4		27475056	0.807277	1.77269	0.707647	1.44421	0.530676	2.02633
+	1.49923	1.06561	sp|P42167|LAP2B_HUMAN	TMPO	Lamina-associated polypeptide 2, isoforms beta/gamma			n[305]EM[147]FPYEASTPT[181]GISASCRRPIK	Color2 [DarkGray]	1	4		53649728	2.93998	4.23158	3.60658	3.99605	3.36626	4.882
+	3.21529	1.06556	sp|Q66K74|MAP1S_HUMAN	MAP1S	Microtubule-associated protein 1S			n[305]ESVGSRDS[167]SKR	Color2 [DarkGray]	1	4		39311164	0.901867	2.1593	1.09453	2.22683	1.19636	2.00331
+	2.7369	1.06552	sp|Q9NQW6|ANLN_HUMAN	ANLN	Anillin			n[305]QNS[167]VQEQPGTACLSK	Color2 [DarkGray]	1	4		125103312	1.72183	3.02936	2.03197	2.69023	1.76823	2.99899
+	2.53998	1.06533	sp|Q08722|CD47_HUMAN	CD47	Leukocyte surface antigen CD47			n[305]AVEEPLNAFKES[167]K	Color2 [DarkGray]	1	4		4819416	-0.375568	0.675242	-0.277941	0.697838	-0.0718117	1.0976
+	2.2907	1.0652	sp|Q9NYJ8|TAB2_HUMAN	TAB2	TGF-beta-activated kinase 1 and MAP3K7-binding protein 2			n[305]DQRS[167]IIK	Color2 [DarkGray]	1	4		1.32127e+06	-1.01259	0.188673	-0.694434	-0.111702	-0.952621	0.458987
+	2.41451	1.06425	sp|Q96RK0|CIC_HUMAN	CIC	Protein capicua homolog			n[305]RPESVGGLEPPGPSVIAAPPS[167]GGGNILQTLVLPPNK	Color2 [DarkGray]	1	4		97883576	1.92766	2.88273	1.5948	3.07332	2.17284	2.93201
+	1.30907	1.06419	sp|Q9HCK8|CHD8_HUMAN	CHD8	Chromodomain-helicase-DNA-binding protein 8			n[305]ES[167]TAPAPESITLHDYTTQPASQEQPAQPVLQTSTPTSGLLQVSK	Color2 [DarkGray]	1	4		2.02305e+06	-1.38476	-0.114253	-0.944097	-0.44357	-2.116	-0.694454
+	1.86884	1.0636	sp|Q9NS91|RAD18_HUMAN	RAD18	E3 ubiquitin-protein ligase RAD18			n[305]VYTPVASRQS[167]LK	Color2 [DarkGray]	1	4		37544116	-0.97333	0.577492	-0.162879	0.322798	-0.530344	0.623971
+	3.15889	1.0632	sp|Q9UBP0|SPAST_HUMAN	SPAST	Spastin			n[305]APSYS[167]GLSM[147]VSGVK	Color2 [DarkGray]	1	4		10978160	-0.829178	0.255887	-0.978837	0.0518656	-0.731297	0.342533
+	1.94904	1.06272	sp|Q8IUD2|RB6I2_HUMAN	ERC1	ELKS/Rab6-interacting/CAST family member 1			n[305]RT[181]NSTGGSSGSS[167]VGGGSGK	Color2 [DarkGray]	1	4		1.9442e+06	-2.38158	-1.10405	-2.54808	-1.76253	-2.22622	-1.10115
+	1.89219	1.06258	sp|Q9Y6M5|ZNT1_HUMAN	SLC30A1	Zinc transporter 1			n[305]STRPGSSDINVAPGEQGPDQEETNTLVANTS[167]NSNGLK	Color2 [DarkGray]	1	4		3.12949e+06	-1.3563	0.179389	-1.12211	-0.429796	-0.828454	0.131277
+	2.02841	1.06242	sp|O75382|TRIM3_HUMAN	TRIM3	Tripartite motif-containing protein 3			n[305]RPS[167]SMYSTGGK	Color2 [DarkGray]	1	4		8867267	-0.068821	1.25901	0.292045	1.07145	0.508974	1.589
+	2.69428	1.06134	sp|Q13247|SRSF6_HUMAN	SRSF6	Serine/arginine-rich splicing factor 6			n[305]S[167]GGGGYSSR	Color2 [DarkGray]	1	4		5.573e+06	-1.1203	0.158973	-0.976301	0.121421	-0.624331	0.182703
+	2.26126	1.06134	sp|Q96PE2|ARHGH_HUMAN	ARHGEF17	Rho guanine nucleotide exchange factor 17			n[305]GS[167]NPLDGRDSPSAGGPVGQLEPIPIPAPAS[167]PGTRPTLK	Color2 [DarkGray]	1	4		5519407	-0.846528	0.719196	-0.346559	0.545053	-0.3912	0.335478
+	2.3897	1.06074	sp|Q13151|ROA0_HUMAN	HNRNPA0	Heterogeneous nuclear ribonucleoprotein A0			n[305]EDS[167]ARPGAHAK	Color2 [DarkGray]	1	4		3.01679e+06	-0.451997	0.952395	-0.252328	0.512824	-0.0800314	0.932657
+	2.40916	1.06066	sp|P09651|ROA1_HUMAN	HNRNPA1	Heterogeneous nuclear ribonucleoprotein A1			n[305]NQGGYGGSSSSSSYGS[167]GRR	Color2 [DarkGray]	1	4		60416484	-0.643946	0.58213	-0.595727	0.0520058	-0.790925	0.517244
+	1.30412	1.06026	sp|Q15629|TRAM1_HUMAN	TRAM1	Translocating chain-associated membrane protein 1			n[305]KKPT[181]VTK	Color2 [DarkGray]	1	4		74854608	1.62374	2.98263	2.64213	2.74659	1.62568	3.34312
+	3.52754	1.05953	sp|Q09666|AHNK_HUMAN	AHNAK	Neuroblast differentiation-associated protein AHNAK			n[305]LS[167]SSSSNDSGNK	Color2 [DarkGray]	1	4		10671178	0.531883	1.47566	0.416763	1.44228	0.226439	1.43573
+	3.98338	1.05924	sp|Q8N1W1|ARG28_HUMAN	ARHGEF28	Rho guanine nucleotide exchange factor 28			n[305]TFS[167]FLM[147]NR	Color2 [DarkGray]	1	4		6.747e+06	0.432494	1.44123	0.401775	1.4484	0.506504	1.62888
+	2.42584	1.05902	sp|O43790|KRT86_HUMAN	KRT86	Keratin, type II cuticular Hb6			n[305]VGVCGGS[167]CKR	Color2 [DarkGray]	1	4		5.01561e+06	-0.884776	0.326673	-0.609095	0.0207157	-0.778784	0.557028
+	2.41894	1.0588	sp|O15525|MAFG_HUMAN	MAFG	Transcription factor MafG	MAFF, MAFK	sp|O60675|MAFK_HUMAN, sp|Q9ULX9|MAFF_HUMAN	n[305]GY[243]AASCR	Color2 [DarkGray]	1	4		8.34246e+06	0.822949	2.19255	1.11904	1.75728	1.05605	2.22464
+	1.57607	1.05825	sp|Q14315|FLNC_HUMAN	FLNC	Filamin-C			n[305]GS[167]SYSSIPK	Color2 [DarkGray]	1	4		85131928	1.56576	3.3394	2.3616	3.00758	2.50396	3.2591
+	3.98216	1.05824	sp|Q6PKG0|LARP1_HUMAN	LARP1	La-related protein 1			n[305]RCPSQSSSRPAAM[147]IS[167]QPPTPPTGQPVREDAK	Color2 [DarkGray]	1	4		6.64797e+06	0.115393	1.20479	0.128352	1.21886	0.306904	1.30171
+	1.73437	1.0581	sp|Q15149|PLEC_HUMAN	PLEC	Plectin			n[305]TAQLERS[167]LQEEHVAVAQLR	Color2 [DarkGray]	1	4		145813824	-0.808956	0.542152	-0.354866	0.104131	-1.18486	0.179344
+	1.60571	1.05721	sp|Q92620|PRP16_HUMAN	DHX38	Pre-mRNA-splicing factor ATP-dependent RNA helicase PRP16			n[305]DRDRS[167]VR	Color2 [DarkGray]	1	4		2.33409e+06	-1.59996	-0.094799	-1.16812	-0.75884	-1.14453	0.112649
+	1.82343	1.05713	sp|P04920|B3A2_HUMAN	SLC4A2	Anion exchange protein 2			n[305]GS[167]TQS[167]GREGREPGPTPR	Color2 [DarkGray]	1	4		8967040	-0.582086	0.957815	-0.136406	0.817169	-0.44677	0.231157
+	1.97511	1.0565	sp|P46013|KI67_HUMAN	MKI67	Proliferation marker protein Ki-67			n[305]QTPAPAASVTGS[167]R	Color2 [DarkGray]	1	4		5153188	-0.0331116	0.925217	-0.19417	0.446666	-0.47052	1.09982
+	2.41145	1.05639	sp|Q9UHK0|NUFP1_HUMAN	NUFIP1	Nuclear fragile X mental retardation-interacting protein 1			n[305]QS[167]SDRFPR	Color2 [DarkGray]	1	4		5.10635e+06	0.165516	1.22555	0.0175738	0.791214	0.0111694	1.34666
+	3.32451	1.05631	sp|Q96FK6|WDR89_HUMAN	WDR89	WD repeat-containing protein 89			n[305]VHS[167]NDSYKR	Color2 [DarkGray]	1	4		3902698	-0.141488	0.884116	-0.0226054	0.883909	-0.366906	0.869904
+	3.24547	1.05606	sp|O75821|EIF3G_HUMAN	EIF3G	Eukaryotic translation initiation factor 3 subunit G			n[305]RGES[167]M[147]QPNRR	Color2 [DarkGray]	1	4		5.73551e+06	-1.52838	-0.560903	-1.82458	-0.724678	-1.63011	-0.529299
+	1.90745	1.05562	sp|Q5VV42|CDKAL_HUMAN	CDKAL1	Threonylcarbamoyladenosine tRNA methylthiotransferase			n[305]NPAEDHFRNS[167]IKK	Color2 [DarkGray]	1	4		16311810	0.516049	2.07663	0.938206	1.56647	1.1015	2.07951
+	3.43028	1.0547	sp|Q12778|FOXO1_HUMAN	FOXO1	Forkhead box protein O1			n[305]AAS[167]MDNNSK	Color2 [DarkGray]	1	4		7668018	-0.0427856	1.06955	0.134173	1.09996	0.188948	1.27494
+	2.31998	1.0546	sp|Q09666|AHNK_HUMAN	AHNAK	Neuroblast differentiation-associated protein AHNAK			n[305]VSVGAPDLSLEASEGS[167]IK	Color2 [DarkGray]	1	4		56992552	-1.80848	-0.313264	-1.51184	-0.607546	-1.23494	-0.470649
+	3.64328	1.05424	sp|P29966|MARCS_HUMAN	MARCKS	Myristoylated alanine-rich C-kinase substrate			n[305]AEDGATPS[167]PSNET[181]PK	Color2 [DarkGray]	1	4		20998666	0.707595	1.70819	0.605354	1.7722	0.855678	1.85096
+	2.27091	1.05404	sp|Q15056|IF4H_HUMAN	EIF4H	Eukaryotic translation initiation factor 4H			n[305]GM[147]GS[167]SRESR	Color2 [DarkGray]	1	4		4259419	-1.43766	-0.246128	-1.30409	-0.58709	-1.21539	0.0382137
+	2.30314	1.05353	sp|Q9UDY2|ZO2_HUMAN	TJP2	Tight junction protein ZO-2			n[305]RGY[243]YGQSAR	Color2 [DarkGray]	1	4		8389106	0.851607	2.12084	1.16268	1.8381	1.16439	2.38034
+	1.99575	1.05325	sp|Q13017|RHG05_HUMAN	ARHGAP5	Rho GTPase-activating protein 5			n[305]LRLYHDS[167]TNIDK	Color2 [DarkGray]	1	4		7061930	-0.16848	0.945339	0.0408654	0.671358	0.00872612	1.42417
+	2.39343	1.05316	sp|Q15036|SNX17_HUMAN	SNX17	Sorting nexin-17	NLRP11	rev_sp|A5PKW4|PSD1_HUMAN, sp|P59045|NAL11_HUMAN	n[305]SGGS[167]IRK	Color2 [DarkGray]	1	4		37754264	2.81648	3.95506	3.19962	4.05959	3.20298	4.36391
+	4.11776	1.05284	sp|P55196|AFAD_HUMAN	AFDN	Afadin			n[305]LFS[167]QGQDVSNK	Color2 [DarkGray]	1	4		30999196	-0.105901	0.985526	-0.219847	0.862753	-0.041997	0.94251
+	1.62048	1.0528	sp|Q7Z569|BRAP_HUMAN	BRAP	BRCA1-associated protein			n[305]QEIQEGQINIAMASAS[167]SPASSGGSGKLPSRK	Color2 [DarkGray]	1	4		2811960	-2.19482	-0.633024	-1.23996	-0.879288	-1.73658	-0.500655
+	3.28588	1.05136	sp|O43709|BUD23_HUMAN	BUD23	Probable 18S rRNA (guanine-N(7))-methyltransferase			n[305]FPLRMS[167]RR	Color2 [DarkGray]	1	4		1621874	-0.454515	0.483211	-0.462698	0.420634	-0.630364	0.702663
+	2.48889	1.05132	sp|Q09666|AHNK_HUMAN	AHNAK	Neuroblast differentiation-associated protein AHNAK			n[305]IS[167]MPDIDLNLTGPK	Color2 [DarkGray]	1	4		31011862	0.0227394	1.39344	0.0916228	0.960275	-0.0468197	0.867792
+	1.99288	1.05114	sp|P29317|EPHA2_HUMAN	EPHA2	Ephrin type-A receptor 2			n[305]QSPEDVYFS[167]K	Color2 [DarkGray]	1	4		35605600	0.016057	1.28865	0.585107	1.02027	-0.023407	1.42224
+	2.68579	1.05109	sp|P02751|FINC_HUMAN	FN1	Fibronectin			n[305]TNTNVNCPIECFM[147]PLDVQADREDS[167]RE	Color2 [DarkGray]	1	4		0	-2.93691	-1.64418	-2.55734	-1.55116	-2.46119	-1.60682
+	2.08267	1.05084	sp|Q8IWC1|MA7D3_HUMAN	MAP7D3	MAP7 domain-containing protein 3			n[305]DTSIQEVVS[167]RPSSK	Color2 [DarkGray]	1	4		13230531	1.26834	2.70773	1.75135	2.2555	1.57002	2.77898
+	2.66499	1.05059	sp|Q7Z5Q1|CPEB2_HUMAN	CPEB2	Cytoplasmic polyadenylation element-binding protein 2			n[305]NS[167]YNHHQPLLK	Color2 [DarkGray]	1	4		8700559	-0.773684	0.442743	-0.631858	0.196648	-0.483029	0.623797
+	2.13197	1.05029	sp|Q14157|UBP2L_HUMAN	UBAP2L	Ubiquitin-associated protein 2-like			n[305]DRDRDY[243]SR	Color2 [DarkGray]	1	4		4713983	-1.31418	0.140736	-0.834021	-0.251716	-0.897073	0.216579
+	1.81878	1.05	sp|Q8TBZ3|WDR20_HUMAN	WDR20	WD repeat-containing protein 20			n[305]FATLS[167]LHDRK	Color2 [DarkGray]	1	4		58647692	0.230654	1.3383	0.918622	1.45663	0.244929	1.74927
+	1.93836	1.04976	sp|Q8IY63|AMOL1_HUMAN	AMOTL1	Angiomotin-like protein 1			n[305]GQQQQQQQQGAVGHGYYM[147]AGGT[181]SQK	Color2 [DarkGray]	1	4		2.38881e+06	-1.54171	-0.0816545	-1.24434	-0.724088	-1.24141	-0.0724306
+	2.61431	1.04976	sp|P41208|CETN2_HUMAN	CETN2	Centrin-2			n[305]ANMAS[167]SSQR	Color2 [DarkGray]	1	4		6.11461e+06	-0.555609	0.774222	-0.245083	0.487333	-0.230468	0.856574
+	1.70581	1.04975	sp|P02686|MBP_HUMAN	MBP	Myelin basic protein			n[305]ASTNSETNRGES[167]EKK	Color2 [DarkGray]	1	4		109482920	1.72186	2.79769	2.18542	2.63691	1.24997	2.8719
+	1.4882	1.04967	sp|Q86X29|LSR_HUMAN	LSR	Lipolysis-stimulated lipoprotein receptor			n[305]ERPPADPRS[167]HHHR	Color2 [DarkGray]	1	4		431691	-2.36314	-1.01169	-1.8057	-1.58349	-2.18597	-0.610614
+	2.39473	1.0496	sp|Q96PK6|RBM14_HUMAN	RBM14	RNA-binding protein 14			n[305]LSESQLS[167]FRRS[167]PTK	Color2 [DarkGray]	1	4		15123445	0.0661402	1.4265	0.560888	1.19604	0.386669	1.53997
+	3.85249	1.04943	sp|Q9NVM9|INT13_HUMAN	INTS13	Integrator complex subunit 13			n[305]LNS[167]VNNR	Color2 [DarkGray]	1	4		38076732	1.33567	2.3032	1.43637	2.44216	1.22509	2.40006
+	2.30638	1.04893	sp|O15357|SHIP2_HUMAN	INPPL1	Phosphatidylinositol 3,4,5-trisphosphate 5-phosphatase 2			n[305]TLAT[181]SCRR	Color2 [DarkGray]	1	4		2699111	-0.385122	0.458075	-0.554918	0.232862	-0.75311	0.76271
+	2.97886	1.04846	sp|Q8TEU7|RPGF6_HUMAN	RAPGEF6	Rap guanine nucleotide exchange factor 6			n[305]EIPARQS[167]R	Color2 [DarkGray]	1	4		9995939	0.549554	1.78095	0.745409	1.4751	0.638332	1.82264
+	3.77586	1.04755	sp|O60343|TBCD4_HUMAN	TBC1D4	TBC1 domain family member 4			n[305]CS[167]SVTGVQR	Color2 [DarkGray]	1	4		40910748	2.11774	3.24553	2.32377	3.29407	2.12423	3.16878
+	2.10197	1.04752	sp|Q9H3Q1|BORG4_HUMAN	CDC42EP4	Cdc42 effector protein 4			n[305]DMLGS[167]LRDSALFVK	Color2 [DarkGray]	1	4		18725340	-0.0566788	1.24951	0.441021	1.01953	0.291428	1.5493
+	2.63059	1.04718	sp|P35637|FUS_HUMAN	FUS	RNA-binding protein FUS			n[305]MDS[167]RGEHR	Color2 [DarkGray]	1	4		19412434	0.343161	1.53624	0.48089	1.18539	0.435459	1.67943
+	3.11881	1.047	sp|Q9NQW6|ANLN_HUMAN	ANLN	Anillin			n[305]T[181]QSLPVTEK	Color2 [DarkGray]	1	4		816901696	1.03287	2.25217	1.3089	2.28645	1.09723	2.04138
+	2.14958	1.04675	sp|Q14315|FLNC_HUMAN	FLNC	Filamin-C			n[305]LTRT[181]FTR	Color2 [DarkGray]	1	4		3.39029e+06	-0.549004	0.785647	0.0787597	0.71513	-0.145153	1.02407
+	3.45666	1.04669	sp|O75131|CPNE3_HUMAN	CPNE3	Copine-3			n[305]ISLNS[167]LCYGDMDK	Color2 [DarkGray]	1	4		1.47627e+06	0.00739765	1.15873	-0.0967956	1.05956	0.186786	1.01915
+	3.78739	1.04607	sp|Q6IQ23|PKHA7_HUMAN	PLEKHA7	Pleckstrin homology domain-containing family A member 7			n[305]LY[243]SGDHQR	Color2 [DarkGray]	1	4		3.4088e+06	-0.346835	0.685245	-0.421025	0.516278	-0.406119	0.762722
+	2.17058	1.04577	sp|Q96QZ7|MAGI1_HUMAN	MAGI1	Membrane-associated guanylate kinase, WW and PDZ domain-containing protein 1			n[305]DPKGS[167]REYSR	Color2 [DarkGray]	1	4		2.07943e+06	-2.12934	-0.815414	-1.96201	-1.15275	-1.65872	-0.644594
+	3.65909	1.04571	sp|O75376|NCOR1_HUMAN	NCOR1	Nuclear receptor corepressor 1			n[305]AGETVRS[167]R	Color2 [DarkGray]	1	4		7.43306e+06	-1.49213	-0.577421	-1.75463	-0.64585	-1.66152	-0.547879
+	2.15816	1.04514	sp|Q9P0V3|SH3B4_HUMAN	SH3BP4	SH3 domain-binding protein 4			n[305]DNPFFRS[167]K	Color2 [DarkGray]	1	4		57561600	1.84772	3.18582	2.27295	2.92095	2.27923	3.42855
+	2.0432	1.04504	sp|O60869|EDF1_HUMAN	EDF1	Endothelial differentiation-related factor 1			n[305]RGEDVETS[167]K	Color2 [DarkGray]	1	4		6.9867e+06	0.0704317	1.06452	0.0249982	0.676332	-0.0611677	1.42854
+	2.25064	1.04423	sp|P04792|HSPB1_HUMAN	HSPB1	Heat shock protein beta-1			n[305]ALS[167]RQLS[167]SGVSEIR	Color2 [DarkGray]	1	4		33781964	0.296467	1.34814	0.0747571	0.883095	-0.18095	1.09172
+	2.61389	1.04358	sp|P53667|LIMK1_HUMAN	LIMK1	LIM domain kinase 1			n[305]S[167]CSIDRSPGAGSLGS[167]PASQRK	Color2 [DarkGray]	1	4		12745363	0.407621	1.39305	0.34017	1.5494	0.751797	1.68787
+	3.26683	1.04348	sp|Q9H4B6|SAV1_HUMAN	SAV1	Protein salvador homolog 1			n[305]NLM[147]PS[167]FIR	Color2 [DarkGray]	1	4		3.55684e+06	-1.01597	0.0977316	-1.06915	-0.152548	-0.937795	0.162351
+	2.14153	1.04292	sp|Q9C0B5|ZDHC5_HUMAN	ZDHHC5	Palmitoyltransferase ZDHHC5			n[305]S[167]EPSLEPESFRS[167]PTFGK	Color2 [DarkGray]	1	4		2994314	-0.647602	0.854768	-0.249915	0.314431	-0.312295	0.749746
+	2.48681	1.04269	sp|O60285|NUAK1_HUMAN	NUAK1	NUAK family SNF1-like kinase 1			n[305]VT[181]SHSLSCR	Color2 [DarkGray]	1	4		4.66411e+06	-0.857376	0.3694	-0.870084	-0.0635481	-0.675397	0.419361
+	1.47536	1.04264	sp|Q86WR7|PRSR2_HUMAN	PROSER2	Proline and serine-rich protein 2			n[305]LRAFS[167]RGGS[167]LESR	Color2 [DarkGray]	1	4		21043228	0.0686579	1.81872	1.04129	1.75362	1.05411	1.71965
+	3.41694	1.04235	sp|O60784|TOM1_HUMAN	TOM1	Target of Myb protein 1			n[305]GSS[167]LADQRK	Color2 [DarkGray]	1	4		153862032	4.55408	5.82258	4.73573	5.58851	4.75266	5.75842
+	1.87683	1.04174	sp|Q9BRR8|GPTC1_HUMAN	GPATCH1	G patch domain-containing protein 1			n[305]IY[243]GCALPPGSSEGSEGEDDDYLPDNVTFAPK	Color2 [DarkGray]	1	4		35764636	-0.193889	1.08202	-0.25968	0.86709	0.454851	1.17738
+	2.35057	1.04129	sp|Q03405|UPAR_HUMAN	PLAUR	Urokinase plasminogen activator surface receptor			n[305]HQS[167]LQCR	Color2 [DarkGray]	1	4		45836104	0.281557	1.61952	0.563638	1.18241	0.517542	1.68469
+	3.51485	1.04128	sp|P52272|HNRPM_HUMAN	HNRNPM	Heterogeneous nuclear ribonucleoprotein M			n[305]MGS[167]GVER	Color2 [DarkGray]	1	4		189274976	1.6256	2.653	1.45224	2.42116	1.46668	2.5942
+	2.70741	1.04122	sp|Q9UDY2|ZO2_HUMAN	TJP2	Tight junction protein ZO-2			n[305]RELS[167]GWLR	Color2 [DarkGray]	1	4		4.71227e+06	-1.11567	0.254452	-0.669173	0.110836	-0.935283	0.0382385
+	1.42514	1.04037	sp|P06748|NPM_HUMAN	NPM1	Nucleophosmin			n[305]T[181]VSLGAGAK	Color2 [DarkGray]	1	4		2.92622e+06	-2.08021	-0.230229	-1.04837	-0.475229	-1.12961	-0.431636
+	2.84075	1.04024	sp|A0JNW5|UH1BL_HUMAN	UHRF1BP1L	UHRF1-binding protein 1-like			n[305]SQSS[167]LSGKPK	Color2 [DarkGray]	1	4		40946264	-0.550292	0.806008	-0.264708	0.447581	-0.38861	0.663516
+	2.79489	1.04004	sp|P53999|TCP4_HUMAN	SUB1	Activated RNA polymerase II transcriptional coactivator p15			n[305]ALS[167]SSKQSSSSRDDNMFQIGK	Color2 [DarkGray]	1	4		639453	-2.49348	-1.3757	-2.12114	-1.37782	-2.54351	-1.28448
+	2.6897	1.0394	sp|Q96JY6|PDLI2_HUMAN	PDLIM2	PDZ and LIM domain protein 2			n[305]LSYSGRPGS[167]R	Color2 [DarkGray]	1	4		7.79902e+06	0.439309	1.66788	0.559929	1.30492	0.606369	1.75101
+	3.12647	1.03938	sp|Q8IVF2|AHNK2_HUMAN	AHNAK2	Protein AHNAK2			n[305]GFQS[167]GVGR	Color2 [DarkGray]	1	4		1.90594e+06	-1.52566	-0.477606	-1.67211	-0.787725	-1.69463	-0.508928
+	3.34016	1.03897	sp|P34910|EVI2B_HUMAN	EVI2B	Protein EVI2B			n[305]S[167]PFADGETPDICMDNIRENEISTK	Color2 [DarkGray]	1	4		18369638	-1.74212	-0.789584	-1.75782	-0.891	-1.89815	-0.600588
+	3.24993	1.03853	sp|Q9UDY2|ZO2_HUMAN	TJP2	Tight junction protein ZO-2			n[305]LNS[167]HGGR	Color2 [DarkGray]	1	4		57905704	-1.10114	-0.031374	-1.2529	-0.320516	-1.30676	-0.19331
+	2.07854	1.03792	sp|Q15464|SHB_HUMAN	SHB	SH2 domain-containing adapter protein B			n[305]ERDFEDPYNGPGSS[167]LRK	Color2 [DarkGray]	1	4		26211966	0.101237	1.38479	0.777733	1.35634	0.371817	1.62343
+	1.60392	1.03595	sp|Q92738|US6NL_HUMAN	USP6NL	USP6 N-terminal-like protein			n[305]RHEHS[167]PHPQS[167]R	Color2 [DarkGray]	1	4		504333	-3.20488	-2.60916	-4.04574	-2.82301	-4.09068	-2.80128
+	3.97311	1.03582	sp|Q6R327|RICTR_HUMAN	RICTOR	Rapamycin-insensitive companion of mTOR			n[305]NS[167]FHLLR	Color2 [DarkGray]	1	4		1.48517e+06	-1.65515	-0.716321	-1.71628	-0.699553	-1.66538	-0.513483
+	2.17209	1.03376	sp|Q69YN4|VIR_HUMAN	VIRMA	Protein virilizer homolog			n[305]GPLPPLRPLS[167]STGYRPSPR	Color2 [DarkGray]	1	4		5.10171e+06	-2.81416	-1.5098	-2.96416	-1.66914	-2.42702	-1.92511
+	2.0269	1.03374	sp|Q96DT7|ZBT10_HUMAN	ZBTB10	Zinc finger and BTB domain-containing protein 10			n[305]GGGGGGLGNNGS[167]SR	Color2 [DarkGray]	1	4		3.00431e+06	-0.72866	0.502259	-0.491551	-0.0190506	-0.736991	0.660803
+	1.42564	1.03343	sp|P09651|ROA1_HUMAN	HNRNPA1	Heterogeneous nuclear ribonucleoprotein A1			n[305]NQGGYGGSSSSSS[167]YGSGR	Color2 [DarkGray]	1	4		36840820	-0.102521	0.103189	-1.08032	0.408496	-1.07215	0.333602
+	2.78817	1.0333	sp|O43399|TPD54_HUMAN	TPD52L2	Tumor protein D54			n[305]TSAALSTVGS[167]AISRK	Color2 [DarkGray]	1	4		24665662	-0.613668	0.374346	-0.485096	0.239169	-0.823453	0.564172
+	3.12771	1.03301	sp|O60716|CTND1_HUMAN	CTNND1	Catenin delta-1			n[305]VGGS[167]SVDLHR	Color2 [DarkGray]	1	4		11311900	1.45492	2.39323	1.39061	2.24168	1.26392	2.57356
+	2.57447	1.03297	sp|Q96Q45|TM237_HUMAN	TMEM237	Transmembrane protein 237			n[305]S[167]SSSSLLR	Color2 [DarkGray]	1	4		15991545	-0.524928	0.740329	-0.427746	0.728163	-0.0249882	0.652762
+	1.93099	1.03297	sp|P06748|NPM_HUMAN	NPM1	Nucleophosmin			n[305]TVS[167]LGAGAK	Color2 [DarkGray]	1	4		2458042	-1.92127	-0.237276	-1.37378	-0.735558	-1.37818	-0.601488
+	3.82734	1.03296	sp|Q9C0B5|ZDHC5_HUMAN	ZDHHC5	Palmitoyltransferase ZDHHC5			n[305]S[167]FHFDPLS[167]SGSR	Color2 [DarkGray]	1	4		7.8546e+06	-2.26585	-1.18153	-2.26177	-1.08816	-2.13725	-1.2963
+	3.74112	1.03242	sp|Q96H79|ZCCHL_HUMAN	ZC3HAV1L	Zinc finger CCCH-type antiviral protein 1-like			n[305]RS[167]HQLIHAASLK	Color2 [DarkGray]	1	4		1.39921e+06	-2.02748	-1.01868	-1.96097	-0.827729	-2.02682	-1.07159
+	2.74899	1.03219	sp|Q96I34|PP16A_HUMAN	PPP1R16A	Protein phosphatase 1 regulatory subunit 16A			n[305]QRS[167]LLRR	Color2 [DarkGray]	1	4		5.93763e+06	-0.157733	1.10754	0.288237	1.00128	0.0690098	1.18725
+	1.24096	1.03112	sp|Q9NQW6|ANLN_HUMAN	ANLN	Anillin			n[305]LANLAATICSWEDDVNHS[167]FAK	Color2 [DarkGray]	1	4		0	-2.31767	-1.16411	-1.91261	-0.556254	-1.16927	-0.585814
+	4.15191	1.03068	sp|Q5TEC3|ZN697_HUMAN	ZNF697	Zinc finger protein 697			n[305]HLS[167]LGSR	Color2 [DarkGray]	1	4		3853603	-1.64151	-0.508173	-1.4915	-0.540411	-1.46291	-0.455293
+	2.42638	1.03065	sp|Q8N684|CPSF7_HUMAN	CPSF7	Cleavage and polyadenylation specificity factor subunit 7			n[305]SYSVGASGS[167]SSRK	Color2 [DarkGray]	1	4		23631386	0.718604	1.8329	0.660226	1.37016	0.642105	1.90983
+	2.89919	1.03036	sp|O94964|SOGA1_HUMAN	SOGA1	Protein SOGA1			n[305]QVLQTELERPREHS[167]LKK	Color2 [DarkGray]	1	4		59632616	1.57993	2.50986	1.64788	2.43586	1.41054	2.78369
+	2.06003	1.02995	sp|P42167|LAP2B_HUMAN	TMPO	Lamina-associated polypeptide 2, isoforms beta/gamma			n[305]MEESFSS[167]K	Color2 [DarkGray]	1	4		10313704	0.272108	1.41191	0.509407	1.06344	0.373087	1.7691
+	2.17426	1.0299	sp|Q96PD2|DCBD2_HUMAN	DCBLD2	Discoidin, CUB and LCCL domain-containing protein 2			n[305]S[167]TFKPEEGK	Color2 [DarkGray]	1	4		33571740	1.7309	2.98004	2.36202	2.9767	1.99028	3.21614
+	1.45114	1.02962	sp|Q9H6A9|PCX3_HUMAN	PCNX3	Pecanex-like protein 3			n[305]DLALLRPS[167]K	Color2 [DarkGray]	1	4		2973161	-0.993669	0.534311	-0.416111	0.193142	-0.0836868	0.867936
+	2.16498	1.0292	sp|Q14315|FLNC_HUMAN	FLNC	Filamin-C			n[305]SS[167]HTYTR	Color2 [DarkGray]	1	4		2.23753e+06	0.131947	0.973687	-0.198973	0.617479	-0.284676	1.14472
+	1.8529	1.02891	sp|Q96EY5|MB12A_HUMAN	MVB12A	Multivesicular body subunit 12A			n[305]RNDSIYEASSLY[243]GISAMDGVPFTLHPR	Color2 [DarkGray]	1	4		42884628	1.46348	2.4456	1.37864	1.9944	1.35166	2.8405
+	2.94181	1.02856	sp|Q9BSJ6|PIMRE_HUMAN	PIMREG	Protein PIMREG			n[305]WQNMGT[181]SVR	Color2 [DarkGray]	1	4		9321054	1.3927	2.6433	1.69521	2.48006	1.6836	2.73383
+	2.35815	1.02818	sp|Q9BX10|GTPB2_HUMAN	GTPBP2	GTP-binding protein 2			n[305]VSELFGGCCRPGGGPAVGGT[181]LK	Color2 [DarkGray]	1	4		878965	-2.81728	-1.65603	-2.65508	-2.05494	-2.80662	-1.48346
+	1.48901	1.02816	sp|Q96EY5|MB12A_HUMAN	MVB12A	Multivesicular body subunit 12A			n[305]T[181]ASRLGSR	Color2 [DarkGray]	1	4		32516164	1.08449	1.62659	1.11758	1.73368	0.385213	2.3115
+	2.49583	1.02766	sp|Q9Y519|T184B_HUMAN	TMEM184B	Transmembrane protein 184B			n[305]GGAHGLS[167]R	Color2 [DarkGray]	1	4		39893404	0.291061	1.65982	0.745011	1.40793	0.368703	1.42001
+	1.62983	1.02674	sp|Q9HCS5|E41LA_HUMAN	EPB41L4A	Band 4.1-like protein 4A			n[305]NQADPNNRRS[167]R	Color2 [DarkGray]	1	4		1.00031e+06	-2.3774	-1.21948	-1.77605	-1.41807	-2.23491	-0.670603
+	5.05294	1.02638	sp|Q9UHV9|PFD2_HUMAN	PFDN2	Prefoldin subunit 2			n[305]GAVS[167]AEQVIAGFNR	Color2 [DarkGray]	1	4		640374	-4.19867	-3.18501	-4.25145	-3.26895	-4.28464	-3.20166
+	1.38915	1.02632	sp|Q7Z5L9|I2BP2_HUMAN	IRF2BP2	Interferon regulatory factor 2-binding protein 2			n[305]RPAS[167]VSSSAAVEHEQREAAAK	Color2 [DarkGray]	1	4		2.99696e+06	-1.32636	-0.962277	-1.37474	-0.540339	-1.7536	0.126866
+	3.05114	1.02625	sp|Q8IWW6|RHG12_HUMAN	ARHGAP12	Rho GTPase-activating protein 12			n[305]RPT[181]LQAVR	Color2 [DarkGray]	1	4		12639353	0.651839	1.61277	0.626837	1.50494	0.65213	1.89184
+	2.08517	1.02589	sp|Q9HB14|KCNKD_HUMAN	KCNK13	Potassium channel subfamily K member 13			n[305]AS[167]LAILQK	Color2 [DarkGray]	1	4		3.75236e+06	-0.870465	0.112596	-1.09727	-0.312964	-0.938378	0.371929
+	2.44597	1.02538	sp|Q9NWQ8|PHAG1_HUMAN	PAG1	Phosphoprotein associated with glycosphingolipid-enriched microdomains 1			n[305]RFSS[167]LSYK	Color2 [DarkGray]	1	4		17282762	0.665236	1.7348	0.792011	1.40263	0.48411	1.88007
+	1.75008	1.02502	sp|Q09666|AHNK_HUMAN	AHNAK	Neuroblast differentiation-associated protein AHNAK			n[305]LQGSGVSLAS[167]KK	Color2 [DarkGray]	1	4		8876069	-0.661334	0.663673	-0.542096	0.0287552	-0.338508	0.840707
+	1.38561	1.02452	sp|P62633|CNBP_HUMAN	CNBP	Cellular nucleic acid-binding protein			n[305]CGRS[167]GHWAR	Color2 [DarkGray]	1	4		4.80007e+06	-0.334491	0.68286	-0.0120177	0.502451	0.0166445	1.55837
+	1.86005	1.02418	sp|Q9UIG0|BAZ1B_HUMAN	BAZ1B	Tyrosine-protein kinase BAZ1B			n[305]NTGSPDRKPS[167]KK	Color2 [DarkGray]	1	4		3.82084e+06	0.0568256	1.43198	0.380471	0.947258	0.506337	1.63694
+	2.32238	1.02315	sp|P53814|SMTN_HUMAN	SMTN	Smoothelin			n[305]GNTATETTTRHS[167]QR	Color2 [DarkGray]	1	4		8091186	-2.27584	-1.32976	-2.4844	-1.71403	-2.74341	-1.39042
+	3.23506	1.02273	sp|O75369|FLNB_HUMAN	FLNB	Filamin-B			n[305]EVGEHLVS[167]IKK	Color2 [DarkGray]	1	4		5080151	-0.503919	0.449944	-0.582777	0.32601	-0.535425	0.670129
+	1.96415	1.02252	sp|Q9UDY2|ZO2_HUMAN	TJP2	Tight junction protein ZO-2			n[305]RGYY[243]GQSAR	Color2 [DarkGray]	1	4		7.40491e+06	0.823936	2.10051	1.22922	1.69328	1.03681	2.36375
+	2.57949	1.02248	sp|Q9H7D0|DOCK5_HUMAN	DOCK5	Dedicator of cytokinesis protein 5			n[305]RLS[167]ITSVTSSVVSTSSNSSDNAPSRPGSDGSILEPLLER	Color2 [DarkGray]	1	4		0	-1.6743	-0.856791	-2.03281	-0.982888	-1.80224	-0.602224
+	1.79331	1.02221	sp|P09651|ROA1_HUMAN	HNRNPA1	Heterogeneous nuclear ribonucleoprotein A1			n[305]NQGGY[243]GGS[167]SSSSSYGSGRRF	Color2 [DarkGray]	1	4		6028656	-0.503124	0.830556	-0.358629	0.0737829	-0.474313	0.826222
+	2.84951	1.02179	sp|Q9BY89|K1671_HUMAN	KIAA1671	Uncharacterized protein KIAA1671			n[305]KQPPS[167]SRLSSLS[167]SQTEPTSAGDQYDCSR	Color2 [DarkGray]	1	4		2308069	-1.51401	-0.516364	-1.49334	-0.586285	-1.35652	-0.195851
+	1.99237	1.02167	sp|Q14152|EIF3A_HUMAN	EIF3A	Eukaryotic translation initiation factor 3 subunit A			n[305]RGPAEESSSWRDS[167]SR	Color2 [DarkGray]	1	4		1.87951e+06	-1.70589	-1.04622	-1.89828	-1.1051	-2.13297	-0.520822
+	1.34249	1.02144	sp|O43491|E41L2_HUMAN	EPB41L2	Band 4.1-like protein 2			n[305]QAS[167]TLIDRPAPHFER	Color2 [DarkGray]	1	4		2.34419e+06	-2.75411	-1.29941	-1.62018	-1.41524	-2.47563	-1.07095
+	3.40528	1.02138	sp|P02751|FINC_HUMAN	FN1	Fibronectin			n[305]TNTNVNCPIECFMPLDVQADREDS[167]RE	Color2 [DarkGray]	1	4		5.83096e+06	-0.449697	0.429955	-0.578969	0.444949	-0.766408	0.394156
+	3.36846	1.02077	sp|P29966|MARCS_HUMAN	MARCKS	Myristoylated alanine-rich C-kinase substrate			n[305]S[167]FKLS[167]GFSFK	Color2 [DarkGray]	1	4		0	0.207287	1.26356	0.416426	1.37674	0.431686	1.47742
+	2.41633	1.02058	sp|Q9NQS3|NECT3_HUMAN	NECTIN3	Nectin-3			n[305]ESQIDVLQQDELDSYPDS[167]VKK	Color2 [DarkGray]	1	4		6402452	-0.37471	0.485079	-0.478829	0.265929	-0.755592	0.701614
+	1.5063	1.02049	sp|P04049|RAF1_HUMAN	RAF1	RAF proto-oncogene serine/threonine-protein kinase			n[305]RMRES[167]VSR	Color2 [DarkGray]	1	4		3.08569e+06	-1.80239	-0.0267305	-0.959369	-0.413778	-0.897023	-0.1568
+	1.8832	1.02013	sp|Q9UM00|TMCO1_HUMAN	TMCO1	Calcium load-activated calcium channel			n[305]KKET[181]ITESAGR	Color2 [DarkGray]	1	4		3.5567e+06	-1.29918	-0.260969	-1.29943	-0.763837	-1.44616	0.0404291
+	2.11056	1.01901	sp|Q9NQG1|MANBL_HUMAN	MANBAL	Protein MANBAL			n[305]AAVPS[167]VNK	Color2 [DarkGray]	1	4		9778193	-0.889845	0.479933	-0.402975	0.0544691	-0.710635	0.519186
+	1.42515	1.01879	sp|O00571|DDX3X_HUMAN	DDX3X	ATP-dependent RNA helicase DDX3X			n[305]QSSGASSSSFSS[167]SRASS[167]SR	Color2 [DarkGray]	1	4		2.97511e+06	-1.11248	-0.113852	-1.21195	-0.829478	-1.40991	0.265368
+	2.52916	1.01878	sp|Q8N8S7|ENAH_HUMAN	ENAH	Protein enabled homolog			n[305]AS[167]STSTPEPTRKPWER	Color2 [DarkGray]	1	4		4775452	-0.325023	0.737484	0.129067	1.02556	-0.155166	0.942171
+	3.09181	1.01877	sp|Q13017|RHG05_HUMAN	ARHGAP5	Rho GTPase-activating protein 5			n[305]LYHDS[167]TNIDK	Color2 [DarkGray]	1	4		73749472	2.26206	3.52194	2.611	3.37385	2.37622	3.40981
+	2.05204	1.0187	sp|Q9UFW8|CGBP1_HUMAN	CGGBP1	CGG triplet repeat-binding protein 1			n[305]NGGS[167]IPK	Color2 [DarkGray]	1	4		1997404	-1.08259	-0.0835104	-1.10258	-0.453346	-1.12162	0.286163
+	2.88007	1.01823	sp|O75920|SERF1_HUMAN	SERF1A	Small EDRK-rich factor 1			n[305]EDSLTAS[167]QRK	Color2 [DarkGray]	1	4		1312927	-1.83924	-0.61558	-1.46652	-0.776121	-1.69425	-0.55362
+	1.61876	1.01818	sp|Q9NS91|RAD18_HUMAN	RAD18	E3 ubiquitin-protein ligase RAD18			n[305]VY[243]TPVASRQSLK	Color2 [DarkGray]	1	4		35986220	-0.946918	0.568267	-0.224196	0.220432	-0.284985	0.809732
+	4.46144	1.01811	sp|Q8ND56|LS14A_HUMAN	LSM14A	Protein LSM14 homolog A			n[305]TQLS[167]QGRS[167]SPQLDPLRK	Color2 [DarkGray]	1	4		319890400	4.6283	5.70784	4.66853	5.58872	4.55316	5.60777
+	1.88267	1.01789	sp|O43597|SPY2_HUMAN	SPRY2	Protein sprouty homolog 2			n[305]NSNT[181]VCCK	Color2 [DarkGray]	1	4		16672869	-0.364882	0.714994	-0.023953	0.541934	-0.144739	1.26317
+	1.80092	1.01778	sp|Q96IZ0|PAWR_HUMAN	PAWR	PRKC apoptosis WT1 regulator protein			n[305]S[167]TTSVSEEDVSSR	Color2 [DarkGray]	1	4		65486536	0.405586	2.07808	1.09276	1.55261	0.866686	1.78769
+	2.64163	1.01757	sp|P53814|SMTN_HUMAN	SMTN	Smoothelin			n[305]AGS[167]VRDR	Color2 [DarkGray]	1	4		318617408	0.922112	1.94226	1.18163	1.84755	0.789825	2.15647
+	3.38079	1.0172	sp|Q99698|LYST_HUMAN	LYST	Lysosomal-trafficking regulator			n[305]ITHRYS[167]VR	Color2 [DarkGray]	1	4		6409441	-0.062335	1.03746	-0.0771222	0.7433	-0.151369	0.980015
+	2.87661	1.01718	sp|Q13247|SRSF6_HUMAN	SRSF6	Serine/arginine-rich splicing factor 6			n[305]SGGGGY[243]SSRR	Color2 [DarkGray]	1	4		5.02126e+06	-1.55056	-0.72844	-1.82952	-0.830059	-1.72976	-0.499813
+	3.32866	1.01668	sp|Q8N6H7|ARFG2_HUMAN	ARFGAP2	ADP-ribosylation factor GTPase-activating protein 2			n[305]EVESRSS[167]GLESSEAR	Color2 [DarkGray]	1	4		16919902	0.0267487	0.888454	-0.0397687	0.960498	-0.284217	0.903865
+	2.32536	1.01652	sp|P50402|EMD_HUMAN	EMD	Emerin			n[305]DS[167]AYQSITHYRPVSASR	Color2 [DarkGray]	1	4		15578446	0.601194	1.77316	0.878072	1.45828	0.712235	2.00964
+	3.59593	1.01575	sp|O60341|KDM1A_HUMAN	KDM1A	Lysine-specific histone demethylase 1A			n[305]EPPRASPPGGLAEPPGS[167]AGPQAGPTVVPGSATPM[147]ETGIAETPEGR	Color2 [DarkGray]	1	4		3488349	-2.63349	-1.71094	-2.65143	-1.57902	-2.823	-1.77071
+	2.48456	1.01503	sp|Q13492|PICAL_HUMAN	PICALM	Phosphatidylinositol-binding clathrin assembly protein			n[305]AT[181]TLSNAVSSLASTGLSLTK	Color2 [DarkGray]	1	4		3.64497e+06	-0.526499	0.540663	-0.503414	0.154503	-0.648812	0.671188
+	2.51386	1.01477	sp|Q92597|NDRG1_HUMAN	NDRG1	Protein NDRG1			n[305]S[167]HT[181]SEGTRSR	Color2 [DarkGray]	1	4		2.25932e+06	-2.48172	-1.4134	-2.76777	-1.87029	-2.62873	-1.55023
+	2.01369	1.01458	sp|Q12802|AKP13_HUMAN	AKAP13	A-kinase anchor protein 13			n[305]S[167]AVLLVDETATTPIFANRR	Color2 [DarkGray]	1	4		3.87577e+06	-0.928725	0.105742	-0.77176	-0.212836	-1.42298	0.0273628
+	2.14166	1.01436	sp|Q15464|SHB_HUMAN	SHB	SH2 domain-containing adapter protein B			n[305]ERDFEDPYNGPGS[167]SLRK	Color2 [DarkGray]	1	4		8781222	0.0431375	1.10942	0.3321	0.854811	-0.0119104	1.44217
+	2.41808	1.01415	sp|Q9BY77|PDIP3_HUMAN	POLDIP3	Polymerase delta-interacting protein 3			n[305]LSDSPS[167]MKK	Color2 [DarkGray]	1	4		4.53074e+06	-0.0363112	1.12482	-0.0781112	0.619344	-0.0631189	1.12076
+	2.54402	1.0139	sp|Q9BZI7|REN3B_HUMAN	UPF3B	Regulator of nonsense transcripts 3B			n[305]RSDS[167]ELK	Color2 [DarkGray]	1	4		12839327	-0.665132	0.242887	-0.637472	0.12788	-1.09855	0.269783
+	3.73166	1.01384	sp|O00712|NFIB_HUMAN	NFIB	Nuclear factor 1 B-type			n[305]S[167]LSSPPSSK	Color2 [DarkGray]	1	4		13101121	-0.313421	0.885199	-0.143673	0.717241	-0.269835	0.712147
+	1.98004	1.01327	sp|O15226|NKRF_HUMAN	NKRF	NF-kappa-B-repressing factor			n[305]RHLS[167]TCDGQNPPKK	Color2 [DarkGray]	1	4		17034768	-0.0223598	0.859436	0.169279	0.719142	-0.312551	1.29559
+	2.8053	1.0127	sp|Q8N3V7|SYNPO_HUMAN	SYNPO	Synaptopodin			n[305]GALPPSPALPRPSRSSPGLY[243]TSPGQDSLQPTAVSPPYGGDISPVSPSR	Color2 [DarkGray]	1	4		5972241	-1.91714	-0.978667	-1.99149	-0.694387	-1.94346	-1.14095
+	1.85829	1.01268	sp|Q14118|DAG1_HUMAN	DAG1	Dystroglycan			n[305]LTLEDQAT[181]FIKK	Color2 [DarkGray]	1	4		4074916	-1.36051	-0.512722	-1.28331	-0.756306	-1.83968	-0.176432
+	2.01559	1.0126	sp|Q9GZY8|MFF_HUMAN	MFF	Mitochondrial fission factor			n[305]GILSLIQS[167]STRR	Color2 [DarkGray]	1	4		1.68176e+06	-2.28398	-0.975786	-2.13015	-1.46777	-1.91352	-0.846292
+	2.45609	1.01253	sp|O14950|ML12B_HUMAN	MYL12B	Myosin regulatory light chain 12B	MYL12A, MYL9	sp|P19105|ML12A_HUMAN, sp|P24844|MYL9_HUMAN	n[305]KRPQRAT[181]SNVFAM[147]FDQSQIQEFK	Color2 [DarkGray]	1	4		2.27099e+06	-1.11251	-0.0636425	-0.992361	-0.135261	-0.816517	0.315096
+	1.23444	1.0123	sp|Q6UN15|FIP1_HUMAN	FIP1L1	Pre-mRNA 3'-end-processing factor FIP1			n[305]ERERDHS[167]PT[181]PSVFNSDEER	Color2 [DarkGray]	1	4		9157985	-1.24784	-0.911073	-2.45712	-1.16755	-2.22351	-0.812957
+	2.51943	1.01187	sp|Q13586|STIM1_HUMAN	STIM1	Stromal interaction molecule 1			n[305]ALQAS[167]RNTR	Color2 [DarkGray]	1	4		2.06202e+06	-0.510775	0.467827	-0.351546	0.312656	-0.609215	0.783588
+	1.93322	1.01139	sp|Q9BU76|MMTA2_HUMAN	MMTAG2	Multiple myeloma tumor-associated protein 2			n[305]VES[167]GGPGTSAASAR	Color2 [DarkGray]	1	4		2.92208e+06	-0.578022	0.671884	-0.459368	0.0451794	-0.509344	0.770384
+	1.76799	1.01089	sp|Q96A57|TM230_HUMAN	TMEM230	Transmembrane protein 230			n[305]TNLATGIPS[167]SK	Color2 [DarkGray]	1	4		23309300	-0.543031	0.825412	0.0906901	0.387068	-0.439417	0.928443
+	3.17589	1.01079	sp|O96028|NSD2_HUMAN	NSD2	Histone-lysine N-methyltransferase NSD2			n[305]RDT[181]ITDK	Color2 [DarkGray]	1	4		2.31115e+06	-0.930667	0.139175	-0.978681	-0.152684	-0.956605	0.179933
+	2.37965	1.01075	sp|Q86UE4|LYRIC_HUMAN	MTDH	Protein LYRIC			n[305]T[181]ISTSDPAEVLVK	Color2 [DarkGray]	1	4		13669776	-1.74119	-0.819022	-1.47816	-0.805449	-1.86309	-0.425708
+	2.83557	1.01053	sp|Q8IXJ9|ASXL1_HUMAN	ASXL1	Polycomb group protein ASXL1			n[305]MGS[167]LHGLGK	Color2 [DarkGray]	1	4		2.48086e+06	-0.84656	0.136855	-1.0128	-0.170515	-0.984854	0.221038
+	1.93437	1.01039	sp|Q99755|PI51A_HUMAN	PIP5K1A	Phosphatidylinositol 4-phosphate 5-kinase type-1 alpha	PIPSL	sp|A2A3N6|PIPSL_HUMAN	n[305]KIPLKPSPS[167]K	Color2 [DarkGray]	1	4		7.34706e+06	0.275582	1.68062	1.06814	1.66888	0.631474	1.65687
+	1.61147	1.0094	sp|Q9NPF0|CD320_HUMAN	CD320	CD320 antigen			n[305]T[181]SGLCVPLTWR	Color2 [DarkGray]	1	4		6730392	-3.98695	-2.51268	-3.84919	-2.90692	-3.15523	-2.54357
+	2.12256	1.00934	sp|Q9Y3A3|PHOCN_HUMAN	MOB4	MOB-like protein phocein			n[305]YFPS[167]RVSIK	Color2 [DarkGray]	1	4		11447916	-1.22	0.189218	-0.766487	-0.304312	-1.04532	0.111322
+	3.63446	1.00888	sp|O60563|CCNT1_HUMAN	CCNT1	Cyclin-T1			n[305]T[181]YSLSSSFSSSSSTRK	Color2 [DarkGray]	1	4		4376515	-0.712725	0.459868	-0.470793	0.410286	-0.490739	0.482228
+	2.79398	1.00885	sp|Q8IXS8|F126B_HUMAN	FAM126B	Protein FAM126B			n[305]T[181]AITTASIRR	Color2 [DarkGray]	1	4		13036177	-0.224628	0.867661	0.0324483	0.71169	-0.174565	1.08045
+	3.23253	1.00859	sp|O14974|MYPT1_HUMAN	PPP1R12A	Protein phosphatase 1 regulatory subunit 12A			n[305]S[167]TGVSFWTQDSDENEQEQQS[167]DTEEGSNKK	Color2 [DarkGray]	1	4		3.5557e+06	-0.35924	0.789146	-0.479992	0.623467	-0.247281	0.526636
+	1.89548	1.0083	sp|Q969E2|SCAM4_HUMAN	SCAMP4	Secretory carrier-associated membrane protein 4			n[305]AQTEWNT[181]GTWR	Color2 [DarkGray]	1	4		9404529	0.0733013	1.29327	0.412405	1.01756	0.494275	1.69405
+	1.54247	1.00823	sp|O14523|C2C2L_HUMAN	C2CD2L	Phospholipid transfer protein C2CD2L			n[305]VSFLRS[167]GTK	Color2 [DarkGray]	1	4		2.28635e+06	-0.673298	0.240622	-0.122215	0.420878	-0.49103	1.07663
+	3.62911	1.00817	sp|P53814|SMTN_HUMAN	SMTN	Smoothelin			n[305]SLS[167]VLSPR	Color2 [DarkGray]	1	4		58169116	0.0500898	1.07375	0.00686503	0.863202	-0.111797	1.03272
+	3.38588	1.0081	sp|O60732|MAGC1_HUMAN	MAGEC1	Melanoma-associated antigen C1			n[305]SFSS[167]TLLSIFQSSPER	Color2 [DarkGray]	1	4		80242480	-1.02157	0.245873	-0.797061	0.0924377	-0.811481	0.0558634
+	4.30962	1.00787	sp|Q14674|ESPL1_HUMAN	ESPL1	Separin			n[305]TPAPGPEAASGEWELLRLDS[167]SKK	Color2 [DarkGray]	1	4		2.40832e+06	0.286342	1.36287	0.226985	1.19679	0.311237	1.2885
+	3.27786	1.00748	sp|Q9NYB9|ABI2_HUMAN	ABI2	Abl interactor 2			n[305]TAS[167]VNQR	Color2 [DarkGray]	1	4		99084848	3.61346	4.69524	3.74043	4.54497	3.43771	4.57383
+	2.06527	1.00731	sp|Q9BXB4|OSB11_HUMAN	OSBPL11	Oxysterol-binding protein-related protein 11			n[305]NSSCGGGISSSSS[167]SRGGSAK	Color2 [DarkGray]	1	4		1.34498e+06	-1.93934	-0.505747	-1.338	-0.881479	-1.71355	-0.581739
+	1.35287	1.00722	sp|P06748|NPM_HUMAN	NPM1	Nucleophosmin			n[305]KS[167]IRDTPAK	Color2 [DarkGray]	1	4		1195599	-2.19393	-0.621797	-1.2501	-1.08856	-1.6412	-0.353233
+	2.22295	1.00719	sp|P78344|IF4G2_HUMAN	EIF4G2	Eukaryotic translation initiation factor 4 gamma 2	OSMR	sp|Q99650|OSMR_HUMAN	n[305]S[167]SILSLIK	Color2 [DarkGray]	1	4		0	1.18284	2.22978	1.38758	1.956	1.15207	2.55827
+	2.28426	1.00695	sp|Q9NR81|ARHG3_HUMAN	ARHGEF3	Rho guanine nucleotide exchange factor 3			n[305]NAAPSS[167]TK	Color2 [DarkGray]	1	4		3.60862e+06	-0.366242	0.698598	-0.267641	0.336504	-0.405245	0.946629
+	2.50937	1.0067	sp|O95081|AGFG2_HUMAN	AGFG2	Arf-GAP domain and FG repeat-containing protein 2			n[305]STQPPPHSS[167]VK	Color2 [DarkGray]	1	4		5960315	-1.53011	-0.803926	-1.91561	-0.924592	-1.98329	-0.680389
+	2.65225	1.00608	sp|P29084|T2EB_HUMAN	GTF2E2	Transcription initiation factor IIE subunit beta			n[305]RALS[167]TPVVEK	Color2 [DarkGray]	1	4		14754513	1.06019	2.35685	1.49337	2.12843	1.20324	2.28976
+	2.35083	1.00602	sp|Q08209|PP2BA_HUMAN	PPP3CA	Serine/threonine-protein phosphatase 2B catalytic subunit alpha isoform	PPP3CB	sp|P16298|PP2BB_HUMAN	n[305]VFS[167]VLREESESVLTLK	Color2 [DarkGray]	1	4		0	0.130424	1.01375	0.176464	1.2724	-0.202758	0.836039
+	2.82266	1.00598	sp|Q9BXB5|OSB10_HUMAN	OSBPL10	Oxysterol-binding protein-related protein 10			n[305]AVQGTDGGGGSNS[167]SSR	Color2 [DarkGray]	1	4		3452081	-1.53189	-0.231956	-1.41381	-0.449538	-1.15199	-0.398247
+	2.45981	1.00585	sp|P37275|ZEB1_HUMAN	ZEB1	Zinc finger E-box-binding homeobox 1			n[305]IENKPLQEQLS[167]VNQIK	Color2 [DarkGray]	1	4		7466724	-0.321565	0.598694	-0.650255	0.777514	-0.286739	0.382798
+	1.94706	1.00572	sp|Q13148|TADBP_HUMAN	TARDBP	TAR DNA-binding protein 43			n[305]HNS[167]NRQLER	Color2 [DarkGray]	1	4		8.22608e+06	-0.43893	0.308927	-0.61442	0.0636129	-0.906961	0.684296
+	3.25893	1.00524	sp|Q9NQW6|ANLN_HUMAN	ANLN	Anillin			n[305]LANLAAT[181]ICSWEDDVNHSFAK	Color2 [DarkGray]	1	4		0	0.38921	1.20196	0.207072	1.18334	0.201666	1.42837
+	2.68515	1.00497	sp|Q9BWG6|SCNM1_HUMAN	SCNM1	Sodium channel modifier 1			n[305]APHY[243]NSCCR	Color2 [DarkGray]	1	4		6.02827e+06	-1.23192	-0.264239	-1.5493	-0.564245	-1.30517	-0.242998
+	2.19083	1.00431	sp|Q8IVW8|SPNS2_HUMAN	SPNS2	Protein spinster homolog 2			n[305]GAGGS[167]GCCGAR	Color2 [DarkGray]	1	4		2059148	-1.56411	-0.491301	-1.98844	-0.985574	-1.6542	-0.716944
+	2.08774	1.00405	sp|Q8IY63|AMOL1_HUMAN	AMOTL1	Angiomotin-like protein 1			n[305]ANS[167]GQAHKDEALK	Color2 [DarkGray]	1	4		14229876	-0.115782	0.807343	0.371957	1.11862	-0.152177	1.1902
+	3.52899	1.00363	sp|O95466|FMNL1_HUMAN	FMNL1	Formin-like protein 1			n[305]LTPAHS[167]R	Color2 [DarkGray]	1	4		6977572	-0.21961	0.959171	-0.0803332	0.721486	-0.231028	0.799261
+	2.72311	1.00351	sp|Q5VT25|MRCKA_HUMAN	CDC42BPA	Serine/threonine-protein kinase MRCK alpha			n[305]SSAQNGS[167]ALK	Color2 [DarkGray]	1	4		4.56268e+06	-0.444516	0.657701	-0.208203	0.736129	-0.0489683	0.915026
+	2.68293	1.00334	sp|Q8IVF2|AHNK2_HUMAN	AHNAK2	Protein AHNAK2			n[305]LPS[167]FRWS[167]PK	Color2 [DarkGray]	1	4		5041550	-0.216976	1.13486	-0.0523782	0.688354	-0.043458	0.873993
+	2.60917	1.00255	sp|Q9UJM3|ERRFI_HUMAN	ERRFI1	ERBB receptor feedback inhibitor 1			n[305]RS[167]HSGPAGS[167]FNKPAIR	Color2 [DarkGray]	1	4		6.6098e+06	-0.0809631	0.780911	-0.114021	0.785463	-0.0266781	1.21962
+	2.29753	1.00245	sp|Q6XZF7|DNMBP_HUMAN	DNMBP	Dynamin-binding protein			n[305]SNRVS[167]SHLK	Color2 [DarkGray]	1	4		22960270	0.962866	1.83432	0.547021	1.45974	0.579555	1.80275
+	1.5333	1.00235	sp|Q09666|AHNK_HUMAN	AHNAK	Neuroblast differentiation-associated protein AHNAK			n[305]GGADVSGGVSAPDISLGEGHLS[167]VKGS[167]GGEWK	Color2 [DarkGray]	1	4		1.60139e+06	-0.95749	0.396577	-0.73577	0.00280094	-0.207582	0.706835
+	1.28798	1.00215	sp|Q92882|OSTF1_HUMAN	OSTF1	Osteoclast-stimulating factor 1			n[305]QGT[181]DAVRTLSNAEDYLDDEDS[167]D	Color2 [DarkGray]	1	4		2.03609e+06	0.19759	0.479869	-0.113267	1.44899	0.365115	1.52702
+	1.9307	1.00199	sp|P08397|HEM3_HUMAN	HMBS	Porphobilinogen deaminase			n[305]SVVGTSS[167]LRR	Color2 [DarkGray]	1	4		16410535	-0.480958	0.613479	-0.113561	0.391277	-0.331436	1.07526
+	3.16105	1.00172	sp|Q96AC1|FERM2_HUMAN	FERMT2	Fermitin family homolog 2			n[305]KLDDQSEDEALELEGPLITPGSGS[167]IYSSPGLYSK	Color2 [DarkGray]	1	4		11208853	0.484963	1.27075	0.191715	1.25589	0.291348	1.44653
+	1.98703	1.00131	sp|Q86SQ0|PHLB2_HUMAN	PHLDB2	Pleckstrin homology-like domain family B member 2			n[305]LST[181]GTTVEDVQK	Color2 [DarkGray]	1	4		20376102	-0.723571	0.714416	-0.418872	0.62879	0.00954723	0.52783
+	2.7929	1.00111	sp|Q9NVP1|DDX18_HUMAN	DDX18	ATP-dependent RNA helicase DDX18			n[305]FQGASNLTLSETQNGDVSEET[181]M[147]GSRK	Color2 [DarkGray]	1	4		0	-1.9296	-0.710622	-1.76638	-0.979185	-1.64227	-0.645136
+	2.22044	1.00099	sp|Q86UE4|LYRIC_HUMAN	MTDH	Protein LYRIC			n[305]S[167]WSDRSIFSGIGSTAEPVSQSTTSDYQWDVSR	Color2 [DarkGray]	1	4		4.01008e+06	-1.64603	-0.237875	-1.11642	-0.364779	-1.07769	-0.234531
+	2.79253	1.00094	sp|Q08211|DHX9_HUMAN	DHX9	ATP-dependent RNA helicase A			n[305]Y[243]DNGSGYR	Color2 [DarkGray]	1	4		5287927	-0.478685	0.806341	-0.266096	0.446106	-0.263909	0.741673
+	3.29416	1.00041	sp|O95239|KIF4A_HUMAN	KIF4A	Chromosome-associated kinesin KIF4A			n[305]TFS[167]LTEVR	Color2 [DarkGray]	1	4		121243352	2.99674	4.12266	2.90483	3.98455	3.01043	3.80602
+	2.35293	1.0001	sp|O43709|BUD23_HUMAN	BUD23	Probable 18S rRNA (guanine-N(7))-methyltransferase			n[305]ESVFT[181]NERFPLRMSR	Color2 [DarkGray]	1	4		8264907	-0.256262	0.593252	-0.525555	0.275401	-0.62835	0.72148
+	4.93036	1.00007	sp|Q8N567|ZCHC9_HUMAN	ZCCHC9	Zinc finger CCHC domain-containing protein 9			n[305]KGS[167]FEGTSQNLPK	Color2 [DarkGray]	1	4		6973714	-0.240964	0.836517	-0.178648	0.733535	-0.188852	0.821687
+	2.39086	0.998797	sp|O75533|SF3B1_HUMAN	SF3B1	Splicing factor 3B subunit 1			n[305]VLPPPAGYVPIRT[181]PARK	Color2 [DarkGray]	1	4		26683442	0.602155	1.78599	0.916258	2.01138	1.13546	1.8529
+	2.13509	0.998686	sp|Q96BH1|RNF25_HUMAN	RNF25	E3 ubiquitin-protein ligase RNF25			n[305]GRTPGS[167]SYPR	Color2 [DarkGray]	1	4		1.13069e+06	-1.50692	-0.205831	-1.17218	-0.622998	-1.20935	-0.0635653
+	1.93119	0.99864	sp|Q969E4|TCAL3_HUMAN	TCEAL3	Transcription elongation factor A protein-like 3	TCEAL5, TCEAL6	sp|Q5H9L2|TCAL5_HUMAN, sp|Q6IPX3|TCAL6_HUMAN	n[305]TDRGTDDSPKDS[167]QEDLQER	Color2 [DarkGray]	1	4		18935158	1.73923	3.21801	2.40065	2.90759	2.23969	3.2499
+	3.11242	0.998526	sp|Q09666|AHNK_HUMAN	AHNAK	Neuroblast differentiation-associated protein AHNAK		rev_sp|Q96HP0|DOCK6_HUMAN, rev_sp|Q96N67|DOCK7_HUMAN	n[305]APS[167]LDIK	Color2 [DarkGray]	1	4		12031045	0.497153	1.70337	0.682989	1.56914	0.829094	1.7323
+	2.83715	0.997383	sp|P50749|RASF2_HUMAN	RASSF2	Ras association domain-containing protein 2			n[305]TRS[167]DVGVR	Color2 [DarkGray]	1	4		4.35514e+06	-0.26793	0.811899	-0.0804992	0.643055	-0.147337	1.04143
+	1.5637	0.997106	sp|Q96B01|R51A1_HUMAN	RAD51AP1	RAD51-associated protein 1			n[305]SPNQS[167]LR	Color2 [DarkGray]	1	4		3.10853e+06	-0.388526	0.796144	-0.439374	0.0609779	-0.285446	1.02085
+	2.17101	0.997084	sp|Q9UIW2|PLXA1_HUMAN	PLXNA1	Plexin-A1			n[305]S[167]LSRYESMLR	Color2 [DarkGray]	1	4		2.61475e+06	-1.36371	-0.487191	-1.01514	-0.319248	-1.39397	0.0248718
+	2.32893	0.996975	sp|O95402|MED26_HUMAN	MED26	Mediator of RNA polymerase II transcription subunit 26			n[305]QQS[167]LYAPK	Color2 [DarkGray]	1	4		10208635	1.62747	2.881	1.76771	2.37774	1.43896	2.56633
+	2.63304	0.996627	sp|Q3ZCQ8|TIM50_HUMAN	TIMM50	Mitochondrial import inner membrane translocase subunit TIM50			n[305]RAPDQAAEIGSRGS[167]TK	Color2 [DarkGray]	1	4		9837094	-1.00035	0.231677	-0.664229	0.0875177	-0.629678	0.376431
+	3.02111	0.996526	sp|O00622|CCN1_HUMAN	CCN1	CCN family member 1			n[305]FTYAGCLS[167]VK	Color2 [DarkGray]	1	4		3.95737e+06	-1.33083	-0.234653	-1.55361	-0.488522	-1.32442	-0.496109
+	1.28788	0.996409	sp|Q96TC7|RMD3_HUMAN	RMDN3	Regulator of microtubule dynamics protein 3			n[305]T[181]ATALLESPLSATVEDALQSFLK	Color2 [DarkGray]	1	4		121474	-4.24915	-4.24864	-4.82825	-3.28241	-4.80946	-3.36658
+	1.2598	0.996114	sp|Q9ULH1|ASAP1_HUMAN	ASAP1	Arf-GAP with SH3 domain, ANK repeat and PH domain-containing protein 1			n[305]LSYGAFTNQIFVSTSTDSPTS[167]PTTEAPPLPPR	Color2 [DarkGray]	1	4		15122149	0.0198641	1.47829	0.0766902	0.295474	-0.382864	0.928267
+	2.46151	0.995264	sp|Q9UBC2|EP15R_HUMAN	EPS15L1	Epidermal growth factor receptor substrate 15-like 1			n[305]S[167]TPVSQLGSADFPEAPDPFQPLGADSGDPFQSK	Color2 [DarkGray]	1	4		0	-1.24297	-0.393778	-1.33538	0.0241461	-1.2695	-0.492429
+	2.07306	0.995155	sp|Q92974|ARHG2_HUMAN	ARHGEF2	Rho guanine nucleotide exchange factor 2			n[305]QSLLGS[167]RR	Color2 [DarkGray]	1	4		18215996	0.205519	1.52447	0.423615	0.910732	0.289172	1.46857
+	1.26229	0.995034	sp|P09651|ROA1_HUMAN	HNRNPA1	Heterogeneous nuclear ribonucleoprotein A1			n[305]NQGGY[243]GGS[167]SSSSSYGSGR	Color2 [DarkGray]	1	4		2.00469e+06	-2.75156	-0.981593	-2.31728	-1.96798	-2.02425	-1.15841
+	1.95704	0.994669	sp|Q9BYP7|WNK3_HUMAN	WNK3	Serine/threonine-protein kinase WNK3			n[305]AM[147]S[167]GSFQR	Color2 [DarkGray]	1	4		4.40285e+06	-1.15772	-0.151501	-1.44045	-0.662519	-1.18684	0.0130129
+	1.19955	0.994604	sp|Q9UHB6|LIMA1_HUMAN	LIMA1	LIM domain and actin-binding protein 1			n[305]ISENSYS[167]LDDLEIGPGQLSSSTFDSEK	Color2 [DarkGray]	1	4		0	-1.27681	-0.208602	-0.19259	0.173341	-1.27186	0.277817
+	3.3399	0.993999	sp|Q8N5U6|RNF10_HUMAN	RNF10	RING finger protein 10			n[305]NES[167]FNNQSR	Color2 [DarkGray]	1	4		9847135	0.776991	1.74303	0.868571	1.65577	0.701225	1.92998
+	2.93026	0.993855	sp|Q09666|AHNK_HUMAN	AHNAK	Neuroblast differentiation-associated protein AHNAK			n[305]GPQVS[167]SALNLDTSK	Color2 [DarkGray]	1	4		30547386	0.855303	1.81213	0.791625	1.60916	0.813906	2.02111
+	1.55828	0.993687	sp|Q5M775|CYTSB_HUMAN	SPECC1	Cytospin-B			n[305]HLRTPS[167]TKPK	Color2 [DarkGray]	1	4		7128726	-0.255712	0.802922	0.467741	0.877787	-0.0879917	1.42439
+	1.7869	0.993551	sp|Q13444|ADA15_HUMAN	ADAM15	Disintegrin and metalloproteinase domain-containing protein 15			n[305]GPT[181]CQYR	Color2 [DarkGray]	1	4		5343860	-0.23388	1.10867	0.274202	0.613459	-0.0124731	1.28637
+	3.02682	0.992489	sp|Q09666|AHNK_HUMAN	AHNAK	Neuroblast differentiation-associated protein AHNAK			n[305]ADIKS[167]PSLDVTVPEAELNLETPEISVGGK	Color2 [DarkGray]	1	4		0	2.41038	3.17239	2.38876	3.32215	2.22868	3.51074
+	1.71352	0.99217	sp|Q96HY6|DDRGK_HUMAN	DDRGK1	DDRGK domain-containing protein 1			n[305]DLGS[167]RLQAQR	Color2 [DarkGray]	1	4		9817701	-0.256327	0.776076	0.214183	0.624883	-0.197365	1.33604
+	2.06352	0.991736	sp|Q9H4A6|GOLP3_HUMAN	GOLPH3	Golgi phosphoprotein 3			n[305]RTEAS[167]RNAADK	Color2 [DarkGray]	1	4		1.30716e+06	-0.398985	0.312948	-0.689313	0.16544	-1.0902	0.318323
+	2.25845	0.990227	sp|Q09666|AHNK_HUMAN	AHNAK	Neuroblast differentiation-associated protein AHNAK			n[305]QGFDLNVPGGEIDAS[167]LK	Color2 [DarkGray]	1	4		6.20267e+06	-1.16738	-0.405667	-1.16845	-0.438122	-1.41547	0.0631742
+	1.27306	0.989758	sp|Q5SW79|CE170_HUMAN	CEP170	Centrosomal protein of 170 kDa	CEP170P1	sp|Q96L14|C170L_HUMAN	n[305]T[181]WSRDEVMGDNLLLSSVFQFSK	Color2 [DarkGray]	1	4		0	-0.219451	0.450782	-0.979213	1.01114	-0.147021	0.161663
+	2.75185	0.988776	sp|Q71H61|ILDR2_HUMAN	ILDR2	Immunoglobulin-like domain-containing receptor 2		rev_sp|Q9BT25|HAUS8_HUMAN	n[305]T[181]PGTAPK	Color2 [DarkGray]	1	4		170458208	0.0248785	1.17754	0.374565	1.3815	0.343637	1.15038
+	2.17311	0.988748	sp|Q6DN90|IQEC1_HUMAN	IQSEC1	IQ motif and SEC7 domain-containing protein 1			n[305]RQS[167]AYER	Color2 [DarkGray]	1	4		1.79453e+06	-0.988605	0.221977	-0.501639	0.0234833	-0.756636	0.473906
+	1.89143	0.988742	sp|Q9Y4F3|MARF1_HUMAN	MARF1	Meiosis regulator and mRNA stability factor 1			n[305]LHFQS[167]CHGNVHK	Color2 [DarkGray]	1	4		787364	-1.97165	-0.654398	-1.5744	-0.93214	-1.3969	-0.39019
+	2.5788	0.988517	sp|P05305|EDN1_HUMAN	EDN1	Endothelin-1			n[305]SETM[147]RNS[167]VK	Color2 [DarkGray]	1	4		1.87602e+06	-1.40876	-0.561019	-1.8589	-0.776954	-1.73531	-0.699443
+	1.49071	0.988465	sp|P22413|ENPP1_HUMAN	ENPP1	Ectonucleotide pyrophosphatase/phosphodiesterase family member 1			n[305]DGCAGGGS[167]RGGEGGRAPR	Color2 [DarkGray]	1	4		1.44359e+06	-2.40832	-1.44327	-2.25028	-1.74522	-2.22337	-0.72809
+	2.2828	0.98762	sp|Q92609|TBCD5_HUMAN	TBC1D5	TBC1 domain family member 5			n[305]T[181]LRSTSGK	Color2 [DarkGray]	1	4		4.13597e+06	0.156503	1.64582	0.488008	1.2291	0.534066	1.26651
+	1.44567	0.987307	sp|O00421|CCRL2_HUMAN	CCRL2	C-C chemokine receptor-like 2			n[305]GQS[167]AQGT[181]SREEPDHSTEV	Color2 [DarkGray]	1	4		15565668	-1.32503	-0.432848	-1.68378	-0.829708	-1.11303	0.102635
+	1.42156	0.986666	sp|P84101|SERF2_HUMAN	SERF2	Small EDRK-rich factor 2			n[305]KQSDS[167]VK	Color2 [DarkGray]	1	4		3091358	-0.621318	0.23881	-0.254149	0.0422583	-0.878878	0.924584
+	2.70198	0.986571	sp|Q9Y6K9|NEMO_HUMAN	IKBKG	NF-kappa-B essential modulator			n[305]S[167]SVVGSERK	Color2 [DarkGray]	1	4		5518483	1.12675	2.19141	1.24891	1.96324	1.23841	2.41912
+	1.93027	0.986086	sp|P49841|GSK3B_HUMAN	GSK3B	Glycogen synthase kinase-3 beta			n[305]TTSFAESCKPVQQPSAFGS[167]MK	Color2 [DarkGray]	1	4		2.75196e+06	-0.910068	0.149289	-0.693189	-0.198048	-0.858805	0.544955
+	1.87691	0.986037	sp|O00193|SMAP_HUMAN	SMAP	Small acidic protein			n[305]INEELES[167]QYQQSM[147]DSKLSGR	Color2 [DarkGray]	1	4		2.03744e+06	-0.71556	0.675477	-0.199923	0.603903	0.0469408	0.81019
+	3.73154	0.985666	sp|O00571|DDX3X_HUMAN	DDX3X	ATP-dependent RNA helicase DDX3X			n[305]S[167]SFFSDR	Color2 [DarkGray]	1	4		27108528	1.9059	2.88999	1.80827	2.69945	1.83395	2.91567
+	1.88654	0.985544	sp|Q15417|CNN3_HUMAN	CNN3	Calponin-3			n[305]AGQS[167]VIGLQMGTNK	Color2 [DarkGray]	1	4		7648180	0.529955	1.58351	0.855772	1.28448	0.146366	1.62074
+	1.81139	0.984926	sp|P19174|PLCG1_HUMAN	PLCG1	1-phosphatidylinositol 4,5-bisphosphate phosphodiesterase gamma-1			n[305]ENGDLSPFSGTS[167]LRER	Color2 [DarkGray]	1	4		14935396	0.58301	2.21551	1.18532	1.80562	1.24361	1.94559
+	2.02632	0.98439	sp|P38646|GRP75_HUMAN	HSPA9	Stress-70 protein, mitochondrial			n[305]HQDS[167]WNGLSHEAFR	Color2 [DarkGray]	1	4		5.46794e+06	-2.06617	-0.850798	-2.02187	-1.24496	-1.6531	-0.692209
+	3.78649	0.983244	sp|O14646|CHD1_HUMAN	CHD1	Chromodomain-helicase-DNA-binding protein 1			n[305]QDS[167]RYYSDREK	Color2 [DarkGray]	1	4		1.82899e+06	-0.974333	-0.00645065	-1.14436	-0.143777	-0.985778	-0.00451088
+	2.65091	0.983207	sp|Q8WWI1|LMO7_HUMAN	LMO7	LIM domain only protein 7			n[305]LTSVVTPRPFGS[167]QTR	Color2 [DarkGray]	1	4		60245436	0.35027	1.55912	0.382236	1.16187	0.555568	1.5167
+	4.42952	0.982789	sp|Q5JU85|IQEC2_HUMAN	IQSEC2	IQ motif and SEC7 domain-containing protein 2			n[305]LRSS[167]ASESR	Color2 [DarkGray]	1	4		8618603	0.165528	1.24014	0.181342	1.08043	0.21439	1.18906
+	2.08792	0.982639	sp|P00533|EGFR_HUMAN	EGFR	Epidermal growth factor receptor			n[305]ALM[147]DEEDMDDVVDADEYLIPQQGFFSS[167]PSTSR	Color2 [DarkGray]	1	4		6551084	-0.669131	0.629085	-0.251518	0.728352	0.0159588	0.685791
+	2.78054	0.981981	sp|Q8ND24|RN214_HUMAN	RNF214	RING finger protein 214			n[305]NSPLLSVS[167]SQTITK	Color2 [DarkGray]	1	4		7.34224e+06	-2.28322	-1.08831	-2.16197	-1.42005	-2.07224	-1.06313
+	1.59228	0.981294	sp|O00571|DDX3X_HUMAN	DDX3X	ATP-dependent RNA helicase DDX3X			n[305]S[167]SFFSDRGS[167]GSR	Color2 [DarkGray]	1	4		5.85345e+06	-0.403749	0.786689	-0.256647	0.0549173	-0.498158	0.943721
+	1.93505	0.980591	sp|O00161|SNP23_HUMAN	SNAP23	Synaptosomal-associated protein 23			n[305]AHQITDESLES[167]TRR	Color2 [DarkGray]	1	4		5774834	-1.65636	-0.496058	-1.08884	-0.586549	-1.37601	-0.096837
+	1.85182	0.980252	sp|Q8WUM9|S20A1_HUMAN	SLC20A1	Sodium-dependent phosphate transporter 1			n[305]NNSYTSY[243]TMAICGMPLDSFR	Color2 [DarkGray]	1	4		29022534	0.260276	1.23771	-0.327723	1.0784	0.18772	0.744913
+	2.4482	0.980191	sp|Q9NTJ3|SMC4_HUMAN	SMC4	Structural maintenance of chromosomes protein 4			n[305]GT[181]QPSTAR	Color2 [DarkGray]	1	4		13352562	1.09741	2.17926	1.15059	1.83734	1.20154	2.37353
+	1.93595	0.979981	sp|O94804|STK10_HUMAN	STK10	Serine/threonine-protein kinase 10			n[305]LSEEAECPNPST[181]PSK	Color2 [DarkGray]	1	4		8007777	-0.819688	0.610247	-0.35011	0.648088	-0.108998	0.402812
+	2.27589	0.97975	sp|Q8NCN4|RN169_HUMAN	RNF169	E3 ubiquitin-protein ligase RNF169			n[305]HLEQNGS[167]LK	Color2 [DarkGray]	1	4		41113788	1.76785	3.13086	2.08106	2.68256	2.10194	3.07668
+	2.18408	0.979643	sp|Q86W26|NAL10_HUMAN	NLRP10	NACHT, LRR and PYD domains-containing protein 10			n[305]GIQMNNVS[167]FK	Color2 [DarkGray]	1	4		4.29759e+06	-1.55227	-0.266128	-1.38546	-0.732895	-1.22403	-0.223811
+	2.10839	0.97945	sp|Q09666|AHNK_HUMAN	AHNAK	Neuroblast differentiation-associated protein AHNAK			n[305]LNVGAPDVT[181]LRGPSLQGDLAVSGDIK	Color2 [DarkGray]	1	4		2.15698e+06	-0.249372	0.763131	-0.479069	0.545555	0.0626783	0.9639
+	3.33839	0.979399	sp|O00571|DDX3X_HUMAN	DDX3X	ATP-dependent RNA helicase DDX3X			n[305]FDDRGRS[167]DYDGIGSR	Color2 [DarkGray]	1	4		19122390	1.38683	2.38399	1.34486	2.18296	1.39351	2.49644
+	1.80728	0.97932	sp|Q9H1J1|REN3A_HUMAN	UPF3A	Regulator of nonsense transcripts 3A			n[305]LPPGLT[181]K	Color2 [DarkGray]	1	4		24961222	-0.169398	1.06086	0.522396	0.903622	-0.171656	1.15482
+	1.61067	0.979102	sp|Q9NPR2|SEM4B_HUMAN	SEMA4B	Semaphorin-4B		rev_sp|O60281|ZN292_HUMAN	n[305]VFTES[167]EK	Color2 [DarkGray]	1	4		5604790	-0.815936	0.126616	-0.458615	-0.125936	-1.26999	0.392085
+	3.78851	0.978881	sp|Q9H1I8|ASCC2_HUMAN	ASCC2	Activating signal cointegrator 1 complex subunit 2			n[305]GYRHDS[167]STAVAGSPR	Color2 [DarkGray]	1	4		9867672	-0.956561	0.0402937	-0.955111	-0.128503	-1.10153	0.0116539
+	1.99223	0.978852	sp|P21399|ACOC_HUMAN	ACO1	Cytoplasmic aconitate hydratase			n[305]EFNS[167]YGSR	Color2 [DarkGray]	1	4		5081467	0.221638	1.1808	-0.0961347	0.688559	0.128328	1.32103
+	2.31819	0.978614	sp|Q14011|CIRBP_HUMAN	CIRBP	Cold-inducible RNA-binding protein			n[305]S[167]SGGSYRDSYDSYATHNE	Color2 [DarkGray]	1	4		76442112	0.682845	1.4658	0.591619	1.50344	0.744009	1.98507
+	3.3564	0.978465	sp|Q14498|RBM39_HUMAN	RBM39	RNA-binding protein 39			n[305]MISDRNS[167]RR	Color2 [DarkGray]	1	4		2.38762e+06	-0.943308	0.0897532	-0.745182	-0.0061388	-1.00732	0.155969
+	2.0691	0.978259	sp|Q03405|UPAR_HUMAN	PLAUR	Urokinase plasminogen activator surface receptor			n[305]GRHQS[167]LQCR	Color2 [DarkGray]	1	4		52363012	1.35007	2.54222	1.7537	2.18513	1.42123	2.73243
+	3.77731	0.97807	sp|Q86UE4|LYRIC_HUMAN	MTDH	Protein LYRIC			n[305]SWSDRSIFSGIGS[167]TAEPVSQSTTSDYQWDVSR	Color2 [DarkGray]	1	4		3.23999e+06	-1.34859	-0.332489	-1.44658	-0.32286	-1.28223	-0.487844
+	2.19103	0.978005	sp|P22087|FBRL_HUMAN	FBL	rRNA 2'-O-methyltransferase fibrillarin			n[305]NGGHFVIS[167]IK	Color2 [DarkGray]	1	4		5.51396e+06	-0.808865	-0.0952835	-1.11219	-0.229963	-1.02124	0.31697
+	1.72126	0.977947	sp|Q9HCM3|K1549_HUMAN	KIAA1549	UPF0606 protein KIAA1549			n[305]HKS[167]EIEHHR	Color2 [DarkGray]	1	4		807318	-2.63059	-1.28727	-1.97766	-1.37	-1.94094	-0.958084
+	1.94626	0.977749	sp|Q9NUQ3|TXLNG_HUMAN	TXLNG	Gamma-taxilin			n[305]NLVSPAYCTQESREEIPGGEART[181]DPPDGQQDSECNR	Color2 [DarkGray]	1	4		3.46653e+06	-2.28178	-0.948917	-1.83506	-1.4277	-2.04332	-0.850304
+	2.44193	0.977337	sp|Q9C0C2|TB182_HUMAN	TNKS1BP1	182 kDa tankyrase-1-binding protein			n[305]DLQSEFGITGDPQPSSFSPSSWCQGASQDYGLGGAS[167]PR	Color2 [DarkGray]	1	4		0	0.561859	1.60447	0.565061	1.54569	0.281872	1.19065
+	2.61302	0.976713	sp|O60343|TBCD4_HUMAN	TBC1D4	TBC1 domain family member 4			n[305]SLT[181]SSLENIFSR	Color2 [DarkGray]	1	4		7.42572e+06	-1.9343	-0.779698	-2.10512	-0.99966	-1.68605	-1.01597
+	1.30963	0.976669	sp|Q9H7N4|SFR19_HUMAN	SCAF1	Splicing factor, arginine/serine-rich 19			n[305]IS[167]ETLAGIYDDNSLSQDFPGDESPRPDAQPTQPTPAPGTPPQVDSTR	Color2 [DarkGray]	1	4		9560945	-1.34378	-0.837075	-1.25937	-0.125525	-0.987004	0.302447
+	2.52186	0.976643	sp|P41208|CETN2_HUMAN	CETN2	Centrin-2			n[305]ANM[147]ASSS[167]QR	Color2 [DarkGray]	1	4		1896790	-2.52329	-1.29718	-2.39261	-1.76619	-2.62937	-1.55198
+	2.24077	0.975926	sp|Q9NYF8|BCLF1_HUMAN	BCLAF1	Bcl-2-associated transcription factor 1			n[305]VFLLDRGNT[181]RDK	Color2 [DarkGray]	1	4		10161929	0.331999	1.59088	0.552021	1.11938	0.541	1.64254
+	2.56242	0.975868	sp|Q8TF72|SHRM3_HUMAN	SHROOM3	Protein Shroom3			n[305]S[167]SSFAGGRR	Color2 [DarkGray]	1	4		11803051	-0.72671	0.109933	-0.8127	-0.0757265	-1.10247	0.251513
+	3.25319	0.975834	sp|O75116|ROCK2_HUMAN	ROCK2	Rho-associated protein kinase 2			n[305]S[167]SPRTS[167]MK	Color2 [DarkGray]	1	4		17279380	-1.75173	-0.602134	-1.58708	-0.768878	-1.50911	-0.549404
+	2.05608	0.975318	sp|P33981|TTK_HUMAN	TTK	Dual specificity protein kinase TTK			n[305]QT[181]SRSECR	Color2 [DarkGray]	1	4		1040062	-3.16382	-1.65484	-2.73017	-2.20213	-2.90379	-2.01486
+	2.8234	0.975088	sp|Q9BZL4|PP12C_HUMAN	PPP1R12C	Protein phosphatase 1 regulatory subunit 12C			n[305]T[181]GSSGALGPPERR	Color2 [DarkGray]	1	4		6.16299e+06	-0.287556	0.697538	-0.396066	0.389922	-0.359942	0.794239
+	2.45681	0.975032	sp|Q9UHB7|AFF4_HUMAN	AFF4	AF4/FMR2 family member 4			n[305]RT[181]ISQSS[167]SLK	Color2 [DarkGray]	1	4		22865686	-0.132217	1.14904	0.326058	0.945157	0.187913	1.21265
+	1.57996	0.974824	sp|Q12965|MYO1E_HUMAN	MYO1E	Unconventional myosin-Ie			n[305]NQYVPYPHAPGS[167]QR	Color2 [DarkGray]	1	4		18864904	-0.251994	0.880199	-0.272228	0.468444	0.222902	1.27451
+	2.23039	0.974757	sp|Q9UIG0|BAZ1B_HUMAN	BAZ1B	Tyrosine-protein kinase BAZ1B			n[305]YMTLNPS[167]TK	Color2 [DarkGray]	1	4		2.93647e+06	-1.82064	-0.72369	-1.62991	-1.13477	-1.97156	-0.639375
+	3.92374	0.974617	sp|Q15654|TRIP6_HUMAN	TRIP6	Thyroid receptor-interacting protein 6			n[305]GGLRPGS[167]LDAEIDLLSSTLAELNGGR	Color2 [DarkGray]	1	4		30266018	1.05905	2.1212	1.27888	2.12441	1.15333	2.16951
+	3.36301	0.974566	sp|Q8N122|RPTOR_HUMAN	RPTOR	Regulatory-associated protein of mTOR			n[305]LRS[167]VSSYGNIR	Color2 [DarkGray]	1	4		10362717	-0.287602	0.870147	-0.0357432	0.770478	-0.0518026	0.907924
+	4.03095	0.974327	sp|Q9UHB6|LIMA1_HUMAN	LIMA1	LIM domain and actin-binding protein 1			n[305]SLNWS[167]SFVDNTFAEEFTTQNQK	Color2 [DarkGray]	1	4		21275622	-0.512846	0.480268	-0.429299	0.622957	-0.359306	0.518303
+	2.76095	0.973682	sp|P61764|STXB1_HUMAN	STXBP1	Syntaxin-binding protein 1			n[305]S[167]SASFSTTAVSAR	Color2 [DarkGray]	1	4		2.89535e+06	-0.779324	0.162292	-0.597813	0.107041	-0.802721	0.471854
+	1.46661	0.973331	sp|Q8IZP0|ABI1_HUMAN	ABI1	Abl interactor 1			n[305]QIS[167]RHNS[167]TTSSTSSGGYR	Color2 [DarkGray]	1	4		6896666	-0.429506	0.217119	-1.17209	-0.318498	-1.12248	0.297296
+	2.17799	0.973311	sp|Q96Q89|KI20B_HUMAN	KIF20B	Kinesin-like protein KIF20B			n[305]VAIRPSS[167]K	Color2 [DarkGray]	1	4		4.7236e+06	-0.499838	0.822548	-0.335993	0.212299	-0.39529	0.653964
+	2.105	0.97295	sp|Q15014|MO4L2_HUMAN	MORF4L2	Mortality factor 4-like protein 2			n[305]SAENPPSGS[167]VRK	Color2 [DarkGray]	1	4		291407936	0.576028	1.84681	1.20106	1.69761	0.707437	1.85895
+	1.49151	0.971709	sp|Q13263|TIF1B_HUMAN	TRIM28	Transcription intermediary factor 1-beta			n[305]FS[167]AVLVEPPPM[147]SLPGAGLSSQELSGGPGDGP	Color2 [DarkGray]	1	4		4294670	-1.79165	-0.372383	-0.846026	-0.61598	-1.48209	-0.216274
+	2.00679	0.971681	sp|Q9H063|MAF1_HUMAN	MAF1	Repressor of RNA polymerase III transcription MAF1 homolog			n[305]QFCQEGQPHVLEALS[167]PPQTS[167]GLSPSR	Color2 [DarkGray]	1	4		5849181	-1.31908	0.134208	-1.2009	-0.240967	-1.0358	-0.533973
+	2.47294	0.971493	sp|Q14137|BOP1_HUMAN	BOP1	Ribosome biogenesis protein BOP1	TGFBI	sp|Q15582|BGH3_HUMAN	n[305]AS[167]QRSVR	Color2 [DarkGray]	1	4		2.01223e+06	-0.665516	0.273041	-0.35873	0.284111	-0.766967	0.566113
+	2.97271	0.971143	sp|Q7Z5L9|I2BP2_HUMAN	IRF2BP2	Interferon regulatory factor 2-binding protein 2			n[305]RPAS[167]VSSSAAVEHEQR	Color2 [DarkGray]	1	4		150220256	-1.15717	-0.332284	-1.2385	-0.361526	-1.22375	-0.0121813
+	1.72778	0.971088	sp|Q5JTV8|TOIP1_HUMAN	TOR1AIP1	Torsin-1A-interacting protein 1			n[305]MQNDS[167]ILK	Color2 [DarkGray]	1	4		28788584	1.5913	2.50222	1.9056	2.31041	1.41515	3.01268
+	2.43718	0.97095	sp|Q17R98|ZN827_HUMAN	ZNF827	Zinc finger protein 827			n[305]HLS[167]LHTEERK	Color2 [DarkGray]	1	4		3414241	-0.392435	0.620642	-0.260639	0.371047	-0.363705	0.904384
+	2.25043	0.970437	sp|Q14699|RFTN1_HUMAN	RFTN1	Raftlin			n[305]FQWRFS[167]REEMHNR	Color2 [DarkGray]	1	4		13144784	-1.77721	-0.611567	-1.53114	-0.870996	-1.44237	-0.356846
+	1.67377	0.970236	sp|Q86WR7|PRSR2_HUMAN	PROSER2	Proline and serine-rich protein 2			n[305]ADS[167]LPRPQGITVQFAGR	Color2 [DarkGray]	1	4		17992078	0.610347	2.01266	1.46508	1.80373	0.888111	2.05786
+	1.43157	0.970126	sp|Q96Q42|ALS2_HUMAN	ALS2	Alsin			n[305]S[167]DS[167]RSESPEPGYVVTSSGLLLPVLLPR	Color2 [DarkGray]	1	4		0	-2.32594	-1.33245	-2.63981	-1.02257	-1.63169	-1.33205
+	2.67205	0.969578	sp|Q15398|DLGP5_HUMAN	DLGAP5	Disks large-associated protein 5			n[305]ILVELDET[181]SQGLVPEK	Color2 [DarkGray]	1	4		0	0.175389	0.99272	-0.181592	1.04779	0.249445	1.11147
+	2.4549	0.969477	sp|Q9NRM7|LATS2_HUMAN	LATS2	Serine/threonine-protein kinase LATS2			n[305]CLAHS[167]LVGTPNYIAPEVLLRK	Color2 [DarkGray]	1	4		1.94931e+06	-1.19039	-0.649468	-1.57331	-0.368327	-1.60141	-0.438875
+	2.02064	0.969057	sp|Q9BTT6|LRRC1_HUMAN	LRRC1	Leucine-rich repeat-containing protein 1			n[305]AVNRVS[167]AIR	Color2 [DarkGray]	1	4		3.28136e+06	-0.451233	0.610236	-0.34556	0.221712	-0.348756	0.929674
+	2.41473	0.968892	sp|P61026|RAB10_HUMAN	RAB10	Ras-related protein Rab-10			n[305]FHT[181]ITTSYYR	Color2 [DarkGray]	1	4		10638201	-0.0667267	1.06667	0.236316	0.756546	-0.0990801	1.15397
+	1.78504	0.968338	sp|Q86V48|LUZP1_HUMAN	LUZP1	Leucine zipper protein 1			n[305]ASHMGVS[167]TDS[167]GTQETK	Color2 [DarkGray]	1	4		17449154	0.867003	1.71251	0.130355	1.48246	0.625315	1.33271
+	1.84385	0.967775	sp|O00443|P3C2A_HUMAN	PIK3C2A	Phosphatidylinositol 4-phosphate 3-kinase C2 domain-containing subunit alpha			n[305]FLGHAQM[147]FGS[167]FKR	Color2 [DarkGray]	1	4		1.75682e+06	-2.02868	-0.987597	-2.20893	-1.5166	-1.94592	-0.776011
+	1.51623	0.967668	sp|Q8WYL5|SSH1_HUMAN	SSH1	Protein phosphatase Slingshot homolog 1			n[305]LLFS[167]NESEKPTTNSYLMQHQESIIQLQK	Color2 [DarkGray]	1	4		2182609	0.193273	0.769048	-0.177022	0.528258	-0.76078	0.861169
+	3.19335	0.96765	sp|Q5JU85|IQEC2_HUMAN	IQSEC2	IQ motif and SEC7 domain-containing protein 2			n[305]LRS[167]SASESR	Color2 [DarkGray]	1	4		9297395	0.142623	1.29135	0.46702	1.22497	0.34264	1.33891
+	2.74236	0.967585	sp|Q5VZK9|CARL1_HUMAN	CARMIL1	F-actin-uncapping protein LRRC16A			n[305]KS[167]SGFLNLIK	Color2 [DarkGray]	1	4		2.43319e+06	-0.600844	0.185305	-0.707837	0.24327	-0.579038	0.586462
+	3.31548	0.967466	sp|Q12802|AKP13_HUMAN	AKAP13	A-kinase anchor protein 13			n[305]S[167]LSRPSSLIEQEK	Color2 [DarkGray]	1	4		58077844	1.00691	2.21225	1.20929	2.03777	1.26414	2.13272
+	2.35466	0.966394	sp|Q13099|IFT88_HUMAN	IFT88	Intraflagellar transport protein 88 homolog			n[305]REGS[167]ASGDSGQNYSASSK	Color2 [DarkGray]	1	4		9789061	-1.32094	-0.0471315	-0.810622	-0.0336847	-0.836756	0.0116768
+	2.26067	0.966366	sp|P08582|TRFM_HUMAN	MELTF	Melanotransferrin			n[305]LCRGDS[167]SGEGVCDK	Color2 [DarkGray]	1	4		5.08514e+06	0.373661	1.64578	0.380581	1.03283	0.386825	1.36155
+	2.15661	0.966038	sp|Q9Y446|PKP3_HUMAN	PKP3	Plakophilin-3			n[305]LSS[167]GFDDIDLPSAVK	Color2 [DarkGray]	1	4		33315512	1.25099	2.65122	1.62692	2.5406	1.87274	2.45695
+	3.54477	0.96581	sp|Q96FK6|WDR89_HUMAN	WDR89	WD repeat-containing protein 89			n[305]VHSNDS[167]YK	Color2 [DarkGray]	1	4		158512912	0.387966	1.56078	0.582151	1.38459	0.465161	1.38734
+	2.60403	0.964946	sp|Q9UMY1|NOL7_HUMAN	NOL7	Nucleolar protein 7			n[305]QQAAQAFIHNS[167]LYGPGTNR	Color2 [DarkGray]	1	4		3.33271e+06	-0.448586	0.640612	-0.224225	0.348056	-0.533582	0.699777
+	1.88487	0.964587	sp|Q8WUM9|S20A1_HUMAN	SLC20A1	Sodium-dependent phosphate transporter 1			n[305]LTWPNADS[167]K	Color2 [DarkGray]	1	4		5037566	-1.95396	-0.91189	-1.5381	-1.15584	-2.12431	-0.654881
+	1.3579	0.964363	sp|P46821|MAP1B_HUMAN	MAP1B	Microtubule-associated protein 1B			n[305]SDISPLTPRESSPLY[243]SPTFSDSTSAVK	Color2 [DarkGray]	1	4		1.91399e+06	-0.874089	-0.33779	-0.660539	0.712827	-0.527813	0.455609
+	1.86122	0.963437	sp|Q7Z333|SETX_HUMAN	SETX	Probable helicase senataxin			n[305]SDTLTDS[167]QIDRDLHK	Color2 [DarkGray]	1	4		11607848	0.277	1.77186	0.769656	1.68792	0.992146	1.46933
+	2.74558	0.96343	sp|Q9UPR3|SMG5_HUMAN	SMG5	Protein SMG5			n[305]FS[167]RLSCLR	Color2 [DarkGray]	1	4		36956692	0.402035	1.62088	0.687076	1.29535	0.499341	1.56251
+	2.90937	0.963383	sp|Q8TF72|SHRM3_HUMAN	SHROOM3	Protein Shroom3			n[305]AY[243]RNSIK	Color2 [DarkGray]	1	4		76047080	0.807897	1.84807	0.966034	1.75979	1.03109	2.08731
+	2.62483	0.963039	sp|Q9BYP7|WNK3_HUMAN	WNK3	Serine/threonine-protein kinase WNK3			n[305]AM[147]SGS[167]FQR	Color2 [DarkGray]	1	4		5364288	-0.773588	0.146581	-0.862791	-0.06635	-0.765103	0.407405
+	3.10745	0.963025	sp|Q9NUY8|TBC23_HUMAN	TBC1D23	TBC1 domain family member 23			n[305]HVS[167]SSDR	Color2 [DarkGray]	1	4		22083514	0.249656	1.25517	0.362413	1.08326	0.0504131	1.21313
+	3.76553	0.962712	sp|Q5T5Y3|CAMP1_HUMAN	CAMSAP1	Calmodulin-regulated spectrin-associated protein 1			n[305]SVHREES[167]CSDSGTK	Color2 [DarkGray]	1	4		6861423	-0.452932	0.612644	-0.280541	0.636136	-0.226446	0.679436
+	1.53573	0.962701	sp|Q9Y4H2|IRS2_HUMAN	IRS2	Insulin receptor substrate 2			n[305]LLPNGDYLNVS[167]PSDAVTTGTPPDFFSAALHPGGEPLR	Color2 [DarkGray]	1	4		16219579	0.240438	1.06417	0.36328	1.71706	0.909271	1.61986
+	2.91786	0.962485	sp|P36551|HEM6_HUMAN	CPOX	Oxygen-dependent coproporphyrinogen-III oxidase, mitochondrial			n[305]GLGHGS[167]TSR	Color2 [DarkGray]	1	4		981993	-1.48865	-0.502218	-1.22905	-0.502301	-1.6253	-0.451026
+	1.84241	0.961804	sp|P51991|ROA3_HUMAN	HNRNPA3	Heterogeneous nuclear ribonucleoprotein A3			n[305]SSGSPYGGGYGSGGGSGGY[243]GSRR	Color2 [DarkGray]	1	4		1.83457e+06	-1.66085	-0.179778	-1.0617	-0.701517	-1.37464	-0.330485
+	2.2529	0.961562	sp|Q99959|PKP2_HUMAN	PKP2	Plakophilin-2			n[305]GRSS[167]VGNGNLHR	Color2 [DarkGray]	1	4		74647776	-0.506141	0.399441	-0.345434	0.358394	-0.386259	0.889018
+	2.01324	0.961256	sp|Q14241|ELOA1_HUMAN	ELOA	Elongin-A			n[305]DREGSS[167]LK	Color2 [DarkGray]	1	4		5450416	-1.45011	-0.0589628	-0.967044	-0.265353	-0.810755	-0.0198212
+	1.86131	0.960965	sp|Q02878|RL6_HUMAN	RPL6	60S ribosomal protein L6			n[305]KPFS[167]QHVR	Color2 [DarkGray]	1	4		8660725	0.470942	1.69687	0.525168	0.971821	0.366173	1.57649
+	2.3138	0.960955	sp|Q6Y7W6|GGYF2_HUMAN	GIGYF2	GRB10-interacting GYF protein 2			n[305]S[167]ESENWR	Color2 [DarkGray]	1	4		261116160	4.85729	5.91737	4.53425	5.49061	4.63239	5.49881
+	2.39007	0.960908	sp|Q9UQ80|PA2G4_HUMAN	PA2G4	Proliferation-associated protein 2G4			n[305]ALLQSSAS[167]RK	Color2 [DarkGray]	1	4		54364868	1.42362	2.7734	1.68288	2.29004	1.65006	2.57585
+	1.52548	0.96083	sp|P42345|MTOR_HUMAN	MTOR	Serine/threonine-protein kinase mTOR			n[305]T[181]RT[181]DSYSAGQSVEILDGVELGEPAHK	Color2 [DarkGray]	1	4		3647300	-0.322727	1.23194	0.626645	1.26437	0.32424	1.01435
+	1.96374	0.960673	sp|Q9BUJ2|HNRL1_HUMAN	HNRNPUL1	Heterogeneous nuclear ribonucleoprotein U-like protein 1			n[305]DNNNSNNRGS[167]YNR	Color2 [DarkGray]	1	4		16615890	-2.32592	-0.998376	-1.87972	-0.851428	-1.64784	-1.12166
+	3.27146	0.960278	sp|Q96IZ0|PAWR_HUMAN	PAWR	PRKC apoptosis WT1 regulator protein			n[305]STTSVS[167]EEDVSSR	Color2 [DarkGray]	1	4		16619503	-0.411861	0.71664	-0.301145	0.631719	-0.102541	0.716927
+	2.28131	0.960112	sp|Q8IWE2|NXP20_HUMAN	FAM114A1	Protein NOXP20			n[305]TVS[167]LSQMLR	Color2 [DarkGray]	1	4		104221672	1.34671	2.2895	1.5973	2.16477	1.05575	2.42584
+	2.47771	0.95982	sp|Q8IZP0|ABI1_HUMAN	ABI1	Abl interactor 1			n[305]T[181]ASLNQRPR	Color2 [DarkGray]	1	4		781216640	0.173911	1.2741	0.611656	1.20335	0.167199	1.35477
+	1.85709	0.95969	sp|Q9P2N6|KANL3_HUMAN	KANSL3	KAT8 regulatory NSL complex subunit 3			n[305]DFQTS[167]ARR	Color2 [DarkGray]	1	4		5.92618e+06	-0.470301	0.362506	-0.577454	-0.041357	-0.969372	0.540794
+	2.51323	0.959102	sp|Q15056|IF4H_HUMAN	EIF4H	Eukaryotic translation initiation factor 4H			n[305]TGPPMGS[167]RFR	Color2 [DarkGray]	1	4		3204844	-0.290359	0.757951	-0.0461144	0.512783	-0.358346	0.911752
+	3.97784	0.958563	sp|Q96S65|CSRN1_HUMAN	CSRNP1	Cysteine/serine-rich nuclear protein 1			n[305]S[167]CSPSSSVSR	Color2 [DarkGray]	1	4		13382871	-0.163213	0.822234	-0.279925	0.788521	-0.157794	0.664003
+	1.90859	0.958528	sp|Q09666|AHNK_HUMAN	AHNAK	Neuroblast differentiation-associated protein AHNAK			n[305]VSVGAPDLSLEAS[167]EGSIKLPK	Color2 [DarkGray]	1	4		24811312	0.720057	1.36281	0.545865	1.27142	0.412587	1.91986
+	2.12426	0.95836	sp|Q86YP4|P66A_HUMAN	GATAD2A	Transcriptional repressor p66-alpha			n[305]GAQQIHS[167]IR	Color2 [DarkGray]	1	4		4743501	-0.796981	0.106517	-0.705602	-0.0177612	-0.683702	0.600039
+	2.83271	0.957999	sp|Q9UHB7|AFF4_HUMAN	AFF4	AF4/FMR2 family member 4			n[305]ESYNNSGSS[167]SRK	Color2 [DarkGray]	1	4		1.43954e+06	-1.11775	0.103569	-1.05566	-0.314402	-1.04931	-0.137883
+	2.64006	0.957961	sp|P09132|SRP19_HUMAN	SRP19	Signal recognition particle 19 kDa protein			n[305]TGGADQSLQQGEGS[167]KK	Color2 [DarkGray]	1	4		5.25204e+06	0.74992	1.70148	0.832057	1.61879	0.909631	2.04522
+	3.72819	0.957187	sp|Q2M1Z3|RHG31_HUMAN	ARHGAP31	Rho GTPase-activating protein 31			n[305]GQRLS[167]VEK	Color2 [DarkGray]	1	4		22991598	2.235	3.20324	2.222	3.0921	2.296	3.32922
+	2.12207	0.957124	sp|O96013|PAK4_HUMAN	PAK4	Serine/threonine-protein kinase PAK 4			n[305]FAGHSEAGGGS[167]GDRRR	Color2 [DarkGray]	1	4		40159944	-0.581663	0.457982	-0.307106	0.360842	-0.268012	0.895768
+	1.75817	0.957112	sp|Q9BZX2|UCK2_HUMAN	UCK2	Uridine-cytidine kinase 2			n[305]RQAS[167]ESSSRPH	Color2 [DarkGray]	1	4		1.01762e+06	-2.70217	-2.21458	-3.10375	-2.20873	-3.07645	-1.58773
+	1.45672	0.956911	sp|Q8N0T1|RBIS_HUMAN	RBIS	Ribosomal biogenesis factor			n[305]S[167]ISLEPLQK	Color2 [DarkGray]	1	4		2.29667e+06	-2.27682	-0.733567	-1.42636	-1.27567	-1.91651	-0.73972
+	2.79534	0.956704	sp|Q9BTE3|MCMBP_HUMAN	MCMBP	Mini-chromosome maintenance complex-binding protein			n[305]VSPS[167]TSYTPSR	Color2 [DarkGray]	1	4		1.83468e+06	-1.49899	-0.791712	-1.87904	-0.807362	-1.70779	-0.61663
+	2.32081	0.956541	sp|Q96S94|CCNL2_HUMAN	CCNL2	Cyclin-L2			n[305]GS[167]EIRGSRK	Color2 [DarkGray]	1	4		2199830	0.314033	1.62667	0.523786	1.13528	0.572227	1.51771
+	3.02868	0.9561	sp|Q9C0J8|WDR33_HUMAN	WDR33	pre-mRNA 3' end processing protein WDR33		rev_sp|Q8NBA8|DTWD2_HUMAN	n[305]REES[167]FRR	Color2 [DarkGray]	1	4		4401681	-0.516906	0.411722	-0.43352	0.328747	-0.496736	0.680669
+	1.35289	0.955995	sp|Q96GX5|GWL_HUMAN	MASTL	Serine/threonine-protein kinase greatwall			n[305]CLT[181]SNLLQSRK	Color2 [DarkGray]	1	4		629909	-1.94034	-0.675642	-1.65402	-1.44282	-1.7602	-0.368114
+	2.17357	0.955837	sp|P24588|AKAP5_HUMAN	AKAP5	A-kinase anchor protein 5			n[305]GAWAS[167]LK	Color2 [DarkGray]	1	4		1.75223e+06	-1.41	-0.32143	-0.975024	-0.483103	-1.55071	-0.263694
+	3.5152	0.95435	sp|P52272|HNRPM_HUMAN	HNRNPM	Heterogeneous nuclear ribonucleoprotein M			n[305]VGS[167]EIER	Color2 [DarkGray]	1	4		118397080	3.87295	4.94711	3.78513	4.71395	3.94063	4.80069
+	1.88775	0.95435	sp|Q5SW79|CE170_HUMAN	CEP170	Centrosomal protein of 170 kDa			n[305]T[181]RLGSLSAR	Color2 [DarkGray]	1	4		6817713	0.897717	2.32359	1.48867	1.97518	1.41572	2.36638
+	1.57239	0.954061	sp|Q9BXB5|OSB10_HUMAN	OSBPL10	Oxysterol-binding protein-related protein 10			n[305]AVQGT[181]DGGGGS[167]NSSSRSSSR	Color2 [DarkGray]	1	4		2259852	-2.93407	-1.47615	-2.0339	-1.75623	-2.6053	-1.4787
+	2.20785	0.953589	sp|Q14241|ELOA1_HUMAN	ELOA	Elongin-A			n[305]DREGS[167]SLK	Color2 [DarkGray]	1	4		1782700	-1.9348	-0.737431	-1.33406	-0.684959	-1.58673	-0.572438
+	2.50628	0.953416	sp|P09651|ROA1_HUMAN	HNRNPA1	Heterogeneous nuclear ribonucleoprotein A1	HNRNPA1L2	sp|Q32P51|RA1L2_HUMAN	n[305]EDS[167]QRPGAHLTVK	Color2 [DarkGray]	1	4		29450870	-1.45729	-0.683369	-1.6524	-0.616117	-1.34514	-0.295094
+	1.71398	0.953362	sp|Q0ZGT2|NEXN_HUMAN	NEXN	Nexilin			n[305]CLS[167]LVMDDEIESEAKK	Color2 [DarkGray]	1	4		2.76158e+06	-0.766746	-0.362506	-1.00328	-0.147589	-1.26246	0.337695
+	3.84966	0.953076	sp|Q9Y520|PRC2C_HUMAN	PRRC2C	Protein PRRC2C			n[305]GPS[167]FNQER	Color2 [DarkGray]	1	4		33561056	2.19035	3.10976	2.00077	2.98606	2.12527	3.0798
+	1.46021	0.952075	sp|Q9H3Q1|BORG4_HUMAN	CDC42EP4	Cdc42 effector protein 4			n[305]RS[167]QSVTRGER	Color2 [DarkGray]	1	4		87272008	-0.21364	0.465158	0.164653	0.604881	-0.546343	1.19085
+	1.8858	0.952008	sp|P34910|EVI2B_HUMAN	EVI2B	Protein EVI2B			n[305]S[167]TLLADDLEIK	Color2 [DarkGray]	1	4		11347170	-0.988528	0.357006	-0.556467	-0.104944	-0.59232	0.466646
+	1.39555	0.951801	sp|Q9P227|RHG23_HUMAN	ARHGAP23	Rho GTPase-activating protein 23			n[305]SVCSGAS[167]GRR	Color2 [DarkGray]	1	4		1.25463e+06	-1.90619	-0.645561	-1.69104	-1.52194	-2.00102	-0.575343
+	1.20882	0.950789	sp|Q9UBN7|HDAC6_HUMAN	HDAC6	Histone deacetylase 6			n[305]S[167]RQNPQSPPQDSSVTSK	Color2 [DarkGray]	1	4		1.49661e+06	-3.9608	-2.41897	-2.97348	-2.5878	-2.95965	-2.0348
+	2.28109	0.950509	sp|Q96FK6|WDR89_HUMAN	WDR89	WD repeat-containing protein 89			n[305]VRVHSNDS[167]YK	Color2 [DarkGray]	1	4		20627228	0.992215	2.13435	1.44939	1.94377	0.980697	2.1957
+	2.12277	0.950473	sp|Q6NZI2|CAVN1_HUMAN	CAVIN1	Caveolae-associated protein 1			n[305]T[181]RHTLEK	Color2 [DarkGray]	1	4		29041020	2.73635	3.86301	3.3346	3.9248	2.9895	4.12405
+	1.7163	0.949789	sp|Q6PFW1|VIP1_HUMAN	PPIP5K1	Inositol hexakisphosphate and diphosphoinositol-pentakisphosphate kinase 1			n[305]LPPAS[167]LK	Color2 [DarkGray]	1	4		12035190	0.451283	1.89575	1.23776	1.56983	0.795154	1.86799
+	2.0622	0.949374	sp|P11169|GTR3_HUMAN	SLC2A3	Solute carrier family 2, facilitated glucose transporter member 3			n[305]DGVMEM[147]NS[167]IEPAK	Color2 [DarkGray]	1	4		1.34365e+06	-1.79691	-0.653649	-1.47289	-1.01704	-1.66768	-0.418661
+	1.36842	0.949059	sp|Q9H7N4|SFR19_HUMAN	SCAF1	Splicing factor, arginine/serine-rich 19			n[305]LALS[167]LFRPGGR	Color2 [DarkGray]	1	4		642050	-3.13435	-2.53908	-3.99522	-2.68614	-3.12873	-2.1859
+	2.38994	0.948786	sp|P09132|SRP19_HUMAN	SRP19	Signal recognition particle 19 kDa protein			n[305]TGGADQSLQQGEGS[167]K	Color2 [DarkGray]	1	4		3939200	-0.528074	0.66087	-0.480156	0.169701	-0.399005	0.608552
+	3.03919	0.948372	sp|Q14693|LPIN1_HUMAN	LPIN1	Phosphatidate phosphatase LPIN1			n[305]NTTIKEES[167]KPEQCLAGK	Color2 [DarkGray]	1	4		3.64875e+06	0.365309	1.26908	0.439008	1.15111	0.212762	1.442
+	1.8575	0.94796	sp|P50454|SERPH_HUMAN	SERPINH1	Serpin H1			n[305]RS[167]ALQSINEWAAQTTDGKLPEVTK	Color2 [DarkGray]	1	4		659703	-2.45885	-1.41623	-2.05457	-1.25408	-1.89835	-0.897583
+	1.9995	0.947739	sp|Q09666|AHNK_HUMAN	AHNAK	Neuroblast differentiation-associated protein AHNAK			n[305]ADIDVS[167]GPKVDVECPDVNIEGPEGK	Color2 [DarkGray]	1	4		0	-0.986802	0.0367508	-1.0203	-0.509416	-1.20222	0.10656
+	2.51016	0.947601	sp|O14974|MYPT1_HUMAN	PPP1R12A	Protein phosphatase 1 regulatory subunit 12A			n[305]S[167]CSFGRR	Color2 [DarkGray]	1	4		25763646	-0.0893631	0.952036	0.374401	1.09245	0.0676899	1.15105
+	2.90526	0.947423	sp|O60231|DHX16_HUMAN	DHX16	Pre-mRNA-splicing factor ATP-dependent RNA helicase DHX16			n[305]LGAAS[167]LK	Color2 [DarkGray]	1	4		12582413	0.906562	1.87928	0.906108	1.63633	0.897407	2.03674
+	1.69167	0.947331	sp|Q99959|PKP2_HUMAN	PKP2	Plakophilin-2			n[305]S[167]QAGHTLHHQES[167]RR	Color2 [DarkGray]	1	4		2.88607e+06	-1.44345	-0.222537	-0.71579	-0.392791	-1.2331	0.0649767
+	1.95772	0.946424	sp|Q14160|SCRIB_HUMAN	SCRIB	Protein scribble homolog			n[305]KDT[181]PHYKK	Color2 [DarkGray]	1	4		31869940	2.14449	3.19376	2.51899	2.92849	2.1335	3.514
+	3.02167	0.9449	sp|Q14676|MDC1_HUMAN	MDC1	Mediator of DNA damage checkpoint protein 1			n[305]TPET[181]VVPTAPELQISTSTDQPVTPKPTSR	Color2 [DarkGray]	1	4		5474494	0.505523	1.38781	0.744379	1.56735	0.473791	1.60323
+	1.5829	0.943058	sp|O00425|IF2B3_HUMAN	IGF2BP3	Insulin-like growth factor 2 mRNA-binding protein 3			n[305]GLGQRGS[167]SR	Color2 [DarkGray]	1	4		6492796	-1.34028	-0.244155	-1.33854	-0.756279	-1.03237	0.118411
+	1.91161	0.943031	sp|Q16836|HCDH_HUMAN	HADH	Hydroxyacyl-coenzyme A dehydrogenase, mitochondrial			n[305]S[167]VSSSSTASASAK	Color2 [DarkGray]	1	4		7.80502e+06	-2.10876	-0.652061	-1.48033	-0.950911	-1.56048	-0.717509
+	2.56004	0.943016	sp|P49815|TSC2_HUMAN	TSC2	Tuberin			n[305]VVS[167]S[167]EGGRPSVDLSFQPSQPLSK	Color2 [DarkGray]	1	4		5.79809e+06	0.248675	1.42755	0.643319	1.52185	0.456092	1.22773
+	2.76956	0.942633	sp|Q6UN15|FIP1_HUMAN	FIP1L1	Pre-mRNA 3'-end-processing factor FIP1			n[305]NST[181]SSQSQTSTASRK	Color2 [DarkGray]	1	4		3536857	-0.582526	0.421046	-0.416029	0.232882	-0.542974	0.632443
+	3.71208	0.942171	sp|Q92615|LAR4B_HUMAN	LARP4B	La-related protein 4B			n[305]LS[167]SLIIGPSK	Color2 [DarkGray]	1	4		3.92594e+06	-1.35616	-0.259338	-1.34006	-0.405075	-1.291	-0.496297
+	2.63192	0.941995	sp|Q9C0C2|TB182_HUMAN	TNKS1BP1	182 kDa tankyrase-1-binding protein			n[305]TYGTTTAPRDEDGSTLFRGWS[167]QEGPVK	Color2 [DarkGray]	1	4		18831132	1.62559	2.70773	1.7664	2.52024	1.9097	2.89969
+	1.46079	0.941455	sp|Q9UKI2|BORG2_HUMAN	CDC42EP3	Cdc42 effector protein 3			n[305]AHLGQFPGHNEFFRANSTS[167]DSVFTETPSPVLK	Color2 [DarkGray]	1	4		1.15311e+06	-2.36587	-2.06111	-2.3337	-1.14048	-2.6048	-1.27841
+	2.67035	0.941259	sp|Q8WYL5|SSH1_HUMAN	SSH1	Protein phosphatase Slingshot homolog 1			n[305]LLFSNESEKPTTNSYLM[147]QHQES[167]IIQLQK	Color2 [DarkGray]	1	4		3.56245e+06	0.276166	1.29923	0.0961289	0.888407	0.0881596	1.09659
+	2.63637	0.941153	sp|Q09666|AHNK_HUMAN	AHNAK	Neuroblast differentiation-associated protein AHNAK			n[305]M[147]PEMS[167]IK	Color2 [DarkGray]	1	4		2.55655e+06	-1.32316	-0.136995	-1.13211	-0.54159	-1.25881	-0.212045
+	1.95581	0.94089	sp|Q9Y2U8|MAN1_HUMAN	LEMD3	Inner nuclear membrane protein Man1			n[305]DRAS[167]LQYR	Color2 [DarkGray]	1	4		14504639	0.806386	1.78836	1.03612	1.50746	0.815989	2.18535
+	3.41898	0.940739	sp|Q8NFH8|REPS2_HUMAN	REPS2	RalBP1-associated Eps domain-containing protein 2			n[305]APS[167]QAAESSPAK	Color2 [DarkGray]	1	4		9427973	-0.571528	0.266936	-0.590232	0.510404	-0.446146	0.436969
+	2.35984	0.939907	sp|P08670|VIME_HUMAN	VIM	Vimentin			n[305]RMFGGPGTASRPS[167]SSR	Color2 [DarkGray]	1	4		26112582	-1.75148	-0.491683	-1.39232	-0.84624	-1.48888	-0.47504
+	2.17374	0.939102	sp|P17028|ZNF24_HUMAN	ZNF24	Zinc finger protein 24			n[305]S[167]SILVQHQR	Color2 [DarkGray]	1	4		4801079	-2.76542	-1.40455	-2.4631	-1.81186	-2.30758	-1.50238
+	2.35838	0.938985	sp|P18615|NELFE_HUMAN	NELFE	Negative elongation factor E			n[305]RS[167]RTLEGK	Color2 [DarkGray]	1	4		155344128	0.437318	1.53696	0.859282	1.4128	0.609191	1.77299
+	3.90401	0.938955	sp|Q8N392|RHG18_HUMAN	ARHGAP18	Rho GTPase-activating protein 18			n[305]GDDATLPS[167]FRLPK	Color2 [DarkGray]	1	4		5031615	-0.0190887	0.821323	-0.152611	0.965728	-0.0388823	0.819232
+	1.67365	0.938362	sp|Q9UJF2|NGAP_HUMAN	RASAL2	Ras GTPase-activating protein nGAP			n[305]NT[181]SFRLPSLR	Color2 [DarkGray]	1	4		35065712	-1.96453	-0.376925	-1.72819	-0.981372	-1.37359	-0.892931
+	1.84972	0.937814	sp|Q9C0C2|TB182_HUMAN	TNKS1BP1	182 kDa tankyrase-1-binding protein			n[305]GWS[167]QEGPVK	Color2 [DarkGray]	1	4		85181424	1.91304	3.46944	2.29686	2.96518	2.46395	3.05267
+	2.36008	0.937024	sp|Q8IY17|PLPL6_HUMAN	PNPLA6	Patatin-like phospholipase domain-containing protein 6			n[305]RMVS[167]TSATDEPR	Color2 [DarkGray]	1	4		9759427	-0.148431	1.01574	-0.0815711	0.883163	0.344848	1.02701
+	2.49762	0.936838	sp|P47756|CAPZB_HUMAN	CAPZB	F-actin-capping protein subunit beta			n[305]ELS[167]QVLTQR	Color2 [DarkGray]	1	4		11699135	0.84889	2.16089	1.23476	1.9329	1.25653	2.0569
+	1.59927	0.936576	sp|P16070|CD44_HUMAN	CD44	CD44 antigen			n[305]KLVINS[167]GNGAVEDRKPS[167]GLNGEASK	Color2 [DarkGray]	1	4		705304	-0.76987	-0.0829153	-0.654717	-0.20682	-1.18207	0.492805
+	1.44369	0.936397	sp|Q8TDN4|CABL1_HUMAN	CABLES1	CDK5 and ABL1 enzyme substrate 1			n[305]LIS[167]QRS[167]SLETLEDIEENAPLRR	Color2 [DarkGray]	1	4		10237950	-1.59812	0.032403	-0.868674	-0.255896	-0.6377	-0.0718088
+	2.53468	0.935966	sp|Q9UPU5|UBP24_HUMAN	USP24	Ubiquitin carboxyl-terminal hydrolase 24			n[305]EQSGSSNGSESS[167]PANENGDR	Color2 [DarkGray]	1	4		1.34215e+06	-3.92787	-3.10363	-4.31705	-3.36165	-4.10646	-3.0782
+	1.41116	0.935941	sp|O95747|OXSR1_HUMAN	OXSR1	Serine/threonine-protein kinase			n[305]TLQRAPT[181]ISER	Color2 [DarkGray]	1	4		9531894	-0.582362	0.248553	-0.360408	0.113085	-0.424744	1.07867
+	2.36144	0.935763	sp|O96013|PAK4_HUMAN	PAK4	Serine/threonine-protein kinase PAK 4			n[305]FAGHSEAGGGS[167]GDR	Color2 [DarkGray]	1	4		9826863	-1.08622	0.061307	-0.74665	-0.223674	-0.925551	0.211231
+	2.38846	0.935757	sp|Q8N954|GPT11_HUMAN	GPATCH11	G patch domain-containing protein 11			n[305]SGIGHEAS[167]LK	Color2 [DarkGray]	1	4		62978644	0.189478	0.778472	-0.232319	0.809975	-0.0874166	1.08857
+	2.48487	0.935424	sp|P62633|CNBP_HUMAN	CNBP	Cellular nucleic acid-binding protein			n[305]CGES[167]GHLAR	Color2 [DarkGray]	1	4		3.56708e+06	-0.0562754	0.745399	-0.408189	0.46135	-0.406175	0.728883
+	3.26099	0.935251	sp|Q6PJF5|RHDF2_HUMAN	RHBDF2	Inactive rhomboid protein 2			n[305]NGGS[167]VSSVSSSR	Color2 [DarkGray]	1	4		8802124	-0.637409	0.225203	-0.517925	0.413828	-0.50475	0.506639
+	2.80573	0.935212	sp|P50454|SERPH_HUMAN	SERPINH1	Serpin H1			n[305]QHYNCEHS[167]K	Color2 [DarkGray]	1	4		4774320	-0.171238	0.827887	0.0199885	0.642524	-0.186445	0.99753
+	2.72249	0.935166	sp|P06748|NPM_HUMAN	NPM1	Nucleophosmin			n[305]VDNDENEHQLS[167]LR	Color2 [DarkGray]	1	4		0	2.32826	3.39719	2.25236	2.9853	2.31575	3.31938
+	2.62674	0.935087	sp|Q9H9A7|RMI1_HUMAN	RMI1	RecQ-mediated genome instability protein 1			n[305]NADRS[167]IER	Color2 [DarkGray]	1	4		1.95549e+06	-0.231135	0.512864	-0.413181	0.403605	-0.440978	0.803497
+	3.48931	0.934853	sp|Q5VZ89|DEN4C_HUMAN	DENND4C	DENN domain-containing protein 4C			n[305]SS[167]PAVSR	Color2 [DarkGray]	1	4		132504408	1.54379	2.48885	1.34257	2.36671	1.46049	2.29585
+	3.51836	0.934489	sp|Q6UN15|FIP1_HUMAN	FIP1L1	Pre-mRNA 3'-end-processing factor FIP1			n[305]NS[167]TSSQSQTSTASRK	Color2 [DarkGray]	1	4		2.93922e+06	-0.928928	0.119603	-0.783824	-0.0730934	-0.942856	0.101348
+	1.78494	0.933985	sp|P35659|DEK_HUMAN	DEK	Protein DEK			n[305]LTM[147]QVS[167]SLQREPFTIAQGK	Color2 [DarkGray]	1	4		7137621	-0.340037	1.05563	0.23184	0.598847	0.0688105	1.1081
+	2.86623	0.933956	sp|Q5T5Y3|CAMP1_HUMAN	CAMSAP1	Calmodulin-regulated spectrin-associated protein 1			n[305]LGQGRNS[167]R	Color2 [DarkGray]	1	4		846724	-1.3804	-0.346494	-1.16864	-0.403607	-1.12251	-0.119581
+	2.3588	0.933414	sp|O15231|ZN185_HUMAN	ZNF185	Zinc finger protein 185			n[305]EHSY[243]VLSAAK	Color2 [DarkGray]	1	4		25970356	0.209105	1.01117	0.236226	0.868962	-0.0426598	1.32278
+	1.30184	0.93313	sp|O14730|RIOK3_HUMAN	RIOK3	Serine/threonine-protein kinase RIO3			n[305]QHAYSEERRS[167]AR	Color2 [DarkGray]	1	4		1.09528e+06	-2.22683	-1.39617	-2.16936	-1.62943	-1.98011	-0.551315
+	2.76908	0.93258	sp|O75643|U520_HUMAN	SNRNP200	U5 small nuclear ribonucleoprotein 200 kDa helicase			n[305]ANSNLVLQADRS[167]LIDR	Color2 [DarkGray]	1	4		18229526	1.24567	2.17481	1.17326	1.93706	0.907186	2.01199
+	2.66902	0.932141	sp|P46783|RS10_HUMAN	RPS10	40S ribosomal protein S10			n[305]GEADRDT[181]YRR	Color2 [DarkGray]	1	4		23941072	1.06618	1.97301	1.34913	2.0265	1.05771	2.26993
+	3.44535	0.931773	sp|O95239|KIF4A_HUMAN	KIF4A	Chromosome-associated kinesin KIF4A			n[305]T[181]FSLTEVR	Color2 [DarkGray]	1	4		130444184	2.12021	3.15564	1.99568	2.97569	2.18009	2.95997
+	3.09677	0.931394	sp|P41236|IPP2_HUMAN	PPP1R2	Protein phosphatase inhibitor 2	PPP1R2B	sp|Q6NXS1|IPP2B_HUMAN	n[305]NKTS[167]TTSSMVASAEQPR	Color2 [DarkGray]	1	4		11868835	1.71341	2.46702	1.42077	2.62608	1.64826	2.48353
+	3.17098	0.931117	sp|O15357|SHIP2_HUMAN	INPPL1	Phosphatidylinositol 3,4,5-trisphosphate 5-phosphatase 2			n[305]AAPREEPLT[181]PR	Color2 [DarkGray]	1	4		8510152	-0.117435	0.6906	-0.106998	0.675967	-0.352732	0.849618
+	2.01942	0.930977	sp|Q8TF72|SHRM3_HUMAN	SHROOM3	Protein Shroom3			n[305]DRS[167]SSFAGGR	Color2 [DarkGray]	1	4		4084149	-0.723042	0.629402	-0.234055	0.442375	-0.106658	0.657397
+	2.70476	0.930802	sp|P48634|PRC2A_HUMAN	PRRC2A	Protein PRRC2A			n[305]WGPRPGS[167]SR	Color2 [DarkGray]	1	4		27586584	1.033	2.23457	1.12822	1.81959	1.18601	2.08546
+	2.57543	0.930685	sp|Q9H4G0|E41L1_HUMAN	EPB41L1	Band 4.1-like protein 1			n[305]HQAS[167]INELK	Color2 [DarkGray]	1	4		13811785	1.66875	2.71519	2.01256	2.60378	1.77804	2.93244
+	1.91047	0.93025	sp|Q09666|AHNK_HUMAN	AHNAK	Neuroblast differentiation-associated protein AHNAK			n[305]VGIQLPEVELSVS[167]TKKE	Color2 [DarkGray]	1	4		5632302	-2.29124	-1.2115	-1.77665	-1.21466	-1.91363	-0.764612
+	1.94076	0.930047	sp|Q96RL1|UIMC1_HUMAN	UIMC1	BRCA1-A complex subunit RAP80			n[305]EMQS[167]SFTRR	Color2 [DarkGray]	1	4		9484624	-0.818942	0.349098	-0.537822	-0.181664	-0.930608	0.335335
+	2.57527	0.92992	sp|Q9H4A6|GOLP3_HUMAN	GOLPH3	Golgi phosphoprotein 3			n[305]RT[181]EASRNAADK	Color2 [DarkGray]	1	4		1.60097e+06	-0.775389	0.333014	-0.611955	-0.0529375	-0.801045	0.321294
+	1.81574	0.929757	sp|O43520|AT8B1_HUMAN	ATP8B1	Phospholipid-transporting ATPase IC			n[305]GYADLISS[167]GRS[167]IRK	Color2 [DarkGray]	1	4		1853190	-1.70748	-0.55027	-1.33659	-1.03356	-1.90248	-0.573444
+	2.14523	0.929428	sp|O60716|CTND1_HUMAN	CTNND1	Catenin delta-1			n[305]GSLASLDS[167]LRK	Color2 [DarkGray]	1	4		97500432	0.831167	1.59299	1.0737	1.70553	0.548637	1.94326
+	2.58883	0.929399	sp|P27816|MAP4_HUMAN	MAP4	Microtubule-associated protein 4			n[305]S[167]TSTSSMK	Color2 [DarkGray]	1	4		1.79324e+06	-0.783418	0.0161934	-0.823879	-0.0693874	-0.856319	0.377775
+	1.94183	0.929301	sp|O75116|ROCK2_HUMAN	ROCK2	Rho-associated protein kinase 2			n[305]IQQNQS[167]IRRPS[167]R	Color2 [DarkGray]	1	4		28716064	0.799919	1.61364	0.579633	1.39517	0.881713	2.04036
+	1.95058	0.928758	sp|Q96RT1|ERBIN_HUMAN	ERBIN	Erbin			n[305]TM[147]S[167]VSDFNYSR	Color2 [DarkGray]	1	4		21463320	1.06198	2.34649	1.51843	2.03797	1.53324	2.51546
+	2.32696	0.92874	sp|Q6Y7W6|GGYF2_HUMAN	GIGYF2	GRB10-interacting GYF protein 2			n[305]SES[167]ENWR	Color2 [DarkGray]	1	4		232956704	4.37451	5.56776	4.37216	5.01369	4.42306	5.3745
+	2.57267	0.928602	sp|Q9H2L5|RASF4_HUMAN	RASSF4	Ras association domain-containing protein 4	RASSF2	sp|P50749|RASF2_HUMAN	n[305]HRFS[167]INGHFYNHK	Color2 [DarkGray]	1	4		7.02197e+06	0.818504	1.85302	1.01492	1.78557	1.14302	2.12366
+	2.75788	0.92841	sp|P17096|HMGA1_HUMAN	HMGA1	High mobility group protein HMG-I/HMG-Y			n[305]KQPPVS[167]PGT[181]ALVGSQKEPSEVPTPK	Color2 [DarkGray]	1	4		7.23103e+06	1.56452	2.78529	1.6536	2.37802	1.69934	2.53939
+	1.81057	0.928398	sp|O95297|MPZL1_HUMAN	MPZL1	Myelin protein zero-like protein 1			n[305]SES[167]VVYADIR	Color2 [DarkGray]	1	4		24217514	1.47743	2.39091	1.80924	2.22501	1.41572	2.87167
+	2.53397	0.927822	sp|Q9P278|FNIP2_HUMAN	FNIP2	Folliculin-interacting protein 2			n[305]VTFQIGSFAS[167]PESDFESR	Color2 [DarkGray]	1	4		0	-1.03989	-0.0848951	-0.843543	0.0190067	-1.24039	-0.274464
+	3.25806	0.92732	sp|Q9GZN2|TGIF2_HUMAN	TGIF2	Homeobox protein TGIF2			n[305]AEAGS[167]PT[181]GGLFNTPPPTPPEQDK	Color2 [DarkGray]	1	4		1.79277e+06	-2.15167	-1.10131	-2.0682	-1.09127	-2.11799	-1.36333
+	2.39271	0.92725	sp|Q9H4L5|OSBL3_HUMAN	OSBPL3	Oxysterol-binding protein-related protein 3			n[305]TYSAPAINAIQGGS[167]FES[167]PKK	Color2 [DarkGray]	1	4		3.94091e+06	0.353273	1.51525	0.713572	1.19985	0.385466	1.51897
+	2.99329	0.926673	sp|O60292|SI1L3_HUMAN	SIPA1L3	Signal-induced proliferation-associated 1-like protein 3			n[305]TASAETPRPSQLAQPSPFQLSAS[167]VPK	Color2 [DarkGray]	1	4		5536491	0.503417	1.47128	0.342182	1.15399	0.412181	1.41252
+	2.20273	0.926631	sp|Q5M775|CYTSB_HUMAN	SPECC1	Cytospin-B			n[305]EFS[167]VTVSR	Color2 [DarkGray]	1	4		26105444	-0.057828	0.938783	0.438669	1.01129	-0.0150146	1.19565
+	3.69043	0.926555	sp|P29375|KDM5A_HUMAN	KDM5A	Lysine-specific demethylase 5A			n[305]T[181]QSESGDVSR	Color2 [DarkGray]	1	4		1.74729e+06	-1.08964	-0.212329	-1.31176	-0.254669	-1.14862	-0.303355
+	3.09568	0.926194	sp|Q9Y2X9|ZN281_HUMAN	ZNF281	Zinc finger protein 281			n[305]DVLLS[167]SSSR	Color2 [DarkGray]	1	4		12687432	-0.38682	0.598375	-0.437174	0.295125	-0.485779	0.57531
+	2.41874	0.926186	sp|Q7Z6J6|FRMD5_HUMAN	FRMD5	FERM domain-containing protein 5			n[305]EVMESS[167]AK	Color2 [DarkGray]	1	4		2.51285e+06	-1.2021	-0.244382	-1.04299	-0.299653	-0.948533	0.12897
+	2.60474	0.926177	sp|P29590|PML_HUMAN	PML	Protein PML			n[305]SSPEQPRPS[167]TSK	Color2 [DarkGray]	1	4		16654546	0.300896	1.27567	0.355746	1.33988	0.682418	1.50204
+	2.53392	0.926042	sp|Q9BSJ6|PIMRE_HUMAN	PIMREG	Protein PIMREG			n[305]WQNM[147]GTS[167]VR	Color2 [DarkGray]	1	4		3757452	-0.64677	0.612598	-0.276126	0.34948	-0.319139	0.574013
+	2.3374	0.925216	sp|O75319|DUS11_HUMAN	DUSP11	RNA/RNP complex-1-interacting phosphatase			n[305]DFSGRSS[167]AK	Color2 [DarkGray]	1	4		6.78578e+06	0.25278	1.56722	0.58636	1.2118	0.640916	1.47669
+	1.38577	0.925168	sp|Q16630|CPSF6_HUMAN	CPSF6	Cleavage and polyadenylation specificity factor subunit 6			n[305]SYGS[167]GSRR	Color2 [DarkGray]	1	4		7367265	-2.23613	-0.775076	-1.64386	-1.50534	-1.86404	-0.688116
+	2.84047	0.925165	sp|Q9UPT5|EXOC7_HUMAN	EXOC7	Exocyst complex component 7			n[305]QY[243]SQHGLDGKK	Color2 [DarkGray]	1	4		9291439	1.55072	2.52603	1.83376	2.48613	1.59211	2.73992
+	2.13364	0.924956	sp|P02686|MBP_HUMAN	MBP	Myelin basic protein			n[305]DRPSESDELQTIQEDSAATSESLDVMAS[167]QKRPS[167]QR	Color2 [DarkGray]	1	4		3946248	0.181391	1.01635	0.371907	1.04082	0.283923	1.55492
+	2.25615	0.924951	sp|O43852|CALU_HUMAN	CALU	Calumenin			n[305]VHNDAQSFDY[243]DHDAFLGAEEAK	Color2 [DarkGray]	1	4		15984306	0.713902	2.01933	1.23274	1.86069	1.16164	2.00312
+	2.85824	0.924624	sp|Q9UHI6|DDX20_HUMAN	DDX20	Probable ATP-dependent RNA helicase DDX20			n[305]NNS[167]VSGLS[167]VK	Color2 [DarkGray]	1	4		1.40179e+06	-1.21606	-0.154342	-1.00593	-0.0802689	-0.827866	-0.0413742
+	2.02893	0.924595	sp|P78524|DEN2B_HUMAN	DENND2B	DENN domain-containing protein 2B			n[305]SGNWS[167]ERK	Color2 [DarkGray]	1	4		5373755	0.494683	1.55356	0.822992	1.2651	0.5843	1.8571
+	1.79193	0.924486	sp|Q5TKA1|LIN9_HUMAN	LIN9	Protein lin-9 homolog			n[305]LFS[167]DEDDRQINTRS[167]PK	Color2 [DarkGray]	1	4		3.74184e+06	0.00121498	0.749283	0.242551	0.75079	-0.177355	1.3398
+	2.86051	0.924058	sp|O15047|SET1A_HUMAN	SETD1A	Histone-lysine N-methyltransferase SETD1A	SETD1B	sp|Q9UPS6|SET1B_HUMAN	n[305]GALRLPS[167]FK	Color2 [DarkGray]	1	4		4.80484e+06	-0.286212	0.712144	-0.263707	0.405187	-0.324525	0.7804
+	3.63401	0.923683	sp|Q5VZ89|DEN4C_HUMAN	DENND4C	DENN domain-containing protein 4C			n[305]S[167]SPAVSR	Color2 [DarkGray]	1	4		106527496	1.14409	1.94885	1.15128	1.9896	0.977864	2.10584
+	1.66419	0.922994	sp|Q15286|RAB35_HUMAN	RAB35	Ras-related protein Rab-35			n[305]FRT[181]ITSTYYR	Color2 [DarkGray]	1	4		5695512	-0.124052	0.499096	-0.473859	0.335161	-0.242426	1.09439
+	1.79618	0.922691	sp|Q8WWI1|LMO7_HUMAN	LMO7	LIM domain only protein 7			n[305]S[167]TQMESTRVSASLPR	Color2 [DarkGray]	1	4		3.00347e+06	-1.33111	-0.0412617	-0.869345	-0.267548	-0.694292	0.182135
+	2.89649	0.92268	sp|Q6UUV9|CRTC1_HUMAN	CRTC1	CREB-regulated transcription coactivator 1			n[305]RPLS[167]VDK	Color2 [DarkGray]	1	4		5.77182e+06	0.652825	1.78595	0.777363	1.45525	0.794486	1.75151
+	2.96807	0.92232	sp|Q9UNH5|CC14A_HUMAN	CDC14A	Dual specificity protein phosphatase CDC14A			n[305]SFS[167]INSR	Color2 [DarkGray]	1	4		4.78474e+06	-0.604939	0.333111	-0.655393	0.241	-0.415411	0.517106
+	1.5086	0.922235	sp|Q9BT25|HAUS8_HUMAN	HAUS8	HAUS augmin-like complex subunit 8			n[305]GAGKPATGPTNS[167]SSAK	Color2 [DarkGray]	1	4		2.63552e+06	-0.409491	0.623935	-0.0293479	0.292956	-0.225546	1.18543
+	1.83215	0.921965	sp|O95081|AGFG2_HUMAN	AGFG2	Arf-GAP domain and FG repeat-containing protein 2			n[305]STQPPPHSS[167]VKK	Color2 [DarkGray]	1	4		5015772	-0.334154	0.73987	0.105408	0.490722	-0.185152	1.12141
+	1.90336	0.921802	sp|Q07666|KHDR1_HUMAN	KHDRBS1	KH domain-containing, RNA-binding, signal transduction-associated protein 1			n[305]RDDPAARMS[167]R	Color2 [DarkGray]	1	4		11229423	0.642688	1.22398	0.702396	1.38163	0.293798	1.79868
+	1.9673	0.92175	sp|O95544|NADK_HUMAN	NADK	NAD kinase			n[305]S[167]RSLSASPALGS[167]TK	Color2 [DarkGray]	1	4		2.90503e+06	-1.14145	-0.064537	-0.699248	-0.281878	-1.01269	0.258277
+	1.66095	0.921532	sp|Q09666|AHNK_HUMAN	AHNAK	Neuroblast differentiation-associated protein AHNAK			n[305]AEAS[167]IQAGAGDGEWEESEVK	Color2 [DarkGray]	1	4		6841249	-0.0244522	0.809291	-0.0238395	0.955404	0.481318	1.43293
+	2.00403	0.921144	sp|Q13426|XRCC4_HUMAN	XRCC4	DNA repair protein XRCC4			n[305]ENSRPDSS[167]LPETSKK	Color2 [DarkGray]	1	4		15406343	1.27986	2.35394	1.10456	1.77819	1.31698	2.33271
+	4.90192	0.921023	sp|Q53GA4|PHLA2_HUMAN	PHLDA2	Pleckstrin homology-like domain family A member 2			n[305]LSLFPAS[167]PR	Color2 [DarkGray]	1	4		43247776	1.67424	2.56803	1.5684	2.5308	1.65858	2.56546
+	1.36276	0.920952	sp|P20700|LMNB1_HUMAN	LMNB1	Lamin-B1		rev_sp|Q9BZA7|PC11X_HUMAN, rev_sp|Q9BZA8|PC11Y_HUMAN	n[305]ASS[167]SRS[167]VR	Color2 [DarkGray]	1	4		20395760	-0.843035	0.530944	-0.333105	-0.178768	-0.496377	0.738165
+	3.1169	0.920431	sp|P16144|ITB4_HUMAN	ITGB4	Integrin beta-4			n[305]HVT[181]QEFVSR	Color2 [DarkGray]	1	4		11589040	-0.821619	0.189463	-0.530413	0.156195	-0.752567	0.311037
+	1.88585	0.920356	sp|P55196|AFAD_HUMAN	AFDN	Afadin			n[305]STTRLDS[167]DRVSSASSTAER	Color2 [DarkGray]	1	4		14606260	-0.168444	0.347475	-0.496823	0.288946	-0.670282	0.789097
+	1.60796	0.920339	sp|O60343|TBCD4_HUMAN	TBC1D4	TBC1 domain family member 4			n[305]ILEDSGFDEQQEFRS[167]R	Color2 [DarkGray]	1	4		10090845	0.23736	1.7427	0.861672	1.30758	0.924459	1.73423
+	1.53854	0.920241	sp|P58335|ANTR2_HUMAN	ANTXR2	Anthrax toxin receptor 2			n[305]WGDKGS[167]TEEGARLEK	Color2 [DarkGray]	1	4		6.82123e+06	0.548087	1.28346	0.690387	1.08267	0.26861	1.90167
+	3.27067	0.920127	sp|P51957|NEK4_HUMAN	NEK4	Serine/threonine-protein kinase Nek4			n[305]DRPLS[167]AR	Color2 [DarkGray]	1	4		2279091	-0.476941	0.552042	-0.27367	0.394229	-0.45476	0.608741
+	2.7347	0.919458	sp|Q8NB15|ZN511_HUMAN	ZNF511	Zinc finger protein 511			n[305]HRIPS[167]TICFGQGAAR	Color2 [DarkGray]	1	4		25718196	1.6285	2.39029	1.32913	2.4256	1.68433	2.58445
+	2.53205	0.919309	sp|Q14699|RFTN1_HUMAN	RFTN1	Raftlin			n[305]FS[167]REEMHNR	Color2 [DarkGray]	1	4		25724344	0.0758085	1.13937	0.264692	0.797972	-0.0400314	1.12105
+	2.922	0.919256	sp|Q14C86|GAPD1_HUMAN	GAPVD1	GTPase-activating protein and VPS9 domain-containing protein 1			n[305]SSSLEMTPYNTPQLS[167]PATTPANKK	Color2 [DarkGray]	1	4		2.69984e+06	-1.50644	-0.394506	-1.39822	-0.565752	-1.18676	-0.3734
+	1.36919	0.919212	sp|Q0JRZ9|FCHO2_HUMAN	FCHO2	F-BAR domain only protein 2			n[305]VSIGNITLS[167]PAISR	Color2 [DarkGray]	1	4		15486317	-3.97594	-3.16422	-3.78881	-2.7676	-4.49495	-3.57025
+	2.09933	0.918439	sp|Q9HCK8|CHD8_HUMAN	CHD8	Chromodomain-helicase-DNA-binding protein 8			n[305]ESTAPAPESITLHDYTTQPAS[167]QEQPAQPVLQTSTPTSGLLQVSK	Color2 [DarkGray]	1	4		2.68302e+06	-1.58127	-0.286784	-1.15944	-0.568257	-1.09018	-0.220542
+	1.74629	0.918006	sp|P48681|NEST_HUMAN	NES	Nestin			n[305]RLGSLLPVLSPTSLPS[167]PLPAT[181]LETPVPAFLK	Color2 [DarkGray]	1	4		0	-1.7361	-0.948717	-1.35512	-0.89424	-2.03987	-0.534116
+	1.68085	0.917151	sp|P22626|ROA2_HUMAN	HNRNPA2B1	Heterogeneous nuclear ribonucleoproteins A2/B1			n[305]S[167]GNFGGSRNM[147]GGPYGGGNYGPGGSGGSGGYGGR	Color2 [DarkGray]	1	4		1.8199e+06	-2.32731	-1.22197	-1.63802	-1.25912	-2.07489	-0.807673
+	1.29232	0.916556	sp|Q14739|LBR_HUMAN	LBR	Delta(14)-sterol reductase LBR			n[305]GGS[167]TSSSPSRRR	Color2 [DarkGray]	1	4		1.89153e+06	-1.50276	-0.391531	-0.745584	-0.682029	-1.53444	0.0404434
+	2.63057	0.91645	sp|Q8N1G2|CMTR1_HUMAN	CMTR1	Cap-specific mRNA (nucleoside-2'-O-)-methyltransferase 1			n[305]DIVEASS[167]QK	Color2 [DarkGray]	1	4		3.40923e+06	-1.69859	-0.453008	-1.61156	-0.745154	-1.48082	-0.84346
+	2.71921	0.916205	sp|P35659|DEK_HUMAN	DEK	Protein DEK			n[305]LTM[147]QVSS[167]LQREPFTIAQGK	Color2 [DarkGray]	1	4		2.22149e+06	-1.59283	-0.630037	-1.40687	-0.553856	-1.27499	-0.342184
+	2.13251	0.916171	sp|Q9NPH3|IL1AP_HUMAN	IL1RAP	Interleukin-1 receptor accessory protein			n[305]RSSSDEQGLS[167]YSSLK	Color2 [DarkGray]	1	4		5.09956e+06	0.02987	0.891148	0.338817	0.883546	-0.0274372	1.31507
+	2.53064	0.916101	sp|Q01130|SRSF2_HUMAN	SRSF2	Serine/arginine-rich splicing factor 2			n[305]Y[243]GRPPDSHHSRR	Color2 [DarkGray]	1	4		374289	-2.80814	-2.12219	-3.03715	-2.14354	-2.92615	-1.7574
+	3.14633	0.915952	sp|Q7Z6J6|FRMD5_HUMAN	FRMD5	FERM domain-containing protein 5			n[305]EVM[147]ESS[167]AK	Color2 [DarkGray]	1	4		5.43985e+06	-0.923661	0.0144949	-0.811998	-0.113254	-0.911382	0.199573
+	2.31914	0.915829	sp|P53667|LIMK1_HUMAN	LIMK1	LIM domain kinase 1			n[305]S[167]CS[167]IDRSPGAGSLGSPASQRK	Color2 [DarkGray]	1	4		10387879	0.258673	1.26036	0.62132	1.48855	0.687246	1.56582
+	1.64098	0.915667	sp|O43520|AT8B1_HUMAN	ATP8B1	Phospholipid-transporting ATPase IC			n[305]GYADLIS[167]SGRS[167]IR	Color2 [DarkGray]	1	4		1.86487e+06	-2.88232	-1.38666	-2.20829	-1.63982	-2.1118	-1.42893
+	2.5556	0.915038	sp|P55196|AFAD_HUMAN	AFDN	Afadin			n[305]LDS[167]DRVSSASSTAER	Color2 [DarkGray]	1	4		35552480	0.126686	1.2632	0.158431	1.24492	0.432507	0.954613
+	1.93257	0.914876	sp|Q09666|AHNK_HUMAN	AHNAK	Neuroblast differentiation-associated protein AHNAK			n[305]FSMPS[167]LKGEGPEVDVNLPK	Color2 [DarkGray]	1	4		2.51123e+06	-0.864785	-0.088397	-0.714852	-0.190099	-1.02832	0.415165
+	2.32412	0.914857	sp|P17026|ZNF22_HUMAN	ZNF22	Zinc finger protein 22			n[305]THLPS[167]WK	Color2 [DarkGray]	1	4		10418338	-0.494079	0.669665	-0.175554	0.316225	-0.343926	0.745122
+	2.6727	0.913981	sp|Q5SSJ5|HP1B3_HUMAN	HP1BP3	Heterochromatin protein 1-binding protein 3			n[305]TVNSTRET[181]PPK	Color2 [DarkGray]	1	4		1.67479e+06	-1.0592	-0.188164	-1.3242	-0.49448	-1.21762	-0.176435
+	2.02865	0.913629	sp|O95817|BAG3_HUMAN	BAG3	BAG family molecular chaperone regulator 3			n[305]AAS[167]PFRS[167]SVQGASSR	Color2 [DarkGray]	1	4		4.62625e+06	-1.23095	-0.284665	-1.46678	-0.765574	-1.27194	-0.178544
+	3.59773	0.913624	sp|O95863|SNAI1_HUMAN	SNAI1	Zinc finger protein SNAI1			n[305]VAELTSLS[167]DEDSGK	Color2 [DarkGray]	1	4		3.93914e+06	-0.720658	0.344495	-0.706808	0.244646	-0.541302	0.182962
+	2.46868	0.912619	sp|Q96ED9|HOOK2_HUMAN	HOOK2	Protein Hook homolog 2			n[305]LAS[167]LNLRPTDK	Color2 [DarkGray]	1	4		3.32731e+06	-0.827497	0.414009	-0.378354	0.21674	-0.675171	0.226088
+	2.35882	0.911914	sp|O43399|TPD54_HUMAN	TPD52L2	Tumor protein D54			n[305]LGDM[147]RNS[167]ATFK	Color2 [DarkGray]	1	4		24163804	1.87138	2.84453	2.17804	3.01612	2.26943	3.19393
+	2.38687	0.911629	sp|Q96B23|CR025_HUMAN	C18orf25	Uncharacterized protein C18orf25			n[305]GGVIQSVSS[167]WK	Color2 [DarkGray]	1	4		7.1636e+06	0.293839	1.41761	0.620955	1.10079	0.339174	1.47045
+	3.13443	0.911538	sp|O43615|TIM44_HUMAN	TIMM44	Mitochondrial import inner membrane translocase subunit TIM44			n[305]QSAES[167]VSK	Color2 [DarkGray]	1	4		2.60448e+06	-0.610785	0.206692	-0.443283	0.403402	-0.585473	0.484979
+	2.76798	0.911176	sp|Q14152|EIF3A_HUMAN	EIF3A	Eukaryotic translation initiation factor 3 subunit A			n[305]LGDS[167]SLSRK	Color2 [DarkGray]	1	4		47106132	1.58368	2.57836	1.8895	2.80194	1.89438	2.72078
+	2.18326	0.911166	sp|Q15070|OXA1L_HUMAN	OXA1L	Mitochondrial inner membrane protein OXA1L			n[305]EGFLES[167]FKK	Color2 [DarkGray]	1	4		3.34765e+06	-1.24255	-0.0729485	-1.2985	-0.588205	-1.03745	-0.183853
+	2.22877	0.911076	sp|P31641|SC6A6_HUMAN	SLC6A6	Sodium- and chloride-dependent taurine transporter			n[305]EGATPYNS[167]R	Color2 [DarkGray]	1	4		6176960	-0.0930567	1.06268	-0.104047	0.863806	0.381994	0.991637
+	1.99659	0.911056	sp|Q9NQU5|PAK6_HUMAN	PAK6	Serine/threonine-protein kinase PAK 6			n[305]TWHAQISTSNLY[243]LPQDPTVAK	Color2 [DarkGray]	1	4		1.7708e+06	-2.38866	-1.07495	-1.7656	-1.29794	-1.99884	-1.04705
+	1.76328	0.910797	sp|Q07157|ZO1_HUMAN	TJP1	Tight junction protein ZO-1			n[305]HSPQQPS[167]NGSLR	Color2 [DarkGray]	1	4		3057543	-1.52431	-0.808372	-1.24964	-0.723358	-1.97351	-0.483333
+	1.84629	0.910676	sp|Q96Q15|SMG1_HUMAN	SMG1	Serine/threonine-protein kinase SMG1			n[305]T[181]QSQSIYNNLVSFASPLVTDATNECSSPTSSATYQPSFAAAVR	Color2 [DarkGray]	1	4		0	-4.40833	-3.22758	-3.81588	-3.45955	-4.18637	-2.99141
+	2.01817	0.91065	sp|Q8TBZ3|WDR20_HUMAN	WDR20	WD repeat-containing protein 20			n[305]FATLS[167]LHDR	Color2 [DarkGray]	1	4		18925890	-1.25033	0.189319	-0.714416	-0.168428	-0.890266	-0.14395
+	3.01756	0.910591	sp|P35269|T2FA_HUMAN	GTF2F1	General transcription factor IIF subunit 1			n[305]HRT[181]LTAEEAEEEWERR	Color2 [DarkGray]	1	4		16815400	0.265202	1.05034	0.124541	1.02976	0.275842	1.31726
+	2.71587	0.910288	sp|Q3KP66|INAVA_HUMAN	INAVA	Innate immunity activator protein			n[305]LRS[167]TRPHSLDR	Color2 [DarkGray]	1	4		344520	-2.71219	-1.67168	-2.45157	-1.89128	-2.73046	-1.60041
+	1.72273	0.909799	sp|Q8IWE4|DCNL3_HUMAN	DCUN1D3	DCN1-like protein 3			n[305]NGDREPS[167]NK	Color2 [DarkGray]	1	4		45063960	-0.413614	0.572414	0.0720153	0.389022	-0.631768	0.794593
+	2.44054	0.909409	sp|Q96QB1|RHG07_HUMAN	DLC1	Rho GTPase-activating protein 7			n[305]ELSSFSFS[167]MK	Color2 [DarkGray]	1	4		1.29621e+06	-2.14932	-1.40258	-2.10293	-1.44081	-2.37269	-1.05332
+	2.46034	0.909334	sp|Q8IY37|DHX37_HUMAN	DHX37	Probable ATP-dependent RNA helicase DHX37			n[305]LFYTTS[167]K	Color2 [DarkGray]	1	4		1.58791e+06	-1.40902	-0.298022	-1.3807	-0.781806	-1.42719	-0.409082
+	1.67673	0.909298	sp|P02751|FINC_HUMAN	FN1	Fibronectin			n[305]T[181]NTNVNCPIECFM[147]PLDVQADREDSRE	Color2 [DarkGray]	1	4		1018522	-2.71468	-1.36838	-2.04115	-1.36309	-2.50569	-1.80216
+	2.53448	0.90877	sp|Q9UQC2|GAB2_HUMAN	GAB2	GRB2-associated-binding protein 2			n[305]NNTVIDELPFKS[167]PITK	Color2 [DarkGray]	1	4		2.30987e+06	-2.14614	-1.45921	-2.3981	-1.52966	-2.31338	-1.14245
+	2.89515	0.90861	sp|Q9BVG8|KIFC3_HUMAN	KIFC3	Kinesin-like protein KIFC3			n[305]AHSAPSSGTS[167]SRPGS[167]IR	Color2 [DarkGray]	1	4		15557868	-0.815049	0.0214167	-0.801392	-0.0465012	-0.815229	0.319244
+	2.63602	0.908454	sp|P00533|EGFR_HUMAN	EGFR	Epidermal growth factor receptor			n[305]NGLQS[167]CPIKEDSFLQR	Color2 [DarkGray]	1	4		44962432	2.18188	3.1223	2.27581	2.9753	2.31733	3.40278
+	2.06503	0.908021	sp|P04049|RAF1_HUMAN	RAF1	RAF proto-oncogene serine/threonine-protein kinase			n[305]DAVFDGS[167]SCISPTIVQQFGYQR	Color2 [DarkGray]	1	4		0	-0.723948	-0.0397902	-0.458683	0.527462	-0.740904	0.312856
+	2.77979	0.90781	sp|Q8NI08|NCOA7_HUMAN	NCOA7	Nuclear receptor coactivator 7			n[305]KQS[167]YFAR	Color2 [DarkGray]	1	4		4.59837e+06	0.121695	1.14766	0.322185	0.912333	0.156387	1.2637
+	1.88935	0.907809	sp|Q5SW79|CE170_HUMAN	CEP170	Centrosomal protein of 170 kDa	CEP170P1	sp|Q96L14|C170L_HUMAN	n[305]RTWSRDEVMGDNLLLS[167]SVFQFSK	Color2 [DarkGray]	1	4		11242464	0.104197	1.27914	0.371645	1.29711	0.812598	1.43562
+	4.35624	0.907785	sp|P48634|PRC2A_HUMAN	PRRC2A	Protein PRRC2A			n[305]SDS[167]GGS[167]SSEPFDR	Color2 [DarkGray]	1	4		7124961	-0.155194	0.866857	-0.123948	0.775736	-0.0777712	0.72385
+	1.59911	0.907237	sp|O60716|CTND1_HUMAN	CTNND1	Catenin delta-1			n[305]Y[243]RPSMEGYR	Color2 [DarkGray]	1	4		2.42159e+06	-0.658305	-0.038969	-0.36922	0.597548	-0.381976	0.75363
+	2.43857	0.907043	sp|Q8N9B5|JMY_HUMAN	JMY	Junction-mediating and -regulatory protein			n[305]RGS[167]FHLK	Color2 [DarkGray]	1	4		32589584	-0.441142	0.726018	-0.037251	0.50425	-0.202237	0.810231
+	3.24985	0.906785	sp|Q8ND30|LIPB2_HUMAN	PPFIBP2	Liprin-beta-2			n[305]T[181]LSINEEEPEGGFSK	Color2 [DarkGray]	1	4		1.12443e+06	-1.93729	-0.874512	-1.8533	-0.924094	-1.63679	-0.90842
+	4.17733	0.906424	sp|Q8TF72|SHRM3_HUMAN	SHROOM3	Protein Shroom3			n[305]S[167]QSTFQLSSEPEREPEWR	Color2 [DarkGray]	1	4		29172048	1.92763	2.89078	2.0465	2.88464	2.0624	2.98039
+	2.03459	0.906412	sp|Q14011|CIRBP_HUMAN	CIRBP	Cold-inducible RNA-binding protein			n[305]S[167]GGYGGSRDYYSSR	Color2 [DarkGray]	1	4		16617651	0.0850096	1.23392	0.308623	0.728437	0.149823	1.30033
+	1.60706	0.906407	sp|Q9P241|AT10D_HUMAN	ATP10D	Probable phospholipid-transporting ATPase VD			n[305]SLFQRWS[167]VR	Color2 [DarkGray]	1	4		1.55711e+06	-1.36617	-0.246013	-0.844722	-0.576865	-1.18764	0.14356
+	3.44122	0.905829	sp|Q5SW79|CE170_HUMAN	CEP170	Centrosomal protein of 170 kDa	PCDHGC3, PLIN5	sp|Q00G26|PLIN5_HUMAN, sp|Q9UN70|PCDGK_HUMAN	n[305]LGS[167]LSAR	Color2 [DarkGray]	1	4		664776128	2.61147	3.62101	2.87547	3.66609	2.78457	3.70188
+	2.237	0.905307	sp|Q13017|RHG05_HUMAN	ARHGAP5	Rho GTPase-activating protein 5			n[305]IRNSFVNNTQGDEENGFSDRTS[167]K	Color2 [DarkGray]	1	4		2.76357e+06	-0.406768	0.529017	-0.0444789	0.515846	-0.310465	0.909347
+	2.29275	0.905296	sp|Q6IPR3|TYW3_HUMAN	TYW3	tRNA wybutosine-synthesizing protein 3 homolog			n[305]NNS[167]SYIHK	Color2 [DarkGray]	1	4		4.02838e+06	-0.198561	0.824197	-0.199544	0.448182	-0.069849	0.975556
+	2.31101	0.904675	sp|O43491|E41L2_HUMAN	EPB41L2	Band 4.1-like protein 2			n[305]GSQPPPAAESQSS[167]LRR	Color2 [DarkGray]	1	4		316828000	0.923667	1.98309	1.40473	2.004	1.17907	2.2344
+	2.45398	0.903999	sp|P43354|NR4A2_HUMAN	NR4A2	Nuclear receptor subfamily 4 group A member 2	NR4A1, NR4A3	sp|P22736|NR4A1_HUMAN, sp|Q92570|NR4A3_HUMAN	n[305]EVVRTDS[167]LK	Color2 [DarkGray]	1	4		5.44182e+06	0.230335	1.34189	0.331202	0.950995	0.403171	1.38382
+	2.37389	0.903744	sp|Q8NE71|ABCF1_HUMAN	ABCF1	ATP-binding cassette sub-family F member 1			n[305]ADDPYAHLS[167]K	Color2 [DarkGray]	1	4		11257284	-0.227902	0.876223	0.103281	0.572303	-0.255477	0.882607
+	3.04936	0.903674	sp|Q8NCF5|NF2IP_HUMAN	NFATC2IP	NFATC2-interacting protein			n[305]LVLDPGEAPLVPVYS[167]GK	Color2 [DarkGray]	1	4		9693339	0.528896	1.39345	0.68548	1.4024	0.344018	1.47357
+	1.47619	0.903618	sp|Q8NHU6|TDRD7_HUMAN	TDRD7	Tudor domain-containing protein 7	ADGRA3	sp|Q8IWK6|AGRA3_HUMAN	n[305]TNVHS[167]SR	Color2 [DarkGray]	1	4		576943	-2.13058	-0.903212	-1.73787	-1.60507	-2.18327	-0.832591
+	2.31849	0.903613	sp|O00622|CCN1_HUMAN	CCN1	CCN family member 1			n[305]FT[181]YAGCLSVK	Color2 [DarkGray]	1	4		3.60629e+06	-1.89948	-0.613592	-1.61293	-1.05557	-1.62958	-0.761991
+	2.05729	0.902988	sp|O60563|CCNT1_HUMAN	CCNT1	Cyclin-T1			n[305]WLSSQPS[167]FK	Color2 [DarkGray]	1	4		1.43834e+06	-2.91178	-1.77215	-2.96838	-1.77308	-2.49994	-2.12591
+	2.49161	0.902942	sp|P48960|AGRE5_HUMAN	ADGRE5	Adhesion G protein-coupled receptor E5			n[305]YSEFT[181]STTSGTGHNQTR	Color2 [DarkGray]	1	4		1815890	-1.52587	-0.930349	-1.76683	-0.906528	-1.94356	-0.690547
+	4.0249	0.902414	sp|Q9UK97|FBX9_HUMAN	FBXO9	F-box only protein 9			n[305]AARGS[167]LQK	Color2 [DarkGray]	1	4		7349256	0.782996	1.73483	0.824334	1.81801	0.928269	1.69
+	2.5836	0.902391	sp|O43663|PRC1_HUMAN	PRC1	Protein regulator of cytokinesis 1			n[305]QAFAPFCAEDY[243]TESLLQLHDAEIVR	Color2 [DarkGray]	1	4		0	-0.610178	0.552109	-0.518493	0.163905	-0.387716	0.474771
+	2.30074	0.902238	sp|Q86XR7|TCAM2_HUMAN	TICAM2	TIR domain-containing adapter molecule 2			n[305]INSCPLS[167]LSWGK	Color2 [DarkGray]	1	4		1.33259e+06	-1.61222	-0.737061	-1.6607	-1.00167	-1.61845	-0.44592
+	1.86295	0.901964	sp|P09651|ROA1_HUMAN	HNRNPA1	Heterogeneous nuclear ribonucleoprotein A1			n[305]NQGGYGGSSSSSSYGS[167]GRRF	Color2 [DarkGray]	1	4		10678975	0.647779	1.66408	0.924533	1.57826	1.09329	2.12915
+	1.3533	0.901687	sp|Q96PN7|TREF1_HUMAN	TRERF1	Transcriptional-regulating factor 1			n[305]HRPEPLFIPPPPS[167]Y[243]NPNPAASYSGATLYQSQLRSPR	Color2 [DarkGray]	1	4		2.70508e+06	-1.8285	-1.08408	-2.40808	-1.45735	-1.69779	-0.68788
+	2.62295	0.901687	sp|Q14739|LBR_HUMAN	LBR	Delta(14)-sterol reductase LBR			n[305]FSLSQESSYIAT[181]QYSLRPR	Color2 [DarkGray]	1	4		936675	-3.93997	-3.24074	-3.88449	-3.13861	-4.20935	-2.94941
+	2.55475	0.901234	sp|P48634|PRC2A_HUMAN	PRRC2A	Protein PRRC2A			n[305]LAWVGDVFT[181]ATPAEPRPLTSPLRQAADEDDK	Color2 [DarkGray]	1	4		0	0.238676	1.09235	0.327613	1.1301	-0.0898428	0.957699
+	1.78638	0.901078	sp|Q9P107|GMIP_HUMAN	GMIP	GEM-interacting protein			n[305]LCEETPITSVPRGS[167]LR	Color2 [DarkGray]	1	4		14671732	-0.0374641	1.4467	0.537815	1.09557	0.596084	1.2574
+	1.84378	0.900946	sp|Q8N5C7|DTWD1_HUMAN	DTWD1	tRNA-uridine aminocarboxypropyltransferase 1			n[305]NDDPDKPS[167]FK	Color2 [DarkGray]	1	4		2394055	0.226679	1.03662	0.0347199	0.581274	-0.105691	1.24065
+	2.23183	0.900687	sp|Q7L804|RFIP2_HUMAN	RAB11FIP2	Rab11 family-interacting protein 2			n[305]LNNGGSDSPCDLKSPNAFSENRQDY[243]FDYESTNPFTAK	Color2 [DarkGray]	1	4		6.61465e+06	-0.89205	0.315799	-0.421796	0.179424	-0.45791	0.435081
+	1.42108	0.900645	sp|Q7Z6Z7|HUWE1_HUMAN	HUWE1	E3 ubiquitin-protein ligase HUWE1			n[305]QS[167]SDFDTQSGFSINSQVFAADGASTETSASGTSQGEASTPEESR	Color2 [DarkGray]	1	4		2.78183e+06	-2.81803	-2.37897	-2.6138	-1.39639	-2.77782	-1.73236
+	1.97102	0.900535	sp|Q96GY0|ZC21A_HUMAN	ZC2HC1A	Zinc finger C2HC domain-containing protein 1A			n[305]EQAARIS[167]NK	Color2 [DarkGray]	1	4		12204517	0.290932	1.23886	0.720424	1.16908	0.0762053	1.38122
+	2.36358	0.900433	sp|P53384|NUBP1_HUMAN	NUBP1	Cytosolic Fe-S cluster assembly factor NUBP1			n[305]GAS[167]CQGCPNQR	Color2 [DarkGray]	1	4		2.18668e+06	-1.05025	-0.177059	-1.02751	-0.466986	-1.31985	-0.052269
+	2.14421	0.900348	sp|Q9BXF6|RFIP5_HUMAN	RAB11FIP5	Rab11 family-interacting protein 5			n[305]NNLSASMFDLS[167]M[147]K	Color2 [DarkGray]	1	4		2547896	-1.99907	-1.31993	-1.74012	-0.861043	-1.97924	-0.836406
+	1.74252	0.900282	sp|O43615|TIM44_HUMAN	TIMM44	Mitochondrial import inner membrane translocase subunit TIM44			n[305]Y[243]KTIESETVR	Color2 [DarkGray]	1	4		4215023	-0.243018	0.738313	0.427334	1.04946	0.077219	1.17461
+	2.24562	0.898853	sp|Q6Y7W6|GGYF2_HUMAN	GIGYF2	GRB10-interacting GYF protein 2			n[305]NNAS[167]LSK	Color2 [DarkGray]	1	4		5584464	1.01103	1.84195	1.07103	1.61744	0.795644	2.11487
+	1.85165	0.898672	sp|O43491|E41L2_HUMAN	EPB41L2	Band 4.1-like protein 2	EPB41L3	sp|Q9Y2J2|E41L3_HUMAN	n[305]FLT[181]LGSK	Color2 [DarkGray]	1	4		1.65189e+06	-0.382434	0.402206	-0.498254	0.20822	-0.299253	0.905647
+	2.20589	0.898496	sp|Q01130|SRSF2_HUMAN	SRSF2	Serine/arginine-rich splicing factor 2			n[305]YGRPPDS[167]HHSR	Color2 [DarkGray]	1	4		3980204	-1.1033	-0.405766	-1.50133	-0.292553	-0.975359	-0.18618
+	2.49842	0.897749	sp|Q8IZP0|ABI1_HUMAN	ABI1	Abl interactor 1			n[305]LGS[167]QHS[167]PGR	Color2 [DarkGray]	1	4		39469744	0.824963	1.63384	0.558716	1.34182	0.447345	1.54861
+	2.5763	0.89719	sp|Q5RL73|RBM48_HUMAN	RBM48	RNA-binding protein 48			n[305]TM[147]GHYNHNDS[167]LRK	Color2 [DarkGray]	1	4		1.7694e+06	-1.06038	-0.18301	-1.05963	-0.433615	-1.17486	0.0133238
+	3.69622	0.89716	sp|P55196|AFAD_HUMAN	AFDN	Afadin			n[305]ERADGS[167]GYGSTLPPEK	Color2 [DarkGray]	1	4		731970	-2.79476	-1.78887	-2.58633	-1.86112	-2.70807	-1.74769
+	2.97464	0.896716	sp|Q8NE01|CNNM3_HUMAN	CNNM3	Metal transporter CNNM3			n[305]T[181]T[181]TAAGSSHSRPGVPVEGSPGRNPGV	Color2 [DarkGray]	1	4		2.62221e+06	-1.84198	-1.00271	-1.72108	-0.839353	-1.6573	-0.688151
+	1.59202	0.896575	sp|O94915|FRYL_HUMAN	FRYL	Protein furry homolog-like			n[305]RPQLS[167]QR	Color2 [DarkGray]	1	4		2752659	-0.831754	0.0557404	-1.1433	-0.461975	-0.788064	0.332844
+	1.25197	0.89615	sp|Q96TA1|NIBA2_HUMAN	NIBAN2	Protein Niban 2			n[305]QVVS[167]VVQDEEVGLPFEASPESPPPAS[167]PDGVTEIR	Color2 [DarkGray]	1	4		0	-2.37216	-1.45823	-1.75987	-0.611645	-1.62331	-0.997006
+	1.81441	0.896046	sp|P61006|RAB8A_HUMAN	RAB8A	Ras-related protein Rab-8A	RAB8B	sp|Q92930|RAB8B_HUMAN	n[305]FRT[181]ITTAYYR	Color2 [DarkGray]	1	4		19391198	-0.905531	-0.18115	-0.807953	-0.321368	-1.1579	0.319273
+	1.49574	0.895854	sp|Q9Y4K1|CRBG1_HUMAN	CRYBG1	Beta/gamma crystallin domain-containing protein 1			n[305]STDSPGADAELPES[167]AARDDAVFDDEVAPNAASDNASAEK	Color2 [DarkGray]	1	4		7965935	0.0587015	1.22637	-0.223858	0.963394	0.673851	1.00649
+	2.10333	0.895703	sp|Q8NFM7|I17RD_HUMAN	IL17RD	Interleukin-17 receptor D			n[305]LLS[167]SGSCK	Color2 [DarkGray]	1	4		1.91952e+06	-2.62534	-1.32697	-2.07153	-1.4329	-2.10696	-1.35686
+	3.27402	0.8956	sp|Q5JTV8|TOIP1_HUMAN	TOR1AIP1	Torsin-1A-interacting protein 1			n[305]QPS[167]VLSSGYQK	Color2 [DarkGray]	1	4		9938792	-0.00671291	1.05215	0.1587	0.833602	0.104064	1.0571
+	2.39224	0.89548	sp|Q5VWQ8|DAB2P_HUMAN	DAB2IP	Disabled homolog 2-interacting protein			n[305]QNS[167]AGPQR	Color2 [DarkGray]	1	4		10309928	0.60097	1.33418	0.617189	1.26331	0.37334	1.68044
+	1.55386	0.894977	sp|P27816|MAP4_HUMAN	MAP4	Microtubule-associated protein 4			n[305]STSTS[167]SM[147]K	Color2 [DarkGray]	1	4		2.43901e+06	-0.844028	0.43821	-0.389836	0.0493984	-0.244151	0.719308
+	3.56306	0.894868	sp|Q9Y2J4|AMOL2_HUMAN	AMOTL2	Angiomotin-like protein 2			n[305]HGHVRS[167]LS[167]ER	Color2 [DarkGray]	1	4		55887564	2.20406	3.27553	2.41599	3.23346	2.42738	3.22303
+	1.5163	0.894845	sp|P02686|MBP_HUMAN	MBP	Myelin basic protein			n[305]DRPSESDELQTIQEDSAATSESLDVMAS[167]QK	Color2 [DarkGray]	1	4		4.02732e+06	-0.959748	0.291159	-0.0988545	0.476424	-0.294369	0.563982
+	3.3465	0.894763	sp|P27816|MAP4_HUMAN	MAP4	Microtubule-associated protein 4			n[305]SPST[181]LLPK	Color2 [DarkGray]	1	4		2.81437e+06	-1.67979	-0.665067	-1.65292	-0.789699	-1.74716	-0.940811
+	2.34916	0.894382	sp|Q9Y3M8|STA13_HUMAN	STARD13	StAR-related lipid transfer protein 13	WDFY4	sp|Q6ZS81|WDFY4_HUMAN	n[305]LM[147]AS[167]CHR	Color2 [DarkGray]	1	4		1.1298e+06	-3.16946	-2.37338	-2.8685	-2.14871	-3.10836	-1.94108
+	2.4012	0.894133	sp|Q9NR48|ASH1L_HUMAN	ASH1L	Histone-lysine N-methyltransferase ASH1L			n[305]TLFIPENS[167]FRK	Color2 [DarkGray]	1	4		1.38456e+06	-1.30898	-0.418988	-0.966476	-0.364594	-1.27852	-0.0879908
+	4.05435	0.894114	sp|P53367|ARFP1_HUMAN	ARFIP1	Arfaptin-1			n[305]WS[167]LNTYK	Color2 [DarkGray]	1	4		3.47076e+06	-0.735716	0.120079	-0.630341	0.267776	-0.67766	0.250771
+	2.2251	0.893769	sp|Q9HC44|GPBL1_HUMAN	GPBP1L1	Vasculin-like protein 1			n[305]HWNGS[167]FHSR	Color2 [DarkGray]	1	4		10110572	1.07146	1.83387	1.11167	1.68366	0.708735	2.05564
+	2.60806	0.893331	sp|O94885|SASH1_HUMAN	SASH1	SAM and SH3 domain-containing protein 1			n[305]LVNS[167]TRR	Color2 [DarkGray]	1	4		13559562	1.40854	2.30742	1.29097	1.96898	1.26424	2.36735
+	2.14336	0.892994	sp|Q5SW96|ARH_HUMAN	LDLRAP1	Low density lipoprotein receptor adapter protein 1			n[305]QS[167]WGGGGR	Color2 [DarkGray]	1	4		5307831	-0.410348	0.502183	-0.368212	0.140768	-0.536662	0.720808
+	1.92049	0.892965	sp|O95425|SVIL_HUMAN	SVIL	Supervillin			n[305]TKPPLDHNAS[167]ATDYK	Color2 [DarkGray]	1	4		40478420	1.59076	1.99474	1.30905	2.19989	0.997547	2.38162
+	1.81275	0.892146	sp|P15529|MCP_HUMAN	CD46	Membrane cofactor protein			n[305]KGT[181]YLTDETHR	Color2 [DarkGray]	1	4		3838579	-1.63461	-0.570909	-1.611	-0.958834	-1.27617	-0.3156
+	1.39395	0.891591	sp|Q96AP7|ESAM_HUMAN	ESAM	Endothelial cell-selective adhesion molecule			n[305]SS[167]DTISK	Color2 [DarkGray]	1	4		9611488	0.0762758	0.999951	0.487279	0.655161	-0.0841484	1.49907
+	3.18277	0.891576	sp|O00571|DDX3X_HUMAN	DDX3X	ATP-dependent RNA helicase DDX3X	DDX3Y	sp|O15523|DDX3Y_HUMAN	n[305]DAY[243]SSFGSR	Color2 [DarkGray]	1	4		40355524	2.74159	3.70077	2.99599	3.71141	2.87585	3.87596
+	1.45421	0.891447	sp|Q9UNY4|TTF2_HUMAN	TTF2	Transcription termination factor 2			n[305]SQQCQGNELTRPS[167]ASSQEK	Color2 [DarkGray]	1	4		1.11268e+06	-1.76432	-0.162593	-1.27577	-0.95324	-1.58587	-0.835788
+	3.21534	0.891321	sp|Q04724|TLE1_HUMAN	TLE1	Transducin-like enhancer protein 1			n[305]EMS[167]LHEK	Color2 [DarkGray]	1	4		6778015	0.366422	1.28627	0.223012	1.05476	0.365855	1.28821
+	2.76975	0.89107	sp|P48634|PRC2A_HUMAN	PRRC2A	Protein PRRC2A			n[305]S[167]DSGGS[167]SSEPFDR	Color2 [DarkGray]	1	4		7232051	0.259034	1.30323	0.130581	1.00725	0.416425	1.16877
+	2.40192	0.890641	sp|P35222|CTNB1_HUMAN	CTNNB1	Catenin beta-1			n[305]AAVM[147]VHQLS[167]K	Color2 [DarkGray]	1	4		4498257	-0.831815	-0.0151882	-0.695927	-0.123673	-1.00993	0.273114
+	2.4392	0.889433	sp|O43719|HTSF1_HUMAN	HTATSF1	HIV Tat-specific factor 1			n[305]GEYDAS[167]K	Color2 [DarkGray]	1	4		7.11705e+06	-0.48017	0.655068	-0.187139	0.338598	-0.288435	0.718889
+	2.21522	0.889225	sp|P51587|BRCA2_HUMAN	BRCA2	Breast cancer type 2 susceptibility protein			n[305]T[181]SGNSFK	Color2 [DarkGray]	1	4		2.53627e+06	-0.498934	0.481319	-0.330794	0.133411	-0.575947	0.647268
+	2.34392	0.887932	sp|O60503|ADCY9_HUMAN	ADCY9	Adenylate cyclase type 9			n[305]SEAGAEGGAPQNGCQDEHKNS[167]TK	Color2 [DarkGray]	1	4		1.32929e+06	-1.66001	-0.842158	-1.55922	-0.993815	-1.81408	-0.53354
+	3.39779	0.887081	sp|Q86W92|LIPB1_HUMAN	PPFIBP1	Liprin-beta-1			n[305]VRSS[167]FGR	Color2 [DarkGray]	1	4		45262000	0.378954	1.35278	0.646496	1.37891	0.467522	1.42252
+	2.82229	0.887023	sp|Q96S65|CSRN1_HUMAN	CSRNP1	Cysteine/serine-rich nuclear protein 1			n[305]SCS[167]PSSSVSR	Color2 [DarkGray]	1	4		9600685	-0.320424	0.86264	-0.18355	0.608179	-0.17371	0.512565
+	2.50251	0.88681	sp|A6H8Y1|BDP1_HUMAN	BDP1	Transcription factor TFIIIB component B'' homolog			n[305]RIS[167]STSSLVK	Color2 [DarkGray]	1	4		9181980	-0.871835	0.0214901	-0.677026	-0.0448494	-0.767776	0.367151
+	2.73162	0.886765	sp|Q13415|ORC1_HUMAN	ORC1	Origin recognition complex subunit 1			n[305]NLRSS[167]LK	Color2 [DarkGray]	1	4		27006012	1.60333	2.61702	1.68763	2.27919	1.58774	2.64279
+	2.59813	0.886574	sp|Q8N5U6|RNF10_HUMAN	RNF10	RING finger protein 10			n[305]LFS[167]SSFNGGRR	Color2 [DarkGray]	1	4		5.31575e+06	-0.477192	0.668749	-0.339292	0.244937	-0.392606	0.536947
+	1.87238	0.886556	sp|Q7Z333|SETX_HUMAN	SETX	Probable helicase senataxin			n[305]ATTVS[167]QKK	Color2 [DarkGray]	1	4		5587480	-1.22248	-0.404215	-1.25877	-0.786327	-1.49326	-0.124289
+	2.3106	0.886183	sp|P49795|RGS19_HUMAN	RGS19	Regulator of G-protein signaling 19			n[305]AWQASRES[167]K	Color2 [DarkGray]	1	4		87662784	1.68993	2.89915	2.08567	2.65538	2.06704	2.94666
+	2.31445	0.885599	sp|Q6GQQ9|OTU7B_HUMAN	OTUD7B	OTU domain-containing protein 7B	OTUD7A	sp|Q8TE49|OTU7A_HUMAN	n[305]RADS[167]VANK	Color2 [DarkGray]	1	4		18866532	1.29413	2.2719	1.74593	2.3434	1.47636	2.55792
+	2.02108	0.885376	sp|Q96RE7|NACC1_HUMAN	NACC1	Nucleus accumbens-associated protein 1			n[305]NT[181]LANSCGTGIRSSTNDPR	Color2 [DarkGray]	1	4		2.91935e+06	-1.37331	-0.326783	-1.32387	-0.853842	-1.39645	-0.256875
+	1.96895	0.88464	sp|Q09666|AHNK_HUMAN	AHNAK	Neuroblast differentiation-associated protein AHNAK			n[305]GPSLDIDT[181]PDVNIEGPEGK	Color2 [DarkGray]	1	4		8225804	-2.03831	-1.04616	-2.29914	-1.35628	-1.73439	-1.01549
+	1.58985	0.884482	sp|Q07666|KHDR1_HUMAN	KHDRBS1	KH domain-containing, RNA-binding, signal transduction-associated protein 1			n[305]DDPAARM[147]S[167]R	Color2 [DarkGray]	1	4		6.24036e+06	-0.337441	0.524106	-0.167423	0.236639	-0.299866	1.08797
+	1.85484	0.884038	sp|Q96D31|CRCM1_HUMAN	ORAI1	Calcium release-activated calcium channel protein 1			n[305]LQDQLDHRGDHPLTPGS[167]HYA	Color2 [DarkGray]	1	4		5910877	-2.32397	-1.56667	-2.23356	-1.50285	-2.09766	-0.933558
+	2.45034	0.883125	sp|Q9H2G2|SLK_HUMAN	SLK	STE20-like serine/threonine-protein kinase			n[305]DS[167]GSISLQETRR	Color2 [DarkGray]	1	4		4253372	-0.1512	0.504063	-0.134335	0.583575	-0.379315	0.896886
+	3.68001	0.883038	sp|Q86W56|PARG_HUMAN	PARG	Poly(ADP-ribose) glycohydrolase			n[305]LENVS[167]QLSLDKS[167]PTEK	Color2 [DarkGray]	1	4		17077722	2.14349	2.98531	2.21547	2.95806	2.06155	3.12625
+	1.44901	0.882778	sp|Q9BU23|LMF2_HUMAN	LMF2	Lipase maturation factor 2			n[305]DSGAASEQATAAPNPCSSSS[167]RTTR	Color2 [DarkGray]	1	4		4.9774e+06	-0.729696	0.293999	-0.121202	0.0654888	-0.672443	0.765505
+	2.50806	0.882494	sp|P00533|EGFR_HUMAN	EGFR	Epidermal growth factor receptor			n[305]NGLQSCPIKEDS[167]FLQR	Color2 [DarkGray]	1	4		10125495	0.373507	1.44443	0.702873	1.37057	0.726003	1.63487
+	1.7125	0.88237	sp|P23443|KS6B1_HUMAN	RPS6KB1	Ribosomal protein S6 kinase beta-1			n[305]FS[167]PGDFWGR	Color2 [DarkGray]	1	4		0	-0.975276	0.462577	-0.4613	0.367989	-0.362163	0.017807
+	1.65707	0.882348	sp|Q9BX69|CARD6_HUMAN	CARD6	Caspase recruitment domain-containing protein 6			n[305]IGGNFNHVS[167]LK	Color2 [DarkGray]	1	4		16927750	-1.78886	-0.498185	-1.09562	-0.854901	-1.53772	-0.422077
+	1.84026	0.882301	sp|O14908|GIPC1_HUMAN	GIPC1	PDZ domain-containing protein GIPC1			n[305]S[167]AGGRPGSGPQLGTGRGTLR	Color2 [DarkGray]	1	4		12220845	-0.00223446	1.13693	0.544231	0.975842	0.374863	1.451
+	3.30721	0.882286	sp|P23193|TCEA1_HUMAN	TCEA1	Transcription elongation factor A protein 1			n[305]KKEPAIT[181]S[167]QNSPEAR	Color2 [DarkGray]	1	4		5.16444e+06	-0.0440226	0.731906	-0.228853	0.605899	-0.277369	0.758808
+	3.2735	0.882235	sp|O15085|ARHGB_HUMAN	ARHGEF11	Rho guanine nucleotide exchange factor 11			n[305]NIIQHFENNQQY[243]DAPEPGTQRLSTGS[167]FPEDLLESDSSR	Color2 [DarkGray]	1	4		5657078	-1.52255	-0.766465	-1.53488	-0.646741	-1.47571	-0.473221
+	2.4659	0.882094	sp|Q7Z7A4|PXK_HUMAN	PXK	PX domain-containing protein kinase-like protein			n[305]AQS[167]HHGSEEER	Color2 [DarkGray]	1	4		7959578	-1.2136	-0.0627108	-1.21466	-0.415488	-0.917631	-0.221411
+	1.96004	0.881924	sp|O75179|ANR17_HUMAN	ANKRD17	Ankyrin repeat domain-containing protein 17			n[305]RNNTITTT[181]SSK	Color2 [DarkGray]	1	4		1.62907e+06	-1.26669	-0.112829	-1.1769	-0.693451	-1.12776	-0.1193
+	1.39855	0.881816	sp|P51991|ROA3_HUMAN	HNRNPA3	Heterogeneous nuclear ribonucleoprotein A3			n[305]SSGSPYGGGYGSGGGSGGY[243]GSRRF	Color2 [DarkGray]	1	4		10191925	1.12714	2.22817	1.74905	1.85337	1.145	2.5851
+	3.08216	0.881709	sp|Q8IW35|CEP97_HUMAN	CEP97	Centrosomal protein of 97 kDa			n[305]HPLFTQSQESS[167]CDQNADWFIASDVAPQEK	Color2 [DarkGray]	1	4		1.50224e+06	-1.81034	-0.686335	-1.74421	-0.962708	-1.63732	-0.897704
+	2.17055	0.880584	sp|O43290|SNUT1_HUMAN	SART1	U4/U6.U5 tri-snRNP-associated protein 1			n[305]FHGKGS[167]GK	Color2 [DarkGray]	1	4		33000038	0.874795	1.86522	1.20026	1.65184	0.930657	2.1304
+	1.89245	0.879926	sp|P05787|K2C8_HUMAN	KRT8	Keratin, type II cytoskeletal 8			n[305]T[181]SS[167]SRAVVVK	Color2 [DarkGray]	1	4		17321014	0.575926	1.77776	1.08838	1.52506	0.984386	1.98565
+	2.26139	0.879704	sp|Q5VWQ8|DAB2P_HUMAN	DAB2IP	Disabled homolog 2-interacting protein			n[305]QNS[167]AGPQRR	Color2 [DarkGray]	1	4		4142009	-1.38119	-0.708323	-1.82488	-0.910839	-1.62769	-0.575488
+	2.67494	0.879591	sp|Q9Y2E4|DIP2C_HUMAN	DIP2C	Disco-interacting protein 2 homolog C			n[305]YRSDVHT[181]EAVQAALAK	Color2 [DarkGray]	1	4		36934384	0.821548	1.96429	1.19616	1.79316	0.91768	1.81671
+	2.60874	0.879182	sp|P98172|EFNB1_HUMAN	EFNB1	Ephrin-B1			n[305]AAALSLS[167]TLASPK	Color2 [DarkGray]	1	4		6253501	-2.06135	-1.38	-2.20311	-1.41776	-2.491	-1.32014
+	3.44196	0.879042	sp|O94915|FRYL_HUMAN	FRYL	Protein furry homolog-like			n[305]LES[167]RYSSSSGGSYEEEK	Color2 [DarkGray]	1	4		9393504	0.869998	1.62836	0.602645	1.59616	0.709552	1.5948
+	2.87304	0.878407	sp|O95819|M4K4_HUMAN	MAP4K4	Mitogen-activated protein kinase kinase kinase kinase 4			n[305]SKPS[167]FHAPEPK	Color2 [DarkGray]	1	4		6667115	-0.368752	0.401327	-0.339105	0.361651	-0.480857	0.683529
+	3.16593	0.878354	sp|Q9NZJ0|DTL_HUMAN	DTL	Denticleless protein homolog			n[305]SPSSQTPNS[167]R	Color2 [DarkGray]	1	4		1.23114e+06	-1.37632	-0.582254	-1.66778	-0.713727	-1.53167	-0.644729
+	2.11263	0.877927	sp|P14316|IRF2_HUMAN	IRF2	Interferon regulatory factor 2			n[305]MLPLSERPS[167]KK	Color2 [DarkGray]	1	4		2863100	-0.978763	0.211608	-0.398774	0.116897	-0.625247	0.302494
+	1.45972	0.877887	sp|O95425|SVIL_HUMAN	SVIL	Supervillin			n[305]FS[167]SSIENSDSPVR	Color2 [DarkGray]	1	4		83828336	1.2297	1.46196	1.13947	2.31116	1.0081	2.23781
+	2.34731	0.877145	sp|Q9P031|TAP26_HUMAN	CCDC59	Thyroid transcription factor 1-associated protein 26			n[305]T[181]WRPNHPQAFVGSVR	Color2 [DarkGray]	1	4		4226045	0.0488558	1.19275	0.107069	0.694093	0.157254	1.05778
+	2.16379	0.876599	sp|O00622|CCN1_HUMAN	CCN1	CCN family member 1			n[305]FTYAGCLS[167]VKK	Color2 [DarkGray]	1	4		2.48864e+06	-0.444597	0.665863	-0.0356011	0.500973	-0.548508	0.434256
+	1.71844	0.876557	sp|Q8IUW5|RELL1_HUMAN	RELL1	RELT-like protein 1			n[305]RQGEVT[181]VLSVGR	Color2 [DarkGray]	1	4		4575463	-1.89511	-0.870564	-1.71176	-1.04934	-1.39202	-0.449319
+	2.50038	0.876519	sp|Q6KC79|NIPBL_HUMAN	NIPBL	Nipped-B-like protein			n[305]LS[167]SDDGDSSTMR	Color2 [DarkGray]	1	4		6.01115e+06	0.659993	1.73045	0.627186	1.49125	0.992958	1.68799
+	1.73226	0.876487	sp|P17096|HMGA1_HUMAN	HMGA1	High mobility group protein HMG-I/HMG-Y			n[305]KQPPVSPGTALVGS[167]QKEPSEVPTPK	Color2 [DarkGray]	1	4		422947872	4.44974	5.86901	5.03424	5.48689	5.04124	5.79877
+	1.28169	0.876268	sp|P46821|MAP1B_HUMAN	MAP1B	Microtubule-associated protein 1B			n[305]DVM[147]SDETNNEET[181]ESPSQEFVNITK	Color2 [DarkGray]	1	4		11494750	0.0676498	1.28281	0.307414	1.58284	1.05865	1.19688
+	1.62825	0.876181	sp|P39019|RS19_HUMAN	RPS19	40S ribosomal protein S19			n[305]NGVM[147]PSHFS[167]R	Color2 [DarkGray]	1	4		3.15782e+06	-0.550777	0.471086	-0.571843	-0.170904	-0.570969	0.634772
+	1.54058	0.875763	sp|Q2M389|WASC4_HUMAN	WASHC4	WASH complex subunit 4			n[305]QQNVQSAS[167]QDEK	Color2 [DarkGray]	1	4		1.38642e+06	-1.52201	-0.0440569	-1.20267	-0.852323	-1.15442	-0.355436
+	2.5336	0.87524	sp|Q99590|SCAFB_HUMAN	SCAF11	Protein SCAF11			n[305]FHS[167]PSTTWSPNK	Color2 [DarkGray]	1	4		4464857	-0.594872	0.470603	-0.327347	0.17548	-0.534654	0.522765
+	2.41439	0.875177	sp|Q9NZN8|CNOT2_HUMAN	CNOT2	CCR4-NOT transcription complex subunit 2			n[305]T[181]NSMSSSGLGSPNR	Color2 [DarkGray]	1	4		10642818	-0.419772	0.690771	-0.259535	0.253467	-0.364516	0.637468
+	2.37992	0.874746	sp|O14974|MYPT1_HUMAN	PPP1R12A	Protein phosphatase 1 regulatory subunit 12A			n[305]YET[181]SSTSAGDRYDSLLGR	Color2 [DarkGray]	1	4		31081948	1.71814	2.57088	1.3903	2.19499	1.52249	2.4893
+	1.75111	0.874711	sp|Q9Y4F1|FARP1_HUMAN	FARP1	FERM, ARHGEF and pleckstrin domain-containing protein 1			n[305]SLASQPTELNSEVLEQSQQST[181]SLTFGEGAESPGGQSCRR	Color2 [DarkGray]	1	4		3795140	-2.84768	-2.28182	-2.8499	-2.18625	-2.96963	-1.575
+	2.03787	0.874607	sp|P18615|NELFE_HUMAN	NELFE	Negative elongation factor E			n[305]RS[167]LSEQPVMDTATATEQAK	Color2 [DarkGray]	1	4		106397440	1.32924	2.47831	1.56233	1.95946	1.19384	2.27147
+	1.92996	0.874444	sp|Q15418|KS6A1_HUMAN	RPS6KA1	Ribosomal protein S6 kinase alpha-1			n[305]GFS[167]FVATGLMEDDGKPRAPQAPLHSVVQQLHGK	Color2 [DarkGray]	1	4		2.80455e+06	-1.90532	-1.36494	-1.82944	-1.07882	-2.04507	-0.712739
+	2.1919	0.874339	sp|O43159|RRP8_HUMAN	RRP8	Ribosomal RNA-processing protein 8			n[305]KASFAS[167]AS[167]AEVGKK	Color2 [DarkGray]	1	4		1.86258e+06	-0.101993	0.666493	-0.424839	0.340289	-0.570498	0.518906
+	2.9121	0.874317	sp|Q14469|HES1_HUMAN	HES1	Transcription factor HES-1			n[305]NS[167]S[167]SPVAATPASVNTTPDKPK	Color2 [DarkGray]	1	4		1.65985e+06	-2.43742	-1.45718	-2.19674	-1.27483	-2.26626	-1.54547
+	2.57751	0.873698	sp|Q8TF72|SHRM3_HUMAN	SHROOM3	Protein Shroom3			n[305]DRSS[167]SFAGGRR	Color2 [DarkGray]	1	4		3.57741e+06	-1.11296	-0.41111	-1.13179	-0.383107	-1.1791	-0.00854969
+	3.34977	0.873256	sp|P14921|ETS1_HUMAN	ETS1	Protein C-ets-1			n[305]VDLELFPSPDM[147]ECADVPLLT[181]PSSK	Color2 [DarkGray]	1	4		7.69583e+06	0.857852	1.5227	0.703978	1.64688	0.747546	1.75957
+	2.37535	0.872905	sp|Q5SW79|CE170_HUMAN	CEP170	Centrosomal protein of 170 kDa			n[305]LGS[167]LSARS[167]DSEATISR	Color2 [DarkGray]	1	4		56399348	2.37974	2.94042	2.37831	3.41998	2.22919	3.24554
+	2.54514	0.872832	sp|Q8IY92|SLX4_HUMAN	SLX4	Structure-specific endonuclease subunit SLX4			n[305]FLLGPPQGGS[167]PR	Color2 [DarkGray]	1	4		3257601	-4.15106	-3.09157	-3.8798	-3.10202	-4.16622	-3.385
+	3.49905	0.872776	sp|P29375|KDM5A_HUMAN	KDM5A	Lysine-specific demethylase 5A			n[305]TQS[167]ESGDVSR	Color2 [DarkGray]	1	4		2.27595e+06	-1.21637	-0.280957	-1.22804	-0.257995	-0.997883	-0.285014
+	2.58667	0.872336	sp|Q04637|IF4G1_HUMAN	EIF4G1	Eukaryotic translation initiation factor 4 gamma 1	TNIK	sp|Q9UKE5|TNIK_HUMAN	n[305]EVEERS[167]R	Color2 [DarkGray]	1	4		201618592	0.304164	1.42866	0.520074	1.45407	0.590094	1.14861
+	1.78401	0.872234	sp|Q09666|AHNK_HUMAN	AHNAK	Neuroblast differentiation-associated protein AHNAK			n[305]FSMPS[167]LK	Color2 [DarkGray]	1	4		7.7581e+06	-0.479129	0.578971	-0.0315843	0.361361	-0.201259	0.964397
+	1.38237	0.872108	sp|P38935|SMBP2_HUMAN	IGHMBP2	DNA-binding protein SMUBP-2			n[305]T[181]GSQRQEGGQEAAAPAR	Color2 [DarkGray]	1	4		6.89568e+06	-1.70243	-0.596102	-2.07256	-0.803737	-1.10034	-0.859168
+	1.77053	0.872081	sp|Q92616|GCN1_HUMAN	GCN1	eIF-2-alpha kinase activator GCN1			n[305]VTTAS[167]VK	Color2 [DarkGray]	1	4		16199109	2.07713	2.82033	1.94957	2.44957	1.78481	3.15785
+	2.01167	0.871637	sp|O95210|STBD1_HUMAN	STBD1	Starch-binding domain-containing protein 1			n[305]LQAAS[167]WR	Color2 [DarkGray]	1	4		3.996e+06	-0.320384	0.681038	-0.0367837	0.426974	-0.140296	1.00943
+	2.00583	0.871462	sp|P18615|NELFE_HUMAN	NELFE	Negative elongation factor E			n[305]RS[167]LSEQPVM[147]DTATATEQAK	Color2 [DarkGray]	1	4		25618636	0.437629	1.80672	0.940599	1.42527	0.711959	1.47258
+	2.09066	0.871256	sp|O14745|NHRF1_HUMAN	SLC9A3R1	Na(+)/H(+) exchange regulatory cofactor NHE-RF1			n[305]RAPQMDWS[167]K	Color2 [DarkGray]	1	4		2.95503e+06	-0.581717	0.381008	-0.212122	0.20971	-0.572175	0.657036
+	3.34629	0.87017	sp|Q92597|NDRG1_HUMAN	NDRG1	Protein NDRG1			n[305]T[181]ASGS[167]SVTSLDGTR	Color2 [DarkGray]	1	4		10754399	-0.291705	0.490082	-0.196499	0.685384	-0.39852	0.548321
+	2.391	0.869554	sp|Q9UPT5|EXOC7_HUMAN	EXOC7	Exocyst complex component 7			n[305]QYS[167]QHGLDGK	Color2 [DarkGray]	1	4		6.89782e+06	0.757437	1.9952	1.1755	1.76787	1.12034	1.89887
+	1.67283	0.869163	sp|Q9UPN7|PP6R1_HUMAN	PPP6R1	Serine/threonine-protein phosphatase 6 regulatory subunit 1			n[305]DALQLRS[167]QDPTPPSAPQEATEGSK	Color2 [DarkGray]	1	4		2764680	-2.08244	-0.641849	-1.51681	-1.16701	-1.59819	-0.781095
+	1.2776	0.869106	sp|Q05D32|CTSL2_HUMAN	CTDSPL2	CTD small phosphatase-like protein 2			n[305]ASQQSNQIQT[181]QRTAR	Color2 [DarkGray]	1	4		848167	-2.88883	-1.40891	-1.80169	-1.59419	-2.35923	-1.43933
+	1.62061	0.868844	sp|P78344|IF4G2_HUMAN	EIF4G2	Eukaryotic translation initiation factor 4 gamma 2			n[305]SQGLSQLYHNQSQGLLS[167]QLQGQSK	Color2 [DarkGray]	1	4		1.3175e+06	-2.36917	-1.47978	-2.50762	-2.00435	-2.3917	-1.17782
+	2.16553	0.868679	sp|Q09666|AHNK_HUMAN	AHNAK	Neuroblast differentiation-associated protein AHNAK			n[305]EFSGPSTPT[181]GTLEFEGGEVSLEGGK	Color2 [DarkGray]	1	4		20747774	-0.199491	0.788606	-0.117541	0.559824	0.10989	1.05046
+	2.48721	0.868598	sp|Q14004|CDK13_HUMAN	CDK13	Cyclin-dependent kinase 13			n[305]RGEGS[167]ERRPR	Color2 [DarkGray]	1	4		6.84692e+06	0.114605	0.953924	0.182711	0.873921	0.233556	1.30882
+	2.45175	0.86848	sp|Q15650|TRIP4_HUMAN	TRIP4	Activating signal cointegrator 1			n[305]LLEFDRTS[167]IRR	Color2 [DarkGray]	1	4		23982606	-0.146212	0.435989	-0.480408	0.397217	-0.583804	0.561809
+	1.29899	0.868252	sp|Q53GS9|SNUT2_HUMAN	USP39	U4/U6.U5 tri-snRNP-associated protein 2			n[305]RES[167]RGSTR	Color2 [DarkGray]	1	4		18317876	-1.10565	-0.202699	-0.733066	-0.634481	-1.34525	0.257972
+	2.02665	0.868119	sp|Q05682|CALD1_HUMAN	CALD1	Caldesmon			n[305]TPDGNKS[167]PAPKPSDLRPGDVSSK	Color2 [DarkGray]	1	4		2.40532e+06	-0.500309	0.262155	-0.480375	0.0321016	-0.957726	0.371692
+	2.41267	0.868006	sp|P35580|MYH10_HUMAN	MYH10	Myosin-10			n[305]RGGPISFSSS[167]R	Color2 [DarkGray]	1	4		63002248	-0.376862	0.41961	-0.372537	0.210234	-0.56531	0.659465
+	1.95534	0.867276	sp|Q8IZT6|ASPM_HUMAN	ASPM	Abnormal spindle-like microcephaly-associated protein			n[305]RVS[167]NIQNVNK	Color2 [DarkGray]	1	4		14005867	1.26763	2.34501	1.44274	2.43069	1.90934	2.44584
+	3.00209	0.867169	sp|P04049|RAF1_HUMAN	RAF1	RAF proto-oncogene serine/threonine-protein kinase			n[305]MRES[167]VSR	Color2 [DarkGray]	1	4		9415971	0.703197	1.68757	0.744424	1.38323	0.69707	1.6754
+	3.9905	0.86709	sp|Q9UNF1|MAGD2_HUMAN	MAGED2	Melanoma-associated antigen D2			n[305]FQAEAS[167]EK	Color2 [DarkGray]	1	4		6370249	-0.404179	0.318567	-0.524825	0.369557	-0.547987	0.436156
+	2.44407	0.866453	sp|Q8TF01|PNISR_HUMAN	PNISR	Arginine/serine-rich protein PNISR			n[305]ERPS[167]SFRDR	Color2 [DarkGray]	1	4		286386592	0.897895	2.04772	1.17482	1.75176	1.20024	2.07284
+	2.81493	0.866266	sp|P26006|ITA3_HUMAN	ITGA3	Integrin alpha-3			n[305]SQPS[167]ETER	Color2 [DarkGray]	1	4		31489296	-0.818624	-0.0187731	-1.00474	-0.248345	-0.961831	0.0807228
+	2.52281	0.866127	sp|Q92833|JARD2_HUMAN	JARID2	Protein Jumonji			n[305]EGLRNS[167]K	Color2 [DarkGray]	1	4		6686370	0.483068	1.50192	0.615508	1.18819	0.607784	1.61463
+	2.07541	0.866022	sp|Q68DA7|FMN1_HUMAN	FMN1	Formin-1			n[305]INPTAS[167]LK	Color2 [DarkGray]	1	4		6.30872e+06	-0.533912	0.640356	-0.157876	0.343968	-0.150353	0.771601
+	3.16794	0.865783	sp|Q14152|EIF3A_HUMAN	EIF3A	Eukaryotic translation initiation factor 3 subunit A			n[305]LGDS[167]SLSR	Color2 [DarkGray]	1	4		42265396	0.725686	1.58224	0.629322	1.68519	0.7066	1.39153
+	1.40921	0.864822	sp|Q86WR7|PRSR2_HUMAN	PROSER2	Proline and serine-rich protein 2			n[305]PVT[181]HRKSDASDMNSDTS[167]PSCR	Color2 [DarkGray]	1	4		5513883	-2.83885	-1.58087	-2.14592	-1.45461	-1.93439	-1.28921
+	1.95737	0.864577	sp|Q96AT1|K1143_HUMAN	KIAA1143	Uncharacterized protein KIAA1143			n[305]YSGLTASS[167]K	Color2 [DarkGray]	1	4		21609172	-1.1093	-0.225769	-1.18922	-0.403253	-0.804445	0.119784
+	2.99539	0.864504	sp|P52292|IMA1_HUMAN	KPNA2	Importin subunit alpha-1			n[305]GKDS[167]TEM[147]R	Color2 [DarkGray]	1	4		30553312	1.98202	2.60747	1.92341	2.85156	1.75276	2.79267
+	2.89016	0.86379	sp|Q9BRD0|BUD13_HUMAN	BUD13	BUD13 homolog			n[305]QMEAFRSS[167]AK	Color2 [DarkGray]	1	4		5.66956e+06	0.331798	1.34062	0.330673	0.985622	0.32981	1.25741
+	3.0659	0.86289	sp|P30533|AMRP_HUMAN	LRPAP1	Alpha-2-macroglobulin receptor-associated protein			n[305]HAES[167]VGDGER	Color2 [DarkGray]	1	4		10783599	-0.121071	0.55833	-0.176425	0.81322	-0.311436	0.608188
+	2.11744	0.862809	sp|Q96GA3|LTV1_HUMAN	LTV1	Protein LTV1 homolog			n[305]EKWDCES[167]ICS[167]TYSNLYNHPQLIK	Color2 [DarkGray]	1	4		5994433	0.728298	1.77801	1.24511	1.83483	1.09487	2.04387
+	1.61574	0.862789	sp|Q8TAP6|CEP76_HUMAN	CEP76	Centrosomal protein of 76 kDa			n[305]QLIHQQLS[167]K	Color2 [DarkGray]	1	4		2.26164e+06	-1.01693	-0.0802517	-0.894855	-0.42348	-0.791164	0.389153
+	2.57477	0.862465	sp|Q9Y4H2|IRS2_HUMAN	IRS2	Insulin receptor substrate 2			n[305]SRTDS[167]LAATPPAAK	Color2 [DarkGray]	1	4		7.22652e+06	-0.869631	0.189526	-0.614024	0.194122	-0.435322	0.284772
+	2.08854	0.862441	sp|Q96CP6|ASTRA_HUMAN	GRAMD1A	Protein Aster-A			n[305]STPSSSPS[167]LRK	Color2 [DarkGray]	1	4		6.23395e+06	-0.566012	0.618548	0.00233984	0.457997	-0.270032	0.677072
+	1.93729	0.862399	sp|O95067|CCNB2_HUMAN	CCNB2	G2/mitotic-specific cyclin-B2			n[305]QLKPT[181]ASVKPVQM[147]EK	Color2 [DarkGray]	1	4		2450192	0.33933	1.57742	0.840685	1.19444	0.601972	1.59733
+	2.07374	0.861763	sp|O95359|TACC2_HUMAN	TACC2	Transforming acidic coiled-coil-containing protein 2	IQCE	sp|Q6IPM2|IQCE_HUMAN	n[305]T[181]DTFRVK	Color2 [DarkGray]	1	4		7.71493e+06	0.489898	1.33968	0.889171	1.41241	0.536917	1.74919
+	3.51333	0.861683	sp|Q68EM7|RHG17_HUMAN	ARHGAP17	Rho GTPase-activating protein 17			n[305]KES[167]FGVK	Color2 [DarkGray]	1	4		16898926	-0.717032	0.0514956	-0.820224	0.00514984	-0.76452	0.226627
+	1.55403	0.861424	sp|Q9UBP9|GULP1_HUMAN	GULP1	PTB domain-containing engulfment adapter protein 1			n[305]DKT[181]WM[147]HTPEALSK	Color2 [DarkGray]	1	4		2.24238e+06	-1.3856	-0.705759	-1.15566	-0.737799	-1.5089	-0.0223217
+	2.655	0.86102	sp|Q96K17|BT3L4_HUMAN	BTF3L4	Transcription factor BTF3 homolog 4		rev_sp|O76041|NEBL_HUMAN	n[305]KLQS[167]SLK	Color2 [DarkGray]	1	4		5.29936e+06	0.387912	1.11452	0.271584	0.959002	0.129094	1.29812
+	1.30669	0.860868	sp|Q13884|SNTB1_HUMAN	SNTB1	Beta-1-syntrophin			n[305]VLVNLSEDALVLSSEEGAAAYNGIGTATNGS[167]FCR	Color2 [DarkGray]	1	4		0	-2.26795	-2.01245	-2.96415	-1.97756	-3.31791	-1.97739
+	1.55178	0.860554	sp|Q7Z6E9|RBBP6_HUMAN	RBBP6	E3 ubiquitin-protein ligase RBBP6			n[305]AY[243]YGRSVDFRDPFEK	Color2 [DarkGray]	1	4		2942854	-1.15726	0.030426	-0.345312	0.190245	-0.557867	0.30055
+	1.98123	0.860529	sp|P53814|SMTN_HUMAN	SMTN	Smoothelin			n[305]S[167]LSVLSPR	Color2 [DarkGray]	1	4		17971318	-0.272861	0.809628	-0.00399446	0.337813	-0.328562	0.828729
+	1.8921	0.860283	sp|Q86WR7|PRSR2_HUMAN	PROSER2	Proline and serine-rich protein 2			n[305]S[167]LCFRPGPALPSTR	Color2 [DarkGray]	1	4		3.06942e+06	-1.85041	-1.18719	-2.04683	-1.46591	-2.20445	-0.867739
+	2.8794	0.860169	sp|Q7Z460|CLAP1_HUMAN	CLASP1	CLIP-associating protein 1			n[305]SSSSSQESLNRPLS[167]AK	Color2 [DarkGray]	1	4		2461633	-0.43469	0.713253	-0.179537	0.587559	-0.177911	0.487556
+	2.586	0.859916	sp|Q8N6H7|ARFG2_HUMAN	ARFGAP2	ADP-ribosylation factor GTPase-activating protein 2			n[305]EVESRS[167]SGLESSEAR	Color2 [DarkGray]	1	4		18851176	0.283568	1.2673	0.206661	0.845665	0.16102	1.11803
+	1.94306	0.859886	sp|O15042|SR140_HUMAN	U2SURP	U2 snRNP-associated SURP motif-containing protein			n[305]KKS[167]NLELFK	Color2 [DarkGray]	1	4		22692844	0.518411	1.55469	0.699973	1.08564	0.542691	1.7004
+	1.82223	0.859884	sp|Q96PY6|NEK1_HUMAN	NEK1	Serine/threonine-protein kinase Nek1			n[305]APFLGSGGTIAPSS[167]FSSR	Color2 [DarkGray]	1	4		3.32086e+06	-1.51972	-0.3998	-1.72658	-0.865446	-1.67977	-1.08118
+	2.5412	0.859089	sp|Q13442|HAP28_HUMAN	PDAP1	28 kDa heat- and acid-stable phosphoprotein			n[305]RM[147]QSLS[167]LNK	Color2 [DarkGray]	1	4		7189198	0.733996	1.35464	0.543643	1.32942	0.504522	1.67537
+	1.51009	0.858915	sp|Q9UPN7|PP6R1_HUMAN	PPP6R1	Serine/threonine-protein phosphatase 6 regulatory subunit 1			n[305]VSGEEELHTGPPAPQGPLSVPQGLPT[181]QSLASPPAR	Color2 [DarkGray]	1	4		0	-0.598142	0.438073	-0.933211	-0.28405	-1.06007	-0.168697
+	1.63944	0.858656	sp|Q9BX10|GTPB2_HUMAN	GTPBP2	GTP-binding protein 2			n[305]GAGSSS[167]GCGGPK	Color2 [DarkGray]	1	4		4766881	-1.15429	0.272281	-0.563734	-0.29159	-0.788964	0.0882864
+	2.12595	0.858535	sp|Q9BW19|KIFC1_HUMAN	KIFC1	Kinesin-like protein KIFC1			n[305]APS[167]QLPLSGSR	Color2 [DarkGray]	1	4		25297574	1.0284	2.07158	1.5329	1.96617	1.12051	2.21966
+	1.58535	0.858474	sp|P98179|RBM3_HUMAN	RBM3	RNA-binding protein 3			n[305]YYDS[167]RPGGYGYGYGRSR	Color2 [DarkGray]	1	4		4.69835e+06	0.78884	1.24093	0.644668	1.21919	0.244731	1.79354
+	2.10614	0.858342	sp|Q0JRZ9|FCHO2_HUMAN	FCHO2	F-BAR domain only protein 2			n[305]LTS[167]GKLSGINEIPRPFS[167]PPVTSNTSPPPAAPLAR	Color2 [DarkGray]	1	4		28316520	1.61284	2.47423	1.65988	2.2282	1.16393	2.30925
+	2.56762	0.857976	sp|Q15042|RB3GP_HUMAN	RAB3GAP1	Rab3 GTPase-activating protein catalytic subunit			n[305]LS[167]VSNMVHTAK	Color2 [DarkGray]	1	4		7.10059e+06	-0.0268593	0.749929	-0.170763	0.524023	-0.405318	0.697036
+	3.47653	0.857713	sp|Q9NWQ8|PHAG1_HUMAN	PAG1	Phosphoprotein associated with glycosphingolipid-enriched microdomains 1			n[305]FSSLS[167]YK	Color2 [DarkGray]	1	4		2.12701e+06	-0.791939	0.131571	-0.820372	-0.106256	-0.844462	0.0910511
+	2.44574	0.85748	sp|P23497|SP100_HUMAN	SP100	Nuclear autoantigen Sp-100			n[305]KLS[167]TFRESFK	Color2 [DarkGray]	1	4		11744889	1.27537	2.30449	1.3848	1.90881	1.30892	2.32824
+	1.37134	0.857242	sp|Q5T5U3|RHG21_HUMAN	ARHGAP21	Rho GTPase-activating protein 21			n[305]QTPQPLRHQSY[243]ILAVNDQETGSDTTCWLPNDAR	Color2 [DarkGray]	1	4		1.53869e+06	-1.2893	-1.23282	-1.95239	-0.618136	-1.99744	-0.816446
+	2.38091	0.856939	sp|Q8TF01|PNISR_HUMAN	PNISR	Arginine/serine-rich protein PNISR			n[305]RERPS[167]SFRDR	Color2 [DarkGray]	1	4		9827152	-0.68329	0.402776	-0.533204	0.262565	-0.230021	0.458961
+	1.89014	0.856854	sp|P49454|CENPF_HUMAN	CENPF	Centromere protein F			n[305]GDLETSNLQDM[147]QS[167]QEISGLK	Color2 [DarkGray]	1	4		1.48622e+06	-1.51228	-0.164563	-1.28186	-0.555411	-1.30089	-0.804495
+	2.12724	0.856852	sp|Q9NWH9|SLTM_HUMAN	SLTM	SAFB-like transcription modulator			n[305]GDHCRPS[167]R	Color2 [DarkGray]	1	4		3483819	-1.01144	-0.0389996	-0.804689	-0.386958	-1.25815	-0.0777721
+	3.36204	0.856805	sp|Q9BXS6|NUSAP_HUMAN	NUSAP1	Nucleolar and spindle-associated protein 1			n[305]AS[167]LSRPLNYEPHK	Color2 [DarkGray]	1	4		2.28264e+06	-0.724187	-0.0183754	-0.86882	-0.0524883	-0.934793	0.11348
+	2.63191	0.856758	sp|Q9P265|DIP2B_HUMAN	DIP2B	Disco-interacting protein 2 homolog B			n[305]TRS[167]GGARDER	Color2 [DarkGray]	1	4		11740534	-0.69713	0.443022	-0.509188	0.151935	-0.680012	0.0889883
+	2.44564	0.856654	sp|O95602|RPA1_HUMAN	POLR1A	DNA-directed RNA polymerase I subunit RPA1			n[305]KPT[181]HSQEPQGPEAM[147]ER	Color2 [DarkGray]	1	4		12722281	-2.9292	-1.77061	-2.93131	-2.16585	-2.83741	-2.1915
+	2.95094	0.856383	sp|Q6XZF7|DNMBP_HUMAN	DNMBP	Dynamin-binding protein			n[305]T[181]IDRQSAR	Color2 [DarkGray]	1	4		36070684	-0.0995893	1.03022	0.0987573	0.748658	0.0348396	0.824284
+	2.435	0.856162	sp|P35580|MYH10_HUMAN	MYH10	Myosin-10			n[305]RGGPIS[167]FSSSR	Color2 [DarkGray]	1	4		5597187	-0.524836	0.358847	-0.395404	0.130195	-0.580864	0.57834
+	2.52263	0.856063	sp|Q8IWC1|MA7D3_HUMAN	MAP7D3	MAP7 domain-containing protein 3			n[305]RLS[167]SYTECYK	Color2 [DarkGray]	1	4		22856212	2.27382	3.31144	2.53535	3.01567	2.25695	3.30719
+	1.53457	0.855945	sp|Q96HA1|P121A_HUMAN	POM121	Nuclear envelope pore membrane protein POM 121	POM121C	sp|A8CG34|P121C_HUMAN	n[305]RRPIAS[167]VR	Color2 [DarkGray]	1	4		2.28723e+06	-1.12528	-0.312491	-1.12074	-0.804562	-1.43366	0.00520611
+	2.59095	0.855561	sp|Q8NHG8|ZNRF2_HUMAN	ZNRF2	E3 ubiquitin-protein ligase ZNRF2			n[305]LVIGS[167]LPAHLS[167]PHMFGGFK	Color2 [DarkGray]	1	4		2.68535e+06	1.33021	2.3484	1.59546	2.39845	1.74281	2.48831
+	2.52195	0.855462	sp|Q8IWC1|MA7D3_HUMAN	MAP7D3	MAP7 domain-containing protein 3			n[305]LS[167]SYTECYK	Color2 [DarkGray]	1	4		13067190	-0.596321	0.516737	-0.27034	0.477737	-0.157847	0.547402
+	3.14342	0.855327	sp|Q8IZH2|XRN1_HUMAN	XRN1	5'-3' exoribonuclease 1			n[305]SGFNDNS[167]VK	Color2 [DarkGray]	1	4		3411956	-0.591254	0.234139	-0.577119	0.11671	-0.620369	0.426391
+	1.56454	0.855311	sp|Q15021|CND1_HUMAN	NCAPD2	Condensin complex subunit 1			n[305]RHPNTQQRAS[167]K	Color2 [DarkGray]	1	4		17875200	1.46181	2.14369	1.72541	2.17204	1.41717	2.85459
+	1.8293	0.855024	sp|Q13586|STIM1_HUMAN	STIM1	Stromal interaction molecule 1			n[305]LIEGVHPGS[167]LVEK	Color2 [DarkGray]	1	4		28208362	0.811077	1.70654	1.35025	1.81627	0.935555	2.13915
+	1.80779	0.854871	sp|O43290|SNUT1_HUMAN	SART1	U4/U6.U5 tri-snRNP-associated protein 1			n[305]YDEELEGERPHS[167]FRLEQGGTADGLR	Color2 [DarkGray]	1	4		15610754	2.19632	2.72153	1.59047	2.50211	1.62856	2.75631
+	1.6757	0.854327	sp|P29966|MARCS_HUMAN	MARCKS	Myristoylated alanine-rich C-kinase substrate			n[305]AEDGATPS[167]PSNET[181]PKK	Color2 [DarkGray]	1	4		48761764	0.445046	1.88761	1.09334	1.53868	1.04667	1.72175
+	1.5442	0.854071	sp|P34910|EVI2B_HUMAN	EVI2B	Protein EVI2B			n[305]ENEIS[167]TK	Color2 [DarkGray]	1	4		7.9532e+06	0.623974	1.98759	1.41547	1.86266	1.3106	2.062
+	2.30686	0.853791	sp|Q5VUA4|ZN318_HUMAN	ZNF318	Zinc finger protein 318			n[305]SS[167]GSSSGPAR	Color2 [DarkGray]	1	4		3003163	-1.46267	-0.598128	-1.64119	-0.673936	-1.17393	-0.444347
+	2.52614	0.853737	sp|P11166|GTR1_HUMAN	SLC2A1	Solute carrier family 2, facilitated glucose transporter member 1			n[305]QGGAS[167]QSDK	Color2 [DarkGray]	1	4		34010300	-1.65419	-0.65509	-1.3989	-0.751454	-1.35115	-0.436485
+	2.74504	0.853689	sp|O95239|KIF4A_HUMAN	KIF4A	Chromosome-associated kinesin KIF4A			n[305]RT[181]FSLTEVR	Color2 [DarkGray]	1	4		30532676	1.83151	2.7995	1.8173	2.46138	1.86333	2.81232
+	2.74664	0.853598	sp|Q9UDY2|ZO2_HUMAN	TJP2	Tight junction protein ZO-2			n[305]ELS[167]GWLR	Color2 [DarkGray]	1	4		5.41471e+06	-0.754619	0.290769	-0.684717	0.00108433	-0.864427	-0.0348206
+	3.13277	0.852689	sp|P53367|ARFP1_HUMAN	ARFIP1	Arfaptin-1			n[305]KWS[167]LNTYK	Color2 [DarkGray]	1	4		14714377	1.4993	2.41263	1.73901	2.36656	1.50433	2.52151
+	2.92987	0.85256	sp|O14782|KIF3C_HUMAN	KIF3C	Kinesin-like protein KIF3C			n[305]LDS[167]FLERPSTSK	Color2 [DarkGray]	1	4		4.22493e+06	-0.144909	0.859006	0.0821033	0.643171	-0.123555	0.869143
+	2.2104	0.851821	sp|P08397|HEM3_HUMAN	HMBS	Porphobilinogen deaminase			n[305]SVVGTS[167]SLRR	Color2 [DarkGray]	1	4		2030967	-1.38231	-0.463058	-1.26325	-0.793328	-1.43545	-0.26916
+	2.26518	0.851633	sp|Q9BXF6|RFIP5_HUMAN	RAB11FIP5	Rab11 family-interacting protein 5			n[305]NNLSASMFDLS[167]MK	Color2 [DarkGray]	1	4		9687650	0.562461	1.69141	0.843383	1.40105	0.90876	1.77705
+	2.01747	0.851211	sp|Q5BKX6|S45A4_HUMAN	SLC45A4	Solute carrier family 45 member 4			n[305]LGS[167]HCYR	Color2 [DarkGray]	1	4		1.68557e+06	-0.834593	0.328569	-0.608896	-0.128111	-0.53964	0.370046
+	1.85881	0.85112	sp|Q7Z699|SPRE1_HUMAN	SPRED1	Sprouty-related, EVH1 domain-containing protein 1			n[305]LSSPKDS[167]VVFK	Color2 [DarkGray]	1	4		806017	-1.68433	-0.729487	-1.33633	-1.01321	-1.73309	-0.457705
+	1.41564	0.850786	sp|Q9GZY8|MFF_HUMAN	MFF	Mitochondrial fission factor			n[305]GILSLIQSS[167]TRR	Color2 [DarkGray]	1	4		2.1071e+06	-2.37669	-0.974664	-1.61591	-1.50301	-2.03076	-0.993323
+	1.87356	0.850383	sp|Q09666|AHNK_HUMAN	AHNAK	Neuroblast differentiation-associated protein AHNAK			n[305]HRSNSFSDEREFSGPST[181]PT[181]GTLEFEGGEVSLEGGK	Color2 [DarkGray]	1	4		3736918	-0.205701	0.137966	-0.377148	0.585755	-0.495844	0.748734
+	2.81028	0.850293	sp|Q9UNS1|TIM_HUMAN	TIMELESS	Protein timeless homolog			n[305]FGGS[167]YIVQGLK	Color2 [DarkGray]	1	4		934480	-0.10559	0.697048	-0.136242	0.496065	-0.322628	0.793306
+	3.70238	0.849666	sp|Q52LW3|RHG29_HUMAN	ARHGAP29	Rho GTPase-activating protein 29			n[305]IRPVS[167]LPVDR	Color2 [DarkGray]	1	4		47054912	0.895299	1.79533	0.950496	1.63218	0.846638	1.81392
+	3.84158	0.848765	sp|Q9BTV7|CABL2_HUMAN	CABLES2	CDK5 and ABL1 enzyme substrate 2			n[305]ISDLRVDS[167]QK	Color2 [DarkGray]	1	4		12747175	1.08776	1.99153	1.2753	2.02027	1.10876	2.00631
+	2.05793	0.848235	sp|Q2NKX8|ERC6L_HUMAN	ERCC6L	DNA excision repair protein ERCC-6-like			n[305]TCLSWEFS[167]EKDDEPEEVVVK	Color2 [DarkGray]	1	4		7.76683e+06	-0.013093	0.716451	-0.293941	0.656054	0.166013	1.03118
+	1.79544	0.847582	sp|Q9NZJ7|MTCH1_HUMAN	MTCH1	Mitochondrial carrier homolog 1			n[305]HPRPAAQPS[167]AR	Color2 [DarkGray]	1	4		15739165	-0.881738	0.284307	-0.477159	-0.210098	-0.778445	0.331196
+	1.3242	0.846957	sp|O43609|SPY1_HUMAN	SPRY1	Protein sprouty homolog 1			n[305]LES[167]CPSRGQGKPS	Color2 [DarkGray]	1	4		7.99623e+06	0.19103	1.1781	0.692639	0.748888	-0.0892563	1.4083
+	3.42149	0.846557	sp|Q5SW79|CE170_HUMAN	CEP170	Centrosomal protein of 170 kDa			n[305]FT[181]IQLQLSQK	Color2 [DarkGray]	1	4		17007076	-0.453551	0.284703	-0.531476	0.230167	-0.681374	0.358399
+	2.7261	0.846182	sp|Q86XP3|DDX42_HUMAN	DDX42	ATP-dependent RNA helicase DDX42			n[305]YT[181]ENRGSSR	Color2 [DarkGray]	1	4		37442180	0.177816	1.14616	0.422603	0.961113	0.237932	1.26962
+	2.32312	0.845972	sp|O43823|AKAP8_HUMAN	AKAP8	A-kinase anchor protein 8			n[305]KT[181]SLHVAK	Color2 [DarkGray]	1	4		1.17321e+06	-1.21755	-0.412512	-1.23231	-0.688046	-1.40878	-0.22016
+	1.5049	0.845864	sp|Q969E2|SCAM4_HUMAN	SCAMP4	Secretory carrier-associated membrane protein 4			n[305]AQT[181]EWNTGTWRNPPSR	Color2 [DarkGray]	1	4		216566976	2.92205	3.63505	2.98855	3.39324	2.83333	4.25322
+	1.72652	0.845789	sp|Q9H040|SPRTN_HUMAN	SPRTN	DNA-dependent metalloprotease SPRTN			n[305]NS[167]VSSSSQR	Color2 [DarkGray]	1	4		929156	-1.81744	-0.953027	-1.65923	-1.3089	-1.90684	-0.584207
+	2.0748	0.845569	sp|Q86SQ0|PHLB2_HUMAN	PHLDB2	Pleckstrin homology-like domain family B member 2			n[305]QRLETILSLCAEYTKPDS[167]RLSTGTTVEDVQK	Color2 [DarkGray]	1	4		4311376	0.355636	1.54681	0.847457	1.25511	0.431796	1.36967
+	3.08354	0.845061	sp|O43491|E41L2_HUMAN	EPB41L2	Band 4.1-like protein 2			n[305]GSQPPPAAESQS[167]SLRR	Color2 [DarkGray]	1	4		24417920	-1.06933	-0.198977	-0.845674	-0.0298595	-1.05905	-0.210035
+	2.14264	0.844997	sp|Q9UKV3|ACINU_HUMAN	ACIN1	Apoptotic chromatin condensation inducer in the nucleus			n[305]TTSPLEEEEREIKS[167]SQGLK	Color2 [DarkGray]	1	4		3203937	-1.39081	-0.674562	-1.20418	-0.61203	-1.75473	-0.52814
+	1.98829	0.84489	sp|Q15555|MARE2_HUMAN	MAPRE2	Microtubule-associated protein RP/EB family member 2			n[305]HT[181]VRGER	Color2 [DarkGray]	1	4		1.27767e+06	-0.906465	-0.0153866	-0.795928	-0.317898	-0.852587	0.312976
+	1.7998	0.844423	sp|Q09666|AHNK_HUMAN	AHNAK	Neuroblast differentiation-associated protein AHNAK			n[305]VGIDT[181]PDIDIHGPEGK	Color2 [DarkGray]	1	4		4.3842e+06	-1.59426	-0.243222	-1.12252	-0.776321	-1.26029	-0.424261
+	1.36618	0.844182	sp|P00533|EGFR_HUMAN	EGFR	Epidermal growth factor receptor			n[305]TPLLSSLSAT[181]SNNSTVACIDRNGLQSCPIKEDSFLQR	Color2 [DarkGray]	1	4		2.25351e+06	-0.992785	-0.442603	-1.06509	-0.528428	-1.07189	0.373816
+	3.02285	0.844091	sp|O94874|UFL1_HUMAN	UFL1	E3 UFM1-protein ligase 1			n[305]ATEGSGS[167]M[147]RGGGGGNAR	Color2 [DarkGray]	1	4		9612066	-1.77384	-0.88058	-1.70665	-1.0995	-1.93183	-0.899961
+	2.21713	0.842897	sp|Q70EL1|UBP54_HUMAN	USP54	Inactive ubiquitin carboxyl-terminal hydrolase 54			n[305]KGS[167]LIERK	Color2 [DarkGray]	1	4		4400352	0.788825	1.61577	1.06467	1.53985	0.648769	1.87534
+	1.437	0.842787	sp|Q8IVF5|TIAM2_HUMAN	TIAM2	T-lymphoma invasion and metastasis-inducing protein 2			n[305]QIPCS[167]LK	Color2 [DarkGray]	1	4		1.88425e+06	-2.219	-0.831635	-1.32922	-1.01325	-1.60194	-0.776915
+	1.53596	0.842746	sp|O43609|SPY1_HUMAN	SPRY1	Protein sprouty homolog 1			n[305]NS[167]NTVYCK	Color2 [DarkGray]	1	4		3.79633e+06	0.91138	1.7733	1.34036	1.56442	0.702737	2.145
+	4.07392	0.842672	sp|P28482|MK01_HUMAN	MAPK1	Mitogen-activated protein kinase 1			n[305]VADPDHDHTGFLT[181]EY[243]VATR	Color2 [DarkGray]	1	4		20771894	-0.308189	0.488701	-0.373183	0.413053	-0.3671	0.577791
+	3.02657	0.842457	sp|O43615|TIM44_HUMAN	TIMM44	Mitochondrial import inner membrane translocase subunit TIM44			n[305]ALSQGVES[167]VKK	Color2 [DarkGray]	1	4		4264343	-1.2291	-0.267082	-1.04442	-0.270684	-0.932868	-0.141245
+	2.2474	0.842092	sp|Q92609|TBCD5_HUMAN	TBC1D5	TBC1 domain family member 5			n[305]TLRS[167]TSGK	Color2 [DarkGray]	1	4		3.73205e+06	0.469492	1.61187	0.466791	1.09759	0.608489	1.36158
+	2.80739	0.84195	sp|Q8N4V1|MMGT1_HUMAN	MMGT1	Membrane magnesium transporter 1		rev_sp|Q99973|TEP1_HUMAN	n[305]KLES[167]LRR	Color2 [DarkGray]	1	4		166712864	0.868357	1.92778	1.13886	1.6893	0.898466	1.81446
+	1.68923	0.841801	sp|Q6NZY4|ZCHC8_HUMAN	ZCCHC8	Zinc finger CCHC domain-containing protein 8			n[305]AELAPVNTEGALLDNGSVVPNCDISNGGS[167]QK	Color2 [DarkGray]	1	4		833770	-2.65906	-1.40998	-2.62063	-1.56305	-2.22333	-2.00459
+	2.38825	0.841094	sp|P08729|K2C7_HUMAN	KRT7	Keratin, type II cytoskeletal 7			n[305]LSS[167]ARPGGLGSSSLYGLGASRPR	Color2 [DarkGray]	1	4		11475335	0.0415468	0.855093	-0.0893731	0.653929	0.128139	1.09457
+	2.11314	0.84029	sp|Q92738|US6NL_HUMAN	USP6NL	USP6 N-terminal-like protein			n[305]RES[167]GAPHRR	Color2 [DarkGray]	1	4		5208734	-0.92212	0.0353422	-0.577493	0.0265856	-0.562281	0.397049
+	1.95524	0.839941	sp|Q8NHG8|ZNRF2_HUMAN	ZNRF2	E3 ubiquitin-protein ligase ZNRF2			n[305]AY[243]SGSDLPSSSSGGANGTAGGGGGAR	Color2 [DarkGray]	1	4		5390299	-0.755844	0.442418	-0.470656	-0.0157251	-0.411072	0.455557
+	2.21061	0.839816	sp|O15021|MAST4_HUMAN	MAST4	Microtubule-associated serine/threonine-protein kinase 4			n[305]RSPSATGQS[167]SFR	Color2 [DarkGray]	1	4		4683304	-0.888528	-0.132724	-0.867234	-0.227839	-0.836958	0.287291
+	2.55184	0.839668	sp|Q9H6S3|ES8L2_HUMAN	EPS8L2	Epidermal growth factor receptor kinase substrate 8-like protein 2			n[305]FHS[167]M[147]NQR	Color2 [DarkGray]	1	4		6.03177e+06	-1.46844	-0.581483	-1.33969	-0.823859	-1.56002	-0.443798
+	4.58028	0.839589	sp|Q8N1W1|ARG28_HUMAN	ARHGEF28	Rho guanine nucleotide exchange factor 28			n[305]T[181]FSFLM[147]NR	Color2 [DarkGray]	1	4		7550799	-0.615854	0.167181	-0.748151	0.156694	-0.66925	0.161635
+	1.40774	0.839544	sp|Q13151|ROA0_HUMAN	HNRNPA0	Heterogeneous nuclear ribonucleoprotein A0			n[305]RAVS[167]REDS[167]ARPGAHAK	Color2 [DarkGray]	1	4		2643948	-2.68176	-1.83004	-2.72373	-2.2926	-2.57776	-1.34198
+	2.11316	0.839427	sp|P27361|MK03_HUMAN	MAPK3	Mitogen-activated protein kinase 3			n[305]IADPEHDHTGFLTEY[243]VATR	Color2 [DarkGray]	1	4		59030368	2.29863	3.44429	2.21717	2.96567	2.53946	3.16359
+	2.37732	0.839071	sp|Q9H4Z3|CAPAM_HUMAN	PCIF1	mRNA (2'-O-methyladenosine-N(6)-)-methyltransferase			n[305]IEIPVT[181]PTGQSVPS[167]SPSIPGTPTLK	Color2 [DarkGray]	1	4		18307944	-0.213042	0.846484	-0.105879	0.62547	-0.323968	0.402369
+	2.11834	0.838862	sp|Q09666|AHNK_HUMAN	AHNAK	Neuroblast differentiation-associated protein AHNAK			n[305]GPQIT[181]GPSLEGDLGLK	Color2 [DarkGray]	1	4		4405501	-1.13645	-0.52087	-1.1266	-0.487811	-1.28597	-0.0237646
+	1.99483	0.838862	sp|Q9NVR2|INT10_HUMAN	INTS10	Integrator complex subunit 10			n[305]T[181]M[147]SSDDEDCSAK	Color2 [DarkGray]	1	4		3754620	0.450303	1.12033	0.174374	0.851494	0.246864	1.4163
+	2.24609	0.838747	sp|Q9NZB2|F120A_HUMAN	FAM120A	Constitutive coactivator of PPAR-gamma-like protein 1			n[305]LEIAGTVVGHWAGS[167]R	Color2 [DarkGray]	1	4		10023150	-2.15706	-1.21781	-1.83783	-1.4037	-2.29748	-1.15461
+	3.47309	0.838513	sp|Q15021|CND1_HUMAN	NCAPD2	Condensin complex subunit 1			n[305]TTPILRAS[167]AR	Color2 [DarkGray]	1	4		14731562	0.999795	1.90287	0.999741	1.71877	1.05803	1.95146
+	1.78266	0.837883	sp|P22626|ROA2_HUMAN	HNRNPA2B1	Heterogeneous nuclear ribonucleoproteins A2/B1			n[305]GGSDGY[243]GSGRGFGDGYNGYGGGPGGGNFGGSPGYGGGR	Color2 [DarkGray]	1	4		3902036	-0.096446	1.00262	0.253963	0.582963	0.124336	1.20992
+	1.34176	0.837795	sp|Q9NWQ4|GPT2L_HUMAN	GPATCH2L	G patch domain-containing protein 2-like			n[305]LGELWEEMALS[167]PR	Color2 [DarkGray]	1	4		0	-3.84679	-3.45898	-3.53163	-2.62328	-3.91328	-2.69606
+	2.19776	0.837489	sp|Q9C0C2|TB182_HUMAN	TNKS1BP1	182 kDa tankyrase-1-binding protein			n[305]TYGTTTAPRDEDGS[167]TLFRGWSQEGPVK	Color2 [DarkGray]	1	4		2.35249e+06	-1.49508	-0.462015	-1.18445	-0.66347	-1.19522	-0.236802
+	2.26222	0.837397	sp|P18847|ATF3_HUMAN	ATF3	Cyclic AMP-dependent transcription factor ATF-3			n[305]AQNGRT[181]PEDERNLFIQQIK	Color2 [DarkGray]	1	4		6.1456e+06	-0.662359	0.495945	-0.385294	0.0867043	-0.442674	0.439216
+	1.63142	0.836793	sp|Q01518|CAP1_HUMAN	CAP1	Adenylyl cyclase-associated protein 1			n[305]AGAAPY[243]VQAFDSLLAGPVAEYLK	Color2 [DarkGray]	1	4		0	-3.2283	-2.93029	-3.91863	-2.88993	-3.82054	-2.63688
+	2.78386	0.836552	sp|Q9C0B5|ZDHC5_HUMAN	ZDHHC5	Palmitoyltransferase ZDHHC5			n[305]SMSYS[167]S[167]QK	Color2 [DarkGray]	1	4		23663460	-0.212736	0.723476	0.072948	0.678593	-0.0494843	0.918315
+	3.45401	0.836454	sp|P50552|VASP_HUMAN	VASP	Vasodilator-stimulated phosphoprotein			n[305]NS[167]TTLPR	Color2 [DarkGray]	1	4		14206495	0.911429	1.73999	0.843346	1.65096	0.988623	1.86181
+	2.25994	0.836381	sp|Q12929|EPS8_HUMAN	EPS8	Epidermal growth factor receptor kinase substrate 8			n[305]GS[167]HLDQGEAAVAFKPTSNRHIDR	Color2 [DarkGray]	1	4		8313983	0.354098	1.19502	0.448132	0.940516	0.262477	1.43832
+	2.33657	0.836115	sp|Q92922|SMRC1_HUMAN	SMARCC1	SWI/SNF complex subunit SMARCC1			n[305]KGQAS[167]LYGK	Color2 [DarkGray]	1	4		8749027	1.32266	2.32234	1.49354	1.94549	1.30891	2.36563
+	3.11268	0.836062	sp|Q8IUD2|RB6I2_HUMAN	ERC1	ELKS/Rab6-interacting/CAST family member 1			n[305]TNS[167]TGGSSGSSVGGGSGK	Color2 [DarkGray]	1	4		18774382	1.15241	2.11302	1.31098	2.19431	1.45303	2.11728
+	1.45761	0.835824	sp|Q09666|AHNK_HUMAN	AHNAK	Neuroblast differentiation-associated protein AHNAK			n[305]LKS[167]EDGVEGDLGETQS[167]R	Color2 [DarkGray]	1	4		4823163	-1.01834	0.261144	-0.36612	-0.161705	-0.563691	0.45988
+	2.66628	0.835382	sp|Q7Z494|NPHP3_HUMAN	NPHP3	Nephrocystin-3			n[305]GVGAGGLLGAS[167]FK	Color2 [DarkGray]	1	4		2.88381e+06	-1.68009	-0.885834	-1.55263	-0.95703	-1.93263	-0.816336
+	1.26346	0.835285	sp|Q96HC4|PDLI5_HUMAN	PDLIM5	PDZ and LIM domain protein 5			n[305]YTEFYHVPTHSDAS[167]K	Color2 [DarkGray]	1	4		3.79647e+06	-2.20175	-0.858728	-1.38683	-1.00647	-1.33719	-0.55471
+	1.79243	0.834719	sp|Q13546|RIPK1_HUMAN	RIPK1	Receptor-interacting serine/threonine-protein kinase 1			n[305]LQDEANYHLYGS[167]RMDR	Color2 [DarkGray]	1	4		1164223	-2.16706	-1.02619	-1.64402	-1.36807	-1.97826	-0.890929
+	3.53939	0.834527	sp|Q8NHQ8|RASF8_HUMAN	RASSF8	Ras association domain-containing protein 8			n[305]EAPFQSGS[167]LK	Color2 [DarkGray]	1	4		8.22764e+06	1.24596	2.2422	1.37741	2.09662	1.26512	2.05325
+	1.69811	0.834175	sp|O95163|ELP1_HUMAN	ELP1	Elongator complex protein 1			n[305]YS[167]HSNSR	Color2 [DarkGray]	1	4		4.93225e+06	-0.815891	-0.253258	-1.45971	-0.557405	-1.38987	-0.352294
+	1.97475	0.833297	sp|Q6WKZ4|RFIP1_HUMAN	RAB11FIP1	Rab11 family-interacting protein 1			n[305]HLFS[167]STENLAAGS[167]WKEPAEGGGLSSDR	Color2 [DarkGray]	1	4		4.08855e+06	-1.60374	-0.496314	-1.16247	-0.814443	-1.4134	-0.368966
+	1.57871	0.833234	sp|Q12929|EPS8_HUMAN	EPS8	Epidermal growth factor receptor kinase substrate 8			n[305]QNS[167]SSSDSGGSIVRDS[167]QR	Color2 [DarkGray]	1	4		2.30844e+06	-1.41522	-0.736107	-0.897647	-0.292055	-1.35223	-0.137236
+	1.91598	0.833103	sp|O15037|KHNYN_HUMAN	KHNYN	Protein KHNYN			n[305]EPPGAHGS[167]CHR	Color2 [DarkGray]	1	4		41467808	-0.681159	-0.126748	-1.32801	-0.115168	-0.882175	-0.150122
+	1.51216	0.832436	sp|P10412|H14_HUMAN	H1-4	Histone H1.4	H1-1, H1-2, H1-3, H1-5, H1-6	sp|P16401|H15_HUMAN, sp|P16402|H13_HUMAN, sp|P16403|H12_HUMAN, sp|P22492|H1T_HUMAN, sp|Q02539|H11_HUMAN	n[305]GT[181]GASGS[167]FK	Color2 [DarkGray]	1	4		5.61939e+06	0.739918	0.950439	0.032002	1.21407	-0.00715733	1.09757
+	2.91562	0.832181	sp|P23497|SP100_HUMAN	SP100	Nuclear autoantigen Sp-100			n[305]KLST[181]FRESFK	Color2 [DarkGray]	1	4		18674926	1.69139	2.54026	1.66503	2.29967	1.62112	2.63416
+	2.87823	0.832107	sp|Q7L804|RFIP2_HUMAN	RAB11FIP2	Rab11 family-interacting protein 2			n[305]LNNGGSDSPCDLKSPNAFSENRQDYFDYES[167]TNPFTAK	Color2 [DarkGray]	1	4		5795861	0.765495	1.62148	1.04406	1.72431	0.888819	1.8489
+	1.5366	0.832074	sp|O75821|EIF3G_HUMAN	EIF3G	Eukaryotic translation initiation factor 3 subunit G			n[305]RGES[167]M[147]QPNR	Color2 [DarkGray]	1	4		1.62631e+06	-2.11186	-1.20455	-1.82371	-1.56051	-2.08306	-0.757345
+	1.63383	0.832044	sp|P43307|SSRA_HUMAN	SSR1	Translocon-associated protein subunit alpha			n[305]VEMGTSSQNDVDMS[167]WIPQETLNQINK	Color2 [DarkGray]	1	4		16984862	0.966176	2.35761	1.115	1.61749	1.20344	1.80565
+	1.79994	0.831671	sp|Q8IUW5|RELL1_HUMAN	RELL1	RELT-like protein 1			n[305]ERRSLMS[167]VSGAET[181]VNGEVPATPVK	Color2 [DarkGray]	1	4		3468611	-0.78074	-0.288873	-1.09207	-0.298635	-0.944736	0.264971
+	1.7	0.831628	sp|Q8WXG6|MADD_HUMAN	MADD	MAP kinase-activating death domain protein			n[305]ATPFPS[167]LK	Color2 [DarkGray]	1	4		614333	-2.63281	-1.73846	-2.63035	-2.2637	-2.76935	-1.53546
+	2.76062	0.831378	sp|Q6NSI4|RADX_HUMAN	RADX	RPA-related protein RADX			n[305]RAGS[167]QGPR	Color2 [DarkGray]	1	4		4.14537e+06	-1.89793	-1.05329	-2.13593	-1.34091	-2.09337	-1.2389
+	2.28369	0.831161	sp|P35579|MYH9_HUMAN	MYH9	Myosin-9			n[305]ELEDATETADAMNREVS[167]SLK	Color2 [DarkGray]	1	4		4171262	-0.0942163	1.05178	0.282326	1.04561	0.397346	0.981544
+	1.86304	0.831026	sp|P23497|SP100_HUMAN	SP100	Nuclear autoantigen Sp-100			n[305]LSTFRES[167]FKK	Color2 [DarkGray]	1	4		55645708	2.53206	3.32712	2.79254	3.17529	2.19774	3.513
+	2.97038	0.83049	sp|Q9NTJ3|SMC4_HUMAN	SMC4	Structural maintenance of chromosomes protein 4			n[305]GTQPS[167]TAR	Color2 [DarkGray]	1	4		6.46923e+06	0.872435	1.73205	0.857512	1.49981	0.839706	1.82926
+	2.3495	0.830483	sp|P08651|NFIC_HUMAN	NFIC	Nuclear factor 1 C-type			n[305]LS[167]SFTQHHRPVIAVHSGIAR	Color2 [DarkGray]	1	4		3.46598e+06	-1.86002	-1.1574	-1.68113	-1.09779	-2.02522	-0.819727
+	2.44814	0.830399	sp|Q99961|SH3G1_HUMAN	SH3GL1	Endophilin-A2			n[305]IAASSS[167]FR	Color2 [DarkGray]	1	4		1327062400	3.63182	4.55489	3.88337	4.467	3.43641	4.4209
+	1.63903	0.830071	sp|P20020|AT2B1_HUMAN	ATP2B1	Plasma membrane calcium-transporting ATPase 1			n[305]VVNAFRS[167]SLYEGLEKPESR	Color2 [DarkGray]	1	4		12978746	0.607412	1.36735	0.89271	1.66815	1.06559	2.02041
+	1.78653	0.829508	sp|P54252|ATX3_HUMAN	ATXN3	Ataxin-3			n[305]NIS[167]QDM[147]TQTSGTNLTSEELRK	Color2 [DarkGray]	1	4		0	0.67684	1.91507	0.589237	1.28077	0.84643	1.40519
+	2.07994	0.829353	sp|P15260|INGR1_HUMAN	IFNGR1	Interferon gamma receptor 1			n[305]S[167]LISVVR	Color2 [DarkGray]	1	4		5.94087e+06	-0.783585	0.290524	-0.272448	0.139745	-0.566862	0.434896
+	2.44115	0.829201	sp|Q6WCQ1|MPRIP_HUMAN	MPRIP	Myosin phosphatase Rho-interacting protein			n[305]VRVES[167]GYFSLEK	Color2 [DarkGray]	1	4		32177864	0.767066	1.68667	1.11999	1.61332	0.748281	1.82296
+	3.14245	0.828935	sp|Q92747|ARC1A_HUMAN	ARPC1A	Actin-related protein 2/3 complex subunit 1A			n[305]NMS[167]AM[147]ER	Color2 [DarkGray]	1	4		12351139	0.149205	1.13527	0.366406	1.04579	0.383633	1.205
+	1.41039	0.828665	sp|O14974|MYPT1_HUMAN	PPP1R12A	Protein phosphatase 1 regulatory subunit 12A			n[305]RS[167]T[181]GVSFWTQDSDENEQEQQSDTEEGSNKK	Color2 [DarkGray]	1	4		0	-0.882026	-0.0263033	-1.36847	-0.77132	-1.40784	-0.374708
+	2.02077	0.828161	sp|O15344|TRI18_HUMAN	MID1	E3 ubiquitin-protein ligase Midline-1			n[305]VSHDNLTVERDES[167]SSK	Color2 [DarkGray]	1	4		11501819	-0.606192	0.500294	-0.257199	0.21737	-0.237617	0.665813
+	1.71844	0.828071	sp|Q14247|SRC8_HUMAN	CTTN	Src substrate cortactin			n[305]T[181]VQGSGHQEHINIHK	Color2 [DarkGray]	1	4		3.92309e+06	0.0357399	1.19899	0.209569	0.619995	0.330903	1.24144
+	1.55026	0.828033	sp|P35222|CTNB1_HUMAN	CTNNB1	Catenin beta-1			n[305]RLS[167]VELTSS[167]LFR	Color2 [DarkGray]	1	4		3.30442e+06	-1.97122	-1.11815	-1.80792	-1.57639	-2.3182	-0.918698
+	2.33149	0.82778	sp|Q9C0B5|ZDHC5_HUMAN	ZDHHC5	Palmitoyltransferase ZDHHC5			n[305]SAQGT[181]GFELGQLQS[167]IRSEGTTSTSYK	Color2 [DarkGray]	1	4		2.12267e+06	-1.36357	-0.598453	-1.44602	-0.771092	-1.33228	-0.288989
+	2.00171	0.826923	sp|O95757|HS74L_HUMAN	HSPA4L	Heat shock 70 kDa protein 4L			n[305]LNQT[181]LKK	Color2 [DarkGray]	1	4		1.85252e+06	-0.680541	0.075633	-0.656361	0.159285	-0.358211	0.550738
+	1.70471	0.826723	sp|Q8NDI1|EHBP1_HUMAN	EHBP1	EH domain-binding protein 1			n[305]QLS[167]DQQDEER	Color2 [DarkGray]	1	4		8.21281e+06	-0.469992	0.684314	-0.441299	0.00533104	-0.701317	0.177917
+	1.60011	0.825449	sp|Q9H040|SPRTN_HUMAN	SPRTN	DNA-dependent metalloprotease SPRTN			n[305]NSVS[167]SSSQRR	Color2 [DarkGray]	1	4		2.89992e+06	-1.64399	-0.668638	-1.46659	-1.14764	-1.53586	-0.353817
+	1.60399	0.825306	sp|Q658P3|STEA3_HUMAN	STEAP3	Metalloreductase STEAP3			n[305]ES[167]TIKFTLPTDHALAEK	Color2 [DarkGray]	1	4		3259339	-0.389457	0.255964	-0.414729	0.0476789	-0.548529	0.819561
+	3.18689	0.82457	sp|Q9NUQ8|ABCF3_HUMAN	ABCF3	ATP-binding cassette sub-family F member 3			n[305]KES[167]RLESSGK	Color2 [DarkGray]	1	4		8.19894e+06	0.282605	1.05306	0.463711	1.18733	0.277111	1.25674
+	2.98581	0.82375	sp|Q06210|GFPT1_HUMAN	GFPT1	Glutamine--fructose-6-phosphate aminotransferase [isomerizing] 1			n[305]WGS[167]QGER	Color2 [DarkGray]	1	4		3.10295e+06	-0.85169	-0.0906134	-1.14578	-0.221875	-0.923596	-0.137329
+	2.71133	0.823748	sp|O94874|UFL1_HUMAN	UFL1	E3 UFM1-protein ligase 1			n[305]AT[181]EGSGSM[147]RGGGGGNAR	Color2 [DarkGray]	1	4		2.74382e+06	-2.10682	-1.1628	-1.91007	-1.32696	-1.93847	-0.994353
+	2.60031	0.823614	sp|Q9BZ67|FRMD8_HUMAN	FRMD8	FERM domain-containing protein 8			n[305]RGQS[167]LFAALR	Color2 [DarkGray]	1	4		1.15523e+06	-1.78635	-1.10024	-1.7856	-1.15673	-1.97442	-0.818566
+	3.80597	0.823512	sp|P57078|RIPK4_HUMAN	RIPK4	Receptor-interacting serine/threonine-protein kinase 4			n[305]KIS[167]VNAK	Color2 [DarkGray]	1	4		13543516	0.17477	0.959744	-0.00652361	0.863944	0.084137	0.899232
+	1.27458	0.823177	sp|Q8IUW5|RELL1_HUMAN	RELL1	RELT-like protein 1			n[305]ERRS[167]LMS[167]VSGAETVNGEVPATPVK	Color2 [DarkGray]	1	4		817991	-2.22749	-1.97758	-2.93569	-1.85468	-2.41407	-1.27546
+	3.03006	0.823075	sp|Q6P1N0|C2D1A_HUMAN	CC2D1A	Coiled-coil and C2 domain-containing protein 1A			n[305]S[167]FDAVLEALSR	Color2 [DarkGray]	1	4		13899626	0.532524	1.27043	0.245243	1.14462	0.329957	1.1619
+	2.43618	0.822851	sp|Q6UN15|FIP1_HUMAN	FIP1L1	Pre-mRNA 3'-end-processing factor FIP1			n[305]NSTSSQSQTST[181]ASRK	Color2 [DarkGray]	1	4		742917	-2.2948	-1.74285	-2.53698	-1.71473	-2.75456	-1.6602
+	2.19993	0.822731	sp|P16144|ITB4_HUMAN	ITGB4	Integrin beta-4			n[305]VT[181]NNM[147]QRPGFATHAASINPTELVPYGLSLR	Color2 [DarkGray]	1	4		1.33039e+06	-2.78816	-2.07055	-2.49344	-1.67277	-2.6104	-1.68049
+	2.33787	0.822165	sp|P08651|NFIC_HUMAN	NFIC	Nuclear factor 1 C-type			n[305]T[181]LPSTSSSGSK	Color2 [DarkGray]	1	4		9665230	0.99299	1.99288	1.21861	1.67048	0.844238	1.85897
+	1.47962	0.821915	sp|Q15365|PCBP1_HUMAN	PCBP1	Poly(rC)-binding protein 1			n[305]QQSHFAMM[147]HGGTGFAGIDS[167]SSPEVK	Color2 [DarkGray]	1	4		2.99544e+06	-1.06372	0.332343	-0.526918	-0.343642	-0.71508	0.171327
+	2.12515	0.82185	sp|P22692|IBP4_HUMAN	IGFBP4	Insulin-like growth factor-binding protein 4			n[305]IRDRS[167]TSGGK	Color2 [DarkGray]	1	4		16358399	0.222999	1.09462	0.620468	1.0697	0.23901	1.3837
+	1.49212	0.821745	sp|Q9UKY1|ZHX1_HUMAN	ZHX1	Zinc fingers and homeoboxes protein 1			n[305]INNWDRGPS[167]LIK	Color2 [DarkGray]	1	4		1.88768e+06	-1.59219	-0.705279	-2.14742	-1.34009	-1.98805	-1.21706
+	2.21443	0.821529	sp|Q16665|HIF1A_HUMAN	HIF1A	Hypoxia-inducible factor 1-alpha			n[305]T[181]ASPNRAGK	Color2 [DarkGray]	1	4		1.9912e+06	-0.176093	0.553174	-0.147109	0.457063	-0.168921	0.962227
+	2.56423	0.82144	sp|Q9ULH1|ASAP1_HUMAN	ASAP1	Arf-GAP with SH3 domain, ANK repeat and PH domain-containing protein 1			n[305]TDHLS[167]LDK	Color2 [DarkGray]	1	4		392038752	1.16438	2.003	1.48725	2.09214	1.24864	2.26944
+	1.816	0.821235	sp|Q8IZT6|ASPM_HUMAN	ASPM	Abnormal spindle-like microcephaly-associated protein			n[305]QQS[167]IAALK	Color2 [DarkGray]	1	4		4.93574e+06	0.570333	1.15283	0.440238	1.27721	0.71682	1.76105
+	1.82829	0.821166	sp|Q96MF7|NSE2_HUMAN	NSMCE2	E3 SUMO-protein ligase NSE2			n[305]QCGLQADREADGT[181]EGVDEDIIVTQSQTNFTCPITK	Color2 [DarkGray]	1	4		1.00216e+06	-2.22148	-1.68246	-2.34871	-1.11048	-2.3876	-1.70135
+	1.59495	0.820385	sp|O95243|MBD4_HUMAN	MBD4	Methyl-CpG-binding domain protein 4			n[305]T[181]SLYFSSK	Color2 [DarkGray]	1	4		3.01188e+06	-1.69859	-0.473205	-1.04187	-0.558243	-1.03026	-0.278116
+	2.8167	0.820289	sp|Q9Y2I8|WDR37_HUMAN	WDR37	WD repeat-containing protein 37			n[305]SHSLS[167]IRR	Color2 [DarkGray]	1	4		41553696	1.50701	2.22335	1.4772	2.19191	1.49487	2.52469
+	2.3699	0.820115	sp|P46100|ATRX_HUMAN	ATRX	Transcriptional regulator ATRX			n[305]NSLRT[181]STK	Color2 [DarkGray]	1	4		6.80954e+06	0.123412	1.00218	0.168627	0.801644	0.301476	1.25004
+	2.7634	0.820046	sp|Q9Y613|FHOD1_HUMAN	FHOD1	FH1/FH2 domain-containing protein 1			n[305]GDADSHAS[167]MK	Color2 [DarkGray]	1	4		3506992	-0.643201	0.231158	-0.359809	0.313075	-0.441235	0.471661
+	2.93282	0.820017	sp|Q96A65|EXOC4_HUMAN	EXOC4	Exocyst complex component 4			n[305]TLS[167]TSDDVEDRENEK	Color2 [DarkGray]	1	4		29488382	2.03694	2.97633	2.04886	2.87043	2.31184	3.01094
+	2.33768	0.819458	sp|Q12802|AKP13_HUMAN	AKAP13	A-kinase anchor protein 13			n[305]IPSFFPS[167]PEEPPSPSAPSIAK	Color2 [DarkGray]	1	4		10612655	0.1383	1.28125	0.233379	0.803959	0.231414	0.976254
+	2.59328	0.81943	sp|O95239|KIF4A_HUMAN	KIF4A	Chromosome-associated kinesin KIF4A			n[305]RTFS[167]LTEVR	Color2 [DarkGray]	1	4		2.54567e+06	-1.24347	-0.177286	-0.943569	-0.317156	-0.897694	-0.132003
+	2.43734	0.819347	sp|P52594|AGFG1_HUMAN	AGFG1	Arf-GAP domain and FG repeat-containing protein 1			n[305]GT[181]PS[167]QSPVVGR	Color2 [DarkGray]	1	4		99618984	2.11827	2.84015	2.25915	3.16323	2.3649	3.19698
+	1.96958	0.819129	sp|P13598|ICAM2_HUMAN	ICAM2	Intercellular adhesion molecule 2			n[305]MGT[181]YGVR	Color2 [DarkGray]	1	4		7468074	-0.189163	0.845294	0.0403657	0.383239	-0.169028	0.91103
+	1.88796	0.818809	sp|Q9UJU6|DBNL_HUMAN	DBNL	Drebrin-like protein			n[305]ASGANYS[167]FHK	Color2 [DarkGray]	1	4		15581204	0.666342	1.35828	0.794696	1.69862	1.03806	1.89862
+	1.67116	0.818454	sp|Q9NUQ3|TXLNG_HUMAN	TXLNG	Gamma-taxilin			n[305]NLVSPAYCTQES[167]REEIPGGEAR	Color2 [DarkGray]	1	4		70205976	1.00026	2.29331	1.44636	1.71977	1.32077	2.20968
+	1.39021	0.818445	sp|P17096|HMGA1_HUMAN	HMGA1	High mobility group protein HMG-I/HMG-Y			n[305]KQPPVSPGT[181]ALVGSQKEPSEVPTPK	Color2 [DarkGray]	1	4		1213396992	1.17923	2.68626	1.91919	2.19001	1.82948	2.50697
+	2.38277	0.81829	sp|Q13464|ROCK1_HUMAN	ROCK1	Rho-associated protein kinase 1			n[305]STANQS[167]FRK	Color2 [DarkGray]	1	4		290580064	4.52811	5.53127	4.8691	5.30386	4.58858	5.60553
+	2.07489	0.818111	sp|Q5SW79|CE170_HUMAN	CEP170	Centrosomal protein of 170 kDa			n[305]NIS[167]RIDLLAQPR	Color2 [DarkGray]	1	4		11934289	-1.22797	-0.0624094	-0.924257	-0.313519	-0.72726	-0.0492315
+	2.41384	0.817599	sp|Q8IVF2|AHNK2_HUMAN	AHNAK2	Protein AHNAK2			n[305]VS[167]FSSTK	Color2 [DarkGray]	1	4		10161004	1.90979	2.78402	2.08614	2.55512	1.84208	2.95166
+	2.32834	0.8175	sp|Q99700|ATX2_HUMAN	ATXN2	Ataxin-2			n[305]EGHS[167]INTR	Color2 [DarkGray]	1	4		2.80622e+06	0.0386963	0.54215	-0.0863795	1.01791	-0.0836143	0.761145
+	1.86563	0.817459	sp|Q09666|AHNK_HUMAN	AHNAK	Neuroblast differentiation-associated protein AHNAK			n[305]AGAISASGPELQGAGHS[167]K	Color2 [DarkGray]	1	4		4.11108e+06	-0.354775	0.5637	-0.183789	0.263631	-0.180333	0.90615
+	2.61417	0.817404	sp|P46100|ATRX_HUMAN	ATRX	Transcriptional regulator ATRX			n[305]RNSLRTS[167]TK	Color2 [DarkGray]	1	4		4426279	0.682016	1.61817	0.753877	1.3136	0.745163	1.70151
+	3.32731	0.817381	sp|Q8TF72|SHRM3_HUMAN	SHROOM3	Protein Shroom3			n[305]ERPS[167]SWSSLDQK	Color2 [DarkGray]	1	4		24786902	0.327171	1.1907	0.486212	1.35536	0.529024	1.2485
+	3.01414	0.817056	sp|Q9Y5K6|CD2AP_HUMAN	CD2AP	CD2-associated protein			n[305]T[181]RTSSSETEEK	Color2 [DarkGray]	1	4		7868102	-0.880323	0.125958	-0.559537	0.110123	-0.675489	0.0997362
+	3.36906	0.816921	sp|Q07866|KLC1_HUMAN	KLC1	Kinesin light chain 1			n[305]SRES[167]LNVDVVK	Color2 [DarkGray]	1	4		41390352	2.41164	3.39456	2.58396	3.29887	2.64176	3.39469
+	3.79018	0.816761	sp|Q9H788|SH24A_HUMAN	SH2D4A	SH2 domain-containing protein 4A			n[305]RLS[167]LGAQK	Color2 [DarkGray]	1	4		2.70921e+06	-0.382142	0.481278	-0.366726	0.543837	-0.32587	0.350429
+	1.60016	0.816695	sp|Q09666|AHNK_HUMAN	AHNAK	Neuroblast differentiation-associated protein AHNAK			n[305]VKGS[167]LGATGEIK	Color2 [DarkGray]	1	4		9989654	-0.496833	0.485305	-0.123039	0.147817	-0.330962	0.866129
+	2.06071	0.81661	sp|Q6PKG0|LARP1_HUMAN	LARP1	La-related protein 1			n[305]RCPS[167]QSSSRPAAM[147]ISQPPTPPTGQPVREDAK	Color2 [DarkGray]	1	4		3.81044e+06	-1.20657	-0.236912	-0.76019	-0.216181	-0.854576	0.081584
+	1.47265	0.816591	sp|O94826|TOM70_HUMAN	TOMM70	Mitochondrial import receptor subunit TOM70			n[305]GRGDAS[167]GLK	Color2 [DarkGray]	1	4		23321898	2.27137	3.50519	2.70743	2.86478	2.50669	3.5653
+	2.38183	0.816206	sp|Q8N1W1|ARG28_HUMAN	ARHGEF28	Rho guanine nucleotide exchange factor 28			n[305]SVPGTTLES[167]FRR	Color2 [DarkGray]	1	4		17494666	-0.925618	-0.33674	-1.3051	-0.32387	-0.988516	-0.110003
+	1.86142	0.816025	sp|Q7L2K0|TEDC2_HUMAN	TEDC2	Tubulin epsilon and delta complex protein 2			n[305]LLS[167]VGDGTR	Color2 [DarkGray]	1	4		2.41764e+06	-1.49751	-0.281676	-1.55705	-0.766477	-1.2014	-0.759743
+	1.78195	0.815964	sp|P17301|ITA2_HUMAN	ITGA2	Integrin alpha-2			n[305]NPDEIDETTELS[167]S	Color2 [DarkGray]	1	4		23983872	-1.48782	-0.27205	-1.24634	-0.648625	-0.920446	-0.28603
+	2.66515	0.815556	sp|Q66K74|MAP1S_HUMAN	MAP1S	Microtubule-associated protein 1S			n[305]AAS[167]SVPNLK	Color2 [DarkGray]	1	4		8462141	-0.623477	0.514819	-0.339942	0.32709	-0.365136	0.276205
+	2.39529	0.8153	sp|Q13496|MTM1_HUMAN	MTM1	Myotubularin			n[305]YNSHSLENES[167]IK	Color2 [DarkGray]	1	4		25801696	0.925522	1.85911	1.21304	1.71217	1.07452	2.08771
+	1.42959	0.815222	sp|Q9H788|SH24A_HUMAN	SH2D4A	SH2 domain-containing protein 4A			n[305]SWKEDS[167]EWQASLRK	Color2 [DarkGray]	1	4		1.54832e+06	-0.999371	-0.477992	-0.994518	-0.588843	-1.34064	0.177973
+	1.42493	0.814939	sp|Q96BR6|ZN669_HUMAN	ZNF669	Zinc finger protein 669			n[305]YHGS[167]IHTGERPYECK	Color2 [DarkGray]	1	4		748711	-2.95026	-1.41694	-2.35389	-1.97733	-2.28864	-1.75372
+	1.76123	0.814842	sp|Q9H4Z2|ZN335_HUMAN	ZNF335	Zinc finger protein 335			n[305]KWS[167]TSTK	Color2 [DarkGray]	1	4		25506496	0.769114	1.8053	1.38937	1.78171	1.09499	2.11098
+	1.58643	0.814807	sp|Q92890|UFD1_HUMAN	UFD1	Ubiquitin recognition factor in ER-associated degradation protein 1			n[305]FVAFS[167]GEGQSLRK	Color2 [DarkGray]	1	4		646275	-2.30448	-0.874824	-1.62767	-1.106	-1.71342	-1.22032
+	2.55078	0.814586	sp|O14503|BHE40_HUMAN	BHLHE40	Class E basic helix-loop-helix protein 40			n[305]KPS[167]DPAPK	Color2 [DarkGray]	1	4		3.61775e+06	0.161757	1.23115	0.358028	0.931067	0.123734	0.925064
+	1.39908	0.814504	sp|Q14872|MTF1_HUMAN	MTF1	Metal regulatory transcription factor 1			n[305]TFSTQYS[167]LK	Color2 [DarkGray]	1	4		14038228	0.288236	0.697937	-0.160097	0.498077	-0.60972	0.765916
+	1.84107	0.814328	sp|O95819|M4K4_HUMAN	MAP4K4	Mitogen-activated protein kinase kinase kinase kinase 4			n[305]SS[167]SKSEGSPSQR	Color2 [DarkGray]	1	4		789888	-1.91683	-1.50792	-1.92617	-1.20441	-2.27666	-0.964341
+	1.6839	0.814112	sp|Q9NV70|EXOC1_HUMAN	EXOC1	Exocyst complex component 1			n[305]LSVQS[167]SGNRR	Color2 [DarkGray]	1	4		1.68132e+06	-1.53349	-0.520141	-1.21193	-0.898912	-1.86965	-0.753678
+	1.91315	0.814098	sp|Q15057|ACAP2_HUMAN	ACAP2	Arf-GAP with coiled-coil, ANK repeat and PH domain-containing protein 2			n[305]AS[167]AQSSVR	Color2 [DarkGray]	1	4		13359808	0.649702	1.98601	1.05074	1.53312	1.01309	1.63669
+	1.40391	0.813966	sp|P30307|MPIP3_HUMAN	CDC25C	M-phase inducer phosphatase 3			n[305]TVS[167]LCDITITQM[147]LEEDSNQGHLIGDFSK	Color2 [DarkGray]	1	4		0	1.06443	2.03062	1.89134	2.29775	1.19321	2.26251
+	2.31514	0.813534	sp|Q14C86|GAPD1_HUMAN	GAPVD1	GTPase-activating protein and VPS9 domain-containing protein 1			n[305]S[167]SSLEM[147]TPYNTPQLSPATTPANKK	Color2 [DarkGray]	1	4		2.31943e+06	-0.994792	-0.575901	-1.32317	-0.238653	-1.21081	-0.273619
+	2.77923	0.813265	sp|P10412|H14_HUMAN	H1-4	Histone H1.4	H1-1, H1-2, H1-3, H1-5, H1-6	sp|P16401|H15_HUMAN, sp|P16402|H13_HUMAN, sp|P16403|H12_HUMAN, sp|P22492|H1T_HUMAN, sp|Q02539|H11_HUMAN	n[305]GTGASGS[167]FK	Color2 [DarkGray]	1	4		3.83297e+06	-0.204475	0.794339	0.0331302	0.635511	0.0417805	0.88038
+	3.04509	0.812861	sp|Q05682|CALD1_HUMAN	CALD1	Caldesmon			n[305]S[167]QNGEFM[147]THK	Color2 [DarkGray]	1	4		4.33678e+06	-0.357115	0.418094	-0.331594	0.294603	-0.451561	0.585615
+	1.65739	0.812713	sp|Q86US8|EST1A_HUMAN	SMG6	Telomerase-binding protein EST1A			n[305]RY[243]SRSDK	Color2 [DarkGray]	1	4		3.86497e+06	-0.139553	0.890028	-0.0219016	0.367785	0.0700054	1.08888
+	3.76367	0.812116	sp|Q5TEC3|ZN697_HUMAN	ZNF697	Zinc finger protein 697			n[305]QEDNQGVCAHQDS[167]EDK	Color2 [DarkGray]	1	4		10363225	0.139092	1.0684	0.31086	1.04963	0.320445	1.08871
+	2.7867	0.811999	sp|Q6ZU80|CE128_HUMAN	CEP128	Centrosomal protein of 128 kDa			n[305]GLQHQVS[167]QISK	Color2 [DarkGray]	1	4		10040996	0.0309095	0.722377	0.167727	0.85847	-0.0116348	1.04215
+	3.04449	0.811796	sp|Q92997|DVL3_HUMAN	DVL3	Segment polarity protein dishevelled homolog DVL-3			n[305]GVLQRPS[167]YK	Color2 [DarkGray]	1	4		1.81556e+06	-0.732841	-0.058547	-0.815272	0.0109949	-0.70808	0.226748
+	3.28669	0.8117	sp|Q15811|ITSN1_HUMAN	ITSN1	Intersectin-1			n[305]STSMDSGSSESPAS[167]LK	Color2 [DarkGray]	1	4		4.05245e+06	-1.16433	-0.223342	-1.04284	-0.42575	-1.22395	-0.346922
+	2.54336	0.811528	sp|Q7Z460|CLAP1_HUMAN	CLASP1	CLIP-associating protein 1			n[305]RLGS[167]STLGSK	Color2 [DarkGray]	1	4		1.79604e+06	-1.14447	-0.0378323	-0.782591	-0.153942	-0.787036	-0.0877438
+	1.47846	0.811327	sp|Q14160|SCRIB_HUMAN	SCRIB	Protein scribble homolog			n[305]KDT[181]PHYK	Color2 [DarkGray]	1	4		6.44651e+06	1.51162	2.18041	1.57671	1.89233	1.23669	2.68627
+	2.40278	0.811324	sp|Q9NSY1|BMP2K_HUMAN	BMP2K	BMP-2-inducible protein kinase			n[305]YSDM[147]S[167]SVYR	Color2 [DarkGray]	1	4		2.25913e+06	-1.24552	-0.124207	-1.05544	-0.423915	-0.890488	-0.209353
+	1.34199	0.811146	sp|Q15365|PCBP1_HUMAN	PCBP1	Poly(rC)-binding protein 1			n[305]QQSHFAMM[147]HGGT[181]GFAGIDSSSPEVK	Color2 [DarkGray]	1	4		2.99544e+06	-1.15309	0.223491	-0.883249	-0.165462	-0.276512	0.0625639
+	1.62821	0.810658	sp|Q0ZGT2|NEXN_HUMAN	NEXN	Nexilin			n[305]CLS[167]LVM[147]DDEIESEAK	Color2 [DarkGray]	1	4		21510648	1.03053	1.72669	1.41833	1.79375	0.882654	2.24304
+	2.75435	0.810653	sp|Q01804|OTUD4_HUMAN	OTUD4	OTU domain-containing protein 4			n[305]APPPESWNTVS[167]GK	Color2 [DarkGray]	1	4		3.44961e+06	-0.600273	0.330379	-0.368849	0.167067	-0.499838	0.465551
+	2.95759	0.810391	sp|O94887|FARP2_HUMAN	FARP2	FERM, ARHGEF and pleckstrin domain-containing protein 2	FRMD7	sp|Q6ZUT3|FRMD7_HUMAN	n[305]GS[167]SFRYS[167]GR	Color2 [DarkGray]	1	4		44332292	0.862752	1.83833	0.944192	1.60511	1.05283	1.84751
+	1.76762	0.810182	sp|A0JNW5|UH1BL_HUMAN	UHRF1BP1L	UHRF1-binding protein 1-like			n[305]S[167]QSSLSGKPK	Color2 [DarkGray]	1	4		6444216	0.214451	1.46451	0.588006	0.917953	0.21035	1.06089
+	1.6747	0.810123	sp|Q96KB5|TOPK_HUMAN	PBK	Lymphokine-activated killer T-cell-originated protein kinase			n[305]RSPRGLS[167]HSPWAVK	Color2 [DarkGray]	1	4		7.44642e+06	0.959212	1.31153	0.820367	1.81225	0.954094	2.04026
+	3.3538	0.809767	sp|P20020|AT2B1_HUMAN	ATP2B1	Plasma membrane calcium-transporting ATPase 1	ATP2B2	sp|Q01814|AT2B2_HUMAN	n[305]S[167]SLYEGLEKPESR	Color2 [DarkGray]	1	4		29359910	0.461566	1.30182	0.411175	1.29665	0.653088	1.35666
+	2.30176	0.809721	sp|Q9NYI0|PSD3_HUMAN	PSD3	PH and SEC7 domain-containing protein 3			n[305]DHRPETPS[167]IK	Color2 [DarkGray]	1	4		7597695	-0.203827	0.794678	0.183651	0.613386	-0.0835953	0.917328
+	2.0855	0.809655	sp|P42694|HELZ_HUMAN	HELZ	Probable helicase with zinc finger domain			n[305]ELS[167]HRDQSETR	Color2 [DarkGray]	1	4		1.81572e+06	-1.78004	-0.843832	-1.56578	-1.15843	-2.04472	-0.959325
+	2.18791	0.809001	sp|Q13247|SRSF6_HUMAN	SRSF6	Serine/arginine-rich splicing factor 6			n[305]DGY[243]SYGSR	Color2 [DarkGray]	1	4		20278202	0.0151434	1.11902	0.218672	1.03686	0.541376	1.04632
+	1.58935	0.808973	sp|Q3KQU3|MA7D1_HUMAN	MAP7D1	MAP7 domain-containing protein 1			n[305]RQS[167]LPAS[167]PR	Color2 [DarkGray]	1	4		14003441	0.414114	1.4079	0.978044	1.22616	0.599405	1.78442
+	3.99234	0.80812	sp|P50479|PDLI4_HUMAN	PDLIM4	PDZ and LIM domain protein 4			n[305]NLKPT[181]ASK	Color2 [DarkGray]	1	4		6.87484e+06	0.834108	1.61805	0.815764	1.60306	0.895695	1.74882
+	1.72949	0.807883	sp|O75533|SF3B1_HUMAN	SF3B1	Splicing factor 3B subunit 1			n[305]NRWDET[181]PK	Color2 [DarkGray]	1	4		14107400	0.778224	1.74838	1.2423	1.84049	1.31407	2.16938
+	1.95916	0.807871	sp|O60563|CCNT1_HUMAN	CCNT1	Cyclin-T1			n[305]TYSLSSSFS[167]SSSSTRK	Color2 [DarkGray]	1	4		5.4127e+06	0.565686	1.47639	0.632074	1.00689	0.376754	1.51485
+	2.15387	0.807513	sp|Q96S59|RANB9_HUMAN	RANBP9	Ran-binding protein 9			n[305]AHQS[167]YCHSNK	Color2 [DarkGray]	1	4		553398	-2.39157	-1.78411	-2.65299	-1.92989	-2.55121	-1.45923
+	2.38125	0.807285	sp|Q8NCA5|FA98A_HUMAN	FAM98A	Protein FAM98A			n[305]TSSGS[167]IREK	Color2 [DarkGray]	1	4		109623040	1.02463	2.1809	1.25026	1.77444	1.15409	1.8955
+	2.2954	0.806463	sp|Q16625|OCLN_HUMAN	OCLN	Occludin			n[305]RFYPESS[167]YK	Color2 [DarkGray]	1	4		4929836	-0.142742	0.860317	0.226439	0.642735	-0.167663	0.83237
+	2.22544	0.806286	sp|Q9UGP4|LIMD1_HUMAN	LIMD1	LIM domain-containing protein 1			n[305]EGPLGWSSDGSLGSVLLDS[167]PSSPR	Color2 [DarkGray]	1	4		0	-1.96624	-0.866846	-1.87942	-1.07842	-1.89833	-1.37987
+	1.81731	0.80627	sp|Q8WW12|PCNP_HUMAN	PCNP	PEST proteolytic signal-containing nuclear protein			n[305]FGFAIGS[167]QTTK	Color2 [DarkGray]	1	4		14018935	-1.29159	-0.384135	-0.836727	-0.53269	-1.34739	-0.140073
+	1.99398	0.805983	sp|Q86US8|EST1A_HUMAN	SMG6	Telomerase-binding protein EST1A			n[305]RYSRS[167]DK	Color2 [DarkGray]	1	4		3.55658e+06	-0.529216	0.597463	-0.0778565	0.383425	-0.109149	0.72084
+	1.74402	0.805979	sp|Q9UK76|JUPI1_HUMAN	JPT1	Jupiter microtubule associated homolog 1			n[305]GVDPNS[167]RNSSR	Color2 [DarkGray]	1	4		153062864	-1.49269	-0.619814	-1.1721	-0.894569	-1.58506	-0.317536
+	2.55162	0.805971	sp|Q8WUF5|IASPP_HUMAN	PPP1R13L	RelA-associated inhibitor			n[305]SESAPT[181]LHPYSPLSPK	Color2 [DarkGray]	1	4		10304685	-0.102961	0.532328	-0.35617	0.376622	-0.373284	0.676549
+	1.58664	0.805708	sp|Q8WUM9|S20A1_HUMAN	SLC20A1	Sodium-dependent phosphate transporter 1			n[305]LTWPNADS[167]KK	Color2 [DarkGray]	1	4		1612917	0.236564	1.03427	0.422092	0.718891	0.151465	1.47408
+	2.91972	0.805483	sp|Q9UHN6|CEIP2_HUMAN	CEMIP2	Cell surface hyaluronidase			n[305]HPS[167]GYVPGK	Color2 [DarkGray]	1	4		6.7818e+06	-0.248569	0.559276	-0.280339	0.329031	-0.364962	0.634274
+	2.79643	0.804838	sp|Q8WX93|PALLD_HUMAN	PALLD	Palladin			n[305]TTSVSLTIGSSS[167]PK	Color2 [DarkGray]	1	4		1.17067e+06	-2.82167	-1.93948	-2.72351	-1.86575	-2.86222	-2.18766
+	2.62428	0.80474	sp|Q8IY63|AMOL1_HUMAN	AMOTL1	Angiomotin-like protein 1			n[305]IMQLS[167]LER	Color2 [DarkGray]	1	4		2.13757e+06	-0.656104	0.122631	-0.761036	-0.00477314	-0.543652	0.33557
+	1.82069	0.804528	sp|Q8IVF7|FMNL3_HUMAN	FMNL3	Formin-like protein 3			n[305]Y[243]STLPGRR	Color2 [DarkGray]	1	4		2.95228e+06	-0.791906	0.062417	-0.458841	-0.0629663	-0.659714	0.503672
+	2.15574	0.804451	sp|Q9NYJ8|TAB2_HUMAN	TAB2	TGF-beta-activated kinase 1 and MAP3K7-binding protein 2			n[305]AIGNNSATS[167]PR	Color2 [DarkGray]	1	4		79900688	-0.105696	1.03543	-0.0563483	0.507078	0.0261564	0.734961
+	2.07466	0.804002	sp|P04049|RAF1_HUMAN	RAF1	RAF proto-oncogene serine/threonine-protein kinase			n[305]RM[147]RES[167]VSR	Color2 [DarkGray]	1	4		1.29646e+06	-2.33434	-1.52118	-1.90965	-1.27505	-2.10234	-1.1381
+	1.89189	0.80393	sp|O43639|NCK2_HUMAN	NCK2	Cytoplasmic protein NCK2			n[305]KT[181]S[167]ARDASPTPSTDAEYPANGSGADR	Color2 [DarkGray]	1	4		3.18188e+06	-2.5274	-2.12764	-3.01532	-1.88114	-3.03531	-2.15746
+	2.16858	0.803741	sp|Q7L7X3|TAOK1_HUMAN	TAOK1	Serine/threonine-protein kinase TAO1			n[305]GS[167]SM[147]GVR	Color2 [DarkGray]	1	4		3.2243e+06	-0.615046	0.574416	-0.182761	0.250659	-0.408303	0.380037
+	2.22399	0.803014	sp|Q09666|AHNK_HUMAN	AHNAK	Neuroblast differentiation-associated protein AHNAK			n[305]LEGPDVS[167]LK	Color2 [DarkGray]	1	4		28284820	-0.0642157	0.759264	0.0328279	0.753528	0.248558	1.11342
+	1.60492	0.802909	sp|Q86X02|CDR2L_HUMAN	CDR2L	Cerebellar degeneration-related protein 2-like			n[305]HAGNLTLHANS[167]VRK	Color2 [DarkGray]	1	4		12045388	0.415359	1.12314	0.291803	0.798031	0.383365	1.57808
+	2.40549	0.802464	sp|Q8IVF2|AHNK2_HUMAN	AHNAK2	Protein AHNAK2			n[305]FRT[181]GSGQGPSSTGQPGR	Color2 [DarkGray]	1	4		36872740	1.00928	1.85564	1.3353	1.84434	1.06329	2.11529
+	2.12669	0.802068	sp|P55327|TPD52_HUMAN	TPD52	Tumor protein D52			n[305]GWQDVT[181]ATSAYKK	Color2 [DarkGray]	1	4		1.86192e+06	-0.0652485	0.950567	0.0656219	0.707253	0.332393	1.08115
+	2.39515	0.802041	sp|Q6IQ49|SDE2_HUMAN	SDE2	Replication stress response regulator SDE2			n[305]EACRDLS[167]GR	Color2 [DarkGray]	1	4		5612620	0.700298	1.66978	0.858071	1.36154	0.846301	1.77947
+	2.80185	0.801252	sp|Q9NXH8|TOR4A_HUMAN	TOR4A	Torsin-4A			n[305]LVLYPET[181]SRK	Color2 [DarkGray]	1	4		12197351	-0.318557	0.587033	-0.120851	0.464883	-0.15371	0.758722
+	1.2806	0.801169	sp|P20700|LMNB1_HUMAN	LMNB1	Lamin-B1			n[305]VT[181]VSRASSSRS[167]VR	Color2 [DarkGray]	1	4		89267432	2.17532	3.22045	2.75628	2.76642	2.17864	3.52687
+	1.69347	0.800894	sp|Q5JTC6|AMER1_HUMAN	AMER1	APC membrane recruitment protein 1			n[305]GFFS[167]SIRR	Color2 [DarkGray]	1	4		8.19223e+06	-0.864424	0.444036	-0.186909	0.197309	-0.370377	0.339628
+	1.95128	0.800806	sp|Q6P2C8|MED27_HUMAN	MED27	Mediator of RNA polymerase II transcription subunit 27			n[305]LQYHAGLASGLLNQQS[167]LK	Color2 [DarkGray]	1	4		2.74016e+06	-1.86073	-1.2029	-2.12654	-1.43316	-1.92917	-0.877972
+	2.06414	0.800523	sp|Q8N6T3|ARFG1_HUMAN	ARFGAP1	ADP-ribosylation factor GTPase-activating protein 1			n[305]FGS[167]QASQK	Color2 [DarkGray]	1	4		3466735	1.10885	2.12873	1.10803	1.64803	1.27091	2.1126
+	2.86231	0.800484	sp|O95817|BAG3_HUMAN	BAG3	BAG family molecular chaperone regulator 3			n[305]AAS[167]PFRSSVQGASSR	Color2 [DarkGray]	1	4		13861257	1.63474	2.55955	1.64527	2.36473	1.8474	2.60459
+	2.04293	0.800203	sp|Q9UIF9|BAZ2A_HUMAN	BAZ2A	Bromodomain adjacent to zinc finger domain protein 2A			n[305]NVVHS[167]VRR	Color2 [DarkGray]	1	4		3.37082e+06	-0.62296	-0.088871	-1.01848	-0.271174	-1.05268	0.0665331
+	2.00191	0.800129	sp|Q09666|AHNK_HUMAN	AHNAK	Neuroblast differentiation-associated protein AHNAK			n[305]GPS[167]LKGDLDASVPSMK	Color2 [DarkGray]	1	4		3700517	0.863372	1.46132	0.9126	1.46288	0.689389	1.94155
+	1.56517	0.79993	sp|Q8N3R9|MPP5_HUMAN	MPP5	MAGUK p55 subfamily member 5			n[305]KQELDLNS[167]SMRLK	Color2 [DarkGray]	1	4		12615569	0.236224	0.826788	0.648966	1.1651	0.144326	1.43741
+	2.08895	0.799743	sp|Q9H6F5|CCD86_HUMAN	CCDC86	Coiled-coil domain-containing protein 86			n[305]EELTPGAPQHQLPPVPGSPEPY[243]PGQQAPGPEPSQPLLELTPR	Color2 [DarkGray]	1	4		16967248	0.905665	1.73934	0.489185	1.50441	0.888495	1.43882
+	1.70324	0.799379	sp|P29966|MARCS_HUMAN	MARCKS	Myristoylated alanine-rich C-kinase substrate			n[305]AEDGATPS[167]PS[167]NETPKK	Color2 [DarkGray]	1	4		3.00901e+06	-1.08122	0.136425	-0.60179	0.15766	-0.366177	0.054863
+	2.63106	0.799339	sp|Q96JB2|COG3_HUMAN	COG3	Conserved oligomeric Golgi complex subunit 3			n[305]LNS[167]NNALIEFLLEGTPEIR	Color2 [DarkGray]	1	4		0	-1.43117	-0.358387	-1.25049	-0.712446	-1.29422	-0.507037
+	5.03245	0.799294	sp|Q15149|PLEC_HUMAN	PLEC	Plectin			n[305]QIT[181]M[147]EELVR	Color2 [DarkGray]	1	4		42322840	2.88035	3.70688	2.87289	3.61747	2.86812	3.6949
+	1.64592	0.79925	sp|O95544|NADK_HUMAN	NADK	NAD kinase			n[305]S[167]LHGPCPVTTFGPK	Color2 [DarkGray]	1	4		64650688	1.90558	3.03554	2.43843	2.65237	1.82991	2.88376
+	2.18152	0.798994	sp|O75376|NCOR1_HUMAN	NCOR1	Nuclear receptor corepressor 1			n[305]TAHEIS[167]LK	Color2 [DarkGray]	1	4		11142061	-0.0083828	0.828036	-0.0300069	0.493555	-0.0164108	1.02059
+	1.88909	0.798861	sp|P09132|SRP19_HUMAN	SRP19	Signal recognition particle 19 kDa protein			n[305]T[181]GGADQSLQQGEGSKK	Color2 [DarkGray]	1	4		6031585	1.30866	2.10038	1.31243	1.70197	1.00965	2.22496
+	1.91503	0.798641	sp|Q86V48|LUZP1_HUMAN	LUZP1	Leucine zipper protein 1			n[305]S[167]SSEGLSK	Color2 [DarkGray]	1	4		5326280	0.767629	1.62099	0.896904	1.27199	0.708121	1.87559
+	1.91268	0.798624	sp|Q9NW75|GPTC2_HUMAN	GPATCH2	G patch domain-containing protein 2			n[305]LHGM[147]S[167]SK	Color2 [DarkGray]	1	4		2.3479e+06	-0.0495739	0.792356	-0.100663	0.470119	0.0916252	1.07479
+	2.67882	0.797966	sp|Q8TDN6|BRX1_HUMAN	BRIX1	Ribosome biogenesis protein BRX1 homolog			n[305]QRM[147]DS[167]GK	Color2 [DarkGray]	1	4		6.68345e+06	-0.302958	0.677305	-0.10472	0.50166	-0.0355177	0.771738
+	1.74946	0.797537	sp|Q9ULX3|NOB1_HUMAN	NOB1	RNA-binding protein NOB1			n[305]YAINPHLTEDQRFPQLRLS[167]QK	Color2 [DarkGray]	1	4		6.57775e+06	1.24368	2.38819	1.46429	2.07047	1.81735	2.45927
+	2.70975	0.797142	sp|O95817|BAG3_HUMAN	BAG3	BAG family molecular chaperone regulator 3			n[305]AASPFRS[167]SVQGASSR	Color2 [DarkGray]	1	4		12622056	0.0588303	0.911744	0.18556	0.829724	0.251734	1.14608
+	1.7147	0.796994	sp|P04792|HSPB1_HUMAN	HSPB1	Heat shock protein beta-1			n[305]QLS[167]SGVSEIRHTADR	Color2 [DarkGray]	1	4		10414778	0.421442	0.738945	0.0507951	0.827401	-0.0746574	1.22222
+	2.05296	0.79689	sp|O75122|CLAP2_HUMAN	CLASP2	CLIP-associating protein 2			n[305]SSGSVASLPQSDRS[167]S[167]SSSQESLNRPFSSK	Color2 [DarkGray]	1	4		4694314	0.935501	1.70965	1.21747	2.09857	1.31501	2.05044
+	3.01698	0.796342	sp|P00533|EGFR_HUMAN	EGFR	Epidermal growth factor receptor			n[305]EDS[167]FLQR	Color2 [DarkGray]	1	4		12489948	0.580902	1.54433	0.726292	1.3678	0.797012	1.58111
+	1.4854	0.796067	sp|P49841|GSK3B_HUMAN	GSK3B	Glycogen synthase kinase-3 beta			n[305]T[181]TSFAESCKPVQQPSAFGSM[147]K	Color2 [DarkGray]	1	4		8989666	-0.733559	0.371472	-0.141231	0.300744	-0.0933437	0.747851
+	2.09442	0.79553	sp|P43121|MUC18_HUMAN	MCAM	Cell surface glycoprotein MUC18			n[305]QEITLPPS[167]RKSELVVEVK	Color2 [DarkGray]	1	4		5.50893e+06	0.660008	1.249	0.292692	1.04051	0.409659	1.45944
+	3.07328	0.795468	sp|Q5T5Y3|CAMP1_HUMAN	CAMSAP1	Calmodulin-regulated spectrin-associated protein 1			n[305]S[167]VHREESCSDSGTK	Color2 [DarkGray]	1	4		13503809	-0.313954	0.264126	-0.375179	0.474616	-0.419993	0.538536
+	2.14634	0.79502	sp|Q8NG31|KNL1_HUMAN	KNL1	Kinetochore scaffold 1			n[305]RNCS[167]VTGIDDLEQIPADTTDINHLETQPVSSK	Color2 [DarkGray]	1	4		4553846	0.549962	1.23507	0.403615	1.07555	0.552288	1.5803
+	2.37504	0.795019	sp|O94776|MTA2_HUMAN	MTA2	Metastasis-associated protein MTA2			n[305]NQLS[167]QNR	Color2 [DarkGray]	1	4		193602352	-0.0605526	0.887184	-0.238424	0.585855	0.121574	0.734615
+	2.37839	0.794974	sp|Q9Y3R5|DOP2_HUMAN	DOP1B	Protein dopey-2			n[305]RSALLAAFQSES[167]FK	Color2 [DarkGray]	1	4		1.3932e+06	-1.98799	-0.960271	-1.68215	-1.26394	-1.9119	-0.972909
+	2.83248	0.794834	sp|O60343|TBCD4_HUMAN	TBC1D4	TBC1 domain family member 4			n[305]SLTSS[167]LENIFSR	Color2 [DarkGray]	1	4		59347836	3.25367	4.03812	3.0113	4.02182	3.25308	3.84262
+	2.88118	0.794767	sp|O43572|AKA10_HUMAN	AKAP10	A-kinase anchor protein 10, mitochondrial			n[305]GAGPS[167]PRQS[167]PR	Color2 [DarkGray]	1	4		1.93246e+06	-1.28583	-0.704823	-1.6053	-0.671861	-1.4529	-0.58305
+	2.42568	0.794627	sp|Q9NV70|EXOC1_HUMAN	EXOC1	Exocyst complex component 1			n[305]LS[167]VQSSGNR	Color2 [DarkGray]	1	4		8396473	0.384755	1.33904	0.247367	0.91483	0.292245	1.05438
+	3.17024	0.794065	sp|O14647|CHD2_HUMAN	CHD2	Chromodomain-helicase-DNA-binding protein 2			n[305]S[167]GSYRPNNMSR	Color2 [DarkGray]	1	4		3271079	-1.21315	-0.339036	-1.08404	-0.260075	-0.940342	-0.256227
+	2.73719	0.793946	sp|Q5VVQ6|OTU1_HUMAN	YOD1	Ubiquitin thioesterase OTU1			n[305]S[167]SPAFTK	Color2 [DarkGray]	1	4		24569308	0.320329	1.31826	0.404134	1.28841	0.613226	1.11285
+	1.78594	0.793865	sp|Q9Y4H2|IRS2_HUMAN	IRS2	Insulin receptor substrate 2			n[305]T[181]ASEGDGGAAAGAAAAGARPVSVAGSPLS[167]PGPVRAPLSR	Color2 [DarkGray]	1	4		5774859	0.279461	0.872058	0.607919	1.18755	0.194827	1.4042
+	2.22984	0.793849	sp|O75396|SC22B_HUMAN	SEC22B	Vesicle-trafficking protein SEC22b			n[305]ANNLS[167]SLSK	Color2 [DarkGray]	1	4		91717848	4.04653	5.12876	4.26772	4.74934	4.30196	5.11965
+	1.741	0.793743	sp|O75815|BCAR3_HUMAN	BCAR3	Breast cancer anti-estrogen resistance protein 3			n[305]VPSSPSAWLNS[167]EANYCELNPAFATGCGR	Color2 [DarkGray]	1	4		17455404	-0.52731	0.0229979	-0.398259	0.0742722	-0.9476	0.41079
+	3.81357	0.793699	sp|Q68DQ2|CRBG3_HUMAN	CRYBG3	Very large A-kinase anchor protein			n[305]NAWGS[167]IER	Color2 [DarkGray]	1	4		12995168	-0.508725	0.198771	-0.443613	0.323633	-0.564432	0.341923
+	1.51108	0.793691	sp|Q9NVA4|T184C_HUMAN	TMEM184C	Transmembrane protein 184C			n[305]HVGRT[181]VR	Color2 [DarkGray]	1	4		19713862	-1.43155	-0.351348	-0.729812	-0.55454	-1.27303	-0.147431
+	2.11652	0.793365	sp|Q8IY42|CD019_HUMAN	C4orf19	Uncharacterized protein C4orf19			n[305]WS[167]SEVLVQK	Color2 [DarkGray]	1	4		4511019	-0.298313	0.317754	-0.378801	0.181067	-0.747993	0.456167
+	2.27543	0.793182	sp|Q5VZL5|ZMYM4_HUMAN	ZMYM4	Zinc finger MYM-type protein 4			n[305]DFSLVRENS[167]K	Color2 [DarkGray]	1	4		72820112	2.6426	3.34806	2.84349	3.36532	2.39904	3.55129
+	1.89203	0.793145	sp|Q9Y2H0|DLGP4_HUMAN	DLGAP4	Disks large-associated protein 4			n[305]SLPDCTPHPNS[167]ISIDAGPR	Color2 [DarkGray]	1	4		5388859	-1.22815	-0.369925	-0.883579	-0.40806	-0.974327	0.0713682
+	2.00027	0.792935	sp|Q15004|PAF15_HUMAN	PCLAF	PCNA-associated factor			n[305]VLGS[167]STSATNSTSVSSRK	Color2 [DarkGray]	1	4		1.48785e+06	-1.70132	-0.903206	-1.46487	-0.856047	-1.41133	-0.439456
+	2.18572	0.792765	sp|Q9P2Y5|UVRAG_HUMAN	UVRAG	UV radiation resistance-associated gene protein			n[305]RIYALNENVSS[167]FRRPR	Color2 [DarkGray]	1	4		2.68048e+06	-1.5678	-0.593185	-1.16318	-0.626637	-1.22201	-0.354868
+	4.06295	0.792456	sp|Q7Z460|CLAP1_HUMAN	CLASP1	CLIP-associating protein 1			n[305]SSSSSQES[167]LNRPLSAK	Color2 [DarkGray]	1	4		3.93021e+06	0.25459	1.14526	0.350992	1.01436	0.300159	1.12349
+	2.28341	0.791851	sp|Q6ZSZ5|ARHGI_HUMAN	ARHGEF18	Rho guanine nucleotide exchange factor 18			n[305]S[167]LS[167]PILPGRHSPAPPPDPGFPAPSPPPADSPSEGFSLK	Color2 [DarkGray]	1	4		8518752	0.588766	1.24501	0.490146	1.07861	0.401091	1.53193
+	2.7126	0.791603	sp|P27816|MAP4_HUMAN	MAP4	Microtubule-associated protein 4			n[305]VGS[167]LDNVGHLPAGGAVK	Color2 [DarkGray]	1	4		163832448	2.6701	3.62641	2.73133	3.35327	2.85351	3.65007
+	2.54378	0.79159	sp|Q15154|PCM1_HUMAN	PCM1	Pericentriolar material 1 protein			n[305]Y[243]M[147]SQMSVPEQAELEK	Color2 [DarkGray]	1	4		14107665	-1.2926	-0.16491	-1.0298	-0.459916	-1.09683	-0.419637
+	3.09178	0.791503	sp|Q07157|ZO1_HUMAN	TJP1	Tight junction protein ZO-1			n[305]RSAS[167]LETK	Color2 [DarkGray]	1	4		138857184	2.98999	3.90667	3.16609	3.90653	3.2727	3.99009
+	2.97609	0.790912	sp|O75592|MYCB2_HUMAN	MYCBP2	E3 ubiquitin-protein ligase MYCBP2			n[305]RVNS[167]GDTEVGSSLLR	Color2 [DarkGray]	1	4		40060348	0.163852	1.10997	0.201574	0.861132	0.0781088	0.845171
+	1.34863	0.790543	sp|P49454|CENPF_HUMAN	CENPF	Centromere protein F			n[305]GDLETSNLQDMQS[167]QEISGLK	Color2 [DarkGray]	1	4		1.19973e+06	-2.47219	-1.004	-2.30338	-1.66119	-2.07891	-1.81767
+	1.88385	0.79047	sp|Q9BT25|HAUS8_HUMAN	HAUS8	HAUS augmin-like complex subunit 8			n[305]GAGKPATGPT[181]NSSSAK	Color2 [DarkGray]	1	4		0	-1.12171	-0.333309	-1.12574	-0.684949	-1.1899	-0.0476866
+	1.63843	0.790396	sp|P30626|SORCN_HUMAN	SRI	Sorcin			n[305]ALT[181]DSFRRR	Color2 [DarkGray]	1	4		9626810	1.11995	1.69309	1.20188	1.59623	0.674535	2.07823
+	1.6762	0.790252	sp|O75113|N4BP1_HUMAN	N4BP1	NEDD4-binding protein 1			n[305]GAS[167]SHQPR	Color2 [DarkGray]	1	4		1.12693e+06	-0.635269	0.169235	-0.485825	-0.11793	-0.595042	0.603314
+	2.1759	0.790178	sp|Q15650|TRIP4_HUMAN	TRIP4	Activating signal cointegrator 1			n[305]LLEFDRT[181]SIR	Color2 [DarkGray]	1	4		1.62747e+06	-1.84858	-0.802343	-1.51493	-1.15425	-1.82493	-0.861316
+	1.92698	0.790146	sp|Q8NCA5|FA98A_HUMAN	FAM98A	Protein FAM98A			n[305]T[181]SSGSIREK	Color2 [DarkGray]	1	4		19375648	-1.06258	0.223088	-0.793934	-0.184185	-0.72358	-0.248566
+	2.63181	0.789993	sp|Q96GA3|LTV1_HUMAN	LTV1	Protein LTV1 homolog			n[305]WDCES[167]ICSTYSNLYNHPQLIK	Color2 [DarkGray]	1	4		2.62804e+06	-2.37055	-1.31299	-2.20601	-1.64512	-2.17623	-1.42469
+	1.96324	0.78987	sp|Q9UJU6|DBNL_HUMAN	DBNL	Drebrin-like protein			n[305]ERAMS[167]T[181]TSISSPQPGK	Color2 [DarkGray]	1	4		3.17432e+06	-0.884716	-0.311564	-0.722144	-0.15941	-1.23473	-0.00100708
+	2.12819	0.789713	sp|Q96NE9|FRMD6_HUMAN	FRMD6	FERM domain-containing protein 6			n[305]ASGSSAGS[167]MK	Color2 [DarkGray]	1	4		21338648	2.56425	3.24411	2.35548	3.13267	2.65521	3.56729
+	3.3905	0.789617	sp|Q96PU5|NED4L_HUMAN	NEDD4L	E3 ubiquitin-protein ligase NEDD4-like			n[305]RLQITPDSNGEQFSSLIQREPS[167]SR	Color2 [DarkGray]	1	4		14063775	0.197152	1.15398	0.28773	1.08905	0.343572	0.954271
+	1.31197	0.789465	sp|Q71H61|ILDR2_HUMAN	ILDR2	Immunoglobulin-like domain-containing receptor 2			n[305]YDHSY[243]LGSAR	Color2 [DarkGray]	1	4		1.18129e+06	-0.862448	-0.710901	-0.934654	0.0952606	-1.04526	0.14168
+	1.65284	0.78942	sp|P30622|CLIP1_HUMAN	CLIP1	CAP-Gly domain-containing linker protein 1			n[305]RSPS[167]AS[167]SLSSMSSVASSVSSRPSR	Color2 [DarkGray]	1	4		10325354	-0.766527	0.366726	-0.0636668	0.490998	-0.208518	0.471823
+	1.92361	0.789258	sp|P49796|RGS3_HUMAN	RGS3	Regulator of G-protein signaling 3			n[305]RS[167]SMIETGQGAEGGLSLR	Color2 [DarkGray]	1	4		10965907	0.260449	1.51861	0.784251	1.33762	0.724518	1.28077
+	1.79054	0.789243	sp|P42166|LAP2A_HUMAN	TMPO	Lamina-associated polypeptide 2, isoform alpha			n[305]LAS[167]ERNLFISCK	Color2 [DarkGray]	1	4		1021326592	2.47331	3.03772	2.65621	3.1479	2.10197	3.41359
+	1.90692	0.789157	sp|Q86T20|SIM29_HUMAN	SMIM29	Small integral membrane protein 29			n[305]VVHGWQS[167]GYQHK	Color2 [DarkGray]	1	4		27746684	1.84072	2.92621	2.40385	2.73323	1.95667	2.90927
+	2.53472	0.789045	sp|Q96EY5|MB12A_HUMAN	MVB12A	Multivesicular body subunit 12A			n[305]LGS[167]RASTLR	Color2 [DarkGray]	1	4		11652121	1.3719	2.13853	1.54352	2.06911	1.15469	2.22961
+	3.58771	0.788915	sp|P51991|ROA3_HUMAN	HNRNPA3	Heterogeneous nuclear ribonucleoprotein A3			n[305]GGS[167]FGGR	Color2 [DarkGray]	1	4		298918592	3.0349	3.89661	3.01706	3.70276	3.06687	3.88621
+	2.48069	0.788412	sp|Q13257|MD2L1_HUMAN	MAD2L1	Mitotic spindle assembly checkpoint protein MAD2A			n[305]LRS[167]FTTTIHK	Color2 [DarkGray]	1	4		7.51766e+06	0.622185	1.52192	0.687336	1.26686	0.78123	1.6672
+	2.00961	0.788222	sp|Q3V6T2|GRDN_HUMAN	CCDC88A	Girdin			n[305]IS[167]ETLESR	Color2 [DarkGray]	1	4		49627808	2.59634	3.85015	3.03956	3.5064	2.90267	3.54668
+	2.54716	0.788098	sp|O95466|FMNL1_HUMAN	FMNL1	Formin-like protein 1			n[305]LT[181]PAHSR	Color2 [DarkGray]	1	4		7556251	-0.33164	0.776459	-0.179255	0.425507	-0.162564	0.48887
+	2.15145	0.78757	sp|Q71H61|ILDR2_HUMAN	ILDR2	Immunoglobulin-like domain-containing receptor 2			n[305]DLPYHSNS[167]EK	Color2 [DarkGray]	1	4		6863733	0.205353	1.0627	0.482786	0.865251	0.0577736	1.18067
+	2.93626	0.787464	sp|Q96A57|TM230_HUMAN	TMEM230	Transmembrane protein 230			n[305]LSS[167]TDDGYIDLQFKK	Color2 [DarkGray]	1	4		9066139	-0.357927	0.234062	-0.416361	0.309272	-0.581054	0.463715
+	1.74781	0.787252	sp|Q9P206|K1522_HUMAN	KIAA1522	Uncharacterized protein KIAA1522			n[305]RS[167]TVLGLPQHVQK	Color2 [DarkGray]	1	4		19951180	-1.729	-0.688751	-1.58158	-0.790839	-1.09361	-0.562848
+	1.6848	0.787081	sp|Q14498|RBM39_HUMAN	RBM39	RNA-binding protein 39			n[305]IGLPHSIKLS[167]R	Color2 [DarkGray]	1	4		11373305	0.337367	1.08573	0.255394	0.671551	0.192501	1.38922
+	2.69728	0.787061	sp|Q13085|ACACA_HUMAN	ACACA	Acetyl-CoA carboxylase 1			n[305]FIIGS[167]VSEDNS[167]EDEISNLVK	Color2 [DarkGray]	1	4		3.52455e+06	-0.170777	0.530931	-0.401208	0.357443	-0.245579	0.655246
+	2.35888	0.786976	sp|Q14160|SCRIB_HUMAN	SCRIB	Protein scribble homolog			n[305]EGAVVSAPS[167]VK	Color2 [DarkGray]	1	4		10149407	-0.103569	0.682106	0.219919	0.73933	-0.104401	0.951442
+	2.66264	0.786811	sp|P02686|MBP_HUMAN	MBP	Myelin basic protein			n[305]DAPGREDNT[181]FK	Color2 [DarkGray]	1	4		5.1976e+06	0.722709	1.5498	0.905365	1.66826	1.023	1.79344
+	2.49907	0.786794	sp|Q13451|FKBP5_HUMAN	FKBP5	Peptidyl-prolyl cis-trans isomerase FKBP5			n[305]GT[181]DSQAM[147]EEEKPEGHV	Color2 [DarkGray]	1	4		34665140	0.175488	1.2484	0.483689	1.02783	0.482066	1.22539
+	3.11809	0.78642	sp|Q0ZGT2|NEXN_HUMAN	NEXN	Nexilin			n[305]RS[167]GSIQAK	Color2 [DarkGray]	1	4		466156352	4.75386	5.75449	4.92678	5.6252	5.01334	5.67354
+	1.8061	0.786306	sp|Q13542|4EBP2_HUMAN	EIF4EBP2	Eukaryotic translation initiation factor 4E-binding protein 2			n[305]TVAISDAAQLPHDYCTTPGGTLFS[167]TTPGGTR	Color2 [DarkGray]	1	4		0	-0.189239	0.838519	-0.340041	0.658314	0.260498	0.593305
+	2.37664	0.786304	sp|O60347|TBC12_HUMAN	TBC1D12	TBC1 domain family member 12			n[305]NTFQVS[167]R	Color2 [DarkGray]	1	4		9155019	0.959738	1.92989	1.33049	1.79608	1.1515	2.07468
+	2.93523	0.785814	sp|Q96D71|REPS1_HUMAN	REPS1	RalBP1-associated Eps domain-containing protein 1			n[305]RT[181]GSDHTNPT[181]SPLLVKPSDLLEENK	Color2 [DarkGray]	1	4		20098648	2.16947	2.87723	2.00345	2.89534	2.27959	3.03738
+	2.75879	0.785505	sp|P52701|MSH6_HUMAN	MSH6	DNA mismatch repair protein Msh6			n[305]MVTGNGS[167]LKR	Color2 [DarkGray]	1	4		551584448	-0.415544	0.628989	-0.117791	0.546712	-0.10269	0.54479
+	1.48188	0.785272	sp|P05114|HMGN1_HUMAN	HMGN1	Non-histone chromosomal protein HMG-14			n[305]SARLS[167]AKPPAK	Color2 [DarkGray]	1	4		4.60524e+06	-0.311152	0.893874	0.28174	0.471231	0.0880709	1.04937
+	1.77369	0.785015	sp|Q5VUB5|F1711_HUMAN	FAM171A1	Protein FAM171A1			n[305]LQLPAGLESS[167]K	Color2 [DarkGray]	1	4		19431576	-2.1356	-1.51088	-2.33326	-1.84732	-2.53339	-1.28901
+	2.37397	0.784332	sp|Q2KHT3|CL16A_HUMAN	CLEC16A	Protein CLEC16A			n[305]S[167]RSWVGGGHGK	Color2 [DarkGray]	1	4		21204026	1.51049	2.52496	1.83139	2.24166	1.54911	2.47735
+	3.36384	0.78432	sp|O14646|CHD1_HUMAN	CHD1	Chromodomain-helicase-DNA-binding protein 1			n[305]QIS[167]FNGSEGR	Color2 [DarkGray]	1	4		16158469	0.0717821	0.887671	0.0951085	0.803008	-0.0922041	0.736967
+	2.37782	0.784173	sp|P10398|ARAF_HUMAN	ARAF	Serine/threonine-protein kinase A-Raf			n[305]GGS[167]DGTPRGS[167]PSPASVSSGRK	Color2 [DarkGray]	1	4		6.34481e+06	-1.64722	-0.769463	-1.37375	-0.946829	-1.67378	-0.625942
+	2.8441	0.783991	sp|Q3KQU3|MA7D1_HUMAN	MAP7D1	MAP7 domain-containing protein 1			n[305]ARLS[167]ASTASELSPK	Color2 [DarkGray]	1	4		21470786	0.999389	2.03933	1.19488	1.87461	1.29802	1.93033
+	2.32322	0.783559	sp|Q14118|DAG1_HUMAN	DAG1	Dystroglycan			n[305]LTLEDQAT[181]FIK	Color2 [DarkGray]	1	4		48210212	0.995005	1.94559	1.43934	2.10921	1.26421	1.99443
+	2.3521	0.783407	sp|Q14157|UBP2L_HUMAN	UBAP2L	Ubiquitin-associated protein 2-like			n[305]RYPS[167]SISS[167]SPQK	Color2 [DarkGray]	1	4		9590152	0.281486	1.13758	0.0285916	0.756263	0.10495	0.871403
+	1.75524	0.783295	sp|Q8IUW5|RELL1_HUMAN	RELL1	RELT-like protein 1			n[305]ERRS[167]LMSVSGAET[181]VNGEVPATPVK	Color2 [DarkGray]	1	4		3.09336e+06	-0.702686	0.0645056	-0.574426	-0.0458946	-0.481579	0.572582
+	1.97156	0.782736	sp|Q8WVK2|SNR27_HUMAN	SNRNP27	U4/U6.U5 small nuclear ribonucleoprotein 27 kDa protein			n[305]VDGSVNAYAINVS[167]QK	Color2 [DarkGray]	1	4		16527535	0.466109	1.3497	0.766827	1.28848	0.788394	1.73136
+	3.01188	0.78271	sp|O14545|TRAD1_HUMAN	TRAFD1	TRAF-type zinc finger domain-containing protein 1			n[305]S[167]TSGPRPGCQPSSPCVPK	Color2 [DarkGray]	1	4		4904926	0.632467	1.61814	0.679952	1.48087	0.786985	1.34853
+	2.22333	0.782628	sp|Q8N3R9|MPP5_HUMAN	MPP5	MAGUK p55 subfamily member 5			n[305]KQELDLNS[167]SMR	Color2 [DarkGray]	1	4		24884464	0.616635	1.59614	0.971563	1.34629	0.673963	1.66761
+	2.20556	0.782581	sp|O14879|IFIT3_HUMAN	IFIT3	Interferon-induced protein with tetratricopeptide repeats 3			n[305]Y[243]NGKSEDTAVQHGLEGLSISK	Color2 [DarkGray]	1	4		4.65201e+06	0.228954	1.27177	0.276958	0.986885	0.613399	1.2084
+	2.33118	0.782002	sp|Q9HB19|PKHA2_HUMAN	PLEKHA2	Pleckstrin homology domain-containing family A member 2			n[305]S[167]ISLTRPGSSSLSSGPNSILCR	Color2 [DarkGray]	1	4		74231144	3.71656	4.83471	4.10421	4.6099	3.87036	4.59252
+	2.90823	0.781908	sp|Q8WY36|BBX_HUMAN	BBX	HMG box transcription factor BBX			n[305]NIPSIFNTPEPTTTQEPLVGS[167]QK	Color2 [DarkGray]	1	4		5188384	0.251096	1.21638	0.312223	0.890853	0.276208	1.07802
+	2.98255	0.781867	sp|Q02880|TOP2B_HUMAN	TOP2B	DNA topoisomerase 2-beta			n[305]SQDFGNLFSFPS[167]YSQK	Color2 [DarkGray]	1	4		7117415	-0.238175	0.587176	-0.420155	0.375517	-0.203565	0.521013
+	2.48536	0.78183	sp|P48730|KC1D_HUMAN	CSNK1D	Casein kinase I isoform delta			n[305]GLPS[167]TASGR	Color2 [DarkGray]	1	4		6316716	-0.516737	0.516837	-0.198238	0.288231	-0.28581	0.539636
+	2.36546	0.781652	sp|P20020|AT2B1_HUMAN	ATP2B1	Plasma membrane calcium-transporting ATPase 1			n[305]VVNAFRSS[167]LYEGLEKPESR	Color2 [DarkGray]	1	4		11235734	-0.552874	0.203647	-0.205701	0.430506	-0.505008	0.447221
+	1.89879	0.781479	sp|Q92538|GBF1_HUMAN	GBF1	Golgi-specific brefeldin A-resistance guanine nucleotide exchange factor 1			n[305]AGGM[147]SDS[167]SK	Color2 [DarkGray]	1	4		2.11554e+06	-0.962866	-0.0456429	-1.1937	-0.418554	-0.722508	-0.0704393
+	2.49127	0.781113	sp|O15231|ZN185_HUMAN	ZNF185	Zinc finger protein 185			n[305]T[181]ANAGPPRPSSSGYK	Color2 [DarkGray]	1	4		4.6561e+06	0.436445	1.47971	0.661692	1.25195	0.768764	1.47858
+	2.21588	0.781078	sp|Q96D71|REPS1_HUMAN	REPS1	RalBP1-associated Eps domain-containing protein 1			n[305]RTGS[167]DHTNPTSPLLVKPSDLLEENK	Color2 [DarkGray]	1	4		3.15508e+06	0.509802	1.13895	0.305951	0.958746	0.0371885	1.09848
+	2.70979	0.780809	sp|P46821|MAP1B_HUMAN	MAP1B	Microtubule-associated protein 1B			n[305]ASVLFDTM[147]QHHLALNRDLS[167]TPGLEK	Color2 [DarkGray]	1	4		5243618	-0.236462	0.634405	-0.296447	0.295411	-0.288931	0.590772
+	2.30087	0.780809	sp|Q13459|MYO9B_HUMAN	MYO9B	Unconventional myosin-IXb			n[305]AT[181]GAALT[181]PTEERRTSFSTSDVSK	Color2 [DarkGray]	1	4		26306134	-0.156691	0.373051	-0.314282	0.454124	-0.6248	0.41948
+	2.48951	0.780718	sp|Q14152|EIF3A_HUMAN	EIF3A	Eukaryotic translation initiation factor 3 subunit A			n[305]RLGDSS[167]LSR	Color2 [DarkGray]	1	4		40667468	-0.843906	-0.208133	-0.673279	0.173395	-0.811779	0.0479279
+	3.33882	0.780111	sp|P02686|MBP_HUMAN	MBP	Myelin basic protein			n[305]ASTNSETNRGES[167]EK	Color2 [DarkGray]	1	4		10731119	0.23452	1.06372	0.401383	1.05693	0.156515	1.0121
+	1.87798	0.78009	sp|Q13625|ASPP2_HUMAN	TP53BP2	Apoptosis-stimulating of p53 protein 2		rev_sp|Q96AH8|RAB7B_HUMAN	n[305]SQDPS[167]LK	Color2 [DarkGray]	1	4		4371249	-1.46476	-0.963535	-1.53085	-0.676191	-1.341	-0.35662
+	1.74118	0.780089	sp|P17096|HMGA1_HUMAN	HMGA1	High mobility group protein HMG-I/HMG-Y			n[305]QPPVSPGT[181]ALVGSQKEPSEVPTPK	Color2 [DarkGray]	1	4		40995192	0.389689	1.67556	0.970889	1.2898	0.727852	1.46333
+	2.38908	0.779302	sp|P52272|HNRPM_HUMAN	HNRNPM	Heterogeneous nuclear ribonucleoprotein M			n[305]IGS[167]GVER	Color2 [DarkGray]	1	4		154779344	4.34469	5.17061	4.25062	4.89281	4.43268	5.30246
+	3.55468	0.779044	sp|O75717|WDHD1_HUMAN	WDHD1	WD repeat and HMG-box DNA-binding protein 1			n[305]FRNQVEEDAEDS[167]GEADDEEKPEIHKPGQNS[167]FSK	Color2 [DarkGray]	1	4		2.77367e+06	0.289156	1.21737	0.500823	1.17101	0.448209	1.18693
+	2.44317	0.778524	sp|Q8TDN4|CABL1_HUMAN	CABLES1	CDK5 and ABL1 enzyme substrate 1			n[305]T[181]RFSLLAAAER	Color2 [DarkGray]	1	4		3.10884e+06	-1.58224	-0.566926	-1.21392	-0.671416	-1.26413	-0.486382
+	1.73	0.778421	sp|Q13439|GOGA4_HUMAN	GOLGA4	Golgin subfamily A member 4			n[305]TSSRESLNRLDLDSSTASFDPPS[167]DMDS[167]EAEDLVGNSDSLNK	Color2 [DarkGray]	1	4		4.63647e+06	-1.03485	-0.0451126	-1.27662	-0.631798	-0.919933	-0.21923
+	2.96863	0.778275	sp|P11586|C1TC_HUMAN	MTHFD1	C-1-tetrahydrofolate synthase, cytoplasmic			n[305]KIT[181]IGQAPTEK	Color2 [DarkGray]	1	4		493432	-2.80647	-2.09653	-2.76225	-2.04572	-2.71773	-1.80937
+	3.91942	0.778055	sp|Q15428|SF3A2_HUMAN	SF3A2	Splicing factor 3A subunit 2			n[305]T[181]GSGGVASSSESNR	Color2 [DarkGray]	1	4		835752	-2.55557	-1.77921	-2.4462	-1.67842	-2.44652	-1.6565
+	2.09169	0.777966	sp|O75382|TRIM3_HUMAN	TRIM3	Tripartite motif-containing protein 3			n[305]RPS[167]SM[147]YSTGGK	Color2 [DarkGray]	1	4		3.60412e+06	-0.521413	0.395171	-0.170359	0.210759	-0.407726	0.62847
+	1.29433	0.777863	sp|O43493|TGON2_HUMAN	TGOLN2	Trans-Golgi network integral membrane protein 2			n[305]AS[167]DYQRLDQK	Color2 [DarkGray]	1	4		2.68574e+06	0.466068	1.08705	0.972265	1.23714	0.205214	1.65295
+	1.88798	0.777805	sp|Q6T4R5|NHS_HUMAN	NHS	Nance-Horan syndrome protein			n[305]KDS[167]GDM[147]SVR	Color2 [DarkGray]	1	4		1.03345e+06	-3.03626	-2.15744	-2.50814	-1.89033	-2.94276	-2.10597
+	2.62601	0.777685	sp|P50749|RASF2_HUMAN	RASSF2	Ras association domain-containing protein 2			n[305]T[181]RSDVGVR	Color2 [DarkGray]	1	4		3.00032e+06	-0.0931816	0.846665	0.104207	0.667568	0.138679	0.968526
+	1.95089	0.777565	sp|Q9H6Y7|RN167_HUMAN	RNF167	E3 ubiquitin-protein ligase RNF167			n[305]TPLLGS[167]SPTLPTSFGSLAPAPLVFPGPSTDPPLSPPSSPVILV	Color2 [DarkGray]	1	4		5494478	-4.24255	-3.28725	-3.88016	-3.01525	-4.0058	-3.49332
+	1.7959	0.777398	sp|P08670|VIME_HUMAN	VIM	Vimentin			n[305]MFGGPGT[181]AS[167]RPSSSRSYVTTSTR	Color2 [DarkGray]	1	4		4511181	0.184955	0.859353	-0.014811	0.688845	0.307065	1.2612
+	2.05326	0.777256	sp|Q92572|AP3S1_HUMAN	AP3S1	AP-3 complex subunit sigma-1			n[305]VPNLPS[167]FK	Color2 [DarkGray]	1	4		2.14381e+06	-1.28268	-0.953362	-1.63693	-0.710951	-1.676	-0.599517
+	2.66405	0.776931	sp|O43768|ENSA_HUMAN	ENSA	Alpha-endosulfine			n[305]YPS[167]LGQKPGGSDFLM[147]K	Color2 [DarkGray]	1	4		6.16038e+06	-0.182151	0.665678	-0.175048	0.359216	-0.250278	0.698421
+	2.05673	0.776899	sp|P0DPB5|RPC22_HUMAN	POLR1D	Protein POLR1D, isoform 2			n[305]S[167]HPYKHSFR	Color2 [DarkGray]	1	4		8543894	1.20567	1.90868	1.04789	1.59412	1.04071	2.12216
+	2.34687	0.776858	sp|Q9HCH0|NCK5L_HUMAN	NCKAP5L	Nck-associated protein 5-like			n[305]T[181]PSTSDM[147]AEEGR	Color2 [DarkGray]	1	4		2.50573e+06	-1.09555	-0.311006	-1.04276	-0.147626	-1.22328	-0.572381
+	1.36298	0.776828	sp|P34910|EVI2B_HUMAN	EVI2B	Protein EVI2B			n[305]SPFADGETPDICM[147]DNIRENEIS[167]TK	Color2 [DarkGray]	1	4		36488372	0.859921	1.8346	1.12035	1.26997	0.933373	2.13956
+	1.97943	0.776697	sp|Q6UN15|FIP1_HUMAN	FIP1L1	Pre-mRNA 3'-end-processing factor FIP1			n[305]ERDHS[167]PT[181]PSVFNSDEERYR	Color2 [DarkGray]	1	4		19164200	-0.820543	-0.0865994	-0.567661	0.0183878	-0.599227	0.410872
+	2.53228	0.776445	sp|P38936|CDN1A_HUMAN	CDKN1A	Cyclin-dependent kinase inhibitor 1			n[305]SGEQAEGSPGGPGDS[167]QGRK	Color2 [DarkGray]	1	4		1.7689e+06	-1.77399	-0.742029	-1.55508	-0.945569	-1.76192	-1.07406
+	2.08541	0.776293	sp|A0JNW5|UH1BL_HUMAN	UHRF1BP1L	UHRF1-binding protein 1-like			n[305]GTAESVNAGANLQNY[243]GETSPDAISTNSEGAQENHDDLM[147]SVVVFK	Color2 [DarkGray]	1	4		703653	-3.93644	-2.90008	-3.96999	-3.05389	-3.77608	-3.39965
+	1.31754	0.776275	sp|Q15418|KS6A1_HUMAN	RPS6KA1	Ribosomal protein S6 kinase alpha-1			n[305]GFS[167]FVATGLM[147]EDDGKPRAPQAPLHSVVQQLHGK	Color2 [DarkGray]	1	4		1.99446e+06	-0.135931	0.238896	-0.229922	0.192483	-0.881663	0.64993
+	2.79975	0.776238	sp|P27816|MAP4_HUMAN	MAP4	Microtubule-associated protein 4			n[305]STS[167]TSSMK	Color2 [DarkGray]	1	4		11806417	0.808758	1.71829	1.12786	1.65988	0.899678	1.78683
+	1.65112	0.776164	sp|Q7Z6J6|FRMD5_HUMAN	FRMD5	FERM domain-containing protein 5			n[305]S[167]CPSITHGPR	Color2 [DarkGray]	1	4		7.88672e+06	0.069562	0.900802	0.540119	0.815986	-0.126452	1.09493
+	1.83346	0.775967	sp|O14777|NDC80_HUMAN	NDC80	Kinetochore protein NDC80 homolog			n[305]NSQLGIFSSS[167]EK	Color2 [DarkGray]	1	4		80816808	-0.460656	0.326468	-0.547985	-0.0216064	-0.400736	0.613663
+	2.32153	0.77594	sp|Q15165|PON2_HUMAN	PON2	Serum paraoxonase/arylesterase 2			n[305]NT[181]VEIFK	Color2 [DarkGray]	1	4		27878840	0.261068	1.41224	0.578274	1.10587	0.562379	1.21144
+	1.44254	0.775787	sp|Q9UPU7|TBD2B_HUMAN	TBC1D2B	TBC1 domain family member 2B			n[305]DIIGS[167]YK	Color2 [DarkGray]	1	4		4.17043e+06	-0.928587	0.315864	-0.562103	-0.158877	-0.297639	0.382045
+	2.65338	0.775767	sp|P46940|IQGA1_HUMAN	IQGAP1	Ras GTPase-activating-like protein IQGAP1			n[305]ITLQDVVSHS[167]K	Color2 [DarkGray]	1	4		3.41435e+06	-0.534917	0.439094	-0.271916	0.201229	-0.53045	0.349694
+	2.80638	0.775423	sp|Q9UQ35|SRRM2_HUMAN	SRRM2	Serine/arginine repetitive matrix protein 2			n[305]DQQSSSSERGS[167]RR	Color2 [DarkGray]	1	4		3.78052e+06	-1.51184	-0.664751	-1.62	-0.986093	-1.60185	-0.756581
+	2.4772	0.775115	sp|Q92995|UBP13_HUMAN	USP13	Ubiquitin carboxyl-terminal hydrolase 13			n[305]GALFGMPGGS[167]GGRK	Color2 [DarkGray]	1	4		2896234	-0.729511	0.234282	-0.659837	-0.00664616	-0.437192	0.271168
+	1.77473	0.775073	sp|Q92616|GCN1_HUMAN	GCN1	eIF-2-alpha kinase activator GCN1			n[305]VT[181]TASVK	Color2 [DarkGray]	1	4		20227464	2.8461	3.58083	2.79755	3.1808	2.5825	3.78974
+	2.75908	0.774669	sp|Q8WVC0|LEO1_HUMAN	LEO1	RNA polymerase-associated protein LEO1			n[305]LRAS[167]IRR	Color2 [DarkGray]	1	4		43460528	1.19831	2.04991	1.46989	1.98931	1.24331	2.19629
+	2.32113	0.774552	sp|Q9P016|THYN1_HUMAN	THYN1	Thymocyte nuclear protein 1			n[305]RLAGT[181]SGSDK	Color2 [DarkGray]	1	4		3.93578e+06	-0.487245	0.456522	-0.123193	0.431975	-0.162159	0.66256
+	1.83806	0.774145	sp|Q8NAF0|ZN579_HUMAN	ZNF579	Zinc finger protein 579			n[305]LS[167]HSGLRPHACPLCPK	Color2 [DarkGray]	1	4		9599036	0.339458	1.36112	0.772834	1.09236	0.209433	1.19067
+	1.71978	0.774116	sp|Q9Y4H2|IRS2_HUMAN	IRS2	Insulin receptor substrate 2			n[305]S[167]RT[181]DSLAATPPAAK	Color2 [DarkGray]	1	4		1.43785e+06	-0.682468	0.217055	-1.09852	-0.225738	-0.581603	-0.0315571
+	1.85277	0.773983	sp|Q9UHE8|STEA1_HUMAN	STEAP1	Metalloreductase STEAP1			n[305]DTGETS[167]M[147]LK	Color2 [DarkGray]	1	4		2.83816e+06	-0.942308	-0.267448	-0.973031	-0.440356	-0.933172	0.181241
+	3.1523	0.773808	sp|O60343|TBCD4_HUMAN	TBC1D4	TBC1 domain family member 4			n[305]S[167]LTSSLENIFSR	Color2 [DarkGray]	1	4		16455340	1.27329	2.15704	1.29475	2.05369	1.50031	2.17905
+	2.05484	0.77379	sp|P55081|MFAP1_HUMAN	MFAP1	Microfibrillar-associated protein 1			n[305]DVFERPS[167]AK	Color2 [DarkGray]	1	4		7412775	0.254783	1.33081	0.353117	1.02431	0.692309	1.26646
+	1.50767	0.773714	sp|Q9H4A3|WNK1_HUMAN	WNK1	Serine/threonine-protein kinase WNK1			n[305]RRHT[181]MDK	Color2 [DarkGray]	1	4		10293642	1.15755	1.60347	1.33723	1.84336	0.943438	2.31254
+	1.38493	0.773582	sp|Q09666|AHNK_HUMAN	AHNAK	Neuroblast differentiation-associated protein AHNAK			n[305]GDLDASVPS[167]M[147]K	Color2 [DarkGray]	1	4		672757	-2.39398	-1.2494	-1.90823	-1.81253	-2.16848	-1.08802
+	3.65542	0.773322	sp|Q66PJ3|AR6P4_HUMAN	ARL6IP4	ADP-ribosylation factor-like protein 6-interacting protein 4			n[305]NCS[167]ASTS[167]QGRK	Color2 [DarkGray]	1	4		59251180	-0.646739	0.284307	-0.576488	0.100606	-0.559143	0.152684
+	1.78704	0.773317	sp|Q15287|RNPS1_HUMAN	RNPS1	RNA-binding protein with serine-rich domain 1			n[305]KS[167]STRAPS[167]PTK	Color2 [DarkGray]	1	4		3.21505e+06	-0.50412	0.355236	-0.354379	0.0965052	-0.283293	0.726419
+	1.70852	0.773092	sp|Q14241|ELOA1_HUMAN	ELOA	Elongin-A			n[305]HRKLS[167]ELERPHK	Color2 [DarkGray]	1	4		3.73566e+06	1.07014	1.81799	1.45744	1.95823	1.31554	2.38617
+	2.16307	0.772876	sp|Q5JU85|IQEC2_HUMAN	IQSEC2	IQ motif and SEC7 domain-containing protein 2			n[305]GLPYGGSCGGGIDGGGS[167]SVTTSGEFSNDITELEDSFSK	Color2 [DarkGray]	1	4		18127294	1.65898	2.0172	1.36365	2.26125	1.30267	2.36547
+	1.47165	0.772687	sp|Q9Y570|PPME1_HUMAN	PPME1	Protein phosphatase methylesterase 1			n[305]LPSRPPLPGSGGS[167]QSGAK	Color2 [DarkGray]	1	4		4.62418e+06	-1.39524	-0.219956	-0.625185	-0.44211	-1.07118	-0.111479
+	2.78494	0.772655	sp|O14646|CHD1_HUMAN	CHD1	Chromodomain-helicase-DNA-binding protein 1			n[305]S[167]NLEGSLK	Color2 [DarkGray]	1	4		16915118	0.454167	1.20173	0.300449	0.952067	0.320239	1.23903
+	1.84412	0.772577	sp|Q9NWB6|ARGL1_HUMAN	ARGLU1	Arginine and glutamate-rich protein 1			n[305]STNTAVS[167]RR	Color2 [DarkGray]	1	4		2.25119e+06	-1.56338	-0.38539	-1.21514	-0.920245	-1.41814	-0.573292
+	2.53807	0.771627	sp|O60343|TBCD4_HUMAN	TBC1D4	TBC1 domain family member 4			n[305]ILEDS[167]GFDEQQEFRSR	Color2 [DarkGray]	1	4		10887997	0.971605	1.81725	0.995409	1.82355	1.31311	1.9542
+	2.02501	0.771294	sp|Q92974|ARHG2_HUMAN	ARHGEF2	Rho guanine nucleotide exchange factor 2			n[305]ERPSSAIYPSDS[167]FR	Color2 [DarkGray]	1	4		1.45313e+06	-1.46374	-0.440155	-1.1294	-0.732576	-1.58768	-0.694199
+	2.50643	0.771003	sp|O75116|ROCK2_HUMAN	ROCK2	Rho-associated protein kinase 2			n[305]IQQNQS[167]IR	Color2 [DarkGray]	1	4		52786760	-0.52558	0.535484	-0.375406	0.274714	-0.44963	0.152196
+	1.69128	0.770888	sp|Q86SQ0|PHLB2_HUMAN	PHLDB2	Pleckstrin homology-like domain family B member 2			n[305]AS[167]SESSYLSILPK	Color2 [DarkGray]	1	4		8.00061e+06	-0.480504	0.564733	0.00783396	0.787794	0.174454	0.661922
+	2.11802	0.770806	sp|O75159|SOCS5_HUMAN	SOCS5	Suppressor of cytokine signaling 5			n[305]T[181]RSGLQR	Color2 [DarkGray]	1	4		3939467	-0.442165	0.595877	-0.0923495	0.244265	-0.384622	0.553142
+	2.30959	0.770031	sp|Q13573|SNW1_HUMAN	SNW1	SNW domain-containing protein 1			n[305]EFSGS[167]DRR	Color2 [DarkGray]	1	4		7440588	1.30602	2.09745	1.33679	1.858	1.33329	2.33074
+	1.40713	0.769503	sp|Q9HCD6|TANC2_HUMAN	TANC2	Protein TANC2			n[305]QLS[167]RDSR	Color2 [DarkGray]	1	4		42298200	-0.4184	0.283835	-0.422147	-0.113859	-1.09184	0.206146
+	2.23413	0.769403	sp|O95997|PTTG1_HUMAN	PTTG1	Securin	PTTG2, PTTG3P	sp|Q9NZH4|PTTG3_HUMAN, sp|Q9NZH5|PTTG2_HUMAN	n[305]QPS[167]FSAK	Color2 [DarkGray]	1	4		7515883	0.597511	1.59985	0.82131	1.28664	0.840961	1.6815
+	1.36064	0.769336	sp|P58335|ANTR2_HUMAN	ANTXR2	Anthrax toxin receptor 2			n[305]WGDKGS[167]TEEGAR	Color2 [DarkGray]	1	4		11295241	0.334317	1.46431	0.967053	1.3187	1.00054	1.82692
+	3.21888	0.769275	sp|Q8N684|CPSF7_HUMAN	CPSF7	Cleavage and polyadenylation specificity factor subunit 7			n[305]SYSVGAS[167]GSSSR	Color2 [DarkGray]	1	4		752999	-2.02919	-1.17986	-2.06696	-1.42296	-2.02039	-1.20588
+	2.01238	0.769198	sp|Q66PJ3|AR6P4_HUMAN	ARL6IP4	ADP-ribosylation factor-like protein 6-interacting protein 4			n[305]GAMAHVGS[167]R	Color2 [DarkGray]	1	4		3.17424e+06	-1.10829	-0.00332546	-0.732391	-0.295151	-0.720953	0.0444326
+	1.73095	0.769043	sp|Q9UM82|SPAT2_HUMAN	SPATA2	Spermatogenesis-associated protein 2			n[305]NDAHS[167]LYHK	Color2 [DarkGray]	1	4		3.10332e+06	-0.560646	0.239739	-0.467754	0.081975	-0.269479	0.687535
+	1.41266	0.769006	sp|Q9NUQ3|TXLNG_HUMAN	TXLNG	Gamma-taxilin			n[305]NLVSPAY[243]CTQESREEIPGGEAR	Color2 [DarkGray]	1	4		4.02564e+06	-1.18567	0.254196	-0.786427	-0.442102	-0.684748	-0.161925
+	1.67465	0.76877	sp|Q9Y520|PRC2C_HUMAN	PRRC2C	Protein PRRC2C			n[305]GLIPAGT[181]QHSMIATTGK	Color2 [DarkGray]	1	4		629429	-1.62187	-0.91312	-1.8281	-1.32816	-1.73771	-0.640094
+	2.07664	0.768756	sp|Q9BST9|RTKN_HUMAN	RTKN	Rhotekin			n[305]T[181]FSLDAVPPDHSPR	Color2 [DarkGray]	1	4		4.26303e+06	-2.58425	-1.93133	-2.67475	-2.07119	-2.59828	-1.5485
+	1.64455	0.768718	sp|Q9NZN5|ARHGC_HUMAN	ARHGEF12	Rho guanine nucleotide exchange factor 12			n[305]HGS[167]ILNR	Color2 [DarkGray]	1	4		97705288	-1.05188	0.105673	-0.393252	0.0407448	-0.48504	0.229564
+	2.5804	0.768676	sp|Q7L9B9|EEPD1_HUMAN	EEPD1	Endonuclease/exonuclease/phosphatase family domain-containing protein 1			n[305]SIPRDPS[167]DLSHSR	Color2 [DarkGray]	1	4		14375556	-0.167502	0.516973	-0.223538	0.390718	-0.518045	0.489249
+	1.55494	0.768673	sp|Q9BVC5|ASHWN_HUMAN	C2orf49	Ashwin			n[305]RPLIVFDGSSTSTS[167]IK	Color2 [DarkGray]	1	4		2.77628e+06	-1.74506	-0.612677	-1.2057	-1.04455	-1.51441	-0.50192
+	2.65891	0.768604	sp|Q96QE3|ATAD5_HUMAN	ATAD5	ATPase family AAA domain-containing protein 5			n[305]KHS[167]EREQPLK	Color2 [DarkGray]	1	4		2.54445e+06	-0.224005	0.63538	-0.237699	0.38854	-0.0967636	0.723424
+	2.92742	0.768348	sp|P49959|MRE11_HUMAN	MRE11	Double-strand break repair protein MRE11			n[305]WSSTS[167]SSK	Color2 [DarkGray]	1	4		5728301	0.967048	1.74478	0.863856	1.48888	0.836597	1.73888
+	3.72176	0.768194	sp|Q96QB1|RHG07_HUMAN	DLC1	Rho GTPase-activating protein 7			n[305]T[181]RSLS[167]ACNK	Color2 [DarkGray]	1	4		2509117	-0.940999	-0.0377636	-0.791485	-0.165641	-0.897696	-0.122193
+	3.12627	0.768189	sp|Q13257|MD2L1_HUMAN	MAD2L1	Mitotic spindle assembly checkpoint protein MAD2A			n[305]VNS[167]MVAYK	Color2 [DarkGray]	1	4		20681292	-0.088089	0.817366	0.00759554	0.587841	0.000185013	0.819052
+	2.00377	0.768052	sp|Q13574|DGKZ_HUMAN	DGKZ	Diacylglycerol kinase zeta			n[305]ES[167]GSRNVREPTFVR	Color2 [DarkGray]	1	4		4694181	-0.596435	0.145851	-0.431829	-0.0570765	-0.84317	0.343948
+	1.73205	0.767869	sp|P55196|AFAD_HUMAN	AFDN	Afadin			n[305]QAS[167]DKDDRPFQGEDVENSR	Color2 [DarkGray]	1	4		15998191	0.182702	1.19372	0.669666	1.155	0.696667	1.50393
+	2.00906	0.767651	sp|Q641Q2|WAC2A_HUMAN	WASHC2A	WASH complex subunit 2A	WASHC2C	sp|Q9Y4E1|WAC2C_HUMAN	n[305]RS[167]RPTSFADELAAR	Color2 [DarkGray]	1	4		21626400	0.845284	1.43773	0.568269	1.78437	0.823571	1.31798
+	2.22165	0.76759	sp|O94874|UFL1_HUMAN	UFL1	E3 UFM1-protein ligase 1			n[305]ATEGS[167]GSM[147]R	Color2 [DarkGray]	1	4		6139174	-1.07817	0.0393219	-0.926978	-0.358252	-0.775378	-0.158829
+	1.79075	0.767512	sp|P36897|TGFR1_HUMAN	TGFBR1	TGF-beta receptor type-1			n[305]NGT[181]CCIADLGLAVRHDSATDTIDIAPNHR	Color2 [DarkGray]	1	4		670247	-2.05926	-1.14259	-1.86509	-1.05107	-2.17212	-1.60028
+	2.13175	0.767359	sp|O95817|BAG3_HUMAN	BAG3	BAG family molecular chaperone regulator 3			n[305]SS[167]VQGASSR	Color2 [DarkGray]	1	4		29692642	-0.278531	0.893878	-0.0425611	0.505298	0.0695152	0.651325
+	2.12536	0.766541	sp|Q32NC0|CR021_HUMAN	C18orf21	UPF0711 protein C18orf21			n[305]SRS[167]FVSTLK	Color2 [DarkGray]	1	4		2.56525e+06	-1.40467	-0.362454	-1.49035	-0.670294	-1.11976	-0.682405
+	2.38895	0.766501	sp|Q09666|AHNK_HUMAN	AHNAK	Neuroblast differentiation-associated protein AHNAK			n[305]GPS[167]LDIDTPDVNIEGPEGK	Color2 [DarkGray]	1	4		1.36603e+06	-1.94934	-1.18571	-1.82142	-1.02052	-1.61972	-0.884758
+	1.80624	0.766459	sp|P46060|RAGP1_HUMAN	RANGAP1	Ran GTPase-activating protein 1			n[305]TQVAGGQLS[167]FK	Color2 [DarkGray]	1	4		22016314	0.142539	0.985539	0.193795	0.579191	0.156612	1.22759
+	3.06998	0.766447	sp|Q15459|SF3A1_HUMAN	SF3A1	Splicing factor 3A subunit 1			n[305]VTWDGHSGS[167]M[147]AR	Color2 [DarkGray]	1	4		11001504	-0.0149803	0.922812	0.237145	0.783886	0.0550117	0.86982
+	2.46289	0.766061	sp|P51531|SMCA2_HUMAN	SMARCA2	Probable global transcription activator SNF2L2			n[305]AKPVVS[167]DFDS[167]DEEQDER	Color2 [DarkGray]	1	4		11938144	1.10737	2.045	1.48327	2.03883	1.14416	1.94915
+	1.30663	0.76599	sp|A8CG34|P121C_HUMAN	POM121C	Nuclear envelope pore membrane protein POM 121C			n[305]GS[167]RPLSSFVQK	Color2 [DarkGray]	1	4		38326524	-0.698752	0.127734	-0.157858	-0.00599766	-0.6186	0.701023
+	1.78183	0.765972	sp|Q96QZ7|MAGI1_HUMAN	MAGI1	Membrane-associated guanylate kinase, WW and PDZ domain-containing protein 1			n[305]KPDS[167]GACRPK	Color2 [DarkGray]	1	4		352171	-2.19005	-1.56623	-2.75415	-1.9141	-2.51205	-1.678
+	2.48051	0.765764	sp|Q66PJ3|AR6P4_HUMAN	ARL6IP4	ADP-ribosylation factor-like protein 6-interacting protein 4			n[305]NCS[167]AS[167]TSQGRK	Color2 [DarkGray]	1	4		2.04103e+06	-2.23625	-1.5521	-2.00635	-1.398	-2.38004	-1.37525
+	4.88787	0.7655	sp|O95402|MED26_HUMAN	MED26	Mediator of RNA polymerase II transcription subunit 26			n[305]HEGS[167]FAR	Color2 [DarkGray]	1	4		2574313	-0.585577	0.166816	-0.597688	0.227853	-0.591093	0.127474
+	4.27652	0.765392	sp|Q5SW79|CE170_HUMAN	CEP170	Centrosomal protein of 170 kDa			n[305]LQSAGSAMPT[181]SSSFK	Color2 [DarkGray]	1	4		3.30518e+06	0.159472	0.857834	0.0851254	0.852324	0.014823	0.845438
+	2.81486	0.765286	sp|P11274|BCR_HUMAN	BCR	Breakpoint cluster region protein			n[305]T[181]GQIWPNDGEGAFHGDADGSFGTPPGYGCAADRAEEQR	Color2 [DarkGray]	1	4		2.9728e+06	-1.60849	-0.764923	-1.54024	-0.735107	-1.29993	-0.652767
+	2.45579	0.76474	sp|P04049|RAF1_HUMAN	RAF1	RAF proto-oncogene serine/threonine-protein kinase			n[305]DAVFDGSSCIS[167]PTIVQQFGYQR	Color2 [DarkGray]	1	4		30880122	1.20866	2.24418	1.49009	2.11002	1.59788	2.23665
+	3.03202	0.764459	sp|Q68EM7|RHG17_HUMAN	ARHGAP17	Rho GTPase-activating protein 17			n[305]RPAS[167]MAVMEGDLVK	Color2 [DarkGray]	1	4		7557161	0.40088	1.08523	0.338532	1.26285	0.560924	1.24563
+	2.56537	0.764301	sp|Q9BXP5|SRRT_HUMAN	SRRT	Serrate RNA effector molecule homolog			n[305]LGS[167]IAEIDLGVPPPVM[147]K	Color2 [DarkGray]	1	4		11935437	-0.674384	0.0557947	-0.51615	0.143241	-0.506942	0.396392
+	1.82442	0.764221	sp|Q13151|ROA0_HUMAN	HNRNPA0	Heterogeneous nuclear ribonucleoprotein A0			n[305]EDIYSGGGGGGS[167]R	Color2 [DarkGray]	1	4		25104160	-1.5259	-0.416941	-1.21355	-0.841207	-1.17744	-0.366075
+	2.78315	0.764065	sp|O43149|ZZEF1_HUMAN	ZZEF1	Zinc finger ZZ-type and EF-hand domain-containing protein 1		rev_sp|Q9Y3M8|STA13_HUMAN	n[305]LRLLS[167]FR	Color2 [DarkGray]	1	4		5.43586e+06	0.162918	0.99738	0.428565	0.942692	0.179807	1.12341
+	2.74453	0.763967	sp|O75157|T22D2_HUMAN	TSC22D2	TSC22 domain family protein 2			n[305]S[167]SSEETLNNVGDAETPGTVSPNLLLDGQLAAAAAAPANGGGVVSAR	Color2 [DarkGray]	1	4		0	-1.56598	-0.922395	-1.60068	-0.705379	-1.7486	-0.995581
+	2.76226	0.763631	sp|Q96HC4|PDLI5_HUMAN	PDLIM5	PDZ and LIM domain protein 5			n[305]EVVKPVPITS[167]PAVSK	Color2 [DarkGray]	1	4		4.32426e+06	-0.817445	-0.218985	-0.816741	0.104363	-0.733644	0.0376835
+	3.26984	0.763547	sp|Q15678|PTN14_HUMAN	PTPN14	Tyrosine-protein phosphatase non-receptor type 14			n[305]RHS[167]LEVMNSMVR	Color2 [DarkGray]	1	4		50672336	1.87146	2.43727	1.79166	2.60219	1.70239	2.61669
+	2.99385	0.76353	sp|Q7Z6J6|FRMD5_HUMAN	FRMD5	FERM domain-containing protein 5			n[305]SCPS[167]ITHGPR	Color2 [DarkGray]	1	4		3033997	-0.292764	0.356297	-0.51579	0.317426	-0.314169	0.494146
+	2.25825	0.763106	sp|P17844|DDX5_HUMAN	DDX5	Probable ATP-dependent RNA helicase DDX5			n[305]GYS[167]SLLK	Color2 [DarkGray]	1	4		5.0065e+06	0.51718	1.5921	0.753783	1.25961	0.831959	1.54053
+	2.15851	0.763101	sp|Q15035|TRAM2_HUMAN	TRAM2	Translocating chain-associated membrane protein 2			n[305]RES[167]GYHENGVVK	Color2 [DarkGray]	1	4		110414448	0.982697	2.09108	1.28643	1.67378	1.11142	1.90498
+	2.77973	0.763071	sp|Q9UJF2|NGAP_HUMAN	RASAL2	Ras GTPase-activating protein nGAP			n[305]LDRNT[181]SFR	Color2 [DarkGray]	1	4		3.89455e+06	-0.375185	0.576013	-0.317575	0.251416	-0.424082	0.344943
+	2.01794	0.762895	sp|O95544|NADK_HUMAN	NADK	NAD kinase			n[305]S[167]RSLSASPALGSTK	Color2 [DarkGray]	1	4		99811320	3.5236	4.49271	4.03018	4.55152	3.90011	4.69833
+	3.42268	0.762842	sp|Q14157|UBP2L_HUMAN	UBAP2L	Ubiquitin-associated protein 2-like			n[305]RY[243]PSSISSSPQK	Color2 [DarkGray]	1	4		11199538	0.120585	1.03517	0.344634	0.974507	0.215991	0.960062
+	2.55209	0.762772	sp|O60343|TBCD4_HUMAN	TBC1D4	TBC1 domain family member 4			n[305]RSLTSSLENIFS[167]R	Color2 [DarkGray]	1	4		37776956	-0.423899	0.30717	-0.219877	0.418376	-0.274727	0.644267
+	2.8183	0.762718	sp|P17844|DDX5_HUMAN	DDX5	Probable ATP-dependent RNA helicase DDX5			n[305]LLQLVEDRGS[167]GR	Color2 [DarkGray]	1	4		68536792	-0.630609	0.206283	-0.686276	-0.0493622	-0.567497	0.246852
+	2.31717	0.76255	sp|O60343|TBCD4_HUMAN	TBC1D4	TBC1 domain family member 4			n[305]T[181]SSTCSNESLSVGGTSVTPR	Color2 [DarkGray]	1	4		9714955	0.831494	1.25504	0.54462	1.36008	0.501333	1.54998
+	2.19286	0.762409	sp|P79522|PRR3_HUMAN	PRR3	Proline-rich protein 3			n[305]GWWGVNAEPPFPGPGHGGPT[181]RGSFHK	Color2 [DarkGray]	1	4		10894966	-0.0138264	0.855997	0.0804877	0.698191	-0.28174	0.517962
+	3.2027	0.761965	sp|Q9HB09|B2L12_HUMAN	BCL2L12	Bcl-2-like protein 12			n[305]LS[167]SDSFAR	Color2 [DarkGray]	1	4		5371304	-0.111253	0.703135	0.0350089	0.86399	0.0950394	0.737565
+	2.74344	0.761282	sp|Q9NXR1|NDE1_HUMAN	NDE1	Nuclear distribution protein nudE homolog 1			n[305]GPSSSLNTPGS[167]FRR	Color2 [DarkGray]	1	4		20483986	-0.887603	-0.0353975	-0.761939	-0.23307	-0.803743	0.0990295
+	1.81217	0.76127	sp|Q9BY77|PDIP3_HUMAN	POLDIP3	Polymerase delta-interacting protein 3			n[305]RVNS[167]ASSSNPPAEVDPDTILK	Color2 [DarkGray]	1	4		15260585	1.25113	2.18435	1.48821	2.3162	1.86325	2.38586
+	2.46958	0.761137	sp|O14777|NDC80_HUMAN	NDC80	Kinetochore protein NDC80 homolog			n[305]KVS[167]LFGK	Color2 [DarkGray]	1	4		11957431	1.1229	1.90285	1.29951	1.89729	1.31213	2.21782
+	2.12353	0.760973	sp|P08729|K2C7_HUMAN	KRT7	Keratin, type II cytoskeletal 7			n[305]LSSARPGGLGS[167]SSLYGLGASRPR	Color2 [DarkGray]	1	4		19277136	0.0452833	1.02794	0.497977	1.20441	0.413077	1.00691
+	2.25967	0.760883	sp|P62851|RS25_HUMAN	RPS25	40S ribosomal protein S25			n[305]IRGS[167]LAR	Color2 [DarkGray]	1	4		92616688	3.00169	3.84065	3.01899	3.72373	3.3134	4.05234
+	3.13793	0.760412	sp|Q96KB5|TOPK_HUMAN	PBK	Lymphokine-activated killer T-cell-originated protein kinase			n[305]S[167]VLCSTPTINIPASPFMQK	Color2 [DarkGray]	1	4		19049734	1.50142	2.32354	1.62453	2.2037	1.57649	2.45644
+	2.35815	0.76027	sp|O95747|OXSR1_HUMAN	OXSR1	Serine/threonine-protein kinase			n[305]VPGSS[167]GR	Color2 [DarkGray]	1	4		12783512	-0.110084	0.46681	-0.48092	0.337655	-0.286396	0.598945
+	1.98195	0.759641	sp|P35249|RFC4_HUMAN	RFC4	Replication factor C subunit 4			n[305]GT[181]SISTKPPLTK	Color2 [DarkGray]	1	4		2.62485e+06	-0.485997	0.416904	-0.366264	0.215489	-0.129277	0.664992
+	3.48532	0.759527	sp|Q15154|PCM1_HUMAN	PCM1	Pericentriolar material 1 protein			n[305]EVS[167]QSRKPS[167]ASERLPDEK	Color2 [DarkGray]	1	4		81020992	0.301993	1.23113	0.399924	1.03037	0.377459	1.09646
+	2.69092	0.759471	sp|Q9NZN8|CNOT2_HUMAN	CNOT2	CCR4-NOT transcription complex subunit 2			n[305]TNS[167]MSSSGLGSPNR	Color2 [DarkGray]	1	4		15331911	-0.28788	0.514515	-0.252301	0.36263	-0.536067	0.32502
+	1.56801	0.759086	sp|Q9ULF5|S39AA_HUMAN	SLC39A10	Zinc transporter ZIP10			n[305]QNT[181]EES[167]TIGR	Color2 [DarkGray]	1	4		2.603e+06	-1.80869	-0.790161	-1.15601	-0.882792	-1.47539	-0.489889
+	2.50604	0.758989	sp|Q15418|KS6A1_HUMAN	RPS6KA1	Ribosomal protein S6 kinase alpha-1			n[305]GFS[167]FVATGLM[147]EDDGKPR	Color2 [DarkGray]	1	4		5225383	-0.20543	0.402924	-0.351918	0.593087	-0.0481338	0.675474
[truncated: 5,242 more rows]
