# Supplementary material for: Machine learning-assisted elucidation of CD81–CD44 interactions in promoting cancer stemness and extracellular vesicle integrity
Source: eLife. 2022 Oct 4;11:e82669. doi: 10.7554/eLife.82669 (PMC9581534; doi:10.7554/eLife.82669)
Supplement: Supplementary file 5. [file elife-82669-supp5.xlsx]

## Sheet: Cluster_pathway
Supplementary file 5 (Table S3). siCD81-siCD44 Global G1-G6 Phospho P1-P6 Pathways
Cluster	Category	Term	Count	%	PValue	Genes	List Total	Pop Hits	Pop Total	Fold Enrichment	Bonferroni	Benjamini	FDR
Global 1	KEGG_PATHWAY	hsa03030:DNA replication	10	1.54321	4.79e-06	POLA1, FEN1, MCM7, LIG1, MCM3, MCM4, MCM5, MCM6, POLE, MCM2	258	36	6879	7.40633	0.00117215	0.00117283	0.00116805
Global 1	KEGG_PATHWAY	hsa04110:Cell cycle	15	2.31481	0.000199	ANAPC7, MCM7, CDC6, PKMYT1, SMC3, SMC1A, RBL1, CDC26, CHEK1, MCM3, MCM4, MCM5, MCM6, YWHAG, MCM2	258	124	6879	3.22534	0.0475438	0.0243531	0.0242537
Global 1	KEGG_PATHWAY	hsa00020:Citrate cycle (TCA cycle)	7	1.08025	0.000715	CS, FH, IDH3G, OGDH, DLAT, DLD, IDH3A	258	30	6879	6.22132	0.160723	0.0583838	0.0581455
Global 1	KEGG_PATHWAY	hsa01200:Carbon metabolism	13	2.00617	0.000983	GPI, FH, IDH3G, SHMT1, RPE, TALDO1, CS, GLUD1, ME1, OGDH, DLAT, DLD, IDH3A	258	113	6879	3.0674	0.214151	0.0602182	0.0599724
Global 1	KEGG_PATHWAY	hsa01130:Biosynthesis of antibiotics	18	2.77778	0.00234529	GPI, FH, IDH3G, SHMT1, RPE, TALDO1, AK3, UAP1, AK5, ZMPSTE24, NME1, ALDH3A2, CS, UAP1L1, OGDH, DLAT, DLD, IDH3A	258	212	6879	2.26382	0.437448	0.114919	0.11445
Global 1	KEGG_PATHWAY	hsa00620:Pyruvate metabolism	7	1.08025	0.00338143	ALDH3A2, FH, GLO1, ME1, ACYP1, DLAT, DLD	258	40	6879	4.66599	0.563887	0.138075	0.137512
Global 1	KEGG_PATHWAY	hsa04141:Protein processing in endoplasmic reticulum	15	2.31481	0.00418181	ERO1A, HSPA8, HSP90AA1, AMFR, PDIA6, HSP90B1, MAN1A2, DNAJC5, LMAN2, DNAJA2, ERP29, CAPN2, MAN1A1, RNF185, SEC63	258	169	6879	2.36652	0.64181	0.146363	0.145766
Global 1	KEGG_PATHWAY	hsa00670:One carbon pool by folate	5	0.771605	0.0057458	DHFR, MTHFD1L, MTHFD2, SHMT1, TYMS	258	20	6879	6.6657	0.756291	0.175965	0.175247
Global 1	KEGG_PATHWAY	hsa01100:Metabolic pathways	62	9.5679	0.00783726	GPI, PYGB, PIGT, UXS1, GBE1, APIP, LCLAT1, SPTLC2, MAN1A2, HYAL3, ME1, MAN1A1, DLAT, POLE, IDH3A, COX8A, CERS6, GLCE, CSGALNACT2, ALG5, TALDO1, ACSL4, DCK, NME1, ALDH3A2, MTHFD2, NDUFS6, DLD, MGLL, FH, DNMT1, SHMT1, RPE, UAP1, MAT2B, AK5, TYMS, UGT8, NT5E, MTHFD1L, GMDS, POLR2C, UAP1L1, ST3GAL6, NDUFV2, GGT5, RRM1, GK, IDH3G, MBOAT1, AKR1C3, SYNJ2, UCKL1, CS, DHFR, POLA1, GLUD1, GNPDA1, SYNJ1, ET…	258	1219	6879	1.35611	0.854516	0.213348	0.212477
Global 1	KEGG_PATHWAY	hsa00520:Amino sugar and nucleotide sugar metabolism	6	0.925926	0.0323999	GPI, GNPDA1, GMDS, UXS1, UAP1L1, UAP1	258	48	6879	3.33285	0.999687	0.706844	0.703959
Global 1	KEGG_PATHWAY	hsa03410:Base excision repair	5	0.771605	0.0332631	FEN1, LIG1, LIG3, HMGB1, POLE	258	33	6879	4.03982	0.999749	0.706844	0.703959
Global 1	KEGG_PATHWAY	hsa00240:Pyrimidine metabolism	9	1.38889	0.0346209	POLA1, RRM1, NT5E, POLR2C, TYMS, DCK, POLE, UCKL1, NME1	258	101	6879	2.37589	0.999822	0.706844	0.703959
Global 1	KEGG_PATHWAY	hsa01230:Biosynthesis of amino acids	7	1.08025	0.0514811	CS, IDH3G, SHMT1, RPE, TALDO1, MAT2B, IDH3A	258	72	6879	2.59222	0.999998	0.920281	0.916525
Global 1	KEGG_PATHWAY	hsa03060:Protein export	4	0.617284	0.0525875	IMMP2L, SRP54, SRP68, SEC63	258	23	6879	4.63701	0.999998	0.920281	0.916525
Global 1	KEGG_PATHWAY	hsa03450:Non-homologous end-joining	3	0.462963	0.0827152	FEN1, XRCC5, LIG4	258	13	6879	6.15295	1	1	1
Global 1	KEGG_PATHWAY	hsa05132:Salmonella infection	7	1.08025	0.0892738	KLC3, ARPC5L, ARPC4, CD14, RAC1, KLC1, MAPK13	258	83	6879	2.24867	1	1	1
Global 1	KEGG_PATHWAY	hsa05131:Shigellosis	6	0.925926	0.089955	CTTN, CHUK, ARPC5L, ARPC4, RAC1, MAPK13	258	64	6879	2.49964	1	1	1
	Category	Term	Count	%	PValue	Genes	List Total	Pop Hits	Pop Total	Fold Enrichment	Bonferroni	Benjamini	FDR
Global 2	KEGG_PATHWAY	hsa04142:Lysosome	13	3.07329	2.78148e-05	GAA, CTSZ, PLA2G15, GGA2, GALNS, GNPTG, GLB1, NEU1, CLTCL1, PPT1, TPP1, PPT2, LGMN	165	121	6879	4.47919	0.00579652	0.0058133	0.0058133
Global 2	KEGG_PATHWAY	hsa04710:Circadian rhythm	5	1.18203	0.00593104	PRKAB2, BHLHE40, CUL1, CSNK1E, CLOCK	165	31	6879	6.72434	0.711563	0.435929	0.435929
Global 2	KEGG_PATHWAY	hsa03013:RNA transport	11	2.60047	0.00787605	UPF2, NUP205, NUP188, XPO5, GEMIN4, STRAP, RGPD8, NUP98, TRNT1, RPP25L, RGPD3	165	172	6879	2.66628	0.808451	0.435929	0.435929
Global 2	KEGG_PATHWAY	hsa00511:Other glycan degradation	4	0.945626	0.00834314	NEU3, GLB1, NEU1, FUCA2	165	18	6879	9.26465	0.826405	0.435929	0.435929
Global 2	KEGG_PATHWAY	hsa04623:Cytosolic DNA-sensing pathway	6	1.41844	0.0178283	POLR3C, POLR3D, IL18, POLR3G, RELA, NFKB1	165	64	6879	3.90852	0.97671	0.660198	0.660198
Global 2	KEGG_PATHWAY	hsa05212:Pancreatic cancer	6	1.41844	0.0189531	CASP9, TGFB1, PIK3CD, RELA, EGFR, NFKB1	165	65	6879	3.84839	0.98167	0.660198	0.660198
Global 2	KEGG_PATHWAY	hsa04662:B cell receptor signaling pathway	6	1.41844	0.0239163	NFATC2, PIK3CD, PTPN6, BCL10, RELA, NFKB1	165	69	6879	3.6253	0.99365	0.714072	0.714072
Global 2	KEGG_PATHWAY	hsa04110:Cell cycle	8	1.89125	0.0283103	CCNA2, RBL2, WEE1, FZR1, TGFB1, ORC2, CUL1, CDC25A	165	124	6879	2.68974	0.997527	0.739608	0.739608
Global 2	KEGG_PATHWAY	hsa05134:Legionellosis	5	1.18203	0.0391698	CASP9, HSPA1L, IL18, RELA, NFKB1	165	54	6879	3.86027	0.999764	0.832132	0.832132
Global 2	KEGG_PATHWAY	hsa03020:RNA polymerase	4	0.945626	0.0398149	POLR3C, POLR3D, POLR1B, POLR3G	165	32	6879	5.21136	0.999795	0.832132	0.832132
Global 2	KEGG_PATHWAY	hsa05222:Small cell lung cancer	6	1.41844	0.0517433	CASP9, COL4A2, COL4A1, PIK3CD, RELA, NFKB1	165	85	6879	2.94289	0.999985	0.872519	0.872519
Global 2	KEGG_PATHWAY	hsa05164:Influenza A	9	2.12766	0.0557996	MAP2K3, CASP9, PRSS1, HSPA1L, IL18, PIK3CD, NUP98, RELA, NFKB1	165	174	6879	2.15643	0.999994	0.872519	0.872519
Global 2	KEGG_PATHWAY	hsa05161:Hepatitis B	8	1.89125	0.0577266	CASP9, CCNA2, TGFB1, SRC, NFATC2, PIK3CD, RELA, NFKB1	165	145	6879	2.30019	0.999996	0.872519	0.872519
Global 2	KEGG_PATHWAY	hsa05215:Prostate cancer	6	1.41844	0.0584462	CASP9, TCF7L1, PIK3CD, RELA, EGFR, NFKB1	165	88	6879	2.84256	0.999997	0.872519	0.872519
Global 2	KEGG_PATHWAY	hsa04932:Non-alcoholic fatty liver disease (NAFLD)	8	1.89125	0.0686891	MLXIP, COX7B, PRKAB2, TGFB1, NDUFS3, PIK3CD, RELA, NFKB1	165	151	6879	2.20879	1	0.908852	0.908852
Global 2	KEGG_PATHWAY	hsa05120:Epithelial cell signaling in Helicobacter pylori infection	5	1.18203	0.0751566	SRC, CSK, RELA, EGFR, NFKB1	165	67	6879	3.11126	1	0.908852	0.908852
Global 2	KEGG_PATHWAY	hsa04660:T cell receptor signaling pathway	6	1.41844	0.0899715	NFATC2, PIK3CD, PTPN6, BCL10, RELA, NFKB1	165	100	6879	2.50145	1	0.908852	0.908852
	Category	Term	Count	%	PValue	Genes	List Total	Pop Hits	Pop Total	Fold Enrichment	Bonferroni	Benjamini	FDR
Global 3	KEGG_PATHWAY	hsa03008:Ribosome biogenesis in eukaryotes	30	1.88679	1.64e-11	RBM28, POP5, NVL, HEATR1, NAT10, PWP2, RRP7A, EMG1, TCOF1, NOB1, BMS1, GAR1, RIOK1, UTP14A, MDN1, NOP56, UTP6, NOP58, IMP3, CSNK2A2, WDR75, IMP4, GNL2, UTP18, GTPBP4, LSG1, GNL3L, NHP2, MPHOSPH10, RPP25	564	87	6879	4.2058	4.4e-09	4.4e-09	4.34e-09
Global 3	KEGG_PATHWAY	hsa03040:Spliceosome	36	2.26415	2.38e-10	U2AF1L5, SF3B5, DDX5, DDX46, PRPF19, USP39, ZMAT2, U2AF2, SNRPD1, DHX38, HNRNPA1, SF3B1, CTNNBL1, SF3A3, RBM17, NCBP2, BUD31, THOC1, CDC5L, THOC3, PLRG1, CRNKL1, CDC40, CHERP, PRPF4, XAB2, PRPF6, SNW1, SYF2, SRSF2, SNRNP27, PRPF31, SRSF4, SNRNP200, SRSF7, RBM22	564	133	6879	3.30139	6.41e-08	3.21e-08	3.16e-08
Global 3	KEGG_PATHWAY	hsa00240:Pyrimidine metabolism	21	1.32075	0.000159	DUT, RRM2, PNPT1, NME2, DHODH, POLE4, NT5C3A, POLR3A, PNP, UCK1, POLR3B, NME6, POLR2B, POLR3E, POLE3, CMPK1, POLR3F, TK2, DCTPP1, POLR3K, POLR2K	564	101	6879	2.53597	0.0418529	0.0142502	0.0140383
Global 3	KEGG_PATHWAY	hsa04110:Cell cycle	23	1.44654	0.000397	CDKN1C, CDKN2D, HDAC2, YWHAB, TTK, CCNB2, STAG1, CDK7, ORC6, STAG2, TFDP1, CDC45, ESPL1, PTTG1, CHEK2, RAD21, CDK2, E2F3, E2F4, E2F5, TP53, MAD2L1, ANAPC2	564	124	6879	2.26231	0.10136	0.0267128	0.0263156
Global 3	KEGG_PATHWAY	hsa04919:Thyroid hormone signaling pathway	20	1.25786	0.00231264	MED1, HDAC2, PRKCA, PIK3R1, MED16, MED4, HIF1A, FOXO1, MED17, RXRB, MED14, PLCB3, KAT2A, MED24, MED13, SIN3A, MAPK1, HRAS, TP53, MAPK3	564	115	6879	2.12118	0.463571	0.12442	0.12257
Global 3	KEGG_PATHWAY	hsa03022:Basal transcription factors	11	0.691824	0.00287682	CDK7, TBP, TAF12, GTF2B, ERCC2, GTF2H1, TAF4, MNAT1, GTF2E1, GTF2F2, GTF2H5	564	45	6879	2.98144	0.539287	0.128977	0.12706
Global 3	KEGG_PATHWAY	hsa00564:Glycerophospholipid metabolism	17	1.06918	0.00409816	AGPAT5, CHKA, DGKA, MBOAT2, DGKZ, AGPAT2, PISD, AGPAT4, PGS1, PTDSS1, GPAT4, DGKQ, PEMT, GPAT3, CEPT1, LPIN1, CDIPT	564	95	6879	2.18259	0.66868	0.157486	0.155145
Global 3	KEGG_PATHWAY	hsa05220:Chronic myeloid leukemia	14	0.880503	0.00507352	STAT5A, STAT5B, HDAC2, SHC3, PTPN11, PIK3R1, GAB2, CBL, IKBKB, MAPK1, E2F3, HRAS, TP53, MAPK3	564	72	6879	2.3716	0.745448	0.170597	0.16806
Global 3	KEGG_PATHWAY	hsa05168:Herpes simplex infection	25	1.57233	0.0137881	SP100, IKBKB, MAP3K7, JUN, DAXX, TBP, MCRS1, CSNK2A2, TAP2, EIF2AK2, PTPN11, EIF2AK4, SRPK1, PER2, MAVS, CDK2, SRSF2, FAS, CYCS, SRSF4, TAB1, TAF4, SRSF7, TP53, TLR2	564	183	6879	1.66623	0.976122	0.40459	0.398573
Global 3	KEGG_PATHWAY	hsa05203:Viral carcinogenesis	27	1.69811	0.0159848	HDAC4, ATF2, SP100, HDAC2, ATF6B, YWHAB, SRF, TRADD, GTF2B, PIK3R1, RBPJ, HDAC9, GTF2E1, MAPK1, HRAS, MAPK3, STAT5A, STAT5B, JUN, TBP, EIF2AK2, GTF2H1, KAT2A, SNW1, RASA2, CDK2, TP53	564	205	6879	1.60641	0.986893	0.40459	0.398573
Global 3	KEGG_PATHWAY	hsa05211:Renal cell carcinoma	12	0.754717	0.0171739	EGLN1, PAK1, JUN, RAPGEF1, ARNT, MAPK1, PTPN11, PIK3R1, ETS1, HRAS, HIF1A, MAPK3	564	66	6879	2.2176	0.990533	0.40459	0.398573
Global 3	KEGG_PATHWAY	hsa00561:Glycerolipid metabolism	11	0.691824	0.0180486	AGPAT5, AGK, GPAT4, DGKA, DGKQ, MBOAT2, GPAT3, LPIN1, AGPAT2, DGKZ, AGPAT4	564	58	6879	2.31319	0.992549	0.40459	0.398573
Global 3	KEGG_PATHWAY	hsa00310:Lysine degradation	10	0.628931	0.0237008	KMT2E, KMT2D, COLGALT2, KMT2A, SETD1B, SETD7, SETDB2, DLST, KMT5A, CAMKMT	564	52	6879	2.34554	0.998423	0.490425	0.483132
Global 3	KEGG_PATHWAY	hsa05161:Hepatitis B	20	1.25786	0.0267581	STAT5A, ATF2, STAT5B, JUN, ATF6B, YWHAB, PRKCA, PIK3R1, IKBKB, MAVS, CASP10, CDK2, FAS, MAPK1, CYCS, E2F3, HRAS, TP53, TLR2, MAPK3	564	145	6879	1.68232	0.999322	0.493208	0.485874
Global 3	KEGG_PATHWAY	hsa01100:Metabolic pathways	118	7.42138	0.0285644	GALNT14, PANK2, DGKA, COX6A1, ENO2, GBA2, PNP, NAMPT, ACAA1, XYLB, GPT2, ALG14, SDHD, DGKZ, COX6B1, PISD, CYP27A1, DGKQ, CMPK1, SUCLG2, RPN2, MAOA, AK1, AK2, PGS1, PTDSS1, EBP, PMVK, INPP5K, COX11, ASL, ST3GAL1, ARSB, ATP6V0A1, FDFT1, CHKA, PMM1, SLC33A1, DHCR24, PYCR2, MCAT, COQ6, COQ5, SQLE, COQ3, GCLC, UCK1, STT3A, PEMT, ACADVL, PIGU, HIBADH, PIGO, ADPGK, HEXB, COX4I1, PIGQ, HEXA, ADK, KHK, IM…	564	1219	6879	1.18066	0.999589	0.493208	0.485874
Global 3	KEGG_PATHWAY	hsa00230:Purine metabolism	23	1.44654	0.0293358	RRM2, PNPT1, PDE1C, AK1, PDE2A, ADK, AK2, NME2, FHIT, ADCY6, POLE4, NT5C3A, NUDT9, POLR3A, PNP, POLR3B, NME6, POLR2B, POLR3E, POLE3, POLR3F, POLR3K, POLR2K	564	176	6879	1.5939	0.999668	0.493208	0.485874
Global 3	KEGG_PATHWAY	hsa03420:Nucleotide excision repair	9	0.566038	0.035049	POLE4, CDK7, RPA3, ERCC2, POLE3, RPA2, GTF2H1, MNAT1, GTF2H5	564	47	6879	2.33556	0.999932	0.517723	0.510025
Global 3	KEGG_PATHWAY	hsa01040:Biosynthesis of unsaturated fatty acids	6	0.377358	0.0352742	FADS2, ACOT7, SCD, SCD5, HACD3, ACAA1	564	23	6879	3.18178	0.999936	0.517723	0.510025
Global 3	KEGG_PATHWAY	hsa05223:Non-small cell lung cancer	10	0.628931	0.0365678	RXRB, MAPK1, PRKCA, E2F3, PIK3R1, FOXO3, FHIT, HRAS, TP53, MAPK3	564	56	6879	2.178	0.999956	0.517723	0.510025
Global 3	KEGG_PATHWAY	hsa04122:Sulfur relay system	4	0.251572	0.0423606	CTU1, NFS1, URM1, MOCS1	564	10	6879	4.87872	0.999991	0.544637	0.536539
Global 3	KEGG_PATHWAY	hsa03020:RNA polymerase	7	0.440252	0.0425182	POLR3A, POLR3B, POLR2B, POLR3E, POLR3F, POLR3K, POLR2K	564	32	6879	2.66805	0.999992	0.544637	0.536539
Global 3	KEGG_PATHWAY	hsa04668:TNF signaling pathway	15	0.943396	0.0528373	ATF2, JUN, ATF6B, TRADD, PIK3R1, RPS6KA4, IKBKB, RPS6KA5, CASP10, FAS, MAPK1, TAB1, MAP3K7, BIRC2, MAPK3	564	107	6879	1.70983	1	0.595331	0.586478
Global 3	KEGG_PATHWAY	hsa00511:Other glycan degradation	5	0.314465	0.0540229	HEXB, HEXA, MAN2B1, MAN2C1, GBA2	564	18	6879	3.388	1	0.595331	0.586478
Global 3	KEGG_PATHWAY	hsa04120:Ubiquitin mediated proteolysis	18	1.13208	0.0541712	PIAS4, UBE2I, PPIL2, CUL5, UBE2D4, FBXW8, FBXW7, UBE2D2, UBE4A, BRCA1, RNF7, UBE2G2, CBL, PRPF19, UBE2S, UBR5, BIRC2, ANAPC2	564	137	6879	1.6025	1	0.595331	0.586478
Global 3	KEGG_PATHWAY	hsa04070:Phosphatidylinositol signaling system	14	0.880503	0.0553281	DGKA, PRKCA, PIK3R1, DGKZ, PIKFYVE, PLCB3, IMPA1, IMPA2, DGKQ, INPP5K, PIP4K2C, IP6K1, CDIPT, IP6K2	564	98	6879	1.7424	1	0.595331	0.586478
Global 3	KEGG_PATHWAY	hsa00531:Glycosaminoglycan degradation	5	0.314465	0.0641694	IDUA, HEXB, HEXA, GUSB, ARSB	564	19	6879	3.20969	1	0.620396	0.611171
Global 3	KEGG_PATHWAY	hsa04722:Neurotrophin signaling pathway	16	1.00629	0.0642279	MAP3K3, JUN, SHC3, PRKCD, PTPN11, PIK3R1, FOXO3, IKBKB, RPS6KA5, RAPGEF1, MAPK1, HRAS, TP53, MAP2K5, SH2B1, MAPK3	564	120	6879	1.62624	1	0.620396	0.611171
Global 3	KEGG_PATHWAY	hsa03460:Fanconi anemia pathway	9	0.566038	0.0645765	EME2, RPA3, USP1, REV1, RPA2, SLX1A, BRCA1, POLK, FAN1	564	53	6879	2.07116	1	0.620396	0.611171
Global 3	KEGG_PATHWAY	hsa04142:Lysosome	16	1.00629	0.0680664	ASAH1, IDUA, HEXB, HEXA, M6PR, NAGA, NAGPA, CLN5, NPC2, AP1S2, DNASE2, MAN2B1, GUSB, ARSB, CTSB, ATP6V0A1	564	121	6879	1.6128	1	0.62111	0.611874
Global 3	KEGG_PATHWAY	hsa05169:Epstein-Barr virus infection	16	1.00629	0.0720552	JUN, HDAC2, TRADD, EIF2AK2, PIK3R1, RBPJ, NCOR2, IKBKB, PSMC5, SNW1, CDK2, VIM, TAB1, MAP3K7, TP53, CD44	564	122	6879	1.59958	1	0.62111	0.611874
Global 3	KEGG_PATHWAY	hsa05131:Shigellosis	10	0.628931	0.0749882	U2AF1L5, IKBKB, ELMO1, HCLS1, MAPK1, DOCK1, CD44, PFN2, ATG5, MAPK3	564	64	6879	1.90575	1	0.62111	0.611874
Global 3	KEGG_PATHWAY	hsa00100:Steroid biosynthesis	5	0.314465	0.0752366	SQLE, EBP, CYP51A1, DHCR24, FDFT1	564	20	6879	3.0492	1	0.62111	0.611874
Global 3	KEGG_PATHWAY	hsa04152:AMPK signaling pathway	16	1.00629	0.0761956	CRTC2, PFKFB3, STRADA, SCD5, TSC1, PIK3R1, PPP2R3A, HMGCR, FOXO3, FOXO1, CAMKK1, CAMKK2, PPP2R3C, SCD, RPS6KB2, MAP3K7	564	123	6879	1.58658	1	0.62111	0.611874
Global 3	KEGG_PATHWAY	hsa05221:Acute myeloid leukemia	9	0.566038	0.0838117	STAT5A, IKBKB, STAT5B, RPS6KB2, MAPK1, PIK3R1, HRAS, PPARD, MAPK3	564	56	6879	1.9602	1	0.663099	0.653238
Global 3	KEGG_PATHWAY	hsa01212:Fatty acid metabolism	8	0.503145	0.0936375	FADS2, ACADVL, SCD, SCD5, HACD3, ACAA1, ACADS, MCAT	564	48	6879	2.0328	1	0.719671	0.708969
Global 3	KEGG_PATHWAY	hsa04012:ErbB signaling pathway	12	0.754717	0.0966927	STAT5A, STAT5B, PAK1, JUN, SHC3, RPS6KB2, MAPK1, PRKCA, PIK3R1, CBL, HRAS, MAPK3	564	87	6879	1.68232	1	0.722509	0.711766
	Category	Term	Count	%	PValue	Genes	List Total	Pop Hits	Pop Total	Fold Enrichment	Bonferroni	Benjamini	FDR
Global 4	KEGG_PATHWAY	hsa03010:Ribosome	22	2.76382	1.65443e-05	RPL30, RPL10, RPS8, RPS6, RPL35A, MRPL15, MRPL21, MRPS18C, RPS14, MRPL2, RPS27, RPL18A, RPS29, RPL27A, RPL14, RPL35, RPL26, RPL37, RPL15, RPL29, RPS21, RPL19	383	136	6879	2.90543	0.00435821	0.00436769	0.00435115
Global 4	KEGG_PATHWAY	hsa04144:Endocytosis	28	3.51759	0.000353134	VPS29, TFRC, ARPC1A, CLTA, SNX3, SNX1, SNX2, KIF5B, LDLR, SMAD2, PDCD6IP, SMURF2, IQSEC1, CAV2, HLA-B, HLA-C, WWP1, TGFBR1, IGF2R, DNM1, ARFGAP1, TGFBR2, DNM2, RAB10, HGS, SMAP1, RAB7A, CHMP5	383	241	6879	2.08674	0.0890286	0.0466137	0.0464371
Global 4	KEGG_PATHWAY	hsa03050:Proteasome	10	1.25628	0.00057119	PSMD8, PSMA5, PSMA3, PSMD12, PSMB5, PSMA2, PSMB3, PSMD1, PSMB8, PSMA7	383	44	6879	4.08201	0.140012	0.0502647	0.0500743
Global 4	KEGG_PATHWAY	hsa03040:Spliceosome	16	2.01005	0.00667637	RBM25, SF3A2, SRSF1, HNRNPU, WBP11, LSM4, U2SURP, PQBP1, PHF5A, SNRPD2, PRPF3, MAGOH, DHX15, SRSF5, SNRPA, SRSF9	383	133	6879	2.1607	0.829406	0.440023	0.438357
Global 4	KEGG_PATHWAY	hsa05230:Central carbon metabolism in cancer	10	1.25628	0.00833378	NRAS, PGAM4, PIK3R2, RAF1, MET, PFKM, PFKP, GLS, HK1, PDK1	383	64	6879	2.80638	0.890226	0.440023	0.438357
Global 4	KEGG_PATHWAY	hsa04360:Axon guidance	15	1.88442	0.0104769	ITGB1, SEMA4D, SEMA3C, SEMA3A, L1CAM, GNAI2, PPP3CB, NRAS, CFL2, CFL1, FYN, SLIT2, MET, EPHB3, EPHA2	383	127	6879	2.12136	0.937992	0.460983	0.459237
Global 4	KEGG_PATHWAY	hsa00532:Glycosaminoglycan biosynthesis - chondroitin sulfate / dermatan sulfate	5	0.628141	0.022333	CHST7, CHST11, CHSY1, B3GALT6, CHST3	383	20	6879	4.49021	0.997427	0.631793	0.6294
Global 4	KEGG_PATHWAY	hsa05110:Vibrio cholerae infection	8	1.00503	0.0237791	ATP6V1A, SLC12A2, ADCY9, ATP6AP1, ATP6V1B2, ATP6V0A4, PLCG1, ATP6V1C1	383	52	6879	2.76321	0.998259	0.631793	0.6294
Global 4	KEGG_PATHWAY	hsa05166:HTLV-I infection	23	2.88945	0.024712	SMAD2, TGFB2, FZD2, FZD6, HLA-B, HLA-C, FZD8, PIK3R2, TGFBR1, TGFBR2, TNFRSF1A, POLD3, CDC20, KAT2B, PPP3CB, NRAS, ADCY9, CDK4, VDAC3, VDAC1, LTBR, JAK1, SLC25A6	383	254	6879	1.62637	0.998648	0.631793	0.6294
Global 4	KEGG_PATHWAY	hsa05212:Pancreatic cancer	9	1.13065	0.0265024	SMAD2, TGFB2, CDK4, TGFA, PIK3R2, RAF1, TGFBR1, JAK1, TGFBR2	383	65	6879	2.48688	0.999167	0.631793	0.6294
Global 4	KEGG_PATHWAY	hsa05100:Bacterial invasion of epithelial cells	10	1.25628	0.0280318	ITGB1, CAV2, ARPC1A, FN1, CLTA, ILK, PIK3R2, MET, DNM1, DNM2	383	78	6879	2.30267	0.99945	0.631793	0.6294
Global 4	KEGG_PATHWAY	hsa03015:mRNA surveillance pathway	11	1.38191	0.0287179	PNN, HBS1L, NXT1, PPP2R5E, RNMT, MAGOH, PYM1, PPP2R5A, UPF3B, PABPC1, SMG7	383	91	6879	2.17109	0.999544	0.631793	0.6294
Global 4	KEGG_PATHWAY	hsa05120:Epithelial cell signaling in Helicobacter pylori infection	9	1.13065	0.0311388	LYN, ATP6V1A, ATP6AP1, ATP6V1B2, ADAM10, ATP6V0A4, PLCG1, MET, ATP6V1C1	383	67	6879	2.41265	0.999764	0.632356	0.629961
Global 4	KEGG_PATHWAY	hsa04066:HIF-1 signaling pathway	11	1.38191	0.0395616	TFRC, IFNGR1, RPS6, EIF4EBP1, HMOX1, PIK3R2, PLCG1, LTBR, HK1, RBX1, PDK1	383	96	6879	2.05801	0.999976	0.746018	0.743192
Global 4	KEGG_PATHWAY	hsa05205:Proteoglycans in cancer	18	2.26131	0.0519507	ITGB1, TGFB2, FZD2, PDPK1, CAV2, SDC2, FZD6, RPS6, FN1, FZD8, PIK3R2, NRAS, TIMP3, PLCG1, EZR, RAF1, MET, EIF4B	383	200	6879	1.61648	0.999999	0.903618	0.900195
Global 4	KEGG_PATHWAY	hsa05210:Colorectal cancer	8	1.00503	0.0547647	SMAD2, TGFB2, MSH2, PIK3R2, RAF1, TGFBR1, TGFBR2, APPL1	383	62	6879	2.31753	1	0.903618	0.900195
Global 4	KEGG_PATHWAY	hsa04721:Synaptic vesicle cycle	8	1.00503	0.0588142	ATP6V1A, STXBP1, ATP6V1B2, CLTA, ATP6V0A4, ATP6V1C1, DNM1, DNM2	383	63	6879	2.28074	1	0.913349	0.90989
Global 4	KEGG_PATHWAY	hsa04071:Sphingolipid signaling pathway	12	1.50754	0.068865	CERS5, NRAS, SPTLC1, PDPK1, PPP2R5E, PPP2R5A, PIK3R2, FYN, SGMS2, RAF1, GNAI2, TNFRSF1A	383	120	6879	1.79608	1	0.994455	0.990688
Global 4	KEGG_PATHWAY	hsa00030:Pentose phosphate pathway	5	0.628141	0.0742477	PRPS1, PGD, TKT, PFKM, PFKP	383	29	6879	3.0967	1	0.994455	0.990688
Global 4	KEGG_PATHWAY	hsa04120:Ubiquitin mediated proteolysis	13	1.63317	0.0776951	SMURF2, FBXW11, WWP1, UBE3A, MID1, RBX1, CUL4A, CDC20, HERC3, UBE2Q1, UBE2R2, UBA3, UBE2M	383	137	6879	1.70431	1	0.994455	0.990688
Global 4	KEGG_PATHWAY	hsa04152:AMPK signaling pathway	12	1.50754	0.0791044	RAB10, CAB39, PDPK1, PPP2R5E, RHEB, CREB3L2, EIF4EBP1, PPP2R5A, PIK3R2, ELAVL1, PFKM, PFKP	383	123	6879	1.75228	1	0.994455	0.990688
Global 4	KEGG_PATHWAY	hsa05223:Non-small cell lung cancer	7	0.879397	0.0886578	NRAS, PDPK1, CDK4, TGFA, PIK3R2, PLCG1, RAF1	383	56	6879	2.2451	1	1	1
Global 4	KEGG_PATHWAY	hsa04350:TGF-beta signaling pathway	9	1.13065	0.0934431	SMAD2, TGFB2, SMURF2, BAMBI, NOG, LTBP1, TGFBR1, TGFBR2, RBX1	383	84	6879	1.92438	1	1	1
Global 4	KEGG_PATHWAY	hsa04514:Cell adhesion molecules (CAMs)	13	1.63317	0.0954325	ITGB1, SDC2, SDC3, HLA-B, HLA-C, L1CAM, PVR, PTPRF, GLG1, MAG, OCLN, ALCAM, CD276	383	142	6879	1.6443	1	1	1
	Category	Term	Count	%	PValue	Genes	List Total	Pop Hits	Pop Total	Fold Enrichment	Bonferroni	Benjamini	FDR
Global 5	KEGG_PATHWAY	hsa04144:Endocytosis	25	2.92056	0.00212857	WIPF2, ASAP3, SNX12, ASAP1, AGAP3, SNX4, GRK5, VPS35, LDLRAP1, AP2M1, SNX6, RAB4A, IST1, VTA1, VPS37A, HLA-A, AP2B1, ARFGAP3, RAB11A, ARFGAP2, RAB11B, RUFY1, PARD3, VPS45, STAM2	367	241	6879	1.94438	0.430241	0.561943	0.561943
Global 5	KEGG_PATHWAY	hsa00410:beta-Alanine metabolism	7	0.817757	0.00516144	ECHS1, ALDH1B1, ALDH3B1, ACADM, MLYCD, SRM, CNDP2	367	31	6879	4.23249	0.744912	0.68131	0.68131
Global 5	KEGG_PATHWAY	hsa04610:Complement and coagulation cascades	10	1.16822	0.0103529	THBD, F9, CFH, F2R, PLG, CD46, F3, KNG1, CD55, F5	367	69	6879	2.7165	0.935907	0.715563	0.715563
Global 5	KEGG_PATHWAY	hsa05162:Measles	15	1.75234	0.0108419	STAT1, MX1, EIF2AK3, TYK2, CCND3, TBK1, CDK6, CCNE2, OAS2, OAS3, RAB9A, TAB2, CD46, IRF9, IFNAR1	367	133	6879	2.11397	0.943746	0.715563	0.715563
Global 5	KEGG_PATHWAY	hsa00532:Glycosaminoglycan biosynthesis - chondroitin sulfate / dermatan sulfate	5	0.584112	0.0193832	CHPF, CHPF2, B3GAT3, CHST15, CHSY3	367	20	6879	4.68597	0.994301	1	1
Global 5	KEGG_PATHWAY	hsa04510:Focal adhesion	19	2.21963	0.0255848	PDGFRB, PPP1R12A, ITGB5, LAMB2, PTEN, LAMC1, THBS1, MYL12B, DIAPH1, VTN, CCND3, COL5A1, PDGFC, ERBB2, ITGB8, PAK6, ITGAV, TLN1, MYL9	367	206	6879	1.7288	0.998932	1	1
Global 5	KEGG_PATHWAY	hsa05168:Herpes simplex infection	17	1.98598	0.0339196	STAT1, EIF2AK3, HLA-A, TYK2, IFIT1, ARNTL, NXF1, CDC34, CASP8, TBK1, OAS2, OAS3, TAB2, IRF9, NECTIN2, SKP1, IFNAR1	367	183	6879	1.74123	0.999889	1	1
Global 5	KEGG_PATHWAY	hsa00280:Valine, leucine and isoleucine degradation	7	0.817757	0.0369986	ECHS1, AUH, ALDH1B1, BCKDHB, ACADM, BCAT1, AACS	367	47	6879	2.79164	0.999952	1	1
Global 5	KEGG_PATHWAY	hsa04330:Notch signaling pathway	7	0.817757	0.0404679	LFNG, NOTCH2, APH1B, DTX3L, DVL2, DTX2, MAML3	367	48	6879	2.73348	0.999982	1	1
Global 5	KEGG_PATHWAY	hsa04512:ECM-receptor interaction	10	1.16822	0.0408455	VTN, COL5A1, ITGB5, LAMB2, ITGB8, ITGAV, LAMC1, AGRN, THBS1, HSPG2	367	87	6879	2.15447	0.999983	1	1
Global 5	KEGG_PATHWAY	hsa00480:Glutathione metabolism	7	0.817757	0.0520801	GSTM4, G6PD, GPX4, GPX8, GSTT2, GGT1, SRM	367	51	6879	2.57269	0.999999	1	1
Global 5	KEGG_PATHWAY	hsa04141:Protein processing in endoplasmic reticulum	15	1.75234	0.0655313	SEC23A, SAR1A, SEL1L, EIF2AK3, YOD1, NSFL1C, ERLEC1, LMAN1, PLAA, BAK1, SEC24D, SEC23B, MBTPS2, SKP1, SEC31A	367	169	6879	1.66366	1	1	1
Global 5	KEGG_PATHWAY	hsa00770:Pantothenate and CoA biosynthesis	4	0.46729	0.0673228	PANK4, PPCS, BCAT1, PPCDC	367	18	6879	4.1653	1	1	1
Global 5	KEGG_PATHWAY	hsa00512:Mucin type O-Glycan biosynthesis	5	0.584112	0.0799386	GALNT5, GALNT3, GALNT2, C1GALT1, GCNT1	367	31	6879	3.0232	1	1	1
Global 5	KEGG_PATHWAY	hsa00562:Inositol phosphate metabolism	8	0.934579	0.0821123	ISYNA1, INPP5A, ITPK1, PTEN, PI4KA, INPPL1, PIP4K2A, MTMR4	367	71	6879	2.11199	1	1	1
Global 5	KEGG_PATHWAY	hsa03050:Proteasome	6	0.700935	0.0824609	PSMC6, PSMA1, POMP, PSME1, PSME2, PSMB9	367	44	6879	2.55598	1	1	1
Global 5	KEGG_PATHWAY	hsa01100:Metabolic pathways	76	8.8785	0.089104	PANK4, B4GALT3, MOCS2, DGKD, B4GALT1, ACY1, CHPF, MPI, PPCDC, CNDP2, NDST1, NSDHL, AUH, SPR, SMPD1, ACADM, MLYCD, GGT1, GLUL, ATP6V1G1, G6PD, ALG9, CHPF2, OXSM, BCKDHB, ITPK1, DNMT3A, CTPS2, SDHB, HMBS, BCAT1, UMPS, GART, ATP6V0D2, GNE, LIPT2, LIPT1, ISYNA1, DTYMK, AHCY, ECHS1, GCNT1, MTMR4, PAPSS2, SRM, EXTL2, TKFC, INPP5A, ALDH1B1, HLCS, PPCS, ALDH3B1, ATP6V0A2, CHSY3, CYC1, ACSS1, RIMKLB, NADK…	367	1219	6879	1.16861	1	1	1
Global 5	KEGG_PATHWAY	hsa01130:Biosynthesis of antibiotics	17	1.98598	0.0988783	G6PD, ISYNA1, ECHS1, GOT1, ACY1, GFPT1, BCKDHB, SDHB, PAPSS2, PAFAH2, NSDHL, ALDH1B1, CAT, ACADM, BCAT1, ACSS1, GART	367	212	6879	1.50305	1	1	1
	Category	Term	Count	%	PValue	Genes	List Total	Pop Hits	Pop Total	Fold Enrichment	Bonferroni	Benjamini	FDR
Global 6	KEGG_PATHWAY	hsa01100:Metabolic pathways	48	11.2412	0.000894963	MTMR3, H6PD, NNMT, COX15, CPOX, NT5C2, SDSL, AGPAT1, PLD3, AGPAT3, THTPA, POLD4, SCP2, FPGT, GMPPA, ATP6V1H, PGLS, LTA4H, ATP6V1E1, PGM1, GGPS1, MMAB, CAD, PMM2, PYCR1, NME3, AMPD2, MOGS, ALG12, PRDX6, GANC, APRT, ALDH4A1, GALC, QDPR, DPM1, DPM3, ALDH5A1, B4GAT1, DPYD, SARDH, ALDOC, ACO2, B4GALT7, ACOT4, ADA, GALK1, ALDH9A1	172	1219	6879	1.57483	0.176584	0.194207	0.194207
Global 6	KEGG_PATHWAY	hsa00030:Pentose phosphate pathway	5	1.17096	0.0053881	H6PD, ALDOC, PGLS, RBKS, PGM1	172	29	6879	6.89555	0.690371	0.584609	0.584609
Global 6	KEGG_PATHWAY	hsa04066:HIF-1 signaling pathway	8	1.87354	0.00967021	IL6, CDKN1B, RPS6KB1, AKT3, STAT3, SERPINE1, TLR4, IGF1R	172	96	6879	3.33285	0.878598	0.699478	0.699478
Global 6	KEGG_PATHWAY	hsa04012:ErbB signaling pathway	7	1.63934	0.0207953	CDKN1B, RPS6KB1, BAD, AKT3, GAB1, CRK, PTK2	172	87	6879	3.21792	0.98954	0.83291	0.83291
Global 6	KEGG_PATHWAY	hsa05202:Transcriptional misregulation in cancer	10	2.34192	0.023195	IL6, CDKN1B, SPINT1, CCNT1, PRCC, DOT1L, ATM, KLF3, PTK2, IGF1R	172	167	6879	2.39486	0.993858	0.83291	0.83291
Global 6	KEGG_PATHWAY	hsa03015:mRNA surveillance pathway	7	1.63934	0.0253289	NCBP1, CSTF3, CPSF3, SSU72, CSTF2T, PPP2R2A, NXT2	172	91	6879	3.07648	0.996179	0.83291	0.83291
Global 6	KEGG_PATHWAY	hsa05161:Hepatitis B	9	2.10773	0.0276941	IL6, CDKN1B, IRF3, BAD, CREB3L1, STAT2, AKT3, STAT3, TLR4	172	145	6879	2.4824	0.997745	0.83291	0.83291
Global 6	KEGG_PATHWAY	hsa00520:Amino sugar and nucleotide sugar metabolism	5	1.17096	0.0307064	FPGT, GMPPA, PMM2, PGM1, GALK1	172	48	6879	4.16606	0.99885	0.83291	0.83291
Global 6	KEGG_PATHWAY	hsa04144:Endocytosis	12	2.8103	0.0373581	PARD6B, ARF1, RAB5B, RAB11FIP1, GRK6, GBF1, AP2A1, VPS26A, VPS26B, FOLR1, GIT1, IGF1R	172	241	6879	1.99141	0.999742	0.85956	0.85956
Global 6	KEGG_PATHWAY	hsa00310:Lysine degradation	5	1.17096	0.0396111	SUV39H2, SETDB1, KMT2C, DOT1L, ALDH9A1	172	52	6879	3.84559	0.999845	0.85956	0.85956
Global 6	KEGG_PATHWAY	hsa00051:Fructose and mannose metabolism	4	0.936768	0.0441961	FPGT, GMPPA, PMM2, ALDOC	172	32	6879	4.99927	0.999945	0.871868	0.871868
Global 6	KEGG_PATHWAY	hsa00250:Alanine, aspartate and glutamate metabolism	4	0.936768	0.0552841	ALDH4A1, ALDH5A1, CAD, NIT2	172	35	6879	4.57076	0.999996	0.999721	0.999721
Global 6	KEGG_PATHWAY	hsa00230:Purine metabolism	9	2.10773	0.0727315	POLD4, CANT1, PDE10A, NME3, AMPD2, NT5C2, ADA, PGM1, APRT	172	176	6879	2.04516	1	1	1
Global 6	KEGG_PATHWAY	hsa04145:Phagosome	8	1.87354	0.0795534	DYNC1LI2, RAB5B, TUBB2A, ITGB3, ATP6V1H, ATP6V1E1, TLR4, TUBA4A	172	150	6879	2.13302	1	1	1
Global 6	KEGG_PATHWAY	hsa01130:Biosynthesis of antibiotics	10	2.34192	0.0813049	GGPS1, NME3, PYCR1, ALDOC, AMPD2, ACO2, PGLS, SDSL, PGM1, ALDH9A1	172	212	6879	1.88652	1	1	1
Global 6	KEGG_PATHWAY	hsa00860:Porphyrin and chlorophyll metabolism	4	0.936768	0.0856736	MMAB, COX15, CPOX, BLVRA	172	42	6879	3.80897	1	1	1
Phosphoproteome Pathways
	Category	Term	Count	%	PValue	Genes	List Total	Pop Hits	Pop Total	Fold Enrichment	Bonferroni	Benjamini	FDR
Phospho 1	KEGG_PATHWAY	hsa03040:Spliceosome	9	3.05085	0.000503	RBM17, RBMXL1, PHF5A, DHX8, SNRNP70, TRA2B, SRSF2, DDX42, SRSF4	97	133	6879	4.79893	0.0604378	0.0623256	0.0623256
Phospho 1	KEGG_PATHWAY	hsa05168:Herpes simplex infection	8	2.71186	0.0137024	SP100, CASP8, MCRS1, CSNK2A2, SRSF2, SRSF4, EIF2AK4, GTF2I	97	183	6879	3.10022	0.819286	0.849547	0.849547
Phospho 1	KEGG_PATHWAY	hsa03013:RNA transport	7	2.37288	0.0326584	RANBP2, POM121, TPR, EIF4EBP1, RANGAP1, EIF3A, EIF4B	97	172	6879	2.88618	0.983711	1	1
Phospho 1	KEGG_PATHWAY	hsa03008:Ribosome biogenesis in eukaryotes	5	1.69492	0.0329058	TCOF1, DKC1, BMS1, CSNK2A2, UTP14A	97	87	6879	4.07572	0.984219	1	1
Phospho 1	KEGG_PATHWAY	hsa04150:mTOR signaling pathway	4	1.35593	0.0468287	AKT1S1, EIF4EBP1, RICTOR, EIF4B	97	58	6879	4.89086	0.997387	1	1
Phospho 1	KEGG_PATHWAY	hsa04144:Endocytosis	8	2.71186	0.0507402	ZFYVE16, IQSEC1, PARD3, NEDD4L, ASAP1, EPS15L1, ARAP1, CHMP7	97	241	6879	2.35411	0.998431	1	1
Phospho 1	KEGG_PATHWAY	hsa04520:Adherens junction	4	1.35593	0.076361	AFDN, PARD3, CSNK2A2, BAIAP2	97	71	6879	3.99535	0.999947	1	1
Phospho 1	KEGG_PATHWAY	hsa04152:AMPK signaling pathway	5	1.69492	0.0925331	EEF2K, AKT1S1, EIF4EBP1, IRS2, EEF2	97	123	6879	2.88283	0.999994	1	1
	Category	Term	Count	%	PValue	Genes	List Total	Pop Hits	Pop Total	Fold Enrichment	Bonferroni	Benjamini	FDR
Phospho 2	KEGG_PATHWAY	hsa04144:Endocytosis	7	3.30189	0.0420162	WIPF1, PARD3, ARPC1A, AP2A1, RAB8A, HSPA1A, PLD2	74	241	6879	2.70007	0.991474	1	1
Phospho 2	KEGG_PATHWAY	hsa04110:Cell cycle	5	2.35849	0.042232	TFDP1, RBL1, PKMYT1, MAD2L1, MCM2	74	124	6879	3.74837	0.991684	1	1
Phospho 2	KEGG_PATHWAY	hsa03410:Base excision repair	3	1.41509	0.0474678	FEN1, LIG1, LIG3	74	33	6879	8.45086	0.995475	1	1
Phospho 2	KEGG_PATHWAY	hsa03030:DNA replication	3	1.41509	0.0555051	FEN1, LIG1, MCM2	74	36	6879	7.74662	0.998233	1	1
Phospho 2	KEGG_PATHWAY	hsa05132:Salmonella infection	4	1.88679	0.0576725	DYNC1LI1, ARPC1A, FLNA, PKN1	74	83	6879	4.47997	0.998631	1	1
Phospho 2	KEGG_PATHWAY	hsa00564:Glycerophospholipid metabolism	4	1.88679	0.0795265	PTDSS1, MBOAT1, LPIN1, PLD2	74	95	6879	3.91408	0.999899	1	1
	Category	Term	Count	%	PValue	Genes	List Total	Pop Hits	Pop Total	Fold Enrichment	Bonferroni	Benjamini	FDR
Phospho 3	KEGG_PATHWAY	hsa04144:Endocytosis	9	6.08108	0.000755413	RAB11FIP1, IQSEC2, PARD3, ASAP3, SNX12, WASL, CBL, RAB11FIP5, EPN2	58	241	6879	4.42917	0.0825431	0.0861171	0.0861171
Phospho 3	KEGG_PATHWAY	hsa04012:ErbB signaling pathway	5	3.37838	0.00566223	ARAF, GAB1, EIF4EBP1, CBL, PTK2	58	87	6879	6.81629	0.476558	0.322747	0.322747
Phospho 3	KEGG_PATHWAY	hsa03013:RNA transport	6	4.05405	0.0135305	NUP107, NCBP1, EIF4EBP1, EIF4EBP2, RNPS1, EIF2S2	58	172	6879	4.13733	0.788391	0.514161	0.514161
Phospho 3	KEGG_PATHWAY	hsa05205:Proteoglycans in cancer	6	4.05405	0.0243639	STAT3, ARAF, GAB1, FLNB, CBL, PTK2	58	200	6879	3.5581	0.939908	0.603839	0.603839
Phospho 3	KEGG_PATHWAY	hsa05100:Bacterial invasion of epithelial cells	4	2.7027	0.0264842	GAB1, WASL, CBL, PTK2	58	78	6879	6.08223	0.953107	0.603839	0.603839
Phospho 3	KEGG_PATHWAY	hsa04145:Phagosome	5	3.37838	0.0351634	TUBA1C, STX12, DYNC1LI2, TUBA1B, ATP6V0A2	58	150	6879	3.95345	0.983106	0.668105	0.668105
Phospho 3	KEGG_PATHWAY	hsa05130:Pathogenic Escherichia coli infection	3	2.02703	0.0664355	TUBA1C, TUBA1B, WASL	58	51	6879	6.97667	0.999605	1	1
Phospho 3	KEGG_PATHWAY	hsa05221:Acute myeloid leukemia	3	2.02703	0.0781898	STAT3, ARAF, EIF4EBP1	58	56	6879	6.35376	0.999907	1	1
Phospho 3	KEGG_PATHWAY	hsa03040:Spliceosome	4	2.7027	0.0974441	NCBP1, TRA2B, TRA2A, PRPF40A	58	133	6879	3.56702	0.999992	1	1
	Category	Term	Count	%	PValue	Genes	List Total	Pop Hits	Pop Total	Fold Enrichment	Bonferroni	Benjamini	FDR
Phospho 4	KEGG_PATHWAY	hsa04070:Phosphatidylinositol signaling system	3	5.26316	0.0323107	PIKFYVE, ITPR3, SYNJ2	21	98	6879	10.0277	0.869495	1	1
	Category	Term	Count	%	PValue	Genes	List Total	Pop Hits	Pop Total	Fold Enrichment	Bonferroni	Benjamini	FDR
Phospho 5	KEGG_PATHWAY	hsa04144:Endocytosis	14	4.04624	0.000549073	GIT2, IQSEC2, CAV2, GBF1, AP2A1, ARFGAP1, DNM1, PARD3, PSD3, GRK6, MVB12A, EPS15, GIT1, RAB11FIP5	130	241	6879	3.07392	0.0821111	0.0856554	0.0856554
Phospho 5	KEGG_PATHWAY	hsa03013:RNA transport	10	2.89017	0.00486494	NUP93, NDC1, RANBP2, PNN, EIF5B, ACIN1, EIF4EBP2, SMN1, SRRM1, EIF4G1	130	172	6879	3.07648	0.5327	0.379465	0.379465
Phospho 5	KEGG_PATHWAY	hsa05412:Arrhythmogenic right ventricular cardiomyopathy (ARVC)	5	1.44509	0.0365299	ITGB1, DSP, DAG1, CTNNB1, ITGA6	130	67	6879	3.94891	0.996989	1	1
Phospho 5	KEGG_PATHWAY	hsa04510:Focal adhesion	9	2.60116	0.0393246	ITGB1, CAV2, CTNNB1, PAK6, ITGA6, TLN1, ARHGAP5, THBS1, VCL	130	206	6879	2.31184	0.998086	1	1
Phospho 5	KEGG_PATHWAY	hsa04015:Rap1 signaling pathway	9	2.60116	0.0432537	MAGI1, ITGB1, PARD3, CTNNB1, RAPGEF2, SIPA1L2, TLN1, THBS1, EPHA2	130	210	6879	2.2678	0.99899	1	1
Phospho 5	KEGG_PATHWAY	hsa04120:Ubiquitin mediated proteolysis	7	2.02312	0.0434412	CDC20, FBXW11, HUWE1, UBE2O, STUB1, TRIP12, ANAPC2	130	137	6879	2.70371	0.99902	1	1
Phospho 5	KEGG_PATHWAY	hsa05100:Bacterial invasion of epithelial cells	5	1.44509	0.0582313	ITGB1, CAV2, CTNNB1, VCL, DNM1	130	78	6879	3.39201	0.999914	1	1
Phospho 5	KEGG_PATHWAY	hsa04110:Cell cycle	6	1.7341	0.0830239	CDC20, CDKN1B, MCM7, PLK1, SFN, ANAPC2	130	124	6879	2.56042	0.999999	1	1
	Category	Term	Count	%	PValue	Genes	List Total	Pop Hits	Pop Total	Fold Enrichment	Bonferroni	Benjamini	FDR
Phospho 6	KEGG_PATHWAY	hsa04144:Endocytosis	13	5.70175	0.00021394	IQSEC2, GBF1, ASAP1, VPS26A, EPN1, PML, TGFBR2, SNX4, PARD6B, RAB11FIP1, PARD3, PIP5K1A, RAB11FIP5	103	241	6879	3.60259	0.0375752	0.0382952	0.0382952
Phospho 6	KEGG_PATHWAY	hsa04015:Rap1 signaling pathway	10	4.38596	0.00380572	TIAM1, MAP2K1, PARD6B, ADCY9, PARD3, GNAI3, BRAF, TLN1, THBS1, ACTB	103	210	6879	3.18031	0.494659	0.340612	0.340612
Phospho 6	KEGG_PATHWAY	hsa04150:mTOR signaling pathway	5	2.19298	0.0104777	RRAGC, IRS1, TSC1, BRAF, ULK1	103	58	6879	5.75745	0.848233	0.471567	0.471567
Phospho 6	KEGG_PATHWAY	hsa04810:Regulation of actin cytoskeleton	9	3.94737	0.0124182	TIAM1, MAP2K1, PPP1R12A, APC, PIP5K1A, BRAF, VCL, ACTB, SSH1	103	210	6879	2.86227	0.893197	0.471567	0.471567
Phospho 6	KEGG_PATHWAY	hsa05210:Colorectal cancer	5	2.19298	0.0131723	MSH6, MAP2K1, APC, BRAF, TGFBR2	103	62	6879	5.386	0.906846	0.471567	0.471567
Phospho 6	KEGG_PATHWAY	hsa05205:Proteoglycans in cancer	8	3.50877	0.0285883	TIAM1, MAP2K1, PPP1R12A, BRAF, PTPN11, FLNB, THBS1, ACTB	103	200	6879	2.67146	0.994438	0.819888	0.819888
Phospho 6	KEGG_PATHWAY	hsa04510:Focal adhesion	8	3.50877	0.0328454	MAP2K1, PPP1R12A, BRAF, FLNB, TLN1, THBS1, VCL, ACTB	103	206	6879	2.59365	0.997466	0.819888	0.819888
Phospho 6	KEGG_PATHWAY	hsa04530:Tight junction	5	2.19298	0.0397875	PARD6B, PARD3, CGN, CLDN2, ACTB	103	87	6879	3.8383	0.999302	0.819888	0.819888
Phospho 6	KEGG_PATHWAY	hsa04540:Gap junction	5	2.19298	0.0412234	MAP2K1, TUBA1B, ADCY9, TUBB, GNAI3	103	88	6879	3.79468	0.999466	0.819888	0.819888
Phospho 6	KEGG_PATHWAY	hsa05216:Thyroid cancer	3	1.31579	0.0682233	MAP2K1, NCOA4, BRAF	103	29	6879	6.90894	0.999997	0.948627	0.948627
Phospho 6	KEGG_PATHWAY	hsa05230:Central carbon metabolism in cancer	4	1.75439	0.0689203	MAP2K1, PDHA1, SLC2A1, PFKP	103	64	6879	4.17415	0.999997	0.948627	0.948627
Phospho 6	KEGG_PATHWAY	hsa05211:Renal cell carcinoma	4	1.75439	0.0741373	MAP2K1, SLC2A1, BRAF, PTPN11	103	66	6879	4.04766	0.999999	0.948627	0.948627
Phospho 6	KEGG_PATHWAY	hsa04931:Insulin resistance	5	2.19298	0.0760237	IRS1, GFPT1, MLX, SLC2A1, PTPN11	103	108	6879	3.09196	0.999999	0.948627	0.948627
Phospho 6	KEGG_PATHWAY	hsa04520:Adherens junction	4	1.75439	0.0879183	PARD3, VCL, ACTB, TGFBR2	103	71	6879	3.76261	1	0.948627	0.948627
Phospho 6	KEGG_PATHWAY	hsa05220:Chronic myeloid leukemia	4	1.75439	0.0907963	MAP2K1, BRAF, PTPN11, TGFBR2	103	72	6879	3.71036	1	0.948627	0.948627
Phospho 6	KEGG_PATHWAY	hsa04919:Thyroid hormone signaling pathway	5	2.19298	0.0908525	NOTCH2, MAP2K1, NCOR1, SLC2A1, ACTB	103	115	6879	2.90376	1	0.948627	0.948627
Phospho 6	KEGG_PATHWAY	hsa04670:Leukocyte transendothelial migration	5	2.19298	0.0908525	GNAI3, PTPN11, CLDN2, VCL, ACTB	103	115	6879	2.90376	1	0.948627	0.948627
