# Supplementary material for: Machine learning-assisted elucidation of CD81–CD44 interactions in promoting cancer stemness and extracellular vesicle integrity
Source: eLife. 2022 Oct 4;11:e82669. doi: 10.7554/eLife.82669 (PMC9581534; doi:10.7554/eLife.82669)
Supplement: Supplementary file 6. [file elife-82669-supp6.xlsx]

## Sheet: Global_Clusters
sample-12_siCD81	sample-06_siCD81	sample-04_siCD81	sample-14_siCon	sample-07_siCon	sample-03_siCon	sample-09_siCD44	sample-13_siCD44	sample-01_siCD44	C: ANOVA Significant	C: Cluster	N: Length	N: -Log ANOVA p value	N: ANOVA q-value	T: Protein	T: Protein ID	T: Entry Name	T: Gene	T: Protein Description
-0.0674593	-0.433131	-1.60003	1.45939	0.514127	1.07707	0.635945	-0.667385	-0.918531	+	Cluster -1	131	1.22418	0.0320069	sp|Q9Y237|PIN4_HUMAN	Q9Y237	PIN4_HUMAN	PIN4	Peptidyl-prolyl cis-trans isomerase NIMA-interacting 4
-0.362073	-0.139293	-1.72012	1.04078	0.52869	1.3961	0.669206	-0.449429	-0.963858	+	Cluster -1	125	1.17807	0.0346024	sp|Q9BRA0|LSMD1_HUMAN	Q9BRA0	LSMD1_HUMAN	NAA38	N-alpha-acetyltransferase 38, NatC auxiliary subunit
-0.600381	0.11706	-1.68869	1.36347	0.762223	1.21951	0.0848997	-0.473587	-0.784496	+	Cluster -1	885	1.65937	0.0160614	sp|Q01780|EXOSX_HUMAN	Q01780	EXOSX_HUMAN	EXOSC10	Exosome component 10
-0.310776	-0.782771	-1.73093	1.06259	0.980047	1.2057	0.354954	0.0118542	-0.790663	+	Cluster -1	823	1.97001	0.0101254	sp|Q9Y5T5|UBP16_HUMAN	Q9Y5T5	UBP16_HUMAN	USP16	Ubiquitin carboxyl-terminal hydrolase 16
-0.0024475	-0.770533	-1.49237	1.34732	0.730022	1.29316	0.124666	-0.175104	-1.05472	+	Cluster -1	247	1.7454	0.0140578	sp|Q9H3R5|CENPH_HUMAN	Q9H3R5	CENPH_HUMAN	CENPH	Centromere protein H
-1.50405	0.0465735	-1.28237	1.10493	0.801792	0.600744	1.12829	-0.137946	-0.757964	+	Cluster -1	480	1.12099	0.0384013	sp|P31749|AKT1_HUMAN	P31749	AKT1_HUMAN	AKT1	RAC-alpha serine/threonine-protein kinase
-1.17413	-0.25998	-1.78332	0.900623	0.869961	1.14815	0.651575	-0.159646	-0.193228	+	Cluster -1	725	2.03338	0.00939814	sp|Q5VZE5|NAA35_HUMAN	Q5VZE5	NAA35_HUMAN	NAA35	N-alpha-acetyltransferase 35, NatC auxiliary subunit
-1.09419	-0.481835	-1.31552	1.02235	1.18522	0.956258	0.873089	-0.403261	-0.742109	+	Cluster -1	1462	1.90657	0.0108838	sp|P09884|DPOLA_HUMAN	P09884	DPOLA_HUMAN	POLA1	DNA polymerase alpha catalytic subunit
-0.395406	-0.536218	-1.67173	1.58265	0.681867	1.01885	-0.634612	-0.440959	0.395562	+	Cluster -1	556	1.81062	0.0126087	sp|P17987|TCPA_HUMAN	P17987	TCPA_HUMAN	TCP1	T-complex protein 1 subunit alpha
-0.54035	-0.589449	-2.13614	1.21692	0.52837	0.852074	0.0224517	0.0970712	0.549053	+	Cluster -1	233	1.77605	0.013176	sp|Q9NYP9|MS18A_HUMAN	Q9NYP9	MS18A_HUMAN	MIS18A	Protein Mis18-alpha
-0.493365	-0.995281	-1.95063	1.23499	0.829284	0.680726	0.408066	-0.0534416	0.339651	+	Cluster -1	447	2.28514	0.00669446	sp|P31150|GDIA_HUMAN	P31150	GDIA_HUMAN	GDI1	Rab GDP dissociation inhibitor alpha
-0.145458	-0.318366	-2.17975	0.734552	0.972856	1.10814	-0.557837	0.0776726	0.308192	+	Cluster -1	462	1.27002	0.0294742	sp|Q9HD26|GOPC_HUMAN	Q9HD26	GOPC_HUMAN	GOPC	Golgi-associated PDZ and coiled-coil motif-containing protein
-0.13023	-0.762636	-2.10132	0.782518	0.555555	1.40636	-0.126169	0.172658	0.203261	+	Cluster -1	616	1.52582	0.0192159	sp|Q9UBP0|SPAST_HUMAN	Q9UBP0	SPAST_HUMAN	SPAST	Spastin
-0.576718	-0.72577	-1.47834	1.29226	1.00854	0.579522	0.640297	-1.16002	0.420232	+	Cluster -1	99	1.43776	0.0222592	sp|P07311|ACYP1_HUMAN	P07311	ACYP1_HUMAN	ACYP1	Acylphosphatase-1
-0.733669	-0.688673	-1.67761	1.58653	0.976074	0.348195	0.315143	-0.550237	0.42424	+	Cluster -1	414	1.83211	0.0120744	sp|Q9NRB3|CHSTC_HUMAN	Q9NRB3	CHSTC_HUMAN	CHST12	Carbohydrate sulfotransferase 12
-0.787951	-1.0595	-1.15418	0.820933	0.369539	0.628665	1.24481	-1.07212	1.00982	+	Cluster -1	355	1.10433	0.0397178	sp|Q6ZSR9|YJ005_HUMAN	Q6ZSR9	YJ005_HUMAN		Uncharacterized protein FLJ45252
-0.899491	-0.699318	-1.16762	1.76652	0.90264	0.873453	0.164411	-0.177986	-0.762608	+	Cluster -1	1173	2.62749	0.00443077	sp|Q6PD62|CTR9_HUMAN	Q6PD62	CTR9_HUMAN	CTR9	RNA polymerase-associated protein CTR9 homolog
-1.01124	-0.577657	-1.22087	1.53103	1.28475	0.765312	0.163264	-0.233352	-0.701239	+	Cluster -1	350	2.85329	0.00372254	sp|Q9H5K3|SG196_HUMAN	Q9H5K3	SG196_HUMAN	POMK	Protein O-mannose kinase
-0.552535	-1.30834	-0.691275	1.6548	1.30799	0.471588	-0.201862	0.189564	-0.869933	+	Cluster -1	798	2.06654	0.00906229	sp|Q8TF76|HASP_HUMAN	Q8TF76	HASP_HUMAN	HASPIN	Serine/threonine-protein kinase haspin
-0.601676	-1.28668	-0.917053	1.35738	1.5097	0.772283	-0.275227	0.0301087	-0.588833	+	Cluster -1	857	3.11972	0.00295238	sp|Q9UL18|AGO1_HUMAN	Q9UL18	AGO1_HUMAN	AGO1	Protein argonaute-1
-0.581438	-0.80718	-0.649079	1.59886	1.60513	0.332289	-0.230338	-0.139862	-1.12838	+	Cluster -1	152	2.01875	0.00956699	sp|Q92982|NINJ1_HUMAN	Q92982	NINJ1_HUMAN	NINJ1	Ninjurin-1
-1.20017	-0.619438	-0.382961	1.64241	1.26671	0.778859	-0.391073	-0.117719	-0.976616	+	Cluster -1	534	2.56895	0.00444758	sp|Q6ZUT6|CCD9B_HUMAN	Q6ZUT6	CCD9B_HUMAN	CCDC9B	Coiled-coil domain-containing protein 9B
-1.01976	-1.20421	-0.125684	1.39846	1.38141	0.826067	-0.0675893	-0.250308	-0.938391	+	Cluster -1	1489	2.36808	0.0059034	sp|Q08AD1|CAMP2_HUMAN	Q08AD1	CAMP2_HUMAN	CAMSAP2	Calmodulin-regulated spectrin-associated protein 2
-0.809719	-1.30493	-0.41185	1.77475	0.686036	0.895185	-0.471127	0.43889	-0.797236	+	Cluster -1	373	1.88074	0.0112676	sp|Q8IUX4|ABC3F_HUMAN	Q8IUX4	ABC3F_HUMAN	APOBEC3F	DNA dC->dU-editing enzyme APOBEC-3F
-0.884275	-0.758151	-0.436768	1.44181	1.20353	1.13697	-1.18698	-0.0454868	-0.470648	+	Cluster -1	693	2.96229	0.00325628	sp|Q9Y653|AGRG1_HUMAN	Q9Y653	AGRG1_HUMAN	ADGRG1	Adhesion G-protein coupled receptor G1
-0.860806	-1.04423	-0.407766	1.65386	1.30695	0.612287	-0.926804	0.200307	-0.533798	+	Cluster -1	1675	2.24159	0.00709103	sp|Q00610|CLH1_HUMAN	Q00610	CLH1_HUMAN	CLTC	Clathrin heavy chain 1
-0.919238	-1.29933	-0.954712	1.27951	1.27032	0.67069	-0.320207	0.734308	-0.461348	+	Cluster -1	314	2.48764	0.0049635	sp|Q12982|BNIP2_HUMAN	Q12982	BNIP2_HUMAN	BNIP2	BCL2/adenovirus E1B 19 kDa protein-interacting protein 2
-1.32674	-1.47247	-0.346801	1.41568	0.810317	0.649757	-0.0838462	0.808975	-0.454874	+	Cluster -1	174	1.85945	0.0115934	sp|Q9Y5S9|RBM8A_HUMAN	Q9Y5S9	RBM8A_HUMAN	RBM8A	RNA-binding protein 8A
-1.45339	-1.27731	-0.458115	1.45461	0.867818	0.623114	-0.489331	0.741264	-0.00865901	+	Cluster -1	478	2.01893	0.00957212	sp|O43670|ZN207_HUMAN	O43670	ZN207_HUMAN	ZNF207	BUB3-interacting and GLEBS motif-containing protein ZNF207
-1.16146	-1.47629	-0.533245	1.18765	1.11211	0.851137	-0.530824	0.712483	-0.161568	+	Cluster -1	375	2.32916	0.00623601	sp|Q01085|TIAR_HUMAN	Q01085	TIAR_HUMAN	TIAL1	Nucleolysin TIAR
-1.1626	-0.7811	-0.47452	1.46045	1.2107	0.471102	-0.66533	0.850446	-0.909137	+	Cluster -1	163	1.472	0.020975	sp|Q9UHA3|RLP24_HUMAN	Q9UHA3	RLP24_HUMAN	RSL24D1	Probable ribosome biogenesis protein RLP24
-1.42452	-0.738451	-0.533058	1.54015	1.45198	0.221011	-0.295483	0.389327	-0.610953	+	Cluster -1	172	1.77617	0.0131802	sp|O95989|NUDT3_HUMAN	O95989	NUDT3_HUMAN	NUDT3	Diphosphoinositol polyphosphate phosphohydrolase 1
-1.36623	-0.925288	-0.697657	1.5236	1.33381	0.0297814	-0.131803	0.684582	-0.450791	+	Cluster -1	356	1.65881	0.0160497	sp|Q12907|LMAN2_HUMAN	Q12907	LMAN2_HUMAN	LMAN2	Vesicular integral-membrane protein VIP36
-1.13173	-1.22952	-0.729861	1.45655	1.31407	0.217016	-0.336514	0.75353	-0.313542	+	Cluster -1	510	1.91757	0.010794	sp|P07954|FUMH_HUMAN	P07954	FUMH_HUMAN	FH	Fumarate hydratase, mitochondrial
-1.30765	-0.27747	-1.02555	1.11307	1.41475	1.1806	-0.563982	-0.084535	-0.44924	+	Cluster -1	719	3.09752	0.00300386	sp|Q9H8H0|NOL11_HUMAN	Q9H8H0	NOL11_HUMAN	NOL11	Nucleolar protein 11
-1.39674	-0.455712	-1.0717	1.03853	0.457142	1.65271	-0.658363	0.487469	-0.0533371	+	Cluster -1	99	1.9227	0.0107456	sp|Q9C005|DPY30_HUMAN	Q9C005	DPY30_HUMAN	DPY30	Protein dpy-30 homolog
-1.20407	-0.459916	-1.00748	1.1409	1.01723	1.31022	-0.969464	0.483688	-0.311097	+	Cluster -1	963	2.27125	0.00684255	sp|Q14114|LRP8_HUMAN	Q14114	LRP8_HUMAN	LRP8	Low-density lipoprotein receptor-related protein 8
-0.741179	-0.672983	-1.40576	1.21469	1.03739	1.24822	-0.921711	0.249502	-0.00816921	+	Cluster -1	384	2.57213	0.00447251	sp|Q6ZMG9|CERS6_HUMAN	Q6ZMG9	CERS6_HUMAN	CERS6	Ceramide synthase 6
-0.51083	-1.00956	-1.10472	0.947702	0.866013	1.66609	-0.978111	0.297464	-0.174046	+	Cluster -1	2752	2.24957	0.00699584	sp|Q9UQ35|SRRM2_HUMAN	Q9UQ35	SRRM2_HUMAN	SRRM2	Serine/arginine repetitive matrix protein 2
-0.492124	-0.914936	-1.38662	0.890801	1.55586	1.14601	-0.542576	0.139338	-0.395748	+	Cluster -1	416	2.87106	0.00347259	sp|Q9H000|MKRN2_HUMAN	Q9H000	MKRN2_HUMAN	MKRN2	Probable E3 ubiquitin-protein ligase makorin-2
-0.65744	-1.18047	-1.12459	1.04451	0.981742	-0.151566	-0.183174	1.63312	-0.362143	+	Cluster -1	429	1.07386	0.0426302	sp|Q8NBX0|SCPDL_HUMAN	Q8NBX0	SCPDL_HUMAN	SCCPDH	Saccharopine dehydrogenase-like oxidoreductase
-0.0722574	-0.714677	-1.61055	0.876661	1.69312	0.149467	-0.438266	0.77719	-0.660683	+	Cluster -1	229	1.0459	0.0451345	sp|O43482|MS18B_HUMAN	O43482	MS18B_HUMAN	OIP5	Protein Mis18-beta
-0.45919	-1.21016	-1.73165	0.870435	0.78731	0.989417	0.298731	0.850768	-0.395667	+	Cluster -1	478	2.08139	0.00887248	sp|Q16670|ZSC26_HUMAN	Q16670	ZSC26_HUMAN	ZSCAN26	Zinc finger and SCAN domain-containing protein 26
-0.710947	-1.02605	-1.7763	0.918202	1.25275	0.537532	0.477714	0.553058	-0.225959	+	Cluster -1	957	2.4455	0.0051399	sp|O75400|PR40A_HUMAN	O75400	PR40A_HUMAN	PRPF40A	Pre-mRNA-processing factor 40 homolog A
-1.05837	-1.14946	-1.16451	1.02202	1.14028	0.448337	0.647947	0.841236	-0.727478	+	Cluster -1	360	1.98471	0.00997119	sp|O95149|SPN1_HUMAN	O95149	SPN1_HUMAN	SNUPN	Snurportin-1
-0.909975	-1.34441	-1.22504	0.666909	1.14598	0.660705	0.478271	1.07042	-0.54286	+	Cluster -1	153	2.10691	0.00865199	sp|Q9BPX5|ARP5L_HUMAN	Q9BPX5	ARP5L_HUMAN	ARPC5L	Actin-related protein 2/3 complex subunit 5-like protein
-0.94179	-1.41903	-1.14401	0.869584	1.08553	0.577945	0.455834	1.02646	-0.510528	+	Cluster -1	753	2.22354	0.00719571	sp|O75175|CNOT3_HUMAN	O75175	CNOT3_HUMAN	CNOT3	CCR4-NOT transcription complex subunit 3
-0.77013	-0.780549	-1.36542	1.31467	0.980085	0.362289	0.480723	0.852863	-1.07453	+	Cluster -1	876	1.37256	0.0247385	sp|Q9BXP5|SRRT_HUMAN	Q9BXP5	SRRT_HUMAN	SRRT	Serrate RNA effector molecule homolog
-0.33605	-1.08706	-1.17922	1.16578	1.37843	0.199564	0.449977	0.609417	-1.20084	+	Cluster -1	1269	1.18306	0.0344148	sp|Q13045|FLII_HUMAN	Q13045	FLII_HUMAN	FLII	Protein flightless-1 homolog
-0.615995	-0.563589	-1.48794	1.28646	1.38229	0.620088	0.000815434	0.376403	-0.998532	+	Cluster -1	137	1.87717	0.0113584	sp|Q9BYN0|SRXN1_HUMAN	Q9BYN0	SRXN1_HUMAN	SRXN1	Sulfiredoxin-1
-0.62288	-0.373775	-1.85658	1.01347	0.975151	0.911391	0.45675	0.412069	-0.915597	+	Cluster -1	412	1.52473	0.0192251	sp|O60884|DNJA2_HUMAN	O60884	DNJA2_HUMAN	DNAJA2	DnaJ homolog subfamily A member 2
-1.14872	-0.202291	-1.51768	0.90665	1.55944	-0.366333	0.063417	0.942333	-0.236812	+	Cluster -1	558	1.04394	0.0453976	sp|P06744|G6PI_HUMAN	P06744	G6PI_HUMAN	GPI	Glucose-6-phosphate isomerase
-0.91714	-0.294075	-1.67894	1.03436	1.56703	-0.324038	0.292463	0.653234	-0.332894	+	Cluster -1	119	1.12958	0.0378103	sp|P60866|RS20_HUMAN	P60866	RS20_HUMAN	RPS20	40S ribosomal protein S20
-0.850239	-0.240265	-1.74476	1.51259	0.73981	-0.075839	0.654608	0.674981	-0.670887	+	Cluster -1	1519	1.04157	0.0455868	sp|Q8TER5|ARH40_HUMAN	Q8TER5	ARH40_HUMAN	ARHGEF40	Rho guanine nucleotide exchange factor 40
-0.420384	-0.650734	-1.43569	1.74868	1.39663	-0.562922	-0.0669201	0.0619553	-0.0706161	+	Cluster -1	732	1.01155	0.0487109	sp|P13010|XRCC5_HUMAN	P13010	XRCC5_HUMAN	XRCC5	X-ray repair cross-complementing protein 5
-0.521815	-0.921039	-1.2111	1.88929	1.00068	-0.320492	-0.0882743	0.684883	-0.512135	+	Cluster -1	260	1.09617	0.040586	sp|P27707|DCK_HUMAN	P27707	DCK_HUMAN	DCK	Deoxycytidine kinase
-0.909206	-0.546693	-1.12711	1.53926	1.56102	-0.307164	-0.184596	0.565705	-0.591224	+	Cluster -1	255	1.20987	0.0328369	sp|P09661|RU2A_HUMAN	P09661	RU2A_HUMAN	SNRPA1	U2 small nuclear ribonucleoprotein A'
-1.16014	-0.774392	-0.832833	1.93196	1.22474	-0.227703	-0.223346	0.141951	-0.0802399	+	Cluster -1	303	1.47499	0.0208547	sp|P05026|AT1B1_HUMAN	P05026	AT1B1_HUMAN	ATP1B1	Sodium/potassium-transporting ATPase subunit beta-1
-1.36327	-0.711411	-0.949562	1.9071	0.982792	-0.20744	0.185317	0.221724	-0.0652514	+	Cluster -1	703	1.50825	0.0197849	sp|O15234|CASC3_HUMAN	O15234	CASC3_HUMAN	CASC3	Protein CASC3
-1.81344	-0.227309	-0.40851	0.762068	1.61219	0.41534	0.264695	0.36359	-0.968624	+	Cluster -1	333	1.12722	0.0379923	sp|P07711|CATL1_HUMAN	P07711	CATL1_HUMAN	CTSL	Procathepsin L
-1.11277	-1.26117	0.241784	0.843292	1.96125	0.0293526	-0.26851	0.224014	-0.657233	+	Cluster -1	1147	1.02471	0.0471429	sp|O95104|SCAF4_HUMAN	O95104	SCAF4_HUMAN	SCAF4	SR-related and CTD-associated factor 4
-1.38863	-1.19388	0.220515	0.813141	1.712	0.751748	0.0204248	-0.43139	-0.50393	+	Cluster -1	319	1.63434	0.0167335	sp|Q8TB03|CX038_HUMAN	Q8TB03	CX038_HUMAN	CXorf38	Uncharacterized protein CXorf38
-0.884057	-1.04583	0.167091	0.710011	2.0923	0.343328	0.0336242	-0.923545	-0.492923	+	Cluster -1	1159	1.26563	0.0296503	sp|Q96PQ0|SORC2_HUMAN	Q96PQ0	SORC2_HUMAN	SORCS2	VPS10 domain-containing receptor SorCS2
-0.905862	-1.60359	0.0490299	0.588651	1.86505	0.642701	-0.233115	-0.542045	0.139183	+	Cluster -1	285	1.43885	0.0222638	sp|P06753|TPM3_HUMAN	P06753	TPM3_HUMAN	TPM3	Tropomyosin alpha-3 chain
-0.935785	-1.21104	-0.053423	1.2024	1.4193	0.612061	0.603167	-1.06004	-0.576644	+	Cluster -1	428	1.49246	0.0203325	sp|Q16557|PSG3_HUMAN	Q16557	PSG3_HUMAN	PSG3	Pregnancy-specific beta-1-glycoprotein 3
-0.721575	-1.23263	-0.533575	0.609938	1.78697	0.463169	0.977898	-0.557495	-0.792691	+	Cluster -1	148	1.20852	0.032916	sp|O60869|EDF1_HUMAN	O60869	EDF1_HUMAN	EDF1	Endothelial differentiation-related factor 1
-0.221777	-1.41915	-0.69759	1.77751	1.33625	0.281746	-0.467413	-0.424097	-0.165481	+	Cluster -1	200	1.83147	0.0120952	sp|Q9NX70|MED29_HUMAN	Q9NX70	MED29_HUMAN	MED29	Mediator of RNA polymerase II transcription subunit 29
-0.1312	-1.89727	-0.335693	1.52989	1.28489	0.174327	-0.211103	-0.450207	0.0363746	+	Cluster -1	676	1.26559	0.0296427	sp|Q9UGP4|LIMD1_HUMAN	Q9UGP4	LIMD1_HUMAN	LIMD1	LIM domain-containing protein 1
-0.195788	-1.77907	-0.479735	1.6959	1.03827	0.56881	-0.119964	-0.29669	-0.431724	+	Cluster -1	708	1.73323	0.0142985	sp|P20810|ICAL_HUMAN	P20810	ICAL_HUMAN	CAST	Calpastatin
0.0386441	-1.548	-0.417963	1.13346	1.93995	-0.117932	-0.283347	-0.309832	-0.434981	+	Cluster -1	567	1.07787	0.0422984	sp|Q9BWE0|REPI1_HUMAN	Q9BWE0	REPI1_HUMAN	REPIN1	Replication initiator 1
0.179365	-1.31533	-0.743497	1.0695	1.90293	0.190615	0.0124519	-0.500299	-0.795735	+	Cluster -1	342	1.30494	0.0278869	sp|Q96G28|CFA36_HUMAN	Q96G28	CFA36_HUMAN	CFAP36	Cilia- and flagella-associated protein 36
-0.0729838	-1.60088	-0.831976	1.39432	1.63912	-0.0769766	-0.296262	-0.117414	-0.0369487	+	Cluster -1	168	1.31059	0.0275847	sp|P59998|ARPC4_HUMAN	P59998	ARPC4_HUMAN	ARPC4	Actin-related protein 2/3 complex subunit 4
-0.0230605	-1.06622	-1.26245	1.38137	1.73551	-0.394356	-0.332072	0.183323	-0.222044	+	Cluster -1	732	1.02599	0.0470233	sp|P07900|HS90A_HUMAN	P07900	HS90A_HUMAN	HSP90AA1	Heat shock protein HSP 90-alpha
-0.197579	-0.500226	-0.275557	1.4194	1.87609	0.106011	-0.836893	-1.04336	-0.547888	+	Cluster -1	703	1.89921	0.0109857	sp|Q8N9T8|KRI1_HUMAN	Q8N9T8	KRI1_HUMAN	KRI1	Protein KRI1 homolog
-0.533348	-0.881254	-0.197918	1.78019	1.50941	0.244143	-0.835381	-0.772432	-0.313413	+	Cluster -1	192	1.9873	0.00994421	sp|P63000|RAC1_HUMAN	P63000	RAC1_HUMAN	RAC1	Ras-related C3 botulinum toxin substrate 1
-0.885268	-1.14302	-0.574137	1.27304	1.67405	0.739313	-0.43673	-0.647884	0.000633167	+	Cluster -1	419	2.96638	0.00323232	sp|Q7L1Q6|BZW1_HUMAN	Q7L1Q6	BZW1_HUMAN	BZW1	Basic leucine zipper and W2 domain-containing protein 1
-0.721831	-0.802816	-0.347104	1.17855	2.00835	0.341405	-0.968367	-0.358558	-0.329628	+	Cluster -1	471	1.96696	0.0101582	sp|Q15233|NONO_HUMAN	Q15233	NONO_HUMAN	NONO	Non-POU domain-containing octamer-binding protein
-0.139719	-0.344761	-0.839056	1.67557	1.77872	-0.476933	-0.381977	-0.59094	-0.680907	+	Cluster -1	929	1.05877	0.0439254	sp|Q6XUX3|DUSTY_HUMAN	Q6XUX3	DUSTY_HUMAN	DSTYK	Dual serine/threonine and tyrosine protein kinase
-0.442668	-0.555728	-0.152421	1.49358	1.93415	-0.48972	-0.235394	-0.753598	-0.798198	+	Cluster -1	136	1.03438	0.0463735	sp|Q16695|H31T_HUMAN	Q16695	H31T_HUMAN	H3-4	Histone H3.1t
-0.676004	-1.12401	-0.33506	1.60407	1.7824	-0.410673	-0.373646	-0.236652	-0.23043	+	Cluster -1	215	1.15646	0.0358034	sp|P09429|HMGB1_HUMAN	P09429	HMGB1_HUMAN	HMGB1	High mobility group protein B1
-0.296008	-0.819237	-0.804673	1.429	1.97628	-0.352013	-0.477502	-0.12917	-0.52668	+	Cluster -1	136	1.17938	0.0345467	sp|P84243|H33_HUMAN	P84243	H33_HUMAN	H3-3A	Histone H3.3
-0.56269	-0.880863	-0.613521	1.52572	1.9197	-0.330838	-0.395232	-0.202706	-0.459576	+	Cluster -1	106	1.28524	0.0288661	sp|Q9GZP8|IMUP_HUMAN	Q9GZP8	IMUP_HUMAN	IMUP	Immortalization up-regulated protein
-0.417813	-0.654449	-0.296489	1.54001	1.9155	-0.319469	-0.654047	-0.31273	-0.800512	+	Cluster -1	195	1.25374	0.0302838	sp|O00264|PGRC1_HUMAN	O00264	PGRC1_HUMAN	PGRMC1	Membrane-associated progesterone receptor component 1
-0.569396	-1.35258	-1.20508	-0.155075	1.45278	1.32391	0.437599	0.429481	-0.361638	+	Cluster -1	522	1.58812	0.0176182	sp|Q5VIY5|ZN468_HUMAN	Q5VIY5	ZN468_HUMAN	ZNF468	Zinc finger protein 468
-0.988046	-1.17562	-1.07248	0.244229	1.8315	0.452753	0.444303	0.697526	-0.434165	+	Cluster -1	175	1.67543	0.0156969	sp|Q96T52|IMP2L_HUMAN	Q96T52	IMP2L_HUMAN	IMMP2L	Mitochondrial inner membrane protease subunit 2
-0.951657	-1.67179	-0.724431	-0.0837832	1.50009	0.67072	0.38469	0.95562	-0.0794663	+	Cluster -1	760	1.63426	0.0167275	sp|P51793|CLCN4_HUMAN	P51793	CLCN4_HUMAN	CLCN4	H(+)/Cl(-) exchange transporter 4
0.295921	-1.4383	-0.7283	0.662159	1.70326	0.574602	0.554637	-0.719008	-0.904979	+	Cluster -1	517	1.05086	0.0445986	sp|P35269|T2FA_HUMAN	P35269	T2FA_HUMAN	GTF2F1	General transcription factor IIF subunit 1
0.260644	-1.67506	0.0620524	0.70588	1.43933	0.859789	-0.0227554	-1.3071	-0.322774	+	Cluster -1	179	1.08829	0.0413536	sp|Q9NVQ4|FAIM1_HUMAN	Q9NVQ4	FAIM1_HUMAN	FAIM	Fas apoptotic inhibitory molecule 1
-0.0106637	-1.96477	-0.476065	0.328706	1.63797	0.959181	0.132576	-0.295146	-0.311783	+	Cluster -1	221	1.24863	0.0305065	sp|P51157|RAB28_HUMAN	P51157	RAB28_HUMAN	RAB28	Ras-related protein Rab-28
0.305487	-1.83194	-0.68502	0.546677	1.51439	0.91134	-0.0645098	-0.80207	0.105646	+	Cluster -1	562	1.18097	0.0345098	sp|Q9Y6K8|KAD5_HUMAN	Q9Y6K8	KAD5_HUMAN	AK5	Adenylate kinase isoenzyme 5
0.396339	-1.88173	-0.589869	1.05222	1.35945	0.588312	0.147455	-0.703663	-0.368521	+	Cluster -1	222	1.16187	0.0355997	sp|O43633|CHM2A_HUMAN	O43633	CHM2A_HUMAN	CHMP2A	Charged multivesicular body protein 2a
-0.28774	-2.11	-0.712896	0.846729	1.13686	0.102591	0.888999	0.329911	-0.19446	+	Cluster -1	1024	1.2892	0.0286667	sp|Q96RT8|GCP5_HUMAN	Q96RT8	GCP5_HUMAN	TUBGCP5	Gamma-tubulin complex component 5
-0.503929	-2.04357	-0.220475	0.708592	1.38454	0.484833	0.404752	0.475839	-0.690579	+	Cluster -1	254	1.1862	0.0342598	sp|Q9UKI2|BORG2_HUMAN	Q9UKI2	BORG2_HUMAN	CDC42EP3	Cdc42 effector protein 3
-0.141105	-2.22561	-0.205911	0.775492	1.39331	0.349024	0.369969	0.100575	-0.415744	+	Cluster -1	889	1.01183	0.0487038	sp|Q9BZF1|OSBL8_HUMAN	Q9BZF1	OSBL8_HUMAN	OSBPL8	Oxysterol-binding protein-related protein 8
0.231487	-1.86265	-0.630395	1.05087	1.0496	0.839121	0.433911	-0.129964	-0.981981	+	Cluster -1	420	1.16902	0.0351726	sp|P80303|NUCB2_HUMAN	P80303	NUCB2_HUMAN	NUCB2	Nucleobindin-2
-0.0561864	-2.00348	-0.924776	1.12846	0.769358	0.700706	0.659254	0.250236	-0.523577	+	Cluster -1	520	1.40049	0.0236958	sp|P55809|SCOT1_HUMAN	P55809	SCOT1_HUMAN	OXCT1	Succinyl-CoA:3-ketoacid coenzyme A transferase 1, mitochondrial
-0.0181147	-1.98738	-1.03333	0.673067	1.04985	0.814914	0.534607	0.471338	-0.50496	+	Cluster -1	2610	1.41937	0.0230711	sp|Q9ULT8|HECD1_HUMAN	Q9ULT8	HECD1_HUMAN	HECTD1	E3 ubiquitin-protein ligase HECTD1
-0.0160109	-2.11754	-0.674049	1.01915	1.26725	0.446737	-0.0857869	-0.233773	0.394016	+	Cluster -1	183	1.33082	0.0265575	sp|Q9NPA3|M1IP1_HUMAN	Q9NPA3	M1IP1_HUMAN	MID1IP1	Mid1-interacting protein 1
0.175996	-2.14561	-0.862915	1.05478	0.81721	0.421178	0.45904	-0.433685	0.514006	+	Cluster -1	1170	1.08612	0.0415402	sp|Q96EV2|RBM33_HUMAN	Q96EV2	RBM33_HUMAN	RBM33	RNA-binding protein 33
-0.105714	-1.94208	-0.943905	0.731904	1.19543	-0.105491	0.770747	-0.382099	0.781213	+	Cluster -1	184	1.09429	0.0407558	sp|Q04760|LGUL_HUMAN	Q04760	LGUL_HUMAN	GLO1	Lactoylglutathione lyase
-0.461239	-1.57988	-1.04564	1.44229	1.25867	-0.192109	0.583558	-0.282081	0.276428	+	Cluster -1	543	1.45708	0.0216899	sp|Q5D0E6|DALD3_HUMAN	Q5D0E6	DALD3_HUMAN	DALRD3	DALR anticodon-binding domain-containing protein 3
-0.828531	-1.54878	-1.08423	1.41716	1.09304	0.333088	0.647105	0.0407792	-0.0696315	+	Cluster -1	572	2.48949	0.00498625	sp|P48163|MAOX_HUMAN	P48163	MAOX_HUMAN	ME1	NADP-dependent malic enzyme
-0.62559	-1.5821	-1.28218	0.750037	1.3251	1.02534	0.0385113	0.0554437	0.295435	+	Cluster -1	907	3.20143	0.00310817	sp|P78344|IF4G2_HUMAN	P78344	IF4G2_HUMAN	EIF4G2	Eukaryotic translation initiation factor 4 gamma 2
-0.794055	-1.42694	-1.28381	0.557308	1.38688	0.900888	0.540136	-0.352899	0.472494	+	Cluster -1	272	2.63062	0.00440088	sp|O75663|TIPRL_HUMAN	O75663	TIPRL_HUMAN	TIPRL	TIP41-like protein
-0.598838	-1.91602	-1.07932	1.0022	1.09417	0.493846	0.45609	0.244677	0.303201	+	Cluster -1	322	2.5598	0.00446567	sp|Q96KB5|TOPK_HUMAN	Q96KB5	TOPK_HUMAN	PBK	Lymphokine-activated killer T-cell-originated protein kinase
-0.397306	-1.99336	-0.922685	0.862117	1.09054	0.569503	0.844045	-0.179181	0.126322	+	Cluster -1	316	1.79872	0.0128258	sp|P46736|BRCC3_HUMAN	P46736	BRCC3_HUMAN	BRCC3	Lys-63-specific deubiquitinase BRCC36
-0.770311	-1.82429	-0.986256	0.871236	0.960706	0.836939	0.452294	-0.224671	0.684359	+	Cluster -1	745	2.61594	0.00446906	sp|O15111|IKKA_HUMAN	O15111	IKKA_HUMAN	CHUK	Inhibitor of nuclear factor kappa-B kinase subunit alpha
-0.801603	-1.99127	-0.631292	0.527031	1.16716	0.797886	0.472838	-0.210862	0.670118	+	Cluster -1	177	1.99367	0.00982595	sp|O43447|PPIH_HUMAN	O43447	PPIH_HUMAN	PPIH	Peptidyl-prolyl cis-trans isomerase H
0.533112	-1.52422	-1.23282	1.4468	0.935901	0.393961	0.144114	0.143912	-0.840761	+	Cluster -1	1073	1.01187	0.0486941	sp|Q15714|T22D1_HUMAN	Q15714	T22D1_HUMAN	TSC22D1	TSC22 domain family protein 1
0.448453	-1.76228	-1.13864	1.60941	0.604802	0.560734	-0.177131	-0.278147	0.132799	+	Cluster -1	499	1.11725	0.0386766	sp|P15170|ERF3A_HUMAN	P15170	ERF3A_HUMAN	GSPT1	Eukaryotic peptide chain release factor GTP-binding subunit ERF3A
-0.258714	-1.59066	-1.397	1.21841	-0.259426	0.916943	0.0940893	0.295236	0.981125	+	Cluster -1	1000	1.42102	0.0229869	sp|Q86YS7|C2CD5_HUMAN	Q86YS7	C2CD5_HUMAN	C2CD5	C2 domain-containing protein 5
-0.079152	-1.62841	-1.15877	1.57194	-0.258097	1.13335	0.372042	0.1608	-0.113696	+	Cluster -1	383	1.19114	0.0339406	sp|Q2M296|MTHSD_HUMAN	Q2M296	MTHSD_HUMAN	MTHFSD	Methenyltetrahydrofolate synthase domain-containing protein
-0.37488	-1.94472	-1.13306	1.09992	0.876309	0.23282	0.449017	0.746904	0.0476947	+	Cluster -1	522	1.88388	0.011277	sp|P00390|GSHR_HUMAN	P00390	GSHR_HUMAN	GSR	Glutathione reductase, mitochondrial
-0.622342	-1.80537	-1.30161	0.916214	0.774702	0.724601	0.428635	0.686513	0.198654	+	Cluster -1	507	2.93057	0.00342675	sp|Q7Z4H8|PLGT3_HUMAN	Q7Z4H8	PLGT3_HUMAN	POGLUT3	Protein O-glucosyltransferase 3
-0.377445	-1.88033	-1.00835	1.4912	0.306954	0.490776	0.459569	0.706685	-0.189065	+	Cluster -1	239	1.57985	0.0178192	sp|O75954|TSN9_HUMAN	O75954	TSN9_HUMAN	TSPAN9	Tetraspanin-9
0.11215	-2.21919	-1.00161	1.04195	0.301688	0.683756	0.441213	0.408697	0.231346	+	Cluster -1	171	1.2697	0.0295251	sp|Q8WW01|SEN15_HUMAN	Q8WW01	SEN15_HUMAN	TSEN15	tRNA-splicing endonuclease subunit Sen15
0.236447	-2.06353	-1.12476	1.06888	0.0919271	0.791675	0.303927	0.740761	-0.0453268	+	Cluster -1	927	1.08008	0.0421036	sp|Q9Y5G3|PCDGD_HUMAN	Q9Y5G3	PCDGD_HUMAN	PCDHGB1	Protocadherin gamma-B1
-0.511923	-1.44577	-1.67619	1.1126	0.186315	0.285581	0.830307	0.769862	0.44923	+	Cluster -1	1723	2.30732	0.00642667	sp|Q9Y4K1|CRBG1_HUMAN	Q9Y4K1	CRBG1_HUMAN	CRYBG1	Beta/gamma crystallin domain-containing protein 1
-0.180767	-1.49939	-1.67871	0.972321	0.219369	0.472493	0.667276	1.11006	-0.0826503	+	Cluster -1	341	1.59116	0.0175689	sp|O95400|CD2B2_HUMAN	O95400	CD2B2_HUMAN	CD2BP2	CD2 antigen cytoplasmic tail-binding protein 2
-0.106373	-2.2707	-0.796623	0.183055	0.39046	1.10762	0.334823	0.540623	0.617118	+	Cluster -1	447	1.29632	0.0283726	sp|Q9Y6M4|KC1G3_HUMAN	Q9Y6M4	KC1G3_HUMAN	CSNK1G3	Casein kinase I isoform gamma-3
-0.0210534	-1.85155	-1.474	0.181553	0.517917	1.07675	0.27698	0.7582	0.535205	+	Cluster -1	1901	1.57242	0.0179283	sp|Q9UKA4|AKA11_HUMAN	Q9UKA4	AKA11_HUMAN	AKAP11	A-kinase anchor protein 11
-0.422445	-1.94248	-1.15442	0.0876885	0.998571	0.717348	0.24419	0.899849	0.5717	+	Cluster -1	204	1.93925	0.0106811	sp|Q9NXU5|ARL15_HUMAN	Q9NXU5	ARL15_HUMAN	ARL15	ADP-ribosylation factor-like protein 15
0.31848	-1.81931	-1.41679	0.543882	1.24079	0.54329	-0.102555	0.0292937	0.662923	+	Cluster -1	517	1.17759	0.0346216	sp|Q15223|NECT1_HUMAN	Q15223	NECT1_HUMAN	NECTIN1	Nectin-1
-0.209121	-1.78161	-1.40607	0.757669	0.688846	1.22838	0.0575415	0.223483	0.440879	+	Cluster -1	846	2.10083	0.00868754	sp|Q15398|DLGP5_HUMAN	Q15398	DLGP5_HUMAN	DLGAP5	Disks large-associated protein 5
0.298309	-1.77405	-1.44549	0.866246	0.779853	0.906908	-0.270349	0.648169	-0.00960232	+	Cluster -1	167	1.30526	0.0278847	sp|Q12974|TP4A2_HUMAN	Q12974	TP4A2_HUMAN	PTP4A2	Protein tyrosine phosphatase type IVA 2
0.274873	-1.25679	-2.02044	0.713064	0.885886	0.533015	-0.233784	0.65486	0.449317	+	Cluster -1	593	1.18261	0.0344391	sp|Q15723|ELF2_HUMAN	Q15723	ELF2_HUMAN	ELF2	ETS-related transcription factor Elf-2
-1.19105	-1.51008	0.23054	0.96837	1.26221	1.02657	-0.0800826	0.0979854	-0.804455	+	Cluster -1	400	1.66854	0.015829	sp|Q99418|CYH2_HUMAN	Q99418	CYH2_HUMAN	CYTH2	Cytohesin-2
-0.940517	-1.86764	0.0609838	0.767371	1.15149	1.00071	-0.203035	0.592264	-0.561624	+	Cluster -1	388	1.44785	0.0220262	sp|O76081|RGS20_HUMAN	O76081	RGS20_HUMAN	RGS20	Regulator of G-protein signaling 20
-0.976929	-1.54158	0.0262579	1.04965	0.63914	1.31519	-0.11695	0.620192	-1.01496	+	Cluster -1	226	1.35192	0.0254865	sp|P29033|CXB2_HUMAN	P29033	CXB2_HUMAN	GJB2	Gap junction beta-2 protein
-0.934398	-1.41487	-0.294109	1.1303	1.08251	0.948305	-0.302352	0.779786	-0.995179	+	Cluster -1	65	1.65236	0.0162017	sp|O75394|RM33_HUMAN	O75394	RM33_HUMAN	MRPL33	39S ribosomal protein L33, mitochondrial
-1.18675	-1.94651	0.146906	0.747751	0.47605	0.950101	0.682867	0.620669	-0.491083	+	Cluster -1	215	1.18089	0.0345102	sp|Q587I9|SFT2C_HUMAN	Q587I9	SFT2C_HUMAN	SFT2D3	Vesicle transport protein SFT2C
-0.831529	-2.02782	0.075892	0.925892	0.385682	1.24193	-0.357229	0.707306	-0.120118	+	Cluster -1	318	1.18313	0.0344125	sp|Q9H1A3|METL9_HUMAN	Q9H1A3	METL9_HUMAN	METTL9	Methyltransferase-like protein 9
0.137433	-1.82567	-0.103294	1.45743	0.701328	0.743645	-1.12473	0.325733	-0.311871	+	Cluster -1	593	1.00086	0.0499184	sp|Q8NFJ9|BBS1_HUMAN	Q8NFJ9	BBS1_HUMAN	BBS1	Bardet-Biedl syndrome 1 protein
-0.474087	-1.75539	0.0413289	1.47335	1.14678	0.766914	-0.64738	-0.122537	-0.428969	+	Cluster -1	824	1.74206	0.0141438	sp|Q8TD16|BICD2_HUMAN	Q8TD16	BICD2_HUMAN	BICD2	Protein bicaudal D homolog 2
-0.895647	-1.23455	0.14649	1.73652	1.02138	0.7515	-0.876563	-0.166838	-0.48229	+	Cluster -1	454	1.93831	0.0106497	sp|P49593|PPM1F_HUMAN	P49593	PPM1F_HUMAN	PPM1F	Protein phosphatase 1F
-0.846164	-1.65361	-0.0566982	1.57533	0.853616	0.970655	-0.601461	-0.0825911	-0.159079	+	Cluster -1	700	1.99355	0.00982083	sp|P17655|CAN2_HUMAN	P17655	CAN2_HUMAN	CAPN2	Calpain-2 catalytic subunit
-0.694309	-1.82291	-0.149926	1.4252	0.745804	0.964205	-0.726145	-0.0886112	0.346689	+	Cluster -1	718	1.63591	0.0167265	sp|P53794|SC5A3_HUMAN	P53794	SC5A3_HUMAN	SLC5A3	Sodium/myo-inositol cotransporter
-0.434414	-2.01411	-0.0676333	1.63778	0.428715	0.815569	-0.449893	0.122199	-0.0382152	+	Cluster -1	780	1.2452	0.0306587	sp|O43815|STRN_HUMAN	O43815	STRN_HUMAN	STRN	Striatin
-0.321147	-2.24818	-0.268582	1.44225	0.696762	0.308307	0.156926	-0.0532541	0.28692	+	Cluster -1	704	1.16638	0.0353083	sp|Q9H4Z3|CAPAM_HUMAN	Q9H4Z3	CAPAM_HUMAN	PCIF1	mRNA (2'-O-methyladenosine-N(6)-)-methyltransferase
-0.299291	-2.28456	-0.358112	0.938098	0.896057	0.932224	0.0674031	0.0710209	0.0371627	+	Cluster -1	1871	1.48775	0.020529	sp|Q3V6T2|GRDN_HUMAN	Q3V6T2	GRDN_HUMAN	CCDC88A	Girdin
-0.091451	-2.23482	-0.302185	1.09718	1.16802	0.55891	0.0242416	-0.0919317	-0.127968	+	Cluster -1	337	1.26677	0.0296151	sp|Q15599|NHRF2_HUMAN	Q15599	NHRF2_HUMAN	SLC9A3R2	Na(+)/H(+) exchange regulatory cofactor NHE-RF2
-0.591966	-2.36639	0.164458	0.918917	0.899117	0.538221	0.128271	0.0654691	0.243903	+	Cluster -1	323	1.0832	0.0417835	sp|P42330|AK1C3_HUMAN	P42330	AK1C3_HUMAN	AKR1C3	Aldo-keto reductase family 1 member C3
-0.63868	-2.24697	-0.015117	0.590567	1.25116	0.678757	0.391625	0.0800045	-0.0913548	+	Cluster -1	483	1.26521	0.0296756	sp|P34896|GLYC_HUMAN	P34896	GLYC_HUMAN	SHMT1	Serine hydroxymethyltransferase, cytosolic
-0.16531	-2.19086	0.0423315	0.690553	1.03478	1.05813	-0.56366	0.348372	-0.254337	+	Cluster -1	569	1.05517	0.0442374	sp|Q8TBZ3|WDR20_HUMAN	Q8TBZ3	WDR20_HUMAN	WDR20	WD repeat-containing protein 20
-0.512103	-1.98912	-0.278183	0.896494	1.18193	1.16632	-0.363638	-0.102795	0.00109174	+	Cluster -1	501	1.91246	0.0108126	sp|Q9UPY5|XCT_HUMAN	Q9UPY5	XCT_HUMAN	SLC7A11	Cystine/glutamate transporter
-0.0500884	-2.10858	-0.622035	0.551344	1.04777	1.28004	-0.148148	-0.19987	0.249568	+	Cluster -1	94	1.4365	0.0222981	sp|Q8N5W8|FA24B_HUMAN	Q8N5W8	FA24B_HUMAN	FAM24B	Protein FAM24B
0.214465	-1.89795	0.135223	0.747973	1.37385	0.833315	-0.327209	-0.0387009	-1.04097	+	Cluster -1	364	1.02946	0.0467048	sp|Q92633|LPAR1_HUMAN	Q92633	LPAR1_HUMAN	LPAR1	Lysophosphatidic acid receptor 1
-0.0966852	-2.00532	0.293837	1.27517	1.17467	0.595802	-0.339821	-0.405496	-0.492162	+	Cluster -1	843	1.15067	0.0361339	sp|P11216|PYGB_HUMAN	P11216	PYGB_HUMAN	PYGB	Glycogen phosphorylase, brain form
0.0825288	-2.01695	0.162941	0.984116	1.1778	0.945531	-0.632463	-0.325575	-0.377926	+	Cluster -1	1235	1.21836	0.0324623	sp|Q9H2G2|SLK_HUMAN	Q9H2G2	SLK_HUMAN	SLK	STE20-like serine/threonine-protein kinase
0.0233805	-2.04357	-0.167182	0.977351	1.32497	0.84331	-0.260446	-0.172738	-0.525077	+	Cluster -1	1261	1.36747	0.0249612	sp|Q52LW3|RHG29_HUMAN	Q52LW3	RHG29_HUMAN	ARHGAP29	Rho GTPase-activating protein 29
-0.521101	-1.75515	0.27234	0.960218	1.32207	1.1032	-0.278115	-0.534193	-0.569266	+	Cluster -1	570	1.67924	0.0156127	sp|Q14195|DPYL3_HUMAN	Q14195	DPYL3_HUMAN	DPYSL3	Dihydropyrimidinase-related protein 3
-0.2926	-1.79727	0.0667364	0.947371	1.17516	1.31041	-0.530129	-0.350046	-0.529636	+	Cluster -1	427	1.77734	0.0131822	sp|P08138|TNR16_HUMAN	P08138	TNR16_HUMAN	NGFR	Tumor necrosis factor receptor superfamily member 16
-0.524993	-1.83571	0.0694836	1.30712	1.11161	0.523734	0.516926	-0.28271	-0.885462	+	Cluster -1	476	1.18461	0.0342932	sp|O14757|CHK1_HUMAN	O14757	CHK1_HUMAN	CHEK1	Serine/threonine-protein kinase Chk1
-0.593871	-1.98739	0.0501439	1.26286	0.98513	0.813171	0.246267	-0.618981	-0.157322	+	Cluster -1	198	1.44088	0.0221893	sp|O14508|SOCS2_HUMAN	O14508	SOCS2_HUMAN	SOCS2	Suppressor of cytokine signaling 2
-0.495141	-1.5043	-0.186399	1.11986	1.40809	0.76409	-1.19017	0.371004	-0.287035	+	Cluster -1	257	1.57573	0.0178918	sp|Q9H6H4|REEP4_HUMAN	Q9H6H4	REEP4_HUMAN	REEP4	Receptor expression-enhancing protein 4
-1.01041	-1.50272	-0.379602	0.759821	1.3774	0.899908	-0.904708	0.684197	0.0761139	+	Cluster -1	298	1.72472	0.0144409	sp|P05141|ADT2_HUMAN	P05141	ADT2_HUMAN	SLC25A5	ADP/ATP translocase 2
-0.844373	-1.81258	-0.0666032	0.399131	1.26242	0.965261	-0.844788	0.749604	0.191922	+	Cluster -1	710	1.18399	0.0343254	sp|Q9UIG8|SO3A1_HUMAN	Q9UIG8	SO3A1_HUMAN	SLCO3A1	Solute carrier organic anion transporter family member 3A1
-0.615956	-1.22698	-0.583769	0.0574497	1.96371	0.92327	-0.717911	0.613426	-0.41324	+	Cluster -1	906	1.25304	0.0303149	sp|Q9P0K1|ADA22_HUMAN	Q9P0K1	ADA22_HUMAN	ADAM22	Disintegrin and metalloproteinase domain-containing protein 22
-0.290658	-1.52757	-0.401422	0.340622	1.11681	1.54181	-1.1575	0.555854	-0.177953	+	Cluster -1	420	1.21159	0.0328121	sp|Q8NBZ7|UXS1_HUMAN	Q8NBZ7	UXS1_HUMAN	UXS1	UDP-glucuronic acid decarboxylase 1
-0.31477	-1.23329	-0.100023	0.29468	1.26413	1.76454	-1.05452	0.0548573	-0.675604	+	Cluster -1	239	1.5272	0.0191418	sp|Q8WTV1|THAP3_HUMAN	Q8WTV1	THAP3_HUMAN	THAP3	THAP domain-containing protein 3
-0.152272	-1.42252	-0.164294	0.17819	1.35055	1.59879	-0.722511	0.287786	-0.953708	+	Cluster -1	283	1.2399	0.0309456	sp|Q8NI29|FBX27_HUMAN	Q8NI29	FBX27_HUMAN	FBXO27	F-box only protein 27
-0.162445	-1.68846	0.0570929	0.280278	1.50096	1.24697	-1.02263	0.181238	-0.393002	+	Cluster -1	404	1.12916	0.037848	sp|A6NKF1|SAC31_HUMAN	A6NKF1	SAC31_HUMAN	SAC3D1	SAC3 domain-containing protein 1
-0.666992	0.13034	-0.797295	1.54018	0.233002	1.49364	-0.809788	0.13078	-1.25387	+	Cluster -1	109	1.46227	0.0214917	sp|Q9GZT3|SLIRP_HUMAN	Q9GZT3	SLIRP_HUMAN	SLIRP	SRA stem-loop-interacting RNA-binding protein, mitochondrial
-0.48301	-0.204709	-0.711887	2.39245	0.318647	0.456102	-0.544362	-0.346888	-0.876341	+	Cluster -1	716	1.29458	0.0284583	sp|Q6ZPD9|D19L3_HUMAN	Q6ZPD9	D19L3_HUMAN	DPY19L3	Probable C-mannosyltransferase DPY19L3
-0.709067	-0.180388	-0.560322	2.17743	0.279677	0.796735	-0.828504	0.0290394	-1.00461	+	Cluster -1	430	1.42228	0.0229267	sp|Q8IV20|LACC1_HUMAN	Q8IV20	LACC1_HUMAN	LACC1	Purine nucleoside phosphorylase LACC1
-0.731656	-0.0475415	-0.988409	2.33397	0.295376	0.442402	-0.781994	-0.200806	-0.321339	+	Cluster -1	739	1.17507	0.034762	sp|P41250|GARS_HUMAN	P41250	GARS_HUMAN	GARS1	Glycine--tRNA ligase
0.249362	-1.15625	-0.547588	2.03202	0.31838	0.849072	-0.71327	-0.12301	-0.90872	+	Cluster -1	601	1.33671	0.0261935	sp|Q969P6|TOP1M_HUMAN	Q969P6	TOP1M_HUMAN	TOP1MT	DNA topoisomerase I, mitochondrial
-0.0769242	-0.738743	-0.127633	1.70391	0.181106	1.0325	-0.933115	0.483748	-1.52485	+	Cluster -1	407	1.05239	0.0444462	sp|O60858|TRI13_HUMAN	O60858	TRI13_HUMAN	TRIM13	E3 ubiquitin-protein ligase TRIM13
-0.726619	-0.509739	-0.274804	1.89303	0.728274	0.430187	-0.218339	0.317829	-1.63982	+	Cluster -1	106	1.13644	0.0372777	sp|Q7Z7K0|COXM1_HUMAN	Q7Z7K0	COXM1_HUMAN	CMC1	COX assembly mitochondrial protein homolog
-0.588002	-1.05509	-0.320736	2.18354	0.30031	0.58081	-0.0147657	0.0282823	-1.11435	+	Cluster -1	224	1.20207	0.0333085	sp|P55327|TPD52_HUMAN	P55327	TPD52_HUMAN	TPD52	Tumor protein D52
-0.632517	-1.27083	-0.663381	1.38477	0.446953	1.24427	-1.25136	0.233106	0.508986	+	Cluster -1	490	1.48271	0.0207241	sp|Q8NFT2|STEA2_HUMAN	Q8NFT2	STEA2_HUMAN	STEAP2	Metalloreductase STEAP2
-0.15893	-1.57176	-0.631175	1.44589	0.00516218	1.44655	-0.887671	0.366863	-0.0149297	+	Cluster -1	131	1.17517	0.0347608	sp|Q9NRG0|CHRC1_HUMAN	Q9NRG0	CHRC1_HUMAN	CHRAC1	Chromatin accessibility complex protein 1
0.489117	-0.290582	-1.90366	1.42284	0.95784	0.62771	-0.666941	-0.132176	-0.504154	+	Cluster -1	95	1.09662	0.0405775	sp|P61956|SUMO2_HUMAN	P61956	SUMO2_HUMAN	SUMO2	Small ubiquitin-related modifier 2
0.518446	-1.04918	-1.27604	1.2981	0.79443	1.04766	-1.25623	0.0218024	-0.0989931	+	Cluster -1	228	1.26397	0.0297179	sp|Q9NWU2|GID8_HUMAN	Q9NWU2	GID8_HUMAN	GID8	Glucose-induced degradation protein 8 homolog
-0.0350988	-1.02872	-0.789524	1.60438	1.40094	0.519589	-1.07754	-0.00291359	-0.591112	+	Cluster -1	388	1.95655	0.0103696	sp|Q9NR56|MBNL1_HUMAN	Q9NR56	MBNL1_HUMAN	MBNL1	Muscleblind-like protein 1
-0.372157	-0.734209	-0.707262	1.69033	0.832753	1.11384	-1.39096	-0.252461	-0.179876	+	Cluster -1	541	2.28364	0.00672597	sp|Q15758|AAAT_HUMAN	Q15758	AAAT_HUMAN	SLC1A5	Neutral amino acid transporter B(0)
-0.329726	-0.495145	-0.671283	1.85371	1.15683	0.373335	-1.4737	-0.316808	-0.0972099	+	Cluster -1	70	1.65322	0.0161626	sp|L0R8F8|MIDUO_HUMAN	L0R8F8	MIDUO_HUMAN	MIEF1	MIEF1 upstream open reading frame protein
-0.589039	-0.446201	0.367991	0.699146	0.267096	1.90216	0.251526	-1.4122	-1.04048	+	Cluster -1	349	1.0793	0.042135	sp|Q9H1E5|TMX4_HUMAN	Q9H1E5	TMX4_HUMAN	TMX4	Thioredoxin-related transmembrane protein 4
-0.676593	-1.55223	0.534566	0.675742	0.507929	1.86574	-0.373084	-0.36856	-0.613511	+	Cluster -1	697	1.1414	0.0368205	sp|Q9H3C7|GGNB2_HUMAN	Q9H3C7	GGNB2_HUMAN	GGNBP2	Gametogenetin-binding protein 2
-0.210154	-1.29588	0.251098	0.938837	0.8715	1.28622	0.348097	-0.647882	-1.54183	+	Cluster -1	239	1.21504	0.0325802	sp|Q8N9N7|LRC57_HUMAN	Q8N9N7	LRC57_HUMAN	LRRC57	Leucine-rich repeat-containing protein 57
-0.425743	-0.719774	-0.737662	0.074242	0.585959	2.39164	0.00305043	-0.560586	-0.611122	+	Cluster -1	85	1.1704	0.0350834	sp|Q8NHZ8|CDC26_HUMAN	Q8NHZ8	CDC26_HUMAN	CDC26	Anaphase-promoting complex subunit CDC26
-0.466993	-1.44445	-0.955795	0.0211457	0.583596	1.90513	0.0964046	0.750181	-0.489219	+	Cluster -1	121	1.22795	0.0317632	sp|P62699|YPEL5_HUMAN	P62699	YPEL5_HUMAN	YPEL5	Protein yippee-like 5
-0.0192581	-0.693008	0.709281	-0.258453	1.20788	1.59203	-0.458917	-0.499851	-1.57971	+	Cluster -1	785	1.00501	0.0495912	sp|Q8N3S3|PHTF2_HUMAN	Q8N3S3	PHTF2_HUMAN	PHTF2	Protein PHTF2
0.117107	-0.934354	0.0702729	0.0625767	1.42431	1.37097	-1.13748	0.358461	-1.33186	+	Cluster -1	396	1.03809	0.0459907	sp|Q15007|FL2D_HUMAN	Q15007	FL2D_HUMAN	WTAP	Pre-mRNA-splicing regulator WTAP
-0.0826	-0.73371	-0.00396668	0.688785	1.17004	1.00063	-0.772355	0.63371	-1.90053	+	Cluster -1	455	1.01735	0.0479719	sp|O60239|3BP5_HUMAN	O60239	3BP5_HUMAN	SH3BP5	SH3 domain-binding protein 5
-0.838365	-0.0443788	0.086655	-0.0965529	1.38936	1.5932	-0.480631	-1.60584	-0.00345214	+	Cluster -1	249	1.05621	0.0441179	sp|P19404|NDUV2_HUMAN	P19404	NDUV2_HUMAN	NDUFV2	NADH dehydrogenase [ubiquinone] flavoprotein 2, mitochondrial
-1.488	-0.706805	-0.33421	1.00428	0.699897	1.79639	-0.360983	-0.0479745	-0.5626	+	Cluster -1	1844	2.20845	0.00728354	sp|Q96QE3|ATAD5_HUMAN	Q96QE3	ATAD5_HUMAN	ATAD5	ATPase family AAA domain-containing protein 5
-1.33855	0.24658	-0.223205	0.616455	0.774117	1.93025	-0.853609	-0.587947	-0.564093	+	Cluster -1	261	1.56505	0.0181551	sp|Q9P0I2|EMC3_HUMAN	Q9P0I2	EMC3_HUMAN	EMC3	ER membrane protein complex subunit 3
-0.956249	-0.390342	-0.34542	0.775607	0.574994	2.11221	-1.0884	-0.378869	-0.303537	+	Cluster -1	254	1.80395	0.0127966	sp|Q53S08|RAB6D_HUMAN	Q53S08	RAB6D_HUMAN	RAB6D	Ras-related protein Rab-6D
-1.236	-0.953959	-0.018352	-0.0314404	1.66401	1.44662	-0.787947	-0.235149	0.152224	+	Cluster -1	343	1.29487	0.0284375	sp|Q9BXJ8|TACAN_HUMAN	Q9BXJ8	TACAN_HUMAN	TMEM120A	Ion channel TACAN
-1.66654	-0.441338	0.333093	0.301591	1.03093	1.69213	-0.834285	-0.450126	0.0345357	+	Cluster -1	336	1.12259	0.0382816	sp|O14657|TOR1B_HUMAN	O14657	TOR1B_HUMAN	TOR1B	Torsin-1B
0.0203229	-1.30931	-0.696687	0.0369038	1.72446	1.17946	-1.10824	-0.234699	0.387789	+	Cluster -1	414	1.07752	0.0423215	sp|Q6UWP7|LCLT1_HUMAN	Q6UWP7	LCLT1_HUMAN	LCLAT1	Lysocardiolipin acyltransferase 1
-0.495865	-0.004395	-0.349489	-0.137581	1.54345	1.75602	-1.2634	-0.547794	-0.500934	+	Cluster -1	194	1.44208	0.022184	sp|Q9UL26|RB22A_HUMAN	Q9UL26	RB22A_HUMAN	RAB22A	Ras-related protein Rab-22A
-0.0569383	-0.428312	-0.686534	-0.197383	1.70526	1.41522	-1.52178	-0.273084	0.043553	+	Cluster -1	327	1.01463	0.0483148	sp|Q7L5D6|GET4_HUMAN	Q7L5D6	GET4_HUMAN	GET4	Golgi to ER traffic protein 4 homolog
0.498727	-1.08597	-0.598705	1.59495	0.491383	1.14877	-0.052097	-1.23483	-0.762221	+	Cluster -1	393	1.44304	0.0221664	sp|Q9BVC3|DCC1_HUMAN	Q9BVC3	DCC1_HUMAN	DSCC1	Sister chromatid cohesion protein DCC1
0.707418	-1.52221	-0.520823	1.0127	0.75348	1.17274	-0.138494	-1.38455	-0.0802604	+	Cluster -1	1835	1.01547	0.0481988	sp|Q68CP9|ARID2_HUMAN	Q68CP9	ARID2_HUMAN	ARID2	AT-rich interactive domain-containing protein 2
0.712303	-1.05523	-0.530602	0.590599	1.59092	1.05384	-1.19257	-0.558593	-0.610671	+	Cluster -1	318	1.57024	0.0179719	sp|Q96QD9|UIF_HUMAN	Q96QD9	UIF_HUMAN	FYTTD1	UAP56-interacting factor
0.772646	-1.0925	-0.324587	0.472166	1.48844	1.1016	-0.976958	-0.240936	-1.19987	+	Cluster -1	454	1.3737	0.0247102	sp|Q96GN5|CDA7L_HUMAN	Q96GN5	CDA7L_HUMAN	CDCA7L	Cell division cycle-associated 7-like protein
0.664651	-1.67538	-0.328643	0.939827	1.0367	1.19164	-0.320856	-0.641275	-0.866673	+	Cluster -1	1015	1.3036	0.027982	sp|Q9BPX3|CND3_HUMAN	Q9BPX3	CND3_HUMAN	NCAPG	Condensin complex subunit 3
0.653877	-1.53042	-0.276784	1.11875	0.929747	1.21595	-0.700103	-0.513826	-0.897189	+	Cluster -1	727	1.50568	0.0198845	sp|P43304|GPDM_HUMAN	P43304	GPDM_HUMAN	GPD2	Glycerol-3-phosphate dehydrogenase, mitochondrial
1.06058	-1.49453	-0.858734	1.11203	0.989349	0.858918	-0.429954	-0.629292	-0.608358	+	Cluster -1	78	1.04221	0.0455002	sp|Q92686|NEUG_HUMAN	Q92686	NEUG_HUMAN	NRGN	Neurogranin
1.00369	-1.42039	-0.77157	0.448751	1.15611	1.31915	-0.791597	-0.593076	-0.351076	+	Cluster -1	1048	1.01346	0.0485047	sp|Q9Y2H5|PKHA6_HUMAN	Q9Y2H5	PKHA6_HUMAN	PLEKHA6	Pleckstrin homology domain-containing family A member 6
0.93932	-1.2535	-0.526088	1.41028	0.913849	0.603733	-0.492906	-1.32963	-0.265058	+	Cluster -1	725	1.09411	0.0407555	sp|Q8IYI6|EXOC8_HUMAN	Q8IYI6	EXOC8_HUMAN	EXOC8	Exocyst complex component 8
0.794484	-1.10801	-0.0359206	1.60983	0.984727	0.373578	-0.954502	-1.09967	-0.56451	+	Cluster -1	706	1.39751	0.0238477	sp|Q9UEY8|ADDG_HUMAN	Q9UEY8	ADDG_HUMAN	ADD3	Gamma-adducin
0.881593	-1.22333	-0.530704	1.22499	1.26404	0.603762	-1.13953	-0.763006	-0.317814	+	Cluster -1	741	1.31557	0.0272854	sp|Q15003|CND2_HUMAN	Q15003	CND2_HUMAN	NCAPH	Condensin complex subunit 2
0.923425	-1.26964	-0.328468	1.0015	0.865865	1.01333	-1.33961	-0.922054	0.0556494	+	Cluster -1	810	1.09206	0.041023	sp|O75152|ZC11A_HUMAN	O75152	ZC11A_HUMAN	ZC3H11A	Zinc finger CCCH domain-containing protein 11A
1.1625	-0.949554	-0.00354632	0.981404	1.16375	0.573336	-0.640013	-1.3362	-0.951678	+	Cluster -1	592	1.43244	0.0224801	sp|Q7Z569|BRAP_HUMAN	Q7Z569	BRAP_HUMAN	BRAP	BRCA1-associated protein
0.850173	-0.886775	0.171579	0.727323	1.54005	0.567386	-0.782714	-1.43597	-0.75105	+	Cluster -1	394	1.58198	0.017738	sp|Q13115|DUS4_HUMAN	Q13115	DUS4_HUMAN	DUSP4	Dual specificity protein phosphatase 4
0.927569	-1.01741	-0.637886	0.953574	1.32658	0.948269	-0.661362	-0.93181	-0.907525	+	Cluster -1	285	1.64421	0.0164996	sp|Q8N954|GPT11_HUMAN	Q8N954	GPT11_HUMAN	GPATCH11	G patch domain-containing protein 11
1.03365	-0.572578	-0.603629	0.610175	1.37066	1.0117	-0.766019	-1.36334	-0.720629	+	Cluster -1	449	1.62371	0.0168462	sp|O43829|ZBT14_HUMAN	O43829	ZBT14_HUMAN	ZBTB14	Zinc finger and BTB domain-containing protein 14
0.0324506	-0.924449	-0.687778	1.41312	1.59596	0.365434	-0.109656	-1.37263	-0.31246	+	Cluster -1	181	1.62487	0.0168076	sp|Q13442|HAP28_HUMAN	Q13442	HAP28_HUMAN	PDAP1	28 kDa heat- and acid-stable phosphoprotein
0.116517	-0.707064	-0.960473	1.72034	1.57809	0.0404236	-0.620524	-0.735366	-0.431948	+	Cluster -1	674	1.55962	0.0183192	sp|Q09019|DMWD_HUMAN	Q09019	DMWD_HUMAN	DMWD	Dystrophia myotonica WD repeat-containing protein
0.0829682	-0.539168	-0.687571	1.67242	1.53506	0.273279	-0.446642	-1.03291	-0.857433	+	Cluster -1	632	2.0142	0.00957143	sp|Q8NAN2|MIGA1_HUMAN	Q8NAN2	MIGA1_HUMAN	MIGA1	Mitoguardin 1
0.500041	-1.01486	-0.711476	1.77511	1.26343	0.186511	-0.438033	-0.885222	-0.675491	+	Cluster -1	165	1.41513	0.0231491	sp|P60981|DEST_HUMAN	P60981	DEST_HUMAN	DSTN	Destrin
0.886618	-0.894408	-1.03675	1.40871	0.960025	0.861183	-0.493061	-0.936359	-0.755959	+	Cluster -1	929	1.48104	0.020769	sp|Q6P3W7|SCYL2_HUMAN	Q6P3W7	SCYL2_HUMAN	SCYL2	SCY1-like protein 2
0.549092	-0.962761	-0.858825	1.39645	1.11928	0.997523	-0.748029	-1.03136	-0.461362	+	Cluster -1	431	2.03933	0.00935534	sp|P55010|IF5_HUMAN	P55010	IF5_HUMAN	EIF5	Eukaryotic translation initiation factor 5
0.726986	-1.03922	-1.20184	1.46611	1.19676	0.49629	-0.191181	-0.840022	-0.613892	+	Cluster -1	736	1.27489	0.0292973	sp|Q9NQX3|GEPH_HUMAN	Q9NQX3	GEPH_HUMAN	GPHN	Gephyrin
0.580737	-1.50866	-0.994224	1.50281	1.13201	0.50705	-0.333369	-0.663728	-0.222619	+	Cluster -1	382	1.2857	0.0288543	sp|P35813|PPM1A_HUMAN	P35813	PPM1A_HUMAN	PPM1A	Protein phosphatase 1A
-0.0750479	-1.17305	-1.1195	1.32462	1.30144	0.836486	0.0150872	-0.00701298	-1.10303	+	Cluster -1	525	1.99105	0.00987857	sp|Q9UPT9|UBP22_HUMAN	Q9UPT9	UBP22_HUMAN	USP22	Ubiquitin carboxyl-terminal hydrolase 22
0.273456	-1.15249	-0.859842	1.24341	1.2096	1.20704	-0.417066	-0.5442	-0.959905	+	Cluster -1	1178	2.37097	0.00592687	sp|Q9C0B9|ZCHC2_HUMAN	Q9C0B9	ZCHC2_HUMAN	ZCCHC2	Zinc finger CCHC domain-containing protein 2
0.139018	-0.472399	-1.21819	1.32224	1.30124	0.850823	-0.231451	-0.286947	-1.40434	+	Cluster -1	719	1.84477	0.0118386	sp|P33993|MCM7_HUMAN	P33993	MCM7_HUMAN	MCM7	DNA replication licensing factor MCM7
0.245624	-0.292676	-1.08007	1.32055	0.963507	1.15868	-0.236577	-0.562259	-1.51678	+	Cluster -1	821	1.91598	0.0107685	sp|Q14566|MCM6_HUMAN	Q14566	MCM6_HUMAN	MCM6	DNA replication licensing factor MCM6
0.274244	-0.774454	-1.4484	1.07581	0.997039	1.36092	-0.439937	-0.0307803	-1.01445	+	Cluster -1	863	1.76211	0.0134946	sp|P33991|MCM4_HUMAN	P33991	MCM4_HUMAN	MCM4	DNA replication licensing factor MCM4
0.241253	-0.533877	-1.59483	1.31599	1.28388	0.833421	-0.43592	-0.213982	-0.89594	+	Cluster -1	1616	1.75083	0.0139213	sp|P26358|DNMT1_HUMAN	P26358	DNMT1_HUMAN	DNMT1	DNA (cytosine-5)-methyltransferase 1
0.061043	-0.629664	-0.817951	1.03113	1.9218	0.516957	-0.759469	-0.185535	-1.13831	+	Cluster -1	1163	1.87367	0.0114255	sp|Q9UHB7|AFF4_HUMAN	Q9UHB7	AFF4_HUMAN	AFF4	AF4/FMR2 family member 4
0.594404	-0.55251	-0.835996	1.32763	1.65865	0.247085	-0.904884	-0.577737	-0.956641	+	Cluster -1	1009	1.61191	0.0171429	sp|P49916|DNLI3_HUMAN	P49916	DNLI3_HUMAN	LIG3	DNA ligase 3
-0.146208	-0.721585	-1.01911	1.31012	1.68363	0.780299	-0.7638	-0.711867	-0.411478	+	Cluster -1	643	2.87838	0.00347305	sp|Q9UKV5|AMFR_HUMAN	Q9UKV5	AMFR_HUMAN	AMFR	E3 ubiquitin-protein ligase AMFR
-0.0490055	-0.962867	-0.710628	1.23264	1.44085	1.19256	-0.797058	-0.618485	-0.728012	+	Cluster -1	1134	3.61953	0.00246512	sp|Q9NPG3|UBN1_HUMAN	Q9NPG3	UBN1_HUMAN	UBN1	Ubinuclein-1
-0.151538	-1.07811	-0.740455	1.21669	1.639	0.920749	-0.933109	-0.433019	-0.440215	+	Cluster -1	433	2.89859	0.00345566	sp|Q9NRG4|SMYD2_HUMAN	Q9NRG4	SMYD2_HUMAN	SMYD2	N-lysine methyltransferase SMYD2
-0.284685	-1.09895	-0.391014	1.32255	1.25117	1.3117	-0.599896	-0.860345	-0.650526	+	Cluster -1	247	3.8	0.00164593	sp|Q96MF6|CQ10A_HUMAN	Q96MF6	CQ10A_HUMAN	COQ10A	Coenzyme Q-binding protein COQ10 homolog A, mitochondrial
0.196447	-0.281341	-0.76831	1.0975	1.31912	1.25954	-0.682396	-1.11652	-1.02404	+	Cluster -1	1573	3.38292	0.00292135	sp|O43426|SYNJ1_HUMAN	O43426	SYNJ1_HUMAN	SYNJ1	Synaptojanin-1
-0.0294867	-0.228766	-0.822334	1.50202	1.11628	1.1585	-0.88203	-0.944007	-0.870168	+	Cluster -1	351	3.80015	0.00165385	sp|Q8N335|GPD1L_HUMAN	Q8N335	GPD1L_HUMAN	GPD1L	Glycerol-3-phosphate dehydrogenase 1-like protein
-0.070949	-0.224034	-0.647186	1.29443	1.38096	1.0986	-0.935237	-0.770545	-1.12605	+	Cluster -1	950	4.35234	0.00025	sp|Q9H0D6|XRN2_HUMAN	Q9H0D6	XRN2_HUMAN	XRN2	5'-3' exoribonuclease 2
-0.0768683	-0.115073	-1.02128	1.51375	1.33949	0.810989	-1.17071	-0.593723	-0.686574	+	Cluster -1	709	2.66904	0.00433216	sp|Q14444|CAPR1_HUMAN	Q14444	CAPR1_HUMAN	CAPRIN1	Caprin-1
0.189573	-0.562187	-0.896671	1.50116	1.36381	0.84866	-0.859836	-0.703854	-0.88066	+	Cluster -1	1447	2.88425	0.00348563	sp|O14924|RGS12_HUMAN	O14924	RGS12_HUMAN	RGS12	Regulator of G-protein signaling 12
0.472942	-1.08538	-0.683847	1.57283	1.34055	0.351578	-0.328707	-0.443593	-1.19638	+	Cluster -1	904	1.46703	0.021226	sp|P49736|MCM2_HUMAN	P49736	MCM2_HUMAN	MCM2	DNA replication licensing factor MCM2
0.701406	-0.67229	-0.770568	1.4442	1.06441	0.506423	-0.177772	-0.431729	-1.66408	+	Cluster -1	808	1.25059	0.0303869	sp|P25205|MCM3_HUMAN	P25205	MCM3_HUMAN	MCM3	DNA replication licensing factor MCM3
0.478619	-0.886062	-0.661906	1.63869	0.890977	0.876736	-0.271812	-0.816555	-1.24869	+	Cluster -1	187	1.85236	0.0116739	sp|P00374|DYR_HUMAN	P00374	DYR_HUMAN	DHFR	Dihydrofolate reductase
0.774133	-1.42222	-0.0748654	1.48957	0.936088	0.419531	-0.48428	-0.306475	-1.33149	+	Cluster -1	1657	1.03095	0.0466023	sp|P46940|IQGA1_HUMAN	P46940	IQGA1_HUMAN	IQGAP1	Ras GTPase-activating-like protein IQGAP1
0.49365	-1.33525	-0.537229	1.80989	0.746719	0.441856	0.0586576	-0.489493	-1.1888	+	Cluster -1	154	1.07895	0.0421777	sp|Q99471|PFD5_HUMAN	Q99471	PFD5_HUMAN	PFDN5	Prefoldin subunit 5
0.133492	-1.32674	-0.129296	1.83922	0.919316	0.341559	-0.0671894	-0.411603	-1.29876	+	Cluster -1	1496	1.21012	0.032857	sp|O15056|SYNJ2_HUMAN	O15056	SYNJ2_HUMAN	SYNJ2	Synaptojanin-2
0.0531657	-0.506152	-0.912099	1.46484	1.2429	0.273299	0.585762	-0.666738	-1.53498	+	Cluster -1	1429	1.05997	0.0438059	sp|Q9ULJ7|ANR50_HUMAN	Q9ULJ7	ANR50_HUMAN	ANKRD50	Ankyrin repeat domain-containing protein 50
1.20382	-0.37721	-0.626377	1.15086	0.773979	0.679683	-1.65816	-0.90785	-0.23874	+	Cluster -1	185	1.23382	0.0314029	sp|Q8N5I9|CL045_HUMAN	Q8N5I9	CL045_HUMAN	C12orf45	Uncharacterized protein C12orf45
0.923693	-0.443267	-0.702538	1.22131	1.20486	0.599624	-1.48127	-0.867814	-0.454603	+	Cluster -1	1001	1.61757	0.0169422	sp|Q13472|TOP3A_HUMAN	Q13472	TOP3A_HUMAN	TOP3A	DNA topoisomerase 3-alpha
0.347021	-0.489132	-0.95379	1.59752	0.755232	1.22668	-0.998242	-0.786902	-0.69838	+	Cluster -1	138	2.39485	0.00581373	sp|Q8N2Z9|CENPS_HUMAN	Q8N2Z9	CENPS_HUMAN	CENPS	Centromere protein S
0.863711	-0.180318	-0.948197	1.37999	0.598235	1.05595	-1.36364	-0.923739	-0.481995	+	Cluster -1	452	1.59528	0.0174833	sp|Q9HBU6|EKI1_HUMAN	Q9HBU6	EKI1_HUMAN	ETNK1	Ethanolamine kinase 1
0.746794	-0.0458978	-1.05849	1.24954	0.753186	1.1445	-0.495094	-1.10433	-1.19021	+	Cluster -1	342	1.76661	0.0133915	sp|Q99633|PRP18_HUMAN	Q99633	PRP18_HUMAN	PRPF18	Pre-mRNA-splicing factor 18
0.6	0.145766	-0.879619	1.4807	0.815204	0.912939	-1.0362	-0.984198	-1.0546	+	Cluster -1	1146	2.26167	0.00686755	sp|Q9H6R4|NOL6_HUMAN	Q9H6R4	NOL6_HUMAN	NOL6	Nucleolar protein 6
0.593803	-0.210672	-0.519551	1.45888	0.723315	1.03811	-0.537138	-1.08311	-1.46364	+	Cluster -1	2342	2.30208	0.00647941	sp|Q8NG31|KNL1_HUMAN	Q8NG31	KNL1_HUMAN	KNL1	Kinetochore scaffold 1
0.590166	0.265484	-0.50452	1.34395	0.47572	0.990385	-0.38925	-0.985997	-1.78594	+	Cluster -1	393	1.80897	0.0126029	sp|P51553|IDH3G_HUMAN	P51553	IDH3G_HUMAN	IDH3G	Isocitrate dehydrogenase [NAD] subunit gamma, mitochondrial
0.984044	-0.0092616	-1.58345	1.12177	1.07872	0.649991	-0.695409	-0.757154	-0.789241	+	Cluster -1	1483	1.07972	0.0420996	sp|Q9UIG0|BAZ1B_HUMAN	Q9UIG0	BAZ1B_HUMAN	BAZ1B	Tyrosine-protein kinase BAZ1B
1.0144	-0.399363	-0.945414	1.34444	1.03718	0.621909	-0.509181	-0.928627	-1.23534	+	Cluster -1	219	1.47711	0.0208247	sp|P10412|H14_HUMAN	P10412	H14_HUMAN	H1-4	Histone H1.4
1.00787	-0.0545365	-1.08316	1.19564	1.32692	0.241907	-0.589844	-0.776757	-1.26804	+	Cluster -1	702	1.22132	0.0322711	sp|Q04446|GLGB_HUMAN	Q04446	GLGB_HUMAN	GBE1	1,4-alpha-glucan-branching enzyme
0.863535	0.617506	-0.805183	0.987001	0.954931	0.64592	-0.621248	-1.17266	-1.4698	+	Cluster -1	553	1.76463	0.0134613	sp|Q9BZE9|ASPC1_HUMAN	Q9BZE9	ASPC1_HUMAN	ASPSCR1	Tether containing UBX domain for GLUT4
0.645335	0.495045	-1.13192	0.879215	1.20291	0.825209	-0.51666	-1.27499	-1.12415	+	Cluster -1	111	1.59691	0.0174191	sp|Q15004|PAF15_HUMAN	Q15004	PAF15_HUMAN	PCLAF	PCNA-associated factor
0.771398	0.183502	-0.521228	1.29159	1.2717	0.329738	-1.02636	-1.206	-1.09434	+	Cluster -1	241	2.21759	0.00717764	sp|Q9P031|TAP26_HUMAN	Q9P031	TAP26_HUMAN	CCDC59	Thyroid transcription factor 1-associated protein 26
0.782927	0.0462835	-0.904823	1.3792	1.025	0.632065	-0.910196	-1.40153	-0.648925	+	Cluster -1	320	1.80403	0.0127973	sp|Q9Y3S2|ZN330_HUMAN	Q9Y3S2	ZN330_HUMAN	ZNF330	Zinc finger protein 330
1.44284	-0.529615	-0.356584	0.42432	1.01543	1.02533	-1.20461	-1.17881	-0.6383	+	Cluster -1	1461	1.35503	0.0253001	sp|Q5VT52|RPRD2_HUMAN	Q5VT52	RPRD2_HUMAN	RPRD2	Regulation of nuclear pre-mRNA domain-containing protein 2
1.64648	-0.566375	0.0444604	0.609202	0.550278	0.925687	-1.10023	-1.05857	-1.05093	+	Cluster -1	1958	1.41758	0.0230742	sp|Q5T5U3|RHG21_HUMAN	Q5T5U3	RHG21_HUMAN	ARHGAP21	Rho GTPase-activating protein 21
1.74629	-0.82088	-0.128001	0.419301	0.887465	0.755326	-0.971112	-0.955818	-0.932567	+	Cluster -1	2492	1.02415	0.0471884	sp|P46100|ATRX_HUMAN	P46100	ATRX_HUMAN	ATRX	Transcriptional regulator ATRX
0.999264	-0.639274	-0.260495	1.10949	0.684417	1.16452	-1.28428	-0.535283	-1.23836	+	Cluster -1	580	1.83097	0.0120847	sp|Q5T6S3|PHF19_HUMAN	Q5T6S3	PHF19_HUMAN	PHF19	PHD finger protein 19
1.44211	-0.83575	-0.305342	0.99538	0.540138	0.93235	-0.926512	-0.462269	-1.3801	+	Cluster -1	1009	1.12094	0.0383926	sp|Q14289|FAK2_HUMAN	Q14289	FAK2_HUMAN	PTK2B	Protein-tyrosine kinase 2-beta
1.52913	-0.597347	-0.74362	0.915908	0.98259	0.652952	-0.913807	-0.814378	-1.01143	+	Cluster -1	1689	1.14727	0.0363912	sp|Q86U86|PB1_HUMAN	Q86U86	PB1_HUMAN	PBRM1	Protein polybromo-1
1.38581	-0.445405	-0.274287	0.747731	0.938125	0.889594	-1.10491	-0.87879	-1.25787	+	Cluster -1	986	1.71893	0.014591	sp|Q92974|ARHG2_HUMAN	Q92974	ARHG2_HUMAN	ARHGEF2	Rho guanine nucleotide exchange factor 2
1.40891	-0.672328	-0.336069	0.881711	0.953864	0.727498	-0.755259	-0.768988	-1.43934	+	Cluster -1	694	1.35431	0.0253527	sp|P42166|LAP2A_HUMAN	P42166	LAP2A_HUMAN	TMPO	Lamina-associated polypeptide 2, isoform alpha
1.13032	-0.228427	0.0229352	0.530123	1.23619	0.821331	-1.08929	-1.03345	-1.38973	+	Cluster -1	485	2.29866	0.00652416	sp|P51648|AL3A2_HUMAN	P51648	AL3A2_HUMAN	ALDH3A2	Aldehyde dehydrogenase family 3 member A2
1.1999	-0.383118	-0.00496146	0.958673	1.15947	0.490427	-1.20139	-1.15516	-1.06384	+	Cluster -1	227	2.08684	0.00891769	sp|Q9UIJ7|KAD3_HUMAN	Q9UIJ7	KAD3_HUMAN	AK3	GTP:AMP phosphotransferase AK3, mitochondrial
1.10989	-0.100531	-0.258921	0.927135	1.08448	0.724712	-1.31471	-0.939856	-1.2322	+	Cluster -1	1217	2.40409	0.00572652	sp|Q9UQE7|SMC3_HUMAN	Q9UQE7	SMC3_HUMAN	SMC3	Structural maintenance of chromosomes protein 3
1.43267	0.118726	-0.142591	0.587936	1.15682	0.239179	-1.46337	-0.673802	-1.25557	+	Cluster -1	747	1.68822	0.0153589	sp|Q1KMD3|HNRL2_HUMAN	Q1KMD3	HNRL2_HUMAN	HNRNPUL2	Heterogeneous nuclear ribonucleoprotein U-like protein 2
1.08053	0.132541	-0.221734	0.812914	1.37819	0.311908	-1.30981	-1.03526	-1.14928	+	Cluster -1	2229	2.16897	0.00788303	sp|Q5JSZ5|PRC2B_HUMAN	Q5JSZ5	PRC2B_HUMAN	PRRC2B	Protein PRRC2B
0.820768	-0.0907092	-0.679988	1.08895	1.36615	0.562446	-1.1157	-0.565219	-1.3867	+	Cluster -1	1824	1.92391	0.0107458	sp|P55196|AFAD_HUMAN	P55196	AFAD_HUMAN	AFDN	Afadin
0.786774	-0.104012	-0.367421	0.521644	1.43156	1.02871	-0.881569	-0.924519	-1.49116	+	Cluster -1	1259	2.2906	0.00661739	sp|P28290|ITPI2_HUMAN	P28290	ITPI2_HUMAN	ITPRID2	Protein ITPRID2
0.618125	-0.27176	-0.404533	1.06697	1.28011	0.923475	-0.697342	-1.0322	-1.48284	+	Cluster -1	313	2.71765	0.00413568	sp|P04818|TYSY_HUMAN	P04818	TYSY_HUMAN	TYMS	Thymidylate synthase
0.643337	-0.575842	-0.240694	0.879832	0.754732	1.30144	-0.8176	-0.0785212	-1.86668	+	Cluster -1	227	1.47832	0.0208208	sp|Q5JUR7|TEX30_HUMAN	Q5JUR7	TEX30_HUMAN	TEX30	Testis-expressed protein 30
0.661941	-0.722829	-0.633888	0.784177	0.964601	1.40711	-0.92493	-0.0343488	-1.50183	+	Cluster -1	219	1.51535	0.0195811	sp|Q86UA6|RIP_HUMAN	Q86UA6	RIP_HUMAN	RPAIN	RPA-interacting protein
0.972293	-0.469271	-0.462496	0.813631	0.723825	1.43375	-0.811557	-0.712822	-1.48736	+	Cluster -1	1288	1.7847	0.0130539	sp|Q96NU0|CNT3B_HUMAN	Q96NU0	CNT3B_HUMAN	CNTNAP3B	Contactin-associated protein-like 3B
0.748151	-0.692857	-0.596483	0.809666	1.11648	1.41087	-1.02244	-0.669942	-1.10344	+	Cluster -1	1423	2.10923	0.00863133	sp|O94964|SOGA1_HUMAN	O94964	SOGA1_HUMAN	SOGA1	Protein SOGA1
0.874603	-0.257749	-0.0865143	0.915308	1.09823	0.705254	-0.901085	-0.449029	-1.89902	+	Cluster -1	748	1.8571	0.0116727	sp|Q8NCD3|HJURP_HUMAN	Q8NCD3	HJURP_HUMAN	HJURP	Holliday junction recognition protein
1.06742	-0.357971	0.34462	1.02068	0.766443	0.57833	-0.961255	-0.635641	-1.82263	+	Cluster -1	582	1.89597	0.0110374	sp|Q5BKZ1|ZN326_HUMAN	Q5BKZ1	ZN326_HUMAN	ZNF326	DBIRD complex subunit ZNF326
0.912432	-0.455815	-0.11284	1.42174	0.68215	0.405092	-0.576486	-0.30953	-1.96674	+	Cluster -1	647	1.21453	0.032614	sp|P10515|ODP2_HUMAN	P10515	ODP2_HUMAN	DLAT	Dihydrolipoyllysine-residue acetyltransferase component of pyruvate dehydrogenase complex, mitochondrial
1.08841	-0.363987	-0.593518	1.71476	0.302493	0.620366	-0.745454	-0.616736	-1.40634	+	Cluster -1	975	1.22665	0.0318436	sp|Q96G01|BICD1_HUMAN	Q96G01	BICD1_HUMAN	BICD1	Protein bicaudal D homolog 1
0.746027	-0.301886	-0.374471	1.6695	0.63534	0.611717	-1.54851	-0.390511	-1.0472	+	Cluster -1	559	1.68767	0.0153866	sp|P32189|GLPK_HUMAN	P32189	GLPK_HUMAN	GK	Glycerol kinase
0.747107	-0.541376	-0.66462	1.40501	1.04929	0.796991	-0.965047	-0.468809	-1.35855	+	Cluster -1	213	1.9384	0.0106549	sp|Q9NVV9|THAP1_HUMAN	Q9NVV9	THAP1_HUMAN	THAP1	THAP domain-containing protein 1
0.934461	-0.823638	-0.678864	1.37067	0.769028	0.95258	-0.899576	-0.321921	-1.30274	+	Cluster -1	462	1.47384	0.0208729	sp|Q6UW02|CP20A_HUMAN	Q6UW02	CP20A_HUMAN	CYP20A1	Cytochrome P450 20A1
0.808356	-0.889566	-0.0691841	1.33137	1.01476	0.69367	-1.26761	-0.395548	-1.22625	+	Cluster -1	444	1.72447	0.0144446	sp|O60427|FADS1_HUMAN	O60427	FADS1_HUMAN	FADS1	Acyl-CoA (8-3)-desaturase
-0.20926	-1.2699	-0.411823	1.31951	1.4457	0.511692	-0.0833011	0.131532	-1.43415	+	Cluster -1	336	1.47014	0.0209942	sp|Q96HH6|TMM19_HUMAN	Q96HH6	TMM19_HUMAN	TMEM19	Transmembrane protein 19
-0.129988	-1.23008	-0.0510642	1.15939	1.33056	0.499973	-0.249542	0.373917	-1.70316	+	Cluster -1	541	1.06761	0.0431838	sp|Q5T9L3|WLS_HUMAN	Q5T9L3	WLS_HUMAN	WLS	Protein wntless homolog
-0.0171901	-1.70234	-0.540578	1.49167	1.16268	0.408947	-0.299632	0.399686	-0.903239	+	Cluster -1	346	1.29789	0.0282869	sp|Q9NWY4|HPF1_HUMAN	Q9NWY4	HPF1_HUMAN	HPF1	Histone PARylation factor 1
-0.0856136	-1.06177	-1.07985	1.24571	0.751537	1.04311	-0.106981	0.703763	-1.40991	+	Cluster -1	194	1.25858	0.029971	sp|Q8IXQ3|CI040_HUMAN	Q8IXQ3	CI040_HUMAN	C9orf40	Uncharacterized protein C9orf40
0.827598	-1.16379	-1.05807	0.980478	1.44279	0.544421	-0.634203	0.104188	-1.04341	+	Cluster -1	621	1.0436	0.0454368	sp|O75928|PIAS2_HUMAN	O75928	PIAS2_HUMAN	PIAS2	E3 SUMO-protein ligase PIAS2
0.531483	-0.976888	-0.898625	1.07832	1.28335	0.593068	-0.659943	0.501013	-1.45178	+	Cluster -1	395	1.0321	0.0465695	sp|Q06547|GABP1_HUMAN	Q06547	GABP1_HUMAN	GABPB1	GA-binding protein subunit beta-1
0.538532	-1.33125	-0.480631	1.12378	1.05858	0.906557	-1.26596	0.336645	-0.886247	+	Cluster -1	646	1.20187	0.033311	sp|P11142|HSP7C_HUMAN	P11142	HSP7C_HUMAN	HSPA8	Heat shock cognate 71 kDa protein
0.65405	-1.14022	-0.364753	0.955888	1.07542	1.11803	-1.09216	0.0671316	-1.27339	+	Cluster -1	730	1.41922	0.0230644	sp|P52272|HNRPM_HUMAN	P52272	HNRPM_HUMAN	HNRNPM	Heterogeneous nuclear ribonucleoprotein M
0.152726	-0.814484	0.90122	1.47836	0.260585	0.986566	-0.98694	-0.574313	-1.40372	+	Cluster -1	137	1.47725	0.0208237	sp|Q9BUV8|RCAF1_HUMAN	Q9BUV8	RCAF1_HUMAN	RAB5IF	Respirasome Complex Assembly Factor 1
0.692994	-0.915596	0.583824	1.45397	0.106092	0.971201	-1.39947	-0.43106	-1.06195	+	Cluster -1	542	1.26412	0.0297346	sp|Q5TKA1|LIN9_HUMAN	Q5TKA1	LIN9_HUMAN	LIN9	Protein lin-9 homolog
0.666636	-0.555231	1.17477	1.35992	0.0750321	0.363301	-1.44426	-0.346133	-1.29403	+	Cluster -1	275	1.19405	0.033687	sp|P19387|RPB3_HUMAN	P19387	RPB3_HUMAN	POLR2C	DNA-directed RNA polymerase II subunit RPB3
0.385941	-0.407563	0.505594	1.47913	0.719728	0.19304	-1.86316	0.0861171	-1.09884	+	Cluster -1	509	1.17043	0.0350917	sp|P09622|DLDH_HUMAN	P09622	DLDH_HUMAN	DLD	Dihydrolipoyl dehydrogenase, mitochondrial
0.0455305	-0.688977	0.0898601	1.1877	0.493695	1.35443	-1.88831	0.0800151	-0.673949	+	Cluster -1	366	1.38092	0.0244881	sp|P50213|IDH3A_HUMAN	P50213	IDH3A_HUMAN	IDH3A	Isocitrate dehydrogenase [NAD] subunit alpha, mitochondrial
-0.168158	-0.538087	0.236502	1.3098	0.607337	1.41374	-1.05513	-0.270935	-1.53508	+	Cluster -1	220	2.18143	0.00773144	sp|Q8NB37|GALD1_HUMAN	Q8NB37	GALD1_HUMAN	GATD1	Glutamine amidotransferase-like class 1 domain-containing protein 1
-0.672355	-0.8634	0.204808	1.54474	0.256277	1.55067	-0.832466	-0.0916314	-1.09665	+	Cluster -1	252	1.62195	0.0168517	sp|Q8N2A8|PLD6_HUMAN	Q8N2A8	PLD6_HUMAN	PLD6	Mitochondrial cardiolipin hydrolase
-0.477238	-1.10946	0.0514477	1.03776	0.761393	1.75082	-1.08556	-0.143231	-0.78594	+	Cluster -1	606	2.04854	0.00921951	sp|O14678|ABCD4_HUMAN	O14678	ABCD4_HUMAN	ABCD4	Lysosomal cobalamin transporter ABCD4
0.798029	-0.398126	0.655399	-0.0628472	0.218638	1.7516	-0.378318	-1.58595	-0.998427	+	Cluster -1	792	1.08072	0.042014	sp|Q9Y5Z7|HCFC2_HUMAN	Q9Y5Z7	HCFC2_HUMAN	HCFC2	Host cell factor 2
1.05642	0.122793	0.643088	0.149722	-0.070323	1.2489	-0.338645	-2.03844	-0.773512	+	Cluster -1	235	1.27956	0.0291872	sp|Q9BQD7|ANKMT_HUMAN	Q9BQD7	ANKMT_HUMAN	ANTKMT	Adenine nucleotide translocase lysine N-methyltransferase
0.744051	-0.404438	0.996703	0.80523	0.37959	0.924664	-0.882667	-1.81915	-0.743987	+	Cluster -1	176	1.83011	0.0121001	sp|Q5BJF2|SGMR2_HUMAN	Q5BJF2	SGMR2_HUMAN	TMEM97	Sigma intracellular receptor 2
0.866653	-0.0782649	0.325701	0.505	0.451342	1.44807	-0.823993	-1.71598	-0.978526	+	Cluster -1	541	2.15299	0.0080025	sp|Q16880|CGT_HUMAN	Q16880	CGT_HUMAN	UGT8	2-hydroxyacylsphingosine 1-beta-galactosyltransferase
0.96875	-0.324763	0.559686	0.655783	0.389885	1.30224	-0.88611	-1.44965	-1.21582	+	Cluster -1	442	2.20297	0.00731143	sp|O75386|TULP3_HUMAN	O75386	TULP3_HUMAN	TULP3	Tubby-related protein 3
0.835634	-0.940771	1.13375	0.726979	-0.158138	1.29515	-0.691948	-1.10808	-1.09258	+	Cluster -1	137	1.00463	0.0496159	sp|Q8WV07|LTO1_HUMAN	Q8WV07	LTO1_HUMAN	LTO1	Protein LTO1 homolog
0.305028	-1.19051	0.145099	0.986136	0.890417	1.51246	-1.02239	-0.657955	-0.968286	+	Cluster -1	916	2.0565	0.00925926	sp|P55283|CADH4_HUMAN	P55283	CADH4_HUMAN	CDH4	Cadherin-4
0.446572	-1.15054	0.113786	1.00278	0.605177	1.61853	-1.18746	-0.804416	-0.644425	+	Cluster -1	478	1.74439	0.0140506	sp|Q8TC44|POC1B_HUMAN	Q8TC44	POC1B_HUMAN	POC1B	POC1 centriolar protein homolog B
0.493312	-1.05217	0.0825962	0.742888	0.699779	1.71239	-0.492625	-0.957889	-1.22828	+	Cluster -1	685	1.67357	0.0156884	sp|Q9Y252|RNF6_HUMAN	Q9Y252	RNF6_HUMAN	RNF6	E3 ubiquitin-protein ligase RNF6
0.686788	-1.39636	0.272541	0.550117	0.59857	1.66793	-0.671804	-0.578448	-1.12933	+	Cluster -1	548	1.11314	0.0391325	sp|Q9NWZ5|UCKL1_HUMAN	Q9NWZ5	UCKL1_HUMAN	UCKL1	Uridine-cytidine kinase-like 1
0.295305	-0.822928	-0.169598	0.931359	0.592245	1.82815	-0.554944	-1.30903	-0.79056	+	Cluster -1	1083	1.98436	0.00996607	sp|Q9UPN4|CP131_HUMAN	Q9UPN4	CP131_HUMAN	CEP131	Centrosomal protein of 131 kDa
0.359453	-0.552912	0.309149	1.01092	0.273711	1.68445	-0.861014	-1.51273	-0.711023	+	Cluster -1	166	1.88325	0.0112777	sp|Q9NX18|SDHF2_HUMAN	Q9NX18	SDHF2_HUMAN	SDHAF2	Succinate dehydrogenase assembly factor 2, mitochondrial
0.160526	-0.807039	0.713864	1.01297	0.595468	1.34515	-1.02387	-1.5374	-0.459673	+	Cluster -1	1099	1.77492	0.013185	sp|Q15032|R3HD1_HUMAN	Q15032	R3HD1_HUMAN	R3HDM1	R3H domain-containing protein 1
-0.132884	-0.468972	0.312238	1.48136	0.293042	1.34362	-0.804323	-1.67684	-0.347246	+	Cluster -1	1039	1.76468	0.0134667	sp|Q9P2Q2|FRM4A_HUMAN	Q9P2Q2	FRM4A_HUMAN	FRMD4A	FERM domain-containing protein 4A
-0.204624	0.734456	-0.283889	1.34942	0.561227	0.582681	-1.68508	-1.38369	0.329499	+	Cluster -1	239	1.11239	0.0391873	sp|P28072|PSB6_HUMAN	P28072	PSB6_HUMAN	PSMB6	Proteasome subunit beta type-6
0.19189	-0.312422	0.275319	1.60462	0.928731	0.573333	-1.58743	-1.06348	-0.610565	+	Cluster -1	414	2.44049	0.0052	sp|P25490|TYY1_HUMAN	P25490	TYY1_HUMAN	YY1	Transcriptional repressor protein YY1
-0.131423	0.311318	0.398702	1.3543	0.863203	0.604809	-1.90175	-0.893469	-0.605693	+	Cluster -1	413	2.29166	0.00661438	sp|Q9H6R6|ZDHC6_HUMAN	Q9H6R6	ZDHC6_HUMAN	ZDHHC6	Palmitoyltransferase ZDHHC6
0.0682053	0.520962	0.222487	1.22398	0.527341	1.0578	-1.66911	-1.18661	-0.765057	+	Cluster -1	653	3.03298	0.00296243	sp|P33908|MA1A1_HUMAN	P33908	MA1A1_HUMAN	MAN1A1	Mannosyl-oligosaccharide 1,2-alpha-mannosidase IA
0.318404	0.323619	0.0185356	1.00715	0.846712	1.08515	-1.67402	-1.30078	-0.62477	+	Cluster -1	677	3.25795	0.00297831	sp|Q15061|WDR43_HUMAN	Q15061	WDR43_HUMAN	WDR43	WD repeat-containing protein 43
0.486286	0.389933	-0.662153	1.14261	0.758462	1.14204	-1.62119	-0.921596	-0.714388	+	Cluster -1	1735	2.30723	0.00642191	sp|Q2KHR3|QSER1_HUMAN	Q2KHR3	QSER1_HUMAN	QSER1	Glutamine and serine-rich protein 1
0.613974	0.168504	-0.242527	1.09401	0.900595	0.698535	-2.01376	-0.957042	-0.262296	+	Cluster -1	115	1.80563	0.0127038	sp|P05387|RLA2_HUMAN	P05387	RLA2_HUMAN	RPLP2	60S acidic ribosomal protein P2
0.160115	0.0678072	0.596363	0.762014	0.604299	1.35601	-0.793136	-0.924154	-1.82932	+	Cluster -1	410	2.57286	0.00446217	sp|Q9Y679|AUP1_HUMAN	Q9Y679	AUP1_HUMAN	AUP1	Lipid droplet-regulating VLDL assembly factor AUP1
0.125717	0.037827	1.07349	0.665904	0.584007	0.953048	-0.403498	-1.09126	-1.94523	+	Cluster -1	597	1.85414	0.0116946	sp|Q9H1C4|UN93B_HUMAN	Q9H1C4	UN93B_HUMAN	UNC93B1	Protein unc-93 homolog B1
0.39222	-0.527453	0.457409	0.994932	1.07622	1.01273	-0.681729	-1.29438	-1.42996	+	Cluster -1	2073	2.80638	0.0039388	sp|Q5JSL3|DOC11_HUMAN	Q5JSL3	DOC11_HUMAN	DOCK11	Dedicator of cytokinesis protein 11
0.308526	-0.492288	0.804076	1.06676	0.679777	1.07649	-0.904157	-0.941125	-1.59806	+	Cluster -1	152	2.40503	0.00574071	sp|Q53GA4|PHLA2_HUMAN	Q53GA4	PHLA2_HUMAN	PHLDA2	Pleckstrin homology-like domain family A member 2
-0.28144	0.0578585	1.16089	0.323273	1.56328	0.518834	-1.11942	-0.993998	-1.22927	+	Cluster -1	297	1.77147	0.0132315	sp|Q5U3C3|TM164_HUMAN	Q5U3C3	TM164_HUMAN	TMEM164	Transmembrane protein 164
-0.195294	-0.0346817	1.33802	0.387492	1.15103	0.704184	-0.827782	-0.854326	-1.66864	+	Cluster -1	358	1.6989	0.0150758	sp|O95210|STBD1_HUMAN	O95210	STBD1_HUMAN	STBD1	Starch-binding domain-containing protein 1
-0.471153	-0.120762	0.976656	0.839627	1.26231	0.731122	-0.943826	-0.636815	-1.63716	+	Cluster -1	266	1.92631	0.0107116	sp|Q8WV22|NSE1_HUMAN	Q8WV22	NSE1_HUMAN	NSMCE1	Non-structural maintenance of chromosomes element 1 homolog
-0.327101	-0.244332	1.14992	0.794118	1.23742	0.640749	-0.993298	-0.679379	-1.5781	+	Cluster -1	193	1.81562	0.0124562	sp|P17900|SAP3_HUMAN	P17900	SAP3_HUMAN	GM2A	Ganglioside GM2 activator
0.187506	-0.100683	1.10547	0.982612	1.07257	0.393344	-1.38267	-1.11177	-1.14638	+	Cluster -1	1742	2.57424	0.0044759	sp|Q9NQX4|MYO5C_HUMAN	Q9NQX4	MYO5C_HUMAN	MYO5C	Unconventional myosin-Vc
0.11883	-0.0352888	0.990919	0.793313	1.1876	0.624662	-1.14207	-1.11437	-1.4236	+	Cluster -1	1028	2.93962	0.00321163	sp|P12109|CO6A1_HUMAN	P12109	CO6A1_HUMAN	COL6A1	Collagen alpha-1(VI) chain
-0.311851	0.181863	0.457296	1.11529	0.773359	1.26306	-0.809587	-1.28501	-1.38441	+	Cluster -1	495	3.33483	0.00275862	sp|Q9H9S5|FKRP_HUMAN	Q9H9S5	FKRP_HUMAN	FKRP	Fukutin-related protein
-0.713668	0.1489	0.844274	1.46049	0.62544	0.805849	-0.731594	-1.03169	-1.40801	+	Cluster -1	367	1.91898	0.0107767	sp|Q13303|KCAB2_HUMAN	Q13303	KCAB2_HUMAN	KCNAB2	Voltage-gated potassium channel subunit beta-2
-0.677609	0.772408	0.453934	1.03282	0.581646	1.11867	-0.736694	-0.885236	-1.65993	+	Cluster -1	643	1.92947	0.0106287	sp|Q0P6H9|TMM62_HUMAN	Q0P6H9	TMM62_HUMAN	TMEM62	Transmembrane protein 62
0.241867	-0.514353	0.149006	0.367049	1.12997	1.69323	-0.647902	-1.3337	-1.08518	+	Cluster -1	610	2.20971	0.0072619	sp|O14967|CLGN_HUMAN	O14967	CLGN_HUMAN	CLGN	Calmegin
-0.0202574	-0.347102	0.206041	0.919695	1.26811	1.29791	-1.03571	-1.201	-1.08769	+	Cluster -1	663	4.47746	0	sp|Q8N392|RHG18_HUMAN	Q8N392	RHG18_HUMAN	ARHGAP18	Rho GTPase-activating protein 18
-0.281969	-0.190426	0.36254	0.721474	1.50485	1.166	-1.01682	-1.07095	-1.19469	+	Cluster -1	1023	3.44506	0.00295758	sp|P05023|AT1A1_HUMAN	P05023	AT1A1_HUMAN	ATP1A1	Sodium/potassium-transporting ATPase subunit alpha-1
0.353045	-0.302041	0.0536614	0.482321	1.1336	1.55421	-1.42313	-0.693054	-1.15861	+	Cluster -1	382	2.61907	0.00448366	sp|Q16644|MAPK3_HUMAN	Q16644	MAPK3_HUMAN	MAPKAPK3	MAP kinase-activated protein kinase 3
0.238807	0.0504995	-0.00290271	0.905578	1.24898	1.06766	-1.46377	-0.716496	-1.32835	+	Cluster -1	415	3.8763	0.00187978	sp|P52597|HNRPF_HUMAN	P52597	HNRPF_HUMAN	HNRNPF	Heterogeneous nuclear ribonucleoprotein F
0.387952	-0.225473	0.449084	0.209849	1.58387	0.990848	-1.37254	-0.755673	-1.26792	+	Cluster -1	380	2.22862	0.00719892	sp|Q6DKK2|TTC19_HUMAN	Q6DKK2	TTC19_HUMAN	TTC19	Tetratricopeptide repeat protein 19, mitochondrial
0.416889	-0.32185	0.425693	0.694339	1.27705	1.01831	-1.1184	-0.822028	-1.57001	+	Cluster -1	829	2.96394	0.00322689	sp|P23508|CRCM_HUMAN	P23508	CRCM_HUMAN	MCC	Colorectal mutant cancer protein
0.745415	-0.383858	0.376422	1.3705	0.938501	0.307138	-0.845134	-1.72362	-0.78536	+	Cluster -1	78	1.95288	0.0104672	sp|Q7Z7J9|CK2N1_HUMAN	Q7Z7J9	CK2N1_HUMAN	CAMK2N1	Calcium/calmodulin-dependent protein kinase II inhibitor 1
1.03875	-0.312804	0.39666	1.25562	0.830355	0.163006	-0.708041	-1.73464	-0.928908	+	Cluster -1	595	1.73967	0.0142002	sp|Q96PQ6|ZN317_HUMAN	Q96PQ6	ZN317_HUMAN	ZNF317	Zinc finger protein 317
0.727892	-0.330018	0.587804	0.831212	1.06392	0.552775	-0.835473	-1.93712	-0.660998	+	Cluster -1	1053	1.98098	0.0100225	sp|O15084|ANR28_HUMAN	O15084	ANR28_HUMAN	ANKRD28	Serine/threonine-protein phosphatase 6 regulatory ankyrin repeat subunit A
1.04929	-0.0629573	0.536319	1.13173	0.879825	0.072645	-0.892932	-1.54027	-1.17365	+	Cluster -1	717	2.23169	0.00714189	sp|Q9UH99|SUN2_HUMAN	Q9UH99	SUN2_HUMAN	SUN2	SUN domain-containing protein 2
0.788622	0.257016	0.542006	1.1012	1.01628	0.0247696	-1.14678	-1.53731	-1.04581	+	Cluster -1	846	2.71888	0.0041461	sp|Q8IWW6|RHG12_HUMAN	Q8IWW6	RHG12_HUMAN	ARHGAP12	Rho GTPase-activating protein 12
0.742067	0.147113	0.337862	1.22578	0.986546	0.317064	-1.28248	-1.36395	-1.11	+	Cluster -1	372	3.24682	0.00294286	sp|O60547|GMDS_HUMAN	O60547	GMDS_HUMAN	GMDS	GDP-mannose 4,6 dehydratase
0.64033	-0.204986	0.33402	0.71166	1.18014	0.94881	-0.81033	-1.57495	-1.22469	+	Cluster -1	867	3.0514	0.00301639	sp|A0AVK6|E2F8_HUMAN	A0AVK6	E2F8_HUMAN	E2F8	Transcription factor E2F8
0.823882	0.0953608	-0.105235	0.700301	1.03889	1.04059	-0.817144	-1.63923	-1.13741	+	Cluster -1	519	2.849	0.00376912	sp|Q9Y5Q8|TF3C5_HUMAN	Q9Y5Q8	TF3C5_HUMAN	GTF3C5	General transcription factor 3C polypeptide 5
0.831731	0.0494598	0.0103462	0.800522	0.954511	1.02282	-0.869754	-1.27311	-1.52653	+	Cluster -1	483	3.22186	0.00307483	sp|P26196|DDX6_HUMAN	P26196	DDX6_HUMAN	DDX6	Probable ATP-dependent RNA helicase DDX6
0.560942	0.108428	0.00776271	1.26246	0.664429	1.0154	-0.875829	-1.56735	-1.17624	+	Cluster -1	919	3.38631	0.00293785	sp|P18858|DNLI1_HUMAN	P18858	DNLI1_HUMAN	LIG1	DNA ligase 1
0.81765	0.40855	0.0841803	0.871675	0.670608	0.99046	-1.14095	-1.43554	-1.26663	+	Cluster -1	279	4.01822	0.0021039	sp|Q9BQ75|CMS1_HUMAN	Q9BQ75	CMS1_HUMAN	CMSS1	Protein CMSS1
0.999904	0.261747	0.340317	0.867465	0.529562	0.780616	-0.87003	-1.75793	-1.15165	+	Cluster -1	560	2.99669	0.00310727	sp|Q99741|CDC6_HUMAN	Q99741	CDC6_HUMAN	CDC6	Cell division control protein 6 homolog
0.887163	0.304271	0.365727	0.788516	0.681486	0.808381	-0.85318	-1.68064	-1.30173	+	Cluster -1	1410	3.47027	0.002825	sp|Q7Z3K3|POGZ_HUMAN	Q7Z3K3	POGZ_HUMAN	POGZ	Pogo transposable element with ZNF domain
0.870411	-0.0512703	0.483365	0.934569	0.631298	0.931287	-1.098	-1.42757	-1.27409	+	Cluster -1	375	3.50384	0.00295425	sp|P08571|CD14_HUMAN	P08571	CD14_HUMAN	CD14	Monocyte differentiation antigen CD14
0.490176	-0.0473524	0.462131	1.0582	0.754849	1.02592	-1.25314	-1.4998	-0.990987	+	Cluster -1	898	4.01138	0.00206369	sp|Q9ULV3|CIZ1_HUMAN	Q9ULV3	CIZ1_HUMAN	CIZ1	Cip1-interacting zinc finger protein
0.453409	0.0921583	0.374663	0.98372	1.04621	0.816831	-1.45851	-1.40354	-0.904941	+	Cluster -1	499	4.33874	0.000244898	sp|Q99640|PMYT1_HUMAN	Q99640	PMYT1_HUMAN	PKMYT1	Membrane-associated tyrosine- and threonine-specific cdc2-inhibitory kinase
0.704066	-0.293699	0.171731	1.04359	0.793316	1.16606	-1.29281	-1.06915	-1.22311	+	Cluster -1	498	3.38157	0.00291317	sp|Q9BT92|TCHP_HUMAN	Q9BT92	TCHP_HUMAN	TCHP	Trichoplein keratin filament-binding protein
0.82788	-0.0926082	0.182078	1.13185	0.726707	0.934394	-1.22871	-1.27038	-1.2112	+	Cluster -1	863	3.53512	0.00285121	sp|Q92995|UBP13_HUMAN	Q92995	UBP13_HUMAN	USP13	Ubiquitin carboxyl-terminal hydrolase 13
0.636954	-0.391359	0.301528	1.21218	0.756159	1.02017	-1.01682	-1.43569	-1.08312	+	Cluster -1	2322	3.0733	0.00298507	sp|Q6UVK1|CSPG4_HUMAN	Q6UVK1	CSPG4_HUMAN	CSPG4	Chondroitin sulfate proteoglycan 4
0.781824	-0.434291	0.626818	0.834549	1.03192	0.78073	-1.00651	-1.26217	-1.35287	+	Cluster -1	352	2.74119	0.0041287	sp|Q96JY6|PDLI2_HUMAN	Q96JY6	PDLI2_HUMAN	PDLIM2	PDZ and LIM domain protein 2
0.591126	-0.424172	0.493473	1.10468	1.039	0.773847	-1.02383	-1.37308	-1.18105	+	Cluster -1	838	3.08404	0.00303605	sp|Q96D09|GASP2_HUMAN	Q96D09	GASP2_HUMAN	GPRASP2	G-protein coupled receptor-associated sorting protein 2
0.703535	-0.283164	0.349956	1.08105	1.01961	0.765173	-0.95793	-1.29157	-1.38666	+	Cluster -1	302	3.25598	0.00295694	sp|Q8TDX7|NEK7_HUMAN	Q8TDX7	NEK7_HUMAN	NEK7	Serine/threonine-protein kinase Nek7
0.863199	-0.529799	0.279491	0.984836	1.11755	0.778065	-1.12832	-1.14989	-1.21512	+	Cluster -1	533	2.65651	0.00431121	sp|P24557|THAS_HUMAN	P24557	THAS_HUMAN	TBXAS1	Thromboxane-A synthase
0.788616	-0.0970369	0.169503	1.03636	1.09856	0.700531	-1.19404	-1.32666	-1.17582	+	Cluster -1	5890	3.56589	0.00262456	sp|Q09666|AHNK_HUMAN	Q09666	AHNK_HUMAN	AHNAK	Neuroblast differentiation-associated protein AHNAK
0.563075	-0.344724	0.0725757	1.24239	1.14758	0.800521	-1.17839	-1.05936	-1.24367	+	Cluster -1	649	3.51538	0.00295302	sp|Q16881|TRXR1_HUMAN	Q16881	TRXR1_HUMAN	TXNRD1	Thioredoxin reductase 1, cytoplasmic
0.589101	-0.221618	0.0865423	0.918827	1.20147	0.988837	-1.00336	-1.12536	-1.43444	+	Cluster -1	689	3.67368	0.00196639	sp|O15231|ZN185_HUMAN	O15231	ZN185_HUMAN	ZNF185	Zinc finger protein 185
0.460541	0.511302	-0.0993089	1.07242	0.993447	0.809259	-1.26099	-1.09697	-1.3897	+	Cluster -1	1365	4.23879	0.000212389	sp|O96028|NSD2_HUMAN	O96028	NSD2_HUMAN	NSD2	Histone-lysine N-methyltransferase NSD2
0.367599	0.544708	-0.197736	1.24738	0.830342	0.87904	-1.29921	-1.25502	-1.1171	+	Cluster -1	670	3.83098	0.0017641	sp|Q9NVP1|DDX18_HUMAN	Q9NVP1	DDX18_HUMAN	DDX18	ATP-dependent RNA helicase DDX18
0.283516	0.531199	-0.086271	1.04323	0.856055	1.00212	-0.931966	-0.963774	-1.73412	+	Cluster -1	627	3.32142	0.0027013	sp|Q86XI8|ZSWM9_HUMAN	Q86XI8	ZSWM9_HUMAN	ZSWIM9	Uncharacterized protein ZSWIM9
0.449232	-0.0139688	0.1855	1.11402	1.2934	0.485948	-0.681517	-1.15441	-1.67821	+	Cluster -1	233	2.75618	0.00408901	sp|Q9H8W3|F204A_HUMAN	Q9H8W3	F204A_HUMAN	FAM204A	Protein FAM204A
0.264191	0.228921	0.0859601	1.16315	1.0523	0.904301	-1.09896	-1.35003	-1.24984	+	Cluster -1	650	5.94428	0	sp|Q96G46|DUS3L_HUMAN	Q96G46	DUS3L_HUMAN	DUS3L	tRNA-dihydrouridine(47) synthase [NAD(P)(+)]-like
0.205761	-0.0288806	0.125072	1.23631	1.2991	0.700499	-0.976966	-1.25998	-1.30091	+	Cluster -1	739	4.24739	0.000218182	sp|Q15022|SUZ12_HUMAN	Q15022	SUZ12_HUMAN	SUZ12	Polycomb protein SUZ12
0.232632	-0.042935	-0.0237372	0.965754	1.52364	0.81031	-1.043	-1.28286	-1.1398	+	Cluster -1	499	4.04807	0.00136842	sp|P53041|PPP5_HUMAN	P53041	PPP5_HUMAN	PPP5C	Serine/threonine-protein phosphatase 5
0.0306638	0.0883152	0.471202	1.23542	0.978449	0.829273	-0.882356	-1.24231	-1.50865	+	Cluster -1	271	3.914	0.00195455	sp|P15407|FOSL1_HUMAN	P15407	FOSL1_HUMAN	FOSL1	Fos-related antigen 1
0.0672218	0.471909	0.587183	0.977662	0.923865	0.799258	-1.04586	-1.29478	-1.48646	+	Cluster -1	332	4.44693	0	sp|Q9UKF7|PITC1_HUMAN	Q9UKF7	PITC1_HUMAN	PITPNC1	Cytoplasmic phosphatidylinositol transfer protein 1
0.486216	0.156296	0.429617	0.963008	1.0689	0.732168	-1.32279	-1.11495	-1.39846	+	Cluster -1	1505	5.0596	0	sp|P39880|CUX1_HUMAN	P39880	CUX1_HUMAN	CUX1	Homeobox protein cut-like 1
0.312838	0.29772	0.431047	0.95597	1.09663	0.755147	-1.24955	-1.30787	-1.29193	+	Cluster -1	793	6.14847	0	sp|Q96T88|UHRF1_HUMAN	Q96T88	UHRF1_HUMAN	UHRF1	E3 ubiquitin-protein ligase UHRF1
0.229321	0.125532	0.501654	1.07794	0.738513	1.07878	-1.1646	-1.06345	-1.52369	+	Cluster -1	578	4.41776	0	sp|Q969N2|PIGT_HUMAN	Q969N2	PIGT_HUMAN	PIGT	GPI transamidase component PIG-T
0.245061	0.355441	0.470948	0.931521	0.915419	0.923373	-1.29552	-1.03497	-1.51127	+	Cluster -1	314	5.27639	0	sp|Q8NGE9|OR9Q2_HUMAN	Q8NGE9	OR9Q2_HUMAN	OR9Q2	Olfactory receptor 9Q2
0.00202337	0.275055	0.374419	0.897436	1.17302	0.971608	-1.40203	-1.32949	-0.962051	+	Cluster -1	1602	4.64509	0	sp|Q5T5Y3|CAMP1_HUMAN	Q5T5Y3	CAMP1_HUMAN	CAMSAP1	Calmodulin-regulated spectrin-associated protein 1
0.00529213	0.10585	0.35732	1.05718	1.29139	0.787621	-1.48567	-1.01971	-1.09928	+	Cluster -1	1127	4.20565	0.000198347	sp|Q8IWB9|TEX2_HUMAN	Q8IWB9	TEX2_HUMAN	TEX2	Testis-expressed protein 2
0.117416	-0.041431	0.634378	1.23087	0.832373	0.876008	-1.5089	-0.931285	-1.20942	+	Cluster -1	153	3.58102	0.00228777	sp|Q9P0P0|RN181_HUMAN	Q9P0P0	RN181_HUMAN	RNF181	E3 ubiquitin-protein ligase RNF181
0.140347	0.0636121	0.340772	1.43269	1.02679	0.607786	-1.32355	-1.06194	-1.22651	+	Cluster -1	141	3.85136	0.00180105	sp|P01037|CYTN_HUMAN	P01037	CYTN_HUMAN	CST1	Cystatin-SN
0.0457116	0.102008	0.593072	1.17446	0.998192	0.800621	-1.2106	-1.35129	-1.15217	+	Cluster -1	366	4.40455	0	sp|O00442|RTCA_HUMAN	O00442	RTCA_HUMAN	RTCA	RNA 3'-terminal phosphate cyclase
0.108607	0.0660134	0.891282	0.892329	0.840184	0.859228	-1.42676	-0.654482	-1.5764	+	Cluster -1	310	2.81396	0.00397195	sp|Q96KN1|LRAT2_HUMAN	Q96KN1	LRAT2_HUMAN	LRATD2	Protein LRATD2
0.197358	-0.15009	0.944959	0.767336	0.745134	0.912916	-1.64213	-0.257118	-1.51837	+	Cluster -1	345	1.93075	0.0106293	sp|Q9H3K2|GHITM_HUMAN	Q9H3K2	GHITM_HUMAN	GHITM	Growth hormone-inducible transmembrane protein
0.149877	-0.377676	0.986485	0.875768	0.757876	0.737766	-1.97695	-0.127741	-1.02541	+	Cluster -1	331	1.43083	0.0225965	sp|Q9Y274|SIA10_HUMAN	Q9Y274	SIA10_HUMAN	ST3GAL6	Type 2 lactosamine alpha-2,3-sialyltransferase
0.200457	0.123019	1.23093	0.89703	0.516056	0.358449	-1.95503	-0.201616	-1.16929	+	Cluster -1	492	1.53582	0.0189207	sp|Q9UHL4|DPP2_HUMAN	Q9UHL4	DPP2_HUMAN	DPP7	Dipeptidyl peptidase 2
0.242711	-0.32022	0.921234	0.628755	0.322969	1.41868	-1.88571	-0.804456	-0.523959	+	Cluster -1	1132	1.54377	0.0186675	sp|Q8NB49|AT11C_HUMAN	Q8NB49	AT11C_HUMAN	ATP11C	Phospholipid-transporting ATPase IG
0.173812	-0.120777	1.10077	0.675914	0.578949	1.20763	-1.42327	-0.919422	-1.2736	+	Cluster -1	1007	2.49831	0.0049403	sp|Q8WZ75|ROBO4_HUMAN	Q8WZ75	ROBO4_HUMAN	ROBO4	Roundabout homolog 4
0.313511	0.112688	0.933357	0.522255	0.919771	0.990591	-1.51223	-1.01358	-1.26637	+	Cluster -1	751	3.33672	0.00276596	sp|Q96RP9|EFGM_HUMAN	Q96RP9	EFGM_HUMAN	GFM1	Elongation factor G, mitochondrial
0.465333	-0.225171	1.01133	0.471003	0.768124	1.14736	-1.43172	-1.32454	-0.881718	+	Cluster -1	622	2.50713	0.00484666	sp|Q8IUH4|ZDH13_HUMAN	Q8IUH4	ZDH13_HUMAN	ZDHHC13	Palmitoyltransferase ZDHHC13
-0.051436	-0.760396	1.16323	0.685524	0.829807	1.24542	-1.30468	-0.801707	-1.00576	+	Cluster -1	537	1.68807	0.0153473	sp|Q8TCT0|CERK1_HUMAN	Q8TCT0	CERK1_HUMAN	CERK	Ceramide kinase
-0.201651	0.250174	0.715764	0.738872	0.327116	1.58412	-1.51021	-0.698766	-1.20542	+	Cluster -1	190	2.11477	0.00857143	sp|P62166|NCS1_HUMAN	P62166	NCS1_HUMAN	NCS1	Neuronal calcium sensor 1
-0.0658699	-0.196585	0.960446	0.730202	0.511073	1.41566	-1.31283	-0.558717	-1.48337	+	Cluster -1	911	1.99312	0.00981061	sp|Q8WUA4|TF3C2_HUMAN	Q8WUA4	TF3C2_HUMAN	GTF3C2	General transcription factor 3C polypeptide 2
-0.128637	-0.19644	0.5271	0.38725	1.16746	1.38921	-1.68779	-0.33384	-1.12432	+	Cluster -1	819	1.94455	0.0106233	sp|Q96ST2|IWS1_HUMAN	Q96ST2	IWS1_HUMAN	IWS1	Protein IWS1 homolog
-0.0133935	-0.234632	1.19728	0.162962	1.15663	0.975225	-1.74716	-0.641405	-0.855517	+	Cluster -1	282	1.54912	0.0185534	sp|Q13595|TRA2A_HUMAN	Q13595	TRA2A_HUMAN	TRA2A	Transformer-2 protein homolog alpha
0.150504	-0.126276	0.754229	0.12508	1.42827	0.9621	-1.73994	-1.07405	-0.479913	+	Cluster -1	119	1.75996	0.0135573	sp|O43805|SSNA1_HUMAN	O43805	SSNA1_HUMAN	SSNA1	Sjoegren syndrome nuclear autoantigen 1
-0.147358	0.77762	0.471162	1.05855	1.02551	0.41075	-1.65124	-0.662165	-1.28283	+	Cluster -1	74	2.46093	0.00507112	sp|Q7Z3B0|SIM15_HUMAN	Q7Z3B0	SIM15_HUMAN	SMIM15	Small integral membrane protein 15
-0.538548	0.310504	0.410049	1.03025	1.08359	0.92697	-1.79336	-0.477273	-0.952173	+	Cluster -1	336	2.23	0.00718699	sp|Q9HBH5|RDH14_HUMAN	Q9HBH5	RDH14_HUMAN	RDH14	Retinol dehydrogenase 14
-0.435374	0.723481	0.992959	0.263513	1.08658	0.690208	-1.73656	-0.403087	-1.18172	+	Cluster -1	198	1.57506	0.0178738	sp|Q9H3Z4|DNJC5_HUMAN	Q9H3Z4	DNJC5_HUMAN	DNAJC5	DnaJ homolog subfamily C member 5
-0.103405	0.387931	0.915839	0.537631	0.739176	1.04317	-1.95179	-0.648694	-0.919851	+	Cluster -1	725	2.10124	0.00869781	sp|O00418|EF2K_HUMAN	O00418	EF2K_HUMAN	EEF2K	Eukaryotic elongation factor 2 kinase
0.574994	-0.141291	0.38122	0.398814	1.50062	0.449745	-0.205972	-0.992629	-1.9655	+	Cluster -1	106	1.46339	0.0214573	sp|P83881|RL36A_HUMAN	P83881	RL36A_HUMAN	RPL36A	60S ribosomal protein L36a
0.721739	-0.364739	1.42092	0.226339	1.07349	0.0613958	-0.426355	-0.997029	-1.71576	+	Cluster -1	911	1.25896	0.0299644	sp|Q96AV8|E2F7_HUMAN	Q96AV8	E2F7_HUMAN	E2F7	Transcription factor E2F7
0.864752	-0.272515	0.975429	0.497207	1.16254	0.00615822	-0.237257	-1.29506	-1.70125	+	Cluster -1	228	1.38164	0.0244707	sp|Q96AT9|RPE_HUMAN	Q96AT9	RPE_HUMAN	RPE	Ribulose-phosphate 3-epimerase
1.40401	-0.885846	0.693159	0.616833	1.18548	-0.0931247	-0.749479	-1.24464	-0.926397	+	Cluster -1	69	1.00678	0.049323	sp|P10176|COX8A_HUMAN	P10176	COX8A_HUMAN	COX8A	Cytochrome c oxidase subunit 8A, mitochondrial
0.40405	-0.899173	1.45727	0.966671	0.478769	0.598762	-0.682151	-0.833345	-1.49085	+	Cluster -1	1180	1.15934	0.0357272	sp|Q9NQ11|AT132_HUMAN	Q9NQ11	AT132_HUMAN	ATP13A2	Polyamine-transporting ATPase 13A2
0.103114	-1.06589	1.41699	0.857849	0.86239	0.600696	-0.386295	-1.22918	-1.15968	+	Cluster -1	437	1.05181	0.044537	sp|Q5VWJ9|SNX30_HUMAN	Q5VWJ9	SNX30_HUMAN	SNX30	Sorting nexin-30
0.476017	-0.677523	1.15076	0.35687	0.88585	0.904979	-0.2752	-1.72881	-1.09295	+	Cluster -1	1042	1.29317	0.0285384	sp|Q8NB14|UBP38_HUMAN	Q8NB14	UBP38_HUMAN	USP38	Ubiquitin carboxyl-terminal hydrolase 38
0.669993	-0.681039	1.16123	0.756784	0.826697	0.69451	-1.36908	-1.08451	-0.974576	+	Cluster -1	485	1.86493	0.0115338	sp|Q9UKL0|RCOR1_HUMAN	Q9UKL0	RCOR1_HUMAN	RCOR1	REST corepressor 1
0.860426	-0.951573	1.30971	0.774945	0.857174	0.23098	-1.26088	-0.947631	-0.873146	+	Cluster -1	586	1.20098	0.0333804	sp|P36269|GGT5_HUMAN	P36269	GGT5_HUMAN	GGT5	Glutathione hydrolase 5 proenzyme
0.985412	-0.522448	1.10372	0.438763	1.12199	0.297838	-1.29175	-1.22983	-0.903695	+	Cluster -1	574	1.73053	0.0143548	sp|Q8WV41|SNX33_HUMAN	Q8WV41	SNX33_HUMAN	SNX33	Sorting nexin-33
0.115129	-0.813479	1.53894	0.841153	0.898968	0.415646	-1.03766	-1.34896	-0.609735	+	Cluster -1	599	1.18463	0.0343014	sp|P07199|CENPB_HUMAN	P07199	CENPB_HUMAN	CENPB	Major centromere autoantigen B
0.148143	-0.87521	-0.158393	1.31141	1.45703	0.813328	-1.25556	-0.535395	-0.905349	+	Cluster -1	1241	2.65949	0.00433602	sp|P23634|AT2B4_HUMAN	P23634	AT2B4_HUMAN	ATP2B4	Plasma membrane calcium-transporting ATPase 4
-0.0957989	-0.604555	-0.0139473	1.41001	1.30342	0.860415	-1.33665	-0.406777	-1.11611	+	Cluster -1	201	2.92589	0.00346288	sp|Q9H0U4|RAB1B_HUMAN	Q9H0U4	RAB1B_HUMAN	RAB1B	Ras-related protein Rab-1B
-0.0156798	-0.651662	-0.266093	1.3397	1.29069	1.14882	-1.01328	-0.821294	-1.0112	+	Cluster -1	895	4.51939	0	sp|Q14118|DAG1_HUMAN	Q14118	DAG1_HUMAN	DAG1	Dystroglycan
0.355507	-0.458926	0.118018	1.0686	1.46693	0.707605	-1.38142	-1.2431	-0.633213	+	Cluster -1	796	2.76742	0.00406887	sp|Q9H1B7|I2BPL_HUMAN	Q9H1B7	I2BPL_HUMAN	IRF2BPL	Probable E3 ubiquitin-protein ligase IRF2BPL
0.1356	-0.660206	0.116212	1.38626	1.50163	0.530085	-1.18755	-0.958253	-0.863772	+	Cluster -1	758	2.66945	0.00433724	sp|P38435|VKGC_HUMAN	P38435	VKGC_HUMAN	GGCX	Vitamin K-dependent gamma-carboxylase
0.181211	-1.02418	-0.00228467	1.29628	1.36456	0.9223	-0.959899	-0.996616	-0.781372	+	Cluster -1	1233	2.73091	0.00407107	sp|Q14683|SMC1A_HUMAN	Q14683	SMC1A_HUMAN	SMC1A	Structural maintenance of chromosomes protein 1A
0.136631	-1.0719	-0.426822	1.24163	1.61184	0.830372	-0.870997	-0.796144	-0.654614	+	Cluster -1	299	2.63193	0.0044106	sp|Q9C004|SPY4_HUMAN	Q9C004	SPY4_HUMAN	SPRY4	Protein sprouty homolog 4
0.284864	-1.37746	0.119154	1.20744	1.52816	0.564727	-0.596469	-1.01048	-0.719932	+	Cluster -1	583	1.65352	0.0161597	sp|P35241|RADI_HUMAN	P35241	RADI_HUMAN	RDX	Radixin
0.250203	-1.38403	-0.0994372	0.906314	1.7759	0.536887	-0.83606	-1.01562	-0.13416	+	Cluster -1	733	1.40351	0.0236031	sp|Q9UPW6|SATB2_HUMAN	Q9UPW6	SATB2_HUMAN	SATB2	DNA-binding protein SATB2
0.0157142	-1.28589	0.191728	1.28506	1.38706	0.812487	-0.985862	-0.493964	-0.926339	+	Cluster -1	4684	2.06876	0.00901988	sp|Q15149|PLEC_HUMAN	Q15149	PLEC_HUMAN	PLEC	Plectin
-0.461672	-1.15014	0.321442	0.937977	1.73693	0.856272	-0.899336	-0.565435	-0.776039	+	Cluster -1	664	2.0849	0.00892612	sp|P02545|LMNA_HUMAN	P02545	LMNA_HUMAN	LMNA	Prelamin-A/C
0.752352	-0.969165	0.0497155	0.824186	1.25156	0.996712	-1.4804	-0.864535	-0.560429	+	Cluster -1	975	1.78658	0.0130289	sp|Q8WVB6|CTF18_HUMAN	Q8WVB6	CTF18_HUMAN	CHTF18	Chromosome transmission fidelity protein 18 homolog
0.304204	-1.25145	-0.0500134	0.965782	1.44401	0.994533	-1.29853	-0.679254	-0.429281	+	Cluster -1	430	1.89094	0.0111152	sp|P42696|RBM34_HUMAN	P42696	RBM34_HUMAN	RBM34	RNA-binding protein 34
-0.0517967	-0.789789	-0.283246	1.03758	1.14482	1.2156	-1.78864	-0.478745	-0.00578005	+	Cluster -1	1533	1.80161	0.0128151	sp|Q9BVV6|TALD3_HUMAN	Q9BVV6	TALD3_HUMAN	KIAA0586	Protein TALPID3
0.131261	-0.828146	-0.31466	1.2964	1.29773	0.981762	-1.39247	-0.935016	-0.236858	+	Cluster -1	489	2.46669	0.00500796	sp|Q68DY9|ZN772_HUMAN	Q68DY9	ZN772_HUMAN	ZNF772	Zinc finger protein 772
-0.153666	-1.00603	-0.239284	1.25509	1.43852	1.00312	-1.27854	-0.735544	-0.28367	+	Cluster -1	573	2.66769	0.00430698	sp|Q07866|KLC1_HUMAN	Q07866	KLC1_HUMAN	KLC1	Kinesin light chain 1
0.733679	-0.735097	0.00408446	1.1336	1.70123	-0.13778	-0.837123	-1.31059	-0.552003	+	Cluster -1	614	1.21607	0.0325277	sp|Q7Z7F0|KHDC4_HUMAN	Q7Z7F0	KHDC4_HUMAN	KHDC4	KH homology domain-containing protein 4
0.199874	-0.305409	0.469203	1.24378	1.65183	-0.0891199	-1.05812	-1.13712	-0.974922	+	Cluster -1	782	1.81897	0.0124044	sp|P19447|ERCC3_HUMAN	P19447	ERCC3_HUMAN	ERCC3	General transcription and DNA repair factor IIH helicase subunit XPB
1.02599	-1.0069	0.722416	1.26446	0.987941	-0.122359	-1.17218	-0.805886	-0.893478	+	Cluster -1	1565	1.05646	0.0440855	sp|O15061|SYNEM_HUMAN	O15061	SYNEM_HUMAN	SYNM	Synemin
0.411973	-0.824535	0.906782	1.53361	0.827406	0.187571	-1.27877	-1.06265	-0.701387	+	Cluster -1	489	1.43107	0.0225898	sp|Q9BR76|COR1B_HUMAN	Q9BR76	COR1B_HUMAN	CORO1B	Coronin-1B
0.623861	-0.553878	0.396248	1.73217	0.867324	0.0724968	-1.25056	-0.796224	-1.09144	+	Cluster -1	378	1.64412	0.0164937	sp|P51991|ROA3_HUMAN	P51991	ROA3_HUMAN	HNRNPA3	Heterogeneous nuclear ribonucleoprotein A3
0.331386	-0.664262	0.0482324	1.95233	0.924172	0.250572	-0.960015	-0.829949	-1.05247	+	Cluster -1	567	1.79301	0.0129146	sp|Q6NXT6|TAPT1_HUMAN	Q6NXT6	TAPT1_HUMAN	TAPT1	Transmembrane anterior posterior transformation protein 1 homolog
0.130736	-0.632501	-0.0520249	1.98955	0.880206	0.454415	-1.10281	-0.964122	-0.703453	+	Cluster -1	581	2.05205	0.00926116	sp|Q15650|TRIP4_HUMAN	Q15650	TRIP4_HUMAN	TRIP4	Activating signal cointegrator 1
0.853517	-1.32275	0.645087	0.967786	1.03607	0.568497	-1.25065	-0.540228	-0.957335	+	Cluster -1	573	1.16704	0.035288	sp|Q9Y692|GMEB1_HUMAN	Q9Y692	GMEB1_HUMAN	GMEB1	Glucocorticoid modulatory element-binding protein 1
0.931459	-1.52258	0.25806	1.12223	1.14797	0.439395	-0.946691	-0.543466	-0.886374	+	Cluster -1	602	1.02844	0.0468536	sp|Q15326|ZMY11_HUMAN	Q15326	ZMY11_HUMAN	ZMYND11	Zinc finger MYND domain-containing protein 11
0.609376	-0.933231	0.675771	0.768688	1.25041	0.83497	-0.988007	-1.02652	-1.19146	+	Cluster -1	7388	1.93095	0.0106228	sp|Q9UPN3|MACF1_HUMAN	Q9UPN3	MACF1_HUMAN	MACF1	Microtubule-actin cross-linking factor 1, isoforms 1/2/3/5
0.63619	-0.842959	0.264485	0.871814	1.31685	0.952477	-1.02561	-1.08827	-1.08497	+	Cluster -1	394	2.36835	0.00590808	sp|Q92597|NDRG1_HUMAN	Q92597	NDRG1_HUMAN	NDRG1	Protein NDRG1
0.794097	-1.16129	0.171298	0.945257	1.32719	0.751384	-1.17223	-0.711321	-0.944389	+	Cluster -1	2039	1.63912	0.0166141	sp|Q92576|PHF3_HUMAN	Q92576	PHF3_HUMAN	PHF3	PHD finger protein 3
0.631055	-1.05696	0.14007	1.24454	1.27413	0.674971	-1.07898	-0.931598	-0.897231	+	Cluster -1	193	1.9768	0.0100847	sp|P37235|HPCL1_HUMAN	P37235	HPCL1_HUMAN	HPCAL1	Hippocalcin-like protein 1
1.1254	-1.09706	0.0887666	0.88944	1.14682	0.758887	-0.968775	-0.89192	-1.05157	+	Cluster -1	1097	1.48249	0.0207594	sp|Q13127|REST_HUMAN	Q13127	REST_HUMAN	REST	RE1-silencing transcription factor
0.916323	-1.311	-0.0160874	0.952317	1.02954	1.05294	-0.657643	-0.981486	-0.984901	+	Cluster -1	1046	1.47512	0.0208611	sp|Q9UDT6|CLIP2_HUMAN	Q9UDT6	CLIP2_HUMAN	CLIP2	CAP-Gly domain-containing linker protein 2
0.638476	-0.92289	0.54144	1.25026	1.04124	0.614468	-0.97407	-0.896906	-1.29202	+	Cluster -1	362	1.92316	0.0107457	sp|Q9BRK5|CAB45_HUMAN	Q9BRK5	CAB45_HUMAN	SDF4	45 kDa calcium-binding protein
0.814787	-0.687321	0.411577	1.29256	0.805957	0.699421	-0.980426	-0.907226	-1.44933	+	Cluster -1	975	2.11178	0.00862164	sp|Q6ZMZ3|SYNE3_HUMAN	Q6ZMZ3	SYNE3_HUMAN	SYNE3	Nesprin-3
0.17228	-0.935179	0.258066	1.28796	1.07675	1.07745	-1.0486	-0.655561	-1.23316	+	Cluster -1	1631	2.59749	0.00453022	sp|Q86VI3|IQGA3_HUMAN	Q86VI3	IQGA3_HUMAN	IQGAP3	Ras GTPase-activating-like protein IQGAP3
0.529797	-1.01553	0.345268	1.36224	1.07388	0.626628	-1.11758	-0.521704	-1.283	+	Cluster -1	1230	1.79318	0.0129083	sp|Q03112|MECOM_HUMAN	Q03112	MECOM_HUMAN	MECOM	Histone-lysine N-methyltransferase MECOM
0.608833	-1.29666	0.316716	1.17738	1.02462	0.91086	-0.91905	-0.716167	-1.10653	+	Cluster -1	455	1.67114	0.0157338	sp|P07099|HYEP_HUMAN	P07099	HYEP_HUMAN	EPHX1	Epoxide hydrolase 1
0.80784	-1.07705	0.545033	1.16643	0.62327	0.92536	-1.20655	-1.23662	-0.547709	+	Cluster -1	253	1.49699	0.020217	sp|Q9NQY0|BIN3_HUMAN	Q9NQY0	BIN3_HUMAN	BIN3	Bridging integrator 3
1.01118	-0.765532	0.480944	1.44727	0.3227	0.663047	-1.36733	-1.04798	-0.744304	+	Cluster -1	183	1.50345	0.0199149	sp|Q5J8M3|EMC4_HUMAN	Q5J8M3	EMC4_HUMAN	EMC4	ER membrane protein complex subunit 4
0.519738	-1.08172	0.606309	1.15332	0.833181	0.824327	-1.64717	-0.754873	-0.453111	+	Cluster -1	234	1.44028	0.0222394	sp|Q96IU2|ZBED3_HUMAN	Q96IU2	ZBED3_HUMAN	ZBED3	Zinc finger BED domain-containing protein 3
0.571433	-1.29219	0.952203	0.719679	0.784822	1.03178	-1.31868	-0.958833	-0.490217	+	Cluster -1	825	1.15987	0.0357251	sp|Q9P2K2|TXD16_HUMAN	Q9P2K2	TXD16_HUMAN	TXNDC16	Thioredoxin domain-containing protein 16
1.24262	-1.14545	0.655701	0.553203	0.657825	0.867553	-1.16303	-1.32311	-0.345307	+	Cluster -1	124	1.00518	0.0495866	sp|O75380|NDUS6_HUMAN	O75380	NDUS6_HUMAN	NDUFS6	NADH dehydrogenase [ubiquinone] iron-sulfur protein 6, mitochondrial
1.47939	-0.935249	0.447702	0.806989	0.633655	0.539106	-1.4541	-0.506674	-1.01082	+	Cluster -1	414	1.10637	0.039593	sp|Q9NZC7|WWOX_HUMAN	Q9NZC7	WWOX_HUMAN	WWOX	WW domain-containing oxidoreductase
1.27317	-0.918624	0.751209	0.927729	0.701947	0.453792	-1.17908	-0.983588	-1.02656	+	Cluster -1	1806	1.38886	0.0242504	sp|Q9BY89|K1671_HUMAN	Q9BY89	K1671_HUMAN	KIAA1671	Uncharacterized protein KIAA1671
1.27574	-0.794929	0.430249	0.859378	0.949573	0.397746	-1.54446	-1.04553	-0.527768	+	Cluster -1	1522	1.34017	0.0259914	sp|O15085|ARHGB_HUMAN	O15085	ARHGB_HUMAN	ARHGEF11	Rho guanine nucleotide exchange factor 11
0.405783	-0.413759	0.740192	1.37932	0.765749	0.42952	-0.665552	-0.814745	-1.8265	+	Cluster -1	270	1.82798	0.0121498	sp|Q9Y5W9|SNX11_HUMAN	Q9Y5W9	SNX11_HUMAN	SNX11	Sorting nexin-11
-0.0361482	-0.653653	1.05302	1.48998	0.733748	0.321989	-0.814311	-0.437545	-1.65708	+	Cluster -1	208	1.28874	0.0286882	sp|Q8N511|TM199_HUMAN	Q8N511	TM199_HUMAN	TMEM199	Transmembrane protein 199
0.121356	-1.17976	0.609294	1.26208	1.38419	0.393974	-0.855567	-0.467761	-1.26781	+	Cluster -1	1411	1.45749	0.0216753	sp|Q15075|EEA1_HUMAN	Q15075	EEA1_HUMAN	EEA1	Early endosome antigen 1
0.335101	-0.867784	0.466467	1.40082	1.16216	0.283761	-1.15203	-0.154532	-1.47396	+	Cluster -1	250	1.40551	0.023544	sp|P19256|LFA3_HUMAN	P19256	LFA3_HUMAN	CD58	Lymphocyte function-associated antigen 3
0.716925	-1.13498	0.627803	1.02823	1.25281	0.193561	-0.34852	-0.787151	-1.54867	+	Cluster -1	365	1.06144	0.0437092	sp|O15264|MK13_HUMAN	O15264	MK13_HUMAN	MAPK13	Mitogen-activated protein kinase 13
0.478453	-0.750376	0.252087	1.12438	1.47049	0.0934189	-0.31312	-0.530618	-1.82471	+	Cluster -1	277	1.18677	0.0342545	sp|O95229|ZWINT_HUMAN	O95229	ZWINT_HUMAN	ZWINT	ZW10 interactor
-0.67619	-0.346089	0.367122	1.34448	1.24921	0.726416	-0.318544	-0.654484	-1.69191	+	Cluster -1	103	1.93245	0.0106137	sp|Q96FQ6|S10AG_HUMAN	Q96FQ6	S10AG_HUMAN	S100A16	Protein S100-A16
-0.362192	-0.01751	0.674952	0.983109	1.30954	0.56588	-0.432232	-0.850347	-1.8712	+	Cluster -1	476	1.85141	0.0116988	sp|Q96DF8|ESS2_HUMAN	Q96DF8	ESS2_HUMAN	ESS2	Splicing factor ESS-2 homolog
-0.0965448	-0.831307	0.149606	1.81992	1.04053	0.422567	-0.273139	-0.851996	-1.37963	+	Cluster -1	515	1.73388	0.0142971	sp|Q96GM5|SMRD1_HUMAN	Q96GM5	SMRD1_HUMAN	SMARCD1	SWI/SNF-related matrix-associated actin-dependent regulator of chromatin subfamily D member 1
0.0669391	-0.737119	0.315308	1.25979	1.37081	0.645683	-0.601814	-0.70306	-1.61654	+	Cluster -1	601	2.15083	0.00808966	sp|Q56NI9|ESCO2_HUMAN	Q56NI9	ESCO2_HUMAN	ESCO2	N-acetyltransferase ESCO2
0.0163224	-0.946331	0.289504	1.20771	1.48554	0.734143	-0.626386	-0.868385	-1.29212	+	Cluster -1	323	2.30994	0.00644709	sp|Q04828|AK1C1_HUMAN	Q04828	AK1C1_HUMAN	AKR1C1	Aldo-keto reductase family 1 member C1
-0.297542	-1.06201	0.204024	1.39328	1.43581	0.763451	-0.573319	-0.71854	-1.14515	+	Cluster -1	270	2.39463	0.00580898	sp|Q14493|SLBP_HUMAN	Q14493	SLBP_HUMAN	SLBP	Histone RNA hairpin-binding protein
-0.205227	-0.765769	0.161801	1.42201	1.00686	1.22022	-0.662519	-1.01432	-1.16306	+	Cluster -1	1855	3.261	0.00288889	sp|Q9Y4I1|MYO5A_HUMAN	Q9Y4I1	MYO5A_HUMAN	MYO5A	Unconventional myosin-Va
0.0285552	-1.28697	0.608182	0.519166	1.4906	1.09385	-0.513973	-0.704904	-1.23451	+	Cluster -1	1002	1.44353	0.0221618	sp|Q96JQ2|CLMN_HUMAN	Q96JQ2	CLMN_HUMAN	CLMN	Calmin
-0.0704764	-0.999982	0.559744	0.725411	1.46514	0.975955	-0.241413	-1.41157	-1.00281	+	Cluster -1	352	1.67036	0.0157327	sp|Q9ULP0|NDRG4_HUMAN	Q9ULP0	NDRG4_HUMAN	NDRG4	Protein NDRG4
-0.260888	-1.45608	1.20359	1.01159	0.970369	0.781481	-0.491967	-0.883941	-0.87415	+	Cluster -1	507	1.01207	0.048683	sp|Q3KQV9|UAP1L_HUMAN	Q3KQV9	UAP1L_HUMAN	UAP1L1	UDP-N-acetylhexosamine pyrophosphorylase-like protein 1
-0.244559	-1.26884	0.772383	1.47419	0.892263	0.842777	-0.868806	-0.699331	-0.900079	+	Cluster -1	323	1.59428	0.017479	sp|Q9BW85|YJU2_HUMAN	Q9BW85	YJU2_HUMAN	YJU2	Splicing factor YJU2
-0.114415	-1.2241	0.95058	0.989076	1.08327	1.00557	-0.967881	-0.826756	-0.895343	+	Cluster -1	570	1.57955	0.0178212	sp|Q7Z6J6|FRMD5_HUMAN	Q7Z6J6	FRMD5_HUMAN	FRMD5	FERM domain-containing protein 5
-0.00167526	-1.33976	0.552806	1.27454	1.19941	0.835448	-0.839475	-0.739724	-0.941561	+	Cluster -1	214	1.79069	0.0129967	sp|Q9H4E5|RHOJ_HUMAN	Q9H4E5	RHOJ_HUMAN	RHOJ	Rho-related GTP-binding protein RhoJ
0.124603	-1.47827	0.793138	1.05048	1.10413	0.871868	-0.924972	-0.621305	-0.919658	+	Cluster -1	350	1.36077	0.0251146	sp|O75695|XRP2_HUMAN	O75695	XRP2_HUMAN	RP2	Protein XRP2
-0.121622	-1.27058	0.963524	1.19516	0.679984	1.04352	-1.31157	-0.433972	-0.744442	+	Cluster -1	203	1.26385	0.0297104	sp|O14966|RAB7L_HUMAN	O14966	RAB7L_HUMAN	RAB29	Ras-related protein Rab-7L1
0.899	-1.03287	0.0195425	0.875234	1.01459	0.760235	-0.161271	-0.514109	-1.86035	+	Cluster -1	216	1.07283	0.042726	sp|Q9BRX5|PSF3_HUMAN	Q9BRX5	PSF3_HUMAN	GINS3	DNA replication complex GINS protein PSF3
0.892809	-0.893045	-0.40057	1.04117	0.829418	0.958625	0.123723	-0.900564	-1.65156	+	Cluster -1	531	1.14877	0.0363292	sp|Q6P1J9|CDC73_HUMAN	Q6P1J9	CDC73_HUMAN	CDC73	Parafibromin
0.991974	-0.780066	-0.119825	1.22759	0.423449	0.83857	0.226176	-1.33179	-1.47609	+	Cluster -1	279	1.00136	0.0499085	sp|Q9H7J1|PPR3E_HUMAN	Q9H7J1	PPR3E_HUMAN	PPP1R3E	Protein phosphatase 1 regulatory subunit 3E
0.990481	-0.684294	-0.00293454	1.25497	0.572257	0.875645	-0.264136	-1.53295	-1.20905	+	Cluster -1	937	1.50409	0.019901	sp|Q8TEV9|SMCR8_HUMAN	Q8TEV9	SMCR8_HUMAN	SMCR8	Guanine nucleotide exchange protein SMCR8
1.31933	-0.845997	0.0161044	0.778168	0.359281	1.26014	-0.420717	-1.26825	-1.19806	+	Cluster -1	963	1.1834	0.034377	sp|Q13107|UBP4_HUMAN	Q13107	UBP4_HUMAN	USP4	Ubiquitin carboxyl-terminal hydrolase 4
0.916122	-1.28321	0.144616	1.50052	0.291372	0.968175	-0.650736	-0.854533	-1.03232	+	Cluster -1	876	1.15462	0.0359287	sp|Q9H706|GARE1_HUMAN	Q9H706	GARE1_HUMAN	GAREM1	GRB2-associated and regulator of MAPK protein 1
0.775515	-0.713319	0.595171	1.10676	0.547586	0.662914	-0.076468	-1.02141	-1.87675	+	Cluster -1	1393	1.22823	0.0317551	sp|A3KN83|SBNO1_HUMAN	A3KN83	SBNO1_HUMAN	SBNO1	Protein strawberry notch homolog 1
0.820829	-1.03788	0.586855	0.951148	0.599217	0.987413	-0.345313	-0.917771	-1.6445	+	Cluster -1	334	1.28242	0.0290586	sp|Q9NZL9|MAT2B_HUMAN	Q9NZL9	MAT2B_HUMAN	MAT2B	Methionine adenosyltransferase 2 subunit beta
0.645984	-1.24404	0.572425	1.34024	0.684999	0.77395	-0.493499	-1.13498	-1.14508	+	Cluster -1	504	1.35679	0.0252201	sp|Q6P597|KLC3_HUMAN	Q6P597	KLC3_HUMAN	KLC3	Kinesin light chain 3
0.577995	-0.975425	0.402223	1.49297	0.80851	0.59009	-0.43519	-1.0028	-1.45837	+	Cluster -1	394	1.55964	0.0183253	sp|O75521|ECI2_HUMAN	O75521	ECI2_HUMAN	ECI2	Enoyl-CoA delta isomerase 2
0.428244	-0.478562	0.371325	1.13191	1.13141	0.475433	-0.0408596	-1.73725	-1.28166	+	Cluster -1	427	1.59903	0.0173795	sp|P52741|ZN134_HUMAN	P52741	ZN134_HUMAN	ZNF134	Zinc finger protein 134
0.141013	-0.645287	-0.153843	1.07854	1.18846	0.770407	0.486685	-1.54926	-1.31672	+	Cluster -1	81	1.32508	0.0268711	sp|A8MT69|CENPX_HUMAN	A8MT69	CENPX_HUMAN	CENPX	Centromere protein X
-0.388381	-0.580158	-0.610251	1.49285	1.02364	1.28503	-0.139435	-1.14874	-0.934552	+	Cluster -1	558	3.16448	0.00299582	sp|Q9H0G5|NSRP1_HUMAN	Q9H0G5	NSRP1_HUMAN	NSRP1	Nuclear speckle splicing regulatory protein 1
-0.822814	-0.680364	0.282042	1.92242	0.839338	0.716566	-0.418937	-0.949233	-0.889013	+	Cluster -1	495	1.96406	0.0102131	sp|Q9NS91|RAD18_HUMAN	Q9NS91	RAD18_HUMAN	RAD18	E3 ubiquitin-protein ligase RAD18
-0.869544	-0.489793	-0.0321518	1.82624	0.998108	0.714925	-0.197858	-1.30681	-0.643115	+	Cluster -1	230	2.06358	0.00911738	sp|P15374|UCHL3_HUMAN	P15374	UCHL3_HUMAN	UCHL3	Ubiquitin carboxyl-terminal hydrolase isozyme L3
-0.106561	-1.51847	0.0291854	1.65106	0.726615	1.01321	-0.327797	-1.06347	-0.403781	+	Cluster -1	466	1.65602	0.0161282	sp|Q00013|EM55_HUMAN	Q00013	EM55_HUMAN	MPP1	55 kDa erythrocyte membrane protein
0.165355	-1.27326	0.459232	1.61851	0.837014	0.603507	-0.280497	-1.29878	-0.831076	+	Cluster -1	1474	1.36597	0.0250144	sp|O94910|AGRL1_HUMAN	O94910	AGRL1_HUMAN	ADGRL1	Adhesion G protein-coupled receptor L1
-0.186704	-0.783649	0.661115	1.47116	1.06611	0.489336	-0.243348	-1.59338	-0.880636	+	Cluster -1	335	1.54001	0.0188026	sp|P09668|CATH_HUMAN	P09668	CATH_HUMAN	CTSH	Pro-cathepsin H
-0.7233	-1.27886	0.983496	0.632141	1.24666	1.18106	-0.631075	-0.962869	-0.447264	+	Cluster -1	246	1.21668	0.0325322	sp|Q9HCU9|BRMS1_HUMAN	Q9HCU9	BRMS1_HUMAN	BRMS1	Breast cancer metastasis-suppressor 1
-1.01625	-1.24457	0.619329	1.09894	1.21897	1.0945	-0.614515	-0.798395	-0.358012	+	Cluster -1	2069	1.69693	0.0151358	sp|Q9BZ29|DOCK9_HUMAN	Q9BZ29	DOCK9_HUMAN	DOCK9	Dedicator of cytokinesis protein 9
-0.682596	-1.26687	0.833852	1.19475	1.10254	0.952324	-0.830343	-0.920735	-0.382926	+	Cluster -1	289	1.49111	0.0203953	sp|Q13277|STX3_HUMAN	Q13277	STX3_HUMAN	STX3	Syntaxin-3
-1.23567	-0.957213	0.568675	1.54615	0.827991	1.02563	-0.781447	-0.479684	-0.514436	+	Cluster -1	624	1.672	0.0157158	sp|Q9NVW2|RNF12_HUMAN	Q9NVW2	RNF12_HUMAN	RLIM	E3 ubiquitin-protein ligase RLIM
-0.951182	-0.991973	0.741042	1.52534	1.07914	0.650461	-0.762712	-0.987022	-0.30309	+	Cluster -1	1116	1.47336	0.0208995	sp|Q8IUD2|RB6I2_HUMAN	Q8IUD2	RB6I2_HUMAN	ERC1	ELKS/Rab6-interacting/CAST family member 1
-1.30959	-1.0302	0.766476	1.33752	1.11572	0.761857	-0.406718	-0.834164	-0.400899	+	Cluster -1	303	1.35354	0.0253632	sp|P55210|CASP7_HUMAN	P55210	CASP7_HUMAN	CASP7	Caspase-7
-0.952512	-0.918964	0.134536	1.21928	1.43081	1.06737	-0.910429	-0.813913	-0.256187	+	Cluster -1	679	2.60861	0.00451502	sp|Q8WUM9|S20A1_HUMAN	Q8WUM9	S20A1_HUMAN	SLC20A1	Sodium-dependent phosphate transporter 1
-1.29351	-1.09144	-0.0396948	1.23604	1.199	1.23273	-0.37593	-0.690148	-0.177049	+	Cluster -1	552	2.65686	0.00431615	sp|Q92819|HYAS2_HUMAN	Q92819	HYAS2_HUMAN	HAS2	Hyaluronan synthase 2
-0.72234	-1.91616	0.251654	1.06735	1.20108	0.780204	-0.373555	-0.575149	0.286922	+	Cluster -1	377	1.34157	0.025947	sp|Q14344|GNA13_HUMAN	Q14344	GNA13_HUMAN	GNA13	Guanine nucleotide-binding protein subunit alpha-13
-0.598462	-1.60133	0.712352	1.16859	1.33759	0.633138	-0.578715	-0.76436	-0.3088	+	Cluster -1	271	1.24877	0.0305028	sp|P22676|CALB2_HUMAN	P22676	CALB2_HUMAN	CALB2	Calretinin
-0.38203	-1.67191	0.559103	1.08601	1.25784	0.705132	-0.773791	-0.930607	0.15025	+	Cluster -1	2024	1.13365	0.0375064	sp|Q15154|PCM1_HUMAN	Q15154	PCM1_HUMAN	PCM1	Pericentriolar material 1 protein
-0.880544	-1.53123	0.342557	1.42899	1.37058	0.472563	-0.557736	-0.545758	-0.0994264	+	Cluster -1	711	1.5043	0.0199072	sp|O60488|ACSL4_HUMAN	O60488	ACSL4_HUMAN	ACSL4	Long-chain-fatty-acid--CoA ligase 4
-0.555145	-0.761054	0.8651	1.48731	0.400633	0.970082	-0.352718	-0.388254	-1.66595	+	Cluster -1	2286	1.16232	0.0356031	sp|Q07864|DPOE1_HUMAN	Q07864	DPOE1_HUMAN	POLE	DNA polymerase epsilon catalytic subunit A
-0.629339	-1.53961	0.466814	1.76104	0.664532	0.63011	-0.203304	-0.143343	-1.0069	+	Cluster -1	359	1.14933	0.0362897	sp|P50148|GNAQ_HUMAN	P50148	GNAQ_HUMAN	GNAQ	Guanine nucleotide-binding protein G(q) subunit alpha
-0.856121	-1.05606	0.580154	1.78756	0.781038	0.573022	-0.378645	-0.208385	-1.22256	+	Cluster -1	785	1.26619	0.0296362	sp|Q16666|IF16_HUMAN	Q16666	IF16_HUMAN	IFI16	Gamma-interferon-inducible protein 16
-0.630304	-0.648545	0.54059	1.01387	1.37181	0.897825	-1.02473	-0.0645753	-1.45593	+	Cluster -1	178	1.76444	0.0134504	sp|Q03135|CAV1_HUMAN	Q03135	CAV1_HUMAN	CAV1	Caveolin-1
-1.00146	-0.657779	0.625747	1.4188	1.16063	0.543489	-0.76615	0.0646101	-1.38789	+	Cluster -1	97	1.30518	0.0278837	sp|Q9P0B6|CC167_HUMAN	Q9P0B6	CC167_HUMAN	CCDC167	Coiled-coil domain-containing protein 167
-0.654178	-1.13257	0.666454	1.40171	1.28777	0.259493	-1.38995	-0.470853	0.0321272	+	Cluster -1	293	1.05194	0.044515	sp|Q8N6M0|OTU6B_HUMAN	Q8N6M0	OTU6B_HUMAN	OTUD6B	Deubiquitinase OTUD6B
-1.12212	-0.527096	0.535155	1.7365	1.10995	0.345671	-1.14376	-0.28679	-0.647516	+	Cluster -1	393	1.39114	0.0241653	sp|Q7L8J4|3BP5L_HUMAN	Q7L8J4	3BP5L_HUMAN	SH3BP5L	SH3 domain-binding protein 5-like
-0.45762	-1.2303	0.603462	1.62461	0.943049	0.416188	-1.21833	0.156782	-0.837832	+	Cluster -1	558	1.10048	0.0402152	sp|P00367|DHE3_HUMAN	P00367	DHE3_HUMAN	GLUD1	Glutamate dehydrogenase 1, mitochondrial
-0.29671	-1.10826	0.840373	1.76592	0.841222	0.313864	-1.04211	-0.430028	-0.884274	+	Cluster -1	261	1.19433	0.0336778	sp|P30040|ERP29_HUMAN	P30040	ERP29_HUMAN	ERP29	Endoplasmic reticulum resident protein 29
-0.170949	-0.678877	0.769241	0.7753	1.56442	0.612385	-1.48212	-1.10259	-0.286816	+	Cluster -1	384	1.59923	0.0173855	sp|Q96CB9|NSUN4_HUMAN	Q96CB9	NSUN4_HUMAN	NSUN4	5-methylcytosine rRNA methyltransferase NSUN4
-0.489951	-0.610886	0.724461	1.70953	0.882832	0.627829	-0.892112	-0.795011	-1.1567	+	Cluster -1	665	1.94312	0.0106292	sp|Q96B97|SH3K1_HUMAN	Q96B97	SH3K1_HUMAN	SH3KBP1	SH3 domain-containing kinase-binding protein 1
-0.34657	-0.297914	0.352246	1.76228	1.24727	0.1429	-1.30193	-0.974271	-0.584018	+	Cluster -1	541	1.8513	0.0116937	sp|Q9H223|EHD4_HUMAN	Q9H223	EHD4_HUMAN	EHD4	EH domain-containing protein 4
-0.611365	-0.56433	0.828495	1.64144	1.05595	0.275649	-1.32181	-0.915282	-0.388745	+	Cluster -1	829	1.40788	0.0234627	sp|Q5BJF6|ODFP2_HUMAN	Q5BJF6	ODFP2_HUMAN	ODF2	Outer dense fiber protein 2
-0.457909	-0.491216	0.718853	1.17982	1.28183	0.798976	-1.39057	-1.02078	-0.619002	+	Cluster -1	247	2.29208	0.00661919	sp|P61981|1433G_HUMAN	P61981	1433G_HUMAN	YWHAG	14-3-3 protein gamma
-0.54112	-0.565025	0.630985	1.35949	1.3388	0.650902	-0.888374	-1.27997	-0.705689	+	Cluster -1	201	2.24111	0.00708618	sp|P52566|GDIR2_HUMAN	P52566	GDIR2_HUMAN	ARHGDIB	Rho GDP-dissociation inhibitor 2
-0.411604	-0.102852	0.054971	1.42488	1.0501	0.890948	-1.34533	-1.43697	-0.12416	+	Cluster -1	717	2.33058	0.00624279	sp|Q5TAT6|CODA1_HUMAN	Q5TAT6	CODA1_HUMAN	COL13A1	Collagen alpha-1(XIII) chain
-0.398354	-0.488564	-0.202528	1.77802	0.917354	1.02828	-1.20587	-0.830718	-0.597621	+	Cluster -1	390	3.23202	0.00297011	sp|Q96AP7|ESAM_HUMAN	Q96AP7	ESAM_HUMAN	ESAM	Endothelial cell-selective adhesion molecule
-0.124837	0.148177	0.628649	0.994732	1.413	0.258094	-1.39501	-1.56138	-0.361428	+	Cluster -1	874	1.92897	0.0106454	sp|Q8N573|OXR1_HUMAN	Q8N573	OXR1_HUMAN	OXR1	Oxidation resistance protein 1
-0.172854	0.460364	0.832555	0.922651	0.973313	0.5444	-1.41953	-1.64632	-0.494582	+	Cluster -1	102	2.29803	0.00651462	sp|Q86T20|SIM29_HUMAN	Q86T20	SIM29_HUMAN	SMIM29	Small integral membrane protein 29
-0.968729	-0.347582	0.375763	1.65244	0.550934	1.06931	-1.21225	-1.0725	-0.0473733	+	Cluster -1	303	1.61166	0.0171309	sp|Q99685|MGLL_HUMAN	Q99685	MGLL_HUMAN	MGLL	Monoglyceride lipase
-1.16455	0.116704	0.896144	1.35387	0.681503	0.793939	-1.13678	-1.22871	-0.31213	+	Cluster -1	350	1.30683	0.0277997	sp|Q07820|MCL1_HUMAN	Q07820	MCL1_HUMAN	MCL1	Induced myeloid leukemia cell differentiation protein Mcl-1
-1.41432	-0.150567	0.680187	1.18291	0.480402	1.33818	-0.311128	-1.33094	-0.474721	+	Cluster -1	406	1.17663	0.0346446	sp|Q9Y2C2|UST_HUMAN	Q9Y2C2	UST_HUMAN	UST	Uronyl 2-sulfotransferase
-1.03765	-0.0779864	0.966358	0.731767	1.0941	1.04441	-1.44017	-0.275941	-1.00489	+	Cluster -1	542	1.37785	0.0245565	sp|Q8N6G5|CGAT2_HUMAN	Q8N6G5	CGAT2_HUMAN	CSGALNACT2	Chondroitin sulfate N-acetylgalactosaminyltransferase 2
-0.703598	-0.498514	1.17728	0.596085	0.988428	1.25992	-1.29371	-1.00051	-0.525377	+	Cluster -1	3957	1.43815	0.0222687	sp|Q01484|ANK2_HUMAN	Q01484	ANK2_HUMAN	ANK2	Ankyrin-2
-0.741589	0.129516	1.08528	0.632842	1.00557	1.11177	-1.1982	-1.2589	-0.766293	+	Cluster -1	2186	1.84536	0.0118296	sp|Q96BY6|DOC10_HUMAN	Q96BY6	DOC10_HUMAN	DOCK10	Dedicator of cytokinesis protein 10
-1.00541	-0.113322	0.970673	0.767573	1.17864	0.955242	-1.36722	-1.08883	-0.297348	+	Cluster -1	350	1.43488	0.0223829	sp|Q70UQ0|IKIP_HUMAN	Q70UQ0	IKIP_HUMAN	IKBIP	Inhibitor of nuclear factor kappa-B kinase-interacting protein
-1.0421	0.114619	0.320938	0.533712	1.44391	1.36265	-1.04303	-1.00996	-0.680734	+	Cluster -1	1894	2.04336	0.00930022	sp|O75051|PLXA2_HUMAN	O75051	PLXA2_HUMAN	PLXNA2	Plexin-A2
-1.02621	0.111618	0.587309	0.961618	1.38011	0.887862	-1.27799	-0.910428	-0.713888	+	Cluster -1	594	2.03354	0.00940842	sp|Q13322|GRB10_HUMAN	Q13322	GRB10_HUMAN	GRB10	Growth factor receptor-bound protein 10
-0.632599	0.197824	0.748325	0.89882	1.34191	0.770919	-1.35811	-1.08002	-0.887069	+	Cluster -1	558	2.40997	0.00568053	sp|O00592|PODXL_HUMAN	O00592	PODXL_HUMAN	PODXL	Podocalyxin
-0.482165	-0.657677	0.0745512	0.611669	1.76163	1.07389	-1.48256	-0.669134	-0.230206	+	Cluster -1	381	1.96569	0.0101954	sp|Q7Z6M4|MTEF4_HUMAN	Q7Z6M4	MTEF4_HUMAN	MTERF4	Transcription termination factor 4, mitochondrial
-0.7461	-0.730592	-0.0799454	0.721099	1.62552	1.41064	-1.0352	-0.5716	-0.593814	+	Cluster -1	350	2.88712	0.00349621	sp|P13995|MTDC_HUMAN	P13995	MTDC_HUMAN	MTHFD2	Bifunctional methylenetetrahydrofolate dehydrogenase/cyclohydrolase, mitochondrial
-0.78942	-0.12828	-0.424648	0.770573	1.91866	0.871889	-1.28817	-0.627176	-0.303426	+	Cluster -1	446	2.15419	0.0080175	sp|Q5T3I0|GPTC4_HUMAN	Q5T3I0	GPTC4_HUMAN	GPATCH4	G patch domain-containing protein 4
-0.831666	-0.524059	0.101865	1.35033	1.32275	0.970915	-1.42274	-0.571628	-0.395765	+	Cluster -1	1130	2.53233	0.00454106	sp|P23229|ITA6_HUMAN	P23229	ITA6_HUMAN	ITGA6	Integrin alpha-6
-0.688817	-0.261792	0.461856	0.920303	1.22918	1.15454	-1.69735	-0.712282	-0.405643	+	Cluster -1	358	2.06506	0.00907797	sp|P13747|HLAE_HUMAN	P13747	HLAE_HUMAN	HLA-E	HLA class I histocompatibility antigen, alpha chain E
-0.669875	0.293069	-0.498228	0.812102	1.44518	1.35914	-1.09294	-1.00948	-0.638959	+	Cluster -1	295	2.8755	0.00350374	sp|Q6UWI4|SHSA2_HUMAN	Q6UWI4	SHSA2_HUMAN	SHISA2	Protein shisa-2 homolog
-0.568967	-0.224603	-0.248663	1.21398	1.22578	1.32729	-1.15223	-1.14815	-0.424428	+	Cluster -1	427	3.80027	0.0016699	sp|Q9Y606|TRUA_HUMAN	Q9Y606	TRUA_HUMAN	PUS1	tRNA pseudouridine synthase A
-0.737826	-0.400449	-0.559152	1.30422	1.45976	1.19002	-0.885841	-0.757588	-0.613135	+	Cluster -1	928	5.35874	0	sp|Q9BZQ8|NIBA1_HUMAN	Q9BZQ8	NIBA1_HUMAN	NIBAN1	Protein Niban 1
-0.995946	-0.368002	-0.213518	1.06641	1.65909	0.982408	-0.762209	-1.16115	-0.207083	+	Cluster -1	403	2.61538	0.00445455	sp|O76054|S14L2_HUMAN	O76054	S14L2_HUMAN	SEC14L2	SEC14-like protein 2
-0.928677	-0.214748	-0.261748	0.340468	1.77588	1.46759	-0.647735	-0.828285	-0.70274	+	Cluster -1	451	2.20027	0.00736828	sp|O00458|IFRD1_HUMAN	O00458	IFRD1_HUMAN	IFRD1	Interferon-related developmental regulator 1
-0.00475295	-0.562457	-0.435424	1.01569	1.52986	0.890701	-0.676827	-1.69305	-0.0637372	+	Cluster -1	76	1.97658	0.0100897	sp|Q9Y5V0|ZN706_HUMAN	Q9Y5V0	ZN706_HUMAN	ZNF706	Zinc finger protein 706
-0.0589779	-0.972706	-0.336791	1.49044	0.870477	0.700302	-0.703693	-1.60877	0.619717	+	Cluster -1	123	1.15494	0.0359037	sp|Q86TS9|RM52_HUMAN	Q86TS9	RM52_HUMAN	MRPL52	39S ribosomal protein L52, mitochondrial
0.421846	-1.35436	-0.312231	1.19183	0.664054	1.20429	-0.963913	-1.2279	0.376389	+	Cluster -1	473	1.16826	0.0352237	sp|Q86WP2|GPBP1_HUMAN	Q86WP2	GPBP1_HUMAN	GPBP1	Vasculin
-0.129865	-1.29487	0.377609	0.589126	0.819858	1.5432	-1.35603	-0.896461	0.347428	+	Cluster -1	73	1.06978	0.0429965	sp|P61952|GBG11_HUMAN	P61952	GBG11_HUMAN	GNG11	Guanine nucleotide-binding protein G(I)/G(S)/G(O) subunit gamma-11
0.273415	-1.38856	0.456621	0.608174	1.04428	1.27735	-1.14312	-1.17789	0.0497188	+	Cluster -1	538	1.16379	0.035502	sp|P52294|IMA5_HUMAN	P52294	IMA5_HUMAN	KPNA1	Importin subunit alpha-5
0.402814	-1.21387	0.375178	0.90655	0.970684	0.968822	-1.35021	-1.28363	0.223671	+	Cluster -1	1096	1.15359	0.0359713	sp|Q9NX05|F120C_HUMAN	Q9NX05	F120C_HUMAN	FAM120C	Constitutive coactivator of PPAR-gamma-like protein 2
0.0515872	-1.60732	0.627283	1.00537	0.726049	1.16987	-0.991238	-1.06068	0.079087	+	Cluster -1	1571	1.03694	0.0460753	sp|Q14689|DIP2A_HUMAN	Q14689	DIP2A_HUMAN	DIP2A	Disco-interacting protein 2 homolog A
-1.78283	-0.0325302	-0.0660359	1.60323	1.19077	0.31386	-0.173202	-0.795532	-0.257738	+	Cluster -1	337	1.23556	0.0313113	sp|P37837|TALDO_HUMAN	P37837	TALDO_HUMAN	TALDO1	Transaldolase
-1.35182	-0.516119	0.204435	1.50399	1.5188	-0.00873272	-0.94337	-0.605307	0.198131	+	Cluster -1	550	1.09906	0.0403248	sp|Q14247|SRC8_HUMAN	Q14247	SRC8_HUMAN	CTTN	Src substrate cortactin
-1.25016	-0.962513	-0.716888	1.63307	0.929908	0.759374	-0.432332	-0.572154	0.611703	+	Cluster -1	504	2.26303	0.00686357	sp|P61011|SRP54_HUMAN	P61011	SRP54_HUMAN	SRP54	Signal recognition particle 54 kDa protein
-1.15	-0.561003	-0.525139	2.06632	0.381805	0.854909	-0.461124	-0.824701	0.218929	+	Cluster -1	395	1.61442	0.0170716	sp|Q9BSW2|EFC4B_HUMAN	Q9BSW2	EFC4B_HUMAN	CRACR2A	EF-hand calcium-binding domain-containing protein 4B
-1.09869	-0.613881	-0.686213	1.96232	0.455902	0.516503	-0.808869	-0.544828	0.817755	+	Cluster -1	206	1.22875	0.0317282	sp|O43399|TPD54_HUMAN	O43399	TPD54_HUMAN	TPD52L2	Tumor protein D54
-0.541337	0.390352	-0.998536	1.49569	0.857835	1.20428	-0.50248	-1.13411	-0.7717	+	Cluster -1	557	2.26449	0.00688779	sp|Q13123|RED_HUMAN	Q13123	RED_HUMAN	IK	Protein Red
-0.531447	1.00016	-1.03273	1.31656	1.0059	0.715884	-0.349703	-1.14517	-0.97946	+	Cluster -1	1502	1.37901	0.0245248	sp|Q13017|RHG05_HUMAN	Q13017	RHG05_HUMAN	ARHGAP5	Rho GTPase-activating protein 5
-0.564383	1.05937	-0.780514	1.4579	0.944384	0.502184	-0.360578	-1.11534	-1.14302	+	Cluster -1	734	1.33355	0.0264166	sp|P33992|MCM5_HUMAN	P33992	MCM5_HUMAN	MCM5	DNA replication licensing factor MCM5
-0.301975	0.63591	-0.727591	1.1923	0.965014	0.641776	0.228337	-0.729607	-1.90417	+	Cluster -1	185	1.11178	0.0391941	sp|Q96IK1|BOD1_HUMAN	Q96IK1	BOD1_HUMAN	BOD1	Biorientation of chromosomes in cell division protein 1
0.347582	0.0709466	-1.17972	0.572197	1.44561	0.90876	0.219991	-1.6086	-0.776769	+	Cluster -1	581	1.11907	0.038511	sp|Q8IZM8|ZN654_HUMAN	Q8IZM8	ZN654_HUMAN	ZNF654	Zinc finger protein 654
-0.113481	0.437229	-1.13739	0.269398	1.84059	0.8429	-0.458304	-1.43572	-0.245228	+	Cluster -1	376	1.13517	0.0373896	sp|O75554|WBP4_HUMAN	O75554	WBP4_HUMAN	WBP4	WW domain-binding protein 4
0.45846	0.792806	-0.914631	0.289375	0.92154	1.49366	-0.789981	-1.08921	-1.16202	+	Cluster -1	624	1.54657	0.0185861	sp|Q9H981|ARP8_HUMAN	Q9H981	ARP8_HUMAN	ACTR8	Actin-related protein 8
0.209857	0.890606	-0.732105	0.581296	1.21803	1.06363	-0.73142	-1.16547	-1.33442	+	Cluster -1	2472	1.98603	0.00995363	sp|Q5UIP0|RIF1_HUMAN	Q5UIP0	RIF1_HUMAN	RIF1	Telomere-associated protein RIF1
0.0276573	0.751716	-0.53945	0.566858	1.36254	1.03168	-0.504958	-1.27182	-1.42423	+	Cluster -1	599	2.06263	0.00911838	sp|Q9UJX3|APC7_HUMAN	Q9UJX3	APC7_HUMAN	ANAPC7	Anaphase-promoting complex subunit 7
0.205591	-0.109659	-0.696579	0.477663	1.46416	1.52889	-0.949875	-1.0112	-0.908994	+	Cluster -1	721	2.56313	0.00445065	sp|Q9Y608|LRRF2_HUMAN	Q9Y608	LRRF2_HUMAN	LRRFIP2	Leucine-rich repeat flightless-interacting protein 2
0.611543	0.0415622	-1.14826	0.605687	1.43919	1.1695	-0.806304	-1.05691	-0.856005	+	Cluster -1	111	1.80002	0.0128231	sp|P06454|PTMA_HUMAN	P06454	PTMA_HUMAN	PTMA	Prothymosin alpha
0.247358	-0.00836395	-0.698774	0.766272	1.25091	1.3725	-0.45527	-1.50713	-0.967501	+	Cluster -1	223	2.43098	0.00533447	sp|O00233|PSMD9_HUMAN	O00233	PSMD9_HUMAN	PSMD9	26S proteasome non-ATPase regulatory subunit 9
-0.230208	0.109345	-0.189228	0.855472	1.29966	1.23557	-0.302988	-1.42242	-1.35521	+	Cluster -1	473	2.74591	0.00409302	sp|Q16566|KCC4_HUMAN	Q16566	KCC4_HUMAN	CAMK4	Calcium/calmodulin-dependent protein kinase type IV
-0.272972	0.301266	-0.0500508	1.01124	1.59737	0.697533	-0.758861	-1.20612	-1.31942	+	Cluster -1	209	3.06589	0.00295749	sp|Q9NZD2|GLTP_HUMAN	Q9NZD2	GLTP_HUMAN	GLTP	Glycolipid transfer protein
-0.2158	0.311524	-0.287443	1.17786	1.28215	1.02522	-0.969655	-1.32168	-1.00217	+	Cluster -1	501	4.18137	0.000193548	sp|Q8NCL9|APCDL_HUMAN	Q8NCL9	APCDL_HUMAN	APCDD1L	Protein APCDD1-like
-0.0194463	-0.147403	-0.896285	1.98072	1.04828	0.142994	-0.705838	-0.131627	-1.27139	+	Cluster -1	755	1.37387	0.0247171	sp|Q96HI0|SENP5_HUMAN	Q96HI0	SENP5_HUMAN	SENP5	Sentrin-specific protease 5
-0.666611	0.262023	-0.42149	1.78745	1.048	0.246612	-1.49544	0.0832167	-0.843771	+	Cluster -1	306	1.31775	0.0272395	sp|Q9BRJ2|RM45_HUMAN	Q9BRJ2	RM45_HUMAN	MRPL45	39S ribosomal protein L45, mitochondrial
-0.00207312	0.500838	-1.03	1.83696	0.92742	0.237072	-1.27079	-0.777617	-0.421821	+	Cluster -1	1220	1.33607	0.026222	sp|O60841|IF2P_HUMAN	O60841	IF2P_HUMAN	EIF5B	Eukaryotic translation initiation factor 5B
0.123002	0.644996	-1.03391	1.7581	0.914163	0.165954	-1.30418	-0.49132	-0.776815	+	Cluster -1	627	1.24122	0.0309295	sp|Q9UHB9|SRP68_HUMAN	Q9UHB9	SRP68_HUMAN	SRP68	Signal recognition particle subunit SRP68
-0.688318	0.0457996	0.400053	1.45275	1.47735	-0.208479	-0.948149	-0.0739167	-1.45709	+	Cluster -1	272	1.09107	0.0411649	sp|Q96ND0|F210A_HUMAN	Q96ND0	F210A_HUMAN	FAM210A	Protein FAM210A
-0.527601	0.325451	0.495752	1.3191	1.3326	-0.0272033	-1.59452	-0.195458	-1.12812	+	Cluster -1	508	1.35077	0.0255322	sp|Q8WXA9|SREK1_HUMAN	Q8WXA9	SREK1_HUMAN	SREK1	Splicing regulatory glutamine/lysine-rich protein 1
0.304508	0.202547	0.0862586	1.69214	1.07916	-0.455776	-1.4077	-0.243201	-1.25793	+	Cluster -1	114	1.16363	0.0354846	sp|Q96I23|PREY_HUMAN	Q96I23	PREY_HUMAN	PYURF	Protein preY, mitochondrial
-0.63592	0.815203	0.214405	1.15498	0.927188	0.554319	-1.20752	-0.116019	-1.70663	+	Cluster -1	1208	1.47913	0.0208091	sp|O94761|RECQ4_HUMAN	O94761	RECQ4_HUMAN	RECQL4	ATP-dependent DNA helicase Q4
-0.638339	1.27748	0.0424652	1.45342	0.880309	-0.170077	-1.0902	-0.481425	-1.27364	+	Cluster -1	1697	1.04538	0.0451651	sp|Q9NZM3|ITSN2_HUMAN	Q9NZM3	ITSN2_HUMAN	ITSN2	Intersectin-2
0.100157	-0.360454	-0.492008	1.1672	1.471	0.754086	-0.306456	-0.572381	-1.76114	+	Cluster -1	729	2.05498	0.00923852	sp|Q96S59|RANB9_HUMAN	Q96S59	RANB9_HUMAN	RANBP9	Ran-binding protein 9
0.268588	0.142383	-0.608927	1.44234	1.22886	0.501976	-0.671893	-0.608401	-1.69493	+	Cluster -1	380	2.03339	0.00940328	sp|P39748|FEN1_HUMAN	P39748	FEN1_HUMAN	FEN1	Flap endonuclease 1
0.274874	-0.202681	0.0761125	1.21587	1.07776	0.794402	-1.21977	-0.271566	-1.74499	+	Cluster -1	145	2.34484	0.0061251	sp|Q15388|TOM20_HUMAN	Q15388	TOM20_HUMAN	TOMM20	Mitochondrial import receptor subunit TOM20 homolog
-0.243035	0.179827	-0.169492	1.41767	1.27754	0.375431	-0.93732	-0.109988	-1.79063	+	Cluster -1	268	1.70931	0.0148839	sp|Q7L2Z9|CENPQ_HUMAN	Q7L2Z9	CENPQ_HUMAN	CENPQ	Centromere protein Q
-0.0518652	-0.0419169	0.120148	1.37088	1.35612	0.258883	-1.30669	-0.133803	-1.57175	+	Cluster -1	474	1.80396	0.012802	sp|Q9ULV4|COR1C_HUMAN	Q9ULV4	COR1C_HUMAN	CORO1C	Coronin-1C
0.450654	0.363281	-0.110992	1.54991	1.09905	-0.0652251	-0.885548	-0.769668	-1.63146	+	Cluster -1	917	1.80012	0.0128285	sp|Q92636|FAN_HUMAN	Q92636	FAN_HUMAN	NSMAF	Protein FAN
0.482997	0.149775	0.134739	1.09422	1.25375	0.157216	-0.87557	-0.39468	-2.00245	+	Cluster -1	292	1.71714	0.0147027	sp|Q15072|OZF_HUMAN	Q15072	OZF_HUMAN	ZNF146	Zinc finger protein OZF
0.117028	-0.547949	-0.129929	1.46175	1.23467	0.183694	-1.27795	0.427763	-1.46907	+	Cluster -1	2406	1.13914	0.0370139	sp|Q5T1R4|ZEP3_HUMAN	Q5T1R4	ZEP3_HUMAN	HIVEP3	Transcription factor HIVEP3
-0.431775	-0.664426	-0.15129	1.61561	1.41387	0.443521	-1.05746	0.0254444	-1.19349	+	Cluster -1	324	1.93643	0.0106315	sp|Q9Y673|ALG5_HUMAN	Q9Y673	ALG5_HUMAN	ALG5	Dolichyl-phosphate beta-glucosyltransferase
-0.258962	-0.660588	-0.139289	1.39566	1.81891	0.154627	-0.994919	-0.244266	-1.07118	+	Cluster -1	440	1.76565	0.0134195	sp|Q15084|PDIA6_HUMAN	Q15084	PDIA6_HUMAN	PDIA6	Protein disulfide-isomerase A6
-0.705893	-0.151194	-0.0784689	1.01637	1.91028	0.501646	-1.103	-0.272653	-1.1171	+	Cluster -1	336	2.00327	0.00969805	sp|Q9NWR8|MCUB_HUMAN	Q9NWR8	MCUB_HUMAN	MCUB	Calcium uniporter regulatory subunit MCUb, mitochondrial
-1.00557	-0.214447	-0.269461	1.18625	1.81601	0.639453	-0.656196	-0.426659	-1.06939	+	Cluster -1	541	2.37173	0.00594104	sp|Q6DD88|ATLA3_HUMAN	Q6DD88	ATLA3_HUMAN	ATL3	Atlastin-3
-0.234069	-0.147406	-0.474132	1.04914	1.59194	1.04339	-0.84177	-0.611289	-1.3758	+	Cluster -1	559	3.45678	0.00298471	sp|Q13112|CAF1B_HUMAN	Q13112	CAF1B_HUMAN	CHAF1B	Chromatin assembly factor 1 subunit B
-0.457883	-0.465215	-0.556118	1.12747	1.63624	1.02248	-1.23689	-0.244984	-0.825105	+	Cluster -1	475	3.14058	0.00293548	sp|O75844|FACE1_HUMAN	O75844	FACE1_HUMAN	ZMPSTE24	CAAX prenyl protease 1 homolog
0.0316433	1.45263	-0.437267	-0.026558	0.941889	0.954188	-1.44221	-0.13196	-1.34236	+	Cluster -1	491	1.02805	0.0468668	sp|Q8NBI5|S43A3_HUMAN	Q8NBI5	S43A3_HUMAN	SLC43A3	Solute carrier family 43 member 3
-0.564337	0.706722	0.149475	0.158307	1.3432	1.22443	-0.805241	-0.500004	-1.71255	+	Cluster -1	373	1.537	0.0188494	sp|Q9BRQ8|FSP1_HUMAN	Q9BRQ8	FSP1_HUMAN	AIFM2	Ferroptosis suppressor protein 1
-0.0404975	0.90304	0.641721	-0.111478	1.53933	0.165781	-1.49321	-0.152557	-1.45213	+	Cluster -1	417	1.19374	0.033724	sp|O43820|HYAL3_HUMAN	O43820	HYAL3_HUMAN	HYAL3	Hyaluronidase-3
-1.24634	0.564102	-0.231338	1.43539	0.946888	0.898881	-1.26525	-0.325832	-0.776497	+	Cluster -1	241	1.64427	0.0165175	sp|Q9UHQ4|BAP29_HUMAN	Q9UHQ4	BAP29_HUMAN	BCAP29	B-cell receptor-associated protein 29
-1.12048	0.477937	-0.238904	1.11068	1.28969	1.03038	-1.32152	-0.625644	-0.602143	+	Cluster -1	373	2.05576	0.00925407	sp|Q9H6B4|CLMP_HUMAN	Q9H6B4	CLMP_HUMAN	CLMP	CXADR-like membrane protein
-1.45478	0.435024	0.0553328	0.531439	1.6272	0.956407	-1.14761	-0.386672	-0.616338	+	Cluster -1	192	1.31591	0.0272893	sp|Q96GF1|RN185_HUMAN	Q96GF1	RN185_HUMAN	RNF185	E3 ubiquitin-protein ligase RNF185
-1.24547	0.872098	0.374377	0.693096	1.21648	0.822056	-1.34312	-0.427583	-0.961929	+	Cluster -1	244	1.26768	0.0295939	sp|Q9BZM4|ULBP3_HUMAN	Q9BZM4	ULBP3_HUMAN	ULBP3	UL16-binding protein 3
-1.48254	1.00264	0.128757	0.942034	1.06911	0.709239	-1.17482	-0.320415	-0.874006	+	Cluster -1	431	1.0328	0.0464882	sp|P00749|UROK_HUMAN	P00749	UROK_HUMAN	PLAU	Urokinase-type plasminogen activator
-1.2863	0.447877	-0.0133516	1.52841	1.23919	0.492704	-0.807941	-0.580545	-1.02004	+	Cluster -1	915	1.63472	0.0167369	sp|Q6ZXV5|TMTC3_HUMAN	Q6ZXV5	TMTC3_HUMAN	TMTC3	Protein O-mannosyl-transferase TMTC3
-1.30051	0.528636	0.417196	1.55266	0.952078	0.313568	-0.670574	-0.459235	-1.33382	+	Cluster -1	1023	1.15875	0.0357145	sp|Q02218|ODO1_HUMAN	Q02218	ODO1_HUMAN	OGDH	2-oxoglutarate dehydrogenase, mitochondrial
-1.34731	-0.13406	0.871389	1.56035	0.938464	0.401233	-0.606087	-0.571974	-1.11201	+	Cluster -1	348	1.14413	0.036602	sp|O43681|GET3_HUMAN	O43681	GET3_HUMAN	GET3	ATPase GET3
-1.37214	0.07214	0.871258	1.3951	0.851497	0.598654	-0.981527	-0.311149	-1.12383	+	Cluster -1	379	1.1562	0.035798	sp|Q86WV6|STING_HUMAN	Q86WV6	STING_HUMAN	STING1	Stimulator of interferon genes protein
-1.50667	0.256691	0.839565	1.08834	0.971607	0.844928	-0.9455	-0.666844	-0.882115	+	Cluster -1	738	1.25339	0.0303049	sp|O60568|PLOD3_HUMAN	O60568	PLOD3_HUMAN	PLOD3	Multifunctional procollagen lysine hydroxylase and glycosyltransferase LH3
-0.806935	1.4775	-0.473682	0.357342	0.966667	1.19219	-0.949631	-0.90771	-0.85574	+	Cluster -1	683	1.10603	0.0396316	sp|O94929|ABLM3_HUMAN	O94929	ABLM3_HUMAN	ABLIM3	Actin-binding LIM protein 3
-1.14204	1.2961	0.255653	0.684135	0.895559	0.878735	-1.02694	-1.20226	-0.638933	+	Cluster -1	698	1.19898	0.0334711	sp|Q6ZRP7|QSOX2_HUMAN	Q6ZRP7	QSOX2_HUMAN	QSOX2	Sulfhydryl oxidase 2
-0.833977	1.28455	0.222853	1.09241	0.534192	0.842273	-1.32399	-0.981608	-0.83671	+	Cluster -1	468	1.50214	0.0199837	sp|Q96HE7|ERO1A_HUMAN	Q96HE7	ERO1A_HUMAN	ERO1A	ERO1-like protein alpha
-0.895881	1.5215	0.514112	0.720839	0.516356	0.726323	-1.17697	-1.14177	-0.784507	+	Cluster -1	738	1.24708	0.030589	sp|P08582|TRFM_HUMAN	P08582	TRFM_HUMAN	MELTF	Melanotransferrin
-0.0984388	0.705742	0.0529968	0.517659	1.21808	1.09693	-1.47142	-0.606993	-1.41456	+	Cluster -1	492	2.56972	0.00444085	sp|Q15043|S39AE_HUMAN	Q15043	S39AE_HUMAN	SLC39A14	Metal cation symporter ZIP14
-0.271079	0.8849	-0.0137614	0.878417	1.00276	1.04967	-1.32605	-0.908491	-1.29636	+	Cluster -1	978	2.90438	0.0034613	sp|Q6UB35|C1TM_HUMAN	Q6UB35	C1TM_HUMAN	MTHFD1L	Monofunctional C1-tetrahydrofolate synthase, mitochondrial
-0.542624	1.25258	-0.544824	1.1941	1.05083	0.56455	-1.1137	-1.02815	-0.832766	+	Cluster -1	583	1.56301	0.0182104	sp|Q8NHH9|ATLA2_HUMAN	Q8NHH9	ATLA2_HUMAN	ATL2	Atlastin-2
-0.228135	0.964097	-0.310019	0.941639	1.29762	0.689677	-0.968858	-0.979767	-1.40626	+	Cluster -1	1068	2.33947	0.00616539	sp|P28749|RBL1_HUMAN	P28749	RBL1_HUMAN	RBL1	Retinoblastoma-like protein 1
-0.393521	1.08795	-0.194769	1.12601	0.995495	0.746816	-1.21535	-0.995783	-1.15685	+	Cluster -1	760	2.27715	0.00677691	sp|Q9UGP8|SEC63_HUMAN	Q9UGP8	SEC63_HUMAN	SEC63	Translocation protein SEC63 homolog
-0.502186	1.12008	-0.381634	1.01963	1.11839	0.803387	-1.01774	-0.932919	-1.22702	+	Cluster -1	979	1.99396	0.00983107	sp|Q86T82|UBP37_HUMAN	Q86T82	UBP37_HUMAN	USP37	Ubiquitin carboxyl-terminal hydrolase 37
-0.0487829	1.24207	-0.483762	0.889139	0.931189	0.858034	-1.14682	-1.13732	-1.10375	+	Cluster -1	469	2.08471	0.00893023	sp|P03956|MMP1_HUMAN	P03956	MMP1_HUMAN	MMP1	Interstitial collagenase
-0.996699	0.791653	-0.070761	1.22808	1.17358	0.790923	-0.845695	-0.990877	-1.0802	+	Cluster -1	792	1.98666	0.00996904	sp|P23921|RIR1_HUMAN	P23921	RIR1_HUMAN	RRM1	Ribonucleoside-diphosphate reductase large subunit
-0.492964	0.700038	0.00420746	1.30454	1.13653	0.697599	-1.14803	-0.951651	-1.25026	+	Cluster -1	562	2.76153	0.00406299	sp|P00750|TPA_HUMAN	P00750	TPA_HUMAN	PLAT	Tissue-type plasminogen activator
-0.0139525	1.08539	0.865137	0.819481	0.52676	0.357512	-1.8192	-1.03038	-0.790747	+	Cluster -1	153	2.30388	0.00646018	sp|Q8N138|ORML3_HUMAN	Q8N138	ORML3_HUMAN	ORMDL3	ORM1-like protein 3
0.0840943	1.11412	0.508822	1.1954	0.333108	0.430028	-1.62492	-1.17097	-0.869682	+	Cluster -1	360	2.39659	0.0057541	sp|P82650|RT22_HUMAN	P82650	RT22_HUMAN	MRPS22	28S ribosomal protein S22, mitochondrial
-0.651443	0.998441	0.972958	0.906044	0.7479	0.488182	-1.23042	-1.18442	-1.04724	+	Cluster -1	5795	1.8769	0.0113644	sp|Q8IVF2|AHNK2_HUMAN	Q8IVF2	AHNK2_HUMAN	AHNAK2	Protein AHNAK2
-0.59374	0.694418	0.947263	1.02661	0.783439	0.648569	-1.22426	-1.33655	-0.945745	+	Cluster -1	984	2.16342	0.00794181	sp|P08235|MCR_HUMAN	P08235	MCR_HUMAN	NR3C2	Mineralocorticoid receptor
-0.523021	0.398612	0.804976	1.23068	0.962314	0.627113	-1.17404	-1.18198	-1.14466	+	Cluster -1	289	2.57365	0.00446673	sp|P46926|GNPI1_HUMAN	P46926	GNPI1_HUMAN	GNPDA1	Glucosamine-6-phosphate isomerase 1
-0.124885	1.1439	0.560641	0.706706	0.977055	0.445427	-1.40283	-1.35587	-0.950152	+	Cluster -1	1028	2.61882	0.00447878	sp|Q8IVF7|FMNL3_HUMAN	Q8IVF7	FMNL3_HUMAN	FMNL3	Formin-like protein 3
-0.116817	1.39469	0.318626	0.917047	0.690185	0.433085	-1.08121	-1.28819	-1.26741	+	Cluster -1	471	2.31445	0.00645993	sp|Q8NB16|MLKL_HUMAN	Q8NB16	MLKL_HUMAN	MLKL	Mixed lineage kinase domain-like protein
-0.191781	1.29449	0.24437	0.603182	0.910391	0.77432	-1.30362	-1.0693	-1.26205	+	Cluster -1	574	2.42274	0.00558037	sp|P21589|5NTD_HUMAN	P21589	5NTD_HUMAN	NT5E	5'-nucleotidase
-0.139072	1.31096	0.171048	0.739317	0.731414	0.838124	-1.23796	-1.24514	-1.16869	+	Cluster -1	617	2.49727	0.00498696	sp|O94923|GLCE_HUMAN	O94923	GLCE_HUMAN	GLCE	D-glucuronyl C5-epimerase
-0.319668	1.06048	0.554229	0.319334	1.32641	0.599801	-1.04009	-1.11435	-1.38614	+	Cluster -1	495	2.112	0.00860287	sp|Q6ZNC8|MBOA1_HUMAN	Q6ZNC8	MBOA1_HUMAN	MBOAT1	Lysophospholipid acyltransferase 1
-0.25198	0.883194	0.699562	0.504644	1.2687	0.563246	-1.19579	-1.26122	-1.21036	+	Cluster -1	689	2.57732	0.00446138	sp|Q5JTW2|CEP78_HUMAN	Q5JTW2	CEP78_HUMAN	CEP78	Centrosomal protein of 78 kDa
-0.192825	0.771347	0.425176	0.631508	1.16277	0.90561	-1.10746	-1.39735	-1.19877	+	Cluster -1	522	3.24624	0.00293587	sp|Q16222|UAP1_HUMAN	Q16222	UAP1_HUMAN	UAP1	UDP-N-acetylhexosamine pyrophosphorylase
-0.226188	0.966906	0.311048	1.01546	1.07227	0.446951	-1.00597	-0.977924	-1.60256	+	Cluster -1	1239	2.46935	0.00496099	sp|O95819|M4K4_HUMAN	O95819	M4K4_HUMAN	MAP4K4	Mitogen-activated protein kinase kinase kinase kinase 4
-0.53646	1.09418	0.627409	0.889285	0.860485	0.613328	-1.25721	-1.07869	-1.21233	+	Cluster -1	2671	2.20399	0.00732105	sp|Q14573|ITPR3_HUMAN	Q14573	ITPR3_HUMAN	ITPR3	Inositol 1,4,5-trisphosphate receptor type 3
-0.144788	0.92134	0.525132	0.918434	0.897305	0.649308	-1.17717	-1.14397	-1.44559	+	Cluster -1	254	3.21116	0.00302679	sp|P61289|PSME3_HUMAN	P61289	PSME3_HUMAN	PSME3	Proteasome activator complex subunit 3
-0.160706	0.848068	0.619364	0.735488	1.01485	0.721789	-1.2367	-1.17407	-1.36808	+	Cluster -1	1124	3.30343	0.00267352	sp|O94851|MICA2_HUMAN	O94851	MICA2_HUMAN	MICAL2	[F-actin]-monooxygenase MICAL2
-0.449414	0.343443	0.0672494	1.93474	0.204276	0.854315	-0.960825	-1.35044	-0.643338	+	Cluster -1	354	1.74079	0.0141815	sp|Q9NSB8|HOME2_HUMAN	Q9NSB8	HOME2_HUMAN	HOMER2	Homer protein homolog 2
-1.16869	0.271667	-0.231716	1.74064	0.405187	1.24174	-0.826754	-0.891826	-0.540245	+	Cluster -1	339	1.77442	0.0131738	sp|Q9UHE8|STEA1_HUMAN	Q9UHE8	STEA1_HUMAN	STEAP1	Metalloreductase STEAP1
-1.27778	1.0246	-0.281507	1.56878	0.816636	0.494067	-0.645052	-0.902414	-0.79733	+	Cluster -1	368	1.15049	0.0361588	sp|Q9NVF7|FBX28_HUMAN	Q9NVF7	FBX28_HUMAN	FBXO28	F-box only protein 28
-0.891034	0.913246	-0.324152	1.27483	0.541794	1.21562	-1.41617	-0.629799	-0.68434	+	Cluster -1	562	1.55787	0.0183641	sp|O15270|SPTC2_HUMAN	O15270	SPTC2_HUMAN	SPTLC2	Serine palmitoyltransferase 2
-1.07689	1.14461	-0.107556	1.48907	0.572766	0.626604	-1.25179	-0.836349	-0.560459	+	Cluster -1	1101	1.17287	0.0349416	sp|O60879|DIAP2_HUMAN	O60879	DIAP2_HUMAN	DIAPH2	Protein diaphanous homolog 2
-0.961609	1.14768	-0.26422	1.65078	0.407838	0.591136	-1.23393	-0.791776	-0.545887	+	Cluster -1	466	1.0946	0.0407438	sp|O75390|CISY_HUMAN	O75390	CISY_HUMAN	CS	Citrate synthase, mitochondrial
-0.697401	0.962559	0.56013	1.51858	0.259484	0.592487	-1.36588	-0.981725	-0.848228	+	Cluster -1	747	1.51788	0.0193942	sp|Q9Y6A1|POMT1_HUMAN	Q9Y6A1	POMT1_HUMAN	POMT1	Protein O-mannosyl-transferase 1
-0.243246	0.930145	0.14994	1.54377	0.117165	0.886549	-1.17068	-0.949273	-1.26438	+	Cluster -1	641	1.95403	0.0104502	sp|O60476|MA1A2_HUMAN	O60476	MA1A2_HUMAN	MAN1A2	Mannosyl-oligosaccharide 1,2-alpha-mannosidase IB
-0.988335	0.112004	-1.74999	1.16541	1.16565	0.866697	-0.655376	-0.111418	0.195366	+	Cluster -1	1438	1.69186	0.0152741	sp|P30622|CLIP1_HUMAN	P30622	CLIP1_HUMAN	CLIP1	CAP-Gly domain-containing linker protein 1
-0.880285	0.706662	-1.51632	1.54006	0.853694	0.544145	-0.955154	-0.339592	0.0467968	+	Cluster -1	440	1.02174	0.04748	sp|P62191|PRS4_HUMAN	P62191	PRS4_HUMAN	PSMC1	26S proteasome regulatory subunit 4
-0.637044	0.883259	-0.998132	0.851984	1.25819	1.00397	-1.43427	-0.545285	-0.382674	+	Cluster -1	151	1.4061	0.0235036	sp|P62277|RS13_HUMAN	P62277	RS13_HUMAN	RPS13	40S ribosomal protein S13
-0.237071	0.890993	-0.991601	0.778574	1.1422	1.10164	-1.40105	-0.999163	-0.284527	+	Cluster -1	291	1.50798	0.0197925	sp|Q9NVV0|TM38B_HUMAN	Q9NVV0	TM38B_HUMAN	TMEM38B	Trimeric intracellular cation channel type B
-0.7125	0.789228	-1.06886	0.612225	1.25307	1.3525	-0.862562	-0.307592	-1.05552	+	Cluster -1	741	1.47983	0.0208165	sp|Q8IWA4|MFN1_HUMAN	Q8IWA4	MFN1_HUMAN	MFN1	Mitofusin-1
-0.326837	0.453763	-0.682256	1.57573	1.6547	-0.338592	-0.570355	-0.858476	-0.907685	+	Cluster -1	152	1.15774	0.0357751	sp|P15531|NDKA_HUMAN	P15531	NDKA_HUMAN	NME1	Nucleoside diphosphate kinase A
-0.523879	0.829636	-0.120553	0.73978	1.95061	-0.147948	-0.671512	-1.23289	-0.823243	+	Cluster -1	727	1.13263	0.0375987	sp|P46199|IF2M_HUMAN	P46199	IF2M_HUMAN	MTIF2	Translation initiation factor IF-2, mitochondrial
-1.22341	0.297382	-0.946407	1.24229	1.76268	0.311095	-0.551174	-0.63332	-0.259136	+	Cluster -1	277	1.53054	0.0190267	sp|Q99436|PSB7_HUMAN	Q99436	PSB7_HUMAN	PSMB7	Proteasome subunit beta type-7
-1.42258	0.3282	-0.795928	0.451193	2.12864	0.344362	-0.46214	-0.237245	-0.334505	+	Cluster -1	1357	1.03954	0.0458223	sp|Q86UP2|KTN1_HUMAN	Q86UP2	KTN1_HUMAN	KTN1	Kinectin
-1.1087	0.610879	-0.557086	0.669266	2.07302	0.18607	-0.927123	-0.475724	-0.470593	+	Cluster -1	204	1.0401	0.0458292	sp|P52565|GDIR1_HUMAN	P52565	GDIR1_HUMAN	ARHGDIA	Rho GDP-dissociation inhibitor 1
-0.666424	0.574429	-1.4441	0.786641	1.80999	0.513278	-0.249982	-0.514602	-0.809233	+	Cluster -1	471	1.20856	0.0329241	sp|P48723|HSP13_HUMAN	P48723	HSP13_HUMAN	HSPA13	Heat shock 70 kDa protein 13
-0.931415	0.195177	-1.15645	1.32357	1.71732	-0.12121	-1.01741	-0.0599424	0.0503566	+	Cluster -1	403	1.03573	0.0462328	sp|P39023|RL3_HUMAN	P39023	RL3_HUMAN	RPL3	60S ribosomal protein L3
-1.29442	-0.159943	-0.631643	1.68702	1.50974	-0.349341	-0.780079	0.157345	-0.138689	+	Cluster -1	803	1.02108	0.0474969	sp|P14625|ENPL_HUMAN	P14625	ENPL_HUMAN	HSP90B1	Endoplasmin
-0.829737	-0.120873	-1.05642	1.16603	2.04942	-0.114153	-0.436716	-0.0115774	-0.645968	+	Cluster -1	379	1.25546	0.0301266	sp|Q9NX58|LYAR_HUMAN	Q9NX58	LYAR_HUMAN	LYAR	Cell growth-regulating nucleolar protein
-0.839088	-0.133738	-0.584361	1.28877	2.02259	0.0339917	-0.798904	-0.327186	-0.662069	+	Cluster -1	128	1.57111	0.0179538	sp|P35268|RL22_HUMAN	P35268	RL22_HUMAN	RPL22	60S ribosomal protein L22
0.754578	1.18166	0.335312	0.945239	-0.921936	0.88582	-0.958569	-1.16593	-1.05617	+	Cluster -1	299	1.44826	0.021969	sp|Q96M11|HYLS1_HUMAN	Q96M11	HYLS1_HUMAN	HYLS1	Hydrolethalus syndrome protein 1
0.799262	0.856998	0.00106784	1.34504	-0.425042	0.822529	-1.04341	-1.39645	-0.959992	+	Cluster -1	1746	1.67064	0.0157297	sp|Q9H792|PEAK1_HUMAN	Q9H792	PEAK1_HUMAN	PEAK1	Inactive tyrosine-protein kinase PEAK1
0.93424	0.739193	-0.271883	1.71199	-0.432637	0.359405	-0.899668	-1.35231	-0.788336	+	Cluster -1	528	1.12681	0.0380344	sp|P54577|SYYC_HUMAN	P54577	SYYC_HUMAN	YARS1	Tyrosine--tRNA ligase, cytoplasmic
0.375876	0.432661	-0.103663	1.31814	0.520285	0.897438	-0.937	-1.89796	-0.605781	+	Cluster -1	911	2.27726	0.00678174	sp|P49917|DNLI4_HUMAN	P49917	DNLI4_HUMAN	LIG4	DNA ligase 4
0.613895	0.269187	-0.749431	0.888389	0.327917	1.60168	-0.591408	-1.6227	-0.737532	+	Cluster -1	242	1.54552	0.018591	sp|Q96GX9|MTNB_HUMAN	Q96GX9	MTNB_HUMAN	APIP	Methylthioribulose-1-phosphate dehydratase
0.781869	0.480679	-1.10095	1.10997	0.298998	1.10525	-0.587448	-1.7063	-0.382074	+	Cluster -1	387	1.07799	0.0422911	sp|O95801|TTC4_HUMAN	O95801	TTC4_HUMAN	TTC4	Tetratricopeptide repeat protein 4
0.17977	1.01133	-0.461995	0.888331	0.0462714	1.332	-0.222311	-1.75457	-1.01883	+	Cluster -1	1075	1.22728	0.0317961	sp|A5A3E0|POTEF_HUMAN	A5A3E0	POTEF_HUMAN	POTEF	POTE ankyrin domain family member F
0.262349	0.295533	-0.00233388	1.66046	-0.190527	1.08724	-0.748645	-0.675379	-1.6887	+	Cluster -1	64	1.52186	0.0192844	sp|Q9NPE3|NOP10_HUMAN	Q9NPE3	NOP10_HUMAN	NOP10	H/ACA ribonucleoprotein complex subunit 3
-0.163115	-0.359422	0.474491	2.04351	0.0763221	0.682947	-0.376242	-1.17055	-1.20795	+	Cluster -1	185	1.3442	0.025828	sp|P51452|DUS3_HUMAN	P51452	DUS3_HUMAN	DUSP3	Dual specificity protein phosphatase 3
-0.0390237	-0.180185	0.774272	1.89116	0.45587	0.0892873	-1.18018	-1.4258	-0.385406	+	Cluster -1	1538	1.30601	0.0278286	sp|Q12766|HMGX3_HUMAN	Q12766	HMGX3_HUMAN	HMGXB3	HMG domain-containing protein 3
0.293702	0.67012	0.96103	1.62272	-0.156398	-0.181793	-0.589467	-1.49826	-1.12166	+	Cluster -1	2897	1.37639	0.0246097	sp|Q3L8U1|CHD9_HUMAN	Q3L8U1	CHD9_HUMAN	CHD9	Chromodomain-helicase-DNA-binding protein 9
0.663518	0.0606105	0.616441	1.6196	0.39084	-0.127499	-0.596963	-1.85096	-0.775586	+	Cluster -1	4861	1.38869	0.0242299	sp|Q15751|HERC1_HUMAN	Q15751	HERC1_HUMAN	HERC1	Probable E3 ubiquitin-protein ligase HERC1
1.61106	1.2659	-0.0440866	-0.358527	0.840125	-1.21845	-0.6427	-0.649516	-0.803811	+	Cluster -2	508	1.0119	0.0486992	sp|Q8N9M5|TM102_HUMAN	Q8N9M5	TM102_HUMAN	TMEM102	Transmembrane protein 102
1.45287	0.918453	0.778377	-0.255488	0.482333	-1.22515	-1.5715	-0.250716	-0.329179	+	Cluster -2	737	1.35941	0.0251389	sp|Q32M88|PGGHG_HUMAN	Q32M88	PGGHG_HUMAN	PGGHG	Protein-glucosylgalactosylhydroxylysine glucosidase
1.20731	0.982963	0.862128	-0.218571	0.788254	-1.12898	-1.43044	-0.904443	-0.158219	+	Cluster -2	512	1.40645	0.0235	sp|Q6ZN54|DEFI8_HUMAN	Q6ZN54	DEFI8_HUMAN	DEF8	Differentially expressed in FDCP 8 homolog
1.57257	0.968671	0.948166	-0.346002	0.466328	-1.14951	-0.87784	-0.725806	-0.856578	+	Cluster -2	337	2.12099	0.00849819	sp|O43414|ERI3_HUMAN	O43414	ERI3_HUMAN	ERI3	ERI1 exoribonuclease 3
1.03488	0.431216	1.97453	0.0146841	-0.577311	-0.499799	-1.1925	-0.853649	-0.332044	+	Cluster -2	834	1.94887	0.010502	sp|Q14644|RASA3_HUMAN	Q14644	RASA3_HUMAN	RASA3	Ras GTPase-activating protein 3
0.952583	0.690646	1.70398	0.112025	-0.609349	-0.612988	-1.41806	-0.960011	0.141166	+	Cluster -2	353	1.68999	0.0153123	sp|Q9NXG2|THUM1_HUMAN	Q9NXG2	THUM1_HUMAN	THUMPD1	THUMP domain-containing protein 1
1.02812	0.860564	1.67968	0.147598	-0.220728	-0.734856	-0.792669	-1.30501	-0.662702	+	Cluster -2	1076	2.71179	0.00418362	sp|Q8NB46|ANR52_HUMAN	Q8NB46	ANR52_HUMAN	ANKRD52	Serine/threonine-protein phosphatase 6 regulatory ankyrin repeat subunit C
1.08455	1.0348	1.67901	-0.140923	-0.453988	-0.970047	-0.934324	-0.807903	-0.491171	+	Cluster -2	402	3.15224	0.00295935	sp|Q7Z6K3|PTAR1_HUMAN	Q7Z6K3	PTAR1_HUMAN	PTAR1	Protein prenyltransferase alpha subunit repeat-containing protein 1
1.11604	1.19769	1.35293	-0.124274	-0.262676	-0.723447	-1.47255	-0.792986	-0.290735	+	Cluster -2	493	2.80471	0.00391701	sp|Q9UPQ4|TRI35_HUMAN	Q9UPQ4	TRI35_HUMAN	TRIM35	Tripartite motif-containing protein 35
1.49522	0.331341	1.21395	0.252718	-0.0236955	-0.655552	-1.70314	-0.886214	-0.0246225	+	Cluster -2	155	1.47433	0.02085	sp|Q5VZT2|CJ113_HUMAN	Q5VZT2	CJ113_HUMAN	C10orf113	Putative uncharacterized protein C10orf113
1.35137	1.19107	0.644188	0.365047	-0.502202	-1.1807	-0.996694	-1.20642	0.334338	+	Cluster -2	219	1.33467	0.0263274	sp|Q92963|RIT1_HUMAN	Q92963	RIT1_HUMAN	RIT1	GTP-binding protein Rit1
1.46956	1.26257	1.02429	-0.641901	-0.23415	-1.03039	-0.956742	-0.867493	-0.0257477	+	Cluster -2	420	2.78421	0.004	sp|Q9H6P5|TASP1_HUMAN	Q9H6P5	TASP1_HUMAN	TASP1	Threonine aspartase 1
1.02556	1.2701	1.15416	-0.454005	-0.470249	-0.405041	-1.48963	-1.02031	0.389421	+	Cluster -2	152	1.84248	0.0118829	sp|P61088|UBE2N_HUMAN	P61088	UBE2N_HUMAN	UBE2N	Ubiquitin-conjugating enzyme E2 N
1.32402	1.22722	0.875415	-0.733434	-0.693781	-0.633295	-1.25366	-0.754902	0.642407	+	Cluster -2	532	1.77487	0.0131796	sp|P17024|ZNF20_HUMAN	P17024	ZNF20_HUMAN	ZNF20	Zinc finger protein 20
0.248203	1.93047	0.9929	-1.27226	0.0678935	-0.299242	-0.787679	-0.942707	0.0624201	+	Cluster -2	745	1.29273	0.0285356	sp|O60645|EXOC3_HUMAN	O60645	EXOC3_HUMAN	EXOC3	Exocyst complex component 3
0.864003	1.40691	1.05081	-1.3827	0.534651	-0.0865573	-0.644871	-0.995919	-0.746324	+	Cluster -2	211	1.72324	0.0144892	sp|Q969X0|RIPL2_HUMAN	Q969X0	RIPL2_HUMAN	RILPL2	RILP-like protein 2
0.994631	0.892015	1.31866	-1.76627	0.170027	0.186599	-0.414339	-0.979652	-0.401672	+	Cluster -2	974	1.35015	0.0255651	sp|Q96A65|EXOC4_HUMAN	Q96A65	EXOC4_HUMAN	EXOC4	Exocyst complex component 4
0.571621	1.52449	1.38361	-1.1127	0.131276	0.0392552	-0.990789	-0.776908	-0.769853	+	Cluster -2	449	2.1624	0.0079798	sp|Q9NWS8|RMND1_HUMAN	Q9NWS8	RMND1_HUMAN	RMND1	Required for meiotic nuclear division protein 1 homolog
0.274315	1.33362	1.76726	-1.03198	0.175809	-0.256104	-0.914559	-0.915075	-0.433281	+	Cluster -2	368	1.75297	0.0138915	sp|P49842|STK19_HUMAN	P49842	STK19_HUMAN	STK19	Serine/threonine-protein kinase 19
0.525909	1.08986	1.73668	-0.916649	0.219641	-0.0758243	-0.665942	-0.538063	-1.37562	+	Cluster -2	813	1.91734	0.0107838	sp|Q8TEQ0|SNX29_HUMAN	Q8TEQ0	SNX29_HUMAN	SNX29	Sorting nexin-29
0.752182	1.17759	1.28725	-0.724266	0.640764	-0.241846	-0.991785	-1.5015	-0.3984	+	Cluster -2	258	1.99687	0.00973995	sp|Q96H20|SNF8_HUMAN	Q96H20	SNF8_HUMAN	SNF8	Vacuolar-sorting protein SNF8
0.932406	1.34803	1.25132	-0.562784	0.0626345	-0.151942	-0.589436	-1.61088	-0.679354	+	Cluster -2	807	2.795	0.00396712	sp|Q52LR7|EPC2_HUMAN	Q52LR7	EPC2_HUMAN	EPC2	Enhancer of polycomb homolog 2
0.859106	1.24234	0.663661	-0.619709	1.02661	0.0903241	-1.25465	-1.35199	-0.655693	+	Cluster -2	1374	1.92807	0.0106583	sp|Q9NRR4|RNC_HUMAN	Q9NRR4	RNC_HUMAN	DROSHA	Ribonuclease 3
0.717296	1.54825	0.716107	-1.01044	0.402569	0.439187	-0.951126	-1.46091	-0.400931	+	Cluster -2	977	1.57435	0.0178699	sp|Q9UGR2|Z3H7B_HUMAN	Q9UGR2	Z3H7B_HUMAN	ZC3H7B	Zinc finger CCCH domain-containing protein 7B
1.25311	0.854909	1.07655	-1.20703	0.539115	0.106228	-1.44311	-0.554277	-0.625497	+	Cluster -2	476	1.66953	0.0157816	sp|Q96QF0|RAB3I_HUMAN	Q96QF0	RAB3I_HUMAN	RAB3IP	Rab-3A-interacting protein
0.820749	1.26031	1.05881	-0.961617	0.690248	-0.0509456	-1.53354	-0.778155	-0.505858	+	Cluster -2	477	1.78492	0.0130466	sp|P56270|MAZ_HUMAN	P56270	MAZ_HUMAN	MAZ	Myc-associated zinc finger protein
0.907309	1.10446	1.47759	-0.987229	0.337405	-1.13091	-0.834882	-0.841542	-0.0322102	+	Cluster -2	735	1.86528	0.0115283	sp|Q9NUT2|MITOS_HUMAN	Q9NUT2	MITOS_HUMAN	ABCB8	Mitochondrial potassium channel ATP-binding subunit
0.776986	1.17484	1.44836	-1.05539	0.363647	-0.833271	-1.34873	-0.36384	-0.162598	+	Cluster -2	483	1.68262	0.0154802	sp|Q92599|SEPT8_HUMAN	Q92599	SEPT8_HUMAN	SEPTIN8	Septin-8
0.755824	0.16055	2.18164	-0.747781	0.218499	-0.737001	-1.05707	-0.582078	-0.192592	+	Cluster -2	272	1.21523	0.0325559	sp|O43741|AAKB2_HUMAN	O43741	AAKB2_HUMAN	PRKAB2	5'-AMP-activated protein kinase subunit beta-2
1.47047	0.533947	1.33234	-1.57078	0.0730007	-0.490319	-0.646146	0.0960218	-0.798532	+	Cluster -2	192	1.58785	0.0176062	sp|Q8TBK6|ZCH10_HUMAN	Q8TBK6	ZCH10_HUMAN	ZCCHC10	Zinc finger CCHC domain-containing protein 10
1.26104	0.278423	1.40532	-1.3055	0.809725	-0.538643	-1.14089	-0.150723	-0.618753	+	Cluster -2	69	1.06365	0.043514	sp|P56385|ATP5I_HUMAN	P56385	ATP5I_HUMAN	ATP5ME	ATP synthase subunit e, mitochondrial
1.06764	-0.0746958	1.73591	-1.05386	0.814214	-0.0115453	-0.794523	-0.940844	-0.742302	+	Cluster -2	167	1.09564	0.0406434	sp|Q9H1K1|ISCU_HUMAN	Q9H1K1	ISCU_HUMAN	ISCU	Iron-sulfur cluster assembly enzyme ISCU, mitochondrial
1.19716	0.232866	1.41211	-1.08319	1.02746	-0.554121	-0.781661	-1.12489	-0.325737	+	Cluster -2	1684	1.06876	0.0430709	sp|Q70EL1|UBP54_HUMAN	Q70EL1	UBP54_HUMAN	USP54	Inactive ubiquitin carboxyl-terminal hydrolase 54
0.308342	1.89854	1.02604	0.290633	-1.20071	-0.395584	-0.862685	-0.175791	-0.88878	+	Cluster -2	406	1.4105	0.0233588	sp|Q9Y2U9|KLDC2_HUMAN	Q9Y2U9	KLDC2_HUMAN	KLHDC2	Kelch domain-containing protein 2
0.37509	2.07639	0.530265	0.230816	-1.03515	0.165675	-1.05833	-0.35159	-0.933171	+	Cluster -2	373	1.24768	0.0305434	sp|Q9Y2P8|RCL1_HUMAN	Q9Y2P8	RCL1_HUMAN	RCL1	RNA 3'-terminal phosphate cyclase-like protein
0.643239	1.47608	1.25982	-0.110339	-0.449735	-0.270318	-1.24495	0.100739	-1.40453	+	Cluster -2	450	1.94448	0.010618	sp|Q15573|TAF1A_HUMAN	Q15573	TAF1A_HUMAN	TAF1A	TATA box-binding protein-associated factor RNA polymerase I subunit A
0.643193	1.57961	1.10983	0.439865	-0.505757	-0.905007	-1.26284	-0.106413	-0.992476	+	Cluster -2	483	1.72757	0.0143919	sp|Q05084|ICA69_HUMAN	Q05084	ICA69_HUMAN	ICA1	Islet cell autoantigen 1
0.897437	0.76392	1.67867	-0.164223	-1.18326	0.202437	-1.21454	-0.060498	-0.919942	+	Cluster -2	743	1.65946	0.0160673	sp|Q8IYQ7|THNS1_HUMAN	Q8IYQ7	THNS1_HUMAN	THNSL1	Threonine synthase-like 1
0.31219	1.33411	1.62861	-0.196126	-0.739925	0.31099	-1.30374	-0.371474	-0.974635	+	Cluster -2	828	1.83637	0.011941	sp|Q9HCL2|GPAT1_HUMAN	Q9HCL2	GPAT1_HUMAN	GPAM	Glycerol-3-phosphate acyltransferase 1, mitochondrial
0.959956	0.631385	1.45354	0.324103	-0.916343	0.0686097	-1.81907	-0.527232	-0.174948	+	Cluster -2	889	1.41554	0.0231119	sp|Q6P5Z2|PKN3_HUMAN	Q6P5Z2	PKN3_HUMAN	PKN3	Serine/threonine-protein kinase N3
0.605739	1.66437	1.03492	-0.663517	-0.790711	0.558831	-0.826499	-1.28036	-0.302779	+	Cluster -2	597	1.7082	0.0149387	sp|Q9UJP4|KLH21_HUMAN	Q9UJP4	KLH21_HUMAN	KLHL21	Kelch-like protein 21
0.700015	0.590446	1.5123	-0.433331	-0.423458	0.898932	-1.07939	-1.58115	-0.184354	+	Cluster -2	522	1.42336	0.022847	sp|Q9BPZ7|SIN1_HUMAN	Q9BPZ7	SIN1_HUMAN	MAPKAP1	Target of rapamycin complex 2 subunit MAPKAP1
1.05749	0.951224	1.46606	-0.369134	-0.79576	0.301584	-1.02641	-1.36585	-0.219195	+	Cluster -2	534	2.22189	0.00718127	sp|Q9BUI4|RPC3_HUMAN	Q9BUI4	RPC3_HUMAN	POLR3C	DNA-directed RNA polymerase III subunit RPC3
-0.304661	1.80889	1.5181	-0.370196	-0.446422	0.138376	-0.967163	-0.90251	-0.474412	+	Cluster -2	1210	1.29089	0.0286019	sp|P00533|EGFR_HUMAN	P00533	EGFR_HUMAN	EGFR	Epidermal growth factor receptor
-0.128502	1.55003	1.65965	-0.264404	-0.818477	0.207066	-0.669089	-1.22423	-0.312038	+	Cluster -2	925	1.29602	0.0283872	sp|Q13469|NFAC2_HUMAN	Q13469	NFAC2_HUMAN	NFATC2	Nuclear factor of activated T-cells, cytoplasmic 2
0.397566	1.75617	1.29622	-0.0164025	-1.15476	-0.0303298	-0.798069	-0.889884	-0.560513	+	Cluster -2	385	1.89638	0.0110416	sp|Q6P444|MTFR2_HUMAN	Q6P444	MTFR2_HUMAN	MTFR2	Mitochondrial fission regulator 2
-0.0353385	1.80957	1.23702	0.295236	-0.671334	0.0953202	-1.1877	-0.923597	-0.61918	+	Cluster -2	583	1.53329	0.0189729	sp|O15091|MRPP3_HUMAN	O15091	MRPP3_HUMAN	PRORP	Mitochondrial ribonuclease P catalytic subunit
0.346923	1.43852	1.1782	-1.41514	-0.311084	0.527246	-1.22223	0.178106	-0.720548	+	Cluster -2	436	1.05673	0.0440624	sp|P55347|PKNX1_HUMAN	P55347	PKNX1_HUMAN	PKNOX1	Homeobox protein PKNOX1
0.746969	1.29514	1.06248	-0.833728	-0.958161	0.963825	-1.19904	-0.344464	-0.733017	+	Cluster -2	172	1.3534	0.0253683	sp|P41208|CETN2_HUMAN	P41208	CETN2_HUMAN	CETN2	Centrin-2
0.175701	1.2015	1.25263	-1.2617	-0.729679	-0.484224	0.445064	0.753916	-1.35321	+	Cluster -2	376	1.02458	0.0471507	sp|Q8NEW0|ZNT7_HUMAN	Q8NEW0	ZNT7_HUMAN	SLC30A7	Zinc transporter 7
0.00703968	1.33962	1.23138	-1.26674	-0.577968	-1.05215	0.746619	0.491233	-0.919032	+	Cluster -2	190	1.29829	0.0282723	sp|O15431|COPT1_HUMAN	O15431	COPT1_HUMAN	SLC31A1	High affinity copper uptake protein 1
0.558137	1.7347	1.01941	-1.17284	-1.0832	-0.522608	0.302551	0.0160887	-0.852235	+	Cluster -2	443	2.03765	0.0093348	sp|Q9BZG8|DPH1_HUMAN	Q9BZG8	DPH1_HUMAN	DPH1	2-(3-amino-3-carboxypropyl)histidine synthase subunit 1
0.988878	1.71984	0.652305	-1.29265	-0.730884	-0.292334	0.14496	-0.0387418	-1.15137	+	Cluster -2	594	1.75342	0.0138962	sp|Q9BTC8|MTA3_HUMAN	Q9BTC8	MTA3_HUMAN	MTA3	Metastasis-associated protein MTA3
0.866676	1.59267	0.669765	-1.49956	-0.646808	-0.234241	0.24729	0.203818	-1.19962	+	Cluster -2	334	1.43445	0.0224021	sp|Q86WC4|OSTM1_HUMAN	Q86WC4	OSTM1_HUMAN	OSTM1	Osteopetrosis-associated transmembrane protein 1
0.459082	1.54076	0.950923	-0.994846	-1.75786	0.0821204	0.26995	0.0414144	-0.591539	+	Cluster -2	590	1.418	0.02306	sp|Q8IZ07|AN13A_HUMAN	Q8IZ07	AN13A_HUMAN	ANKRD13A	Ankyrin repeat domain-containing protein 13A
0.794083	1.51198	1.00054	-1.46432	0.300394	-1.08986	0.0254486	-0.341582	-0.736682	+	Cluster -2	464	1.62816	0.016802	sp|Q9BZ67|FRMD8_HUMAN	Q9BZ67	FRMD8_HUMAN	FRMD8	FERM domain-containing protein 8
1.00145	1.62788	1.06587	-1.3742	-0.446697	-0.344037	-0.805166	-0.146285	-0.578813	+	Cluster -2	87	2.57844	0.00444674	sp|Q9NYJ1|COA4_HUMAN	Q9NYJ1	COA4_HUMAN	COA4	Cytochrome c oxidase assembly factor 4 homolog, mitochondrial
0.863153	1.36856	1.55311	-1.16593	-0.355879	-0.390065	-0.847308	-0.303313	-0.722322	+	Cluster -2	658	2.94059	0.00322204	sp|Q9NV88|INT9_HUMAN	Q9NV88	INT9_HUMAN	INTS9	Integrator complex subunit 9
0.741341	1.43767	1.44555	-1.27203	-0.967412	-0.232151	-0.126311	-0.780812	-0.245853	+	Cluster -2	379	2.53687	0.00455426	sp|Q9UH62|ARMX3_HUMAN	Q9UH62	ARMX3_HUMAN	ARMCX3	Armadillo repeat-containing X-linked protein 3
0.60343	1.1038	1.85301	-0.987683	-0.984819	-0.583276	-0.0396333	-0.822438	-0.142393	+	Cluster -2	1758	2.40687	0.00566169	sp|A6NKT7|RGPD3_HUMAN	A6NKT7	RGPD3_HUMAN	RGPD3	RanBP2-like and GRIP domain-containing protein 3
0.582127	1.46188	1.61959	-0.608358	-0.987086	-0.659496	-0.147963	-0.239825	-1.02087	+	Cluster -2	418	2.50509	0.00487558	sp|Q6GMV2|SMYD5_HUMAN	Q6GMV2	SMYD5_HUMAN	SMYD5	SET and MYND domain-containing protein 5
0.724651	1.59309	1.46841	-1.04853	-0.815031	-0.476956	-0.305208	-0.418355	-0.722065	+	Cluster -2	669	3.1757	0.00297674	sp|Q7RTS9|DYM_HUMAN	Q7RTS9	DYM_HUMAN	DYM	Dymeclin
0.279741	1.53906	1.71832	-1.18038	-0.637986	-0.576455	-0.353363	-0.268556	-0.520387	+	Cluster -2	622	2.19592	0.00739386	sp|Q6PCE3|PGM2L_HUMAN	Q6PCE3	PGM2L_HUMAN	PGM2L1	Glucose 1,6-bisphosphate synthase
0.273533	1.78298	1.55352	-0.742195	-0.720768	-0.453311	-0.313664	-0.634536	-0.745561	+	Cluster -2	392	2.20239	0.00730663	sp|O15382|BCAT2_HUMAN	O15382	BCAT2_HUMAN	BCAT2	Branched-chain-amino-acid aminotransferase, mitochondrial
-0.0566894	1.59529	1.16006	-0.872449	-1.43155	-0.324686	-0.477336	0.86677	-0.459405	+	Cluster -2	602	1.16664	0.0352885	sp|Q8N3X6|LCORL_HUMAN	Q8N3X6	LCORL_HUMAN	LCORL	Ligand-dependent nuclear receptor corepressor-like protein
0.21442	0.987446	1.44812	-1.53282	-1.29827	0.0778801	-0.377331	0.780167	-0.299614	+	Cluster -2	198	1.22309	0.0321016	sp|Q9NQ34|TMM9B_HUMAN	Q9NQ34	TMM9B_HUMAN	TMEM9B	Transmembrane protein 9B
-0.162694	1.67184	0.481162	-1.46556	-1.34058	-0.240071	0.935563	-0.115614	0.235953	+	Cluster -2	524	1.18781	0.0341793	sp|Q96E52|OMA1_HUMAN	Q96E52	OMA1_HUMAN	OMA1	Metalloendopeptidase OMA1, mitochondrial
0.112092	1.44041	0.242088	-1.13927	-1.59053	-0.71434	1.12201	0.506697	0.0208432	+	Cluster -2	438	1.76421	0.013445	sp|Q92685|ALG3_HUMAN	Q92685	ALG3_HUMAN	ALG3	Dol-P-Man:Man(5)GlcNAc(2)-PP-Dol alpha-1,3-mannosyltransferase
-0.247537	1.68222	1.29719	-1.43733	-1.14017	-0.0984515	0.118185	-0.190617	0.0165147	+	Cluster -2	578	1.22499	0.0320059	sp|Q9UJ83|HACL1_HUMAN	Q9UJ83	HACL1_HUMAN	HACL1	2-hydroxyacyl-CoA lyase 1
0.187883	1.91353	0.588549	-1.69448	-1.01102	-0.0353536	-0.00328335	-0.14694	0.201111	+	Cluster -2	874	1.24231	0.0308764	sp|Q9H6E5|STPAP_HUMAN	Q9H6E5	STPAP_HUMAN	TUT1	Speckle targeted PIP5K1A-regulated poly(A) polymerase
0.196869	1.19746	0.917303	-1.93429	-1.17338	-0.170464	0.154525	0.101853	0.710125	+	Cluster -2	1712	1.6098	0.0171337	sp|P08572|CO4A2_HUMAN	P08572	CO4A2_HUMAN	COL4A2	Collagen alpha-2(IV) chain
0.27876	0.888814	0.417047	-1.87123	-1.32047	0.0448357	0.935356	-0.252164	0.879055	+	Cluster -2	505	1.257	0.0300218	sp|Q9C0B1|FTO_HUMAN	Q9C0B1	FTO_HUMAN	FTO	Alpha-ketoglutarate-dependent dioxygenase FTO
0.0486112	1.52761	1.086	-0.853944	-1.56803	-0.753399	-0.412334	0.206978	0.718504	+	Cluster -2	513	1.68868	0.0153451	sp|Q92993|KAT5_HUMAN	Q92993	KAT5_HUMAN	KAT5	Histone acetyltransferase KAT5
0.37826	1.37418	1.38773	-1.02901	-1.47438	-0.87511	0.00964752	0.0194003	0.209281	+	Cluster -2	1765	2.86196	0.00360819	sp|O14715|RGPD8_HUMAN	O14715	RGPD8_HUMAN	RGPD8	RANBP2-like and GRIP domain-containing protein 8
0.219176	1.04513	1.71649	-0.786788	-1.49626	-0.805803	-0.141132	-0.296846	0.54603	+	Cluster -2	600	1.90489	0.0109013	sp|Q5TA45|INT11_HUMAN	Q5TA45	INT11_HUMAN	INTS11	Integrator complex subunit 11
0.939056	1.23872	1.11229	-1.20857	-1.34559	-0.946745	-0.0109744	-0.1668	0.388619	+	Cluster -2	646	4.31513	0.000230769	sp|P30291|WEE1_HUMAN	P30291	WEE1_HUMAN	WEE1	Wee1-like protein kinase
0.917946	0.975132	1.08008	-1.32235	-1.31245	-1.06587	-0.00626584	0.0810078	0.652772	+	Cluster -2	166	4.22666	0.00020339	sp|Q9Y3C6|PPIL1_HUMAN	Q9Y3C6	PPIL1_HUMAN	PPIL1	Peptidyl-prolyl cis-trans isomerase-like 1
0.937437	1.20425	0.830523	-0.797759	-1.77528	-0.759212	0.198685	-0.450496	0.611854	+	Cluster -2	723	2.35664	0.00597806	sp|Q08426|ECHP_HUMAN	Q08426	ECHP_HUMAN	EHHADH	Peroxisomal bifunctional enzyme
1.19752	0.820094	1.04101	-0.941238	-1.38188	-1.06726	0.708541	-0.57706	0.200281	+	Cluster -2	417	2.69195	0.00424697	sp|P12532|KCRU_HUMAN	P12532	KCRU_HUMAN	CKMT1A	Creatine kinase U-type, mitochondrial
0.0547535	2.31855	0.191419	-0.715322	-1.32104	-0.563805	0.0902277	-0.0408618	-0.0139242	+	Cluster -2	1669	1.05735	0.0440231	sp|P02462|CO4A1_HUMAN	P02462	CO4A1_HUMAN	COL4A1	Collagen alpha-1(IV) chain
-0.120969	2.18648	0.179505	-0.914088	-1.00192	-1.07096	0.27435	0.261089	0.206507	+	Cluster -2	306	1.20919	0.0328699	sp|P50897|PPT1_HUMAN	P50897	PPT1_HUMAN	PPT1	Palmitoyl-protein thioesterase 1
0.534516	1.7905	0.907141	-1.00219	-1.00689	-1.19669	-0.0268532	0.342639	-0.342177	+	Cluster -2	1272	2.59481	0.00450633	sp|Q9HAU5|RENT2_HUMAN	Q9HAU5	RENT2_HUMAN	UPF2	Regulator of nonsense transcripts 2
0.510354	1.97023	0.415341	-1.04627	-0.604334	-1.45336	0.252425	0.133314	-0.177692	+	Cluster -2	466	1.82021	0.0123434	sp|Q86VR2|RETR3_HUMAN	Q86VR2	RETR3_HUMAN	RETREG3	Reticulophagy regulator 3
0.90554	1.92164	0.501156	-0.833426	-0.883181	-1.30316	-0.0480986	-0.0138652	-0.2466	+	Cluster -2	952	2.43322	0.00526496	sp|Q8WUI4|HDAC7_HUMAN	Q8WUI4	HDAC7_HUMAN	HDAC7	Histone deacetylase 7
0.00765836	1.90375	0.841513	-1.31311	-0.959136	-0.792168	0.246067	0.440814	-0.37539	+	Cluster -2	243	1.61773	0.0169314	sp|Q86VZ6|JAZF1_HUMAN	Q86VZ6	JAZF1_HUMAN	JAZF1	Juxtaposed with another zinc finger protein 1
0.69924	1.57468	0.76322	-1.38969	-1.45854	-0.517061	0.281916	-0.122634	0.16886	+	Cluster -2	312	2.56824	0.00446278	sp|Q6FI81|CPIN1_HUMAN	Q6FI81	CPIN1_HUMAN	CIAPIN1	Anamorsin
0.709703	1.82102	0.522674	-1.14001	-1.34107	-0.867397	0.210017	0.108881	-0.0238139	+	Cluster -2	470	2.55491	0.00446291	sp|Q96TC7|RMD3_HUMAN	Q96TC7	RMD3_HUMAN	RMDN3	Regulator of microtubule dynamics protein 3
0.402651	1.79468	0.889615	-1.27259	-1.30185	-0.667068	0.138796	0.161085	-0.145319	+	Cluster -2	390	2.35429	0.00596403	sp|P01137|TGFB1_HUMAN	P01137	TGFB1_HUMAN	TGFB1	Transforming growth factor beta-1 proprotein
0.0596136	1.95078	0.81673	-0.939072	-0.744945	-1.3906	0.227758	-0.215064	0.2348	+	Cluster -2	776	1.70334	0.0150537	sp|Q13616|CUL1_HUMAN	Q13616	CUL1_HUMAN	CUL1	Cullin-1
-0.244814	1.53274	1.34136	-0.64564	-1.20937	-1.27946	0.473661	-0.142691	0.174221	+	Cluster -2	68	1.60409	0.0173117	sp|P60059|SC61G_HUMAN	P60059	SC61G_HUMAN	SEC61G	Protein transport protein Sec61 subunit gamma
-0.268752	1.58734	1.55105	-0.797804	-0.928613	-1.06598	-0.505106	0.112489	0.315382	+	Cluster -2	111	1.43761	0.0222461	sp|Q5JRK9|GGEE3_HUMAN	Q5JRK9	GGEE3_HUMAN	PAGE2B	Putative G antigen family E member 3
-0.168223	1.75042	1.4369	-0.69114	-0.567207	-1.30277	-0.184505	-0.507543	0.234071	+	Cluster -2	1640	1.41261	0.0232254	sp|P53675|CLH2_HUMAN	P53675	CLH2_HUMAN	CLTCL1	Clathrin heavy chain 2
0.158885	1.55782	0.362435	0.158263	-1.90559	-1.14642	-0.0435212	0.234206	0.623919	+	Cluster -2	1127	1.05983	0.0438154	sp|Q9UPR0|PLCL2_HUMAN	Q9UPR0	PLCL2_HUMAN	PLCL2	Inactive phospholipase C-like protein 2
0.73211	1.53004	0.087927	0.227104	-1.88745	-1.17248	0.0986406	0.33868	0.0454266	+	Cluster -2	188	1.11239	0.0391961	sp|Q9NX00|TM160_HUMAN	Q9NX00	TM160_HUMAN	TMEM160	Transmembrane protein 160
0.528343	1.5419	0.325069	-0.78857	-1.24087	-1.32197	-0.0619018	-0.126031	1.14403	+	Cluster -2	2320	1.78115	0.0131396	sp|Q9NSI6|BRWD1_HUMAN	Q9NSI6	BRWD1_HUMAN	BRWD1	Bromodomain and WD repeat-containing protein 1
0.375655	1.35054	0.743879	-0.49659	-1.52855	-1.5506	0.229441	0.268418	0.607808	+	Cluster -2	568	2.37069	0.00592216	sp|O95470|SGPL1_HUMAN	O95470	SGPL1_HUMAN	SGPL1	Sphingosine-1-phosphate lyase 1
0.599459	1.82108	0.33538	-0.868035	-1.05965	-1.14456	-0.698995	0.404163	0.611169	+	Cluster -2	434	1.6305	0.0168159	sp|Q96Q11|TRNT1_HUMAN	Q96Q11	TRNT1_HUMAN	TRNT1	CCA tRNA nucleotidyltransferase 1, mitochondrial
0.498107	1.75593	0.0593824	-0.986851	-1.16867	-0.675848	-0.863876	0.980406	0.401422	+	Cluster -2	797	1.09416	0.0407539	sp|Q8TEL6|TP4AP_HUMAN	Q8TEL6	TP4AP_HUMAN	TRPC4AP	Short transient receptor potential channel 4-associated protein
0.857311	1.5489	0.424044	-0.361134	-1.12594	-1.50084	-0.711167	0.710318	0.158504	+	Cluster -2	436	1.59844	0.0173904	sp|Q9Y664|KPTN_HUMAN	Q9Y664	KPTN_HUMAN	KPTN	KICSTOR complex protein kaptin
0.673557	1.47231	0.53303	-0.601226	-1.70398	-0.153595	0.647271	-1.14459	0.277228	+	Cluster -2	181	1.04891	0.0448426	sp|P18847|ATF3_HUMAN	P18847	ATF3_HUMAN	ATF3	Cyclic AMP-dependent transcription factor ATF-3
1.15201	1.25565	0.946412	-0.0262043	-1.79511	-0.142112	-0.845323	-0.489411	-0.0559128	+	Cluster -2	445	1.61257	0.0171399	sp|P68371|TBB4B_HUMAN	P68371	TBB4B_HUMAN	TUBB4B	Tubulin beta-4B chain
1.26617	1.3937	0.536049	-1.04468	-1.38038	0.057614	-0.790513	-0.539231	0.501265	+	Cluster -2	351	1.51633	0.0195049	sp|Q6P087|RUSD3_HUMAN	Q6P087	RUSD3_HUMAN	RPUSD3	Mitochondrial mRNA pseudouridine synthase RPUSD3
0.899817	1.69304	0.812094	-0.715519	-1.46343	-0.103228	-0.36666	-0.916529	0.160414	+	Cluster -2	395	1.81986	0.0123894	sp|Q92665|RT31_HUMAN	Q92665	RT31_HUMAN	MRPS31	28S ribosomal protein S31, mitochondrial
0.530847	1.93141	0.649104	-0.0920203	-0.428608	-1.39748	-0.398565	0.290698	-1.08538	+	Cluster -2	594	1.24694	0.0305827	sp|Q86TU7|SETD3_HUMAN	Q86TU7	SETD3_HUMAN	SETD3	Actin-histidine N-methyltransferase
0.757349	1.60791	0.892173	-0.679051	0.246465	-1.34688	-0.478029	0.200275	-1.20021	+	Cluster -2	428	1.42515	0.0227525	sp|Q9UQ49|NEUR3_HUMAN	Q9UQ49	NEUR3_HUMAN	NEU3	Sialidase-3
0.522915	1.81858	0.680761	-0.252929	0.0554074	-1.48444	-1.20386	0.268468	-0.404903	+	Cluster -2	797	1.10966	0.0393784	sp|Q9Y4W6|AFG32_HUMAN	Q9Y4W6	AFG32_HUMAN	AFG3L2	AFG3-like protein 2
1.65794	0.7986	0.870572	-0.257923	-0.0737193	-1.49684	-0.468418	0.114569	-1.14478	+	Cluster -2	295	1.54336	0.0186862	sp|Q8IY26|PLPP6_HUMAN	Q8IY26	PLPP6_HUMAN	PLPP6	Phospholipid phosphatase 6
1.21013	1.28258	0.739695	-0.188055	0.157221	-1.20188	-0.814392	0.265589	-1.45089	+	Cluster -2	510	1.42596	0.0227405	sp|Q9UKZ1|CNO11_HUMAN	Q9UKZ1	CNO11_HUMAN	CNOT11	CCR4-NOT transcription complex subunit 11
1.34708	1.53932	0.696218	-0.148545	-0.0973558	-0.890193	-0.993787	-0.244555	-1.20819	+	Cluster -2	451	2.37126	0.00593631	sp|O95363|SYFM_HUMAN	O95363	SYFM_HUMAN	FARS2	Phenylalanine--tRNA ligase, mitochondrial
1.30497	1.50624	0.285535	-0.518919	0.13852	-0.580947	-0.601074	0.176872	-1.7112	+	Cluster -2	911	1.28866	0.0286932	sp|Q9Y2U8|MAN1_HUMAN	Q9Y2U8	MAN1_HUMAN	LEMD3	Inner nuclear membrane protein Man1
0.815794	1.9752	0.279061	-0.733891	0.33223	-0.73007	-0.534591	-0.0302358	-1.3735	+	Cluster -2	759	1.20242	0.0333055	sp|Q9BXS9|S26A6_HUMAN	Q9BXS9	S26A6_HUMAN	SLC26A6	Solute carrier family 26 member 6
0.752811	1.97807	0.474374	-0.281213	-0.0382318	-0.681662	-0.565005	-0.0821184	-1.55702	+	Cluster -2	148	1.45339	0.0218205	sp|O75575|RPC9_HUMAN	O75575	RPC9_HUMAN	CRCP	DNA-directed RNA polymerase III subunit RPC9
-0.0368549	2.12067	1.00357	-0.366421	-0.0298281	-0.641313	-0.793079	-0.114011	-1.14273	+	Cluster -2	154	1.25072	0.0303865	sp|Q56VL3|OCAD2_HUMAN	Q56VL3	OCAD2_HUMAN	OCIAD2	OCIA domain-containing protein 2
0.115919	2.1648	0.639948	-1.05286	0.134562	-0.221422	-0.628322	-0.0036053	-1.14902	+	Cluster -2	179	1.01657	0.0480883	sp|P67812|SC11A_HUMAN	P67812	SC11A_HUMAN	SEC11A	Signal peptidase complex catalytic subunit SEC11A
0.140553	1.70309	1.22638	0.220271	-0.50685	-1.59483	-0.237062	-0.805856	-0.145691	+	Cluster -2	401	1.19077	0.0339665	sp|Q15583|TGIF1_HUMAN	Q15583	TGIF1_HUMAN	TGIF1	Homeobox protein TGIF1
0.193733	1.5216	1.74628	-0.128939	-0.719533	-0.929358	-0.380274	-0.972288	-0.331217	+	Cluster -2	417	1.80153	0.0128044	sp|P28300|LYOX_HUMAN	P28300	LYOX_HUMAN	LOX	Protein-lysine 6-oxidase
0.0573845	2.00049	0.841465	0.39806	-0.97591	-1.24846	-0.0710498	-0.2663	-0.735678	+	Cluster -2	919	1.00384	0.0496955	sp|Q9HAP2|MLXIP_HUMAN	Q9HAP2	MLXIP_HUMAN	MLXIP	MLX-interacting protein
0.388386	1.46489	1.43905	0.454504	-0.955342	-0.973478	-0.241531	-0.424576	-1.1519	+	Cluster -2	618	1.48424	0.0206188	sp|Q8IXI1|MIRO2_HUMAN	Q8IXI1	MIRO2_HUMAN	RHOT2	Mitochondrial Rho GTPase 2
0.182482	2.13044	0.87625	-0.113204	-1.34844	-0.606569	-0.540115	-0.272031	-0.308806	+	Cluster -2	218	1.38416	0.0243295	sp|Q8WXB1|MT21A_HUMAN	Q8WXB1	MT21A_HUMAN	METTL21A	Protein N-lysine methyltransferase METTL21A
0.798694	1.95485	0.956154	-0.496268	-1.03219	-0.838628	-0.493411	-0.363694	-0.485505	+	Cluster -2	768	2.78413	0.0039946	sp|Q13618|CUL3_HUMAN	Q13618	CUL3_HUMAN	CUL3	Cullin-3
-0.00273268	2.29187	0.692536	-0.364294	-0.538996	-0.765257	0.235496	-0.728043	-0.820582	+	Cluster -2	106	1.06456	0.0434388	sp|Q9Y2R0|COA3_HUMAN	Q9Y2R0	COA3_HUMAN	COA3	Cytochrome c oxidase assembly factor 3 homolog, mitochondrial
0.579111	2.17864	0.645251	-0.567051	-0.920076	-0.747131	0.0723799	-0.615004	-0.626123	+	Cluster -2	284	1.79286	0.0129409	sp|Q9UBV8|PEF1_HUMAN	Q9UBV8	PEF1_HUMAN	PEF1	Peflin
0.0644858	2.22753	0.813468	-0.523962	-0.721624	-1.12655	0.0372227	-0.316208	-0.454368	+	Cluster -2	211	1.4006	0.0236934	sp|Q9GZP4|PITH1_HUMAN	Q9GZP4	PITH1_HUMAN	PITHD1	PITH domain-containing protein 1
0.117436	2.29008	0.830479	-0.736155	-0.724884	-0.737127	-0.177741	-0.292941	-0.569143	+	Cluster -2	412	1.49781	0.0202034	sp|Q8NCC3|PAG15_HUMAN	Q8NCC3	PAG15_HUMAN	PLA2G15	Phospholipase A2 group XV
-0.164829	2.13275	1.11782	-0.179297	-0.520778	-0.759627	-0.738623	-0.0224207	-0.864998	+	Cluster -2	154	1.17986	0.0345492	sp|Q96A26|F162A_HUMAN	Q96A26	F162A_HUMAN	FAM162A	Protein FAM162A
0.0254352	1.95539	1.17974	-0.0443189	-0.845011	-1.01519	-0.820519	0.149168	-0.584701	+	Cluster -2	832	1.30631	0.0278178	sp|Q8NBJ9|SIDT2_HUMAN	Q8NBJ9	SIDT2_HUMAN	SIDT2	SID1 transmembrane family member 2
-0.538384	1.86653	1.55733	-0.252654	-0.916257	-0.773702	-0.279764	-0.311337	-0.351767	+	Cluster -2	1704	1.01512	0.0482217	sp|Q99758|ABCA3_HUMAN	Q99758	ABCA3_HUMAN	ABCA3	ATP-binding cassette sub-family A member 3
-0.274349	1.84612	1.24699	-0.503465	-0.901095	-1.10799	0.0137037	0.39554	-0.715449	+	Cluster -2	76	1.18733	0.0342221	sp|O43715|TRIA1_HUMAN	O43715	TRIA1_HUMAN	TRIAP1	TP53-regulated inhibitor of apoptosis 1
0.757819	1.81227	0.574879	0.0909132	-0.884419	-1.2299	-1.20659	-0.112889	0.197927	+	Cluster -2	102	1.31355	0.0274556	sp|Q9BW61|DDA1_HUMAN	Q9BW61	DDA1_HUMAN	DDA1	DET1- and DDB1-associated protein 1
1.32181	1.76481	0.266861	-0.155247	-0.513888	-1.48763	-0.610606	-0.19002	-0.396082	+	Cluster -2	189	1.66817	0.0158689	sp|Q6UW68|TM205_HUMAN	Q6UW68	TM205_HUMAN	TMEM205	Transmembrane protein 205
1.09154	1.958	0.34425	-0.462157	-0.954571	-1.01586	-0.762332	0.122584	-0.321449	+	Cluster -2	288	1.88661	0.0112275	sp|Q02878|RL6_HUMAN	Q02878	RL6_HUMAN	RPL6	60S ribosomal protein L6
0.721391	2.13075	-0.0140086	0.104381	-0.783806	-1.46454	-0.167365	-0.297983	-0.228824	+	Cluster -2	452	1.03236	0.0465513	sp|P41212|ETV6_HUMAN	P41212	ETV6_HUMAN	ETV6	Transcription factor ETV6
1.27449	1.2691	0.463724	0.467974	-0.586158	-1.80564	-0.737601	0.0752801	-0.421168	+	Cluster -2	475	1.13012	0.0377716	sp|Q7L3T8|SYPM_HUMAN	Q7L3T8	SYPM_HUMAN	PARS2	Probable proline--tRNA ligase, mitochondrial
1.0322	1.20213	0.643637	0.246155	-0.480923	-2.09673	-0.0941705	0.145249	-0.59754	+	Cluster -2	303	1.14287	0.0367087	sp|Q9Y6C9|MTCH2_HUMAN	Q9Y6C9	MTCH2_HUMAN	MTCH2	Mitochondrial carrier homolog 2
0.242196	2.41281	0.394114	-0.587883	-0.286145	-0.878999	-0.537165	-0.685808	-0.0731234	+	Cluster -2	310	1.14718	0.0363994	sp|Q6DCA0|AMERL_HUMAN	Q6DCA0	AMERL_HUMAN	AMMECR1L	AMMECR1-like protein
0.254043	2.43102	0.277488	-0.342827	-0.414432	-0.944692	-0.253874	-0.816153	-0.190572	+	Cluster -2	928	1.04792	0.0448876	sp|Q9H6U6|BCAS3_HUMAN	Q9H6U6	BCAS3_HUMAN	BCAS3	Breast carcinoma-amplified sequence 3
0.48791	2.39928	0.022683	0.138848	-0.355476	-0.596417	-0.671884	-0.848268	-0.576674	+	Cluster -2	2506	1.08018	0.0420927	sp|Q96JM2|ZN462_HUMAN	Q96JM2	ZN462_HUMAN	ZNF462	Zinc finger protein 462
0.523702	2.26905	0.182645	0.250804	-0.850391	-0.842103	-0.851693	-0.553901	-0.128109	+	Cluster -2	456	1.0505	0.0446332	sp|Q9H7H0|MET17_HUMAN	Q9H7H0	MET17_HUMAN	METTL17	Methyltransferase-like protein 17, mitochondrial
0.730417	1.98292	0.975103	-0.821498	-0.337168	-0.476545	-0.507645	-1.01356	-0.532021	+	Cluster -2	263	2.50629	0.00485634	sp|Q9NVZ3|NECP2_HUMAN	Q9NVZ3	NECP2_HUMAN	NECAP2	Adaptin ear-binding coat-associated protein 2
0.305522	2.31055	0.619312	-0.53801	-0.0755365	-0.691094	-0.308136	-0.823624	-0.798987	+	Cluster -2	964	1.41479	0.0231528	sp|Q96JG6|VPS50_HUMAN	Q96JG6	VPS50_HUMAN	VPS50	Syndetin
0.785409	2.08405	0.575358	-0.280073	-0.0285209	-0.644603	-0.520682	-1.00347	-0.967467	+	Cluster -2	276	2.03944	0.00936048	sp|Q6ICL3|TNG2_HUMAN	Q6ICL3	TNG2_HUMAN	TANGO2	Transport and Golgi organization protein 2 homolog
0.748091	2.12285	0.620605	-0.535818	-0.100435	-0.53121	-0.542119	-0.681495	-1.10047	+	Cluster -2	548	2.0321	0.0094133	sp|Q96FN4|CPNE2_HUMAN	Q96FN4	CPNE2_HUMAN	CPNE2	Copine-2
0.622428	2.20194	0.711997	-0.34523	-0.504641	-0.494327	-0.574153	-0.820738	-0.797274	+	Cluster -2	1114	2.07492	0.00890057	sp|Q9P278|FNIP2_HUMAN	Q9P278	FNIP2_HUMAN	FNIP2	Folliculin-interacting protein 2
0.482821	2.08868	0.594437	-0.24072	-0.525506	-0.364834	-0.793467	0.148587	-1.38999	+	Cluster -2	677	1.34369	0.0258503	sp|P16278|BGAL_HUMAN	P16278	BGAL_HUMAN	GLB1	Beta-galactosidase
0.75105	2.15971	0.532802	-0.483803	-0.714604	-0.643555	-0.35507	-0.16185	-1.08468	+	Cluster -2	482	1.76684	0.0133969	sp|Q9H0C5|BTBD1_HUMAN	Q9H0C5	BTBD1_HUMAN	BTBD1	BTB/POZ domain-containing protein 1
0.803334	2.01533	0.671128	-0.252925	-0.483887	-0.398713	-0.758353	-0.279762	-1.31615	+	Cluster -2	589	2.04649	0.00927796	sp|Q96S65|CSRN1_HUMAN	Q96S65	CSRN1_HUMAN	CSRNP1	Cysteine/serine-rich nuclear protein 1
0.607444	2.21131	0.600833	-0.226615	-0.596425	-0.434904	-0.566309	-0.488918	-1.10642	+	Cluster -2	689	1.79509	0.0129015	sp|Q96EY7|PTCD3_HUMAN	Q96EY7	PTCD3_HUMAN	PTCD3	Pentatricopeptide repeat domain-containing protein 3, mitochondrial
0.357502	2.3027	0.433047	-0.303043	-0.95669	-0.767723	-0.369384	0.102801	-0.799209	+	Cluster -2	728	1.25135	0.0303859	sp|Q9UJC3|HOOK1_HUMAN	Q9UJC3	HOOK1_HUMAN	HOOK1	Protein Hook homolog 1
1.03212	2.22505	-0.355651	-0.29881	-0.499789	-0.243159	-1.01735	-0.607432	-0.234973	+	Cluster -2	1044	1.01205	0.048673	sp|O00329|PK3CD_HUMAN	O00329	PK3CD_HUMAN	PIK3CD	Phosphatidylinositol 4,5-bisphosphate 3-kinase catalytic subunit delta isoform
0.795152	2.28318	0.227291	-0.396332	-0.357315	-0.510796	-0.373134	-0.717658	-0.950387	+	Cluster -2	238	1.5493	0.0185446	sp|Q86YN1|DOPP1_HUMAN	Q86YN1	DOPP1_HUMAN	DOLPP1	Dolichyldiphosphatase 1
0.787054	2.35697	-0.180558	-0.500444	-0.155014	-0.334698	-0.389347	-0.787001	-0.796967	+	Cluster -2	871	1.09664	0.0405865	sp|Q96DT7|ZBT10_HUMAN	Q96DT7	ZBT10_HUMAN	ZBTB10	Zinc finger and BTB domain-containing protein 10
0.974878	2.29053	-0.199577	-0.291164	-0.50498	-0.384831	-0.413024	-0.839919	-0.631916	+	Cluster -2	748	1.18661	0.034251	sp|Q8N264|RHG24_HUMAN	Q8N264	RHG24_HUMAN	ARHGAP24	Rho GTPase-activating protein 24
1.28899	2.10913	-0.103214	-0.388947	-0.591445	-0.464208	-0.541474	-0.735359	-0.573478	+	Cluster -2	347	1.49254	0.0203388	sp|P46734|MP2K3_HUMAN	P46734	MP2K3_HUMAN	MAP2K3	Dual specificity mitogen-activated protein kinase kinase 3
0.764959	2.33624	-0.0101473	-0.632307	-0.758671	-0.0909038	-0.28668	-0.751696	-0.570798	+	Cluster -2	142	1.18571	0.0342554	sp|Q14019|COTL1_HUMAN	Q14019	COTL1_HUMAN	COTL1	Coactosin-like protein
0.741455	2.43304	-0.192508	-0.593489	-0.476217	-0.463919	-0.485741	-0.477641	-0.484976	+	Cluster -2	236	1.0576	0.0440197	sp|Q5HYI8|RABL3_HUMAN	Q5HYI8	RABL3_HUMAN	RABL3	Rab-like protein 3
0.751636	2.35879	0.146678	-0.495935	-0.753906	-0.559254	-0.435422	-0.405619	-0.60697	+	Cluster -2	432	1.42784	0.022706	sp|P20248|CCNA2_HUMAN	P20248	CCNA2_HUMAN	CCNA2	Cyclin-A2
0.355446	2.47638	0.147146	-0.801498	-0.579406	-0.131665	-0.503782	-0.422133	-0.540485	+	Cluster -2	1302	1.054	0.0443301	sp|O95155|UBE4B_HUMAN	O95155	UBE4B_HUMAN	UBE4B	Ubiquitin conjugation factor E4 B
0.147686	2.37861	0.372156	-0.437438	-0.180988	-0.00920559	-0.790008	-0.396021	-1.08479	+	Cluster -2	1473	1.13434	0.0374329	sp|Q9C000|NLRP1_HUMAN	Q9C000	NLRP1_HUMAN	NLRP1	NACHT, LRR and PYD domains-containing protein 1
0.438503	2.26649	0.309851	-0.376336	0.0331298	-0.261104	-0.906262	-0.298777	-1.2055	+	Cluster -2	267	1.31688	0.0272559	sp|Q9BYD2|RM09_HUMAN	Q9BYD2	RM09_HUMAN	MRPL9	39S ribosomal protein L9, mitochondrial
0.878963	2.20756	0.105023	-0.373159	-0.185928	-0.245518	-0.861534	-0.443892	-1.08152	+	Cluster -2	476	1.52083	0.0193115	sp|P61619|S61A1_HUMAN	P61619	S61A1_HUMAN	SEC61A1	Protein transport protein Sec61 subunit alpha isoform 1
0.97042	2.19211	-0.0871436	-0.437103	-0.468962	-0.0686508	-0.734014	-0.260829	-1.10583	+	Cluster -2	285	1.25223	0.0303346	sp|Q9NPL8|TIDC1_HUMAN	Q9NPL8	TIDC1_HUMAN	TIMMDC1	Complex I assembly factor TIMMDC1, mitochondrial
0.790693	2.20978	0.159333	-0.108877	-0.290948	-0.440253	-1.20048	-0.326794	-0.792456	+	Cluster -2	707	1.44303	0.0221599	sp|Q9H078|CLPB_HUMAN	Q9H078	CLPB_HUMAN	CLPB	Caseinolytic peptidase B protein homolog
0.909336	2.21319	0.146362	-0.568385	-0.265794	-0.350454	-1.12227	-0.395052	-0.566928	+	Cluster -2	430	1.50387	0.0198885	sp|P82675|RT05_HUMAN	P82675	RT05_HUMAN	MRPS5	28S ribosomal protein S5, mitochondrial
0.581907	2.37143	0.146522	-0.607013	-0.183598	-0.75231	-0.531475	-0.166424	-0.859036	+	Cluster -2	467	1.19569	0.03354	sp|Q9BTY2|FUCO2_HUMAN	Q9BTY2	FUCO2_HUMAN	FUCA2	Plasma alpha-L-fucosidase
0.737057	1.97273	0.166672	-0.376783	-0.0182052	-0.33538	0.339505	-1.44047	-1.04513	+	Cluster -2	414	1.06634	0.0432725	sp|Q9UEE5|ST17A_HUMAN	Q9UEE5	ST17A_HUMAN	STK17A	Serine/threonine-protein kinase 17A
0.803215	2.21723	-0.142851	-0.0589213	-0.538959	-0.327432	0.0481697	-1.08383	-0.916621	+	Cluster -2	621	1.01032	0.0488774	sp|Q9UKA2|FBXL4_HUMAN	Q9UKA2	FBXL4_HUMAN	FBXL4	F-box/LRR-repeat protein 4
0.799863	2.0322	0.215046	-0.306808	-0.384187	0.217842	-0.186004	-1.12627	-1.26168	+	Cluster -2	223	1.45338	0.0218139	sp|O15318|RPC7_HUMAN	O15318	RPC7_HUMAN	POLR3G	DNA-directed RNA polymerase III subunit RPC7
0.600124	2.17994	0.0452458	-0.384873	-0.554381	0.38763	-0.298092	-1.33393	-0.641665	+	Cluster -2	785	1.07165	0.0428163	sp|P08047|SP1_HUMAN	P08047	SP1_HUMAN	SP1	Transcription factor Sp1
0.835136	2.19854	0.155945	-0.719993	-0.752761	-0.411633	0.0194934	-1.05754	-0.267184	+	Cluster -2	2157	1.34142	0.02594	sp|P48634|PRC2A_HUMAN	P48634	PRC2A_HUMAN	PRRC2A	Protein PRRC2A
0.473416	2.26954	0.33944	-0.779111	-0.586856	-0.222291	-0.227586	-1.20562	-0.0609305	+	Cluster -2	415	1.17444	0.0348372	sp|Q99519|NEUR1_HUMAN	Q99519	NEUR1_HUMAN	NEU1	Sialidase-1
0.960391	2.05994	0.241005	-0.444421	-0.467385	-0.801341	-0.0111071	-1.28655	-0.25054	+	Cluster -2	489	1.42618	0.022739	sp|Q9BQC3|DPH2_HUMAN	Q9BQC3	DPH2_HUMAN	DPH2	2-(3-amino-3-carboxypropyl)histidine synthase subunit 2
1.34503	1.79299	0.104172	-0.227283	-0.811671	-1.00388	0.183894	-1.04973	-0.33353	+	Cluster -2	174	1.45163	0.0219086	sp|O43598|DNPH1_HUMAN	O43598	DNPH1_HUMAN	DNPH1	2'-deoxynucleoside 5'-phosphate N-hydrolase 1
0.890899	2.19275	0.31287	-0.612963	-0.412863	-0.266931	-0.776505	-0.979106	-0.348153	+	Cluster -2	968	1.72891	0.0143596	sp|P19838|NFKB1_HUMAN	P19838	NFKB1_HUMAN	NFKB1	Nuclear factor NF-kappa-B p105 subunit
0.7456	2.12192	0.616287	-0.653425	-0.498412	0.0165905	-0.905023	-0.609726	-0.833811	+	Cluster -2	483	2.02855	0.00944469	sp|P17544|ATF7_HUMAN	P17544	ATF7_HUMAN	ATF7	Cyclic AMP-dependent transcription factor ATF-7
1.17014	1.78003	0.702013	-0.904518	-0.87795	-0.0862512	-1.00637	-0.559325	-0.217767	+	Cluster -2	433	2.33814	0.0061696	sp|Q99538|LGMN_HUMAN	Q99538	LGMN_HUMAN	LGMN	Legumain
0.818882	1.99722	0.620583	-1.03219	-0.73978	0.169025	-0.969634	-0.449535	-0.414576	+	Cluster -2	380	1.75151	0.0139133	sp|Q96DV4|RM38_HUMAN	Q96DV4	RM38_HUMAN	MRPL38	39S ribosomal protein L38, mitochondrial
1.00584	1.82832	0.811386	-0.793158	-0.326086	-0.0376095	-1.00765	-1.00341	-0.477635	+	Cluster -2	325	2.63415	0.00439468	sp|Q6IAN0|DRS7B_HUMAN	Q6IAN0	DRS7B_HUMAN	DHRS7B	Dehydrogenase/reductase SDR family member 7B
1.39746	1.75078	0.548942	-0.9343	-0.464368	-0.196656	-0.866787	-0.757694	-0.477377	+	Cluster -2	892	2.55852	0.00446123	sp|O15265|ATX7_HUMAN	O15265	ATX7_HUMAN	ATXN7	Ataxin-7
1.43874	1.47613	0.727517	-1.15287	-0.480914	0.110445	-0.869073	-0.862369	-0.387605	+	Cluster -2	398	2.36008	0.00594815	sp|P05423|RPC4_HUMAN	P05423	RPC4_HUMAN	POLR3D	DNA-directed RNA polymerase III subunit RPC4
0.867027	1.79665	0.952797	-0.742733	-1.16745	-0.0104434	-0.319886	-0.415178	-0.960779	+	Cluster -2	268	2.22324	0.00719089	sp|Q96D70|R3HD4_HUMAN	Q96D70	R3HD4_HUMAN	R3HDM4	R3H domain-containing protein 4
1.11468	1.75586	0.601639	-0.924477	-1.25524	0.0915826	-0.111922	-0.474615	-0.797504	+	Cluster -2	758	1.88032	0.0112574	sp|Q8WUQ7|CATIN_HUMAN	Q8WUQ7	CATIN_HUMAN	CACTIN	Cactin
0.645492	2.1332	0.557778	-1.04723	-0.358345	0.0391659	-0.352374	-0.632174	-0.985514	+	Cluster -2	238	1.58324	0.0176861	sp|O14817|TSN4_HUMAN	O14817	TSN4_HUMAN	TSPAN4	Tetraspanin-4
0.796656	1.94974	0.641333	-1.08304	-0.764442	0.252752	-0.326585	-0.45985	-1.00657	+	Cluster -2	290	1.64978	0.0163113	sp|Q9NZQ7|PD1L1_HUMAN	Q9NZQ7	PD1L1_HUMAN	CD274	Programmed cell death 1 ligand 1
0.922181	2.0425	0.353219	-0.997073	-0.27032	-0.238615	0.00559358	-0.712307	-1.10518	+	Cluster -2	247	1.52583	0.019222	sp|P07477|TRY1_HUMAN	P07477	TRY1_HUMAN	PRSS1	Trypsin-1
1.10301	1.97475	0.258999	-0.993006	-0.542036	-0.0202822	-0.0617799	-0.695571	-1.02408	+	Cluster -2	493	1.5554	0.0183855	sp|Q15048|LRC14_HUMAN	Q15048	LRC14_HUMAN	LRRC14	Leucine-rich repeat-containing protein 14
0.828365	2.04141	0.371935	-1.13219	-0.234408	0.301558	-0.749727	-0.723995	-0.702944	+	Cluster -2	389	1.49491	0.0202936	sp|Q9NZJ7|MTCH1_HUMAN	Q9NZJ7	MTCH1_HUMAN	MTCH1	Mitochondrial carrier homolog 1
0.707701	2.01354	0.385159	-1.218	-0.49918	0.4623	-0.295575	-0.939476	-0.616468	+	Cluster -2	1066	1.22856	0.0317392	sp|Q96DN5|TBC31_HUMAN	Q96DN5	TBC31_HUMAN	TBC1D31	TBC1 domain family member 31
1.24109	2.01249	-0.36191	-0.98578	-0.700405	-0.434893	-0.250722	-0.723161	0.203296	+	Cluster -2	461	1.07143	0.0428408	sp|Q9H237|PORCN_HUMAN	Q9H237	PORCN_HUMAN	PORCN	Protein-serine O-palmitoleoyltransferase porcupine
1.55741	1.78558	-0.523586	-1.19477	-0.663932	-0.281143	-0.291611	-0.241047	-0.146907	+	Cluster -2	860	1.01524	0.0482185	sp|Q58WW2|DCAF6_HUMAN	Q58WW2	DCAF6_HUMAN	DCAF6	DDB1- and CUL4-associated factor 6
0.708211	2.03956	0.611014	-1.482	-0.522638	-0.368742	-0.408879	-0.173197	-0.403334	+	Cluster -2	274	1.78153	0.0130949	sp|Q70HW3|SAMC_HUMAN	Q70HW3	SAMC_HUMAN	SLC25A26	S-adenosylmethionine mitochondrial carrier protein
0.650107	1.9788	0.62617	-1.64315	-0.456277	-0.406424	-0.286704	-0.291068	-0.171458	+	Cluster -2	971	1.68916	0.015316	sp|O95980|RECK_HUMAN	O95980	RECK_HUMAN	RECK	Reversion-inducing cysteine-rich protein with Kazal motifs
0.884085	2.13096	0.0226493	-1.2717	-0.818474	-0.0902892	-0.48705	-0.379842	0.00966362	+	Cluster -2	235	1.23755	0.0311325	sp|Q8N9Z2|CC71L_HUMAN	Q8N9Z2	CC71L_HUMAN	CCDC71L	Coiled-coil domain-containing protein 71L
1.31335	1.82625	0.377403	-1.29932	-0.571229	-0.286232	-0.670179	-0.261956	-0.42809	+	Cluster -2	646	2.01059	0.00963144	sp|Q96FN5|KIF12_HUMAN	Q96FN5	KIF12_HUMAN	KIF12	Kinesin-like protein KIF12
1.35717	1.66319	0.231033	-1.18682	-1.20017	-0.190963	-0.4295	0.22363	-0.467557	+	Cluster -2	307	1.73661	0.0142606	sp|Q96IW7|SC22A_HUMAN	Q96IW7	SC22A_HUMAN	SEC22A	Vesicle-trafficking protein SEC22a
1.11358	1.99248	0.128903	-1.19809	-0.988891	-0.396743	-0.299132	-0.0161229	-0.335983	+	Cluster -2	301	1.71493	0.0147324	sp|O75880|SCO1_HUMAN	O75880	SCO1_HUMAN	SCO1	Protein SCO1 homolog, mitochondrial
1.23143	2.10603	-0.379056	-0.766573	-0.871046	-0.418251	-0.36328	-0.0395495	-0.499704	+	Cluster -2	1204	1.11398	0.0390663	sp|Q9HAV4|XPO5_HUMAN	Q9HAV4	XPO5_HUMAN	XPO5	Exportin-5
1.27183	2.08481	-0.154653	-0.533273	-1.00393	-0.447761	-0.369096	-0.315241	-0.532688	+	Cluster -2	333	1.37931	0.0245342	sp|Q8N8Q8|COX18_HUMAN	Q8N8Q8	COX18_HUMAN	COX18	Cytochrome c oxidase assembly protein COX18, mitochondrial
1.31855	1.99719	-0.23749	-0.935947	-0.741262	-0.00517378	-0.178289	-0.514548	-0.703022	+	Cluster -2	235	1.17421	0.0348604	sp|Q9NQT4|EXOS5_HUMAN	Q9NQT4	EXOS5_HUMAN	EXOSC5	Exosome complex component RRP46
1.48908	1.88538	-0.129223	-0.650516	-0.958127	-0.0713158	-0.513447	-0.370691	-0.681146	+	Cluster -2	603	1.39982	0.0237268	sp|Q8N6Q8|MET25_HUMAN	Q8N6Q8	MET25_HUMAN	METTL25	Methyltransferase-like protein 25
1.4619	1.89086	-0.304832	-0.639858	-1.05648	-0.0431726	-0.332718	-0.68842	-0.287277	+	Cluster -2	848	1.14425	0.0366021	sp|P35869|AHR_HUMAN	P35869	AHR_HUMAN	AHR	Aryl hydrocarbon receptor
1.39618	1.96222	-0.0421327	-0.674112	-0.92505	-0.194393	-0.313469	-0.707758	-0.501484	+	Cluster -2	546	1.52122	0.0193144	sp|Q5VTL8|PR38B_HUMAN	Q5VTL8	PR38B_HUMAN	PRPF38B	Pre-mRNA-splicing factor 38B
0.915386	2.15652	0.133259	-0.613146	-0.93712	-0.11037	-0.45175	-0.0847295	-1.00805	+	Cluster -2	1817	1.33962	0.0260124	sp|P52948|NUP98_HUMAN	P52948	NUP98_HUMAN	NUP98	Nuclear pore complex protein Nup98-Nup96
1.20167	1.93183	0.316682	-0.704762	-0.891066	-0.121273	-0.531883	-0.145639	-1.05556	+	Cluster -2	292	1.77524	0.0132011	sp|Q92564|DCNL4_HUMAN	Q92564	DCNL4_HUMAN	DCUN1D4	DCN1-like protein 4
1.16863	1.92565	0.0879072	-0.991042	-0.721876	-0.016474	-0.914607	0.196516	-0.734702	+	Cluster -2	416	1.3113	0.0275652	sp|P49674|KC1E_HUMAN	P49674	KC1E_HUMAN	CSNK1E	Casein kinase I isoform epsilon
1.07166	2.06777	0.215142	-0.646297	-0.93509	-0.197312	-0.961458	-0.100527	-0.513882	+	Cluster -2	223	1.5869	0.0176163	sp|Q9UBS3|DNJB9_HUMAN	Q9UBS3	DNJB9_HUMAN	DNAJB9	DnaJ homolog subfamily B member 9
1.05263	2.13324	0.0341766	-0.643523	-0.802762	0.143201	-0.682401	-0.488257	-0.746306	+	Cluster -2	773	1.38993	0.024201	sp|Q96TA2|YMEL1_HUMAN	Q96TA2	YMEL1_HUMAN	YME1L1	ATP-dependent zinc metalloprotease YME1L1
0.917931	2.10757	0.214669	-0.808143	-1.01078	0.139887	-0.812336	-0.506517	-0.242282	+	Cluster -2	615	1.39206	0.0241167	sp|O00255|MEN1_HUMAN	O00255	MEN1_HUMAN	MEN1	Menin
2.16676	0.618757	-0.00743754	-1.25802	-0.89029	-0.50625	0.346847	-0.0622785	-0.408082	+	Cluster -2	1087	1.2464	0.0306195	sp|Q9UIA9|XPO7_HUMAN	Q9UIA9	XPO7_HUMAN	XPO7	Exportin-7
1.84177	0.95849	0.236313	-1.57851	-0.787299	-0.250842	0.369435	-0.468396	-0.320958	+	Cluster -2	105	1.47171	0.0209808	sp|Q53QV2|LBH_HUMAN	Q53QV2	LBH_HUMAN	LBH	Protein LBH
1.76912	1.17212	0.283134	-1.30354	-0.740438	-0.596712	0.486058	-0.58087	-0.488869	+	Cluster -2	87	1.74479	0.0140467	sp|P82921|RT21_HUMAN	P82921	RT21_HUMAN	MRPS21	28S ribosomal protein S21, mitochondrial
1.58504	1.43674	0.239292	-1.28793	-0.515964	-0.972167	0.322413	-0.221827	-0.585597	+	Cluster -2	654	1.93775	0.0106341	sp|Q96IV0|NGLY1_HUMAN	Q96IV0	NGLY1_HUMAN	NGLY1	Peptide-N(4)-(N-acetyl-beta-glucosaminyl)asparagine amidase
1.49505	1.61701	-0.0642563	-1.02079	-1.07278	-0.562855	0.436777	-0.187542	-0.640605	+	Cluster -2	1608	1.51525	0.0195688	sp|Q96RK0|CIC_HUMAN	Q96RK0	CIC_HUMAN	CIC	Protein capicua homolog
1.3831	1.76588	-0.155053	-1.15661	-0.748879	-0.692644	0.335606	-0.0605654	-0.670835	+	Cluster -2	314	1.41045	0.0233521	sp|Q02978|M2OM_HUMAN	Q02978	M2OM_HUMAN	SLC25A11	Mitochondrial 2-oxoglutarate/malate carrier protein
1.65728	1.35898	-0.0194341	-0.898809	-1.25255	-0.701717	0.537053	-0.248526	-0.432276	+	Cluster -2	559	1.63199	0.0168145	sp|Q5QP82|DCA10_HUMAN	Q5QP82	DCA10_HUMAN	DCAF10	DDB1- and CUL4-associated factor 10
1.85987	1.23488	0.178174	-0.920212	-1.16527	-0.819015	0.0816035	-0.245574	-0.204456	+	Cluster -2	340	2.11988	0.00849758	sp|Q96IZ0|PAWR_HUMAN	Q96IZ0	PAWR_HUMAN	PAWR	PRKC apoptosis WT1 regulator protein
1.7223	1.23871	0.0600379	-1.20524	-1.10713	-0.799065	0.338186	0.00605308	-0.25385	+	Cluster -2	228	1.99661	0.00973486	sp|P52803|EFNA5_HUMAN	P52803	EFNA5_HUMAN	EFNA5	Ephrin-A5
1.10202	1.57729	0.416349	-0.906959	-1.34734	-0.991909	0.548158	0.049237	-0.446847	+	Cluster -2	379	2.3821	0.0059435	sp|Q9H300|PARL_HUMAN	Q9H300	PARL_HUMAN	PARL	Presenilins-associated rhomboid-like protein, mitochondrial
1.25975	1.26912	0.489501	-1.11197	-1.52766	-0.656734	0.585234	0.139214	-0.446457	+	Cluster -2	4377	2.35214	0.00601558	sp|Q12955|ANK3_HUMAN	Q12955	ANK3_HUMAN	ANK3	Ankyrin-3
1.12296	1.03404	0.823535	-1.27034	-1.33697	-0.765925	0.74744	0.259684	-0.614421	+	Cluster -2	384	2.47772	0.00498467	sp|Q16690|DUS5_HUMAN	Q16690	DUS5_HUMAN	DUSP5	Dual specificity protein phosphatase 5
1.88391	0.977957	-0.1485	-1.43588	-1.1017	0.0613315	0.0774205	0.105134	-0.419683	+	Cluster -2	747	1.08333	0.0417734	sp|Q96EB6|SIR1_HUMAN	Q96EB6	SIR1_HUMAN	SIRT1	NAD-dependent protein deacetylase sirtuin-1
1.5955	1.00308	-0.0114044	-1.41039	-1.28335	-0.153212	0.0392065	0.727753	-0.507181	+	Cluster -2	280	1.25867	0.0299792	sp|Q13643|FHL3_HUMAN	Q13643	FHL3_HUMAN	FHL3	Four and a half LIM domains protein 3
1.44395	1.29827	-0.14206	-1.84932	-0.61731	-0.519383	0.221604	0.276967	-0.112719	+	Cluster -2	493	1.40332	0.0235897	sp|Q96DC7|TMCO6_HUMAN	Q96DC7	TMCO6_HUMAN	TMCO6	Transmembrane and coiled-coil domain-containing protein 6
1.76306	1.02203	0.106925	-1.86277	-0.394505	0.00647073	-0.0830758	-0.125062	-0.433068	+	Cluster -2	323	1.12007	0.038476	sp|P36873|PP1G_HUMAN	P36873	PP1G_HUMAN	PPP1CC	Serine/threonine-protein phosphatase PP1-gamma catalytic subunit
2.16456	0.947627	-0.239277	-0.704134	-0.963758	-0.833309	-0.173836	0.209759	-0.407634	+	Cluster -2	726	1.22789	0.0317663	sp|Q8NBF2|NHLC2_HUMAN	Q8NBF2	NHLC2_HUMAN	NHLRC2	NHL repeat-containing protein 2
1.97267	1.1541	-0.417837	-0.58755	-0.840126	-0.968925	0.0566932	0.335526	-0.704554	+	Cluster -2	193	1.0379	0.045979	sp|Q14116|IL18_HUMAN	Q14116	IL18_HUMAN	IL18	Interleukin-18
1.84803	1.45974	-0.0948618	-0.9434	-0.766976	-0.740592	-0.440964	0.132983	-0.453958	+	Cluster -2	187	1.5888	0.0176179	sp|Q9Y2Q9|RT28_HUMAN	Q9Y2Q9	RT28_HUMAN	MRPS28	28S ribosomal protein S28, mitochondrial
2.14416	1.10236	-0.285482	-0.868461	-0.823248	-0.436347	-0.337729	0.103681	-0.598928	+	Cluster -2	2012	1.13936	0.0370217	sp|Q92621|NU205_HUMAN	Q92621	NU205_HUMAN	NUP205	Nuclear pore complex protein Nup205
1.99605	1.39192	-0.282136	-0.923485	-0.650669	-0.373734	-0.370388	-0.133429	-0.654128	+	Cluster -2	1972	1.24663	0.0306061	sp|Q12888|TP53B_HUMAN	Q12888	TP53B_HUMAN	TP53BP1	TP53-binding protein 1
1.81918	1.50549	-0.336762	-0.379259	-0.569022	-1.28524	-0.237822	-0.23343	-0.283134	+	Cluster -2	80	1.20545	0.0330961	sp|P24311|COX7B_HUMAN	P24311	COX7B_HUMAN	COX7B	Cytochrome c oxidase subunit 7B, mitochondrial
1.85025	1.50622	-0.168818	-0.366283	-0.550926	-0.961822	-0.509994	0.0115349	-0.810162	+	Cluster -2	195	1.3378	0.0261311	sp|Q3MHD2|LSM12_HUMAN	Q3MHD2	LSM12_HUMAN	LSM12	Protein LSM12 homolog
1.7022	1.68791	-0.539129	-0.521429	-0.839245	-0.78355	-0.41605	0.135074	-0.425784	+	Cluster -2	128	1.04342	0.0454728	sp|O60783|RT14_HUMAN	O60783	RT14_HUMAN	MRPS14	28S ribosomal protein S14, mitochondrial
0.789487	1.82797	0.352588	-0.647916	-0.743915	-1.16353	0.788455	-0.256247	-0.946892	+	Cluster -2	2715	1.3559	0.0252764	sp|Q9UMN6|KMT2B_HUMAN	Q9UMN6	KMT2B_HUMAN	KMT2B	Histone-lysine N-methyltransferase 2B
0.724608	1.88716	0.24432	-0.251167	-1.31298	-1.0003	0.73445	-0.527671	-0.498419	+	Cluster -2	455	1.25192	0.0303409	sp|Q5TFE4|NT5D1_HUMAN	Q5TFE4	NT5D1_HUMAN	NT5DC1	5'-nucleotidase domain-containing protein 1
0.319205	1.79045	0.615168	-0.0711731	-1.10111	-1.68447	0.406895	-0.304292	0.0293276	+	Cluster -2	2151	1.36828	0.024884	sp|Q5THK1|PR14L_HUMAN	Q5THK1	PR14L_HUMAN	PRR14L	Protein PRR14L
1.24825	1.92382	-0.17461	-0.614246	-1.01938	-0.702236	0.43146	-0.639169	-0.453899	+	Cluster -2	624	1.26047	0.0299241	sp|Q9UHD9|UBQL2_HUMAN	Q9UHD9	UBQL2_HUMAN	UBQLN2	Ubiquilin-2
1.80933	1.6059	-0.253734	-0.111577	-0.907753	-0.605128	-0.2654	-0.662188	-0.609456	+	Cluster -2	471	1.27739	0.0292559	sp|Q96K21|ANCHR_HUMAN	Q96K21	ANCHR_HUMAN	ZFYVE19	Abscission/NoCut checkpoint regulator
1.53341	1.80608	-0.408997	-0.180253	-0.935558	-0.741346	0.138761	-0.541793	-0.670302	+	Cluster -2	385	1.03902	0.0459053	sp|Q01459|DIAC_HUMAN	Q01459	DIAC_HUMAN	CTBS	Di-N-acetylchitobiase
1.61635	1.45981	0.115328	-0.169364	-0.44739	-1.51848	-0.0399716	-0.199579	-0.816709	+	Cluster -2	985	1.40884	0.0233897	sp|Q8TB24|RIN3_HUMAN	Q8TB24	RIN3_HUMAN	RIN3	Ras and Rab interactor 3
1.62946	1.47547	0.303219	-0.0459879	-0.737756	-1.25615	0.00376213	-0.613903	-0.758106	+	Cluster -2	477	1.73205	0.0143375	sp|P50336|PPOX_HUMAN	P50336	PPOX_HUMAN	PPOX	Protoporphyrinogen oxidase
1.40173	1.66125	0.406791	-0.23292	-0.846292	-0.602346	0.181232	-0.93771	-1.03174	+	Cluster -2	118	1.8203	0.0123214	sp|O15155|BET1_HUMAN	O15155	BET1_HUMAN	BET1	BET1 homolog
1.45317	1.56959	0.556042	-0.611626	-0.652334	-0.243655	-0.109982	-0.579818	-1.38139	+	Cluster -2	2590	2.14404	0.00820322	sp|O75417|DPOLQ_HUMAN	O75417	DPOLQ_HUMAN	POLQ	DNA polymerase theta
1.38623	1.56972	0.621174	-0.861764	-0.809883	-0.452457	0.252574	-0.621562	-1.08402	+	Cluster -2	508	2.15771	0.00802513	sp|Q6NXR4|TTI2_HUMAN	Q6NXR4	TTI2_HUMAN	TTI2	TELO2-interacting protein 2
1.37261	1.45578	0.868603	-0.227302	-1.10568	-0.677742	0.00654759	-0.651746	-1.04107	+	Cluster -2	854	2.52879	0.00455438	sp|Q5JQC9|AKAP4_HUMAN	Q5JQC9	AKAP4_HUMAN	AKAP4	A-kinase anchor protein 4
1.29944	1.28191	1.07352	-0.179934	-1.41109	-0.81405	0.031919	-0.581439	-0.700274	+	Cluster -2	416	2.58686	0.00445929	sp|P55211|CASP9_HUMAN	P55211	CASP9_HUMAN	CASP9	Caspase-9
1.22752	1.78092	0.586643	-0.414458	-1.11208	-0.978852	0.0072192	-0.481228	-0.615688	+	Cluster -2	457	2.46778	0.00498407	sp|O95429|BAG4_HUMAN	O95429	BAG4_HUMAN	BAG4	BAG family molecular chaperone regulator 4
1.65829	1.40837	0.657216	-0.496928	-0.884927	-1.06481	-0.14321	-0.62742	-0.506582	+	Cluster -2	496	2.93885	0.00320129	sp|Q9UM11|FZR1_HUMAN	Q9UM11	FZR1_HUMAN	FZR1	Fizzy-related protein homolog
1.57752	1.51634	0.524574	-0.683932	-0.968159	-0.939598	0.102481	-0.542733	-0.58649	+	Cluster -2	315	2.65155	0.00435868	sp|Q9H0W9|CK054_HUMAN	Q9H0W9	CK054_HUMAN	C11orf54	Ester hydrolase C11orf54
1.59651	1.4883	0.623142	-0.382721	-0.91212	-0.875746	-0.207495	-0.960834	-0.369036	+	Cluster -2	102	2.63493	0.00440444	sp|P20962|PTMS_HUMAN	P20962	PTMS_HUMAN	PTMS	Parathymosin
0.663099	2.19304	0.00688559	-0.610008	-0.665721	-0.843971	0.157454	0.179197	-1.07998	+	Cluster -2	522	1.04551	0.0451662	sp|P34059|GALNS_HUMAN	P34059	GALNS_HUMAN	GALNS	N-acetylgalactosamine-6-sulfatase
1.04738	2.10874	-0.152391	-0.179985	-0.893508	-1.00826	-0.0925335	-0.0733363	-0.756109	+	Cluster -2	303	1.16777	0.0352435	sp|Q9UBR2|CATZ_HUMAN	Q9UBR2	CATZ_HUMAN	CTSZ	Cathepsin Z
1.08592	2.13425	-0.07427	-0.958942	-0.418483	-0.883236	-0.0686073	-0.25454	-0.562091	+	Cluster -2	224	1.39775	0.0238613	sp|O43760|SNG2_HUMAN	O43760	SNG2_HUMAN	SYNGR2	Synaptogyrin-2
1.07766	2.00444	0.489277	-1.01182	-0.728954	-0.763617	-0.251891	-0.253311	-0.561786	+	Cluster -2	1150	2.38939	0.0059026	sp|Q8IX12|CCAR1_HUMAN	Q8IX12	CCAR1_HUMAN	CCAR1	Cell division cycle and apoptosis regulator protein 1
1.20823	1.9699	0.175555	-0.817364	-0.784254	-1.01342	-0.032865	-0.167713	-0.538066	+	Cluster -2	302	1.95099	0.0104846	sp|Q9UMR5|PPT2_HUMAN	Q9UMR5	PPT2_HUMAN	PPT2	Lysosomal thioesterase PPT2
1.20688	1.84059	0.587356	-1.09801	-0.280028	-0.729038	-0.147338	-0.588583	-0.79183	+	Cluster -2	467	2.32983	0.00623333	sp|P49768|PSN1_HUMAN	P49768	PSN1_HUMAN	PSEN1	Presenilin-1
1.19277	1.68442	0.736835	-0.922865	-0.474088	-1.32739	-0.086279	-0.282303	-0.521098	+	Cluster -2	294	2.83444	0.00394894	sp|O95858|TSN15_HUMAN	O95858	TSN15_HUMAN	TSPAN15	Tetraspanin-15
1.15938	1.69728	0.227891	-0.42152	-1.75767	-0.31436	-0.107691	0.0966284	-0.579934	+	Cluster -2	1135	1.4447	0.0221086	sp|Q9H9Y6|RPA2_HUMAN	Q9H9Y6	RPA2_HUMAN	POLR1B	DNA-directed RNA polymerase I subunit RPA2
1.06386	1.78564	-0.194474	-0.21776	-1.61846	-0.908996	0.269063	0.0843461	-0.263219	+	Cluster -2	347	1.22034	0.0323408	sp|P17275|JUNB_HUMAN	P17275	JUNB_HUMAN	JUNB	Transcription factor jun-B
1.31445	1.91864	-0.00357334	-0.743527	-1.26113	-0.381526	-0.0998253	-0.460681	-0.282834	+	Cluster -2	497	1.57496	0.0178678	sp|Q15173|2A5B_HUMAN	Q15173	2A5B_HUMAN	PPP2R5B	Serine/threonine-protein phosphatase 2A 56 kDa regulatory subunit beta isoform
1.1062	1.80753	0.371034	-1.01548	-1.37691	-0.57402	0.0798257	-0.320058	-0.0781151	+	Cluster -2	412	2.23738	0.0070742	sp|P57081|WDR4_HUMAN	P57081	WDR4_HUMAN	WDR4	tRNA (guanine-N(7)-)-methyltransferase non-catalytic subunit WDR4
1.14483	2.02298	-0.0741078	-0.949059	-1.07846	-0.558178	-0.378203	-0.244633	0.114829	+	Cluster -2	386	1.51804	0.0194126	sp|Q6NVY1|HIBCH_HUMAN	Q6NVY1	HIBCH_HUMAN	HIBCH	3-hydroxyisobutyryl-CoA hydrolase, mitochondrial
1.42325	1.74024	-0.0584619	-0.658051	-1.34825	-0.784037	-0.276034	-0.0151584	-0.0235006	+	Cluster -2	718	1.70716	0.0149721	sp|Q9BW92|SYTM_HUMAN	Q9BW92	SYTM_HUMAN	TARS2	Threonine--tRNA ligase, mitochondrial
1.10331	1.61047	0.714014	-0.39473	-1.5337	-1.00822	-0.128728	-0.371571	0.0091579	+	Cluster -2	1129	2.55192	0.00446989	sp|Q9UPZ3|HPS5_HUMAN	Q9UPZ3	HPS5_HUMAN	HPS5	Hermansky-Pudlak syndrome 5 protein
1.23716	1.73137	0.602308	-0.831447	-1.24949	-0.784283	-0.267077	-0.0270607	-0.41148	+	Cluster -2	563	2.92526	0.00345741	sp|O14773|TPP1_HUMAN	O14773	TPP1_HUMAN	TPP1	Tripeptidyl-peptidase 1
0.991776	1.72292	-0.0909285	-0.341285	-0.718334	-1.71624	-0.155879	0.595549	-0.287578	+	Cluster -2	350	1.22301	0.0320937	sp|Q9Y3F4|STRAP_HUMAN	Q9Y3F4	STRAP_HUMAN	STRAP	Serine-threonine kinase receptor-associated protein
1.58797	1.08888	-0.17016	-0.352789	-0.627131	-1.68962	-0.0351841	0.758697	-0.560658	+	Cluster -2	376	1.0692	0.0430145	sp|Q8NCH0|CHSTE_HUMAN	Q8NCH0	CHSTE_HUMAN	CHST14	Carbohydrate sulfotransferase 14
1.26441	1.07832	-0.140348	-0.567813	-0.848461	-1.57637	-0.223687	1.2578	-0.243845	+	Cluster -2	545	1.19802	0.0334992	sp|P51687|SUOX_HUMAN	P51687	SUOX_HUMAN	SUOX	Sulfite oxidase, mitochondrial
1.39976	1.63592	0.320736	-0.850842	-0.59404	-1.14157	-0.0662376	0.209201	-0.912919	+	Cluster -2	528	1.93099	0.010628	sp|Q96I34|PP16A_HUMAN	Q96I34	PP16A_HUMAN	PPP1R16A	Protein phosphatase 1 regulatory subunit 16A
1.45032	1.37585	-0.0948915	-0.70406	-0.982041	-1.02589	0.216089	0.721251	-0.95663	+	Cluster -2	452	1.25142	0.0303835	sp|P49411|EFTU_HUMAN	P49411	EFTU_HUMAN	TUFM	Elongation factor Tu, mitochondrial
1.16897	1.68566	0.125592	-1.05432	-1.02506	-0.787413	0.0498139	0.617703	-0.780951	+	Cluster -2	1143	1.62656	0.0168119	sp|Q14147|DHX34_HUMAN	Q14147	DHX34_HUMAN	DHX34	Probable ATP-dependent RNA helicase DHX34
1.27627	1.58707	-0.526083	-1.23013	-0.961715	-0.531216	0.351909	0.621459	-0.587568	+	Cluster -2	1058	1.01962	0.0476652	sp|P57678|GEMI4_HUMAN	P57678	GEMI4_HUMAN	GEMIN4	Gem-associated protein 4
0.802485	1.77736	0.196387	-0.640304	-0.81566	-1.07544	-0.471383	1.02944	-0.802879	+	Cluster -2	82	1.1637	0.0354937	sp|Q9Y5U9|IR3IP_HUMAN	Q9Y5U9	IR3IP_HUMAN	IER3IP1	Immediate early response 3-interacting protein 1
0.76171	2.05235	0.15768	-1.19926	-0.23135	-0.746772	-0.448357	0.4875	-0.833498	+	Cluster -2	418	1.16738	0.0352578	sp|Q96AG3|S2546_HUMAN	Q96AG3	S2546_HUMAN	SLC25A46	Solute carrier family 25 member 46
0.647307	2.20796	-0.261835	-1.00247	-0.89771	-0.618922	-0.334818	0.515868	-0.255386	+	Cluster -2	279	1.02564	0.0470328	sp|O00165|HAX1_HUMAN	O00165	HAX1_HUMAN	HAX1	HCLS1-associated protein X-1
0.987223	0.499007	1.62718	-1.79042	-0.0945913	-0.537375	0.269414	-0.694146	-0.266286	+	Cluster -2	370	1.4377	0.0222526	sp|Q15035|TRAM2_HUMAN	Q15035	TRAM2_HUMAN	TRAM2	Translocating chain-associated membrane protein 2
1.01532	0.848316	1.26917	-1.69272	-0.272552	-0.675372	0.132892	-1.03016	0.405102	+	Cluster -2	285	1.61088	0.0171273	sp|Q9H4A5|GLP3L_HUMAN	Q9H4A5	GLP3L_HUMAN	GOLPH3L	Golgi phosphoprotein 3-like
1.06002	0.267408	1.55291	-1.99774	-0.460936	0.218859	-0.154861	-0.235324	-0.250329	+	Cluster -2	967	1.10508	0.039656	sp|Q2KHM9|MOONR_HUMAN	Q2KHM9	MOONR_HUMAN	KIAA0753	Protein moonraker
1.4476	0.0318959	1.70345	-1.55067	-0.296206	-0.292664	-0.186086	-0.324689	-0.532633	+	Cluster -2	222	1.39879	0.0237691	sp|Q92623|TTC9A_HUMAN	Q92623	TTC9A_HUMAN	TTC9	Tetratricopeptide repeat protein 9A
1.34489	0.413721	1.78649	-0.98618	-0.63076	-0.444873	-0.0714776	-1.06545	-0.346351	+	Cluster -2	1088	2.04866	0.00922463	sp|Q8N1F8|S11IP_HUMAN	Q8N1F8	S11IP_HUMAN	STK11IP	Serine/threonine-protein kinase 11-interacting protein
0.939505	0.708224	1.99144	-1.11578	-0.39836	-0.353596	-0.717922	-0.68624	-0.367276	+	Cluster -2	291	2.29278	0.00663365	sp|P29084|T2EB_HUMAN	P29084	T2EB_HUMAN	GTF2E2	Transcription initiation factor IIE subunit beta
1.11229	0.686182	1.00181	-0.875175	-0.669974	-0.747517	1.1138	-1.50343	-0.117977	+	Cluster -2	305	1.05926	0.0438498	sp|Q9UJJ9|GNPTG_HUMAN	Q9UJJ9	GNPTG_HUMAN	GNPTG	N-acetylglucosamine-1-phosphotransferase subunit gamma
0.620355	0.984379	1.44604	-0.622721	-0.874895	-1.00361	0.626878	-1.39744	0.221013	+	Cluster -2	599	1.40962	0.0233813	sp|Q9Y6M1|IF2B2_HUMAN	Q9Y6M1	IF2B2_HUMAN	IGF2BP2	Insulin-like growth factor 2 mRNA-binding protein 2
0.787841	0.304736	2.03542	-0.562492	-1.19843	-0.577737	0.449868	-0.828055	-0.411145	+	Cluster -2	318	1.41144	0.023303	sp|P03886|NU1M_HUMAN	P03886	NU1M_HUMAN	MT-ND1	NADH-ubiquinone oxidoreductase chain 1
0.875317	0.694893	1.83101	-0.0880495	-1.30624	-0.263706	-0.2233	-1.21265	-0.307269	+	Cluster -2	337	1.67335	0.0156784	sp|Q5VT66|MARC1_HUMAN	Q5VT66	MARC1_HUMAN	MTARC1	Mitochondrial amidoxime-reducing component 1
1.37517	0.642596	1.53966	-0.976762	-0.667048	-0.0228939	0.00978616	-0.7055	-1.19501	+	Cluster -2	270	2.04582	0.0092854	sp|Q9NQ88|TIGAR_HUMAN	Q9NQ88	TIGAR_HUMAN	TIGAR	Fructose-2,6-bisphosphatase TIGAR
1.52055	0.536168	1.41201	-0.990762	-0.894681	0.329068	-0.234904	-0.674086	-1.00337	+	Cluster -2	353	1.83062	0.0120864	sp|Q6IN84|MRM1_HUMAN	Q6IN84	MRM1_HUMAN	MRM1	rRNA methyltransferase 1, mitochondrial
1.88767	0.692911	0.887869	-0.449307	-0.861621	-0.0393761	-0.12502	-0.664512	-1.32862	+	Cluster -2	528	1.8822	0.0112648	sp|Q9H3P2|NELFA_HUMAN	Q9H3P2	NELFA_HUMAN	NELFA	Negative elongation factor A
1.63793	0.736105	1.16168	-0.368839	-0.945798	-0.0416368	-0.448204	-0.276541	-1.4547	+	Cluster -2	744	2.06759	0.00901134	sp|Q9C0D3|ZY11B_HUMAN	Q9C0D3	ZY11B_HUMAN	ZYG11B	Protein zyg-11 homolog B
1.72875	0.25083	1.55019	-0.713542	-0.368409	-0.0675677	-0.835918	-0.723381	-0.820949	+	Cluster -2	487	2.16552	0.00793147	sp|Q6P1A2|MBOA5_HUMAN	Q6P1A2	MBOA5_HUMAN	LPCAT3	Lysophospholipid acyltransferase 5
1.21107	0.57653	1.87365	-0.710835	-0.416603	-0.156174	-0.730794	-0.603224	-1.04363	+	Cluster -2	650	2.58733	0.00446395	sp|Q8NCE2|MTMRE_HUMAN	Q8NCE2	MTMRE_HUMAN	MTMR14	Myotubularin-related protein 14
1.21092	1.06945	1.46473	-0.799231	-0.780358	-0.00675981	-0.794009	-0.215989	-1.14875	+	Cluster -2	224	2.80032	0.0039558	sp|Q96MW1|CCD43_HUMAN	Q96MW1	CCD43_HUMAN	CCDC43	Coiled-coil domain-containing protein 43
1.09628	0.372829	1.84823	-0.826076	-0.793966	0.0249184	-0.583318	0.116487	-1.25538	+	Cluster -2	318	1.51809	0.0194188	sp|O75618|DEDD_HUMAN	O75618	DEDD_HUMAN	DEDD	Death effector domain-containing protein
0.765006	0.78915	1.81948	-0.801751	-1.40518	-0.238868	-0.311508	0.201808	-0.818132	+	Cluster -2	371	1.8558	0.0116713	sp|Q96CX6|LRC58_HUMAN	Q96CX6	LRC58_HUMAN	LRRC58	Leucine-rich repeat-containing protein 58
1.37642	0.191879	1.48421	-0.564206	-1.7482	-0.0745296	-0.516686	0.247745	-0.396634	+	Cluster -2	609	1.346	0.0257362	sp|Q9Y2M5|KLH20_HUMAN	Q9Y2M5	KLH20_HUMAN	KLHL20	Kelch-like protein 20
1.62856	0.668851	1.32735	-0.76285	-0.916529	-0.648625	-0.434209	0.175087	-1.03764	+	Cluster -2	475	2.4151	0.00561474	sp|Q9UBM7|DHCR7_HUMAN	Q9UBM7	DHCR7_HUMAN	DHCR7	7-dehydrocholesterol reductase
1.71952	0.565677	1.32035	-1.0146	-1.10774	-0.561819	-0.215045	-0.116443	-0.589904	+	Cluster -2	1182	2.73278	0.00407624	sp|P42684|ABL2_HUMAN	P42684	ABL2_HUMAN	ABL2	Tyrosine-protein kinase ABL2
1.64271	0.751429	1.35913	-0.999636	-0.943838	-0.620019	-0.355571	-0.151879	-0.682332	+	Cluster -2	358	3.28677	0.00272682	sp|Q8TB36|GDAP1_HUMAN	Q8TB36	GDAP1_HUMAN	GDAP1	Ganglioside-induced differentiation-associated protein 1
1.46837	0.969181	1.43748	-0.873753	-0.829301	-0.523894	-0.626645	-0.195889	-0.825547	+	Cluster -2	717	3.79013	0.0017757	sp|Q6P3S6|FBX42_HUMAN	Q6P3S6	FBX42_HUMAN	FBXO42	F-box only protein 42
1.24447	0.780738	1.65446	-1.16176	-0.926442	-0.417171	-0.276166	-0.100572	-0.797554	+	Cluster -2	293	2.79723	0.00398349	sp|Q15800|MSMO1_HUMAN	Q15800	MSMO1_HUMAN	MSMO1	Methylsterol monooxygenase 1
1.6961	0.255739	1.35023	-1.43759	-0.959213	-0.227892	-0.395049	-0.148244	-0.134075	+	Cluster -2	444	1.86198	0.0115639	sp|Q9BSQ5|CCM2_HUMAN	Q9BSQ5	CCM2_HUMAN	CCM2	Cerebral cavernous malformations 2 protein
1.36761	0.592694	1.66014	-1.11908	-1.05234	-0.360911	-0.197788	-0.66517	-0.225161	+	Cluster -2	1043	2.5868	0.00445464	sp|Q8NFZ0|FBH1_HUMAN	Q8NFZ0	FBH1_HUMAN	FBH1	F-box DNA helicase 1
1.33038	0.55923	1.53041	-1.35621	-1.25253	-0.191141	-0.168363	-0.234048	-0.217731	+	Cluster -2	264	2.30879	0.00646016	sp|O75489|NDUS3_HUMAN	O75489	NDUS3_HUMAN	NDUFS3	NADH dehydrogenase [ubiquinone] iron-sulfur protein 3, mitochondrial
1.33946	0.589283	1.06146	-0.834627	-1.62307	0.29801	0.216476	0.0753186	-1.12232	+	Cluster -2	1749	1.17969	0.0345366	sp|Q5SRE5|NU188_HUMAN	Q5SRE5	NU188_HUMAN	NUP188	Nucleoporin NUP188
1.69794	0.166649	1.09731	-1.26988	-0.744092	0.305726	-0.0609194	0.0783021	-1.27104	+	Cluster -2	1502	1.04794	0.0448971	sp|Q9UKJ3|GPTC8_HUMAN	Q9UKJ3	GPTC8_HUMAN	GPATCH8	G patch domain-containing protein 8
1.62366	-0.424215	1.79542	-0.13748	-0.535131	-0.417457	-0.917906	-0.768395	-0.218489	+	Cluster -2	4307	1.113	0.0391382	sp|Q8NCM8|DYHC2_HUMAN	Q8NCM8	DYHC2_HUMAN	DYNC2H1	Cytoplasmic dynein 2 heavy chain 1
1.7309	0.568165	1.28007	-0.371578	-0.71323	-0.121767	-1.36939	-0.465611	-0.537556	+	Cluster -2	354	2.30072	0.00653852	sp|Q96FZ2|HMCES_HUMAN	Q96FZ2	HMCES_HUMAN	HMCES	Abasic site processing protein HMCES
1.76464	0.28393	1.57359	-0.425972	-0.876214	-0.611785	-0.610278	-0.672703	-0.425207	+	Cluster -2	471	2.2406	0.00708134	sp|Q9UK99|FBX3_HUMAN	Q9UK99	FBX3_HUMAN	FBXO3	F-box only protein 3
1.88372	0.125987	1.35303	-0.293963	-1.16221	-0.387258	-0.853957	-0.149189	-0.51616	+	Cluster -2	361	1.60805	0.017168	sp|Q9NV79|PCMD2_HUMAN	Q9NV79	PCMD2_HUMAN	PCMTD2	Protein-L-isoaspartate O-methyltransferase domain-containing protein 2
1.99314	-0.211701	1.145	-0.333298	-1.26061	-0.577916	0.0603511	-0.795833	-0.019129	+	Cluster -2	692	1.12127	0.0384128	sp|Q8NBP7|PCSK9_HUMAN	Q8NBP7	PCSK9_HUMAN	PCSK9	Proprotein convertase subtilisin/kexin type 9
1.8518	-0.0802173	1.14289	0.0906908	-1.56443	-0.477674	-0.485272	-0.574102	0.0963113	+	Cluster -2	866	1.04395	0.0454072	sp|Q9NWF9|RN216_HUMAN	Q9NWF9	RN216_HUMAN	RNF216	E3 ubiquitin-protein ligase RNF216
1.00559	0.996983	1.50235	-0.544005	-0.314293	0.18601	-0.296527	-1.31581	-1.2203	+	Cluster -2	783	2.60914	0.00453448	sp|A0A0B4J2F2|SIK1B_HUMAN	A0A0B4J2F2	SIK1B_HUMAN	SIK1B	Probable serine/threonine-protein kinase SIK1B
1.10983	0.723914	1.7123	-0.615489	-0.618648	-0.344243	0.16306	-1.32578	-0.804944	+	Cluster -2	478	2.02751	0.00944667	sp|Q969K4|ABTB1_HUMAN	Q969K4	ABTB1_HUMAN	ABTB1	Ankyrin repeat and BTB/POZ domain-containing protein 1
1.25563	0.907731	1.60666	-0.3803	-0.878252	-0.243749	-0.288299	-0.973402	-1.00602	+	Cluster -2	716	3.0068	0.00304	sp|Q4VC44|FWCH1_HUMAN	Q4VC44	FWCH1_HUMAN	FLYWCH1	FLYWCH-type zinc finger-containing protein 1
1.31929	0.467137	1.46583	0.246043	-0.887754	0.0362727	-0.641334	-1.55968	-0.445795	+	Cluster -2	335	1.79522	0.0129123	sp|Q969Z3|MARC2_HUMAN	Q969Z3	MARC2_HUMAN	MTARC2	Mitochondrial amidoxime reducing component 2
1.57193	0.5491	1.37636	-0.217279	-0.6261	0.020033	-0.601269	-1.47447	-0.598301	+	Cluster -2	307	2.35418	0.00595472	sp|Q9NTX5|ECHD1_HUMAN	Q9NTX5	ECHD1_HUMAN	ECHDC1	Ethylmalonyl-CoA decarboxylase
1.46838	0.00105905	1.74868	0.0408086	-0.200076	-0.650977	-0.413259	-1.28057	-0.714044	+	Cluster -2	613	1.57057	0.0179619	sp|Q9UJY4|GGA2_HUMAN	Q9UJY4	GGA2_HUMAN	GGA2	ADP-ribosylation factor-binding protein GGA2
1.57664	0.505334	1.44678	-0.0767301	-0.10049	-0.751521	-0.458279	-1.27253	-0.869209	+	Cluster -2	314	2.35905	0.00596232	sp|Q9BRF8|CPPED_HUMAN	Q9BRF8	CPPED_HUMAN	CPPED1	Serine/threonine-protein phosphatase CPPED1
1.56025	0.338352	1.52851	-0.554071	0.0125532	-0.304088	-0.292346	-1.07546	-1.2137	+	Cluster -2	741	2.07654	0.00892202	sp|P78563|RED1_HUMAN	P78563	RED1_HUMAN	ADARB1	Double-stranded RNA-specific editase 1
1.51069	0.363779	1.65461	-0.336001	-0.430683	-0.843734	-0.0019789	-0.975765	-0.940922	+	Cluster -2	346	1.975	0.0101241	sp|Q8WVM0|TFB1M_HUMAN	Q8WVM0	TFB1M_HUMAN	TFB1M	Dimethyladenosine transferase 1, mitochondrial
1.86287	0.268521	1.30753	-0.371501	-0.451975	-0.747307	-0.0082516	-0.68751	-1.17238	+	Cluster -2	735	1.75999	0.0135499	sp|Q6ZW31|SYDE1_HUMAN	Q6ZW31	SYDE1_HUMAN	SYDE1	Rho GTPase-activating protein SYDE1
1.83437	0.377227	1.29871	-0.388656	-0.384623	-0.55892	-0.209474	-0.657887	-1.31075	+	Cluster -2	780	2.00298	0.00970168	sp|Q6ZMI0|PPR21_HUMAN	Q6ZMI0	PPR21_HUMAN	PPP1R21	Protein phosphatase 1 regulatory subunit 21
1.75265	0.545917	1.08552	0.267154	-0.330654	-1.29715	-0.504878	-1.0598	-0.458759	+	Cluster -2	1896	1.68155	0.0155136	sp|O75147|OBSL1_HUMAN	O75147	OBSL1_HUMAN	OBSL1	Obscurin-like protein 1
1.65653	0.758413	0.991342	0.314357	-0.033705	-0.80666	-0.655204	-1.25839	-0.966679	+	Cluster -2	468	2.39289	0.00579951	sp|Q96F44|TRI11_HUMAN	Q96F44	TRI11_HUMAN	TRIM11	E3 ubiquitin-protein ligase TRIM11
1.99476	0.46608	0.851506	0.128485	-0.109373	-0.52753	-0.885657	-1.23081	-0.687458	+	Cluster -2	321	2.06795	0.00901645	sp|Q71RG4|TMUB2_HUMAN	Q71RG4	TMUB2_HUMAN	TMUB2	Transmembrane and ubiquitin-like domain-containing protein 2
1.54709	0.874559	1.30501	-0.752134	0.156336	-0.610398	-0.801574	-1.02686	-0.692033	+	Cluster -2	690	3.05299	0.00302742	sp|Q86WN1|FCSD1_HUMAN	Q86WN1	FCSD1_HUMAN	FCHSD1	F-BAR and double SH3 domains protein 1
1.50262	1.15282	1.18634	-1.11506	-0.165032	-0.559898	-0.495775	-0.897588	-0.608429	+	Cluster -2	766	3.34056	0.00278075	sp|Q7Z7L7|ZER1_HUMAN	Q7Z7L7	ZER1_HUMAN	ZER1	Protein zer-1 homolog
1.60954	0.959704	1.31677	-0.783317	-0.540666	-0.776894	-0.265385	-0.859303	-0.660442	+	Cluster -2	627	3.80024	0.00166184	sp|Q9UK73|FEM1B_HUMAN	Q9UK73	FEM1B_HUMAN	FEM1B	Protein fem-1 homolog B
1.78562	0.56503	1.37214	-0.886584	-0.435742	-0.772058	-0.342728	-0.859171	-0.426511	+	Cluster -2	963	2.66544	0.00432985	sp|Q6VY07|PACS1_HUMAN	Q6VY07	PACS1_HUMAN	PACS1	Phosphofurin acidic cluster sorting protein 1
1.61953	1.00533	1.28992	-0.367234	-0.646812	-0.714535	-0.742247	-0.571475	-0.872483	+	Cluster -2	524	4.26785	0.000222222	sp|P30304|MPIP1_HUMAN	P30304	MPIP1_HUMAN	CDC25A	M-phase inducer phosphatase 1
1.66677	1.23883	0.82234	0.0262895	-0.573594	-0.614076	-0.741854	-0.701347	-1.12335	+	Cluster -2	536	3.13336	0.00292369	sp|P12931|SRC_HUMAN	P12931	SRC_HUMAN	SRC	Proto-oncogene tyrosine-protein kinase Src
1.67705	1.24319	0.806479	-0.796807	-0.0459347	-0.948789	-0.847288	-0.275006	-0.812902	+	Cluster -2	293	2.64284	0.00438117	sp|O60812|HNRC1_HUMAN	O60812	HNRC1_HUMAN	HNRNPCL1	Heterogeneous nuclear ribonucleoprotein C-like 1
1.63677	1.16939	1.09545	-0.975511	-0.616662	-0.780457	-0.628644	-0.37276	-0.527581	+	Cluster -2	261	4.4148	0	sp|Q92506|DHB8_HUMAN	Q92506	DHB8_HUMAN	HSD17B8	Estradiol 17-beta-dehydrogenase 8
1.71799	1.16065	0.983153	-1.01511	-0.70154	-0.751233	-0.476419	-0.461291	-0.456192	+	Cluster -2	469	4.0731	0.00127778	sp|Q16877|F264_HUMAN	Q16877	F264_HUMAN	PFKFB4	6-phosphofructo-2-kinase/fructose-2,6-bisphosphatase 4
1.69259	1.25505	0.944448	-0.80661	-0.633129	-0.567434	-0.841921	-0.376873	-0.666115	+	Cluster -2	953	3.82914	0.0017551	sp|Q86VM9|ZCH18_HUMAN	Q86VM9	ZCH18_HUMAN	ZC3H18	Zinc finger CCCH domain-containing protein 18
1.66577	1.37793	0.834872	-0.620365	-0.770836	-0.761664	-0.465927	-0.457092	-0.802689	+	Cluster -2	587	3.75566	0.00170404	sp|Q96BF6|NACC2_HUMAN	Q96BF6	NACC2_HUMAN	NACC2	Nucleus accumbens-associated protein 2
1.38285	1.56094	0.947969	-0.502702	-0.615563	-0.624069	-0.416438	-0.69853	-1.03446	+	Cluster -2	519	3.90474	0.00193258	sp|O14730|RIOK3_HUMAN	O14730	RIOK3_HUMAN	RIOK3	Serine/threonine-protein kinase RIO3
2.25282	-0.0337422	0.937061	-0.971235	-0.2874	-0.582628	-0.197247	-0.46727	-0.650361	+	Cluster -2	424	1.28959	0.0286566	sp|Q96BI1|S22AI_HUMAN	Q96BI1	S22AI_HUMAN	SLC22A18	Solute carrier family 22 member 18
1.99459	-0.334205	1.29107	-1.15531	-0.398167	-0.276859	-0.0624759	-0.296012	-0.76263	+	Cluster -2	434	1.05469	0.0442833	sp|Q14141|SEPT6_HUMAN	Q14141	SEPT6_HUMAN	SEPTIN6	Septin-6
2.27703	0.309875	0.620307	-0.990145	-0.274817	-0.370682	-0.356794	-0.235989	-0.978785	+	Cluster -2	574	1.3419	0.025935	sp|Q9H5J0|ZBTB3_HUMAN	Q9H5J0	ZBTB3_HUMAN	ZBTB3	Zinc finger and BTB domain-containing protein 3
2.21653	0.412932	0.493094	-1.25989	-0.348712	-0.589651	-0.242476	0.0625019	-0.744326	+	Cluster -2	598	1.34276	0.0258765	sp|Q15051|IQCB1_HUMAN	Q15051	IQCB1_HUMAN	IQCB1	IQ calmodulin-binding motif-containing protein 1
1.97542	0.194813	0.765315	-0.839613	-0.89156	-0.147776	0.496184	-0.27607	-1.27671	+	Cluster -2	374	1.04814	0.0449206	sp|Q9HCN4|GPN1_HUMAN	Q9HCN4	GPN1_HUMAN	GPN1	GPN-loop GTPase 1
2.01696	0.532099	0.4243	-1.16137	-0.319891	-0.157613	0.4401	-0.552248	-1.22233	+	Cluster -2	372	1.05341	0.0443956	sp|P50750|CDK9_HUMAN	P50750	CDK9_HUMAN	CDK9	Cyclin-dependent kinase 9
1.89777	0.942871	0.379068	-1.25052	-0.739668	-0.317049	0.27663	-0.163961	-1.02514	+	Cluster -2	571	1.51936	0.0193384	sp|Q96G74|OTUD5_HUMAN	Q96G74	OTUD5_HUMAN	OTUD5	OTU domain-containing protein 5
1.89475	0.763949	0.2577	-0.845072	-0.549411	-0.457707	0.554853	-0.132823	-1.48624	+	Cluster -2	703	1.0246	0.0471605	sp|P25067|CO8A2_HUMAN	P25067	CO8A2_HUMAN	COL8A2	Collagen alpha-2(VIII) chain
1.86755	0.492796	0.569293	-1.27085	-0.812465	-0.964332	0.632469	-0.57962	0.0651524	+	Cluster -2	587	1.78141	0.013106	sp|Q8NFF5|FAD1_HUMAN	Q8NFF5	FAD1_HUMAN	FLAD1	FAD synthase
1.98517	0.842298	0.401317	-0.877625	-0.988273	-0.869267	0.458428	-0.582563	-0.369483	+	Cluster -2	518	1.83913	0.0119062	sp|Q9NVX7|KBTB4_HUMAN	Q9NVX7	KBTB4_HUMAN	KBTBD4	Kelch repeat and BTB domain-containing protein 4
1.92603	0.631507	0.859157	-1.04198	-0.947368	-0.940605	0.18236	-0.453714	-0.215392	+	Cluster -2	354	2.50668	0.00484211	sp|Q9H832|UBE2Z_HUMAN	Q9H832	UBE2Z_HUMAN	UBE2Z	Ubiquitin-conjugating enzyme E2 Z
2.14908	0.530679	0.515828	-0.488047	-1.12822	-1.00376	0.114552	-0.523823	-0.166286	+	Cluster -2	1428	1.6835	0.0154703	sp|Q8N3P4|VPS8_HUMAN	Q8N3P4	VPS8_HUMAN	VPS8	Vacuolar protein sorting-associated protein 8 homolog
1.93386	0.971594	0.683681	-0.934184	-0.845815	-0.94566	-0.500209	-0.340075	-0.0231922	+	Cluster -2	410	2.73413	0.00408662	sp|Q13569|TDG_HUMAN	Q13569	TDG_HUMAN	TDG	G/T mismatch-specific thymine DNA glycosylase
1.98951	0.36467	1.07902	-0.536706	-0.798266	-1.2415	-0.424091	-0.263897	-0.168741	+	Cluster -2	412	2.08585	0.00892487	sp|O14503|BHE40_HUMAN	O14503	BHE40_HUMAN	BHLHE40	Class E basic helix-loop-helix protein 40
2.08925	0.303026	0.920924	-0.688089	-0.606113	-1.11504	0.173592	-0.526987	-0.550557	+	Cluster -2	615	1.72186	0.0145141	sp|Q96CM8|ACSF2_HUMAN	Q96CM8	ACSF2_HUMAN	ACSF2	Medium-chain acyl-CoA ligase ACSF2, mitochondrial
2.14258	-0.112299	0.853538	-0.907051	-0.54818	-1.23071	0.0210818	-0.0550883	-0.163864	+	Cluster -2	595	1.36313	0.025072	sp|P29350|PTN6_HUMAN	P29350	PTN6_HUMAN	PTPN6	Tyrosine-protein phosphatase non-receptor type 6
1.72974	0.845804	0.792246	-1.01316	-0.853668	-1.35558	0.105182	-0.0034563	-0.247107	+	Cluster -2	2997	3.08237	0.00302457	sp|Q9P2D1|CHD7_HUMAN	Q9P2D1	CHD7_HUMAN	CHD7	Chromodomain-helicase-DNA-binding protein 7
1.65058	0.646971	0.923565	-0.680154	-0.735759	-1.39361	0.0538134	0.455317	-0.920725	+	Cluster -2	163	1.90504	0.0109064	sp|Q8N5L8|RP25L_HUMAN	Q8N5L8	RP25L_HUMAN	RPP25L	Ribonuclease P protein subunit p25-like protein
1.56488	0.533797	1.07979	-0.997409	-0.865823	-1.25439	0.363519	0.317024	-0.741392	+	Cluster -2	1059	2.27894	0.00679143	sp|Q6JQN1|ACD10_HUMAN	Q6JQN1	ACD10_HUMAN	ACAD10	Acyl-CoA dehydrogenase family member 10
1.23939	0.991094	1.17355	-1.16967	-0.822432	-0.990688	0.503349	-0.0164016	-0.908193	+	Cluster -2	846	2.57015	0.00444534	sp|O15516|CLOCK_HUMAN	O15516	CLOCK_HUMAN	CLOCK	Circadian locomoter output cycles protein kaput
1.19828	0.668688	1.63524	-1.17074	-0.69568	-1.01439	0.24145	-0.177606	-0.685237	+	Cluster -2	952	2.688	0.00424431	sp|P10253|LYAG_HUMAN	P10253	LYAG_HUMAN	GAA	Lysosomal alpha-glucosidase
1.5687	1.06494	0.997701	-0.741665	-0.683751	-1.11385	0.0877357	-0.116764	-1.06305	+	Cluster -2	1139	2.63631	0.00441425	sp|Q08999|RBL2_HUMAN	Q08999	RBL2_HUMAN	RBL2	Retinoblastoma-like protein 2
1.77853	0.988154	0.928111	-0.470488	-0.732797	-0.828408	-0.32819	-0.14034	-1.19457	+	Cluster -2	469	2.52535	0.00455556	sp|Q53EL6|PDCD4_HUMAN	Q53EL6	PDCD4_HUMAN	PDCD4	Programmed cell death protein 4
2.15948	0.66973	0.550861	-0.292041	-0.932655	-1.08315	-0.31822	-0.188845	-0.565152	+	Cluster -2	536	1.78479	0.0130478	sp|O75123|ZN623_HUMAN	O75123	ZN623_HUMAN	ZNF623	Zinc finger protein 623
1.94817	0.885271	0.531268	-0.155095	-1.01602	-1.20148	-0.179736	-0.0343636	-0.77801	+	Cluster -2	246	1.79209	0.0129534	sp|Q16560|U1SBP_HUMAN	Q16560	U1SBP_HUMAN	SNRNP35	U11/U12 small nuclear ribonucleoprotein 35 kDa protein
1.92944	0.527218	0.765719	-0.127584	-0.892945	-1.47126	0.0469555	-0.133572	-0.643977	+	Cluster -2	1705	1.6291	0.0167977	sp|Q8N1W1|ARG28_HUMAN	Q8N1W1	ARG28_HUMAN	ARHGEF28	Rho guanine nucleotide exchange factor 28
2.11997	0.460409	0.863758	-0.349513	-0.655014	-0.890985	-0.412268	-0.128287	-1.00807	+	Cluster -2	1828	1.7747	0.0131792	sp|O14647|CHD2_HUMAN	O14647	CHD2_HUMAN	CHD2	Chromodomain-helicase-DNA-binding protein 2
1.32436	1.19916	0.958062	-1.71642	-0.783352	0.00372204	-0.395111	-0.291248	-0.299167	+	Cluster -2	152	2.13072	0.0083841	sp|Q9NSK7|CS012_HUMAN	Q9NSK7	CS012_HUMAN	C19orf12	Protein C19orf12
1.09082	1.04039	1.26303	-1.74138	-0.622154	0.0549025	0.0780248	-0.466052	-0.697587	+	Cluster -2	526	1.81256	0.0125479	sp|Q9BVK2|ALG8_HUMAN	Q9BVK2	ALG8_HUMAN	ALG8	Probable dolichyl pyrophosphate Glc1Man9GlcNAc2 alpha-1,3-glucosyltransferase
1.16351	1.16528	0.831981	-1.86114	-0.655479	0.11446	0.0656127	0.0035889	-0.827815	+	Cluster -2	641	1.48732	0.0205324	sp|P34931|HS71L_HUMAN	P34931	HS71L_HUMAN	HSPA1L	Heat shock 70 kDa protein 1-like
1.37765	1.45361	0.528013	-1.63433	-0.265265	-0.0900831	0.00733147	-0.608581	-0.768341	+	Cluster -2	588	1.62774	0.0167943	sp|Q9HCS4|TF7L1_HUMAN	Q9HCS4	TF7L1_HUMAN	TCF7L1	Transcription factor 7-like 1
1.67294	1.1382	0.73366	-1.47567	0.0547519	-0.347929	-0.690079	-0.549668	-0.536203	+	Cluster -2	409	2.00482	0.0096535	sp|Q6UWZ7|ABRX1_HUMAN	Q6UWZ7	ABRX1_HUMAN	ABRAXAS1	BRCA1-A complex subunit Abraxas 1
1.89978	0.91978	0.817081	-1.30699	-0.494898	-0.292928	-0.52138	-0.358905	-0.661539	+	Cluster -2	506	2.3314	0.0062618	sp|Q96JB5|CK5P3_HUMAN	Q96JB5	CK5P3_HUMAN	CDK5RAP3	CDK5 regulatory subunit-associated protein 3
1.72424	0.933192	0.613018	-1.51748	-0.404435	0.190495	-0.7677	0.0564377	-0.827768	+	Cluster -2	132	1.44155	0.0221672	sp|Q4G0I0|CSMT1_HUMAN	Q4G0I0	CSMT1_HUMAN	CCSMST1	Protein CCSMST1
1.61787	1.06767	0.490787	-1.60912	-1.11816	-0.00581547	-0.149833	-0.366519	0.0731167	+	Cluster -2	577	1.7541	0.013861	sp|Q13416|ORC2_HUMAN	Q13416	ORC2_HUMAN	ORC2	Origin recognition complex subunit 2
1.54864	1.0638	0.857837	-1.14724	-0.539087	-0.113372	0.115095	-1.3963	-0.389377	+	Cluster -2	446	1.82204	0.0122861	sp|A6NHL2|TBAL3_HUMAN	A6NHL2	TBAL3_HUMAN	TUBAL3	Tubulin alpha chain-like 3
1.52369	1.3849	0.647575	-1.36432	-0.723653	-0.0821226	-0.270905	-0.914007	-0.201155	+	Cluster -2	711	2.11794	0.00854524	sp|A2AJT9|BCLA3_HUMAN	A2AJT9	BCLA3_HUMAN	BCLAF3	BCLAF1 and THRAP3 family member 3
1.58031	1.36403	0.675474	-1.17712	-1.00922	-0.125417	-0.0769801	-0.648738	-0.582338	+	Cluster -2	536	2.38706	0.00596275	sp|Q6UWY0|ARSK_HUMAN	Q6UWY0	ARSK_HUMAN	ARSK	Arylsulfatase K
1.84716	0.986889	0.294929	-1.32466	-0.7405	0.240056	-0.0942031	-1.06627	-0.143403	+	Cluster -2	514	1.25233	0.0303499	sp|P20839|IMDH1_HUMAN	P20839	IMDH1_HUMAN	IMPDH1	Inosine-5'-monophosphate dehydrogenase 1
1.49248	1.62631	0.2599	-1.16323	-0.505092	-0.400165	-0.285401	-1.0977	0.0728933	+	Cluster -2	210	1.68414	0.0154594	sp|Q4VC05|BCL7A_HUMAN	Q4VC05	BCL7A_HUMAN	BCL7A	B-cell CLL/lymphoma 7 protein family member A
1.51755	1.45525	0.353364	-1.18124	-0.503357	-0.256724	-0.599545	-1.12478	0.339487	+	Cluster -2	292	1.55959	0.0183071	sp|Q6ZUT1|NKAP1_HUMAN	Q6ZUT1	NKAP1_HUMAN	NKAPD1	Uncharacterized protein NKAPD1
1.3385	1.66024	0.666035	-1.2439	-0.588435	-0.541654	-0.404264	-0.807345	-0.0791728	+	Cluster -2	393	2.59798	0.00453503	sp|Q9Y4P1|ATG4B_HUMAN	Q9Y4P1	ATG4B_HUMAN	ATG4B	Cysteine protease ATG4B
1.52869	1.66251	0.166731	-1.27506	-0.684644	-0.566146	-0.23983	-0.630369	0.038119	+	Cluster -2	1953	1.88402	0.0112873	sp|Q6YHU6|THADA_HUMAN	Q6YHU6	THADA_HUMAN	THADA	Thyroid adenoma-associated protein
1.60825	0.995033	1.01066	-1.13805	-1.00409	-0.35058	-0.551325	-0.789629	0.219736	+	Cluster -2	612	2.52015	0.00464	sp|Q96G03|PGM2_HUMAN	Q96G03	PGM2_HUMAN	PGM2	Phosphoglucomutase-2
1.74659	0.494086	1.23598	-0.722757	-1.04571	-0.337439	-0.351662	-1.14397	0.124874	+	Cluster -2	441	1.89628	0.0110365	sp|Q9H993|ARMT1_HUMAN	Q9H993	ARMT1_HUMAN	ARMT1	Damage-control phosphatase ARMT1
1.98615	0.483803	0.985186	-0.828013	-1.02424	-0.192548	-0.812168	-0.645696	0.0475295	+	Cluster -2	284	1.8299	0.0120845	sp|Q8N3Z3|GTPB8_HUMAN	Q8N3Z3	GTPB8_HUMAN	GTPBP8	GTP-binding protein 8
1.95119	0.719848	0.659477	-0.743956	-1.19278	-0.102069	-0.047378	-1.11039	-0.133946	+	Cluster -2	418	1.59009	0.0175801	sp|Q8IVH4|MMAA_HUMAN	Q8IVH4	MMAA_HUMAN	MMAA	Methylmalonic aciduria type A protein, mitochondrial
1.87231	0.648634	0.698283	-0.399334	-1.28121	0.330009	-0.180727	-1.17489	-0.513075	+	Cluster -2	273	1.38016	0.0245054	sp|Q96EY5|MB12A_HUMAN	Q96EY5	MB12A_HUMAN	MVB12A	Multivesicular body subunit 12A
1.79001	1.02937	0.553333	-0.398693	-1.58642	0.0492506	-0.392108	-0.684347	-0.360392	+	Cluster -2	677	1.64067	0.0165483	sp|Q8TAF3|WDR48_HUMAN	Q8TAF3	WDR48_HUMAN	WDR48	WD repeat-containing protein 48
2.22187	0.896682	-0.20169	-0.838257	-1.08911	-0.115861	-0.164263	-0.217311	-0.492057	+	Cluster -2	112	1.07039	0.042974	sp|Q96EL3|RM53_HUMAN	Q96EL3	RM53_HUMAN	MRPL53	39S ribosomal protein L53, mitochondrial
2.06933	0.909724	0.382249	-1.26898	-0.813834	-0.191073	-0.514273	-0.230476	-0.342662	+	Cluster -2	253	1.7326	0.0143123	sp|Q96S44|PRPK_HUMAN	Q96S44	PRPK_HUMAN	TP53RK	EKC/KEOPS complex subunit TP53RK
2.27735	0.580744	0.295709	-0.944769	-0.968671	-0.248269	-0.499187	0.00430428	-0.49721	+	Cluster -2	323	1.36837	0.0248909	sp|Q5PSV4|BRM1L_HUMAN	Q5PSV4	BRM1L_HUMAN	BRMS1L	Breast cancer metastasis-suppressor 1-like protein
2.08767	1.04693	0.255217	-0.847019	-0.259366	-0.0590896	-0.908591	-0.681014	-0.634741	+	Cluster -2	212	1.76282	0.0134578	sp|Q96CM4|NXNL1_HUMAN	Q96CM4	NXNL1_HUMAN	NXNL1	Nucleoredoxin-like protein 1
2.16993	1.00149	0.131214	-0.922511	-0.63334	-0.0410792	-0.737993	-0.436487	-0.531226	+	Cluster -2	628	1.49255	0.0203451	sp|Q8IYD1|ERF3B_HUMAN	Q8IYD1	ERF3B_HUMAN	GSPT2	Eukaryotic peptide chain release factor GTP-binding subunit ERF3B
2.23234	0.504811	0.31138	-1.26948	-0.226081	0.0072987	-0.357657	-0.876149	-0.326461	+	Cluster -2	291	1.13321	0.0375017	sp|Q9NUL5|SHFL_HUMAN	Q9NUL5	SHFL_HUMAN	SHFL	Shiftless antiviral inhibitor of ribosomal frameshifting protein
2.15722	0.709867	0.468803	-0.687089	-0.360673	0.143428	-0.674114	-0.903808	-0.85363	+	Cluster -2	421	1.77579	0.0131706	sp|Q86TX2|ACOT1_HUMAN	Q86TX2	ACOT1_HUMAN	ACOT1	Acyl-coenzyme A thioesterase 1
2.12235	0.742072	0.24573	-0.854238	-0.0604535	0.142253	-0.396421	-1.1822	-0.759097	+	Cluster -2	551	1.38884	0.0242436	sp|Q04206|TF65_HUMAN	Q04206	TF65_HUMAN	RELA	Transcription factor p65
1.41777	1.04987	1.05925	-0.0044972	-0.868523	-0.834648	0.290402	-1.00435	-1.10527	+	Cluster -2	460	1.95916	0.0103232	sp|Q99952|PTN18_HUMAN	Q99952	PTN18_HUMAN	PTPN18	Tyrosine-protein phosphatase non-receptor type 18
1.41931	0.721222	1.17775	-0.078194	-0.69817	-0.528109	0.466062	-1.32282	-1.15705	+	Cluster -2	158	1.56288	0.0182044	sp|P24666|PPAC_HUMAN	P24666	PPAC_HUMAN	ACP1	Low molecular weight phosphotyrosine protein phosphatase
1.15324	1.23821	0.743713	-0.0672023	-0.831918	-1.00199	0.816005	-0.784262	-1.2658	+	Cluster -2	770	1.27305	0.0293512	sp|Q04724|TLE1_HUMAN	Q04724	TLE1_HUMAN	TLE1	Transducin-like enhancer protein 1
1.65726	1.03195	0.453469	-0.714511	-0.899418	-0.547361	0.817479	-0.702443	-1.09643	+	Cluster -2	450	1.35402	0.0253497	sp|P41240|CSK_HUMAN	P41240	CSK_HUMAN	CSK	Tyrosine-protein kinase CSK
1.52004	1.01025	0.818514	-0.447926	-1.08784	-0.542345	0.640141	-0.74888	-1.16195	+	Cluster -2	233	1.63312	0.0167396	sp|O95999|BCL10_HUMAN	O95999	BCL10_HUMAN	BCL10	B-cell lymphoma/leukemia 10
1.70284	0.436303	0.637739	0.41967	-0.889312	-0.0437078	0.346083	-1.23574	-1.37387	+	Cluster -2	1004	1.02814	0.0468649	sp|Q969F9|HPS3_HUMAN	Q969F9	HPS3_HUMAN	HPS3	Hermansky-Pudlak syndrome 3 protein
1.48194	0.868123	0.669583	0.227249	-1.42037	0.110357	0.262365	-1.22886	-0.970394	+	Cluster -2	907	1.14614	0.036446	sp|A8MPP1|D11L8_HUMAN	A8MPP1	D11L8_HUMAN	DDX11L8	Putative ATP-dependent RNA helicase DDX11-like protein 8
1.93086	0.976547	0.192627	0.13702	-0.398507	-0.624414	0.106826	-1.22659	-1.09436	+	Cluster -2	462	1.32168	0.0271129	sp|Q96CB8|INT12_HUMAN	Q96CB8	INT12_HUMAN	INTS12	Integrator complex subunit 12
1.71106	1.14786	0.329314	-0.0351412	-0.624123	0.00568648	-0.0378181	-1.51005	-0.986797	+	Cluster -2	636	1.60842	0.0171512	sp|O15350|P73_HUMAN	O15350	P73_HUMAN	TP73	Tumor protein p73
1.80412	1.06576	0.567408	-0.313495	-0.544738	-0.397968	0.0490755	-1.46491	-0.765241	+	Cluster -2	293	1.83918	0.0119113	sp|Q8NDD1|CA131_HUMAN	Q8NDD1	CA131_HUMAN	C1orf131	Uncharacterized protein C1orf131
1.70556	0.393675	1.09274	0.0133662	-1.56754	-0.307102	0.00636685	-0.283551	-1.05351	+	Cluster -2	89	1.34075	0.0259941	sp|Q9Y5J7|TIM9_HUMAN	Q9Y5J7	TIM9_HUMAN	TIMM9	Mitochondrial import inner membrane translocase subunit Tim9
1.64078	0.860385	0.562264	-0.0124665	-1.74216	-0.975864	0.202784	-0.0688539	-0.466866	+	Cluster -2	1127	1.59626	0.0174213	sp|Q9UPN9|TRI33_HUMAN	Q9UPN9	TRI33_HUMAN	TRIM33	E3 ubiquitin-protein ligase TRIM33
1.40226	0.824778	0.664254	0.235733	-1.71101	-1.19864	0.489552	-0.390667	-0.316252	+	Cluster -2	188	1.36109	0.0250932	sp|Q16384|SSX1_HUMAN	Q16384	SSX1_HUMAN	SSX1	Protein SSX1
1.71918	1.18023	0.322685	-0.215759	-1.72823	-0.600567	-0.234413	-0.211068	-0.232053	+	Cluster -2	213	1.66546	0.0159147	sp|Q96B77|TM186_HUMAN	Q96B77	TM186_HUMAN	TMEM186	Transmembrane protein 186
2.22291	0.696213	0.147912	-0.00300287	-1.21353	-0.463734	-0.0765816	-0.645282	-0.664909	+	Cluster -2	165	1.16074	0.0356568	sp|P62937|PPIA_HUMAN	P62937	PPIA_HUMAN	PPIA	Peptidyl-prolyl cis-trans isomerase A
1.69003	0.72005	0.747107	0.364299	-1.21403	-1.00291	0.300375	-0.998227	-0.606701	+	Cluster -2	222	1.29275	0.0285305	sp|A9UHW6|MI4GD_HUMAN	A9UHW6	MI4GD_HUMAN	MIF4GD	MIF4G domain-containing protein
1.10811	1.19325	0.51452	-0.28169	-1.53262	-0.627175	0.444029	0.520786	-1.33921	+	Cluster -2	684	1.14458	0.0365767	sp|Q8WVZ9|KBTB7_HUMAN	Q8WVZ9	KBTB7_HUMAN	KBTBD7	Kelch repeat and BTB domain-containing protein 7
0.617963	1.24271	1.21912	0.366077	-1.66406	-0.492687	-0.3171	0.173054	-1.14508	+	Cluster -2	1265	1.18752	0.0342074	sp|P78312|F193A_HUMAN	P78312	F193A_HUMAN	FAM193A	Protein FAM193A
1.26981	0.833795	0.95886	-0.016165	-1.67791	-0.0920333	-0.356658	0.37643	-1.29613	+	Cluster -2	576	1.16668	0.0352968	sp|Q4G176|ACSF3_HUMAN	Q4G176	ACSF3_HUMAN	ACSF3	Malonate--CoA ligase ACSF3, mitochondrial
1.58178	0.547538	0.60756	-0.425758	-0.670393	-1.19445	0.384905	0.651668	-1.48284	+	Cluster -2	371	1.00896	0.0490377	sp|Q8N357|S35F6_HUMAN	Q8N357	S35F6_HUMAN	SLC35F6	Solute carrier family 35 member F6
1.00775	0.418502	0.854423	-0.303361	-1.78032	-1.0258	0.212469	1.18291	-0.566578	+	Cluster -2	1347	1.36118	0.0251001	sp|Q6ZU65|UBN2_HUMAN	Q6ZU65	UBN2_HUMAN	UBN2	Ubinuclein-2
1.47183	0.0205566	0.968501	-0.772836	-1.29034	-1.08978	0.510399	0.855166	-0.673504	+	Cluster -2	593	1.5113	0.0196724	sp|P43378|PTN9_HUMAN	P43378	PTN9_HUMAN	PTPN9	Tyrosine-protein phosphatase non-receptor type 9
0.310423	0.912264	1.02971	-0.346732	-0.558282	-2.18457	0.682476	0.483024	-0.328311	+	Cluster -2	1019	1.32503	0.0268639	sp|Q6P9B9|INT5_HUMAN	Q6P9B9	INT5_HUMAN	INTS5	Integrator complex subunit 5
1.47443	0.244488	1.10417	-0.983928	-0.802698	-1.48677	-0.489658	0.616009	0.323955	+	Cluster -2	383	2.01478	0.00958676	sp|Q9NXR7|BABA2_HUMAN	Q9NXR7	BABA2_HUMAN	BABAM2	BRISC and BRCA1-A complex member 2
1.0656	0.0243692	1.04346	-0.631069	-1.08754	-1.61162	-0.40727	1.07071	0.533356	+	Cluster -2	99	1.61925	0.0169046	sp|Q69YL0|NCAS2_HUMAN	Q69YL0	NCAS2_HUMAN	NCBP2AS2	Protein NCBP2AS2
1.01338	0.391345	1.54992	-0.712999	-1.30711	-1.16157	-0.670117	0.446558	0.450587	+	Cluster -2	429	2.01909	0.00957725	sp|Q8NFZ5|TNIP2_HUMAN	Q8NFZ5	TNIP2_HUMAN	TNIP2	TNFAIP3-interacting protein 2
0.787235	-0.386258	1.95861	-0.667231	-0.637133	-1.46006	-0.253159	0.585339	0.072651	+	Cluster -2	1802	1.06147	0.0437186	sp|Q6RI45|BRWD3_HUMAN	Q6RI45	BRWD3_HUMAN	BRWD3	Bromodomain and WD repeat-containing protein 3
0.535067	0.514144	1.8544	-0.787462	-0.789832	-1.40609	-0.489101	-0.156321	0.725194	+	Cluster -2	259	1.66979	0.0157373	sp|Q9H0R4|HDHD2_HUMAN	Q9H0R4	HDHD2_HUMAN	HDHD2	Haloacid dehalogenase-like hydrolase domain-containing protein 2
0.26682	0.267725	2.12505	-0.690988	-1.2228	-0.616942	-0.83479	0.208149	0.497771	+	Cluster -2	1288	1.0764	0.0424401	sp|O14841|OPLA_HUMAN	O14841	OPLA_HUMAN	OPLAH	5-oxoprolinase
0.46396	0.549354	1.87927	-0.664056	-1.30256	-1.27162	0.391189	0.123163	-0.168701	+	Cluster -2	672	2.03662	0.00935816	sp|Q9NPB8|GPCP1_HUMAN	Q9NPB8	GPCP1_HUMAN	GPCPD1	Glycerophosphocholine phosphodiesterase GPCPD1
0.869622	0.907378	1.30191	-0.291843	-1.78481	-1.11427	0.137008	0.299004	-0.324008	+	Cluster -2	349	2.23243	0.00714674	sp|Q9NWT6|HIF1N_HUMAN	Q9NWT6	HIF1N_HUMAN	HIF1AN	Hypoxia-inducible factor 1-alpha inhibitor
1.10277	0.161844	2.03856	-0.816137	-0.820758	-0.81754	-0.526595	0.202719	-0.524864	+	Cluster -2	953	1.73346	0.0142915	sp|Q8TCN5|ZN507_HUMAN	Q8TCN5	ZN507_HUMAN	ZNF507	Zinc finger protein 507
0.6812	0.0219657	2.27578	-0.423615	-0.890976	-1.02954	-0.174987	0.0756228	-0.535458	+	Cluster -2	213	1.24532	0.030674	sp|P61018|RAB4B_HUMAN	P61018	RAB4B_HUMAN	RAB4B	Ras-related protein Rab-4B
0.879196	0.448322	1.95972	-0.577416	-0.392682	-1.3804	0.0663669	-0.124118	-0.878987	+	Cluster -2	2813	1.64468	0.0164919	sp|Q12802|AKP13_HUMAN	Q12802	AKP13_HUMAN	AKAP13	A-kinase anchor protein 13
1.09675	0.156871	1.84752	-0.744744	-0.670739	-1.25382	0.412335	-0.0641361	-0.780038	+	Cluster -2	338	1.59214	0.0175474	sp|Q07352|TISB_HUMAN	Q07352	TISB_HUMAN	ZFP36L1	mRNA decay activator protein ZFP36L1
0.148581	0.492894	2.15726	-0.754073	-0.456214	-1.33352	0.206351	0.203651	-0.66493	+	Cluster -2	92	1.1896	0.0340637	sp|P62304|RUXE_HUMAN	P62304	RUXE_HUMAN	SNRPE	Small nuclear ribonucleoprotein E
0.817841	1.06249	1.52087	-0.513798	-0.803192	-1.66854	-0.226477	0.157269	-0.346461	+	Cluster -2	408	2.5672	0.00444044	sp|Q9H3H5|GPT_HUMAN	Q9H3H5	GPT_HUMAN	DPAGT1	UDP-N-acetylglucosamine--dolichyl-phosphate N-acetylglucosaminephosphotransferase
0.867114	1.17581	1.76419	-0.795865	-0.707707	-1.0162	-0.508651	-0.278917	-0.499777	+	Cluster -2	398	3.61293	0.00241825	sp|Q15438|CYH1_HUMAN	Q15438	CYH1_HUMAN	CYTH1	Cytohesin-1
1.06428	-0.862951	0.677602	-0.71885	-0.712031	-1.4516	0.162492	0.28355	1.5575	+	Cluster -2	1279	1.0278	0.0468906	sp|Q9UPP5|K1107_HUMAN	Q9UPP5	K1107_HUMAN	KIAA1107	AP2-interacting clathrin-endocytosis protein
1.2635	-0.278179	0.190853	-0.306018	-0.925001	-1.84541	0.0635667	0.568938	1.26775	+	Cluster -2	1798	1.20183	0.0332949	sp|Q6P0Q8|MAST2_HUMAN	Q6P0Q8	MAST2_HUMAN	MAST2	Microtubule-associated serine/threonine-protein kinase 2
1.47004	-0.166342	1.52791	-0.396959	-0.555977	-1.67558	-0.141541	-0.331311	0.26976	+	Cluster -2	278	1.27333	0.0293457	sp|Q8WXK3|ASB13_HUMAN	Q8WXK3	ASB13_HUMAN	ASB13	Ankyrin repeat and SOCS box protein 13
1.30973	-0.108761	1.82763	-0.650794	-0.20057	-1.34851	-0.472212	-0.604754	0.24824	+	Cluster -2	354	1.23499	0.0313148	sp|P00480|OTC_HUMAN	P00480	OTC_HUMAN	OTC	Ornithine carbamoyltransferase, mitochondrial
1.64298	-0.458893	1.22501	-0.784844	-1.24879	-0.780341	0.394396	-0.564586	0.575074	+	Cluster -2	262	1.12588	0.0380747	sp|Q6PID6|TTC33_HUMAN	Q6PID6	TTC33_HUMAN	TTC33	Tetratricopeptide repeat protein 33
1.58214	-0.141424	1.34346	-0.118427	-0.983979	-1.55268	0.314117	-0.42412	-0.0190847	+	Cluster -2	360	1.25179	0.0303538	sp|Q9UGM6|SYWM_HUMAN	Q9UGM6	SYWM_HUMAN	WARS2	Tryptophan--tRNA ligase, mitochondrial
1.5963	-0.264968	1.05028	-0.58994	-1.42297	-1.21415	0.63191	0.175336	0.0381987	+	Cluster -2	683	1.56877	0.0180154	sp|Q96DU7|IP3KC_HUMAN	Q96DU7	IP3KC_HUMAN	ITPKC	Inositol-trisphosphate 3-kinase C
1.10895	-0.696451	1.40502	-0.981205	-0.79999	-1.38817	0.422552	0.172238	0.757057	+	Cluster -2	731	1.3036	0.0279747	sp|Q96AQ6|PBIP1_HUMAN	Q96AQ6	PBIP1_HUMAN	PBXIP1	Pre-B-cell leukemia transcription factor-interacting protein 1
1.07119	-0.461939	1.10428	-0.559076	-1.27633	-1.56517	0.488962	0.409839	0.788249	+	Cluster -2	236	1.67143	0.0157396	sp|Q8N6I1|EID2_HUMAN	Q8N6I1	EID2_HUMAN	EID2	EP300-interacting inhibitor of differentiation 2
1.30021	-0.690205	1.43382	-0.491736	-1.15822	-1.34524	0.156645	0.249114	0.545617	+	Cluster -2	1020	1.14763	0.0364053	sp|Q6P1M3|L2GL2_HUMAN	Q6P1M3	L2GL2_HUMAN	LLGL2	LLGL scribble cell polarity complex component 2
0.679995	-0.35565	1.80583	-0.57534	-1.58842	-0.82997	0.549347	-0.200668	0.514881	+	Cluster -2	266	1.17306	0.0349309	sp|A4D2B0|MBLC1_HUMAN	A4D2B0	MBLC1_HUMAN	MBLAC1	Metallo-beta-lactamase domain-containing protein 1
0.0940846	0.490562	0.580513	1.38667	0.827504	0.0789597	-0.763347	-0.80636	-1.88858	+	Cluster -3	1045	1.93763	0.0106289	sp|Q9Y4F1|FARP1_HUMAN	Q9Y4F1	FARP1_HUMAN	FARP1	FERM, ARHGEF and pleckstrin domain-containing protein 1
0.196683	0.022322	0.529168	1.48903	0.722061	0.229271	-0.131477	-1.21262	-1.84443	+	Cluster -3	558	1.54743	0.0186121	sp|Q9NUQ6|SPS2L_HUMAN	Q9NUQ6	SPS2L_HUMAN	SPATS2L	SPATS2-like protein
0.345591	0.90526	1.20399	0.599384	0.381962	-0.175154	-0.312848	-0.912016	-2.03617	+	Cluster -3	1507	1.66446	0.0159427	sp|P57071|PRD15_HUMAN	P57071	PRD15_HUMAN	PRDM15	PR domain zinc finger protein 15
0.517565	0.514731	1.32885	0.686892	0.469068	-0.446316	-0.0878575	-1.07099	-1.91195	+	Cluster -3	109	1.35367	0.0253526	sp|P12074|CX6A1_HUMAN	P12074	CX6A1_HUMAN	COX6A1	Cytochrome c oxidase subunit 6A1, mitochondrial
-0.135381	0.862006	0.898733	0.698023	0.577795	0.087165	-0.236289	-0.438079	-2.31397	+	Cluster -3	784	1.06837	0.0431084	sp|O60603|TLR2_HUMAN	O60603	TLR2_HUMAN	TLR2	Toll-like receptor 2
-0.530277	0.450787	0.898816	1.2406	-0.06616	0.917416	-0.124768	-0.932226	-1.85419	+	Cluster -3	950	1.07981	0.0420979	sp|Q9BXW6|OSBL1_HUMAN	Q9BXW6	OSBL1_HUMAN	OSBPL1A	Oxysterol-binding protein-related protein 1
-0.391243	1.099	0.937824	1.21303	-0.413179	0.514411	-0.482815	-0.713194	-1.76383	+	Cluster -3	409	1.03986	0.0458095	sp|Q9UG56|PISD_HUMAN	Q9UG56	PISD_HUMAN	PISD	Phosphatidylserine decarboxylase proenzyme, mitochondrial
-0.216977	0.891105	0.846258	1.07986	-0.375016	0.989843	-0.901932	-0.578899	-1.73424	+	Cluster -3	917	1.35548	0.0252965	sp|Q2TB90|HKDC1_HUMAN	Q2TB90	HKDC1_HUMAN	HKDC1	Hexokinase HKDC1
0.62884	1.03256	0.538038	0.546655	-0.67126	0.880598	-0.43885	-0.432207	-2.08438	+	Cluster -3	1137	1.15949	0.0357225	sp|P78524|DEN2B_HUMAN	P78524	DEN2B_HUMAN	DENND2B	DENN domain-containing protein 2B
-0.148022	1.39941	0.627589	0.670187	-0.164948	0.557656	0.0492822	-1.06979	-1.92137	+	Cluster -3	664	1.0543	0.044325	sp|Q8WU17|RN139_HUMAN	Q8WU17	RN139_HUMAN	RNF139	E3 ubiquitin-protein ligase RNF139
0.522254	0.644953	1.00493	0.744601	-0.265835	0.318525	0.173876	-1.0219	-2.1214	+	Cluster -3	219	1.16315	0.0355047	sp|O95716|RAB3D_HUMAN	O95716	RAB3D_HUMAN	RAB3D	Ras-related protein Rab-3D
0.544685	1.05363	1.15739	0.755853	-0.423331	0.16599	-0.362843	-1.15944	-1.73193	+	Cluster -3	513	1.90362	0.0109456	sp|O43474|KLF4_HUMAN	O43474	KLF4_HUMAN	KLF4	Krueppel-like factor 4
-0.367816	0.603763	1.1746	0.427947	0.932019	0.654498	-0.461515	-1.61629	-1.3472	+	Cluster -3	184	1.75892	0.0136058	sp|Q9NRW4|DUS22_HUMAN	Q9NRW4	DUS22_HUMAN	DUSP22	Dual specificity protein phosphatase 22
-0.48549	0.740586	1.09595	0.251378	1.15112	0.450374	-0.259071	-1.37137	-1.57348	+	Cluster -3	552	1.356	0.0252636	sp|Q96FL9|GLT14_HUMAN	Q96FL9	GLT14_HUMAN	GALNT14	Polypeptide N-acetylgalactosaminyltransferase 14
-0.0679174	0.257214	0.792763	0.659343	1.07698	0.721371	-0.521229	-2.03162	-0.8869	+	Cluster -3	777	2.00182	0.00970409	sp|Q99728|BARD1_HUMAN	Q99728	BARD1_HUMAN	BARD1	BRCA1-associated RING domain protein 1
-0.273439	0.160264	1.27574	0.22656	1.26174	0.594455	-0.726694	-1.79575	-0.722873	+	Cluster -3	1016	1.46795	0.0211468	sp|Q9UPR3|SMG5_HUMAN	Q9UPR3	SMG5_HUMAN	SMG5	Protein SMG5
-0.603964	0.00480892	1.12236	0.440878	1.35632	0.752236	-0.501977	-1.61666	-0.954005	+	Cluster -3	1782	1.46677	0.0212257	sp|Q02952|AKA12_HUMAN	Q02952	AKA12_HUMAN	AKAP12	A-kinase anchor protein 12
-0.138701	0.642396	0.0790079	-0.0414945	1.63602	0.792078	-0.140813	-1.75787	-1.07062	+	Cluster -3	259	1.25669	0.0300532	sp|P18405|S5A1_HUMAN	P18405	S5A1_HUMAN	SRD5A1	3-oxo-5-alpha-steroid 4-dehydrogenase 1
0.130527	0.1611	1.01442	1.00681	0.231304	0.514198	0.018454	-2.19517	-0.881638	+	Cluster -3	315	1.15767	0.0357668	sp|Q8TEB9|RHBL4_HUMAN	Q8TEB9	RHBL4_HUMAN	RHBDD1	Rhomboid-related protein 4
0.351886	0.527453	0.618775	1.1169	0.0224778	0.738543	-0.394349	-2.13152	-0.850172	+	Cluster -3	121	1.6371	0.0166829	sp|P0CG13|CTF8_HUMAN	P0CG13	CTF8_HUMAN	CHTF8	Chromosome transmission fidelity protein 8 homolog
0.06335	0.0869199	1.24828	0.975642	0.0224304	0.92218	-0.473251	-1.84401	-1.00155	+	Cluster -3	476	1.54315	0.0186871	sp|Q9BPX6|MICU1_HUMAN	Q9BPX6	MICU1_HUMAN	MICU1	Calcium uptake protein 1, mitochondrial
-0.224571	0.0129651	1.47084	0.82723	0.502875	0.770593	-0.653556	-1.64097	-1.06541	+	Cluster -3	419	1.66004	0.0160703	sp|Q8NCF5|NF2IP_HUMAN	Q8NCF5	NF2IP_HUMAN	NFATC2IP	NFATC2-interacting protein
-0.183621	-0.464152	1.87076	0.482654	0.295425	0.931019	-0.792808	-1.34103	-0.798245	+	Cluster -3	507	1.01809	0.0478818	sp|Q9UGQ3|GTR6_HUMAN	Q9UGQ3	GTR6_HUMAN	SLC2A6	Solute carrier family 2, facilitated glucose transporter member 6
0.361036	0.249012	2.22781	-0.00834842	-0.247747	0.0778204	-1.13746	-0.358106	-1.16401	+	Cluster -3	860	1.30107	0.02814	sp|Q9H9G7|AGO3_HUMAN	Q9H9G7	AGO3_HUMAN	AGO3	Protein argonaute-3
0.14474	0.164447	2.13439	0.428498	-0.389449	0.250009	-0.813684	-0.461811	-1.45714	+	Cluster -3	439	1.07979	0.0420922	sp|P29083|T2EA_HUMAN	P29083	T2EA_HUMAN	GTF2E1	General transcription factor IIE subunit 1
0.345406	-0.420522	1.90685	0.0472178	0.410938	0.719994	-1.41599	-0.570007	-1.02389	+	Cluster -3	676	1.11518	0.0389667	sp|Q9UQC2|GAB2_HUMAN	Q9UQC2	GAB2_HUMAN	GAB2	GRB2-associated-binding protein 2
-0.342189	-0.00387825	1.67619	0.149902	0.588893	0.998809	-1.45088	-0.424876	-1.19197	+	Cluster -3	805	1.16689	0.0352882	sp|P51798|CLCN7_HUMAN	P51798	CLCN7_HUMAN	CLCN7	H(+)/Cl(-) exchange transporter 7
0.739775	0.161018	1.44032	0.183018	0.59509	0.462977	-1.10223	-1.71971	-0.760251	+	Cluster -3	666	2.2875	0.00665415	sp|Q7Z5R6|AB1IP_HUMAN	Q7Z5R6	AB1IP_HUMAN	APBB1IP	Amyloid beta A4 precursor protein-binding family B member 1-interacting protein
0.891044	0.188631	1.28042	0.235356	0.762213	0.391199	-1.40951	-1.2661	-1.07325	+	Cluster -3	380	2.97455	0.00312542	sp|P50552|VASP_HUMAN	P50552	VASP_HUMAN	VASP	Vasodilator-stimulated phosphoprotein
0.643451	0.23216	1.45593	0.512664	0.575214	0.335784	-1.23033	-1.31098	-1.21388	+	Cluster -3	778	2.98081	0.00314676	sp|Q15057|ACAP2_HUMAN	Q15057	ACAP2_HUMAN	ACAP2	Arf-GAP with coiled-coil, ANK repeat and PH domain-containing protein 2
0.76516	0.0327623	1.7307	-0.00701045	0.791518	-0.131246	-1.43384	-1.18277	-0.565275	+	Cluster -3	713	1.59515	0.0174713	sp|Q99797|MIPEP_HUMAN	Q99797	MIPEP_HUMAN	MIPEP	Mitochondrial intermediate peptidase
0.364304	0.312481	1.72543	0.479665	0.633818	-0.0896045	-1.20481	-1.45276	-0.768521	+	Cluster -3	1056	1.93313	0.0106104	sp|Q9Y4G2|PKHM1_HUMAN	Q9Y4G2	PKHM1_HUMAN	PLEKHM1	Pleckstrin homology domain-containing family M member 1
0.268378	0.522943	1.50476	0.713704	0.493681	0.18268	-1.0534	-1.19722	-1.43552	+	Cluster -3	456	2.62192	0.00445415	sp|Q86UL3|GPAT4_HUMAN	Q86UL3	GPAT4_HUMAN	GPAT4	Glycerol-3-phosphate acyltransferase 4
0.175933	0.31289	1.42804	0.785873	0.585489	0.420591	-0.989413	-1.45468	-1.26472	+	Cluster -3	462	2.56192	0.00447012	sp|Q9NVC3|S38A7_HUMAN	Q9NVC3	S38A7_HUMAN	SLC38A7	Putative sodium-coupled neutral amino acid transporter 7
0.367801	0.639437	1.27099	0.39844	0.540451	0.636221	-1.22955	-1.43619	-1.1876	+	Cluster -3	627	3.62939	0.00252381	sp|P13796|PLSL_HUMAN	P13796	PLSL_HUMAN	LCP1	Plastin-2
0.0546229	0.517596	1.0014	0.719933	0.967009	0.559087	-1.02364	-1.35523	-1.44077	+	Cluster -3	676	3.31168	0.00268041	sp|Q05655|KPCD_HUMAN	Q05655	KPCD_HUMAN	PRKCD	Protein kinase C delta type
0.390392	0.0305761	1.95654	0.314991	0.20072	0.325549	-0.612363	-1.33048	-1.27592	+	Cluster -3	889	1.55436	0.0184032	sp|Q86VP3|PACS2_HUMAN	Q86VP3	PACS2_HUMAN	PACS2	Phosphofurin acidic cluster sorting protein 2
0.855604	0.376332	1.73708	-0.0884886	0.212806	0.156707	-0.513209	-1.47491	-1.26193	+	Cluster -3	517	2.16855	0.00790089	sp|Q8WUA7|TB22A_HUMAN	Q8WUA7	TB22A_HUMAN	TBC1D22A	TBC1 domain family member 22A
0.582614	0.561135	1.50606	0.178869	0.409533	0.282616	-0.51117	-1.56634	-1.44331	+	Cluster -3	2063	2.39321	0.00580424	sp|Q14686|NCOA6_HUMAN	Q14686	NCOA6_HUMAN	NCOA6	Nuclear receptor coactivator 6
0.349904	0.366686	1.69698	0.179147	0.0880596	0.712624	-0.772986	-0.932783	-1.68763	+	Cluster -3	749	1.87313	0.0114214	sp|Q99767|APBA2_HUMAN	Q99767	APBA2_HUMAN	APBA2	Amyloid-beta A4 precursor protein-binding family A member 2
0.70164	0.0445299	1.48441	0.0229472	0.254241	0.924278	-0.618879	-1.26029	-1.55288	+	Cluster -3	1077	1.8499	0.0116912	sp|Q13905|RPGF1_HUMAN	Q13905	RPGF1_HUMAN	RAPGEF1	Rap guanine nucleotide exchange factor 1
0.625133	0.452974	1.78816	-0.294974	0.0161212	0.61472	-1.42383	-0.631406	-1.1469	+	Cluster -3	1492	1.93911	0.0106706	sp|Q5T3U5|MRP7_HUMAN	Q5T3U5	MRP7_HUMAN	ABCC10	Multidrug resistance-associated protein 7
0.826567	0.68537	1.34896	-0.26036	0.36397	0.655618	-1.1181	-1.34335	-1.15867	+	Cluster -3	721	3.15333	0.00297143	sp|Q9H6R7|WDCP_HUMAN	Q9H6R7	WDCP_HUMAN	WDCP	WD repeat and coiled-coil-containing protein
0.736357	0.899897	1.08283	0.0158926	0.238939	0.754221	-1.00652	-1.10335	-1.61827	+	Cluster -3	563	3.45743	0.00299387	sp|Q8WYA6|CTBL1_HUMAN	Q8WYA6	CTBL1_HUMAN	CTNNBL1	Beta-catenin-like protein 1
1.13752	0.514003	1.26059	-0.0643344	0.368521	0.397325	-0.943477	-1.11154	-1.55862	+	Cluster -3	468	3.25779	0.00297115	sp|Q96GQ5|RUSF1_HUMAN	Q96GQ5	RUSF1_HUMAN	RUSF1	RUS family member 1
1.19439	0.441683	1.29593	-0.413506	0.397841	0.437438	-1.19247	-0.622025	-1.53929	+	Cluster -3	318	2.34176	0.00608749	sp|O75208|COQ9_HUMAN	O75208	COQ9_HUMAN	COQ9	Ubiquinone biosynthesis protein COQ9, mitochondrial
0.0477388	0.338487	1.59171	0.619107	-0.584	1.1423	-1.03553	-1.03464	-1.08518	+	Cluster -3	1432	1.31531	0.0273092	sp|Q14191|WRN_HUMAN	Q14191	WRN_HUMAN	WRN	Werner syndrome ATP-dependent helicase
0.841003	0.690595	1.37064	0.728522	-0.813612	0.361063	-1.03528	-1.42231	-0.720623	+	Cluster -3	251	1.94349	0.0106345	sp|Q9BSH5|HDHD3_HUMAN	Q9BSH5	HDHD3_HUMAN	HDHD3	Haloacid dehalogenase-like hydrolase domain-containing protein 3
0.534175	0.977356	1.25494	0.52764	-0.452287	0.694154	-0.996187	-1.30211	-1.23768	+	Cluster -3	833	2.60445	0.00449093	sp|Q9C0C4|SEM4C_HUMAN	Q9C0C4	SEM4C_HUMAN	SEMA4C	Semaphorin-4C
0.627202	0.884141	1.15243	-0.0181351	-0.112911	1.03549	-1.51667	-0.967505	-1.08404	+	Cluster -3	889	2.56389	0.004464	sp|Q6ZUM4|RHG27_HUMAN	Q6ZUM4	RHG27_HUMAN	ARHGAP27	Rho GTPase-activating protein 27
0.262018	0.948024	1.35897	0.269547	0.0957178	0.554103	-1.8512	-0.696485	-0.940701	+	Cluster -3	369	2.2144	0.00722812	sp|Q9NZJ6|COQ3_HUMAN	Q9NZJ6	COQ3_HUMAN	COQ3	Ubiquinone biosynthesis O-methyltransferase, mitochondrial
0.231323	1.12026	0.961305	0.393232	0.255415	0.62437	-1.94993	-0.910923	-0.725048	+	Cluster -3	234	2.27982	0.00680601	sp|Q14696|MESD_HUMAN	Q14696	MESD_HUMAN	MESD	LRP chaperone MESD
-0.503789	1.29081	1.06124	-0.194252	0.132866	1.16841	-1.60465	-0.523358	-0.82728	+	Cluster -3	636	1.06169	0.0437151	sp|Q6UWB1|I27RA_HUMAN	Q6UWB1	I27RA_HUMAN	IL27RA	Interleukin-27 receptor subunit alpha
-0.385781	1.3378	1.30762	0.253469	-0.551017	0.854202	-1.37336	-0.317169	-1.12576	+	Cluster -3	335	1.05826	0.0439349	sp|P25445|TNR6_HUMAN	P25445	TNR6_HUMAN	FAS	Tumor necrosis factor receptor superfamily member 6
-0.350809	1.16301	1.55149	-0.772927	0.558887	0.57508	-1.19634	-0.391681	-1.13671	+	Cluster -3	919	1.03332	0.0464419	sp|P98194|AT2C1_HUMAN	P98194	AT2C1_HUMAN	ATP2C1	Calcium-transporting ATPase type 2C member 1
0.201881	1.27031	0.646895	-0.0767027	0.481277	1.04993	-1.02274	-0.896081	-1.65477	+	Cluster -3	270	2.14577	0.00819367	sp|O00124|UBXN8_HUMAN	O00124	UBXN8_HUMAN	UBXN8	UBX domain-containing protein 8
0.561452	1.24546	0.789813	-0.158048	0.31681	0.805523	-0.920616	-0.871738	-1.76865	+	Cluster -3	531	2.45503	0.00504348	sp|Q9UKA9|PTBP2_HUMAN	Q9UKA9	PTBP2_HUMAN	PTBP2	Polypyrimidine tract-binding protein 2
0.0642485	0.760152	1.52675	-0.37377	0.392209	0.925158	-0.762881	-0.991667	-1.5402	+	Cluster -3	725	1.6573	0.0160656	sp|Q96T83|SL9A7_HUMAN	Q96T83	SL9A7_HUMAN	SLC9A7	Sodium/hydrogen exchanger 7
0.470158	1.15066	1.22852	-0.566608	0.0624537	0.820687	-0.639155	-0.847131	-1.67959	+	Cluster -3	277	1.85976	0.0115932	sp|P20645|MPRD_HUMAN	P20645	MPRD_HUMAN	M6PR	Cation-dependent mannose-6-phosphate receptor
0.206599	0.889098	0.722685	-0.284766	0.227144	1.52316	-0.474754	-1.30272	-1.50645	+	Cluster -3	198	1.47079	0.0209812	sp|Q9P000|COMD9_HUMAN	Q9P000	COMD9_HUMAN	COMMD9	COMM domain-containing protein 9
0.609948	0.61333	1.23388	-0.455432	-0.237383	1.33746	-0.53387	-1.50149	-1.06644	+	Cluster -3	927	1.44352	0.0221552	sp|Q9HCG7|GBA2_HUMAN	Q9HCG7	GBA2_HUMAN	GBA2	Non-lysosomal glucosylceramidase
0.385086	1.23514	0.99305	0.0757107	0.789502	0.248555	-1.19385	-1.35426	-1.17894	+	Cluster -3	673	3.21206	0.00303356	sp|O43524|FOXO3_HUMAN	O43524	FOXO3_HUMAN	FOXO3	Forkhead box protein O3
0.407759	1.17049	0.707832	0.372397	0.796878	0.377787	-1.35418	-1.50388	-0.975081	+	Cluster -3	158	3.45893	0.00300308	sp|Q96K17|BT3L4_HUMAN	Q96K17	BT3L4_HUMAN	BTF3L4	Transcription factor BTF3 homolog 4
0.531058	1.25787	0.73323	-0.162813	0.916198	0.339045	-1.62251	-1.01166	-0.980428	+	Cluster -3	441	2.55388	0.00447431	sp|Q03181|PPARD_HUMAN	Q03181	PPARD_HUMAN	PPARD	Peroxisome proliferator-activated receptor delta
0.657272	0.801159	0.758625	-0.173388	0.859602	0.860618	-1.41272	-1.37709	-0.974074	+	Cluster -3	488	2.93378	0.00327796	sp|Q9BR77|CCD77_HUMAN	Q9BR77	CCD77_HUMAN	CCDC77	Coiled-coil domain-containing protein 77
0.413802	1.13084	0.956543	-0.458577	0.425964	0.977181	-1.59184	-1.06098	-0.792934	+	Cluster -3	327	2.0493	0.00925543	sp|Q5HYK3|COQ5_HUMAN	Q5HYK3	COQ5_HUMAN	COQ5	2-methoxy-6-polyprenyl-1,4-benzoquinol methylase, mitochondrial
-0.297975	1.34646	0.921384	-0.318126	0.866935	0.695339	-1.16754	-1.50066	-0.545816	+	Cluster -3	490	1.39256	0.0240941	sp|Q8TD55|PKHO2_HUMAN	Q8TD55	PKHO2_HUMAN	PLEKHO2	Pleckstrin homology domain-containing family O member 2
-0.362542	1.1775	0.912159	0.33797	0.604138	0.912719	-1.22273	-1.00677	-1.35244	+	Cluster -3	1216	2.11155	0.00861649	sp|Q9P260|RELCH_HUMAN	Q9P260	RELCH_HUMAN	RELCH	RAB11-binding protein RELCH
-0.0163996	1.19185	1.11656	0.239109	0.718273	0.422942	-1.40575	-1.26692	-0.999668	+	Cluster -3	797	2.56342	0.00445954	sp|Q9Y446|PKP3_HUMAN	Q9Y446	PKP3_HUMAN	PKP3	Plakophilin-3
-0.18405	1.20234	1.04279	0.181006	0.560602	0.814582	-1.34649	-1.26043	-1.01035	+	Cluster -3	655	2.25681	0.00688223	sp|P49748|ACADV_HUMAN	P49748	ACADV_HUMAN	ACADVL	Very long-chain specific acyl-CoA dehydrogenase, mitochondrial
-0.21608	1.57644	1.25016	0.332383	0.201704	0.1871	-1.12197	-1.20177	-1.00796	+	Cluster -3	395	1.90429	0.0109093	sp|Q13510|ASAH1_HUMAN	Q13510	ASAH1_HUMAN	ASAH1	Acid ceramidase
-0.180196	1.7443	0.685918	0.388595	0.542796	0.213304	-1.03551	-0.947087	-1.41212	+	Cluster -3	386	1.78401	0.013065	sp|O60711|LPXN_HUMAN	O60711	LPXN_HUMAN	LPXN	Leupaxin
0.109156	0.803994	1.41828	0.141213	0.919889	0.179983	-0.850961	-1.31557	-1.40598	+	Cluster -3	515	2.252	0.00697357	sp|Q9UK23|NAGPA_HUMAN	Q9UK23	NAGPA_HUMAN	NAGPA	N-acetylglucosamine-1-phosphodiester alpha-N-acetylglucosaminidase
-0.0337741	1.2435	1.14014	0.241136	0.476983	0.476284	-0.685359	-1.22486	-1.63405	+	Cluster -3	161	2.184	0.00761966	sp|Q96B96|LDAF1_HUMAN	Q96B96	LDAF1_HUMAN	TMEM159	Lipid droplet assembly factor 1
0.358297	1.05558	1.37099	-0.364756	0.522354	0.544734	-0.900802	-1.39055	-1.19585	+	Cluster -3	305	2.4751	0.0049623	sp|Q9UHQ9|NB5R1_HUMAN	Q9UHQ9	NB5R1_HUMAN	CYB5R1	NADH-cytochrome b5 reductase 1
0.310076	1.22892	1.34028	-0.0832178	0.196828	0.46312	-0.786698	-1.61356	-1.05575	+	Cluster -3	823	2.53358	0.00454545	sp|A6ND36|FA83G_HUMAN	A6ND36	FA83G_HUMAN	FAM83G	Protein FAM83G
0.851268	0.318301	1.3184	-0.253332	0.650396	-0.0710926	-2.12933	-0.638284	-0.0463206	+	Cluster -3	735	1.16888	0.0351746	sp|P23743|DGKA_HUMAN	P23743	DGKA_HUMAN	DGKA	Diacylglycerol kinase alpha
0.797564	0.197199	1.27494	0.028339	0.945983	0.184452	-1.624	-1.40441	-0.400067	+	Cluster -3	248	1.86136	0.0115695	sp|Q9Y3Y2|CHTOP_HUMAN	Q9Y3Y2	CHTOP_HUMAN	CHTOP	Chromatin target of PRMT1 protein
0.851364	0.18294	0.937324	0.0452074	0.922624	0.224265	-1.70082	-1.59653	0.133629	+	Cluster -3	729	1.32471	0.0268781	sp|Q9UBB6|NCDN_HUMAN	Q9UBB6	NCDN_HUMAN	NCDN	Neurochondrin
0.149959	0.280115	0.956839	0.118053	1.27755	0.513109	-1.53506	-1.64447	-0.116098	+	Cluster -3	919	1.50298	0.01996	sp|O94967|WDR47_HUMAN	O94967	WDR47_HUMAN	WDR47	WD repeat-containing protein 47
0.0303569	0.139541	1.24378	0.00475278	-0.0315048	1.55618	-1.2226	-1.57966	-0.14085	+	Cluster -3	313	1.0164	0.0480957	sp|Q9Y6I9|TX264_HUMAN	Q9Y6I9	TX264_HUMAN	TEX264	Testis-expressed protein 264
0.631625	0.0815426	1.16546	-0.0334627	0.306688	1.29879	-1.57066	-1.27159	-0.608396	+	Cluster -3	269	1.78624	0.0130351	sp|O95297|MPZL1_HUMAN	O95297	MPZL1_HUMAN	MPZL1	Myelin protein zero-like protein 1
0.775922	0.496233	0.98107	0.539952	-0.48988	0.684932	-1.19939	-1.93125	0.142408	+	Cluster -3	323	1.21389	0.0326703	sp|Q7Z624|CMKMT_HUMAN	Q7Z624	CMKMT_HUMAN	CAMKMT	Calmodulin-lysine N-methyltransferase
0.181273	1.0326	1.13766	0.248113	-0.224135	0.622441	-0.924778	-2.06204	-0.0111384	+	Cluster -3	464	1.26858	0.0295625	sp|P04424|ARLY_HUMAN	P04424	ARLY_HUMAN	ASL	Argininosuccinate lyase
0.806646	-0.128722	1.15808	0.515396	0.0702654	0.521286	-1.56141	-1.70491	0.323369	+	Cluster -3	4069	1.04728	0.0449635	sp|Q8N3K9|CMYA5_HUMAN	Q8N3K9	CMYA5_HUMAN	CMYA5	Cardiomyopathy-associated protein 5
0.899085	0.881222	0.146152	-0.58415	0.639715	1.09487	-1.47878	-1.49933	-0.0987794	+	Cluster -3	1490	1.20773	0.032954	sp|Q9NYV4|CDK12_HUMAN	Q9NYV4	CDK12_HUMAN	CDK12	Cyclin-dependent kinase 12
0.270714	0.775115	0.471668	-0.0930401	0.644258	1.10813	-1.52016	-1.76871	0.112024	+	Cluster -3	1171	1.29959	0.0281894	sp|O75132|ZBED4_HUMAN	O75132	ZBED4_HUMAN	ZBED4	Zinc finger BED domain-containing protein 4
0.434551	0.24716	-0.308581	0.60213	1.02245	1.32416	-1.50755	-1.4433	-0.37102	+	Cluster -3	199	2.29251	0.00662882	sp|Q9BUL9|RPP25_HUMAN	Q9BUL9	RPP25_HUMAN	RPP25	Ribonuclease P protein subunit p25
0.77828	0.171409	-0.117199	0.0645239	0.760474	1.56396	-1.56497	-1.32904	-0.327432	+	Cluster -3	333	1.56464	0.0181423	sp|P52799|EFNB2_HUMAN	P52799	EFNB2_HUMAN	EFNB2	Ephrin-B2
0.867985	1.59941	-0.0991792	-0.0211594	-0.258596	0.666564	-1.19986	-1.64882	0.0936546	+	Cluster -3	505	1.05837	0.0439657	sp|Q9Y3I0|RTCB_HUMAN	Q9Y3I0	RTCB_HUMAN	RTCB	RNA-splicing ligase RtcB homolog
0.319148	1.18379	0.376711	0.39045	0.650882	0.367418	-1.39718	-1.92114	0.029916	+	Cluster -3	359	1.48646	0.0205541	sp|Q92187|SIA8D_HUMAN	Q92187	SIA8D_HUMAN	ST8SIA4	CMP-N-acetylneuraminate-poly-alpha-2,8-sialyltransferase
0.7811	1.22268	0.188188	0.362711	0.51715	0.526689	-1.37489	-1.75234	-0.471292	+	Cluster -3	103	2.25009	0.00700556	sp|P62805|H4_HUMAN	P62805	H4_HUMAN	H4C1	Histone H4
-0.060021	1.0619	0.275681	1.19329	0.612339	0.255054	-1.5204	-1.60352	-0.21432	+	Cluster -3	574	1.60951	0.0171496	sp|Q14534|ERG1_HUMAN	Q14534	ERG1_HUMAN	SQLE	Squalene monooxygenase
0.202724	1.50154	-0.0112501	0.797917	0.312336	0.448779	-1.69002	-1.3694	-0.192624	+	Cluster -3	851	1.41079	0.0233425	sp|Q9H8H2|DDX31_HUMAN	Q9H8H2	DDX31_HUMAN	DDX31	Probable ATP-dependent RNA helicase DDX31
0.455326	0.788681	0.661202	0.393636	0.13865	1.11869	-1.79104	-1.40321	-0.361934	+	Cluster -3	300	2.04425	0.0093105	sp|Q8NBQ5|DHB11_HUMAN	Q8NBQ5	DHB11_HUMAN	HSD17B11	Estradiol 17-beta-dehydrogenase 11
0.138554	1.12741	0.450005	0.615935	-0.0832241	1.1797	-1.41236	-1.6006	-0.415423	+	Cluster -3	387	1.72836	0.0143835	sp|A4D1E9|GTPBA_HUMAN	A4D1E9	GTPBA_HUMAN	GTPBP10	GTP-binding protein 10
0.211577	0.136675	1.3129	-0.281971	0.98597	0.986242	-0.887988	-0.804013	-1.65939	+	Cluster -3	1151	1.57738	0.0178352	sp|Q5T5C0|STXB5_HUMAN	Q5T5C0	STXB5_HUMAN	STXBP5	Syntaxin-binding protein 5
0.465044	0.612912	1.31456	-0.520698	1.08982	0.253024	-1.04574	-0.488033	-1.68089	+	Cluster -3	872	1.55677	0.0183417	sp|Q8NDZ2|SIMC1_HUMAN	Q8NDZ2	SIMC1_HUMAN	SIMC1	SUMO-interacting motif-containing protein 1
0.713409	0.461789	1.16919	-0.667906	0.614451	0.649263	-0.862863	-0.0996775	-1.97766	+	Cluster -3	594	1.2069	0.0330114	sp|Q92529|SHC3_HUMAN	Q92529	SHC3_HUMAN	SHC3	SHC-transforming protein 3
0.576989	0.986848	0.694578	-0.980387	1.19039	0.636291	-0.877361	-0.815811	-1.41153	+	Cluster -3	1256	1.34562	0.0257489	sp|Q1MSJ5|CSPP1_HUMAN	Q1MSJ5	CSPP1_HUMAN	CSPP1	Centrosome and spindle pole-associated protein 1
1.16855	0.790663	0.81418	-0.946318	1.02585	0.0343156	-0.464062	-0.860753	-1.56242	+	Cluster -3	482	1.43802	0.0222622	sp|Q9UBS0|KS6B2_HUMAN	Q9UBS0	KS6B2_HUMAN	RPS6KB2	Ribosomal protein S6 kinase beta-2
1.3669	0.923679	0.644712	-0.537594	0.698498	0.144614	-1.02959	-0.576402	-1.63482	+	Cluster -3	333	2.10021	0.00871074	sp|Q15390|MTFR1_HUMAN	Q15390	MTFR1_HUMAN	MTFR1	Mitochondrial fission regulator 1
1.37646	0.554754	0.380234	-0.484648	0.862393	0.476279	-0.46569	-0.808455	-1.89133	+	Cluster -3	296	1.44649	0.0220238	sp|P49069|CAMLG_HUMAN	P49069	CAMLG_HUMAN	CAMLG	Calcium signal-modulating cyclophilin ligand
1.10747	0.69284	0.266081	-0.638411	1.02969	0.860705	-0.696282	-1.09712	-1.52497	+	Cluster -3	1304	1.57755	0.0178472	sp|O75533|SF3B1_HUMAN	O75533	SF3B1_HUMAN	SF3B1	Splicing factor 3B subunit 1
1.34949	0.639507	0.431127	0.0570234	0.00878888	0.364462	-0.0569497	-0.51839	-2.27506	+	Cluster -3	116	1.16257	0.0355619	sp|Q52LA3|LIN52_HUMAN	Q52LA3	LIN52_HUMAN	LIN52	Protein lin-52 homolog
1.40103	0.512313	0.812835	-0.514034	-0.361037	0.815044	-0.339064	-0.378537	-1.94855	+	Cluster -3	340	1.21351	0.0326787	sp|Q9H649|NSUN3_HUMAN	Q9H649	NSUN3_HUMAN	NSUN3	tRNA (cytosine(34)-C(5))-methyltransferase, mitochondrial
1.04326	0.549342	0.679352	-0.392516	0.360597	0.568658	0.344616	-1.10209	-2.05122	+	Cluster -3	153	1.05719	0.044012	sp|Q9NX24|NHP2_HUMAN	Q9NX24	NHP2_HUMAN	NHP2	H/ACA ribonucleoprotein complex subunit 2
0.865356	0.892325	1.49351	-0.558141	0.308254	-0.529374	-1.54315	0.137667	-1.06644	+	Cluster -3	488	1.66006	0.0160762	sp|Q9NV64|TM39A_HUMAN	Q9NV64	TM39A_HUMAN	TMEM39A	Transmembrane protein 39A
1.3561	0.641793	1.08535	-0.520414	0.000531966	0.39981	-1.07572	-0.168486	-1.71897	+	Cluster -3	147	1.8733	0.0114049	sp|P49789|FHIT_HUMAN	P49789	FHIT_HUMAN	FHIT	Bis(5'-adenosyl)-triphosphatase
1.24949	0.487235	1.16654	-0.809306	0.18399	0.0141075	-1.36781	0.500557	-1.4248	+	Cluster -3	794	1.14796	0.0363797	sp|O94874|UFL1_HUMAN	O94874	UFL1_HUMAN	UFL1	E3 UFM1-protein ligase 1
0.97343	0.872645	0.926797	-0.9337	0.906552	-0.440689	-0.304146	-0.149019	-1.85187	+	Cluster -3	760	1.04288	0.0454804	sp|P18074|ERCC2_HUMAN	P18074	ERCC2_HUMAN	ERCC2	General transcription and DNA repair factor IIH helicase subunit XPD
1.12891	0.937657	0.917204	-0.471218	0.357875	-0.548521	-0.410114	0.130017	-2.04181	+	Cluster -3	855	1.23971	0.0309648	sp|Q9HCS7|SYF1_HUMAN	Q9HCS7	SYF1_HUMAN	XAB2	Pre-mRNA-splicing factor SYF1
0.359308	0.767972	1.30948	0.735002	0.594793	-0.391029	-1.3751	-0.43997	-1.56045	+	Cluster -3	161	1.85332	0.0116894	sp|Q16514|TAF12_HUMAN	Q16514	TAF12_HUMAN	TAF12	Transcription initiation factor TFIID subunit 12
0.889995	-0.157166	1.72107	0.598347	0.0159984	-0.197	-0.999307	-0.203389	-1.66855	+	Cluster -3	2017	1.19924	0.0334954	sp|Q5TZA2|CROCC_HUMAN	Q5TZA2	CROCC_HUMAN	CROCC	Rootletin
0.846803	-0.0385305	1.58664	0.50892	0.157524	-0.137699	-0.499344	-0.414276	-2.01004	+	Cluster -3	1363	1.21613	0.0325357	sp|Q2KHR2|RFX7_HUMAN	Q2KHR2	RFX7_HUMAN	RFX7	DNA-binding protein RFX7
0.568757	-0.251385	1.73989	0.815877	0.467176	-0.298102	-0.670087	-0.76725	-1.60488	+	Cluster -3	298	1.20165	0.0333372	sp|P36542|ATPG_HUMAN	P36542	ATPG_HUMAN	ATP5F1C	ATP synthase subunit gamma, mitochondrial
1.50471	0.0173087	1.29735	-0.0560335	0.527797	-0.599774	-1.2208	-0.087456	-1.38311	+	Cluster -3	719	1.30847	0.0277403	sp|Q96T68|SETB2_HUMAN	Q96T68	SETB2_HUMAN	SETDB2	Histone-lysine N-methyltransferase SETDB2
0.74647	-0.0225771	1.56381	0.378193	0.679256	-0.476736	-1.41206	0.0170395	-1.47339	+	Cluster -3	1202	1.11465	0.0389744	sp|Q8WXE0|CSKI2_HUMAN	Q8WXE0	CSKI2_HUMAN	CASKIN2	Caskin-2
0.346298	-0.301054	1.47664	0.619439	1.22069	-0.355628	-1.57532	-0.488482	-0.942582	+	Cluster -3	179	1.08431	0.0417424	sp|Q9Y6M9|NDUB9_HUMAN	Q9Y6M9	NDUB9_HUMAN	NDUFB9	NADH dehydrogenase [ubiquinone] 1 beta subcomplex subunit 9
1.56206	1.02445	0.487092	0.348113	0.220495	-0.805759	-1.49665	-0.271985	-1.06781	+	Cluster -3	450	1.71169	0.0148205	sp|Q86X95|CIR1_HUMAN	Q86X95	CIR1_HUMAN	CIR1	Corepressor interacting with RBPJ 1
1.57597	0.795811	0.462109	-0.174987	0.642756	-0.561684	-1.27404	0.0456774	-1.51161	+	Cluster -3	416	1.35963	0.0251392	sp|Q9Y6K0|CEPT1_HUMAN	Q9Y6K0	CEPT1_HUMAN	CEPT1	Choline/ethanolaminephosphotransferase 1
1.41926	0.737729	0.920485	0.209896	0.397505	-0.500036	-1.23689	-0.376105	-1.57185	+	Cluster -3	338	2.21788	0.00718242	sp|P40926|MDHM_HUMAN	P40926	MDHM_HUMAN	MDH2	Malate dehydrogenase, mitochondrial
1.58149	0.904762	0.323418	0.174949	0.0420148	-0.292698	-1.15304	0.178714	-1.75961	+	Cluster -3	160	1.33326	0.0264157	sp|O95562|SFT2B_HUMAN	O95562	SFT2B_HUMAN	SFT2D2	Vesicle transport protein SFT2B
1.68687	0.79094	-0.0574563	0.0454486	0.242944	-0.0564142	-0.946404	0.174297	-1.88023	+	Cluster -3	475	1.01017	0.0488928	sp|P26368|U2AF2_HUMAN	P26368	U2AF2_HUMAN	U2AF2	Splicing factor U2AF 65 kDa subunit
0.992246	0.467091	1.01694	0.74965	-0.105039	-0.352853	-0.839643	0.154116	-2.08251	+	Cluster -3	390	1.12498	0.0380955	sp|P58317|ZN121_HUMAN	P58317	ZN121_HUMAN	ZNF121	Zinc finger protein 121
1.42444	0.659743	0.791445	0.205019	-0.12872	-0.375666	-0.631461	0.127533	-2.07234	+	Cluster -3	723	1.27733	0.0292483	sp|Q8N1B4|VPS52_HUMAN	Q8N1B4	VPS52_HUMAN	VPS52	Vacuolar protein sorting-associated protein 52 homolog
1.06585	0.899105	1.41936	0.482707	-0.431993	-0.294228	-0.898654	-0.794247	-1.4479	+	Cluster -3	487	2.88447	0.00349091	sp|Q8NDZ6|T161B_HUMAN	Q8NDZ6	T161B_HUMAN	TMEM161B	Transmembrane protein 161B
1.23218	0.715375	1.48323	0.241354	-0.221673	-0.684001	-0.909134	-0.361479	-1.49585	+	Cluster -3	151	2.29118	0.00660479	sp|P61916|NPC2_HUMAN	P61916	NPC2_HUMAN	NPC2	NPC intracellular cholesterol transporter 2
1.59434	0.709692	1.08065	0.205016	-0.58277	-0.189872	-0.783273	-0.430703	-1.60308	+	Cluster -3	654	2.24451	0.00703097	sp|Q96JX3|SRAC1_HUMAN	Q96JX3	SRAC1_HUMAN	SERAC1	Protein SERAC1
1.43753	0.914601	1.13504	-0.13051	-0.393617	-0.0971117	-0.871762	-0.334143	-1.66003	+	Cluster -3	488	2.60894	0.0045296	sp|Q96EW2|HBAP1_HUMAN	Q96EW2	HBAP1_HUMAN	HSPBAP1	HSPB1-associated protein 1
1.38732	1.22664	0.749102	-0.120795	-0.519053	0.128983	-0.998123	-0.222102	-1.63197	+	Cluster -3	619	2.2421	0.00707397	sp|P32519|ELF1_HUMAN	P32519	ELF1_HUMAN	ELF1	ETS-related transcription factor Elf-1
1.24109	0.238214	1.1035	0.979079	-0.63358	0.0661152	-1.16348	-0.286586	-1.54435	+	Cluster -3	1132	1.40028	0.0237051	sp|P46379|BAG6_HUMAN	P46379	BAG6_HUMAN	BAG6	Large proline-rich protein BAG6
1.23083	0.351911	1.33169	0.586611	0.0723782	-0.217178	-1.14135	-0.640684	-1.57421	+	Cluster -3	1342	2.31939	0.00638253	sp|Q8NEZ3|WDR19_HUMAN	Q8NEZ3	WDR19_HUMAN	WDR19	WD repeat-containing protein 19
0.869328	0.186201	1.32974	0.981409	-0.00409367	-0.109319	-1.54996	-0.297902	-1.4054	+	Cluster -3	743	1.6103	0.0171317	sp|P14859|PO2F1_HUMAN	P14859	PO2F1_HUMAN	POU2F1	POU domain, class 2, transcription factor 1
1.54751	0.443557	1.29706	0.541607	-0.381865	-0.660645	-1.34602	-0.730779	-0.710427	+	Cluster -3	980	2.00048	0.0097065	sp|Q9P0K7|RAI14_HUMAN	Q9P0K7	RAI14_HUMAN	RAI14	Ankycorbin
1.75363	0.171285	1.20275	0.293177	-0.162232	-0.265586	-1.28212	-0.573855	-1.13705	+	Cluster -3	1849	1.9823	0.0100195	sp|Q86WG5|MTMRD_HUMAN	Q86WG5	MTMRD_HUMAN	SBF2	Myotubularin-related protein 13
1.4665	-0.0148082	1.1215	0.805597	-0.287969	-0.514087	-1.69924	-0.0370091	-0.840478	+	Cluster -3	262	1.04773	0.0449086	sp|Q9Y657|SPIN1_HUMAN	Q9Y657	SPIN1_HUMAN	SPIN1	Spindlin-1
1.15202	0.800789	0.910518	1.13863	-0.28586	-0.739898	-0.577618	-1.01673	-1.38185	+	Cluster -3	356	1.61828	0.0169093	sp|Q9NUU6|OTULL_HUMAN	Q9NUU6	OTULL_HUMAN	OTULINL	Inactive ubiquitin thioesterase OTULINL
1.50862	0.471616	1.16495	0.508773	0.185751	-1.11398	-0.621664	-0.980561	-1.1235	+	Cluster -3	294	1.70144	0.0150478	sp|Q9UL40|ZN346_HUMAN	Q9UL40	ZN346_HUMAN	ZNF346	Zinc finger protein 346
1.43531	0.43494	1.22141	0.768973	-0.163284	-0.740076	-0.655257	-1.06682	-1.2352	+	Cluster -3	407	1.87802	0.0113687	sp|Q96EP5|DAZP1_HUMAN	Q96EP5	DAZP1_HUMAN	DAZAP1	DAZ-associated protein 1
0.91627	0.434656	1.04482	1.17114	0.236749	-1.14691	-0.577935	-0.472748	-1.60604	+	Cluster -3	412	1.00067	0.0499433	sp|Q3ZCT1|ZN260_HUMAN	Q3ZCT1	ZN260_HUMAN	ZNF260	Zinc finger protein 260
2.21329	0.304477	0.483027	-0.531209	0.33404	-0.676926	-1.13623	-0.761511	-0.22896	+	Cluster -3	370	1.1792	0.0345461	sp|Q14012|KCC1A_HUMAN	Q14012	KCC1A_HUMAN	CAMK1	Calcium/calmodulin-dependent protein kinase type 1
1.86935	0.400666	0.497941	-0.312753	0.400076	-0.236828	-1.54626	-1.17538	0.103188	+	Cluster -3	647	1.21299	0.032695	sp|Q9BTA9|WAC_HUMAN	Q9BTA9	WAC_HUMAN	WAC	WW domain-containing adapter protein with coiled-coil
1.69676	0.22384	0.769897	-0.107171	0.794982	-0.388716	-1.10313	-1.52945	-0.357022	+	Cluster -3	492	1.47541	0.0208552	sp|Q9H9L4|KANL2_HUMAN	Q9H9L4	KANL2_HUMAN	KANSL2	KAT8 regulatory NSL complex subunit 2
1.69303	-0.478699	0.815279	-0.166342	0.955467	0.187353	-1.00847	-1.35369	-0.643926	+	Cluster -3	517	1.15496	0.035912	sp|O75143|ATG13_HUMAN	O75143	ATG13_HUMAN	ATG13	Autophagy-related protein 13
1.20474	0.324664	1.24939	0.179267	0.305068	-0.205582	-0.276289	-2.01141	-0.769847	+	Cluster -3	331	1.63317	0.0167455	sp|O95278|EPM2A_HUMAN	O95278	EPM2A_HUMAN	EPM2A	Laforin
0.890263	0.123258	1.26897	0.523313	0.49531	-0.101119	-0.165812	-1.97639	-1.0578	+	Cluster -3	1074	1.47974	0.0208086	sp|Q9C0D4|Z518B_HUMAN	Q9C0D4	Z518B_HUMAN	ZNF518B	Zinc finger protein 518B
1.62494	-0.414268	1.0412	0.609083	0.408936	-0.428712	-0.434012	-1.58846	-0.818709	+	Cluster -3	557	1.07589	0.0424779	sp|Q9ULM6|CNOT6_HUMAN	Q9ULM6	CNOT6_HUMAN	CNOT6	CCR4-NOT transcription complex subunit 6
1.70271	0.195346	1.09015	0.0882981	0.510341	-1.19162	-0.609693	-1.2246	-0.560928	+	Cluster -3	1575	1.28052	0.0291721	sp|Q13576|IQGA2_HUMAN	Q13576	IQGA2_HUMAN	IQGAP2	Ras GTPase-activating-like protein IQGAP2
1.67874	0.0974948	0.570903	0.643431	0.707282	-0.883565	-0.685502	-1.5203	-0.608484	+	Cluster -3	455	1.09549	0.0406476	sp|B7ZAQ6|GPHRA_HUMAN	B7ZAQ6	GPHRA_HUMAN	GPR89A	Golgi pH regulator A
1.80088	-0.185885	1.04939	-0.819563	-0.0742648	0.822598	-0.977796	-0.751105	-0.864257	+	Cluster -3	954	1.11848	0.0385474	sp|Q5T7W0|ZN618_HUMAN	Q5T7W0	ZN618_HUMAN	ZNF618	Zinc finger protein 618
1.34648	0.214281	1.2114	-0.738092	-0.189701	1.08055	-1.16041	-0.986927	-0.77759	+	Cluster -3	482	1.47499	0.0208483	sp|P86790|CCZ1B_HUMAN	P86790	CCZ1B_HUMAN	CCZ1B	Vacuolar fusion protein CCZ1 homolog B
1.00214	-0.379267	1.50609	-0.113732	-0.1625	1.03873	-0.63355	-0.621628	-1.63629	+	Cluster -3	934	1.0739	0.0426435	sp|Q9BZF3|OSBL6_HUMAN	Q9BZF3	OSBL6_HUMAN	OSBPL6	Oxysterol-binding protein-related protein 6
1.40087	-0.0370465	1.10028	0.197156	-0.491153	0.998709	-1.05737	-0.738756	-1.37269	+	Cluster -3	213	1.53466	0.0189438	sp|Q969F1|TF3C6_HUMAN	Q969F1	TF3C6_HUMAN	GTF3C6	General transcription factor 3C polypeptide 6
1.53064	0.615508	1.28348	-0.584203	-0.570895	0.469889	-0.999509	-0.539601	-1.20531	+	Cluster -3	561	2.25967	0.00686233	sp|Q9Y2W6|TDRKH_HUMAN	Q9Y2W6	TDRKH_HUMAN	TDRKH	Tudor and KH domain-containing protein
0.894377	0.689444	1.4586	-0.324118	-0.722046	0.819472	-0.963919	-0.353381	-1.49843	+	Cluster -3	419	1.65003	0.0163172	sp|Q9Y276|BCS1_HUMAN	Q9Y276	BCS1_HUMAN	BCS1L	Mitochondrial chaperone BCS1
1.14914	0.528956	1.62578	-0.112613	-0.475249	0.267433	-1.17997	-0.439217	-1.36427	+	Cluster -3	356	2.30842	0.00645056	sp|Q5T440|CAF17_HUMAN	Q5T440	CAF17_HUMAN	IBA57	Putative transferase CAF17, mitochondrial
1.45769	0.103201	1.58863	-0.242439	-0.647561	0.525181	-0.95662	-0.933659	-0.894419	+	Cluster -3	1914	1.76495	0.0134576	sp|Q13129|RLF_HUMAN	Q13129	RLF_HUMAN	RLF	Zinc finger protein Rlf
1.60312	-0.120195	1.35354	-0.317203	-0.231241	0.658876	-1.23557	-0.90219	-0.809139	+	Cluster -3	191	1.55817	0.0183701	sp|Q969E8|TSR2_HUMAN	Q969E8	TSR2_HUMAN	TSR2	Pre-rRNA-processing protein TSR2 homolog
1.48061	0.229623	1.50919	-0.134007	-0.204277	0.24738	-0.879056	-0.960826	-1.28864	+	Cluster -3	421	2.38785	0.00596759	sp|Q8TBX8|PI42C_HUMAN	Q8TBX8	PI42C_HUMAN	PIP4K2C	Phosphatidylinositol 5-phosphate 4-kinase type-2 gamma
1.39106	0.376538	1.32425	-0.251505	-0.40137	0.612978	-0.545057	-0.998361	-1.50852	+	Cluster -3	587	2.01166	0.00962766	sp|Q96IT1|ZN496_HUMAN	Q96IT1	ZN496_HUMAN	ZNF496	Zinc finger protein 496
1.80058	0.187399	0.730931	0.0491776	-0.0226591	0.460198	-1.31815	-0.46675	-1.42073	+	Cluster -3	989	1.78579	0.0130243	sp|O75448|MED24_HUMAN	O75448	MED24_HUMAN	MED24	Mediator of RNA polymerase II transcription subunit 24
1.91674	-0.478002	0.903659	0.188331	-0.0326232	0.417831	-1.16203	-0.575689	-1.17821	+	Cluster -3	993	1.18279	0.0344304	sp|Q8N8A2|ANR44_HUMAN	Q8N8A2	ANR44_HUMAN	ANKRD44	Serine/threonine-protein phosphatase 6 regulatory ankyrin repeat subunit B
1.80424	-0.414197	1.09705	-0.0904171	-0.404537	0.692387	-1.21709	-0.450536	-1.01691	+	Cluster -3	407	1.06858	0.0430797	sp|A6NJ78|MET15_HUMAN	A6NJ78	MET15_HUMAN	METTL15	12S rRNA N4-methylcytidine (m4C) methyltransferase
1.60735	-0.634275	1.32708	0.000173922	-0.18338	0.625999	-1.23275	-1.04444	-0.465754	+	Cluster -3	784	1.01771	0.0479521	sp|Q9H1K0|RBNS5_HUMAN	Q9H1K0	RBNS5_HUMAN	RBSN	Rabenosyn-5
1.22798	-0.0549498	1.71462	-0.00753145	0.172094	0.149443	-1.13398	-0.842044	-1.22563	+	Cluster -3	496	1.96479	0.0102182	sp|P11169|GTR3_HUMAN	P11169	GTR3_HUMAN	SLC2A3	Solute carrier family 2, facilitated glucose transporter member 3
1.13039	-0.292892	1.95639	0.176368	0.0865552	-0.222246	-0.909438	-0.819586	-1.10553	+	Cluster -3	316	1.4059	0.0235186	sp|P49918|CDN1C_HUMAN	P49918	CDN1C_HUMAN	CDKN1C	Cyclin-dependent kinase inhibitor 1C
0.78064	0.218922	2.00021	-0.273705	0.362155	-0.0875922	-1.25454	-0.750932	-0.995152	+	Cluster -3	548	1.8067	0.0126929	sp|P32780|TF2H1_HUMAN	P32780	TF2H1_HUMAN	GTF2H1	General transcription factor IIH subunit 1
1.73147	-0.283188	0.969245	0.689109	-0.271011	-0.0383944	-0.454809	-0.680171	-1.66225	+	Cluster -3	185	1.11651	0.0388218	sp|P83916|CBX1_HUMAN	P83916	CBX1_HUMAN	CBX1	Chromobox protein homolog 1
1.17203	-0.442642	1.54926	0.663158	0.216303	-0.132363	-0.741248	-0.713752	-1.57074	+	Cluster -3	626	1.2643	0.0297299	sp|Q8IYK4|GT252_HUMAN	Q8IYK4	GT252_HUMAN	COLGALT2	Procollagen galactosyltransferase 2
1.50299	-0.466037	1.16879	0.546481	0.381848	0.0413215	-0.767824	-0.869216	-1.53835	+	Cluster -3	646	1.41335	0.0232152	sp|Q6PCB7|S27A1_HUMAN	Q6PCB7	S27A1_HUMAN	SLC27A1	Long-chain fatty acid transport protein 1
1.54467	-0.36664	1.38476	0.385744	0.271336	-0.323944	-0.850919	-0.564502	-1.48051	+	Cluster -3	377	1.2874	0.0287081	sp|Q16795|NDUA9_HUMAN	Q16795	NDUA9_HUMAN	NDUFA9	NADH dehydrogenase [ubiquinone] 1 alpha subcomplex subunit 9, mitochondrial
1.64658	-0.503376	1.35141	0.433544	0.147082	-0.201601	-0.789239	-0.756235	-1.32817	+	Cluster -3	1532	1.22467	0.032001	sp|P35573|GDE_HUMAN	P35573	GDE_HUMAN	AGL	Glycogen debranching enzyme
1.3964	-0.217708	1.18257	0.371913	0.129432	0.437098	-1.31603	-0.463321	-1.52036	+	Cluster -3	244	1.67105	0.0157222	sp|Q6UX53|MET7B_HUMAN	Q6UX53	MET7B_HUMAN	METTL7B	Methyltransferase-like protein 7B
1.3549	-0.110174	1.24923	0.0438021	0.495173	0.451617	-1.15513	-0.94901	-1.38041	+	Cluster -3	183	2.13635	0.00828747	sp|P61225|RAP2B_HUMAN	P61225	RAP2B_HUMAN	RAP2B	Ras-related protein Rap-2b
1.34215	-0.472753	1.02122	0.221189	0.771926	0.475558	-1.31555	-0.673873	-1.36987	+	Cluster -3	769	1.60836	0.0171452	sp|Q5T3J3|LRIF1_HUMAN	Q5T3J3	LRIF1_HUMAN	LRIF1	Ligand-dependent nuclear receptor-interacting factor 1
1.32025	-0.232979	1.50219	0.0881037	-0.021466	0.52553	-0.623238	-1.26255	-1.29584	+	Cluster -3	545	1.63905	0.016621	sp|Q13153|PAK1_HUMAN	Q13153	PAK1_HUMAN	PAK1	Serine/threonine-protein kinase PAK 1
1.43468	-0.189478	1.40565	0.213282	-0.265982	0.569496	-0.991606	-1.35119	-0.824855	+	Cluster -3	525	1.66788	0.015863	sp|Q96I76|GPTC3_HUMAN	Q96I76	GPTC3_HUMAN	GPATCH3	G patch domain-containing protein 3
1.38371	-0.610127	1.41593	0.0857864	0.202749	0.599296	-0.912936	-0.832378	-1.33203	+	Cluster -3	704	1.28549	0.0288687	sp|Q96NY7|CLIC6_HUMAN	Q96NY7	CLIC6_HUMAN	CLIC6	Chloride intracellular channel protein 6
1.71053	-0.583375	1.34712	0.00220084	0.0438787	0.341258	-0.748844	-0.993145	-1.11962	+	Cluster -3	1649	1.20211	0.0333165	sp|Q9P2K8|E2AK4_HUMAN	Q9P2K8	E2AK4_HUMAN	EIF2AK4	eIF-2-alpha kinase GCN2
1.71019	-0.361167	1.19673	0.269117	-0.108794	0.397752	-0.955831	-0.916511	-1.23149	+	Cluster -3	437	1.50267	0.0199787	sp|O75616|ERAL1_HUMAN	O75616	ERAL1_HUMAN	ERAL1	GTPase Era, mitochondrial
1.35384	-0.358913	1.37114	0.265334	0.454915	0.283861	-1.11382	-1.21248	-1.04387	+	Cluster -3	925	1.7985	0.0128285	sp|P57737|CORO7_HUMAN	P57737	CORO7_HUMAN	CORO7	Coronin-7
1.18392	-0.2038	1.57072	0.353286	0.222248	0.240312	-0.897852	-1.27905	-1.18978	+	Cluster -3	647	1.92119	0.0107969	sp|P53667|LIMK1_HUMAN	P53667	LIMK1_HUMAN	LIMK1	LIM domain kinase 1
1.29561	-0.425275	1.1989	0.535326	0.46341	0.326149	-1.20669	-1.44511	-0.742324	+	Cluster -3	265	1.71339	0.0147765	sp|O00142|KITM_HUMAN	O00142	KITM_HUMAN	TK2	Thymidine kinase 2, mitochondrial
1.71298	0.143082	1.00895	-0.602807	0.69112	-0.210433	-0.264696	-1.26338	-1.21481	+	Cluster -3	298	1.39074	0.0241617	sp|Q9UH92|MLX_HUMAN	Q9UH92	MLX_HUMAN	MLX	Max-like protein X
1.85572	0.427534	0.701596	-0.485089	0.231281	0.160374	-0.249284	-1.40529	-1.23684	+	Cluster -3	71	1.6582	0.0160584	sp|Q6ZYL4|TF2H5_HUMAN	Q6ZYL4	TF2H5_HUMAN	GTF2H5	General transcription factor IIH subunit 5
1.83998	-0.236536	1.21368	-0.47187	0.316299	0.156278	-0.708727	-1.13183	-0.977265	+	Cluster -3	1055	1.41137	0.0232963	sp|Q9UHP3|UBP25_HUMAN	Q9UHP3	UBP25_HUMAN	USP25	Ubiquitin carboxyl-terminal hydrolase 25
1.39896	0.670187	0.800405	-0.728076	0.457113	0.41969	-0.670837	-1.81896	-0.528481	+	Cluster -3	666	1.67539	0.0156911	sp|Q8N8A6|DDX51_HUMAN	Q8N8A6	DDX51_HUMAN	DDX51	ATP-dependent RNA helicase DDX51
1.24145	0.287732	0.966797	-0.37716	0.391392	0.8155	-0.522213	-1.77479	-1.02871	+	Cluster -3	261	1.80157	0.0128097	sp|Q8N3J9|ZN664_HUMAN	Q8N3J9	ZN664_HUMAN	ZNF664	Zinc finger protein 664
1.50362	0.0847041	1.06967	-0.772756	0.528869	0.578242	-0.710886	-1.50723	-0.774229	+	Cluster -3	176	1.45285	0.0218368	sp|Q01658|NC2B_HUMAN	Q01658	NC2B_HUMAN	DR1	Protein Dr1
1.25381	0.260883	1.3541	-0.664206	0.351741	0.532804	-0.461402	-1.23597	-1.39176	+	Cluster -3	396	1.76795	0.0133738	sp|P13994|CC130_HUMAN	P13994	CC130_HUMAN	CCDC130	Coiled-coil domain-containing protein 130
1.43333	-0.365323	0.939308	-0.0491776	0.426272	0.594756	-0.0938651	-1.77479	-1.11052	+	Cluster -3	709	1.12114	0.0384096	sp|Q08945|SSRP1_HUMAN	Q08945	SSRP1_HUMAN	SSRP1	FACT complex subunit SSRP1
1.60953	1.046	0.534536	-1.24941	-0.667378	0.727687	-0.341406	-0.829729	-0.829834	+	Cluster -3	264	1.36692	0.0249853	sp|Q96BZ8|LENG1_HUMAN	Q96BZ8	LENG1_HUMAN	LENG1	Leukocyte receptor cluster member 1
1.75704	0.661692	0.744481	-0.759315	-0.629314	0.822151	-0.792159	-0.811698	-0.992881	+	Cluster -3	1183	1.61841	0.0169152	sp|Q99550|MPP9_HUMAN	Q99550	MPP9_HUMAN	MPHOSPH9	M-phase phosphoprotein 9
1.94218	0.234727	0.682692	-0.525102	-0.59297	0.725736	-0.290386	-0.865958	-1.31092	+	Cluster -3	577	1.19635	0.0335132	sp|Q9HCI7|MSL2_HUMAN	Q9HCI7	MSL2_HUMAN	MSL2	E3 ubiquitin-protein ligase MSL2
1.874	0.447957	0.757312	-0.496772	-0.713287	0.709385	-0.521779	-1.21235	-0.844461	+	Cluster -3	484	1.49506	0.0202963	sp|Q9UMX1|SUFU_HUMAN	Q9UMX1	SUFU_HUMAN	SUFU	Suppressor of fused homolog
2.0051	0.61505	0.497972	-0.520408	-0.359428	0.429636	-0.395186	-1.25856	-1.01417	+	Cluster -3	311	1.6134	0.0171058	sp|Q96CQ1|S2536_HUMAN	Q96CQ1	S2536_HUMAN	SLC25A36	Solute carrier family 25 member 36
1.56591	0.409621	1.0228	-0.165248	-0.329439	0.31735	0.019272	-1.24191	-1.59835	+	Cluster -3	331	1.60152	0.0173384	sp|P05412|JUN_HUMAN	P05412	JUN_HUMAN	JUN	Transcription factor AP-1
1.30907	0.178703	1.25103	0.0953588	-0.230848	0.317506	0.0789275	-1.39822	-1.60153	+	Cluster -3	1164	1.44205	0.0221774	sp|Q92574|TSC1_HUMAN	Q92574	TSC1_HUMAN	TSC1	Hamartin
1.72076	0.257384	0.523305	-0.0654662	0.0111956	0.396202	0.0975113	-1.15142	-1.78948	+	Cluster -3	1083	1.20185	0.033303	sp|Q9C0H5|RHG39_HUMAN	Q9C0H5	RHG39_HUMAN	ARHGAP39	Rho GTPase-activating protein 39
1.89929	-0.0646152	0.867253	-0.20792	-0.333888	0.300074	0.131009	-1.20257	-1.38864	+	Cluster -3	406	1.06612	0.0432659	sp|Q06587|RING1_HUMAN	Q06587	RING1_HUMAN	RING1	E3 ubiquitin-protein ligase RING1
1.59732	0.221001	0.905829	-0.509252	-0.50158	0.606087	0.262596	-0.904615	-1.67739	+	Cluster -3	253	1.01226	0.0486568	sp|P41247|PLPL4_HUMAN	P41247	PLPL4_HUMAN	PNPLA4	Patatin-like phospholipase domain-containing protein 4
1.86921	0.162215	0.87933	-0.84081	-0.0781965	0.236587	-0.188942	-0.378522	-1.66087	+	Cluster -3	518	1.12814	0.0379179	sp|Q9NP81|SYSM_HUMAN	Q9NP81	SYSM_HUMAN	SARS2	Serine--tRNA ligase, mitochondrial
1.8646	-0.156906	1.25186	-0.643001	-0.524404	0.349656	-0.477797	-0.327997	-1.33601	+	Cluster -3	1040	1.14259	0.0367029	sp|Q9NTJ4|MA2C1_HUMAN	Q9NTJ4	MA2C1_HUMAN	MAN2C1	Alpha-mannosidase 2C1
1.9633	0.174038	1.11271	-0.447279	-0.426469	-0.180387	-0.165167	-0.583319	-1.44742	+	Cluster -3	2863	1.51476	0.0195678	sp|P50851|LRBA_HUMAN	P50851	LRBA_HUMAN	LRBA	Lipopolysaccharide-responsive and beige-like anchor protein
1.83449	0.204519	1.28582	-0.556736	-0.436707	0.0574058	-0.287685	-0.780899	-1.32021	+	Cluster -3	226	1.72965	0.0143854	sp|P00846|ATP6_HUMAN	P00846	ATP6_HUMAN	MT-ATP6	ATP synthase subunit a
1.79995	0.189523	1.05132	0.21723	-0.472342	0.118242	-0.704097	-0.642021	-1.55781	+	Cluster -3	653	1.74219	0.0141493	sp|P35475|IDUA_HUMAN	P35475	IDUA_HUMAN	IDUA	Alpha-L-iduronidase
2.03237	0.247394	0.875204	-0.15479	-0.244406	0.150968	-0.738334	-0.943385	-1.22502	+	Cluster -3	327	1.91119	0.0108024	sp|Q8N0Y2|ZN444_HUMAN	Q8N0Y2	ZN444_HUMAN	ZNF444	Zinc finger protein 444
2.06611	0.109521	0.906598	-0.29049	-0.516541	0.296436	-0.566518	-0.750577	-1.25454	+	Cluster -3	175	1.49378	0.0203406	sp|O43181|NDUS4_HUMAN	O43181	NDUS4_HUMAN	NDUFS4	NADH dehydrogenase [ubiquinone] iron-sulfur protein 4, mitochondrial
1.93454	0.4628	1.09543	-0.23485	-0.8092	-0.373853	-0.135519	-1.18737	-0.751978	+	Cluster -3	380	1.92309	0.0107406	sp|Q96S82|UBL7_HUMAN	Q96S82	UBL7_HUMAN	UBL7	Ubiquitin-like protein 7
2.10645	0.400026	0.965383	-0.404614	-0.594818	-0.439262	-0.192138	-0.800522	-1.04051	+	Cluster -3	140	1.86331	0.0115544	sp|Q9UKR5|ERG28_HUMAN	Q9UKR5	ERG28_HUMAN	ERG28	Ergosterol biosynthetic protein 28 homolog
2.24133	0.436051	0.783804	-0.638361	-0.441467	-0.461397	-0.350311	-0.816616	-0.753038	+	Cluster -3	447	1.81522	0.0124779	sp|Q969R8|ITFG2_HUMAN	Q969R8	ITFG2_HUMAN	ITFG2	KICSTOR complex protein ITFG2
2.2247	0.028664	0.617943	-0.30858	-0.482464	0.138638	-0.0893274	-1.21528	-0.914296	+	Cluster -3	416	1.08873	0.0413421	sp|Q8N371|KDM8_HUMAN	Q8N371	KDM8_HUMAN	KDM8	Bifunctional peptidase and arginyl-hydroxylase JMJD5
2.21954	0.472945	0.47157	-0.544348	-0.634131	-0.0306049	-0.00968747	-1.10696	-0.838318	+	Cluster -3	215	1.32133	0.0271238	sp|Q8N983|RM43_HUMAN	Q8N983	RM43_HUMAN	MRPL43	39S ribosomal protein L43, mitochondrial
2.31441	0.312072	0.438723	-0.569176	-0.813699	-0.413621	0.0778751	-1.04997	-0.296613	+	Cluster -3	504	1.17128	0.0350306	sp|Q15750|TAB1_HUMAN	Q15750	TAB1_HUMAN	TAB1	TGF-beta-activated kinase 1 and MAP3K7-binding protein 1
2.044	-0.326111	0.9091	0.153499	-0.313913	0.100791	-0.350529	-1.40586	-0.810978	+	Cluster -3	161	1.07657	0.0424389	sp|O75947|ATP5H_HUMAN	O75947	ATP5H_HUMAN	ATP5PD	ATP synthase subunit d, mitochondrial
2.13449	-0.225835	0.720079	0.12774	-0.668199	0.407024	-0.499422	-1.04682	-0.949059	+	Cluster -3	381	1.03489	0.0463241	sp|Q9BUA3|SPNDC_HUMAN	Q9BUA3	SPNDC_HUMAN	SPINDOC	Spindlin interactor and repressor of chromatin-binding protein
2.28582	-0.282346	0.912653	-0.019812	-0.483266	-0.428563	-0.597221	-0.944489	-0.442773	+	Cluster -3	655	1.05369	0.0443607	sp|Q12778|FOXO1_HUMAN	Q12778	FOXO1_HUMAN	FOXO1	Forkhead box protein O1
1.93028	-0.444317	1.29503	0.0776448	-0.209956	-0.316869	-0.481919	-1.3159	-0.533989	+	Cluster -3	298	1.0614	0.0437024	sp|A4D161|F221A_HUMAN	A4D161	F221A_HUMAN	FAM221A	Protein FAM221A
0.137543	0.612408	-0.0410232	0.466804	0.681058	1.31545	-2.12046	-0.258725	-0.793052	+	Cluster -3	312	1.53886	0.0188306	sp|Q5HYI7|MTX3_HUMAN	Q5HYI7	MTX3_HUMAN	MTX3	Metaxin-3
0.549293	0.852342	0.311745	0.232164	-0.0327893	1.15248	-2.24513	-0.170772	-0.649328	+	Cluster -3	601	1.1615	0.035597	sp|Q96SZ6|CK5P1_HUMAN	Q96SZ6	CK5P1_HUMAN	CDK5RAP1	Mitochondrial tRNA methylthiotransferase CDK5RAP1
0.241404	0.672743	0.336157	0.81277	0.191515	0.722042	-1.93382	0.446617	-1.48943	+	Cluster -3	914	1.06518	0.0433773	sp|Q9Y2K6|UBP20_HUMAN	Q9Y2K6	UBP20_HUMAN	USP20	Ubiquitin carboxyl-terminal hydrolase 20
0.154978	0.404596	0.0177394	1.41974	0.10822	0.755379	-1.83636	0.2994	-1.32369	+	Cluster -3	463	1.10595	0.0396281	sp|Q9NQG6|MID51_HUMAN	Q9NQG6	MID51_HUMAN	MIEF1	Mitochondrial dynamics protein MID51
0.711359	0.736979	-0.969822	0.524095	0.791119	1.22467	-0.930469	-0.512733	-1.5752	+	Cluster -3	318	1.39772	0.0238545	sp|Q16585|SGCB_HUMAN	Q16585	SGCB_HUMAN	SGCB	Beta-sarcoglycan
0.936706	0.460175	-1.00314	0.729455	0.684044	1.17346	-0.76826	-0.611333	-1.60111	+	Cluster -3	442	1.38843	0.0242297	sp|Q8IUI8|CRLF3_HUMAN	Q8IUI8	CRLF3_HUMAN	CRLF3	Cytokine receptor-like factor 3
1.34564	0.394102	-1.01406	0.247986	0.767838	1.1396	-1.16468	-0.521794	-1.19463	+	Cluster -3	2174	1.07374	0.0426496	sp|Q9UHV7|MED13_HUMAN	Q9UHV7	MED13_HUMAN	MED13	Mediator of RNA polymerase II transcription subunit 13
0.536584	-0.0718679	-0.29331	0.862516	0.16737	1.87324	-1.06467	-0.699486	-1.31038	+	Cluster -3	846	1.78685	0.0130397	sp|Q9UQ84|EXO1_HUMAN	Q9UQ84	EXO1_HUMAN	EXO1	Exonuclease 1
0.128738	0.746455	-0.203442	0.437246	0.530946	1.58086	-1.2264	-0.319061	-1.67535	+	Cluster -3	783	1.66679	0.0158926	sp|Q8TCS8|PNPT1_HUMAN	Q8TCS8	PNPT1_HUMAN	PNPT1	Polyribonucleotide nucleotidyltransferase 1, mitochondrial
0.845679	0.829506	-0.293152	0.445288	-0.226199	1.54338	-1.07584	-0.494782	-1.57388	+	Cluster -3	597	1.26411	0.029727	sp|Q9NYH9|UTP6_HUMAN	Q9NYH9	UTP6_HUMAN	UTP6	U3 small nucleolar RNA-associated protein 6 homolog
1.09064	0.1558	-0.0607934	-0.142835	0.73109	1.30363	-1.97696	-0.466062	-0.63451	+	Cluster -3	1012	1.20147	0.0333379	sp|O43303|CP110_HUMAN	O43303	CP110_HUMAN	CCP110	Centriolar coiled-coil protein of 110 kDa
1.08363	-0.412521	0.00232644	0.551037	0.488827	1.12363	-2.12552	-0.156242	-0.55516	+	Cluster -3	396	1.03823	0.0459726	sp|Q99986|VRK1_HUMAN	Q99986	VRK1_HUMAN	VRK1	Serine/threonine-protein kinase VRK1
0.95059	0.484171	-0.883093	0.820046	0.389648	1.17049	-1.77046	-0.779229	-0.382167	+	Cluster -3	589	1.21646	0.032533	sp|Q9NSD9|SYFB_HUMAN	Q9NSD9	SYFB_HUMAN	FARSB	Phenylalanine--tRNA ligase beta subunit
1.43479	0.362022	-0.506785	0.361446	0.397005	0.998439	-1.88523	-0.721403	-0.440288	+	Cluster -3	136	1.14514	0.0365411	sp|Q86WX3|AROS_HUMAN	Q86WX3	AROS_HUMAN	RPS19BP1	Active regulator of SIRT1
0.942884	0.527883	-0.712768	0.630279	0.906738	0.888581	-1.78853	-0.42984	-0.965226	+	Cluster -3	1141	1.53177	0.0190251	sp|Q96AE7|TTC17_HUMAN	Q96AE7	TTC17_HUMAN	TTC17	Tetratricopeptide repeat protein 17
0.934823	0.264847	-0.764451	0.710995	0.969533	0.917484	-1.80267	-0.317342	-0.913218	+	Cluster -3	523	1.45429	0.021779	sp|Q8TD30|ALAT2_HUMAN	Q8TD30	ALAT2_HUMAN	GPT2	Alanine aminotransferase 2
1.14659	0.752358	-0.384986	0.181021	0.698931	0.954978	-1.82632	-0.614213	-0.908361	+	Cluster -3	753	1.58212	0.0176954	sp|Q9BVQ7|SPA5L_HUMAN	Q9BVQ7	SPA5L_HUMAN	SPATA5L1	Spermatogenesis-associated protein 5-like protein 1
1.19801	1.08399	-0.403186	0.368614	0.707117	0.508966	-1.62512	-0.893082	-0.945313	+	Cluster -3	588	1.81428	0.0125387	sp|O00541|PESC_HUMAN	O00541	PESC_HUMAN	PES1	Pescadillo homolog
0.867925	-0.675271	-0.235868	0.014822	0.69267	1.97234	-0.998202	-0.704395	-0.934015	+	Cluster -3	202	1.15835	0.0357304	sp|Q15834|CC85B_HUMAN	Q15834	CC85B_HUMAN	CCDC85B	Coiled-coil domain-containing protein 85B
1.1158	-0.68353	0.424767	-0.0637952	1.3084	0.978814	-1.07884	-0.636007	-1.36561	+	Cluster -3	277	1.30236	0.0280791	sp|Q9HA47|UCK1_HUMAN	Q9HA47	UCK1_HUMAN	UCK1	Uridine-cytidine kinase 1
1.24383	-0.667598	-0.0297753	0.238956	0.807913	1.33555	-0.905856	-0.443203	-1.57981	+	Cluster -3	526	1.21473	0.0326115	sp|Q7Z6J9|SEN54_HUMAN	Q7Z6J9	SEN54_HUMAN	TSEN54	tRNA-splicing endonuclease subunit Sen54
1.34631	0.338203	0.0216981	-0.775031	1.15535	0.906804	-0.743826	-1.46488	-0.784632	+	Cluster -3	507	1.08053	0.0420197	sp|Q02078|MEF2A_HUMAN	Q02078	MEF2A_HUMAN	MEF2A	Myocyte-specific enhancer factor 2A
1.62818	0.0687497	0.318606	-0.571782	0.472936	1.18001	-0.775023	-1.11599	-1.20569	+	Cluster -3	1274	1.25222	0.0303269	sp|Q5VU97|CAHD1_HUMAN	Q5VU97	CAHD1_HUMAN	CACHD1	VWFA and cache domain-containing protein 1
1.42194	0.00245575	-0.479486	-0.2862	1.05958	1.25285	-1.11628	-0.86586	-0.989001	+	Cluster -3	1094	1.11818	0.0385913	sp|Q6ZU80|CE128_HUMAN	Q6ZU80	CE128_HUMAN	CEP128	Centrosomal protein of 128 kDa
0.687414	-0.0872755	-0.163374	0.282005	1.88355	0.473935	-0.780491	-0.702446	-1.59332	+	Cluster -3	206	1.53664	0.018876	sp|Q96GV9|MACIR_HUMAN	Q96GV9	MACIR_HUMAN	MACIR	Macrophage immunometabolism regulator
0.935604	0.0568443	-0.168862	0.373977	1.92859	-0.160288	-1.00027	-0.611606	-1.35399	+	Cluster -3	641	1.149	0.0362997	sp|Q86T29|ZN605_HUMAN	Q86T29	ZN605_HUMAN	ZNF605	Zinc finger protein 605
0.53929	0.687788	0.310682	0.164266	1.45725	0.413043	-1.11522	-0.701261	-1.75583	+	Cluster -3	500	2.11483	0.00857658	sp|Q06330|SUH_HUMAN	Q06330	SUH_HUMAN	RBPJ	Recombining binding protein suppressor of hairless
0.356151	0.711043	-0.0116111	0.0464729	1.7436	0.523348	-0.731676	-1.18055	-1.45678	+	Cluster -3	1863	1.7669	0.0134023	sp|P38398|BRCA1_HUMAN	P38398	BRCA1_HUMAN	BRCA1	Breast cancer type 1 susceptibility protein
0.30222	0.705329	0.414577	0.459245	1.68892	-0.137331	-0.811162	-1.4872	-1.13461	+	Cluster -3	477	1.77425	0.0131831	sp|Q96I59|SYNM_HUMAN	Q96I59	SYNM_HUMAN	NARS2	Probable asparagine--tRNA ligase, mitochondrial
0.989397	0.223783	-0.589972	-0.17459	1.80213	0.561495	-1.44898	-0.701041	-0.662222	+	Cluster -3	475	1.02703	0.0469361	sp|Q9UJT0|TBE_HUMAN	Q9UJT0	TBE_HUMAN	TUBE1	Tubulin epsilon chain
1.34159	0.259997	0.35855	-0.151779	1.32407	0.0120427	-0.260051	-1.44984	-1.43457	+	Cluster -3	353	1.29722	0.0283318	sp|Q9UHY8|FEZ2_HUMAN	Q9UHY8	FEZ2_HUMAN	FEZ2	Fasciculation and elongation protein zeta-2
1.09189	1.10021	-0.160074	0.150431	1.08935	-0.308471	-0.0574242	-1.30839	-1.59752	+	Cluster -3	125	1.112	0.0392063	sp|Q9NRP4|SDHF3_HUMAN	Q9NRP4	SDHF3_HUMAN	SDHAF3	Succinate dehydrogenase assembly factor 3, mitochondrial
1.31675	0.702219	-0.419459	1.0026	0.432172	-0.0554461	-0.655158	-1.95968	-0.363999	+	Cluster -3	606	1.05668	0.0440684	sp|Q8N9R8|SCAI_HUMAN	Q8N9R8	SCAI_HUMAN	SCAI	Protein SCAI
0.931436	0.914588	0.00946002	0.738911	0.729996	-0.422619	-1.19252	-1.89277	0.18352	+	Cluster -3	463	1.01147	0.0487058	sp|Q9UM63|PLAL1_HUMAN	Q9UM63	PLAL1_HUMAN	PLAGL1	Zinc finger protein PLAGL1
1.00284	0.181827	-0.166363	0.675671	0.604213	0.653156	-0.27048	-2.34509	-0.335775	+	Cluster -3	327	1.07509	0.0425947	sp|Q5VY09|IER5_HUMAN	Q5VY09	IER5_HUMAN	IER5	Immediate early response gene 5 protein
1.431	0.478558	0.373213	-0.180875	0.474915	0.673422	-1.0245	-1.93312	-0.292604	+	Cluster -3	229	1.55263	0.0184334	sp|Q9H7E9|CH033_HUMAN	Q9H7E9	CH033_HUMAN	C8orf33	UPF0488 protein C8orf33
1.44134	-0.0526223	0.249117	0.0957522	0.847216	0.723234	-0.883313	-1.88025	-0.54048	+	Cluster -3	416	1.49399	0.0203283	sp|Q9P289|STK26_HUMAN	Q9P289	STK26_HUMAN	STK26	Serine/threonine-protein kinase 26
1.54067	0.308982	0.291134	0.210795	0.53074	0.30206	-0.419061	-2.10017	-0.665143	+	Cluster -3	505	1.40115	0.0236603	sp|P15336|ATF2_HUMAN	P15336	ATF2_HUMAN	ATF2	Cyclic AMP-dependent transcription factor ATF-2
1.57415	0.438587	0.248737	0.341159	0.232021	0.257297	-0.606323	-2.13011	-0.355523	+	Cluster -3	426	1.33172	0.0265191	sp|Q9UHH9|IP6K2_HUMAN	Q9UHH9	IP6K2_HUMAN	IP6K2	Inositol hexakisphosphate kinase 2
1.35398	0.262215	0.589874	0.134604	0.325751	0.131078	-0.0291872	-2.32649	-0.441827	+	Cluster -3	443	1.02151	0.0474744	sp|Q86X53|ERIC1_HUMAN	Q86X53	ERIC1_HUMAN	ERICH1	Glutamate-rich protein 1
1.27991	-0.217852	0.517864	0.357987	0.752114	0.594932	-0.413113	-2.02923	-0.842611	+	Cluster -3	345	1.46338	0.0214508	sp|Q9GZM8|NDEL1_HUMAN	Q9GZM8	NDEL1_HUMAN	NDEL1	Nuclear distribution protein nudE-like 1
1.15524	0.105027	0.444209	0.496353	0.322658	0.881228	-0.660211	-2.12325	-0.621256	+	Cluster -3	385	1.67967	0.0156049	sp|O43837|IDH3B_HUMAN	O43837	IDH3B_HUMAN	IDH3B	Isocitrate dehydrogenase [NAD] subunit beta, mitochondrial
1.20037	-0.475471	-0.850426	0.891029	0.87977	0.946877	-0.105144	-1.38779	-1.09922	+	Cluster -3	2799	1.15647	0.0358117	sp|O95071|UBR5_HUMAN	O95071	UBR5_HUMAN	UBR5	E3 ubiquitin-protein ligase UBR5
1.37406	-0.0197204	-0.606397	0.309992	0.916455	1.00871	-0.453622	-1.70375	-0.825734	+	Cluster -3	262	1.20121	0.0333469	sp|Q92871|PMM1_HUMAN	Q92871	PMM1_HUMAN	PMM1	Phosphomannomutase 1
1.31086	-0.245776	-0.400476	0.780853	1.06826	0.649836	-0.937208	-1.62842	-0.597934	+	Cluster -3	394	1.5497	0.0185376	sp|P61160|ARP2_HUMAN	P61160	ARP2_HUMAN	ACTR2	Actin-related protein 2
1.29221	-0.269011	-0.335891	1.10404	1.24541	-0.0667249	-0.633893	-1.51446	-0.821694	+	Cluster -3	305	1.20807	0.0329416	sp|Q96A73|P33MX_HUMAN	Q96A73	P33MX_HUMAN	KIAA1191	Putative monooxygenase p33MONOX
1.52017	-0.539361	-0.282793	1.24482	0.473977	0.430773	-0.676391	-1.60708	-0.564114	+	Cluster -3	521	1.04236	0.0455152	sp|Q96T60|PNKP_HUMAN	Q96T60	PNKP_HUMAN	PNKP	Bifunctional polynucleotide phosphatase/kinase
0.9333	0.0632324	-0.205304	1.05417	0.490566	1.01675	-0.322078	-1.53721	-1.49343	+	Cluster -3	619	1.9026	0.0109591	sp|Q96K58|ZN668_HUMAN	Q96K58	ZN668_HUMAN	ZNF668	Zinc finger protein 668
0.762031	0.0798966	-0.0621202	1.12066	1.01498	0.491327	-0.321762	-1.64106	-1.44395	+	Cluster -3	160	2.07408	0.00894803	sp|Q99547|MPH6_HUMAN	Q99547	MPH6_HUMAN	MPHOSPH6	M-phase phosphoprotein 6
1.19248	0.630178	-0.221999	0.270524	0.561334	0.818688	-0.0761062	-1.70295	-1.47215	+	Cluster -3	205	1.40824	0.0234258	sp|Q14919|NC2A_HUMAN	Q14919	NC2A_HUMAN	DRAP1	Dr1-associated corepressor
1.2937	0.593899	0.19527	0.43323	0.754274	0.241258	-0.353202	-1.51555	-1.64288	+	Cluster -3	460	1.97056	0.0101356	sp|P55055|NR1H2_HUMAN	P55055	NR1H2_HUMAN	NR1H2	Oxysterols receptor LXR-beta
1.2761	0.108085	0.276279	0.568442	0.805494	0.268162	-0.143164	-1.91755	-1.24186	+	Cluster -3	979	1.49145	0.0203892	sp|Q6N043|Z280D_HUMAN	Q6N043	Z280D_HUMAN	ZNF280D	Zinc finger protein 280D
1.57531	0.0607639	0.505156	0.523771	0.587815	0.0565004	-0.34529	-1.73156	-1.23246	+	Cluster -3	154	1.58701	0.0176222	sp|O43257|ZNHI1_HUMAN	O43257	ZNHI1_HUMAN	ZNHIT1	Zinc finger HIT domain-containing protein 1
1.39904	0.0514206	-0.122256	0.914251	0.422285	0.345539	0.101082	-1.69891	-1.41245	+	Cluster -3	150	1.09648	0.0405684	sp|O43169|CYB5B_HUMAN	O43169	CYB5B_HUMAN	CYB5B	Cytochrome b5 type B
0.525253	0.824634	-0.785997	1.31107	1.09937	-0.124067	-0.487377	-0.704872	-1.65801	+	Cluster -3	192	1.09826	0.0404043	sp|Q9Y3B7|RM11_HUMAN	Q9Y3B7	RM11_HUMAN	MRPL11	39S ribosomal protein L11, mitochondrial
0.681657	0.471593	-0.456459	0.958313	1.20621	-0.0310529	-0.650732	-0.106984	-2.07254	+	Cluster -3	380	1.0221	0.0475002	sp|P18615|NELFE_HUMAN	P18615	NELFE_HUMAN	NELFE	Negative elongation factor E
1.18317	0.0111153	0.0472333	1.13407	0.722783	0.118979	-0.873255	-0.376724	-1.96737	+	Cluster -3	500	1.39866	0.0237782	sp|Q86XR8|CEP57_HUMAN	Q86XR8	CEP57_HUMAN	CEP57	Centrosomal protein of 57 kDa
0.853354	0.433049	-0.135005	1.19742	0.533419	0.158787	-1.0094	0.0424402	-2.07407	+	Cluster -3	894	1.15957	0.0357243	sp|Q2TBE0|C19L2_HUMAN	Q2TBE0	C19L2_HUMAN	CWF19L2	CWF19-like protein 2
0.896363	0.564792	0.269404	0.988971	0.607602	-0.124012	-0.499459	-0.474908	-2.22875	+	Cluster -3	235	1.34067	0.025987	sp|Q9NVX0|HAUS2_HUMAN	Q9NVX0	HAUS2_HUMAN	HAUS2	HAUS augmin-like complex subunit 2
1.01985	0.874034	-0.182156	0.967459	0.564836	-0.177203	-0.767535	-0.243017	-2.05626	+	Cluster -3	105	1.16319	0.0355018	sp|P10599|THIO_HUMAN	P10599	THIO_HUMAN	TXN	Thioredoxin
1.11778	0.342339	0.627318	1.2746	0.340626	-0.0487677	-1.17244	-1.09349	-1.38798	+	Cluster -3	961	2.3884	0.00595945	sp|Q9Y5B0|CTDP1_HUMAN	Q9Y5B0	CTDP1_HUMAN	CTDP1	RNA polymerase II subunit A C-terminal domain phosphatase
1.05717	0.170557	0.529104	1.69517	-0.176139	-0.0968783	-1.00346	-0.709622	-1.4659	+	Cluster -3	747	1.30939	0.0276563	sp|Q71SY5|MED25_HUMAN	Q71SY5	MED25_HUMAN	MED25	Mediator of RNA polymerase II transcription subunit 25
0.907751	0.920344	0.350408	1.3695	-0.0597864	-0.0417615	-0.997508	-0.817259	-1.63168	+	Cluster -3	651	1.85747	0.0116673	sp|P08236|BGLR_HUMAN	P08236	BGLR_HUMAN	GUSB	Beta-glucuronidase
1.07574	0.720893	-0.413617	1.39037	0.511549	0.0434242	-0.721692	-1.16709	-1.43958	+	Cluster -3	495	1.56413	0.0181708	sp|Q8NEH6|MNS1_HUMAN	Q8NEH6	MNS1_HUMAN	MNS1	Meiosis-specific nuclear structural protein 1
0.90377	0.321061	-0.0234946	1.47664	0.782443	-0.105552	-0.538293	-1.30973	-1.50685	+	Cluster -3	198	1.66944	0.0157847	sp|Q8TBF2|PXL2B_HUMAN	Q8TBF2	PXL2B_HUMAN	PRXL2B	Prostamide/prostaglandin F synthase
0.842532	0.556505	0.179583	1.47402	0.605546	-0.203676	-1.32634	-0.649629	-1.47854	+	Cluster -3	711	1.79422	0.0129008	sp|Q92945|FUBP2_HUMAN	Q92945	FUBP2_HUMAN	KHSRP	Far upstream element-binding protein 2
0.786414	0.756742	-0.149724	1.54928	0.721907	-0.493184	-1.03014	-0.704554	-1.43674	+	Cluster -3	309	1.30142	0.0281317	sp|P51948|MAT1_HUMAN	P51948	MAT1_HUMAN	MNAT1	CDK-activating kinase assembly factor MAT1
1.05869	0.595209	-0.492279	1.63465	-0.0147211	0.127835	-0.615683	-0.606314	-1.68738	+	Cluster -3	802	1.00097	0.0499073	sp|O75582|KS6A5_HUMAN	O75582	KS6A5_HUMAN	RPS6KA5	Ribosomal protein S6 kinase alpha-5
1.06747	0.121191	-0.402384	1.46137	0.712974	0.333483	-1.28583	-0.644387	-1.36389	+	Cluster -3	81	1.75477	0.0138378	sp|Q9P1F3|ABRAL_HUMAN	Q9P1F3	ABRAL_HUMAN	ABRACL	Costars family protein ABRACL
1.11621	0.499914	-0.431966	1.59401	0.242018	0.165757	-1.18233	-0.623966	-1.37964	+	Cluster -3	556	1.36154	0.0251163	sp|P07686|HEXB_HUMAN	P07686	HEXB_HUMAN	HEXB	Beta-hexosaminidase subunit beta
0.595571	1.20652	-1.0427	1.09931	0.940019	0.156736	-0.763587	-1.08064	-1.11123	+	Cluster -3	607	1.15823	0.0357564	sp|P52306|GDS1_HUMAN	P52306	GDS1_HUMAN	RAP1GDS1	Rap1 GTPase-GDP dissociation stimulator 1
0.136401	1.18963	-0.434924	0.97263	1.02837	0.46844	-0.776557	-0.966067	-1.61793	+	Cluster -3	196	1.84711	0.0117727	sp|P30085|KCY_HUMAN	P30085	KCY_HUMAN	CMPK1	UMP-CMP kinase
0.127926	1.2586	-0.866937	1.16782	0.899116	0.486775	-0.844744	-0.969351	-1.2592	+	Cluster -3	783	1.47047	0.020973	sp|Q9NR30|DDX21_HUMAN	Q9NR30	DDX21_HUMAN	DDX21	Nucleolar RNA helicase 2
0.242948	1.21566	-0.882417	1.08381	0.731199	0.536662	-0.754587	-0.471748	-1.70153	+	Cluster -3	844	1.19855	0.0334961	sp|Q7Z3G6|PRIC2_HUMAN	Q7Z3G6	PRIC2_HUMAN	PRICKLE2	Prickle-like protein 2
0.283447	1.07341	-0.741605	1.08577	0.553479	0.805568	-0.824062	-0.445554	-1.79045	+	Cluster -3	307	1.38649	0.0242754	sp|Q8TAV0|FA76A_HUMAN	Q8TAV0	FA76A_HUMAN	FAM76A	Protein FAM76A
0.509716	0.840858	-0.611294	1.22069	0.752558	0.43373	-1.08002	-0.286854	-1.77938	+	Cluster -3	533	1.47088	0.0209875	sp|P15848|ARSB_HUMAN	P15848	ARSB_HUMAN	ARSB	Arylsulfatase B
0.908957	1.40289	-0.823407	0.67808	0.260233	0.502428	-1.18576	-0.230641	-1.51279	+	Cluster -3	851	1.0013	0.0499024	sp|Q9H501|ESF1_HUMAN	Q9H501	ESF1_HUMAN	ESF1	ESF1 homolog
0.343528	0.691209	-0.0640446	1.58984	0.558266	0.20582	-1.00449	-0.52052	-1.79961	+	Cluster -3	338	1.70918	0.0148782	sp|Q9Y5Z9|UBIA1_HUMAN	Q9Y5Z9	UBIA1_HUMAN	UBIAD1	UbiA prenyltransferase domain-containing protein 1
0.169082	0.980721	0.0807003	1.17662	0.557462	0.632077	-1.28689	-0.614152	-1.69561	+	Cluster -3	480	2.35044	0.00607143	sp|Q9UQ03|COR2B_HUMAN	Q9UQ03	COR2B_HUMAN	CORO2B	Coronin-2B
0.240481	1.00855	0.016186	1.31762	0.794251	0.167997	-1.53112	-0.726656	-1.28732	+	Cluster -3	130	2.14284	0.0081979	sp|Q9Y2R5|RT17_HUMAN	Q9Y2R5	RT17_HUMAN	MRPS17	28S ribosomal protein S17, mitochondrial
0.452698	1.00449	0.172247	1.2334	0.659974	0.245009	-1.21812	-1.22361	-1.32608	+	Cluster -3	804	2.90787	0.00345879	sp|Q2NL82|TSR1_HUMAN	Q2NL82	TSR1_HUMAN	TSR1	Pre-rRNA-processing protein TSR1 homolog
1.12109	0.173883	-0.235188	0.942911	0.647358	0.654465	-1.43097	-0.188986	-1.68456	+	Cluster -3	953	1.62065	0.0168604	sp|Q14151|SAFB2_HUMAN	Q14151	SAFB2_HUMAN	SAFB2	Scaffold attachment factor B2
1.17926	0.41512	-0.146684	0.781	0.962987	0.342801	-1.10929	-0.66974	-1.75545	+	Cluster -3	392	2.02897	0.00944426	sp|Q9Y383|LC7L2_HUMAN	Q9Y383	LC7L2_HUMAN	LUC7L2	Putative RNA-binding protein Luc7-like 2
0.718303	0.548061	0.0764372	0.842892	0.971488	0.496889	-1.31323	-0.533109	-1.80773	+	Cluster -3	941	2.50743	0.00485122	sp|O94906|PRP6_HUMAN	O94906	PRP6_HUMAN	PRPF6	Pre-mRNA-processing factor 6
0.652786	1.1924	-0.179081	0.731241	0.839398	0.449454	-1.2332	-0.953277	-1.49972	+	Cluster -3	1234	2.48801	0.00497258	sp|Q01970|PLCB3_HUMAN	Q01970	PLCB3_HUMAN	PLCB3	1-phosphatidylinositol 4,5-bisphosphate phosphodiesterase beta-3
0.718366	0.971038	-0.290421	1.15037	0.550409	0.484781	-1.24013	-0.77895	-1.56547	+	Cluster -3	275	2.2052	0.00732454	sp|Q9BQ83|SLX1_HUMAN	Q9BQ83	SLX1_HUMAN	SLX1A	Structure-specific endonuclease subunit SLX1
0.755239	0.803247	-0.124557	0.932486	0.467848	0.782701	-1.60856	-0.522771	-1.48563	+	Cluster -3	671	2.30363	0.00645542	sp|Q96C24|SYTL4_HUMAN	Q96C24	SYTL4_HUMAN	SYTL4	Synaptotagmin-like protein 4
0.788112	0.923572	-0.865148	0.851328	0.900798	0.588517	-1.39079	-0.481625	-1.31476	+	Cluster -3	372	1.49022	0.0204285	sp|P09651|ROA1_HUMAN	P09651	ROA1_HUMAN	HNRNPA1	Heterogeneous nuclear ribonucleoprotein A1
0.760567	0.808592	-0.601839	1.29599	0.718609	0.397655	-1.45418	-0.758775	-1.16662	+	Cluster -3	217	1.84502	0.0118349	sp|Q9P2W1|HOP2_HUMAN	Q9P2W1	HOP2_HUMAN	PSMC3IP	Homologous-pairing protein 2 homolog
1.15354	0.573044	-0.394288	0.986093	0.680275	0.427112	-1.64098	-0.516665	-1.26813	+	Cluster -3	306	1.78329	0.0130592	sp|Q99848|EBP2_HUMAN	Q99848	EBP2_HUMAN	EBNA1BP2	Probable rRNA-processing protein EBP2
1.28266	0.66949	-0.896624	0.956642	0.523535	0.508946	-1.29784	-0.402066	-1.34474	+	Cluster -3	1123	1.18578	0.0342635	sp|P78332|RBM6_HUMAN	P78332	RBM6_HUMAN	RBM6	RNA-binding protein 6
0.916969	0.374263	-0.732953	1.35534	0.761245	0.0947581	-1.50912	0.0713755	-1.33188	+	Cluster -3	1337	1.00145	0.0499154	sp|Q29RF7|PDS5A_HUMAN	Q29RF7	PDS5A_HUMAN	PDS5A	Sister chromatid cohesion protein PDS5 homolog A
0.820162	0.691452	-0.204219	0.771473	1.38285	0.0662324	-1.239	-0.879015	-1.40994	+	Cluster -3	178	2.06647	0.00905716	sp|Q9Y3C1|NOP16_HUMAN	Q9Y3C1	NOP16_HUMAN	NOP16	Nucleolar protein 16
0.536037	0.729148	0.0428647	0.661157	1.70348	-0.35297	-1.0705	-0.982892	-1.26632	+	Cluster -3	418	1.56471	0.0181483	sp|P61158|ARP3_HUMAN	P61158	ARP3_HUMAN	ACTR3	Actin-related protein 3
0.93073	0.702444	-0.459789	0.844152	1.4907	-0.377873	-0.834412	-1.04945	-1.2465	+	Cluster -3	93	1.27874	0.0292103	sp|Q9H299|SH3L3_HUMAN	Q9H299	SH3L3_HUMAN	SH3BGRL3	SH3 domain-binding glutamic acid-rich-like protein 3
0.977083	0.433047	-0.439222	0.762311	1.7053	-0.495103	-0.937577	-0.861825	-1.14402	+	Cluster -3	605	1.07671	0.0424481	sp|Q9UIS9|MBD1_HUMAN	Q9UIS9	MBD1_HUMAN	MBD1	Methyl-CpG-binding domain protein 1
0.559442	0.109241	-0.218306	1.41097	1.49746	-0.484204	-0.444865	-1.14406	-1.28568	+	Cluster -3	443	1.18612	0.0342517	sp|Q7L5Y1|ENOF1_HUMAN	Q7L5Y1	ENOF1_HUMAN	ENOSF1	Mitochondrial enolase superfamily member 1
0.519834	0.30237	-0.157155	1.24819	1.62993	-0.555069	-1.1439	-1.12441	-0.71979	+	Cluster -3	246	1.24469	0.0307091	sp|P31946|1433B_HUMAN	P31946	1433B_HUMAN	YWHAB	14-3-3 protein beta/alpha
1.42429	0.0581875	-0.385085	1.32075	0.699532	0.138832	-1.22937	-0.994176	-1.03295	+	Cluster -3	920	1.51039	0.0196978	sp|Q9NYF8|BCLF1_HUMAN	Q9NYF8	BCLF1_HUMAN	BCLAF1	Bcl-2-associated transcription factor 1
1.34276	0.213297	-0.407919	1.35799	0.868722	-0.306258	-1.24041	-1.11749	-0.710695	+	Cluster -3	188	1.1969	0.033523	sp|Q7Z6I8|CE024_HUMAN	Q7Z6I8	CE024_HUMAN	C5orf24	UPF0461 protein C5orf24
1.01548	0.922343	-0.463138	1.16208	0.783622	0.0118988	-1.20511	-1.17067	-1.05651	+	Cluster -3	376	1.76083	0.0135496	sp|Q9HB07|MYG1_HUMAN	Q9HB07	MYG1_HUMAN	MYG1	MYG1 exonuclease
1.00988	0.707813	-0.541514	1.02274	1.29894	-0.364536	-1.02108	-1.20841	-0.903832	+	Cluster -3	147	1.28248	0.02906	sp|Q9NRF9|DPOE3_HUMAN	Q9NRF9	DPOE3_HUMAN	POLE3	DNA polymerase epsilon subunit 3
1.10884	0.60403	-0.679055	1.08473	1.16609	-0.1009	-1.15324	-0.958204	-1.07229	+	Cluster -3	710	1.4035	0.0235963	sp|P19338|NUCL_HUMAN	P19338	NUCL_HUMAN	NCL	Nucleolin
1.81455	-0.11745	-0.0104439	0.377825	-0.235117	1.10801	-0.960956	-1.43049	-0.545928	+	Cluster -3	307	1.02088	0.0474997	sp|O43808|PM34_HUMAN	O43808	PM34_HUMAN	SLC25A17	Peroxisomal membrane protein PMP34
1.77315	-0.317325	0.130989	-0.050758	0.278287	1.19604	-1.26324	-1.10329	-0.643839	+	Cluster -3	236	1.0904	0.0412274	sp|Q9HD15|SRA1_HUMAN	Q9HD15	SRA1_HUMAN	SRA1	Steroid receptor RNA activator 1
1.33869	-0.241071	0.479256	0.571206	-0.209523	1.27801	-1.48874	-1.18608	-0.541757	+	Cluster -3	756	1.35567	0.0252957	sp|Q9NRF2|SH2B1_HUMAN	Q9NRF2	SH2B1_HUMAN	SH2B1	SH2B adapter protein 1
1.60616	-0.0359591	-0.637249	0.74929	0.0687106	1.19503	-0.986563	-1.23033	-0.729094	+	Cluster -3	1623	1.08973	0.041239	sp|Q9BXT8|RNF17_HUMAN	Q9BXT8	RNF17_HUMAN	RNF17	RING finger protein 17
0.987985	-0.387336	-0.339851	1.60032	0.104875	1.03523	-1.07027	-1.19445	-0.736507	+	Cluster -3	698	1.53035	0.0190463	sp|Q7Z5H3|RHG22_HUMAN	Q7Z5H3	RHG22_HUMAN	ARHGAP22	Rho GTPase-activating protein 22
1.19302	-0.0864806	-0.0391325	1.41388	-0.257125	0.795907	-0.898426	-1.6977	-0.423942	+	Cluster -3	157	1.15018	0.0361985	sp|P11441|UBL4A_HUMAN	P11441	UBL4A_HUMAN	UBL4A	Ubiquitin-like protein 4A
1.51441	-0.249349	0.323489	1.22766	-0.34294	0.63749	-1.10324	-1.3755	-0.632023	+	Cluster -3	756	1.20986	0.0328289	sp|O14920|IKKB_HUMAN	O14920	IKKB_HUMAN	IKBKB	Inhibitor of nuclear factor kappa-B kinase subunit beta
0.865411	0.026363	0.430423	0.423843	0.865764	1.02924	-1.8757	-0.889765	-0.87558	+	Cluster -3	540	2.4654	0.00506173	sp|Q9NZI7|UBIP1_HUMAN	Q9NZI7	UBIP1_HUMAN	UBP1	Upstream-binding protein 1
1.29241	-0.0528798	0.320607	0.14587	1.08239	0.805068	-1.40726	-1.17359	-1.01262	+	Cluster -3	5596	2.17565	0.00784349	sp|Q9NU22|MDN1_HUMAN	Q9NU22	MDN1_HUMAN	MDN1	Midasin
1.07073	-0.176858	0.285721	0.459697	1.04356	0.943825	-1.53194	-0.981453	-1.11328	+	Cluster -3	603	2.52055	0.00462154	sp|Q68CZ6|HAUS3_HUMAN	Q68CZ6	HAUS3_HUMAN	HAUS3	HAUS augmin-like complex subunit 3
0.600656	-0.294178	0.707501	-0.217951	1.30626	1.22623	-1.36676	-0.946492	-1.01527	+	Cluster -3	715	1.69476	0.0152057	sp|Q9C0B5|ZDHC5_HUMAN	Q9C0B5	ZDHC5_HUMAN	ZDHHC5	Palmitoyltransferase ZDHHC5
1.1126	0.074454	0.683734	-0.243111	1.12724	0.77543	-1.53585	-0.925883	-1.06861	+	Cluster -3	692	1.97207	0.0101462	sp|Q96SD1|DCR1C_HUMAN	Q96SD1	DCR1C_HUMAN	DCLRE1C	Protein artemis
0.704779	0.101174	0.330841	0.462931	1.11407	0.657481	-2.16345	-0.811187	-0.396646	+	Cluster -3	406	1.73247	0.0143067	sp|Q9H4K7|MTG2_HUMAN	Q9H4K7	MTG2_HUMAN	MTG2	Mitochondrial ribosome-associated GTPase 2
0.674654	-0.366035	0.947455	1.06667	0.452773	0.820577	-1.54152	-1.09841	-0.956163	+	Cluster -3	1157	2.32969	0.00624073	sp|Q8IY37|DHX37_HUMAN	Q8IY37	DHX37_HUMAN	DHX37	Probable ATP-dependent RNA helicase DHX37
1.34487	-0.381579	0.868069	0.845201	0.397032	0.435219	-1.45291	-0.971101	-1.0848	+	Cluster -3	698	1.91469	0.0107702	sp|Q8NC60|NOA1_HUMAN	Q8NC60	NOA1_HUMAN	NOA1	Nitric oxide-associated protein 1
1.094	-0.0458403	0.941715	0.736625	0.587741	0.334752	-1.77061	-0.852837	-1.02555	+	Cluster -3	386	2.34341	0.00610154	sp|Q86VN1|VPS36_HUMAN	Q86VN1	VPS36_HUMAN	VPS36	Vacuolar protein-sorting-associated protein 36
1.0459	-0.265621	0.545065	1.12991	0.690835	0.40868	-1.56279	-0.686848	-1.30514	+	Cluster -3	1232	2.14201	0.00818777	sp|Q9HCE9|ANO8_HUMAN	Q9HCE9	ANO8_HUMAN	ANO8	Anoctamin-8
1.26012	0.58145	0.77313	0.718625	0.0819696	0.180138	-1.83426	-0.932117	-0.829054	+	Cluster -3	618	2.59525	0.00451109	sp|Q8IXI2|MIRO1_HUMAN	Q8IXI2	MIRO1_HUMAN	RHOT1	Mitochondrial Rho GTPase 1
1.13393	0.337333	0.691797	0.993019	0.264376	0.313975	-1.70537	-1.02955	-0.999513	+	Cluster -3	214	2.75074	0.00409363	sp|Q86Y79|PTH_HUMAN	Q86Y79	PTH_HUMAN	PTRH1	Probable peptidyl-tRNA hydrolase
1.05309	0.350691	0.180694	1.21043	0.690718	0.206973	-1.5893	-0.972517	-1.13077	+	Cluster -3	1626	2.54234	0.00448296	sp|Q02880|TOP2B_HUMAN	Q02880	TOP2B_HUMAN	TOP2B	DNA topoisomerase 2-beta
1.27476	-0.0294029	0.247081	1.27304	0.622922	0.00954895	-1.66404	-0.740359	-0.993558	+	Cluster -3	339	1.68288	0.0154755	sp|Q6IEG0|SNR48_HUMAN	Q6IEG0	SNR48_HUMAN	SNRNP48	U11/U12 small nuclear ribonucleoprotein 48 kDa protein
1.07533	0.0686824	0.37204	1.19223	0.321847	0.480235	-1.91714	-0.784555	-0.808677	+	Cluster -3	224	1.94307	0.010624	sp|P17026|ZNF22_HUMAN	P17026	ZNF22_HUMAN	ZNF22	Zinc finger protein 22
1.21252	-0.0784026	0.135648	1.09167	0.9045	0.217531	-1.54675	-1.26853	-0.668193	+	Cluster -3	1063	1.95492	0.0104235	sp|O00159|MYO1C_HUMAN	O00159	MYO1C_HUMAN	MYO1C	Unconventional myosin-Ic
0.979207	0.163236	0.173824	1.0759	0.849584	0.43887	-1.67114	-1.22902	-0.780463	+	Cluster -3	349	2.65389	0.0043686	sp|Q9H9Y2|RPF1_HUMAN	Q9H9Y2	RPF1_HUMAN	RPF1	Ribosome production factor 1
1.13348	0.0291224	0.454133	0.733696	0.777882	0.681649	-1.41877	-1.31453	-1.07665	+	Cluster -3	421	3.19893	0.00308772	sp|Q9NWX5|ASB6_HUMAN	Q9NWX5	ASB6_HUMAN	ASB6	Ankyrin repeat and SOCS box protein 6
1.15431	-0.189236	0.441915	1.07606	0.620306	0.535946	-1.24451	-1.5058	-0.888994	+	Cluster -3	357	2.40381	0.00574815	sp|Q00796|DHSO_HUMAN	Q00796	DHSO_HUMAN	SORD	Sorbitol dehydrogenase
0.881684	0.125486	0.371288	0.924022	0.559685	0.893728	-1.55675	-1.46125	-0.737889	+	Cluster -3	347	3.03248	0.00295714	sp|P17535|JUND_HUMAN	P17535	JUND_HUMAN	JUND	Transcription factor jun-D
0.602948	0.268777	1.0104	1.28331	0.255802	0.309278	-1.48684	-1.18349	-1.06019	+	Cluster -3	494	2.65637	0.00430629	sp|Q14CB8|RHG19_HUMAN	Q14CB8	RHG19_HUMAN	ARHGAP19	Rho GTPase-activating protein 19
0.535135	-0.0977839	1.15657	1.00964	0.602648	0.273043	-1.53419	-1.5487	-0.396352	+	Cluster -3	1214	1.85039	0.0116678	sp|Q8TD43|TRPM4_HUMAN	Q8TD43	TRPM4_HUMAN	TRPM4	Transient receptor potential cation channel subfamily M member 4
0.426556	0.630937	0.823231	0.725545	0.517372	0.796163	-1.47751	-1.49397	-0.948328	+	Cluster -3	772	4.22101	0.000201681	sp|O75676|KS6A4_HUMAN	O75676	KS6A4_HUMAN	RPS6KA4	Ribosomal protein S6 kinase alpha-4
0.530017	0.389573	0.660977	0.636255	0.532007	1.04424	-1.8252	-1.18952	-0.778349	+	Cluster -3	942	3.102	0.0030155	sp|Q8TEY7|UBP33_HUMAN	Q8TEY7	UBP33_HUMAN	USP33	Ubiquitin carboxyl-terminal hydrolase 33
0.779456	0.338497	1.15052	0.502174	0.315022	0.69795	-1.72897	-1.11529	-0.939364	+	Cluster -3	759	3.08841	0.00305927	sp|Q14161|GIT2_HUMAN	Q14161	GIT2_HUMAN	GIT2	ARF GTPase-activating protein GIT2
1.50293	-0.336081	0.220623	1.3582	0.0274559	0.183032	-1.65448	-0.409902	-0.891778	+	Cluster -3	580	1.03132	0.0465997	sp|Q9H930|SP14L_HUMAN	Q9H930	SP14L_HUMAN	SP140L	Nuclear body protein SP140-like protein
1.44435	-0.196051	0.407853	0.678466	0.4122	0.251363	-2.0111	-0.985475	-0.0016057	+	Cluster -3	398	1.08116	0.0419965	sp|O14791|APOL1_HUMAN	O14791	APOL1_HUMAN	APOL1	Apolipoprotein L1
1.42592	-0.438467	0.48382	1.04988	0.258909	0.619358	-0.931157	-1.04134	-1.42692	+	Cluster -3	1503	1.68961	0.015317	sp|Q8IWU2|LMTK2_HUMAN	Q8IWU2	LMTK2_HUMAN	LMTK2	Serine/threonine-protein kinase LMTK2
1.6947	-0.427803	-0.0412775	1.00651	0.366973	0.605004	-1.01318	-1.13366	-1.05726	+	Cluster -3	126	1.38071	0.024488	sp|P06899|H2B1J_HUMAN	P06899	H2B1J_HUMAN	H2BC11	Histone H2B type 1-J
1.3121	-0.642267	0.166426	1.10997	0.376117	0.917479	-0.795986	-1.1822	-1.26164	+	Cluster -3	380	1.60031	0.0173695	sp|O00154|BACH_HUMAN	O00154	BACH_HUMAN	ACOT7	Cytosolic acyl coenzyme A thioester hydrolase
1.50269	-0.589497	0.0834157	0.874152	0.620404	0.753281	-0.766203	-1.32003	-1.15821	+	Cluster -3	709	1.52809	0.0191458	sp|Q14123|PDE1C_HUMAN	Q14123	PDE1C_HUMAN	PDE1C	Calcium/calmodulin-dependent 3',5'-cyclic nucleotide phosphodiesterase 1C
1.4772	-0.355193	-0.0529055	1.30478	-0.0829405	0.614823	-0.489885	-0.737085	-1.67879	+	Cluster -3	559	1.01169	0.0487061	sp|Q9BYJ9|YTHD1_HUMAN	Q9BYJ9	YTHD1_HUMAN	YTHDF1	YTH domain-containing family protein 1
1.80035	-0.273325	-0.0870747	0.939582	-0.105292	0.702198	-0.655167	-0.872496	-1.44878	+	Cluster -3	368	1.05169	0.0445317	sp|P78406|RAE1L_HUMAN	P78406	RAE1L_HUMAN	RAE1	mRNA export factor
1.72021	-0.275135	0.776382	0.566568	0.0780682	0.356241	-0.886162	-0.724106	-1.61207	+	Cluster -3	485	1.48457	0.0205993	sp|Q6AZZ1|TRI68_HUMAN	Q6AZZ1	TRI68_HUMAN	TRIM68	E3 ubiquitin-protein ligase TRIM68
1.62534	-0.506822	0.378967	0.743553	0.312067	0.626513	-1.02458	-0.556404	-1.59864	+	Cluster -3	351	1.30453	0.027907	sp|Q96J01|THOC3_HUMAN	Q96J01	THOC3_HUMAN	THOC3	THO complex subunit 3
1.6543	-0.47663	0.46115	0.678673	0.020032	0.713196	-0.635105	-0.691647	-1.72397	+	Cluster -3	672	1.13882	0.0370558	sp|P17252|KPCA_HUMAN	P17252	KPCA_HUMAN	PRKCA	Protein kinase C alpha type
1.39265	-0.324264	0.477802	0.611007	0.17103	0.961017	-0.73874	-0.726297	-1.8242	+	Cluster -3	419	1.4724	0.0209376	sp|Q8NHQ8|RASF8_HUMAN	Q8NHQ8	RASF8_HUMAN	RASSF8	Ras association domain-containing protein 8
1.70401	-0.316348	0.500966	0.454903	0.0649975	0.840177	-1.29816	-0.628361	-1.32219	+	Cluster -3	491	1.42662	0.0227441	sp|P22570|ADRO_HUMAN	P22570	ADRO_HUMAN	FDXR	NADPH:adrenodoxin oxidoreductase, mitochondrial
1.18097	-0.215127	0.417841	0.815485	0.412014	1.02667	-1.40389	-0.995712	-1.23825	+	Cluster -3	1710	2.41156	0.00568	sp|O94986|CE152_HUMAN	O94986	CE152_HUMAN	CEP152	Centrosomal protein of 152 kDa
1.06846	-0.0460375	-0.0146945	1.08598	0.581293	0.872475	-1.44241	-0.677453	-1.42762	+	Cluster -3	3664	2.351	0.0060575	sp|Q96T58|MINT_HUMAN	Q96T58	MINT_HUMAN	SPEN	Msx2-interacting protein
0.976403	0.0168113	0.125823	1.07572	0.301605	1.05414	-1.54935	-0.63426	-1.3669	+	Cluster -3	335	2.26172	0.00687237	sp|Q9NXR1|NDE1_HUMAN	Q9NXR1	NDE1_HUMAN	NDE1	Nuclear distribution protein nudE homolog 1
0.929655	-0.0476565	0.0858473	1.03565	0.511802	0.989768	-1.6149	-0.488097	-1.40207	+	Cluster -3	255	2.22808	0.00717949	sp|Q6DKI1|RL7L_HUMAN	Q6DKI1	RL7L_HUMAN	RPL7L1	60S ribosomal protein L7-like 1
0.913181	-0.379273	0.5883	0.197519	0.934064	1.27123	-1.13279	-1.15116	-1.24107	+	Cluster -3	540	2.16907	0.00789306	sp|Q9NZW5|MPP6_HUMAN	Q9NZW5	MPP6_HUMAN	MPP6	MAGUK p55 subfamily member 6
0.890803	0.0392902	0.628223	0.369469	0.715307	1.14309	-1.18565	-1.11548	-1.48505	+	Cluster -3	302	3.07078	0.00297398	sp|Q63HQ0|AP1AR_HUMAN	Q63HQ0	AP1AR_HUMAN	AP1AR	AP-1 complex-associated regulatory protein
0.721358	-0.331514	0.706824	0.869587	0.701424	1.01344	-1.29183	-1.00529	-1.38401	+	Cluster -3	1247	2.91222	0.003475	sp|O94885|SASH1_HUMAN	O94885	SASH1_HUMAN	SASH1	SAM and SH3 domain-containing protein 1
0.661158	-0.236165	0.69141	0.559128	0.893439	1.14661	-1.24371	-1.20762	-1.26425	+	Cluster -3	434	3.11786	0.00300787	sp|Q53EU6|GPAT3_HUMAN	Q53EU6	GPAT3_HUMAN	GPAT3	Glycerol-3-phosphate acyltransferase 3
0.887178	-0.714664	0.763532	0.548156	1.01772	0.917687	-1.07569	-1.30743	-1.0365	+	Cluster -3	1577	1.97719	0.0100735	sp|Q6XZF7|DNMBP_HUMAN	Q6XZF7	DNMBP_HUMAN	DNMBP	Dynamin-binding protein
0.959647	-0.645414	0.908629	0.66234	0.842116	0.765218	-1.09253	-1.07781	-1.3222	+	Cluster -3	508	2.00385	0.00968211	sp|O95319|CELF2_HUMAN	O95319	CELF2_HUMAN	CELF2	CUGBP Elav-like family member 2
1.23217	-0.45872	0.669869	0.681341	0.630664	0.82432	-1.13464	-1.17384	-1.27116	+	Cluster -3	1531	2.16971	0.00789809	sp|O94916|NFAT5_HUMAN	O94916	NFAT5_HUMAN	NFAT5	Nuclear factor of activated T-cells 5
1.30291	0.0403237	0.117495	0.446237	0.807495	0.928962	-1.26592	-0.920379	-1.45712	+	Cluster -3	1209	2.39185	0.00581937	sp|Q5T8A7|PPR26_HUMAN	Q5T8A7	PPR26_HUMAN	PPP1R26	Protein phosphatase 1 regulatory subunit 26
1.21101	-0.0222909	0.212915	0.246414	0.722968	1.19988	-0.954663	-1.05239	-1.56385	+	Cluster -3	470	2.15848	0.00800252	sp|Q9NWK9|BCD1_HUMAN	Q9NWK9	BCD1_HUMAN	ZNHIT6	Box C/D snoRNA protein 1
1.24282	0.093842	0.30665	0.478256	0.352533	1.19536	-1.0774	-1.1371	-1.45495	+	Cluster -3	364	2.42573	0.00546994	sp|Q53GG5|PDLI3_HUMAN	Q53GG5	PDLI3_HUMAN	PDLIM3	PDZ and LIM domain protein 3
1.25026	-0.169484	0.079488	0.780602	0.41196	1.07158	-0.877007	-0.793759	-1.75364	+	Cluster -3	740	1.85016	0.0116717	sp|Q9UER7|DAXX_HUMAN	Q9UER7	DAXX_HUMAN	DAXX	Death domain-associated protein 6
1.40839	-0.111004	0.134368	0.671952	0.602316	0.780117	-0.770808	-0.981833	-1.7335	+	Cluster -3	141	1.90157	0.0109489	sp|P01036|CYTS_HUMAN	P01036	CYTS_HUMAN	CST4	Cystatin-S
1.33842	-0.34716	0.3554	0.727904	0.751773	0.732303	-0.938243	-1.21799	-1.4024	+	Cluster -3	215	2.14396	0.00819307	sp|Q96EI5|TCAL4_HUMAN	Q96EI5	TCAL4_HUMAN	TCEAL4	Transcription elongation factor A protein-like 4
1.39053	-0.248232	0.162284	0.737815	0.850042	0.593086	-0.724193	-1.27379	-1.48754	+	Cluster -3	284	1.94522	0.0105884	sp|Q15475|SIX1_HUMAN	Q15475	SIX1_HUMAN	SIX1	Homeobox protein SIX1
1.41656	-0.408331	0.360908	0.517012	0.868334	0.69942	-0.790067	-1.41461	-1.24922	+	Cluster -3	955	1.83921	0.0119217	sp|Q7Z4H7|HAUS6_HUMAN	Q7Z4H7	HAUS6_HUMAN	HAUS6	HAUS augmin-like complex subunit 6
1.06187	-0.106388	0.531338	0.812541	0.897163	0.560139	-1.01832	-1.28656	-1.45179	+	Cluster -3	495	2.93405	0.0032832	sp|Q86SX3|TEDC1_HUMAN	Q86SX3	TEDC1_HUMAN	TEDC1	Tubulin epsilon and delta complex protein 1
1.12505	-0.174625	0.647525	0.534114	0.820766	0.716523	-0.77	-1.35997	-1.53939	+	Cluster -3	1124	2.43897	0.00521859	sp|P37275|ZEB1_HUMAN	P37275	ZEB1_HUMAN	ZEB1	Zinc finger E-box-binding homeobox 1
1.25005	0.0375967	0.13204	0.789222	0.696922	0.812577	-1.08839	-1.25768	-1.37234	+	Cluster -3	2804	2.76527	0.00406349	sp|Q6KC79|NIPBL_HUMAN	Q6KC79	NIPBL_HUMAN	NIPBL	Nipped-B-like protein
1.07431	0.115873	0.13543	0.943415	0.720775	0.771171	-1.17049	-1.08974	-1.50075	+	Cluster -3	841	3.13318	0.002912	sp|Q4V328|GRAP1_HUMAN	Q4V328	GRAP1_HUMAN	GRIPAP1	GRIP1-associated protein 1
1.12506	0.0605161	0.628164	0.561649	0.70937	0.743599	-1.32446	-1.05773	-1.44617	+	Cluster -3	379	3.24059	0.00290141	sp|P07902|GALT_HUMAN	P07902	GALT_HUMAN	GALT	Galactose-1-phosphate uridylyltransferase
1.28244	-0.0155747	0.473684	0.685736	0.711334	0.565539	-1.02112	-1.0285	-1.65354	+	Cluster -3	501	2.54415	0.00450489	sp|Q13610|PWP1_HUMAN	Q13610	PWP1_HUMAN	PWP1	Periodic tryptophan protein 1 homolog
1.28561	-0.173439	0.412965	0.698192	0.736459	0.656203	-1.15377	-0.828822	-1.6334	+	Cluster -3	941	2.26258	0.00685393	sp|O00408|PDE2A_HUMAN	O00408	PDE2A_HUMAN	PDE2A	cGMP-dependent 3',5'-cyclic phosphodiesterase
1.82098	-0.284392	0.40615	-0.0994845	0.590111	0.688008	-1.11511	-0.584395	-1.42187	+	Cluster -3	476	1.26443	0.0297314	sp|Q8IUH3|RBM45_HUMAN	Q8IUH3	RBM45_HUMAN	RBM45	RNA-binding protein 45
1.77278	-0.0570046	0.447995	0.200816	0.841012	0.184404	-1.2951	-1.0541	-1.04079	+	Cluster -3	569	1.738	0.0142114	sp|Q9H5N1|RABE2_HUMAN	Q9H5N1	RABE2_HUMAN	RABEP2	Rab GTPase-binding effector protein 2
1.86581	0.0446278	0.274243	0.00463095	0.746091	0.388594	-1.12589	-0.940255	-1.25785	+	Cluster -3	385	1.62783	0.016796	sp|Q9NXX6|NSE4A_HUMAN	Q9NXX6	NSE4A_HUMAN	NSMCE4A	Non-structural maintenance of chromosomes element 4 homolog A
1.86689	0.342938	0.469142	0.301153	0.42109	0.00362267	-1.25539	-0.967637	-1.18181	+	Cluster -3	521	2.12342	0.0085	sp|Q08209|PP2BA_HUMAN	Q08209	PP2BA_HUMAN	PPP3CA	Serine/threonine-protein phosphatase 2B catalytic subunit alpha isoform
1.44544	0.465742	0.403139	0.293255	0.757807	0.34247	-1.53699	-0.953034	-1.21783	+	Cluster -3	760	2.72948	0.00406591	sp|Q9BRB3|PIGQ_HUMAN	Q9BRB3	PIGQ_HUMAN	PIGQ	Phosphatidylinositol N-acetylglucosaminyltransferase subunit Q
1.55202	0.10319	0.601418	0.347914	0.733515	0.279584	-1.2948	-0.929794	-1.39306	+	Cluster -3	1012	2.34495	0.00612983	sp|Q9BVI0|PHF20_HUMAN	Q9BVI0	PHF20_HUMAN	PHF20	PHD finger protein 20
1.49665	0.177537	0.429771	0.522772	0.711977	0.341579	-1.4196	-0.934973	-1.32571	+	Cluster -3	403	2.49212	0.00501382	sp|P57723|PCBP4_HUMAN	P57723	PCBP4_HUMAN	PCBP4	Poly(rC)-binding protein 4
1.64492	0.0407632	0.327533	0.499042	0.76611	0.0233092	-1.09462	-0.505599	-1.70146	+	Cluster -3	943	1.53545	0.0189227	sp|Q03188|CENPC_HUMAN	Q03188	CENPC_HUMAN	CENPC	Centromere protein C
1.38988	0.352827	0.444662	0.3093	0.682586	0.398796	-1.24328	-0.553364	-1.78141	+	Cluster -3	1454	2.18711	0.00758755	sp|O60244|MED14_HUMAN	O60244	MED14_HUMAN	MED14	Mediator of RNA polymerase II transcription subunit 14
1.48757	-0.284476	0.593982	0.260342	0.885589	0.576493	-1.32859	-1.13902	-1.05189	+	Cluster -3	235	1.93939	0.0106745	sp|Q9UJ68|MSRA_HUMAN	Q9UJ68	MSRA_HUMAN	MSRA	Mitochondrial peptide methionine sulfoxide reductase
1.45065	-0.263501	0.640964	0.293824	0.672364	0.751035	-0.980207	-1.45883	-1.1063	+	Cluster -3	514	2.00781	0.00962877	sp|Q9BYT3|STK33_HUMAN	Q9BYT3	STK33_HUMAN	STK33	Serine/threonine-protein kinase 33
1.62731	-0.19229	0.529822	0.340677	0.554652	0.645906	-1.10866	-1.41128	-0.986132	+	Cluster -3	441	1.92632	0.0107168	sp|Q92551|IP6K1_HUMAN	Q92551	IP6K1_HUMAN	IP6K1	Inositol hexakisphosphate kinase 1
1.71964	-0.675505	0.351617	0.779906	0.615971	0.325021	-0.829768	-1.3253	-0.961582	+	Cluster -3	1132	1.22446	0.032002	sp|Q9Y2H2|SAC2_HUMAN	Q9Y2H2	SAC2_HUMAN	INPP5F	Phosphatidylinositide phosphatase SAC2
1.49218	-0.27269	0.499772	0.680664	0.699069	0.414231	-0.924352	-1.5395	-1.04938	+	Cluster -3	1181	1.92356	0.010756	sp|Q6AI08|HEAT6_HUMAN	Q6AI08	HEAT6_HUMAN	HEATR6	HEAT repeat-containing protein 6
1.34331	-0.294738	0.55336	0.791817	0.819134	0.396956	-1.15662	-1.22765	-1.22557	+	Cluster -3	707	2.21883	0.007192	sp|Q8TBC3|SHKB1_HUMAN	Q8TBC3	SHKB1_HUMAN	SHKBP1	SH3KBP1-binding protein 1
1.53962	-0.475185	0.55748	0.936727	0.569915	0.250403	-1.07475	-1.24758	-1.05664	+	Cluster -3	1086	1.63075	0.0168279	sp|Q13423|NNTM_HUMAN	Q13423	NNTM_HUMAN	NNT	NAD(P) transhydrogenase, mitochondrial
1.49772	-0.0995882	0.313067	0.781823	0.691994	0.424321	-1.07549	-1.34407	-1.18977	+	Cluster -3	359	2.19802	0.00736993	sp|O43488|ARK72_HUMAN	O43488	ARK72_HUMAN	AKR7A2	Aflatoxin B1 aldehyde reductase member 2
1.61657	0.0333671	0.14309	0.859168	0.528357	0.333082	-0.888335	-1.34097	-1.28433	+	Cluster -3	799	1.92454	0.0107434	sp|Q6ZSY5|PPR3F_HUMAN	Q6ZSY5	PPR3F_HUMAN	PPP1R3F	Protein phosphatase 1 regulatory subunit 3F
1.52545	0.0189614	0.667255	0.29026	0.503856	0.619657	-1.01782	-1.11737	-1.49024	+	Cluster -3	359	2.34559	0.00613932	sp|O94992|HEXI1_HUMAN	O94992	HEXI1_HUMAN	HEXIM1	Protein HEXIM1
1.37021	-0.331877	0.823359	0.558369	0.427546	0.673692	-0.821335	-1.1676	-1.53236	+	Cluster -3	780	1.94823	0.0105126	sp|Q93034|CUL5_HUMAN	Q93034	CUL5_HUMAN	CUL5	Cullin-5
1.41944	0.169914	0.669728	0.49097	0.674892	0.202634	-0.800858	-1.15483	-1.67188	+	Cluster -3	533	2.37935	0.00593424	sp|P28702|RXRB_HUMAN	P28702	RXRB_HUMAN	RXRB	Retinoic acid receptor RXR-beta
1.40807	0.218466	0.856904	0.430948	0.56253	0.171786	-0.798109	-1.38216	-1.46844	+	Cluster -3	1849	2.64091	0.00441117	sp|O14981|BTAF1_HUMAN	O14981	BTAF1_HUMAN	BTAF1	TATA-binding protein-associated factor 172
1.59522	-0.127996	0.750633	0.525167	0.720733	-0.0135069	-0.904663	-1.16888	-1.37671	+	Cluster -3	269	1.88262	0.011275	sp|Q8WUU5|GATD1_HUMAN	Q8WUU5	GATD1_HUMAN	GATAD1	GATA zinc finger domain-containing protein 1
1.87467	-0.0524392	0.915691	0.17294	0.188401	0.120237	-0.820516	-1.11674	-1.28225	+	Cluster -3	680	1.82661	0.0121617	sp|Q8IVH2|FOXP4_HUMAN	Q8IVH2	FOXP4_HUMAN	FOXP4	Forkhead box protein P4
1.5813	-0.197477	1.12707	0.330896	0.35195	0.212977	-1.00574	-1.10674	-1.29425	+	Cluster -3	1430	1.97098	0.0101459	sp|P53355|DAPK1_HUMAN	P53355	DAPK1_HUMAN	DAPK1	Death-associated protein kinase 1
1.64323	-0.0400436	0.858463	0.473251	0.602257	-0.140959	-1.06416	-1.393	-0.939041	+	Cluster -3	743	1.91182	0.0108075	sp|Q86V87|F16B2_HUMAN	Q86V87	F16B2_HUMAN	FAM160B2	Protein FAM160B2
1.90966	-0.220985	0.597507	0.295312	0.422857	0.275354	-1.01707	-1.05605	-1.20659	+	Cluster -3	4678	1.5998	0.0173814	sp|O75592|MYCB2_HUMAN	O75592	MYCB2_HUMAN	MYCBP2	E3 ubiquitin-protein ligase MYCBP2
1.7634	-0.0339446	0.544547	0.385577	0.453458	0.372566	-0.988074	-1.29631	-1.20122	+	Cluster -3	1190	1.98974	0.00991187	sp|Q9UDY2|ZO2_HUMAN	Q9UDY2	ZO2_HUMAN	TJP2	Tight junction protein ZO-2
1.89455	-0.0782198	0.43125	0.319709	0.40985	0.376217	-1.0194	-1.31533	-1.01863	+	Cluster -3	1906	1.70577	0.0150122	sp|Q7Z5J4|RAI1_HUMAN	Q7Z5J4	RAI1_HUMAN	RAI1	Retinoic acid-induced protein 1
1.88157	-0.200946	0.441367	0.521393	0.572688	0.0646181	-1.23041	-0.976362	-1.07392	+	Cluster -3	1128	1.53442	0.0189376	sp|Q9Y2A7|NCKP1_HUMAN	Q9Y2A7	NCKP1_HUMAN	NCKAP1	Nck-associated protein 1
1.98396	-0.508226	0.603719	0.416771	0.539006	-0.0557324	-0.895979	-1.02585	-1.05766	+	Cluster -3	1017	1.14215	0.0367623	sp|A8MW92|P20L1_HUMAN	A8MW92	P20L1_HUMAN	PHF20L1	PHD finger protein 20-like protein 1
1.62911	0.924625	-0.331506	-0.489764	0.905109	0.213968	-1.55542	-0.7402	-0.555923	+	Cluster -3	488	1.07281	0.0427289	sp|Q92769|HDAC2_HUMAN	Q92769	HDAC2_HUMAN	HDAC2	Histone deacetylase 2
1.75937	0.526847	0.157324	0.0433338	0.532304	0.233543	-1.55939	-1.2923	-0.401033	+	Cluster -3	1023	1.64422	0.0165115	sp|Q6P4F7|RHGBA_HUMAN	Q6P4F7	RHGBA_HUMAN	ARHGAP11A	Rho GTPase-activating protein 11A
1.87143	0.631315	-0.180409	-0.0977662	0.149496	0.722355	-1.36995	-1.13327	-0.593191	+	Cluster -3	857	1.36473	0.0250141	sp|P33981|TTK_HUMAN	P33981	TTK_HUMAN	TTK	Dual specificity protein kinase TTK
1.25395	0.456753	-0.270488	0.202681	0.669481	1.00676	-0.996575	-1.85145	-0.471114	+	Cluster -3	1435	1.53668	0.0188821	sp|Q76L83|ASXL2_HUMAN	Q76L83	ASXL2_HUMAN	ASXL2	Putative Polycomb group protein ASXL2
1.27684	0.707618	-0.740249	0.385679	0.564307	0.861653	-1.08486	-1.68977	-0.281213	+	Cluster -3	625	1.16275	0.0355384	sp|Q14677|EPN4_HUMAN	Q14677	EPN4_HUMAN	CLINT1	Clathrin interactor 1
1.46651	0.438251	-0.241158	0.856924	0.569283	0.374636	-1.64806	-1.03984	-0.776545	+	Cluster -3	1282	1.809	0.0126082	sp|Q14692|BMS1_HUMAN	Q14692	BMS1_HUMAN	BMS1	Ribosome biogenesis protein BMS1 homolog
1.42733	0.54703	-0.394762	0.402804	0.839934	0.629179	-1.56158	-1.04392	-0.846015	+	Cluster -3	2481	1.78724	0.0130153	sp|Q96AY4|TTC28_HUMAN	Q96AY4	TTC28_HUMAN	TTC28	Tetratricopeptide repeat protein 28
1.55054	0.732619	-0.503619	0.808276	0.483648	0.277483	-1.10497	-1.34844	-0.895541	+	Cluster -3	312	1.57685	0.0178393	sp|Q12904|AIMP1_HUMAN	Q12904	AIMP1_HUMAN	AIMP1	Aminoacyl tRNA synthase complex-interacting multifunctional protein 1
1.70714	0.655156	-0.612571	0.0238366	0.682525	0.601651	-1.44024	-0.996331	-0.621161	+	Cluster -3	381	1.15665	0.0358005	sp|Q13601|KRR1_HUMAN	Q13601	KRR1_HUMAN	KRR1	KRR1 small subunit processome component homolog
1.84559	0.671413	-0.702686	0.0291883	0.781351	0.291647	-1.00058	-1.19909	-0.716837	+	Cluster -3	129	1.01794	0.0478959	sp|Q9BRT6|LLPH_HUMAN	Q9BRT6	LLPH_HUMAN	LLPH	Protein LLP homolog
1.56813	0.739631	-0.737643	0.222977	0.751099	0.61478	-1.11532	-1.2726	-0.77105	+	Cluster -3	651	1.2734	0.029346	sp|P49757|NUMB_HUMAN	P49757	NUMB_HUMAN	NUMB	Protein numb homolog
1.71044	0.287403	-0.727866	0.459199	0.894307	0.384124	-0.730906	-1.4366	-0.840094	+	Cluster -3	1096	1.09933	0.0403054	sp|O75151|PHF2_HUMAN	O75151	PHF2_HUMAN	PHF2	Lysine-specific demethylase PHF2
1.30577	0.837702	-0.60677	1.01717	0.150883	0.397454	-0.414164	-1.6797	-1.00834	+	Cluster -3	209	1.19871	0.0334969	sp|O75496|GEMI_HUMAN	O75496	GEMI_HUMAN	GMNN	Geminin
1.4442	1.1829	-0.587686	0.583336	-0.0128151	0.43789	-0.434196	-1.43601	-1.17762	+	Cluster -3	298	1.20273	0.0332913	sp|P50053|KHK_HUMAN	P50053	KHK_HUMAN	KHK	Ketohexokinase
0.949547	0.772215	-0.378125	1.18477	0.502361	0.576084	-1.10853	-1.35284	-1.14548	+	Cluster -3	572	2.31406	0.00645509	sp|Q96I24|FUBP3_HUMAN	Q96I24	FUBP3_HUMAN	FUBP3	Far upstream element-binding protein 3
1.13871	1.07474	-0.159798	0.890633	0.0560756	0.557557	-0.861356	-1.4858	-1.21077	+	Cluster -3	826	2.08049	0.00886225	sp|Q16665|HIF1A_HUMAN	Q16665	HIF1A_HUMAN	HIF1A	Hypoxia-inducible factor 1-alpha
1.19073	0.705118	-0.215411	0.830919	0.32858	0.763003	-0.734467	-1.48167	-1.3868	+	Cluster -3	508	2.1813	0.00772645	sp|P11831|SRF_HUMAN	P11831	SRF_HUMAN	SRF	Serum response factor
0.982071	1.26639	-0.883962	0.621755	0.845745	0.240488	-1.21003	-1.31344	-0.54902	+	Cluster -3	634	1.16952	0.0351337	sp|Q9BZE4|NOG1_HUMAN	Q9BZE4	NOG1_HUMAN	GTPBP4	Nucleolar GTP-binding protein 1
0.791327	1.16162	-0.509258	0.448582	0.792442	0.800602	-1.42232	-1.29979	-0.763208	+	Cluster -3	1883	1.89605	0.0110314	sp|Q92545|TM131_HUMAN	Q92545	TM131_HUMAN	TMEM131	Transmembrane protein 131
1.07642	1.01375	-0.902578	0.877996	0.557869	0.588996	-0.975465	-1.35972	-0.877269	+	Cluster -3	2701	1.40402	0.023596	sp|Q02224|CENPE_HUMAN	Q02224	CENPE_HUMAN	CENPE	Centromere-associated protein E
1.03745	1.05925	-0.776579	0.65028	0.651169	0.739791	-1.2799	-1.03579	-1.04568	+	Cluster -3	1498	1.64467	0.0164859	sp|P42695|CNDD3_HUMAN	P42695	CNDD3_HUMAN	NCAPD3	Condensin-2 complex subunit D3
0.736904	1.28823	-0.838353	1.01759	0.199971	0.714657	-0.780957	-1.45649	-0.881557	+	Cluster -3	1820	1.25923	0.0299578	sp|Q96Q89|KI20B_HUMAN	Q96Q89	KI20B_HUMAN	KIF20B	Kinesin-like protein KIF20B
0.517352	1.24179	-0.955396	0.996745	0.420272	0.862191	-1.2033	-1.21327	-0.666383	+	Cluster -3	263	1.32889	0.0266899	sp|Q9BU76|MMTA2_HUMAN	Q9BU76	MMTA2_HUMAN	MMTAG2	Multiple myeloma tumor-associated protein 2
0.367454	1.37956	-0.327708	1.06987	0.364678	0.576038	-1.03794	-1.58773	-0.80422	+	Cluster -3	110	1.76789	0.0133684	sp|O75920|SERF1_HUMAN	O75920	SERF1_HUMAN	SERF1A	Small EDRK-rich factor 1
1.19581	1.38815	-0.622185	0.802314	0.302017	0.17039	-1.06575	-1.09236	-1.07839	+	Cluster -3	914	1.42299	0.0228694	sp|Q9H8V3|ECT2_HUMAN	Q9H8V3	ECT2_HUMAN	ECT2	Protein ECT2
0.993057	1.34617	-0.512247	0.722602	-0.0023527	0.806421	-1.15683	-1.01033	-1.18649	+	Cluster -3	222	1.58972	0.0175823	sp|Q16763|UBE2S_HUMAN	Q16763	UBE2S_HUMAN	UBE2S	Ubiquitin-conjugating enzyme E2 S
1.348	1.65969	-0.445859	0.228971	-0.0160936	0.219906	-0.801361	-1.29806	-0.895187	+	Cluster -3	3477	1.38622	0.0242685	sp|Q8IZT6|ASPM_HUMAN	Q8IZT6	ASPM_HUMAN	ASPM	Abnormal spindle-like microcephaly-associated protein
1.35456	1.51005	-0.367758	0.202871	-0.0722432	0.540121	-1.04366	-1.24468	-0.879267	+	Cluster -3	208	1.55386	0.0184161	sp|Q8WUY1|THEM6_HUMAN	Q8WUY1	THEM6_HUMAN	THEM6	Protein THEM6
1.22827	1.41322	-0.38509	0.40376	0.0156555	0.619628	-0.766915	-1.34718	-1.18135	+	Cluster -3	771	1.61111	0.017125	sp|Q9BVJ6|UT14A_HUMAN	Q9BVJ6	UT14A_HUMAN	UTP14A	U3 small nucleolar RNA-associated protein 14 homolog A
1.191	1.30897	-0.207675	0.713323	0.200775	0.274177	-0.855796	-1.4209	-1.20388	+	Cluster -3	317	1.98788	0.00991727	sp|Q9P0W2|HM20B_HUMAN	Q9P0W2	HM20B_HUMAN	HMG20B	SWI/SNF-related matrix-associated actin-dependent regulator of chromatin subfamily E member 1-related
1.09735	1.45654	-0.109474	0.470425	0.0834251	0.494492	-0.959703	-1.44023	-1.09282	+	Cluster -3	725	2.11702	0.00853189	sp|Q99661|KIF2C_HUMAN	Q99661	KIF2C_HUMAN	KIF2C	Kinesin-like protein KIF2C
1.1357	1.4381	-0.0158642	0.398592	0.220035	0.354961	-0.859707	-1.32735	-1.34446	+	Cluster -3	1132	2.3223	0.00636925	sp|Q6P0N0|M18BP_HUMAN	Q6P0N0	M18BP_HUMAN	MIS18BP1	Mis18-binding protein 1
0.942842	1.65046	-0.289343	0.485676	0.0630756	0.5092	-0.977145	-1.13862	-1.24615	+	Cluster -3	520	1.74882	0.0140119	sp|Q16875|F263_HUMAN	Q16875	F263_HUMAN	PFKFB3	6-phosphofructo-2-kinase/fructose-2,6-bisphosphatase 3
0.971534	1.36558	-0.14381	0.499642	0.785367	0.0859834	-1.20304	-1.00495	-1.35631	+	Cluster -3	290	2.15078	0.00808463	sp|Q969X5|ERGI1_HUMAN	Q969X5	ERGI1_HUMAN	ERGIC1	Endoplasmic reticulum-Golgi intermediate compartment protein 1
0.655315	1.37916	-0.160909	0.507399	1.07855	-0.0227037	-1.0985	-0.794449	-1.54386	+	Cluster -3	330	1.75626	0.013797	sp|Q86SK9|SCD5_HUMAN	Q86SK9	SCD5_HUMAN	SCD5	Stearoyl-CoA desaturase 5
1.05587	1.64021	-0.0676897	0.244243	0.56697	-0.151358	-0.935135	-0.908931	-1.44417	+	Cluster -3	425	1.84057	0.0119163	sp|Q09028|RBBP4_HUMAN	Q09028	RBBP4_HUMAN	RBBP4	Histone-binding protein RBBP4
0.893095	1.2046	-0.15221	0.524176	0.739889	0.514363	-1.15769	-1.3479	-1.21831	+	Cluster -3	3256	2.6314	0.00440573	sp|P46013|KI67_HUMAN	P46013	KI67_HUMAN	MKI67	Proliferation marker protein Ki-67
0.834726	1.47888	-0.11107	0.439684	0.52069	0.459512	-1.14615	-1.39405	-1.08222	+	Cluster -3	795	2.33092	0.00625228	sp|Q9P0L2|MARK1_HUMAN	Q9P0L2	MARK1_HUMAN	MARK1	Serine/threonine-protein kinase MARK1
0.871944	1.23563	-0.329411	0.917922	0.618069	0.273396	-1.23592	-1.25496	-1.09667	+	Cluster -3	475	2.12606	0.00841707	sp|O43818|U3IP2_HUMAN	O43818	U3IP2_HUMAN	RRP9	U3 small nucleolar RNA-interacting protein 2
0.808612	1.29461	-0.14648	0.780505	0.604956	0.340446	-1.08203	-1.3515	-1.24911	+	Cluster -3	313	2.46071	0.00506667	sp|Q9UNQ2|DIM1_HUMAN	Q9UNQ2	DIM1_HUMAN	DIMT1	Probable dimethyladenosine transferase
0.92073	1.34153	-0.383043	0.737454	0.650943	0.254632	-1.04691	-1.15476	-1.32058	+	Cluster -3	642	1.95247	0.0104739	sp|Q9BTE3|MCMBP_HUMAN	Q9BTE3	MCMBP_HUMAN	MCMBP	Mini-chromosome maintenance complex-binding protein
0.501405	1.52335	-0.343291	0.777544	0.58906	0.471815	-1.2027	-1.20762	-1.10957	+	Cluster -3	1384	1.94266	0.0106136	sp|P78357|CNTP1_HUMAN	P78357	CNTP1_HUMAN	CNTNAP1	Contactin-associated protein 1
0.266293	1.53414	-0.80915	0.604988	0.76986	0.701935	-0.582403	-1.09984	-1.38582	+	Cluster -3	689	1.23641	0.0312534	sp|Q7L2J0|MEPCE_HUMAN	Q7L2J0	MEPCE_HUMAN	MEPCE	7SK snRNA methylphosphate capping enzyme
0.575677	1.55919	-0.984296	0.316003	1.0007	0.491471	-0.918932	-0.997207	-1.04261	+	Cluster -3	419	1.05828	0.0439537	sp|Q9Y6E2|BZW2_HUMAN	Q9Y6E2	BZW2_HUMAN	BZW2	Basic leucine zipper and W2 domain-containing protein 2
0.982141	1.77119	-0.708023	0.304272	0.230153	0.414469	-0.752344	-1.10303	-1.13883	+	Cluster -3	582	1.14703	0.0364002	sp|Q9NVN8|GNL3L_HUMAN	Q9NVN8	GNL3L_HUMAN	GNL3L	Guanine nucleotide-binding protein-like 3-like protein
0.630339	1.79862	-0.497254	0.353846	0.655932	0.272774	-0.940311	-1.03476	-1.23919	+	Cluster -3	288	1.38464	0.0243094	sp|O14732|IMPA2_HUMAN	O14732	IMPA2_HUMAN	IMPA2	Inositol monophosphatase 2
1.06058	0.789651	-0.0300649	-0.258122	1.36176	0.520282	-0.997431	-1.41183	-1.03483	+	Cluster -3	98	1.76596	0.013399	sp|Q99584|S10AD_HUMAN	Q99584	S10AD_HUMAN	S100A13	Protein S100-A13
0.831434	1.16882	0.166465	-0.267093	1.07612	0.594495	-1.39134	-1.19533	-0.983575	+	Cluster -3	461	2.15554	0.0080075	sp|P56182|RRP1_HUMAN	P56182	RRP1_HUMAN	RRP1	Ribosomal RNA processing protein 1 homolog A
1.24483	0.854008	0.252062	0.292359	1.06919	-0.0974702	-1.0044	-1.26633	-1.34424	+	Cluster -3	86	2.39877	0.00576355	sp|P49458|SRP09_HUMAN	P49458	SRP09_HUMAN	SRP9	Signal recognition particle 9 kDa protein
1.27184	1.02862	0.172233	0.0400739	0.899204	0.222463	-1.34466	-1.093	-1.19678	+	Cluster -3	437	2.57447	0.00448049	sp|Q9H0U9|TSYL1_HUMAN	Q9H0U9	TSYL1_HUMAN	TSPYL1	Testis-specific Y-encoded-like protein 1
0.842647	1.32791	0.483828	0.0514729	0.56084	0.43847	-1.15263	-1.58995	-0.962586	+	Cluster -3	202	3.1605	0.00298333	sp|O95997|PTTG1_HUMAN	O95997	PTTG1_HUMAN	PTTG1	Securin
1.01407	1.51097	0.473843	0.103262	0.241436	0.133819	-0.890325	-1.63857	-0.9485	+	Cluster -3	802	2.85359	0.00372793	sp|Q99459|CDC5L_HUMAN	Q99459	CDC5L_HUMAN	CDC5L	Cell division cycle 5-like protein
1.19936	1.35596	0.241011	0.298917	0.213035	0.280035	-1.24384	-1.45175	-0.892724	+	Cluster -3	796	2.85754	0.00369186	sp|Q96GQ7|DDX27_HUMAN	Q96GQ7	DDX27_HUMAN	DDX27	Probable ATP-dependent RNA helicase DDX27
1.38181	1.18078	0.0249622	0.055399	0.435758	0.347483	-0.97594	-1.68756	-0.762691	+	Cluster -3	663	2.08008	0.00886816	sp|Q96MT1|RN145_HUMAN	Q96MT1	RN145_HUMAN	RNF145	RING finger protein 145
1.31431	1.16029	0.19334	-0.0296356	0.54389	0.19649	-1.21865	-1.68651	-0.473528	+	Cluster -3	469	2.05381	0.00923197	sp|Q5R3I4|TTC38_HUMAN	Q5R3I4	TTC38_HUMAN	TTC38	Tetratricopeptide repeat protein 38
1.16872	1.04928	-0.0883624	0.433657	0.0320969	0.817307	-1.37648	-1.6099	-0.426315	+	Cluster -3	3336	1.76937	0.0132701	sp|O95613|PCNT_HUMAN	O95613	PCNT_HUMAN	PCNT	Pericentrin
1.35048	0.991486	-0.265983	0.432097	0.390755	0.559659	-1.30228	-1.55204	-0.604174	+	Cluster -3	687	1.84637	0.0117835	sp|Q9NVU7|SDA1_HUMAN	Q9NVU7	SDA1_HUMAN	SDAD1	Protein SDA1 homolog
1.51278	0.839794	0.198287	0.382992	0.101364	0.495875	-1.33391	-1.52926	-0.667918	+	Cluster -3	361	2.31389	0.00644544	sp|O75683|SURF6_HUMAN	O75683	SURF6_HUMAN	SURF6	Surfeit locus protein 6
1.44603	0.708082	0.208836	0.172917	0.236174	0.860676	-0.923034	-1.43966	-1.27002	+	Cluster -3	1288	2.46899	0.0049566	sp|O95382|M3K6_HUMAN	O95382	M3K6_HUMAN	MAP3K6	Mitogen-activated protein kinase kinase kinase 6
1.69043	0.80005	-0.0423448	-0.0182764	0.426327	0.590182	-1.1285	-1.23104	-1.08684	+	Cluster -3	1821	2.00959	0.00962122	sp|Q8WWQ0|PHIP_HUMAN	Q8WWQ0	PHIP_HUMAN	PHIP	PH-interacting protein
1.75242	0.841486	-0.387202	0.0502315	0.191307	0.711503	-0.753918	-1.38076	-1.02506	+	Cluster -3	904	1.39314	0.0240612	sp|Q96DY7|MTBP_HUMAN	Q96DY7	MTBP_HUMAN	MTBP	Mdm2-binding protein
1.37183	1.32836	0.0240639	-0.0967255	0.102838	0.649497	-1.17347	-1.32686	-0.879544	+	Cluster -3	633	2.11741	0.00853494	sp|Q8TDN4|CABL1_HUMAN	Q8TDN4	CABL1_HUMAN	CABLES1	CDK5 and ABL1 enzyme substrate 1
1.49467	1.21377	0.0391742	-0.409	0.0839489	0.753479	-0.874657	-1.41138	-0.890001	+	Cluster -3	627	1.7677	0.0133727	sp|O60826|CCD22_HUMAN	O60826	CCD22_HUMAN	CCDC22	Coiled-coil domain-containing protein 22
1.44207	1.29392	-0.132279	-0.13967	0.315352	0.582433	-1.08801	-1.10849	-1.16534	+	Cluster -3	1419	1.95703	0.010362	sp|Q86US8|EST1A_HUMAN	Q86US8	EST1A_HUMAN	SMG6	Telomerase-binding protein EST1A
1.51751	1.19409	-0.0578124	-0.223692	0.190942	0.65718	-0.768506	-1.18543	-1.32428	+	Cluster -3	315	1.8457	0.0118066	sp|Q8NEJ9|NGDN_HUMAN	Q8NEJ9	NGDN_HUMAN	NGDN	Neuroguidin
1.37535	1.44693	-0.178081	-0.381799	0.173421	0.66307	-1.33133	-1.01233	-0.755224	+	Cluster -3	408	1.56892	0.0180167	sp|Q6PIU2|NCEH1_HUMAN	Q6PIU2	NCEH1_HUMAN	NCEH1	Neutral cholesterol ester hydrolase 1
1.74145	1.10067	-0.182531	-0.358067	0.10516	0.649392	-1.18628	-0.878942	-0.990849	+	Cluster -3	192	1.5277	0.0191335	sp|Q15126|PMVK_HUMAN	Q15126	PMVK_HUMAN	PMVK	Phosphomevalonate kinase
0.976205	1.41249	-0.262046	0.0859897	0.30167	0.930858	-1.35159	-1.04998	-1.0436	+	Cluster -3	1167	1.83478	0.0119931	sp|Q76FK4|NOL8_HUMAN	Q76FK4	NOL8_HUMAN	NOL8	Nucleolar protein 8
1.0981	1.17683	-0.146034	-0.0823649	0.454752	0.95413	-1.58602	-0.959011	-0.910383	+	Cluster -3	146	1.8575	0.0116725	sp|Q9GZY4|COA1_HUMAN	Q9GZY4	COA1_HUMAN	COA1	Cytochrome c oxidase assembly factor 1 homolog
1.09624	1.45929	-0.167328	0.0542263	0.0367101	0.755685	-1.68987	-0.682241	-0.862714	+	Cluster -3	1053	1.58399	0.0176642	sp|O95625|ZBT11_HUMAN	O95625	ZBT11_HUMAN	ZBTB11	Zinc finger and BTB domain-containing protein 11
0.932876	1.41423	-0.0801408	0.0565226	0.342641	0.871629	-1.003	-1.37796	-1.1568	+	Cluster -3	1309	2.11597	0.00854808	sp|O75153|CLU_HUMAN	O75153	CLU_HUMAN	CLUH	Clustered mitochondria protein homolog
1.03924	1.39989	-0.204484	0.131925	0.694755	0.469736	-1.23251	-1.01328	-1.28527	+	Cluster -3	625	2.08145	0.0088776	sp|Q8IZ69|TRM2A_HUMAN	Q8IZ69	TRM2A_HUMAN	TRMT2A	tRNA (uracil-5-)-methyltransferase homolog A
1.23314	1.42638	-0.264064	0.0745493	0.492395	0.40414	-1.46189	-1.03219	-0.872461	+	Cluster -3	253	1.8094	0.0126034	sp|Q9Y3A2|UTP11_HUMAN	Q9Y3A2	UTP11_HUMAN	UTP11	Probable U3 small nucleolar RNA-associated protein 11
1.30917	1.64601	-0.405815	-0.057116	0.379036	0.184795	-1.28409	-0.808256	-0.963733	+	Cluster -3	225	1.44704	0.0220363	sp|Q9P016|THYN1_HUMAN	Q9P016	THYN1_HUMAN	THYN1	Thymocyte nuclear protein 1
1.22619	1.54964	-0.436553	0.2661	0.424664	0.23684	-1.15675	-0.926839	-1.18328	+	Cluster -3	930	1.60629	0.0172301	sp|P98175|RBM10_HUMAN	P98175	RBM10_HUMAN	RBM10	RNA-binding protein 10
1.53925	1.2626	-0.0912772	0.0240483	0.578945	0.00201263	-1.22937	-1.093	-0.993211	+	Cluster -3	681	1.96935	0.0101394	sp|O00566|MPP10_HUMAN	O00566	MPP10_HUMAN	MPHOSPH10	U3 small nucleolar ribonucleoprotein protein MPP10
0.145888	1.25022	0.283141	0.064476	1.08091	0.759787	-0.74803	-1.37597	-1.46043	+	Cluster -3	492	2.1237	0.00847116	sp|Q9GZU3|TM39B_HUMAN	Q9GZU3	TM39B_HUMAN	TMEM39B	Transmembrane protein 39B
0.245368	1.25218	0.147078	0.207786	1.096	0.644009	-0.688353	-1.43693	-1.46714	+	Cluster -3	392	2.15354	0.00801249	sp|Q9NWT1|PK1IP_HUMAN	Q9NWT1	PK1IP_HUMAN	PAK1IP1	p21-activated protein kinase-interacting protein 1
0.305067	1.35896	-0.137064	0.0957878	1.0418	0.791033	-0.859592	-1.62406	-0.971926	+	Cluster -3	724	1.8045	0.0128027	sp|P27986|P85A_HUMAN	P27986	P85A_HUMAN	PIK3R1	Phosphatidylinositol 3-kinase regulatory subunit alpha
0.148984	0.719948	0.258587	0.201562	1.0427	1.2645	-1.03473	-1.62565	-0.975904	+	Cluster -3	1154	2.62021	0.00444929	sp|Q8NEN9|PDZD8_HUMAN	Q8NEN9	PDZD8_HUMAN	PDZD8	PDZ domain-containing protein 8
0.417913	0.628663	-0.138104	0.35672	1.52209	0.767757	-1.07675	-1.51049	-0.967799	+	Cluster -3	1584	2.49655	0.00499349	sp|Q5SW79|CE170_HUMAN	Q5SW79	CE170_HUMAN	CEP170	Centrosomal protein of 170 kDa
0.635634	0.522964	0.147874	0.377599	1.17635	0.940409	-1.06614	-1.45089	-1.28379	+	Cluster -3	1150	3.50804	0.0029835	sp|Q06190|P2R3A_HUMAN	Q06190	P2R3A_HUMAN	PPP2R3A	Serine/threonine-protein phosphatase 2A regulatory subunit B'' subunit alpha
0.600403	0.699003	0.258435	0.600389	0.940214	0.732396	-0.881491	-1.77207	-1.17728	+	Cluster -3	350	3.42554	0.00308605	sp|Q9H813|PACC1_HUMAN	Q9H813	PACC1_HUMAN	PACC1	Proton-activated chloride channel
0.600832	0.727717	-0.213636	0.424691	0.950528	1.09385	-0.908289	-1.77302	-0.902679	+	Cluster -3	497	2.39591	0.00579378	sp|Q9UJA5|TRM6_HUMAN	Q9UJA5	TRM6_HUMAN	TRMT6	tRNA (adenine(58)-N(1))-methyltransferase non-catalytic subunit TRM6
0.591991	1.15386	-0.39161	0.522128	1.18915	0.490288	-1.07803	-1.29298	-1.1848	+	Cluster -3	504	2.1312	0.00835517	sp|Q9UMS4|PRP19_HUMAN	Q9UMS4	PRP19_HUMAN	PRPF19	Pre-mRNA-processing factor 19
0.831809	0.998478	-0.200702	0.390365	1.17052	0.453123	-1.12994	-1.02547	-1.48818	+	Cluster -3	447	2.3304	0.00623806	sp|Q9UKT4|FBX5_HUMAN	Q9UKT4	FBX5_HUMAN	FBXO5	F-box only protein 5
0.582967	0.917854	-0.0751766	0.755147	0.827558	0.734928	-0.87377	-1.17369	-1.69582	+	Cluster -3	1339	2.90376	0.00348765	sp|Q9HAW4|CLSPN_HUMAN	Q9HAW4	CLSPN_HUMAN	CLSPN	Claspin
0.576711	0.886515	-0.144067	0.489284	1.15223	0.625068	-0.611198	-1.25759	-1.71695	+	Cluster -3	454	2.25089	0.00698541	sp|Q96JJ7|TMX3_HUMAN	Q96JJ7	TMX3_HUMAN	TMX3	Protein disulfide-isomerase TMX3
0.861857	1.10955	-0.328742	0.419701	0.679416	0.792131	-0.754679	-1.05705	-1.72218	+	Cluster -3	666	1.98356	0.00998561	sp|Q5SNT2|TM201_HUMAN	Q5SNT2	TM201_HUMAN	TMEM201	Transmembrane protein 201
0.764677	0.715859	-0.249104	0.958753	1.04405	0.410892	-0.937201	-1.11119	-1.59674	+	Cluster -3	577	2.5575	0.00445238	sp|P26038|MOES_HUMAN	P26038	MOES_HUMAN	MSN	Moesin
0.604459	0.784238	-0.308997	1.10294	1.1129	0.131415	-0.714341	-0.994085	-1.71853	+	Cluster -3	1580	1.90059	0.0109685	sp|P10071|GLI3_HUMAN	P10071	GLI3_HUMAN	GLI3	Transcriptional activator GLI3
0.594275	1.32842	0.464237	0.208195	0.455934	0.741425	-1.44943	-1.27125	-1.0718	+	Cluster -3	658	3.27452	0.00266015	sp|Q9H089|LSG1_HUMAN	Q9H089	LSG1_HUMAN	LSG1	Large subunit GTPase 1 homolog
0.496196	1.19334	0.462643	0.489892	0.246949	0.903758	-1.63174	-1.09323	-1.06781	+	Cluster -3	252	3.06033	0.00304412	sp|Q96FF9|CDCA5_HUMAN	Q96FF9	CDCA5_HUMAN	CDCA5	Sororin
0.588654	1.23787	0.308804	0.11862	0.414642	0.967041	-1.72351	-1.18635	-0.72577	+	Cluster -3	386	2.3437	0.00610624	sp|P31483|TIA1_HUMAN	P31483	TIA1_HUMAN	TIA1	Nucleolysin TIA-1 isoform p40
0.87939	1.11691	0.244865	0.709109	0.0655404	0.740916	-1.4572	-1.36862	-0.930908	+	Cluster -3	1512	2.91223	0.00348044	sp|Q14004|CDK13_HUMAN	Q14004	CDK13_HUMAN	CDK13	Cyclin-dependent kinase 13
1.01955	0.987879	0.320455	0.310402	0.256171	0.894083	-1.35157	-1.4679	-0.969072	+	Cluster -3	249	3.17745	0.00300213	sp|Q9BRU9|UTP23_HUMAN	Q9BRU9	UTP23_HUMAN	UTP23	rRNA-processing protein UTP23 homolog
0.791822	1.40647	0.0443929	0.448451	0.465271	0.511931	-1.53253	-1.27252	-0.863291	+	Cluster -3	473	2.51547	0.00475829	sp|Q9NQ55|SSF1_HUMAN	Q9NQ55	SSF1_HUMAN	PPAN	Suppressor of SWI4 1 homolog
0.792021	1.23046	0.2769	0.48821	0.309792	0.646758	-1.601	-1.36283	-0.78032	+	Cluster -3	864	2.89225	0.00343988	sp|P11171|EPB41_HUMAN	P11171	EPB41_HUMAN	EPB41	Protein 4.1
0.682475	1.1138	-0.0529259	0.282601	0.0894166	1.4083	-1.35188	-1.21593	-0.955861	+	Cluster -3	360	1.9495	0.0105072	sp|Q96HE9|PRR11_HUMAN	Q96HE9	PRR11_HUMAN	PRR11	Proline-rich protein 11
0.658787	0.786189	0.238394	0.372297	0.649679	1.14654	-1.49889	-1.15575	-1.19725	+	Cluster -3	626	3.50667	0.00297368	sp|Q9H967|WDR76_HUMAN	Q9H967	WDR76_HUMAN	WDR76	WD repeat-containing protein 76
0.488074	0.79522	-0.00524663	0.48732	0.368202	1.50002	-1.4434	-0.984699	-1.20549	+	Cluster -3	566	2.46631	0.00499912	sp|O75419|CDC45_HUMAN	O75419	CDC45_HUMAN	CDC45	Cell division control protein 45 homolog
0.277244	1.52437	-0.365634	0.491583	0.992512	0.495556	-1.36895	-1.13502	-0.911669	+	Cluster -3	568	1.73183	0.0143261	sp|Q9BRS2|RIOK1_HUMAN	Q9BRS2	RIOK1_HUMAN	RIOK1	Serine/threonine-protein kinase RIO1
0.421609	1.4205	-0.214982	0.138092	0.71496	0.998774	-1.42431	-1.24064	-0.814009	+	Cluster -3	394	1.84584	0.0118118	sp|Q9UIA0|CYH4_HUMAN	Q9UIA0	CYH4_HUMAN	CYTH4	Cytohesin-4
0.0184479	1.2897	0.00709009	0.212948	0.9788	1.0198	-1.28319	-1.3762	-0.867406	+	Cluster -3	863	2.05921	0.0092261	sp|Q13444|ADA15_HUMAN	Q13444	ADA15_HUMAN	ADAM15	Disintegrin and metalloproteinase domain-containing protein 15
0.43388	1.14886	-0.470415	0.596646	0.939839	0.88485	-1.25943	-0.942063	-1.33217	+	Cluster -3	1025	2.20641	0.0072893	sp|Q9UIQ6|LCAP_HUMAN	Q9UIQ6	LCAP_HUMAN	LNPEP	Leucyl-cystinyl aminopeptidase
0.33604	0.992104	-0.208737	0.668232	0.814548	1.08229	-1.3989	-1.20998	-1.07559	+	Cluster -3	707	2.89971	0.00347158	sp|P23246|SFPQ_HUMAN	P23246	SFPQ_HUMAN	SFPQ	Splicing factor, proline- and glutamine-rich
0.414114	1.42466	0.0603403	0.586916	0.522975	0.683489	-1.54232	-0.97582	-1.17435	+	Cluster -3	335	2.49265	0.00499354	sp|Q03405|UPAR_HUMAN	Q03405	UPAR_HUMAN	PLAUR	Urokinase plasminogen activator surface receptor
0.280921	1.5114	0.24016	0.497389	0.437921	0.714373	-1.16351	-1.0313	-1.48736	+	Cluster -3	734	2.47564	0.00497122	sp|Q6SJ93|F111B_HUMAN	Q6SJ93	F111B_HUMAN	FAM111B	Serine protease FAM111B
0.428595	1.57482	-0.225454	0.586708	0.305695	0.807861	-1.16975	-0.869387	-1.43908	+	Cluster -3	579	1.83918	0.0119165	sp|O60508|PRP17_HUMAN	O60508	PRP17_HUMAN	CDC40	Pre-mRNA-processing factor 17
0.411644	0.58758	0.345306	0.310797	1.10161	1.04985	-1.52074	-1.02455	-1.26149	+	Cluster -3	707	3.49779	0.00291613	sp|Q9H6R0|DHX33_HUMAN	Q9H6R0	DHX33_HUMAN	DHX33	ATP-dependent RNA helicase DHX33
0.660355	0.255929	0.0205554	0.641842	1.31617	0.828528	-1.36566	-1.07196	-1.28575	+	Cluster -3	1390	3.61756	0.00244615	sp|Q6PL18|ATAD2_HUMAN	Q6PL18	ATAD2_HUMAN	ATAD2	ATPase family AAA domain-containing protein 2
0.835185	0.507441	0.0608962	0.673557	0.97386	0.800236	-1.47124	-1.22318	-1.15675	+	Cluster -3	116	3.8949	0.00191111	sp|Q96HQ2|C2AIL_HUMAN	Q96HQ2	C2AIL_HUMAN	CDKN2AIPNL	CDKN2AIP N-terminal-like protein
0.578523	0.341574	0.301575	0.615491	1.05501	0.932714	-1.65625	-1.10882	-1.05982	+	Cluster -3	261	4.01525	0.00207692	sp|Q969G5|CAVN3_HUMAN	Q969G5	CAVN3_HUMAN	CAVIN3	Caveolae-associated protein 3
0.898273	0.567097	-0.03993	0.609287	0.979917	0.712571	-1.54981	-1.44803	-0.729376	+	Cluster -3	306	2.80952	0.00396084	sp|Q9BY42|RTF2_HUMAN	Q9BY42	RTF2_HUMAN	RTF2	Replication termination factor 2
0.598479	0.643164	-0.165769	0.786231	1.02478	0.781966	-1.73333	-1.11496	-0.820558	+	Cluster -3	494	2.86671	0.0035096	sp|Q08170|SRSF4_HUMAN	Q08170	SRSF4_HUMAN	SRSF4	Serine/arginine-rich splicing factor 4
0.571827	1.03038	0.15946	0.88744	0.596213	0.551284	-1.63262	-1.33901	-0.82498	+	Cluster -3	453	3.03223	0.00295187	sp|P36957|ODO2_HUMAN	P36957	ODO2_HUMAN	DLST	Dihydrolipoyllysine-residue succinyltransferase component of 2-oxoglutarate dehydrogenase complex, mitochondrial
-0.280706	1.16633	-0.38497	0.926483	1.01581	0.749484	-1.51536	-1.19777	-0.479308	+	Cluster -3	257	1.74013	0.0142019	sp|Q9UMY1|NOL7_HUMAN	Q9UMY1	NOL7_HUMAN	NOL7	Nucleolar protein 7
0.210345	0.774012	-0.0668619	0.502326	1.27489	0.856875	-1.38312	-1.57216	-0.596304	+	Cluster -3	255	2.46955	0.00496539	sp|Q96BD8|SKA1_HUMAN	Q96BD8	SKA1_HUMAN	SKA1	Spindle and kinetochore-associated protein 1
0.162606	0.697875	-0.249254	0.828443	1.17824	0.894385	-1.56767	-1.28976	-0.654871	+	Cluster -3	452	2.76518	0.00408983	sp|O43615|TIM44_HUMAN	O43615	TIM44_HUMAN	TIMM44	Mitochondrial import inner membrane translocase subunit TIM44
0.835694	1.06993	-0.0189374	0.877064	-0.0657438	0.889682	-0.861835	-1.10455	-1.6213	+	Cluster -3	184	2.13115	0.00835006	sp|Q9NV31|IMP3_HUMAN	Q9NV31	IMP3_HUMAN	IMP3	U3 small nucleolar ribonucleoprotein protein IMP3
0.891964	0.584167	0.425595	1.08485	0.0503928	0.776895	-1.09205	-1.32702	-1.3948	+	Cluster -3	338	3.12431	0.00296414	sp|Q01664|TFAP4_HUMAN	Q01664	TFAP4_HUMAN	TFAP4	Transcription factor AP-4
0.801976	1.03448	0.28183	0.980255	0.213071	0.458559	-1.12158	-0.988726	-1.65987	+	Cluster -3	520	2.91086	0.00346958	sp|Q9Y6I4|UBP3_HUMAN	Q9Y6I4	UBP3_HUMAN	USP3	Ubiquitin carboxyl-terminal hydrolase 3
0.774949	1.02427	0.473935	1.05342	-0.0992917	0.515411	-1.05071	-1.265	-1.42699	+	Cluster -3	652	2.86332	0.00361347	sp|Q86VX9|MON1A_HUMAN	Q86VX9	MON1A_HUMAN	MON1A	Vacuolar fusion protein MON1 homolog A
1.0555	0.584351	0.389636	0.684792	0.132024	0.874725	-0.740074	-1.21627	-1.76468	+	Cluster -3	227	2.63588	0.00440934	sp|Q9H8U3|ZFAN3_HUMAN	Q9H8U3	ZFAN3_HUMAN	ZFAND3	AN1-type zinc finger protein 3
1.38175	0.547517	0.146926	0.847304	0.0115063	0.55599	-0.623086	-1.08644	-1.78147	+	Cluster -3	570	1.91938	0.0107869	sp|Q96JP5|ZFP91_HUMAN	Q96JP5	ZFP91_HUMAN	ZFP91	E3 ubiquitin-protein ligase ZFP91
1.21348	0.760932	0.48713	0.820993	-0.00659694	0.391018	-0.732172	-1.32308	-1.6117	+	Cluster -3	1368	2.69147	0.00428019	sp|Q9ULK4|MED23_HUMAN	Q9ULK4	MED23_HUMAN	MED23	Mediator of RNA polymerase II transcription subunit 23
1.30893	0.411905	0.40698	1.05435	-0.166331	0.529712	-0.736243	-1.25742	-1.55188	+	Cluster -3	462	2.07229	0.00899487	sp|Q96EZ8|MCRS1_HUMAN	Q96EZ8	MCRS1_HUMAN	MCRS1	Microspherule protein 1
1.18859	0.27911	0.298474	1.0119	0.731437	0.182785	-0.904313	-1.1453	-1.64269	+	Cluster -3	727	2.4945	0.00500741	sp|P49711|CTCF_HUMAN	P49711	CTCF_HUMAN	CTCF	Transcriptional repressor CTCF
1.06446	0.202822	0.415435	1.04733	0.411567	0.517678	-0.653394	-1.20772	-1.79817	+	Cluster -3	166	2.37708	0.00594872	sp|P55273|CDN2D_HUMAN	P55273	CDN2D_HUMAN	CDKN2D	Cyclin-dependent kinase 4 inhibitor D
1.14073	0.207646	0.354714	0.860488	0.502964	0.661908	-0.889352	-1.04734	-1.79176	+	Cluster -3	467	2.66821	0.00431702	sp|O94810|RGS11_HUMAN	O94810	RGS11_HUMAN	RGS11	Regulator of G-protein signaling 11
1.02678	0.502899	0.237595	1.06126	0.379596	0.590597	-0.920713	-1.32065	-1.55736	+	Cluster -3	838	3.04437	0.00298917	sp|Q658Y4|F91A1_HUMAN	Q658Y4	F91A1_HUMAN	FAM91A1	Protein FAM91A1
1.26966	0.321421	0.329064	1.03534	0.266153	0.503504	-1.06443	-1.09868	-1.56204	+	Cluster -3	121	2.63406	0.00438981	sp|Q8WVK7|SKA2_HUMAN	Q8WVK7	SKA2_HUMAN	SKA2	Spindle and kinetochore-associated protein 2
1.52257	0.293129	0.0785319	0.945593	0.339685	0.214486	-0.698255	-0.893413	-1.80233	+	Cluster -3	395	1.67347	0.0156842	sp|P31153|METK2_HUMAN	P31153	METK2_HUMAN	MAT2A	S-adenosylmethionine synthase isoform type-2
1.51209	0.161578	0.161424	0.89131	0.131694	0.612306	-1.1332	-0.689363	-1.64783	+	Cluster -3	1058	1.82487	0.0122337	sp|O95696|BRD1_HUMAN	O95696	BRD1_HUMAN	BRD1	Bromodomain-containing protein 1
0.920346	-0.00208244	0.845925	1.06537	0.0656512	0.776264	-0.924071	-1.55731	-1.1901	+	Cluster -3	252	2.41156	0.00568474	sp|Q9BXK1|KLF16_HUMAN	Q9BXK1	KLF16_HUMAN	KLF16	Krueppel-like factor 16
1.06078	0.180114	0.738192	0.762551	-0.0565845	0.984182	-0.832379	-1.30155	-1.53531	+	Cluster -3	1427	2.41394	0.00560067	sp|Q14207|NPAT_HUMAN	Q14207	NPAT_HUMAN	NPAT	Protein NPAT
0.937004	-0.120125	0.322018	1.5354	-0.0535215	0.73819	-0.721743	-1.09467	-1.54254	+	Cluster -3	1499	1.70358	0.0150595	sp|Q86UU0|BCL9L_HUMAN	Q86UU0	BCL9L_HUMAN	BCL9L	B-cell CLL/lymphoma 9-like protein
0.579501	0.155507	0.378842	1.44434	0.292139	0.684752	-0.511277	-1.40454	-1.61926	+	Cluster -3	227	2.21021	0.00726671	sp|O75391|SPAG7_HUMAN	O75391	SPAG7_HUMAN	SPAG7	Sperm-associated antigen 7
0.376158	0.815638	0.497381	0.745672	0.227229	0.800671	-0.812295	-0.452058	-2.1984	+	Cluster -3	1118	1.8039	0.0127912	sp|Q9NZB2|F120A_HUMAN	Q9NZB2	F120A_HUMAN	FAM120A	Constitutive coactivator of PPAR-gamma-like protein 1
0.678681	0.700308	0.362619	0.91006	0.223265	0.586277	-1.02652	-0.301353	-2.13334	+	Cluster -3	970	1.79973	0.0128178	sp|Q96H55|MYO19_HUMAN	Q96H55	MYO19_HUMAN	MYO19	Unconventional myosin-XIX
0.442466	0.38391	0.715723	1.0564	0.14126	0.782283	-0.856525	-0.587584	-2.07793	+	Cluster -3	1830	1.96854	0.0101464	sp|Q92608|DOCK2_HUMAN	Q92608	DOCK2_HUMAN	DOCK2	Dedicator of cytokinesis protein 2
0.673667	0.361833	-0.0354866	1.00505	0.448343	1.06982	-1.00402	-0.597374	-1.92183	+	Cluster -3	230	2.26462	0.00689266	sp|Q9BWG6|SCNM1_HUMAN	Q9BWG6	SCNM1_HUMAN	SCNM1	Sodium channel modifier 1
1.18655	0.302591	0.671064	0.57465	0.592287	0.331583	-1.55733	-0.491222	-1.61017	+	Cluster -3	532	2.43544	0.00524658	sp|P31513|FMO3_HUMAN	P31513	FMO3_HUMAN	FMO3	Dimethylaniline monooxygenase [N-oxide-forming] 3
0.938055	0.216596	0.627257	0.609111	0.782911	0.513466	-1.53233	-0.46033	-1.69474	+	Cluster -3	1129	2.47281	0.00495357	sp|Q92900|RENT1_HUMAN	Q92900	RENT1_HUMAN	UPF1	Regulator of nonsense transcripts 1
0.893145	0.430616	0.773736	0.536809	0.892486	0.274583	-1.36923	-0.754746	-1.6774	+	Cluster -3	2627	3.08591	0.00304762	sp|Q99973|TEP1_HUMAN	Q99973	TEP1_HUMAN	TEP1	Telomerase protein component 1
0.776715	-0.105575	1.00483	0.516072	0.673927	0.715337	-1.62885	-0.435649	-1.51682	+	Cluster -3	234	2.11467	0.00859028	sp|Q9NXV2|KCTD5_HUMAN	Q9NXV2	KCTD5_HUMAN	KCTD5	BTB/POZ domain-containing protein KCTD5
0.717282	0.121053	0.899994	1.10691	0.586745	0.160942	-0.67764	-1.03527	-1.88002	+	Cluster -3	825	2.14401	0.00819814	sp|O75815|BCAR3_HUMAN	O75815	BCAR3_HUMAN	BCAR3	Breast cancer anti-estrogen resistance protein 3
0.78861	0.0789613	0.722924	0.608671	0.909155	0.556092	-0.811289	-0.87221	-1.98091	+	Cluster -3	241	2.42158	0.00556624	sp|Q9BXL8|CDCA4_HUMAN	Q9BXL8	CDCA4_HUMAN	CDCA4	Cell division cycle-associated protein 4
0.933064	0.133523	0.830739	0.746844	0.470502	0.425165	-0.95177	-0.517307	-2.07076	+	Cluster -3	246	1.99969	0.00972865	sp|O75586|MED6_HUMAN	O75586	MED6_HUMAN	MED6	Mediator of RNA polymerase II transcription subunit 6
0.268206	0.0360495	0.90864	1.24318	0.579643	0.645867	-1.09617	-0.933011	-1.6524	+	Cluster -3	613	2.76226	0.00406833	sp|Q6NYC8|PPR18_HUMAN	Q6NYC8	PPR18_HUMAN	PPP1R18	Phostensin
0.553072	0.255107	0.554849	1.35209	0.450725	0.61443	-1.17671	-1.03871	-1.56485	+	Cluster -3	2723	3.23198	0.0029633	sp|O60281|ZN292_HUMAN	O60281	ZN292_HUMAN	ZNF292	Zinc finger protein 292
0.551328	0.295995	0.494559	1.00211	1.01417	0.371096	-1.33187	-0.676313	-1.72107	+	Cluster -3	339	2.8995	0.00346626	sp|Q9Y394|DHRS7_HUMAN	Q9Y394	DHRS7_HUMAN	DHRS7	Dehydrogenase/reductase SDR family member 7
0.575105	0.270096	0.584404	0.965652	0.724435	0.671207	-1.46968	-0.664135	-1.65709	+	Cluster -3	585	3.23131	0.00295652	sp|Q9NRC1|ST7_HUMAN	Q9NRC1	ST7_HUMAN	ST7	Suppressor of tumorigenicity 7 protein
0.648227	0.391613	0.536711	1.0507	0.544673	0.656059	-1.1824	-0.870197	-1.77539	+	Cluster -3	1327	3.38058	0.00290503	sp|Q9H582|ZN644_HUMAN	Q9H582	ZN644_HUMAN	ZNF644	Zinc finger protein 644
0.487794	0.316373	0.359247	1.36319	0.688183	0.379579	-1.05749	-0.668124	-1.86876	+	Cluster -3	1541	2.39533	0.00581848	sp|Q8IXJ9|ASXL1_HUMAN	Q8IXJ9	ASXL1_HUMAN	ASXL1	Polycomb group protein ASXL1
0.589661	0.566241	0.692385	0.937897	0.850004	0.144633	-1.4127	-0.720661	-1.64746	+	Cluster -3	377	2.91869	0.00345197	sp|Q8N4Q0|PTGR3_HUMAN	Q8N4Q0	PTGR3_HUMAN	ZADH2	Prostaglandin reductase 3
0.688912	0.764498	0.573326	0.982152	0.653669	0.0469308	-1.34255	-0.62917	-1.73777	+	Cluster -3	340	2.58494	0.00444075	sp|O14681|EI24_HUMAN	O14681	EI24_HUMAN	EI24	Etoposide-induced protein 2.4 homolog
0.28725	0.534037	1.11675	1.00658	0.340151	0.410762	-0.841362	-1.0356	-1.81857	+	Cluster -3	186	2.50905	0.00481586	sp|O75414|NDK6_HUMAN	O75414	NDK6_HUMAN	NME6	Nucleoside diphosphate kinase 6
0.491498	0.66817	0.836306	0.818828	0.766879	0.251446	-1.00074	-1.04331	-1.78907	+	Cluster -3	611	3.27181	0.0026472	sp|Q494U1|PKHN1_HUMAN	Q494U1	PKHN1_HUMAN	PLEKHN1	Pleckstrin homology domain-containing family N member 1
0.694236	0.743873	0.566695	0.812767	0.678099	0.280336	-0.806853	-1.04549	-1.92367	+	Cluster -3	656	2.90307	0.00348228	sp|Q01844|EWS_HUMAN	Q01844	EWS_HUMAN	EWSR1	RNA-binding protein EWS
0.355963	0.90624	0.783183	0.694003	0.4101	0.691718	-1.10906	-0.948924	-1.78322	+	Cluster -3	357	3.34862	0.00280323	sp|O00303|EIF3F_HUMAN	O00303	EIF3F_HUMAN	EIF3F	Eukaryotic translation initiation factor 3 subunit F
0.752095	1.35776	0.566803	0.516754	0.0510282	0.141062	-0.664965	-0.713288	-2.00725	+	Cluster -3	440	2.07768	0.00887076	sp|Q9BQQ3|GORS1_HUMAN	Q9BQQ3	GORS1_HUMAN	GORASP1	Golgi reassembly-stacking protein 1
0.829463	1.21808	0.892963	0.651019	-0.231769	0.191976	-1.10495	-0.834661	-1.61212	+	Cluster -3	400	3.01911	0.00295622	sp|Q9NRC8|SIR7_HUMAN	Q9NRC8	SIR7_HUMAN	SIRT7	NAD-dependent protein deacetylase sirtuin-7
1.04722	1.27763	0.717012	0.393088	-0.0974023	0.249689	-1.0715	-0.927754	-1.58798	+	Cluster -3	377	3.54355	0.00286111	sp|O75381|PEX14_HUMAN	O75381	PEX14_HUMAN	PEX14	Peroxisomal membrane protein PEX14
1.15759	1.00729	1.20618	0.0975843	-0.24259	0.119179	-1.17191	-0.654882	-1.51844	+	Cluster -3	457	3.6613	0.00213992	sp|Q9Y697|NFS1_HUMAN	Q9Y697	NFS1_HUMAN	NFS1	Cysteine desulfurase, mitochondrial
1.18747	0.919382	0.965588	0.200725	0.0887148	0.24387	-1.54843	-0.719846	-1.33748	+	Cluster -3	4544	3.82488	0.00173737	sp|Q07954|LRP1_HUMAN	Q07954	LRP1_HUMAN	LRP1	Prolow-density lipoprotein receptor-related protein 1
0.962396	1.07165	0.864545	0.20895	0.192426	0.369698	-1.44699	-0.666015	-1.55666	+	Cluster -3	612	3.58049	0.00227957	sp|Q9UKG9|OCTC_HUMAN	Q9UKG9	OCTC_HUMAN	CROT	Peroxisomal carnitine O-octanoyltransferase
1.11207	0.806664	0.641731	0.395132	0.425202	0.175322	-1.12434	-0.470173	-1.96161	+	Cluster -3	461	2.39899	0.00576828	sp|P31146|COR1A_HUMAN	P31146	COR1A_HUMAN	CORO1A	Coronin-1A
0.665819	1.01213	0.978577	0.24305	0.491664	0.40522	-1.42437	-0.820379	-1.55171	+	Cluster -3	902	3.87058	0.00184946	sp|Q96PV7|F193B_HUMAN	Q96PV7	F193B_HUMAN	FAM193B	Protein FAM193B
0.51078	1.13225	0.864873	0.422754	0.46137	0.26396	-1.16119	-0.619912	-1.87488	+	Cluster -3	807	2.698	0.00425428	sp|O94886|CSCL1_HUMAN	O94886	CSCL1_HUMAN	TMEM63A	CSC1-like protein 1
1.29282	0.437938	1.09825	0.10663	0.524327	0.0357037	-0.82604	-0.889136	-1.7805	+	Cluster -3	247	2.57233	0.00445306	sp|Q96MF7|NSE2_HUMAN	Q96MF7	NSE2_HUMAN	NSMCE2	E3 SUMO-protein ligase NSE2
1.40396	0.533624	0.913029	0.247317	0.480895	0.00510844	-1.22447	-0.770341	-1.58913	+	Cluster -3	117	2.95117	0.00319737	sp|Q9NR33|DPOE4_HUMAN	Q9NR33	DPOE4_HUMAN	POLE4	DNA polymerase epsilon subunit 4
1.3989	0.67122	0.864858	0.198342	0.49969	-0.0196984	-1.0807	-0.966145	-1.56646	+	Cluster -3	325	3.32526	0.00272251	sp|Q9H6V9|LDAH_HUMAN	Q9H6V9	LDAH_HUMAN	LDAH	Lipid droplet-associated hydrolase
1.57576	0.499082	0.796028	0.0111288	0.523655	0.0151767	-1.04927	-0.713258	-1.6583	+	Cluster -3	467	2.4173	0.00562888	sp|Q8IV32|CCD71_HUMAN	Q8IV32	CCD71_HUMAN	CCDC71	Coiled-coil domain-containing protein 71
1.03282	0.925369	0.784902	0.0696843	0.747542	0.179371	-1.0979	-1.02924	-1.61255	+	Cluster -3	956	3.61504	0.00242748	sp|Q9H4I2|ZHX3_HUMAN	Q9H4I2	ZHX3_HUMAN	ZHX3	Zinc fingers and homeoboxes protein 3
1.2508	1.02432	0.748484	0.132885	0.346337	0.148374	-0.853315	-1.28895	-1.50893	+	Cluster -3	3177	3.9783	0.00198773	sp|P12111|CO6A3_HUMAN	P12111	CO6A3_HUMAN	COL6A3	Collagen alpha-3(VI) chain
1.38752	1.02432	0.714392	0.0258233	0.3169	-0.0538888	-0.64692	-1.09999	-1.66816	+	Cluster -3	590	2.95694	0.00322388	sp|Q8IXH7|NELFD_HUMAN	Q8IXH7	NELFD_HUMAN	NELFCD	Negative elongation factor C/D
1.29873	1.12801	0.517023	0.0510925	0.371352	0.0624352	-0.76242	-0.836367	-1.82986	+	Cluster -3	349	2.56801	0.00445382	sp|Q6IBS0|TWF2_HUMAN	Q6IBS0	TWF2_HUMAN	TWF2	Twinfilin-2
1.48995	0.808822	0.709783	0.487667	0.154732	-0.175981	-1.17038	-0.762427	-1.54216	+	Cluster -3	341	2.86811	0.00351479	sp|Q8ND76|CCNY_HUMAN	Q8ND76	CCNY_HUMAN	CCNY	Cyclin-Y
1.60381	0.610314	0.558676	0.621633	0.332886	-0.232171	-1.0748	-0.977985	-1.44236	+	Cluster -3	877	2.48126	0.00498277	sp|Q9Y2X0|MED16_HUMAN	Q9Y2X0	MED16_HUMAN	MED16	Mediator of RNA polymerase II transcription subunit 16
1.74125	0.468827	0.373931	0.606908	0.0658701	0.251759	-1.20716	-0.967745	-1.33364	+	Cluster -3	1195	2.28391	0.00669634	sp|Q8NAP3|ZBT38_HUMAN	Q8NAP3	ZBT38_HUMAN	ZBTB38	Zinc finger and BTB domain-containing protein 38
1.45424	0.734922	0.609846	0.607128	0.0249511	0.191521	-1.25547	-0.875849	-1.49129	+	Cluster -3	1091	3.01972	0.0029614	sp|Q96SB8|SMC6_HUMAN	Q96SB8	SMC6_HUMAN	SMC6	Structural maintenance of chromosomes protein 6
1.70753	0.282196	0.811762	0.383743	0.000341908	0.287262	-1.34728	-0.918214	-1.20734	+	Cluster -3	432	2.45721	0.00504014	sp|Q96I99|SUCB2_HUMAN	Q96I99	SUCB2_HUMAN	SUCLG2	Succinate--CoA ligase [GDP-forming] subunit beta, mitochondrial
1.4538	0.470564	0.669125	0.365519	0.200668	0.571438	-1.43569	-1.04475	-1.25067	+	Cluster -3	304	3.20004	0.00309451	sp|Q8IWE4|DCNL3_HUMAN	Q8IWE4	DCNL3_HUMAN	DCUN1D3	DCN1-like protein 3
1.33417	0.5708	0.788517	0.440292	0.425914	0.218614	-1.18792	-1.09129	-1.4991	+	Cluster -3	6885	3.80616	0.00170297	sp|Q8WXH0|SYNE2_HUMAN	Q8WXH0	SYNE2_HUMAN	SYNE2	Nesprin-2
1.31452	0.609814	0.807113	0.44956	0.365102	0.245682	-1.40044	-1.06833	-1.32302	+	Cluster -3	426	4.09314	0.00132374	sp|Q6PI47|KCD18_HUMAN	Q6PI47	KCD18_HUMAN	KCTD18	BTB/POZ domain-containing protein KCTD18
1.91799	0.464098	0.542953	0.509064	-0.224352	-0.113527	-1.06553	-0.63353	-1.39716	+	Cluster -3	486	1.84402	0.011837	sp|P51608|MECP2_HUMAN	P51608	MECP2_HUMAN	MECP2	Methyl-CpG-binding protein 2
1.6982	0.722838	0.812952	0.155986	-0.11904	-0.236144	-1.13199	-0.340377	-1.56243	+	Cluster -3	879	2.24277	0.00706722	sp|P23497|SP100_HUMAN	P23497	SP100_HUMAN	SP100	Nuclear autoantigen Sp-100
1.6954	0.701878	0.824993	0.264764	-0.0150219	-0.20738	-1.1524	-0.681764	-1.43047	+	Cluster -3	852	2.7279	0.00410114	sp|O60341|KDM1A_HUMAN	O60341	KDM1A_HUMAN	KDM1A	Lysine-specific histone demethylase 1A
0.907246	1.19076	0.518131	0.666941	0.689939	-0.337917	-1.35839	-1.04189	-1.23482	+	Cluster -3	611	2.75181	0.00410966	sp|Q6H8Q1|ABLM2_HUMAN	Q6H8Q1	ABLM2_HUMAN	ABLIM2	Actin-binding LIM protein 2
1.12909	1.15225	0.438207	0.453232	0.708672	-0.27472	-1.16884	-1.01338	-1.42451	+	Cluster -3	279	2.79521	0.00397802	sp|Q9BW60|ELOV1_HUMAN	Q9BW60	ELOV1_HUMAN	ELOVL1	Elongation of very long chain fatty acids protein 1
0.993185	1.1127	0.761897	0.806692	0.17483	-0.361099	-1.14572	-0.766905	-1.57558	+	Cluster -3	365	2.61573	0.00446421	sp|Q8IWS0|PHF6_HUMAN	Q8IWS0	PHF6_HUMAN	PHF6	PHD finger protein 6
0.600408	0.8702	0.998745	0.85225	0.778442	-0.534198	-1.11841	-1.32689	-1.12055	+	Cluster -3	258	2.33943	0.00616067	sp|Q99865|SPI2A_HUMAN	Q99865	SPI2A_HUMAN	SPIN2A	Spindlin-2A
0.88103	1.04058	0.566964	1.18191	-0.0377764	-0.0478507	-0.963023	-1.47598	-1.14585	+	Cluster -3	203	2.41716	0.00562416	sp|Q9Y3E1|HDGR3_HUMAN	Q9Y3E1	HDGR3_HUMAN	HDGFL3	Hepatoma-derived growth factor-related protein 3
0.745385	1.15628	1.00561	0.697376	0.164775	-0.139059	-0.907558	-1.48957	-1.23324	+	Cluster -3	1361	3.34239	0.0027882	sp|Q6ZSZ5|ARHGI_HUMAN	Q6ZSZ5	ARHGI_HUMAN	ARHGEF18	Rho guanine nucleotide exchange factor 18
0.506005	1.08263	0.906208	0.677345	0.427676	0.27363	-1.24371	-1.43608	-1.19371	+	Cluster -3	61	4.32045	0.00023301	sp|P04732|MT1E_HUMAN	P04732	MT1E_HUMAN	MT1E	Metallothionein-1E
0.485228	1.25422	0.805657	0.770246	0.377155	0.0526556	-1.41965	-0.956979	-1.36853	+	Cluster -3	393	3.20153	0.00311504	sp|Q9NQR1|KMT5A_HUMAN	Q9NQR1	KMT5A_HUMAN	KMT5A	N-lysine methyltransferase KMT5A
1.1161	0.783307	0.664436	0.995667	0.311257	-0.188057	-1.41612	-1.16147	-1.10511	+	Cluster -3	413	2.88944	0.00348328	sp|Q16254|E2F4_HUMAN	Q16254	E2F4_HUMAN	E2F4	Transcription factor E2F4
0.846915	0.744305	0.754683	0.850459	0.572986	0.0562506	-1.48298	-1.45529	-0.887334	+	Cluster -3	664	3.47089	0.00283386	sp|Q2TB10|ZN800_HUMAN	Q2TB10	ZN800_HUMAN	ZNF800	Zinc finger protein 800
0.790055	1.06648	0.684053	0.71507	0.589317	-0.0436582	-1.32529	-1.44807	-1.02796	+	Cluster -3	710	3.60715	0.00236431	sp|P48147|PPCE_HUMAN	P48147	PPCE_HUMAN	PREP	Prolyl endopeptidase
1.19678	0.543012	0.18266	0.931428	0.267	0.658188	-1.45494	-1.31987	-1.00425	+	Cluster -3	664	2.90788	0.00346417	sp|Q8N5G2|MACOI_HUMAN	Q8N5G2	MACOI_HUMAN	MACO1	Macoilin
1.01959	0.842878	0.159008	1.11031	0.391792	0.199031	-1.49191	-1.3215	-0.909195	+	Cluster -3	510	2.64077	0.00440625	sp|Q8N2W9|PIAS4_HUMAN	Q8N2W9	PIAS4_HUMAN	PIAS4	E3 SUMO-protein ligase PIAS4
1.37255	0.578619	-0.196032	0.902752	0.540858	0.438133	-1.0609	-1.29526	-1.28072	+	Cluster -3	3114	2.28596	0.00669647	sp|P49454|CENPF_HUMAN	P49454	CENPF_HUMAN	CENPF	Centromere protein F
1.27839	0.62719	0.0229097	0.726248	0.788864	0.318688	-1.26834	-1.21591	-1.27804	+	Cluster -3	1516	2.81637	0.00397753	sp|Q9NYU1|UGGG2_HUMAN	Q9NYU1	UGGG2_HUMAN	UGGT2	UDP-glucose:glycoprotein glucosyltransferase 2
0.982185	0.625097	0.134797	0.85472	0.791771	0.490222	-1.21689	-1.38069	-1.28121	+	Cluster -3	457	3.74521	0.00168142	sp|Q13451|FKBP5_HUMAN	Q13451	FKBP5_HUMAN	FKBP5	Peptidyl-prolyl cis-trans isomerase FKBP5
0.994634	0.559016	0.0625181	1.05112	0.695907	0.411782	-1.13706	-1.60477	-1.03314	+	Cluster -3	282	2.95881	0.00323461	sp|P82970|HMGN5_HUMAN	P82970	HMGN5_HUMAN	HMGN5	High mobility group nucleosome-binding domain-containing protein 5
1.40153	0.510972	-0.118262	0.724995	0.664362	0.354547	-0.967357	-1.74783	-0.822954	+	Cluster -3	158	1.98736	0.00994935	sp|P63279|UBC9_HUMAN	P63279	UBC9_HUMAN	UBE2I	SUMO-conjugating enzyme UBC9
1.21884	0.51625	-0.130323	0.525029	1.07825	0.449507	-0.985353	-1.4932	-1.179	+	Cluster -3	3907	2.38997	0.00590739	sp|Q99996|AKAP9_HUMAN	Q99996	AKAP9_HUMAN	AKAP9	A-kinase anchor protein 9
1.41194	0.432451	-0.106106	0.620861	0.784425	0.525325	-1.21039	-1.378	-1.0805	+	Cluster -3	436	2.40459	0.00573124	sp|Q8IYS1|P20D2_HUMAN	Q8IYS1	P20D2_HUMAN	PM20D2	Peptidase M20 domain-containing protein 2
1.30832	0.483056	0.0326375	0.521791	0.787944	0.603373	-1.23517	-1.51666	-0.985287	+	Cluster -3	277	2.68906	0.0042545	sp|P29218|IMPA1_HUMAN	P29218	IMPA1_HUMAN	IMPA1	Inositol monophosphatase 1
1.16622	0.527654	0.528037	0.771993	0.529076	0.352665	-1.44452	-1.07307	-1.35805	+	Cluster -3	346	3.79113	0.00162264	sp|O75525|KHDR3_HUMAN	O75525	KHDR3_HUMAN	KHDRBS3	KH domain-containing, RNA-binding, signal transduction-associated protein 3
1.02443	0.8264	0.380376	0.77178	0.445171	0.448589	-1.36073	-1.09398	-1.44203	+	Cluster -3	903	4.06102	0.0012349	sp|Q92667|AKAP1_HUMAN	Q92667	AKAP1_HUMAN	AKAP1	A-kinase anchor protein 1, mitochondrial
1.23393	0.418009	0.328861	0.757984	0.532802	0.585515	-1.17617	-1.25047	-1.43046	+	Cluster -3	665	3.46575	0.00290683	sp|Q96S55|WRIP1_HUMAN	Q96S55	WRIP1_HUMAN	WRNIP1	ATPase WRNIP1
1.32179	0.383232	0.274401	0.699146	0.502215	0.629388	-1.23943	-1.12252	-1.44821	+	Cluster -3	202	3.10575	0.00303314	sp|Q9BQE9|BCL7B_HUMAN	Q9BQE9	BCL7B_HUMAN	BCL7B	B-cell CLL/lymphoma 7 protein family member B
1.37921	0.577254	0.142113	0.868381	0.371629	0.384544	-1.42419	-1.02023	-1.27871	+	Cluster -3	351	2.66862	0.0043271	sp|Q8NE86|MCU_HUMAN	Q8NE86	MCU_HUMAN	MCU	Calcium uniporter protein, mitochondrial
1.35333	0.606973	0.407603	0.679765	0.641404	0.05901	-1.02837	-1.33756	-1.38216	+	Cluster -3	390	2.97849	0.00313605	sp|Q6NZI2|CAVN1_HUMAN	Q6NZI2	CAVN1_HUMAN	CAVIN1	Caveolae-associated protein 1
1.31994	0.812086	0.178491	0.73581	0.171751	0.537007	-1.20319	-1.23483	-1.31706	+	Cluster -3	611	2.96039	0.00324541	sp|Q96PZ2|F111A_HUMAN	Q96PZ2	F111A_HUMAN	FAM111A	Serine protease FAM111A
1.44734	0.856931	0.162368	0.552667	0.323655	0.351561	-1.13074	-1.433	-1.13078	+	Cluster -3	843	2.81861	0.00398873	sp|Q6GQQ9|OTU7B_HUMAN	Q6GQQ9	OTU7B_HUMAN	OTUD7B	OTU domain-containing protein 7B
1.27786	0.846659	0.132847	0.554263	0.496813	0.487546	-1.16379	-1.42148	-1.21073	+	Cluster -3	1259	3.1571	0.00295868	sp|P48553|TPC10_HUMAN	P48553	TPC10_HUMAN	TRAPPC10	Trafficking protein particle complex subunit 10
1.25271	0.599043	0.280265	0.816583	0.457688	0.397868	-1.02415	-1.54108	-1.23892	+	Cluster -3	256	3.12116	0.00295825	sp|Q15527|SURF2_HUMAN	Q15527	SURF2_HUMAN	SURF2	Surfeit locus protein 2
1.37344	0.468405	0.367217	0.461273	0.568538	0.542526	-1.02034	-1.57578	-1.18528	+	Cluster -3	530	3.02809	0.00293617	sp|O75475|PSIP1_HUMAN	O75475	PSIP1_HUMAN	PSIP1	PC4 and SFRS1-interacting protein
1.22712	0.798665	-0.373112	0.754741	0.569124	0.529323	-0.745851	-1.08148	-1.67853	+	Cluster -3	614	1.90934	0.0108015	sp|Q9Y2D8|ADIP_HUMAN	Q9Y2D8	ADIP_HUMAN	SSX2IP	Afadin- and alpha-actinin-binding protein
1.36972	0.868595	-0.248167	0.615336	0.626002	0.342842	-1.04865	-1.0073	-1.51837	+	Cluster -3	259	2.10948	0.00863647	sp|Q96EU6|RRP36_HUMAN	Q96EU6	RRP36_HUMAN	RRP36	Ribosomal RNA processing protein 36 homolog
1.29216	0.948486	-0.3092	0.731231	0.485251	0.319065	-0.943553	-0.820721	-1.70272	+	Cluster -3	661	1.82994	0.0120897	sp|Q9H7D7|WDR26_HUMAN	Q9H7D7	WDR26_HUMAN	WDR26	WD repeat-containing protein 26
1.38065	0.536828	-0.0983868	0.715582	0.479115	0.51553	-0.899587	-0.804204	-1.82553	+	Cluster -3	335	1.96537	0.0101851	sp|O95238|SPDEF_HUMAN	O95238	SPDEF_HUMAN	SPDEF	SAM pointed domain-containing Ets transcription factor
1.30769	0.823646	0.0421131	0.880229	0.153974	0.350139	-0.933329	-0.87999	-1.74447	+	Cluster -3	736	2.12383	0.00847631	sp|Q9BWT3|PAPOG_HUMAN	Q9BWT3	PAPOG_HUMAN	PAPOLG	Poly(A) polymerase gamma
1.01898	0.712175	0.0249204	0.0919371	1.04907	0.751639	-0.916435	-1.04415	-1.68814	+	Cluster -3	669	2.32766	0.00625378	sp|Q96PK6|RBM14_HUMAN	Q96PK6	RBM14_HUMAN	RBM14	RNA-binding protein 14
1.13929	0.619914	-0.128958	0.345354	0.655511	1.00632	-0.852796	-1.13243	-1.65221	+	Cluster -3	346	2.30783	0.0064362	sp|P50613|CDK7_HUMAN	P50613	CDK7_HUMAN	CDK7	Cyclin-dependent kinase 7
1.18752	0.527481	0.0510811	0.49084	0.613104	0.915235	-1.09622	-1.20796	-1.48108	+	Cluster -3	112	2.95957	0.00324	sp|Q9Y421|FA32A_HUMAN	Q9Y421	FA32A_HUMAN	FAM32A	Protein FAM32A
1.16153	0.723295	0.153456	0.442405	0.748207	0.62165	-1.16966	-1.32485	-1.35603	+	Cluster -3	353	3.42316	0.00304094	sp|Q8TDN6|BRX1_HUMAN	Q8TDN6	BRX1_HUMAN	BRIX1	Ribosome biogenesis protein BRX1 homolog
1.24281	0.882077	-0.0462877	0.359955	0.71304	0.559385	-1.12598	-1.05229	-1.53271	+	Cluster -3	746	2.60761	0.00450535	sp|Q15910|EZH2_HUMAN	Q15910	EZH2_HUMAN	EZH2	Histone-lysine N-methyltransferase EZH2
1.4507	0.522632	-0.186279	0.386898	0.776496	0.610564	-1.28573	-0.805487	-1.46979	+	Cluster -3	521	2.04928	0.00925028	sp|Q14119|VEZF1_HUMAN	Q14119	VEZF1_HUMAN	VEZF1	Vascular endothelial zinc finger 1
1.20503	0.989608	-0.467267	0.0940377	0.932401	0.670349	-1.01855	-0.988635	-1.41697	+	Cluster -3	905	1.71961	0.0145699	sp|Q15361|TTF1_HUMAN	Q15361	TTF1_HUMAN	TTF1	Transcription termination factor 1
1.46205	0.773149	-0.312439	0.292098	0.844059	0.459068	-1.05314	-1.15588	-1.30897	+	Cluster -3	220	1.94779	0.0105141	sp|O75446|SAP30_HUMAN	O75446	SAP30_HUMAN	SAP30	Histone deacetylase complex subunit SAP30
0.948969	1.11005	0.305735	-0.0177452	0.509888	0.658449	-0.729402	-0.815402	-1.97054	+	Cluster -3	737	2.11702	0.00853703	sp|Q8ND82|Z280C_HUMAN	Q8ND82	Z280C_HUMAN	ZNF280C	Zinc finger protein 280C
1.01094	1.2124	0.410368	0.146892	0.245277	0.660051	-0.997457	-1.01757	-1.6709	+	Cluster -3	654	3.01619	0.00295105	sp|Q9NW82|WDR70_HUMAN	Q9NW82	WDR70_HUMAN	WDR70	WD repeat-containing protein 70
0.920289	1.03334	0.379768	0.342592	0.442618	0.722596	-1.0437	-1.17145	-1.62604	+	Cluster -3	178	3.58914	0.00232117	sp|Q8WW12|PCNP_HUMAN	Q8WW12	PCNP_HUMAN	PCNP	PEST proteolytic signal-containing nuclear protein
0.762714	1.36962	0.428628	0.176633	0.318547	0.65011	-1.32401	-0.864922	-1.51732	+	Cluster -3	746	3.00357	0.00307106	sp|Q14137|BOP1_HUMAN	Q14137	BOP1_HUMAN	BOP1	Ribosome biogenesis protein BOP1
0.957205	1.22706	-0.115848	0.470068	0.398242	0.742182	-1.35359	-0.940726	-1.38459	+	Cluster -3	2785	2.47404	0.00495341	sp|O75691|UTP20_HUMAN	O75691	UTP20_HUMAN	UTP20	Small subunit processome component 20 homolog
1.10501	1.12877	-0.038466	0.727524	0.376046	0.359729	-1.32459	-0.831687	-1.50234	+	Cluster -3	1463	2.45235	0.0050947	sp|Q99590|SCAFB_HUMAN	Q99590	SCAFB_HUMAN	SCAF11	Protein SCAF11
0.874783	1.42805	0.329849	0.590778	0.241343	0.215427	-1.3345	-0.948329	-1.39741	+	Cluster -3	601	2.98514	0.00316295	sp|Q15642|CIP4_HUMAN	Q15642	CIP4_HUMAN	TRIP10	Cdc42-interacting protein 4
0.547777	1.55401	0.335869	0.529758	0.362492	0.336574	-1.15686	-0.972446	-1.53717	+	Cluster -3	705	2.66454	0.00431981	sp|P46977|STT3A_HUMAN	P46977	STT3A_HUMAN	STT3A	Dolichyl-diphosphooligosaccharide--protein glycosyltransferase subunit STT3A
1.03926	1.33619	0.428386	0.4494	0.240216	0.117867	-1.05179	-0.89531	-1.66422	+	Cluster -3	361	2.97587	0.00313073	sp|Q8NBU5|ATAD1_HUMAN	Q8NBU5	ATAD1_HUMAN	ATAD1	ATPase family AAA domain-containing protein 1
1.09019	1.51095	0.157984	0.144595	0.286892	0.258947	-1.15357	-0.71974	-1.57625	+	Cluster -3	132	2.33083	0.00624753	sp|Q8N8J7|F241A_HUMAN	Q8N8J7	F241A_HUMAN	FAM241A	Uncharacterized protein FAM241A
1.17059	1.37062	0.254809	0.119494	0.509728	0.158525	-1.29324	-0.93168	-1.35884	+	Cluster -3	1297	2.83772	0.00377208	sp|Q5JTH9|RRP12_HUMAN	Q5JTH9	RRP12_HUMAN	RRP12	RRP12-like protein
1.17021	1.34924	0.195017	0.132176	0.507076	0.194863	-1.22422	-0.801963	-1.5224	+	Cluster -3	808	2.56804	0.00445829	sp|Q4KMP7|TB10B_HUMAN	Q4KMP7	TB10B_HUMAN	TBC1D10B	TBC1 domain family member 10B
1.05864	1.3101	0.114877	0.473501	0.561934	0.137192	-1.30327	-0.927321	-1.42566	+	Cluster -3	1258	2.67141	0.00435765	sp|Q8WVM7|STAG1_HUMAN	Q8WVM7	STAG1_HUMAN	STAG1	Cohesin subunit SA-1
1.00176	1.25101	0.151002	0.496547	0.578745	0.25007	-1.16424	-1.03772	-1.52718	+	Cluster -3	624	2.91654	0.00349137	sp|Q9Y5P4|CERT_HUMAN	Q9Y5P4	CERT_HUMAN	CERT1	Ceramide transfer protein
1.25564	1.17196	0.270817	0.444347	0.320104	0.210178	-1.1731	-0.993628	-1.50632	+	Cluster -3	238	3.06832	0.00296846	sp|Q86WH2|RASF3_HUMAN	Q86WH2	RASF3_HUMAN	RASSF3	Ras association domain-containing protein 3
1.09888	1.25614	0.339561	0.365157	0.401586	0.283014	-1.16685	-1.14496	-1.43252	+	Cluster -3	331	3.51427	0.00294314	sp|Q9Y266|NUDC_HUMAN	Q9Y266	NUDC_HUMAN	NUDC	Nuclear migration protein nudC
1.28388	1.09362	0.212218	0.333944	0.510959	0.283484	-1.16577	-1.13218	-1.42015	+	Cluster -3	434	3.1158	0.00305098	sp|P09104|ENOG_HUMAN	P09104	ENOG_HUMAN	ENO2	Gamma-enolase
1.67247	0.803387	0.251898	0.548358	0.214025	-0.00775702	-0.931661	-1.16063	-1.39008	+	Cluster -3	240	2.37989	0.00594378	sp|P0DN76|U2AF5_HUMAN	P0DN76	U2AF5_HUMAN	U2AF1L5	Splicing factor U2AF 35 kDa subunit-like protein
1.44898	0.876011	0.266521	0.55658	0.478885	-0.0379249	-0.806721	-1.39013	-1.3922	+	Cluster -3	462	2.54325	0.00448733	sp|Q9UJM3|ERRFI_HUMAN	Q9UJM3	ERRFI_HUMAN	ERRFI1	ERBB receptor feedback inhibitor 1
1.32259	1.14614	0.151392	0.672495	0.434972	-0.226131	-1.0287	-1.00604	-1.46673	+	Cluster -3	290	2.30292	0.00646358	sp|P57076|CF298_HUMAN	P57076	CF298_HUMAN	CFAP298	Cilia- and flagella-associated protein 298
1.48998	1.12077	0.202792	0.506332	0.262365	-0.107198	-0.923336	-1.13825	-1.41345	+	Cluster -3	441	2.48244	0.00497003	sp|Q9BXS6|NUSAP_HUMAN	Q9BXS6	NUSAP_HUMAN	NUSAP1	Nucleolar and spindle-associated protein 1
1.30182	0.997197	0.20341	0.392099	0.417972	0.298225	-0.843038	-0.989297	-1.77839	+	Cluster -3	518	2.51883	0.00470275	sp|Q9UBZ4|APEX2_HUMAN	Q9UBZ4	APEX2_HUMAN	APEX2	DNA-(apurinic or apyrimidinic site) endonuclease 2
1.40465	0.976668	0.104925	0.265393	0.425761	0.419768	-0.778054	-1.24357	-1.57554	+	Cluster -3	547	2.45559	0.00504787	sp|Q8IWB1|IPRI_HUMAN	Q8IWB1	IPRI_HUMAN	ITPRIP	Inositol 1,4,5-trisphosphate receptor-interacting protein
1.40194	0.727884	0.287354	0.447322	0.533546	0.333157	-1.00142	-1.14388	-1.58591	+	Cluster -3	710	2.9423	0.00318049	sp|Q92541|RTF1_HUMAN	Q92541	RTF1_HUMAN	RTF1	RNA polymerase-associated protein RTF1 homolog
1.23659	0.876297	0.324379	0.532867	0.599986	0.156173	-0.895197	-1.17009	-1.661	+	Cluster -3	561	2.94009	0.00321683	sp|P78314|3BP2_HUMAN	P78314	3BP2_HUMAN	SH3BP2	SH3 domain-binding protein 2
1.63688	1.107	0.261814	0.138292	0.160639	0.136004	-1.25277	-1.10822	-1.07964	+	Cluster -3	389	2.73617	0.00409184	sp|Q9HC52|CBX8_HUMAN	Q9HC52	CBX8_HUMAN	CBX8	Chromobox protein homolog 8
1.52325	0.959654	0.252711	0.482461	0.11222	0.288287	-1.23996	-1.18575	-1.19287	+	Cluster -3	365	2.87451	0.00349329	sp|Q15050|RRS1_HUMAN	Q15050	RRS1_HUMAN	RRS1	Ribosome biogenesis regulatory protein homolog
1.59724	0.876875	0.00959893	0.456854	0.274449	0.349414	-1.32011	-1.20126	-1.04307	+	Cluster -3	890	2.34819	0.00609154	sp|Q8NDT2|RB15B_HUMAN	Q8NDT2	RB15B_HUMAN	RBM15B	Putative RNA-binding protein 15B
1.2167	1.10947	0.423773	0.611301	0.266583	0.105707	-1.30734	-1.23342	-1.19278	+	Cluster -3	362	3.58571	0.00230435	sp|Q8IUS5|EPHX4_HUMAN	Q8IUS5	EPHX4_HUMAN	EPHX4	Epoxide hydrolase 4
1.09337	1.15352	0.546937	0.730906	0.123349	0.0468845	-1.11021	-1.45068	-1.13407	+	Cluster -3	1960	3.42669	0.00309524	sp|Q9UGU0|TCF20_HUMAN	Q9UGU0	TCF20_HUMAN	TCF20	Transcription factor 20
1.1041	1.07679	0.142399	0.727317	0.62902	0.0201457	-1.0886	-1.50806	-1.10311	+	Cluster -3	593	2.70091	0.00424631	sp|Q06124|PTN11_HUMAN	Q06124	PTN11_HUMAN	PTPN11	Tyrosine-protein phosphatase non-receptor type 11
1.06101	1.04787	0.454478	0.528903	0.628256	0.0752584	-1.20136	-1.49818	-1.09624	+	Cluster -3	858	3.61031	0.00239098	sp|Q8IXK0|PHC2_HUMAN	Q8IXK0	PHC2_HUMAN	PHC2	Polyhomeotic-like protein 2
1.25355	1.12407	0.0881974	0.275925	0.527421	0.443367	-1.24577	-1.31088	-1.15589	+	Cluster -3	648	2.90449	0.00346667	sp|Q15397|PUM3_HUMAN	Q15397	PUM3_HUMAN	PUM3	Pumilio homolog 3
1.1982	1.0739	0.343126	0.133695	0.372427	0.636282	-1.1603	-1.21948	-1.37784	+	Cluster -3	466	3.42218	0.00303207	sp|P08670|VIME_HUMAN	P08670	VIME_HUMAN	VIM	Vimentin
1.30913	0.900977	0.473249	0.240372	0.337295	0.526486	-1.17965	-1.37347	-1.23438	+	Cluster -3	211	3.86542	0.00182979	sp|O95816|BAG2_HUMAN	O95816	BAG2_HUMAN	BAG2	BAG family molecular chaperone regulator 2
1.20755	0.993872	0.648521	0.388809	0.492266	0.0182429	-1.06216	-1.36784	-1.31926	+	Cluster -3	350	4.12501	0.00112977	sp|Q9BW91|NUDT9_HUMAN	Q9BW91	NUDT9_HUMAN	NUDT9	ADP-ribose pyrophosphatase, mitochondrial
1.20218	1.1084	0.437196	0.310877	0.28727	0.413368	-1.03061	-1.3655	-1.36319	+	Cluster -3	392	3.80459	0.00169458	sp|Q9H0C8|ILKAP_HUMAN	Q9H0C8	ILKAP_HUMAN	ILKAP	Integrin-linked kinase-associated serine/threonine phosphatase 2C
1.22833	1.25714	0.395573	0.344386	0.253587	0.16125	-0.938478	-1.26474	-1.43705	+	Cluster -3	258	3.32397	0.0027154	sp|Q14331|FRG1_HUMAN	Q14331	FRG1_HUMAN	FRG1	Protein FRG1
1.27172	0.894131	0.416096	0.620431	0.173585	0.371405	-0.941345	-1.53357	-1.27245	+	Cluster -3	661	3.28224	0.00271322	sp|Q9HDC5|JPH1_HUMAN	Q9HDC5	JPH1_HUMAN	JPH1	Junctophilin-1
1.19508	0.90319	0.530939	0.371624	0.450386	0.373796	-0.996349	-1.40931	-1.41936	+	Cluster -3	781	4.10654	0.00136296	sp|Q9UIU6|SIX4_HUMAN	Q9UIU6	SIX4_HUMAN	SIX4	Homeobox protein SIX4
1.21857	0.84739	0.381655	0.492812	0.496941	0.404615	-1.05856	-1.43384	-1.34958	+	Cluster -3	633	3.79474	0.0016381	sp|O43390|HNRPR_HUMAN	O43390	HNRPR_HUMAN	HNRNPR	Heterogeneous nuclear ribonucleoprotein R
0.715606	1.35519	0.24418	0.999392	-0.0451042	0.355193	-1.30955	-1.34516	-0.969742	+	Cluster -3	418	2.40488	0.00573597	sp|Q71F23|CENPU_HUMAN	Q71F23	CENPU_HUMAN	CENPU	Centromere protein U
0.971302	1.56172	0.317492	0.663446	0.00903201	-0.0940911	-1.45353	-0.943367	-1.032	+	Cluster -3	301	2.40722	0.00566639	sp|Q9Y314|NOSIP_HUMAN	Q9Y314	NOSIP_HUMAN	NOSIP	Nitric oxide synthase-interacting protein
1.14675	1.57309	0.179611	0.549245	-0.0945326	0.00670989	-1.26302	-1.23834	-0.859513	+	Cluster -3	1054	2.3071	0.00643491	sp|Q03701|CEBPZ_HUMAN	Q03701	CEBPZ_HUMAN	CEBPZ	CCAAT/enhancer-binding protein zeta
1.16982	1.34487	-0.0726484	0.66513	0.280752	0.107372	-1.41093	-1.28895	-0.795414	+	Cluster -3	453	2.12158	0.00850847	sp|Q969Q6|P2R3C_HUMAN	Q969Q6	P2R3C_HUMAN	PPP2R3C	Serine/threonine-protein phosphatase 2A regulatory subunit B'' subunit gamma
1.28084	1.21315	-0.0262054	0.935462	-0.129459	0.130767	-1.29297	-1.25192	-0.859669	+	Cluster -3	211	1.93347	0.0106142	sp|P57729|RAB38_HUMAN	P57729	RAB38_HUMAN	RAB38	Ras-related protein Rab-38
1.49664	0.55247	-0.114669	0.850888	0.156441	0.529538	-1.60739	-0.717472	-1.14644	+	Cluster -3	536	1.84005	0.0119111	sp|Q13573|SNW1_HUMAN	Q13573	SNW1_HUMAN	SNW1	SNW domain-containing protein 1
1.09673	0.802833	0.268373	1.14236	0.0090529	0.303015	-1.52879	-0.768367	-1.3252	+	Cluster -3	61	2.31402	0.00645026	sp|P04733|MT1F_HUMAN	P04733	MT1F_HUMAN	MT1F	Metallothionein-1F
1.33331	1.13773	0.163148	0.829954	-0.089646	0.0736432	-1.52366	-0.849061	-1.07541	+	Cluster -3	316	2.17842	0.00784536	sp|Q9H1D9|RPC6_HUMAN	Q9H1D9	RPC6_HUMAN	POLR3F	DNA-directed RNA polymerase III subunit RPC6
1.31078	0.938115	-0.240954	0.863723	0.461862	0.23212	-1.42831	-1.01235	-1.12499	+	Cluster -3	888	2.08937	0.00883372	sp|O94880|PHF14_HUMAN	O94880	PHF14_HUMAN	PHF14	PHD finger protein 14
1.26888	1.01986	0.151525	0.912235	0.347824	-0.100767	-1.35302	-1.05475	-1.1918	+	Cluster -3	610	2.42055	0.00556229	sp|O15213|WDR46_HUMAN	O15213	WDR46_HUMAN	WDR46	WD repeat-containing protein 46
0.886166	0.693911	1.0341	0.351326	0.417318	0.280163	-0.514102	-1.75571	-1.39318	+	Cluster -3	211	2.87159	0.00347774	sp|Q9NWM8|FKB14_HUMAN	Q9NWM8	FKB14_HUMAN	FKBP14	Peptidyl-prolyl cis-trans isomerase FKBP14
0.856339	0.555494	0.865516	0.796115	0.25255	0.381166	-0.522901	-1.6991	-1.48518	+	Cluster -3	882	2.69799	0.00424908	sp|Q8TEJ3|SH3R3_HUMAN	Q8TEJ3	SH3R3_HUMAN	SH3RF3	E3 ubiquitin-protein ligase SH3RF3
0.604055	0.768087	0.955452	0.589925	0.413493	0.149	-0.157123	-1.51045	-1.81244	+	Cluster -3	406	2.00679	0.00963761	sp|Q9BS26|ERP44_HUMAN	Q9BS26	ERP44_HUMAN	ERP44	Endoplasmic reticulum resident protein 44
0.60589	0.674938	0.395682	1.07052	0.91093	0.0480283	-0.680076	-1.54544	-1.48047	+	Cluster -3	879	2.57088	0.00445436	sp|Q9H0X9|OSBL5_HUMAN	Q9H0X9	OSBL5_HUMAN	OSBPL5	Oxysterol-binding protein-related protein 5
0.733414	0.634719	0.905926	0.658849	0.626299	0.35496	-1.08884	-1.64654	-1.17879	+	Cluster -3	407	4.40237	0	sp|P41970|ELK3_HUMAN	P41970	ELK3_HUMAN	ELK3	ETS domain-containing protein Elk-3
0.895631	0.716442	0.769504	0.799861	0.462471	0.244833	-0.993004	-1.44032	-1.45542	+	Cluster -3	909	4.22927	0.000206897	sp|Q8IYU2|HACE1_HUMAN	Q8IYU2	HACE1_HUMAN	HACE1	E3 ubiquitin-protein ligase HACE1
0.731509	0.880488	0.740745	0.947551	0.361343	0.130995	-0.817199	-1.50932	-1.46612	+	Cluster -3	441	3.23282	0.00289145	sp|O75530|EED_HUMAN	O75530	EED_HUMAN	EED	Polycomb protein EED
0.869064	0.988696	0.177473	0.430284	0.730666	0.680948	-1.36595	-1.12489	-1.38629	+	Cluster -3	156	3.67182	0.00205858	sp|O60675|MAFK_HUMAN	O60675	MAFK_HUMAN	MAFK	Transcription factor MafK
0.932523	0.8271	0.247031	0.429604	0.994025	0.409443	-1.50452	-1.00205	-1.33316	+	Cluster -3	620	3.32533	0.00272966	sp|Q53F19|NCBP3_HUMAN	Q53F19	NCBP3_HUMAN	NCBP3	Nuclear cap-binding protein subunit 3
0.378878	0.643609	0.61558	0.770497	0.951919	0.580309	-1.45256	-1.14135	-1.34688	+	Cluster -3	385	5.08519	0	sp|Q9BX40|LS14B_HUMAN	Q9BX40	LS14B_HUMAN	LSM14B	Protein LSM14 homolog B
0.696628	0.903052	0.377633	0.729157	0.770548	0.461112	-1.38107	-1.13374	-1.42332	+	Cluster -3	365	4.53901	0	sp|Q92664|TF3A_HUMAN	Q92664	TF3A_HUMAN	GTF3A	Transcription factor IIIA
0.583481	0.825065	0.620731	0.676994	0.804045	0.459949	-1.23221	-1.29713	-1.44092	+	Cluster -3	1410	5.50245	0	sp|Q9P2E9|RRBP1_HUMAN	Q9P2E9	RRBP1_HUMAN	RRBP1	Ribosome-binding protein 1
0.536584	0.972887	0.68318	0.647635	0.589899	0.525133	-1.427	-1.15662	-1.37171	+	Cluster -3	638	5.20809	0	sp|P08240|SRPRA_HUMAN	P08240	SRPRA_HUMAN	SRPRA	Signal recognition particle receptor subunit alpha
0.445974	1.00537	0.573548	0.599873	0.665445	0.659716	-1.38789	-1.19371	-1.36832	+	Cluster -3	645	4.82332	0	sp|Q9NTW7|ZF64B_HUMAN	Q9NTW7	ZF64B_HUMAN	ZFP64	Zinc finger protein 64
0.536266	0.768873	0.478641	0.954772	0.640686	0.556525	-1.41041	-1.05968	-1.46567	+	Cluster -3	538	4.61116	0	sp|Q6SPF0|SAMD1_HUMAN	Q6SPF0	SAMD1_HUMAN	SAMD1	Atherin
0.340993	0.979684	0.44554	0.660401	0.609687	0.87235	-1.50745	-1.22609	-1.17512	+	Cluster -3	282	4.12399	0.00112121	sp|Q9Y3B9|RRP15_HUMAN	Q9Y3B9	RRP15_HUMAN	RRP15	RRP15-like protein
0.38303	0.866782	0.229721	0.645475	0.859041	0.906339	-1.28176	-1.18644	-1.42219	+	Cluster -3	477	4.33162	0.000235294	sp|Q9ULS5|TMCC3_HUMAN	Q9ULS5	TMCC3_HUMAN	TMCC3	Transmembrane and coiled-coil domain protein 3
0.323376	1.14401	0.634534	0.209008	0.52267	0.963551	-1.41172	-0.968372	-1.41705	+	Cluster -3	423	3.06123	0.00299631	sp|Q9NXH8|TOR4A_HUMAN	Q9NXH8	TOR4A_HUMAN	TOR4A	Torsin-4A
0.411458	0.971997	0.556453	0.248284	1.03198	0.654391	-1.30534	-1.1922	-1.37701	+	Cluster -3	516	3.62838	0.00251383	sp|Q15392|DHC24_HUMAN	Q15392	DHC24_HUMAN	DHCR24	Delta(24)-sterol reductase
0.523735	1.22517	0.479885	0.469837	0.488539	0.700407	-1.25189	-1.27457	-1.36111	+	Cluster -3	4579	3.93862	0.0020355	sp|Q9NZJ4|SACS_HUMAN	Q9NZJ4	SACS_HUMAN	SACS	Sacsin
0.51859	1.21812	0.561086	0.520084	0.682175	0.389955	-1.27995	-1.3089	-1.30117	+	Cluster -3	420	4.07361	0.00128671	sp|Q96HD1|CREL1_HUMAN	Q96HD1	CREL1_HUMAN	CRELD1	Protein disulfide isomerase CRELD1
0.231555	1.28319	0.547251	0.433595	0.745795	0.556592	-1.56922	-1.10461	-1.12414	+	Cluster -3	271	3.04983	0.00301091	sp|Q9Y5M8|SRPRB_HUMAN	Q9Y5M8	SRPRB_HUMAN	SRPRB	Signal recognition particle receptor subunit beta
0.308233	1.33027	0.743138	0.38749	0.495723	0.551765	-1.40117	-1.1739	-1.24155	+	Cluster -3	519	3.44776	0.00296657	sp|Q14554|PDIA5_HUMAN	Q14554	PDIA5_HUMAN	PDIA5	Protein disulfide-isomerase A5
0.406025	1.25788	0.72297	0.605079	0.81227	-0.0879804	-1.02882	-1.22764	-1.45979	+	Cluster -3	61	2.83448	0.00395455	sp|P02795|MT2_HUMAN	P02795	MT2_HUMAN	MT2A	Metallothionein-2
0.632618	1.26531	0.410933	0.345861	0.844008	0.288407	-1.0437	-1.1953	-1.54814	+	Cluster -3	338	3.14849	0.00294737	sp|O95433|AHSA1_HUMAN	O95433	AHSA1_HUMAN	AHSA1	Activator of 90 kDa heat shock protein ATPase homolog 1
0.245201	1.3576	0.304627	0.884361	0.749965	0.143433	-1.23877	-0.986744	-1.45967	+	Cluster -3	61	2.46428	0.00505727	sp|P80297|MT1X_HUMAN	P80297	MT1X_HUMAN	MT1X	Metallothionein-1X
0.156262	1.01203	0.558921	0.648817	0.819126	0.626292	-1.0014	-1.11365	-1.70639	+	Cluster -3	103	3.21979	0.00306787	sp|P27469|G0S2_HUMAN	P27469	G0S2_HUMAN	G0S2	G0/G1 switch protein 2
0.0784046	1.08082	0.546393	0.770202	0.834604	0.490825	-1.03009	-1.1668	-1.60435	+	Cluster -3	643	3.08424	0.00304183	sp|Q6P1M0|S27A4_HUMAN	Q6P1M0	S27A4_HUMAN	SLC27A4	Long-chain fatty acid transport protein 4
0.217746	1.21791	0.205761	0.888757	0.67355	0.547166	-1.07077	-1.06993	-1.61019	+	Cluster -3	199	2.80534	0.00392244	sp|Q06830|PRDX1_HUMAN	Q06830	PRDX1_HUMAN	PRDX1	Peroxiredoxin-1
0.203861	1.33676	0.238885	0.778218	0.514058	0.640422	-1.06466	-1.01055	-1.63699	+	Cluster -3	125	2.57814	0.00443756	sp|P82932|RT06_HUMAN	P82932	RT06_HUMAN	MRPS6	28S ribosomal protein S6, mitochondrial
0.114193	1.24095	0.508029	0.754348	0.617208	0.536862	-1.21004	-0.960037	-1.60151	+	Cluster -3	465	2.86518	0.00354118	sp|Q9BUB5|MKNK1_HUMAN	Q9BUB5	MKNK1_HUMAN	MKNK1	MAP kinase-interacting serine/threonine-protein kinase 1
0.228537	1.30552	0.567588	0.735598	0.477371	0.478399	-1.18772	-1.0588	-1.54649	+	Cluster -3	812	3.03555	0.00297307	sp|O94901|SUN1_HUMAN	O94901	SUN1_HUMAN	SUN1	SUN domain-containing protein 1
0.76423	1.17067	0.277155	0.652879	0.430136	0.54354	-1.0483	-1.20792	-1.58239	+	Cluster -3	651	3.42937	0.00304192	sp|Q14680|MELK_HUMAN	Q14680	MELK_HUMAN	MELK	Maternal embryonic leucine zipper kinase
0.822109	0.945645	0.229476	0.610967	0.541012	0.755095	-1.10361	-1.37596	-1.42473	+	Cluster -3	857	3.98077	0.002	sp|P78316|NOP14_HUMAN	P78316	NOP14_HUMAN	NOP14	Nucleolar protein 14
0.869592	1.03743	0.0666931	0.814798	0.569427	0.476197	-1.09991	-1.35279	-1.38144	+	Cluster -3	852	3.27541	0.00267322	sp|Q86Y91|KI18B_HUMAN	Q86Y91	KI18B_HUMAN	KIF18B	Kinesin-like protein KIF18B
1.02082	0.800027	-0.0146402	0.815236	0.620096	0.590654	-1.15165	-1.32129	-1.35925	+	Cluster -3	454	3.27233	0.00265366	sp|P42167|LAP2B_HUMAN	P42167	LAP2B_HUMAN	TMPO	Lamina-associated polypeptide 2, isoforms beta/gamma
0.626034	1.00385	0.293062	0.878798	0.361075	0.688932	-0.953327	-1.56736	-1.33106	+	Cluster -3	826	3.41452	0.00300578	sp|Q9BQ52|RNZ2_HUMAN	Q9BQ52	RNZ2_HUMAN	ELAC2	Zinc phosphodiesterase ELAC protein 2
0.473137	1.16856	0.28978	0.644652	0.455194	0.779674	-0.933791	-1.64457	-1.23264	+	Cluster -3	389	3.10563	0.00302724	sp|P31350|RIR2_HUMAN	P31350	RIR2_HUMAN	RRM2	Ribonucleoside-diphosphate reductase subunit M2
0.864949	0.684199	0.404067	0.630127	0.561726	0.672683	-0.642546	-1.55986	-1.61534	+	Cluster -3	785	3.15351	0.00297751	sp|O94782|UBP1_HUMAN	O94782	UBP1_HUMAN	USP1	Ubiquitin carboxyl-terminal hydrolase 1
0.241959	1.02095	0.73886	0.465164	0.554502	0.782703	-0.756368	-1.51471	-1.53307	+	Cluster -3	157	3.0709	0.00297952	sp|P56377|AP1S2_HUMAN	P56377	AP1S2_HUMAN	AP1S2	AP-1 complex subunit sigma-2
0.7239	0.850149	0.515133	0.634031	0.663934	0.565216	-1.06506	-1.55082	-1.33648	+	Cluster -3	1100	4.93695	0	sp|O95466|FMNL1_HUMAN	O95466	FMNL1_HUMAN	FMNL1	Formin-like protein 1
0.543034	0.99597	0.270802	0.811629	0.750768	0.535344	-1.15004	-1.32253	-1.43498	+	Cluster -3	240	4.07067	0.00126897	sp|Q96C19|EFHD2_HUMAN	Q96C19	EFHD2_HUMAN	EFHD2	EF-hand domain-containing protein D2
0.530213	0.601134	0.516566	0.710327	0.861156	0.702114	-0.931966	-1.41019	-1.57935	+	Cluster -3	284	4.53841	0	sp|O60725|ICMT_HUMAN	O60725	ICMT_HUMAN	ICMT	Protein-S-isoprenylcysteine O-methyltransferase
0.370181	0.905283	0.477275	0.726013	0.729734	0.705633	-0.992457	-1.41041	-1.51125	+	Cluster -3	742	4.2268	0.000205128	sp|P16070|CD44_HUMAN	P16070	CD44_HUMAN	CD44	CD44 antigen
0.38038	0.978613	0.552388	0.724123	0.873573	0.371035	-1.01362	-1.55881	-1.30768	+	Cluster -3	289	3.68795	0.00184746	sp|Q9NZ63|TLS1_HUMAN	Q9NZ63	TLS1_HUMAN	C9orf78	Telomere length and silencing protein 1 homolog
0.141699	0.934588	0.827421	0.666918	0.752354	0.527469	-0.933906	-1.51957	-1.39697	+	Cluster -3	181	3.40399	0.00297143	sp|O43665|RGS10_HUMAN	O43665	RGS10_HUMAN	RGS10	Regulator of G-protein signaling 10
1.32908	0.201386	0.816404	0.404651	-0.0070162	0.878168	-1.067	-0.971824	-1.58385	+	Cluster -3	543	2.42175	0.00557566	sp|O96017|CHK2_HUMAN	O96017	CHK2_HUMAN	CHEK2	Serine/threonine-protein kinase Chk2
1.07357	0.507628	0.793823	0.431544	0.209032	0.698407	-1.04962	-0.788707	-1.87567	+	Cluster -3	149	2.81197	0.00396639	sp|Q9NX01|TXN4B_HUMAN	Q9NX01	TXN4B_HUMAN	TXNL4B	Thioredoxin-like protein 4B
1.07697	0.269177	0.757157	0.197804	0.589563	0.854566	-1.287	-0.782145	-1.67609	+	Cluster -3	2002	2.77456	0.0040267	sp|Q7RTP6|MICA3_HUMAN	Q7RTP6	MICA3_HUMAN	MICAL3	[F-actin]-monooxygenase MICAL3
1.15337	0.192809	0.874429	0.358356	0.325124	0.890227	-1.10319	-1.30544	-1.38568	+	Cluster -3	184	3.116	0.00305697	sp|Q8TCA0|LRC20_HUMAN	Q8TCA0	LRC20_HUMAN	LRRC20	Leucine-rich repeat-containing protein 20
1.0028	0.231974	0.987707	0.74619	0.287466	0.580666	-1.1615	-1.16342	-1.51188	+	Cluster -3	1101	3.42385	0.00304985	sp|Q8IY18|SMC5_HUMAN	Q8IY18	SMC5_HUMAN	SMC5	Structural maintenance of chromosomes protein 5
1.06178	0.0852453	0.906844	0.619554	0.434369	0.723751	-1.282	-1.11195	-1.4376	+	Cluster -3	605	3.27674	0.00268642	sp|Q5T0N5|FBP1L_HUMAN	Q5T0N5	FBP1L_HUMAN	FNBP1L	Formin-binding protein 1-like
1.07222	0.205519	1.04592	0.505222	0.68792	0.294475	-1.14363	-1.20549	-1.46214	+	Cluster -3	393	3.33079	0.00274406	sp|Q99536|VAT1_HUMAN	Q99536	VAT1_HUMAN	VAT1	Synaptic vesicle membrane protein VAT-1 homolog
1.16871	0.201682	1.0028	0.350923	0.526033	0.518514	-1.29393	-0.935109	-1.53962	+	Cluster -3	1233	3.10285	0.00302136	sp|Q6ZU35|CRACD_HUMAN	Q6ZU35	CRACD_HUMAN	CRACD	Capping protein inhibiting regulator of actin dynamics
1.38453	0.0119851	0.770113	0.445816	0.766617	0.258578	-1.14046	-0.918463	-1.57871	+	Cluster -3	140	2.36428	0.00597161	sp|P35080|PROF2_HUMAN	P35080	PROF2_HUMAN	PFN2	Profilin-2
0.910131	0.694783	0.75652	0.554217	0.626993	0.420123	-1.37947	-1.28192	-1.30138	+	Cluster -3	464	6.56253	0	sp|Q96I51|RCC1L_HUMAN	Q96I51	RCC1L_HUMAN	RCC1L	RCC1-like G exchanging factor-like protein
0.801385	0.570207	0.843734	0.784032	0.497757	0.442484	-1.4004	-1.0726	-1.4666	+	Cluster -3	2488	4.80883	0	sp|Q8IVL1|NAV2_HUMAN	Q8IVL1	NAV2_HUMAN	NAV2	Neuron navigator 2
0.700834	0.716034	0.990851	0.720967	0.38141	0.361355	-1.63976	-0.975373	-1.25632	+	Cluster -3	288	4.04975	0.00137748	sp|Q9Y2Y9|KLF13_HUMAN	Q9Y2Y9	KLF13_HUMAN	KLF13	Krueppel-like factor 13
0.949101	0.391913	0.865937	0.408517	0.664237	0.574688	-0.927852	-1.22435	-1.70219	+	Cluster -3	539	3.56214	0.00274126	sp|Q8N531|FBXL6_HUMAN	Q8N531	FBXL6_HUMAN	FBXL6	F-box/LRR-repeat protein 6
0.802342	0.446174	0.440088	0.668351	0.752556	0.809076	-1.12993	-1.13858	-1.65008	+	Cluster -3	1608	4.39844	0	sp|Q9Y6R4|M3K4_HUMAN	Q9Y6R4	M3K4_HUMAN	MAP3K4	Mitogen-activated protein kinase kinase kinase 4
0.931021	0.465569	0.576879	0.51432	0.53043	0.853064	-1.0642	-1.05881	-1.74827	+	Cluster -3	195	3.59777	0.00234686	sp|Q99653|CHP1_HUMAN	Q99653	CHP1_HUMAN	CHP1	Calcineurin B homologous protein 1
0.918306	0.469222	0.73236	0.725191	0.508061	0.531808	-1.13712	-1.00989	-1.73794	+	Cluster -3	476	3.80098	0.00167805	sp|O75674|TM1L1_HUMAN	O75674	TM1L1_HUMAN	TOM1L1	TOM1-like protein 1
1.02203	0.596573	0.610876	0.582499	0.564142	0.572604	-1.21284	-1.4851	-1.25078	+	Cluster -3	1005	5.09356	0	sp|O43491|E41L2_HUMAN	O43491	E41L2_HUMAN	EPB41L2	Band 4.1-like protein 2
1.08766	0.482296	0.522938	0.67854	0.512127	0.64114	-1.37192	-1.41181	-1.14097	+	Cluster -3	121	4.33557	0.00024	sp|Q9H246|CA021_HUMAN	Q9H246	CA021_HUMAN	C1orf21	Uncharacterized protein C1orf21
0.90206	0.558499	0.482255	0.581905	0.829165	0.592336	-1.1062	-1.3557	-1.48432	+	Cluster -3	890	4.72376	0	sp|Q14693|LPIN1_HUMAN	Q14693	LPIN1_HUMAN	LPIN1	Phosphatidate phosphatase LPIN1
1.04345	0.214518	0.621771	0.6335	0.713791	0.683431	-1.27068	-1.28953	-1.35025	+	Cluster -3	205	4.07578	0.00129577	sp|Q13257|MD2L1_HUMAN	Q13257	MD2L1_HUMAN	MAD2L1	Mitotic spindle assembly checkpoint protein MAD2A
0.945021	0.473383	0.702618	0.5509	0.593175	0.69757	-1.23002	-1.34909	-1.38355	+	Cluster -3	471	5.31222	0	sp|Q8N684|CPSF7_HUMAN	Q8N684	CPSF7_HUMAN	CPSF7	Cleavage and polyadenylation specificity factor subunit 7
0.94642	0.431292	0.605233	0.657027	0.737312	0.582566	-1.23923	-1.34164	-1.37898	+	Cluster -3	194	5.09863	0	sp|P00568|KAD1_HUMAN	P00568	KAD1_HUMAN	AK1	Adenylate kinase isoenzyme 1
0.708498	0.438858	0.967447	0.592478	0.557164	0.684818	-1.15292	-1.39295	-1.40339	+	Cluster -3	1450	4.88287	0	sp|Q96P48|ARAP1_HUMAN	Q96P48	ARAP1_HUMAN	ARAP1	Arf-GAP with Rho-GAP domain, ANK repeat and PH domain-containing protein 1
0.548417	0.658137	0.736685	0.598687	0.634592	0.809642	-1.24628	-1.37502	-1.36485	+	Cluster -3	336	6.52158	0	sp|O75794|CD123_HUMAN	O75794	CD123_HUMAN	CDC123	Cell division cycle protein 123 homolog
0.621895	0.516281	0.971137	0.775337	0.683568	0.377177	-1.26742	-1.31919	-1.35879	+	Cluster -3	360	4.77731	0	sp|P28482|MK01_HUMAN	P28482	MK01_HUMAN	MAPK1	Mitogen-activated protein kinase 1
0.567791	0.275344	0.887668	0.937752	0.740428	0.503765	-1.19937	-1.27684	-1.43654	+	Cluster -3	448	4.22982	0.000208696	sp|Q9BT40|INP5K_HUMAN	Q9BT40	INP5K_HUMAN	INPP5K	Inositol polyphosphate 5-phosphatase K
0.91659	0.393387	0.696863	1.03815	0.515622	0.335785	-1.26015	-1.30661	-1.32963	+	Cluster -3	386	3.88121	0.00189011	sp|P53582|MAP11_HUMAN	P53582	MAP11_HUMAN	METAP1	Methionine aminopeptidase 1
0.681682	0.0714637	0.775546	0.880244	0.719015	0.722759	-1.19912	-1.04191	-1.60968	+	Cluster -3	1173	3.66251	0.00214876	sp|Q8IX21|SLF2_HUMAN	Q8IX21	SLF2_HUMAN	SLF2	SMC5-SMC6 complex localization factor protein 2
0.794581	0.493766	0.43965	0.79854	0.832392	0.589135	-1.3346	-1.13693	-1.47654	+	Cluster -3	620	5.04862	0	sp|Q03252|LMNB2_HUMAN	Q03252	LMNB2_HUMAN	LMNB2	Lamin-B2
0.742641	0.413745	0.538481	0.957546	0.613185	0.677584	-1.27642	-1.17484	-1.49192	+	Cluster -3	1011	4.98307	0	sp|Q86W92|LIPB1_HUMAN	Q86W92	LIPB1_HUMAN	PPFIBP1	Liprin-beta-1
0.724893	0.345836	0.613731	0.939398	0.655102	0.655727	-1.14674	-1.26107	-1.52687	+	Cluster -3	1781	4.7691	0	sp|O60292|SI1L3_HUMAN	O60292	SI1L3_HUMAN	SIPA1L3	Signal-induced proliferation-associated 1-like protein 3
0.812372	0.983636	0.874216	0.382058	0.432321	0.40399	-1.08315	-1.44578	-1.35967	+	Cluster -3	928	5.87424	0	sp|Q13574|DGKZ_HUMAN	Q13574	DGKZ_HUMAN	DGKZ	Diacylglycerol kinase zeta
0.835559	0.822247	0.982227	0.348176	0.412834	0.493373	-1.14789	-1.23807	-1.50845	+	Cluster -3	196	5.75222	0	sp|Q5W111|SPRY7_HUMAN	Q5W111	SPRY7_HUMAN	SPRYD7	SPRY domain-containing protein 7
0.800702	0.968495	0.746316	0.218989	0.469053	0.645902	-0.919032	-1.60739	-1.32304	+	Cluster -3	393	4.04707	0.00135948	sp|P04637|P53_HUMAN	P04637	P53_HUMAN	TP53	Cellular tumor antigen p53
1.00189	0.68319	0.562066	0.365593	0.539119	0.778843	-1.21124	-1.2654	-1.45406	+	Cluster -3	1581	4.67112	0	sp|Q15648|MED1_HUMAN	Q15648	MED1_HUMAN	MED1	Mediator of RNA polymerase II transcription subunit 1
1.08141	0.710992	0.500932	0.427612	0.539491	0.660623	-1.14995	-1.41607	-1.35504	+	Cluster -3	1037	4.57519	0	sp|O00291|HIP1_HUMAN	O00291	HIP1_HUMAN	HIP1	Huntingtin-interacting protein 1
1.20278	0.738936	0.471388	0.173396	0.401592	0.817047	-1.1132	-1.16751	-1.52443	+	Cluster -3	1877	3.40403	0.00297994	sp|Q8NEY1|NAV1_HUMAN	Q8NEY1	NAV1_HUMAN	NAV1	Neuron navigator 1
0.931992	0.848263	0.799253	0.195933	0.452329	0.639099	-1.22089	-1.06763	-1.57835	+	Cluster -3	410	4.53973	0	sp|Q14186|TFDP1_HUMAN	Q14186	TFDP1_HUMAN	TFDP1	Transcription factor Dp-1
0.869692	0.811503	0.608912	0.48287	0.503341	0.656888	-1.17239	-1.14508	-1.61574	+	Cluster -3	650	4.83799	0	sp|Q9UNN5|FAF1_HUMAN	Q9UNN5	FAF1_HUMAN	FAF1	FAS-associated factor 1
0.91698	0.991684	0.533163	0.441179	0.519401	0.51982	-1.28427	-1.20052	-1.43744	+	Cluster -3	227	5.14659	0	sp|O43809|CPSF5_HUMAN	O43809	CPSF5_HUMAN	NUDT21	Cleavage and polyadenylation specificity factor subunit 5
0.933283	1.0693	0.391439	0.270398	0.610017	0.604782	-1.28978	-1.34583	-1.2436	+	Cluster -3	881	4.12188	0.00111278	sp|Q8TDD1|DDX54_HUMAN	Q8TDD1	DDX54_HUMAN	DDX54	ATP-dependent RNA helicase DDX54
0.787255	1.00059	0.495212	0.441813	0.685653	0.518083	-1.29505	-1.48277	-1.15079	+	Cluster -3	422	4.71029	0	sp|Q9GZR2|REXO4_HUMAN	Q9GZR2	REXO4_HUMAN	REXO4	RNA exonuclease 4
0.863004	1.0802	0.429348	0.704106	0.257196	0.549632	-1.36184	-1.31593	-1.20571	+	Cluster -3	1411	4.13208	0.00096124	sp|O15014|ZN609_HUMAN	O15014	ZN609_HUMAN	ZNF609	Zinc finger protein 609
0.789622	0.98383	0.579277	0.657649	0.399234	0.528801	-1.4464	-1.19934	-1.29268	+	Cluster -3	1710	5.21273	0	sp|O14646|CHD1_HUMAN	O14646	CHD1_HUMAN	CHD1	Chromodomain-helicase-DNA-binding protein 1
1.15553	0.108267	0.869584	0.333406	0.962316	0.309116	-0.982447	-1.4076	-1.34817	+	Cluster -3	2098	2.75391	0.00411503	sp|Q9Y2I7|FYV1_HUMAN	Q9Y2I7	FYV1_HUMAN	PIKFYVE	1-phosphatidylinositol 3-phosphate 5-kinase
0.740455	0.289787	0.884432	0.360253	1.20087	0.31006	-1.01093	-1.23676	-1.53817	+	Cluster -3	455	2.94683	0.00319608	sp|A4D1U4|DEN11_HUMAN	A4D1U4	DEN11_HUMAN	DENND11	DENN domain-containing protein 11
1.07339	1.22777	0.634957	0.217409	0.0652706	-0.0147088	-0.200061	-1.09376	-1.91028	+	Cluster -3	445	2.03304	0.00938789	sp|Q96I15|SCLY_HUMAN	Q96I15	SCLY_HUMAN	SCLY	Selenocysteine lyase
1.02551	1.06807	0.495114	0.788513	0.344595	-0.342717	-0.510701	-1.02809	-1.8403	+	Cluster -3	304	1.97873	0.0100563	sp|Q8N5C7|DTWD1_HUMAN	Q8N5C7	DTWD1_HUMAN	DTWD1	tRNA-uridine aminocarboxypropyltransferase 1
1.41944	0.890183	-0.0376652	0.720276	-0.083786	0.0423781	-0.0598124	-0.955026	-1.93599	+	Cluster -3	715	1.18436	0.0343003	sp|P20592|MX2_HUMAN	P20592	MX2_HUMAN	MX2	Interferon-induced GTP-binding protein Mx2
1.40961	0.864507	0.0114412	0.649075	0.00403892	0.252307	-0.14765	-1.26886	-1.77447	+	Cluster -3	1164	1.46868	0.0211006	sp|Q9H7Z3|NRDE2_HUMAN	Q9H7Z3	NRDE2_HUMAN	NRDE2	Nuclear exosome regulator NRDE2
0.970759	1.35143	0.428083	0.634005	-0.837701	-0.00208822	0.139793	-0.940835	-1.74344	+	Cluster -3	246	1.1512	0.0360989	sp|Q9BVT8|TMUB1_HUMAN	Q9BVT8	TMUB1_HUMAN	TMUB1	Transmembrane and ubiquitin-like domain-containing protein 1
1.553	1.33155	-0.579704	0.73513	-0.057636	-0.223037	-0.545666	-0.844322	-1.36931	+	Cluster -3	239	1.03225	0.0465617	sp|P54819|KAD2_HUMAN	P54819	KAD2_HUMAN	AK2	Adenylate kinase 2, mitochondrial
1.87792	1.16946	-0.427949	0.482752	0.00686798	-0.444387	-0.69291	-0.801467	-1.17029	+	Cluster -3	731	1.13594	0.0373631	sp|Q13823|NOG2_HUMAN	Q13823	NOG2_HUMAN	GNL2	Nucleolar GTP-binding protein 2
1.30136	1.72157	-0.147066	0.383232	0.052916	-0.338028	-0.880217	-0.834291	-1.25948	+	Cluster -3	1507	1.62878	0.0168003	sp|Q9Y4B6|DCAF1_HUMAN	Q9Y4B6	DCAF1_HUMAN	DCAF1	DDB1- and CUL4-associated factor 1
1.23936	1.45559	-0.227695	0.791016	0.241068	-0.412896	-0.63467	-1.10198	-1.34979	+	Cluster -3	439	1.43085	0.0226031	sp|P55081|MFAP1_HUMAN	P55081	MFAP1_HUMAN	MFAP1	Microfibrillar-associated protein 1
1.7239	0.829278	-0.146591	0.832597	-0.23773	0.154352	-1.09807	-0.695304	-1.36243	+	Cluster -3	221	1.48321	0.0207133	sp|Q9NP50|SHCAF_HUMAN	Q9NP50	SHCAF_HUMAN	SINHCAF	SIN3-HDAC complex-associated factor
1.43867	0.853156	0.178369	0.823801	0.291441	-0.144674	-1.28973	-0.623224	-1.52781	+	Cluster -3	280	2.01352	0.0095804	sp|Q9Y3A4|RRP7A_HUMAN	Q9Y3A4	RRP7A_HUMAN	RRP7A	Ribosomal RNA-processing protein 7 homolog A
1.47164	0.781242	-0.0912886	1.12716	-0.0204566	-0.175846	-1.04967	-0.419127	-1.62367	+	Cluster -3	336	1.2928	0.0285379	sp|Q99496|RING2_HUMAN	Q99496	RING2_HUMAN	RNF2	E3 ubiquitin-protein ligase RING2
1.70214	0.796995	-0.166021	0.816406	0.123908	-0.161893	-0.873293	-0.637275	-1.60097	+	Cluster -3	550	1.38828	0.0242297	sp|Q96A19|C102A_HUMAN	Q96A19	C102A_HUMAN	CCDC102A	Coiled-coil domain-containing protein 102A
1.60105	0.804832	-0.348931	0.519769	0.39656	0.136064	-0.780944	-0.493165	-1.83524	+	Cluster -3	428	1.27887	0.0292096	sp|Q9C0E8|LNP_HUMAN	Q9C0E8	LNP_HUMAN	LNPK	Endoplasmic reticulum junction formation protein lunapark
1.65002	1.05295	-0.249407	0.548578	-0.125992	-0.163168	-0.429585	-0.444724	-1.83868	+	Cluster -3	546	1.07058	0.042966	sp|O15355|PPM1G_HUMAN	O15355	PPM1G_HUMAN	PPM1G	Protein phosphatase 1G
1.41736	0.648896	-0.00194493	1.3624	-0.0154553	-0.456947	-0.425388	-1.01334	-1.51559	+	Cluster -3	520	1.11247	0.0391905	sp|Q8NCT3|K0895_HUMAN	Q8NCT3	K0895_HUMAN	KIAA0895	Uncharacterized protein KIAA0895
1.6809	0.455232	-0.450949	0.916292	0.325788	0.0706471	-0.27516	-1.23719	-1.48557	+	Cluster -3	726	1.08336	0.0417826	sp|Q5W0B1|OBI1_HUMAN	Q5W0B1	OBI1_HUMAN	OBI1	ORC ubiquitin ligase 1
1.61593	0.340761	0.0197022	1.07062	0.223105	0.0820823	-0.662528	-1.42669	-1.26298	+	Cluster -3	540	1.6121	0.0171488	sp|Q9H5H4|ZN768_HUMAN	Q9H5H4	ZN768_HUMAN	ZNF768	Zinc finger protein 768
1.77785	0.294297	0.560055	0.791323	-0.575041	0.227231	-0.639775	-1.05324	-1.3827	+	Cluster -3	458	1.53034	0.0190402	sp|Q9UGK8|SRGEF_HUMAN	Q9UGK8	SRGEF_HUMAN	SERGEF	Secretion-regulating guanine nucleotide exchange factor
1.70719	0.501126	0.139578	1.01698	-0.348995	0.00596687	-0.57286	-0.817134	-1.63185	+	Cluster -3	505	1.29222	0.0285501	sp|Q9P2K6|KLH42_HUMAN	Q9P2K6	KLH42_HUMAN	KLHL42	Kelch-like protein 42
1.97419	0.865066	-0.13703	0.686518	-0.274053	-0.394863	-0.76067	-0.719418	-1.23974	+	Cluster -3	833	1.23516	0.0313303	sp|Q9BVG8|KIFC3_HUMAN	Q9BVG8	KIFC3_HUMAN	KIFC3	Kinesin-like protein KIFC3
1.80251	0.827939	0.21294	0.817447	-0.394756	-0.265018	-0.989598	-0.75719	-1.25427	+	Cluster -3	325	1.62713	0.0167941	sp|Q9BQ69|MACD1_HUMAN	Q9BQ69	MACD1_HUMAN	MACROD1	ADP-ribose glycohydrolase MACROD1
2.05287	0.779069	0.02457	0.536764	-0.650515	-0.124827	-0.961345	-0.549947	-1.10664	+	Cluster -3	2015	1.28811	0.0286877	sp|Q38SD2|LRRK1_HUMAN	Q38SD2	LRRK1_HUMAN	LRRK1	Leucine-rich repeat serine/threonine-protein kinase 1
1.75048	0.845935	0.488533	0.642741	-0.130645	-0.534614	-0.864936	-0.871836	-1.32565	+	Cluster -3	433	2.01686	0.00958503	sp|Q7L2K0|TEDC2_HUMAN	Q7L2K0	TEDC2_HUMAN	TEDC2	Tubulin epsilon and delta complex protein 2
1.94824	0.738705	0.500164	0.558258	-0.349289	-0.612342	-0.822455	-0.971529	-0.989748	+	Cluster -3	539	1.82137	0.0123151	sp|O15156|ZBT7B_HUMAN	O15156	ZBT7B_HUMAN	ZBTB7B	Zinc finger and BTB domain-containing protein 7B
2.02491	0.180804	0.0355639	0.923954	-0.0973371	-0.0969562	-0.850484	-0.956018	-1.16444	+	Cluster -3	468	1.19141	0.033921	sp|Q9Y2Z9|COQ6_HUMAN	Q9Y2Z9	COQ6_HUMAN	COQ6	Ubiquinone biosynthesis monooxygenase COQ6, mitochondrial
1.8594	0.596493	0.241196	0.861585	-0.185742	-0.317264	-0.785516	-1.30436	-0.96579	+	Cluster -3	1966	1.55783	0.018358	sp|Q9UPS6|SET1B_HUMAN	Q9UPS6	SET1B_HUMAN	SETD1B	Histone-lysine N-methyltransferase SETD1B
1.81498	-0.288933	0.486348	0.762224	0.514478	-0.24403	-0.807657	-0.715409	-1.522	+	Cluster -3	444	1.19227	0.0338427	sp|O95864|FADS2_HUMAN	O95864	FADS2_HUMAN	FADS2	Acyl-CoA 6-desaturase
2.08842	0.0354631	0.637127	0.23368	0.0839568	-0.0790927	-1.17603	-0.66914	-1.15439	+	Cluster -3	544	1.54664	0.0185922	sp|Q96D53|COQ8B_HUMAN	Q96D53	COQ8B_HUMAN	COQ8B	Atypical kinase COQ8B, mitochondrial
2.05008	-0.0405493	0.659748	0.352903	0.298612	-0.453311	-0.87276	-0.689229	-1.30549	+	Cluster -3	562	1.33514	0.0262634	sp|Q8NAF0|ZN579_HUMAN	Q8NAF0	ZN579_HUMAN	ZNF579	Zinc finger protein 579
2.04265	-0.151716	0.829775	0.192879	0.120163	-0.155622	-0.864697	-0.642332	-1.3711	+	Cluster -3	1066	1.38507	0.0242906	sp|Q14139|UBE4A_HUMAN	Q14139	UBE4A_HUMAN	UBE4A	Ubiquitin conjugation factor E4 A
2.01253	-0.0209159	0.418799	0.407475	0.0435248	-0.0255105	-0.16123	-1.30261	-1.37206	+	Cluster -3	356	1.145	0.0365566	sp|Q9H3Q1|BORG4_HUMAN	Q9H3Q1	BORG4_HUMAN	CDC42EP4	Cdc42 effector protein 4
1.75566	-0.340438	0.728682	0.210164	0.438111	0.215196	-0.202132	-1.3225	-1.48274	+	Cluster -3	243	1.19194	0.0338778	sp|O95926|SYF2_HUMAN	O95926	SYF2_HUMAN	SYF2	Pre-mRNA-splicing factor SYF2
2.13583	0.307543	0.258498	0.0491947	0.118359	0.00198838	-0.464689	-0.931072	-1.47565	+	Cluster -3	726	1.36375	0.0250516	sp|Q15059|BRD3_HUMAN	Q15059	BRD3_HUMAN	BRD3	Bromodomain-containing protein 3
2.11601	0.0346622	0.393363	0.0302548	0.278199	-0.0575866	-0.517536	-0.678301	-1.59906	+	Cluster -3	976	1.18658	0.0342523	sp|Q86W56|PARG_HUMAN	Q86W56	PARG_HUMAN	PARG	Poly(ADP-ribose) glycohydrolase
1.93301	0.0564847	0.549851	0.159449	0.362757	0.0158879	-0.425119	-1.09975	-1.55257	+	Cluster -3	1081	1.46577	0.0212898	sp|Q17R98|ZN827_HUMAN	Q17R98	ZN827_HUMAN	ZNF827	Zinc finger protein 827
1.92648	0.147088	0.413861	-0.283919	0.549554	0.415554	-0.737126	-1.07256	-1.35893	+	Cluster -3	325	1.54915	0.0185464	sp|P10914|IRF1_HUMAN	P10914	IRF1_HUMAN	IRF1	Interferon regulatory factor 1
2.17534	0.122319	0.167962	-0.0458458	0.336758	0.153017	-0.550442	-1.1881	-1.171	+	Cluster -3	906	1.24105	0.0309398	sp|P22681|CBL_HUMAN	P22681	CBL_HUMAN	CBL	E3 ubiquitin-protein ligase CBL
2.17237	0.0926611	0.821488	-0.147265	-0.0014321	-0.342621	-0.522004	-0.901114	-1.17209	+	Cluster -3	155	1.51599	0.019519	sp|Q15649|ZNHI3_HUMAN	Q15649	ZNHI3_HUMAN	ZNHIT3	Zinc finger HIT domain-containing protein 3
2.08324	0.241111	0.452607	0.0460629	0.481378	-0.457904	-0.583364	-0.969665	-1.29346	+	Cluster -3	835	1.40219	0.0236211	sp|Q8N1G2|CMTR1_HUMAN	Q8N1G2	CMTR1_HUMAN	CMTR1	Cap-specific mRNA (nucleoside-2'-O-)-methyltransferase 1
1.99794	0.153797	0.68422	0.022681	0.298835	-0.451452	-0.187297	-1.3481	-1.17062	+	Cluster -3	691	1.33442	0.0263494	sp|P16452|EPB42_HUMAN	P16452	EPB42_HUMAN	EPB42	Protein 4.2
1.72454	0.12788	0.349209	0.198006	0.67288	-0.112374	-0.0651733	-1.14055	-1.75441	+	Cluster -3	2135	1.16495	0.0354184	sp|O43157|PLXB1_HUMAN	O43157	PLXB1_HUMAN	PLXNB1	Plexin-B1
1.29974	0.611695	0.714908	0.545563	0.353124	-0.0757704	-0.416718	-1.18045	-1.85209	+	Cluster -3	352	2.17298	0.00787716	sp|Q96BN8|OTUL_HUMAN	Q96BN8	OTUL_HUMAN	OTULIN	Ubiquitin thioesterase otulin
1.47505	0.263215	0.744228	0.396468	0.470239	-0.0681179	-0.207514	-1.37607	-1.69749	+	Cluster -3	90	1.71519	0.0147381	sp|Q49B96|COX19_HUMAN	Q49B96	COX19_HUMAN	COX19	Cytochrome c oxidase assembly protein COX19
1.57632	-0.227112	0.751991	0.105361	0.539781	0.245912	-0.190734	-0.864753	-1.93676	+	Cluster -3	870	1.16199	0.035595	sp|Q9UBT6|POLK_HUMAN	Q9UBT6	POLK_HUMAN	POLK	DNA polymerase kappa
1.41927	0.040223	0.751793	0.168712	0.613703	0.442732	-0.590729	-0.964717	-1.88099	+	Cluster -3	237	1.85032	0.0116627	sp|Q86UY6|NAA40_HUMAN	Q86UY6	NAA40_HUMAN	NAA40	N-alpha-acetyltransferase 40
1.16509	0.0163265	0.964168	0.138748	0.503532	0.499764	-0.740454	-0.437577	-2.10959	+	Cluster -3	966	1.55357	0.0184263	sp|O75170|PP6R2_HUMAN	O75170	PP6R2_HUMAN	PPP6R2	Serine/threonine-protein phosphatase 6 regulatory subunit 2
1.60347	0.19229	-0.108013	0.70636	1.13538	-0.552184	-0.588355	-0.985233	-1.40372	+	Cluster -3	4646	1.06175	0.0437047	sp|Q14204|DYHC1_HUMAN	Q14204	DYHC1_HUMAN	DYNC1H1	Cytoplasmic dynein 1 heavy chain 1
1.2902	0.712518	0.387023	0.569967	0.929562	-0.427759	-0.874954	-0.980801	-1.60576	+	Cluster -3	1742	2.0031	0.00971188	sp|Q9Y4F3|MARF1_HUMAN	Q9Y4F3	MARF1_HUMAN	MARF1	Meiosis regulator and mRNA stability factor 1
1.50792	0.614722	0.595057	0.181781	0.836549	-0.457096	-0.954216	-0.693451	-1.63126	+	Cluster -3	649	1.90828	0.0108419	sp|Q16643|DREB_HUMAN	Q16643	DREB_HUMAN	DBN1	Drebrin
1.84139	0.604477	0.124907	0.21542	0.586837	-0.299546	-1.06458	-0.458286	-1.55062	+	Cluster -3	805	1.4825	0.0207658	sp|O75410|TACC1_HUMAN	O75410	TACC1_HUMAN	TACC1	Transforming acidic coiled-coil-containing protein 1
1.7144	0.442839	0.339636	0.0296712	0.776549	-0.378538	-0.786443	-0.328138	-1.80998	+	Cluster -3	238	1.27362	0.0293402	sp|Q16629|SRSF7_HUMAN	Q16629	SRSF7_HUMAN	SRSF7	Serine/arginine-rich splicing factor 7
1.56204	0.695289	0.144266	0.47639	0.708531	-0.20316	-0.691295	-1.04264	-1.64941	+	Cluster -3	1649	1.84555	0.011819	sp|Q9P1Y6|PHRF1_HUMAN	Q9P1Y6	PHRF1_HUMAN	PHRF1	PHD and RING finger domain-containing protein 1
1.79327	0.534369	0.0968014	0.495984	0.564332	-0.0969982	-0.936758	-1.09478	-1.35622	+	Cluster -3	515	1.86908	0.0114665	sp|Q8WVX9|FACR1_HUMAN	Q8WVX9	FACR1_HUMAN	FAR1	Fatty acyl-CoA reductase 1
1.78749	0.137957	0.0798932	0.535724	0.53097	0.0920184	-0.510957	-0.86744	-1.78565	+	Cluster -3	396	1.33339	0.0264024	sp|O75177|CREST_HUMAN	O75177	CREST_HUMAN	SS18L1	Calcium-responsive transactivator
1.8209	0.43222	-0.0265774	0.317728	0.586211	0.0598376	-0.599262	-0.887636	-1.70342	+	Cluster -3	761	1.4419	0.0221709	sp|O43422|P52K_HUMAN	O43422	P52K_HUMAN	THAP12	52 kDa repressor of the inhibitor of the protein kinase
2.01897	0.269605	0.0261922	0.177766	0.21516	0.474238	-1.36475	-0.778304	-1.03888	+	Cluster -3	729	1.47018	0.0209933	sp|Q92560|BAP1_HUMAN	Q92560	BAP1_HUMAN	BAP1	Ubiquitin carboxyl-terminal hydrolase BAP1
2.00434	0.232394	0.0205679	0.230639	0.302864	0.431734	-1.33554	-1.07159	-0.81542	+	Cluster -3	320	1.50023	0.0201237	sp|Q96C36|P5CR2_HUMAN	Q96C36	P5CR2_HUMAN	PYCR2	Pyrroline-5-carboxylate reductase 2
1.88262	-0.166165	0.272112	0.581249	0.225542	0.514006	-1.2286	-1.15636	-0.924406	+	Cluster -3	657	1.54192	0.0187083	sp|Q6UVJ0|SAS6_HUMAN	Q6UVJ0	SAS6_HUMAN	SASS6	Spindle assembly abnormal protein 6 homolog
2.10394	-0.186822	0.0413458	0.42717	0.293332	0.38081	-1.04035	-1.04089	-0.97853	+	Cluster -3	1070	1.19527	0.0335771	sp|Q13308|PTK7_HUMAN	Q13308	PTK7_HUMAN	PTK7	Inactive tyrosine-protein kinase 7
2.0192	-0.231522	-0.0328116	0.372219	0.416594	0.550762	-0.908407	-0.954879	-1.23115	+	Cluster -3	1045	1.20056	0.0334313	sp|Q6PJG2|MDEAS_HUMAN	Q6PJG2	MDEAS_HUMAN	MIDEAS	Mitotic deacetylase-associated SANT domain protein
2.23681	0.156214	0.422899	-0.457049	-0.0955763	0.374161	-1.09842	-0.918808	-0.620224	+	Cluster -3	417	1.26601	0.0296522	sp|Q86VY4|TSYL5_HUMAN	Q86VY4	TSYL5_HUMAN	TSPYL5	Testis-specific Y-encoded-like protein 5
2.21518	0.228206	0.269136	-0.295165	-0.119743	0.480662	-0.732281	-1.08079	-0.965204	+	Cluster -3	483	1.28967	0.0286641	sp|Q9Y6V7|DDX49_HUMAN	Q9Y6V7	DDX49_HUMAN	DDX49	Probable ATP-dependent RNA helicase DDX49
1.99298	0.0229536	0.396173	-0.110244	0.0626493	0.757653	-0.916624	-1.03946	-1.16608	+	Cluster -3	535	1.44288	0.0221699	sp|Q9NZN3|EHD3_HUMAN	Q9NZN3	EHD3_HUMAN	EHD3	EH domain-containing protein 3
1.7471	0.200476	-0.295976	0.423772	0.449728	0.594963	-1.42877	-0.292286	-1.399	+	Cluster -3	657	1.22388	0.0320178	sp|Q96FV9|THOC1_HUMAN	Q96FV9	THOC1_HUMAN	THOC1	THO complex subunit 1
2.00973	0.265742	-0.380347	0.155891	0.670403	0.237258	-0.997056	-0.595095	-1.36653	+	Cluster -3	501	1.07414	0.042653	sp|Q12874|SF3A3_HUMAN	Q12874	SF3A3_HUMAN	SF3A3	Splicing factor 3A subunit 3
1.86944	0.475658	0.231621	-0.0289349	0.374863	0.37107	-1.23904	-0.639919	-1.41476	+	Cluster -3	2071	1.80664	0.0126875	sp|Q9P2D3|HTR5B_HUMAN	Q9P2D3	HTR5B_HUMAN	HEATR5B	HEAT repeat-containing protein 5B
1.92619	0.801446	-0.210627	-0.0694872	0.4188	0.184123	-1.30384	-0.587211	-1.15939	+	Cluster -3	453	1.41922	0.0230577	sp|Q92484|ASM3A_HUMAN	Q92484	ASM3A_HUMAN	SMPDL3A	Acid sphingomyelinase-like phosphodiesterase 3a
1.95264	0.823764	-0.285805	0.185901	0.175034	0.251162	-0.93728	-0.888262	-1.27716	+	Cluster -3	426	1.4651	0.0213531	sp|Q8WU90|ZC3HF_HUMAN	Q8WU90	ZC3HF_HUMAN	ZC3H15	Zinc finger CCCH domain-containing protein 15
1.90191	0.743381	-0.11058	0.00388522	0.379702	0.294395	-0.945717	-0.88541	-1.38156	+	Cluster -3	362	1.64422	0.0165056	sp|P55263|ADK_HUMAN	P55263	ADK_HUMAN	ADK	Adenosine kinase
1.57543	0.319495	0.327198	0.13233	0.202006	0.910519	-0.819917	-0.972967	-1.67409	+	Cluster -3	312	1.92131	0.0108021	sp|Q96P16|RPR1A_HUMAN	Q96P16	RPR1A_HUMAN	RPRD1A	Regulation of nuclear pre-mRNA domain-containing protein 1A
1.6948	0.243909	0.0259819	0.105475	0.530389	0.722607	-0.49399	-1.35654	-1.47263	+	Cluster -3	329	1.55942	0.018295	sp|Q7RTP0|NIPA1_HUMAN	Q7RTP0	NIPA1_HUMAN	NIPA1	Magnesium transporter NIPA1
1.70286	0.219455	0.0195266	0.374944	0.244885	0.794702	-0.563233	-1.42471	-1.36843	+	Cluster -3	3661	1.61222	0.0171437	sp|Q96Q15|SMG1_HUMAN	Q96Q15	SMG1_HUMAN	SMG1	Serine/threonine-protein kinase SMG1
1.62513	0.29222	0.127799	0.149321	0.446424	0.864001	-0.877362	-1.49735	-1.13019	+	Cluster -3	1231	1.94292	0.0106188	sp|Q8N3U4|STAG2_HUMAN	Q8N3U4	STAG2_HUMAN	STAG2	Cohesin subunit SA-2
1.50921	0.0875467	0.228862	0.528093	0.475037	0.788161	-0.875301	-1.44879	-1.29281	+	Cluster -3	530	2.21728	0.00717287	sp|Q9UKD1|GMEB2_HUMAN	Q9UKD1	GMEB2_HUMAN	GMEB2	Glucocorticoid modulatory element-binding protein 2
1.95804	0.0914726	-0.00521885	0.0824578	0.292368	0.760646	-0.852077	-1.00305	-1.32464	+	Cluster -3	567	1.3646	0.0250171	sp|Q9H6Z4|RANB3_HUMAN	Q9H6Z4	RANB3_HUMAN	RANBP3	Ran-binding protein 3
1.80146	0.152524	-0.380735	0.187659	0.464702	0.920143	-0.722462	-1.08799	-1.3353	+	Cluster -3	215	1.25546	0.0301343	sp|Q8IV50|LYSM2_HUMAN	Q8IV50	LYSM2_HUMAN	LYSMD2	LysM and putative peptidoglycan-binding domain-containing protein 2
[truncated: 2,907 more rows]

## Sheet: Global1
sample-12	sample-06	sample-04	sample-14	sample-07	sample-03	sample-09	sample-13	sample-01	C: ANOVA Significant	C: Cluster	N: Length	N: -Log ANOVA p value	N: ANOVA q-value	T: Protein	T: Protein ID	T: Entry Name	T: Gene	T: Protein Description
[truncated: 676 more rows]

[truncated: 5 more sheets: Gobal2, Global3, Global4, Global5, Global6]
