# Supplementary material for: Machine learning-assisted elucidation of CD81–CD44 interactions in promoting cancer stemness and extracellular vesicle integrity
Source: eLife. 2022 Oct 4;11:e82669. doi: 10.7554/eLife.82669 (PMC9581534; doi:10.7554/eLife.82669)
Supplement: Supplementary file 9. [file elife-82669-supp9.xlsx]

## Sheet: All
Identified Proteins (416)	Primary Protein Name	Ratio 44 +/-	P-value
Chloride intracellular channel protein 1 OS=Homo sapiens GN=CLIC1 PE=1 SV=4	O00299	1.18262	0.0022269
Cluster of Histone H1.3 OS=Homo sapiens GN=HIST1H1D PE=1 SV=2 (H13_HUMAN)	P16402	1.62566	0.00255189
CD44 antigen OS=Homo sapiens GN=CD44 PE=1 SV=3	P16070	#DIV/0!	0.00325967
Syntenin-1 OS=Homo sapiens GN=SDCBP PE=1 SV=1	O00560	1.80684	0.0106641
Melanotransferrin OS=Homo sapiens GN=MFI2 PE=1 SV=2	P08582	#DIV/0!	0.0114034
Choline transporter-like protein 2 OS=Homo sapiens GN=SLC44A2 PE=1 SV=3	Q53GD3	3.22054	0.0114583
Cluster of Ras-related protein Rab-10 OS=Homo sapiens GN=RAB10 PE=1 SV=1 (RAB10_HUMAN)	P61026	1.51719	0.0167085
Cluster of Nucleoside diphosphate kinase B OS=Homo sapiens GN=NME2 PE=1 SV=1 (NDKB_HUMAN)	P22392	0.526328	0.0181893
Adenosylhomocysteinase OS=Homo sapiens GN=AHCY PE=1 SV=4	O43865	0.477811	0.0186567
Myosin light polypeptide 6 OS=Homo sapiens GN=MYL6 PE=1 SV=2	P60660	0.538768	0.0191164
Cluster of Eukaryotic initiation factor 4A-I OS=Homo sapiens GN=EIF4A1 PE=1 SV=1 (IF4A1_HUMAN)	P60842	0.589512	0.0230737
Ras-related protein Rab-11B OS=Homo sapiens GN=RAB11B PE=1 SV=4	Q15907	0.255511	0.0254092
Annexin A6 OS=Homo sapiens GN=ANXA6 PE=1 SV=3	P08133	0.586485	0.0263924
Beta-2-microglobulin OS=Homo sapiens GN=B2M PE=1 SV=1	P61769	0.902192	0.027106
Tetraspanin-14 OS=Homo sapiens GN=TSPAN14 PE=1 SV=1	Q8NG11	3.0095	0.0274106
Sodium/potassium-transporting ATPase subunit beta-3 OS=Homo sapiens GN=ATP1B3 PE=1 SV=1	P54709	3.09057	0.0278318
14-3-3 protein sigma OS=Homo sapiens GN=SFN PE=1 SV=1	P31947	0.78072	0.0284184
Cluster of Fructose-bisphosphate aldolase A OS=Homo sapiens GN=ALDOA PE=1 SV=2 (ALDOA_HUMAN)	P04075	0.556167	0.0295327
Cluster of Ras-related protein Rap-1b OS=Homo sapiens GN=RAP1B PE=1 SV=1 (RAP1B_HUMAN)	P61224	1.60759	0.0297955
Urokinase plasminogen activator surface receptor OS=Homo sapiens GN=PLAUR PE=1 SV=1	Q03405	0.17149	0.0325944
Integrin alpha-2 OS=Homo sapiens GN=ITGA2 PE=1 SV=1	P17301	0.52611	0.0397399
Lymphocyte function-associated antigen 3 OS=Homo sapiens GN=CD58 PE=1 SV=1	P19256	1.68337	0.0402466
Raftlin OS=Homo sapiens GN=RFTN1 PE=1 SV=4	Q14699	2.05213	0.0414678
Serine protease HTRA1 OS=Homo sapiens GN=HTRA1 PE=1 SV=1	Q92743	5.36688	0.0427098
Ectonucleotide pyrophosphatase/phosphodiesterase family member 1 OS=Homo sapiens GN=ENPP1 PE=1 SV=2	P22413	0.171454	0.0450429
CD81 antigen OS=Homo sapiens GN=CD81 PE=1 SV=1	P60033	1.78687	0.0463298
Cluster of Sodium/potassium-transporting ATPase subunit alpha-1 OS=Homo sapiens GN=ATP1A1 PE=1 SV=1 (AT1A1_HUMAN)	P05023	0.819495	0.0482049
Barrier-to-autointegration factor OS=Homo sapiens GN=BANF1 PE=1 SV=1	O75531	7.99409	0.0499876
Niban-like protein 1 OS=Homo sapiens GN=FAM129B PE=1 SV=3	Q96TA1	1.22931	0.0513021
Integrin beta-3 OS=Homo sapiens GN=ITGB3 PE=1 SV=2		4.94515	0.0513205
CD9 antigen OS=Homo sapiens GN=CD9 PE=1 SV=4		0.729975	0.0517948
Cluster of Moesin OS=Homo sapiens GN=MSN PE=1 SV=3 (MOES_HUMAN)		0.728658	0.0518092
Brain acid soluble protein 1 OS=Homo sapiens GN=BASP1 PE=1 SV=2		0.74086	0.0551917
Cluster of Heat shock 70 kDa protein 1A OS=Homo sapiens GN=HSPA1A PE=1 SV=1 (HS71A_HUMAN)		1.36732	0.0563025
Tissue factor OS=Homo sapiens GN=F3 PE=1 SV=1		1.7693	0.0577572
Histone H2A.V OS=Homo sapiens GN=H2AFV PE=1 SV=3		2.8775	0.0615001
High affinity cationic amino acid transporter 1 OS=Homo sapiens GN=SLC7A1 PE=1 SV=1		2.87759	0.0615045
Annexin A5 OS=Homo sapiens GN=ANXA5 PE=1 SV=2		0.614462	0.0628398
Histone H4 OS=Homo sapiens GN=HIST1H4A PE=1 SV=2		1.87249	0.0638819
Vinculin OS=Homo sapiens GN=VCL PE=1 SV=4		3.00062	0.0641531
Cluster of GTPase HRas OS=Homo sapiens GN=HRAS PE=1 SV=1 (RASH_HUMAN)		1.64205	0.0661868
Peroxiredoxin-2 OS=Homo sapiens GN=PRDX2 PE=1 SV=5		0.555219	0.0680932
Cluster of Tubulin beta chain OS=Homo sapiens GN=TUBB PE=1 SV=2 (TBB5_HUMAN)		0.898819	0.0697259
L-lactate dehydrogenase B chain OS=Homo sapiens GN=LDHB PE=1 SV=2		0.381063	0.0712333
Cluster of Ras-related protein Ral-A OS=Homo sapiens GN=RALA PE=1 SV=1 (RALA_HUMAN)		1.97445	0.0724442
Cluster of Keratin, type II cytoskeletal 2 epidermal OS=Homo sapiens GN=KRT2 PE=1 SV=2 (K22E_HUMAN)		0.651258	0.0751739
CUB domain-containing protein 1 OS=Homo sapiens GN=CDCP1 PE=1 SV=3		0.954502	0.0805335
Cluster of Guanine nucleotide-binding protein G(i) subunit alpha-2 OS=Homo sapiens GN=GNAI2 PE=1 SV=3 (GNAI2_HUMAN)		1.19747	0.0841605
2',3'-cyclic-nucleotide 3'-phosphodiesterase OS=Homo sapiens GN=CNP PE=1 SV=2		1.60827	0.0855875
Cluster of Tubulin alpha-1C chain OS=Homo sapiens GN=TUBA1C PE=1 SV=1 (TBA1C_HUMAN)		0.799282	0.0869251
14-3-3 protein theta OS=Homo sapiens GN=YWHAQ PE=1 SV=1		0.752022	0.0878796
Cluster of Plastin-3 OS=Homo sapiens GN=PLS3 PE=1 SV=4 (PLST_HUMAN)		0.529273	0.0918945
CD82 antigen OS=Homo sapiens GN=CD82 PE=1 SV=1		#DIV/0!	0.0920495
F-actin-capping protein subunit beta OS=Homo sapiens GN=CAPZB PE=1 SV=4		3.18162	0.092735
Disks large homolog 1 OS=Homo sapiens GN=DLG1 PE=1 SV=2		#DIV/0!	0.0927588
Eukaryotic translation initiation factor 6 OS=Homo sapiens GN=EIF6 PE=1 SV=1		#DIV/0!	0.0928409
Golgi-associated plant pathogenesis-related protein 1 OS=Homo sapiens GN=GLIPR2 PE=1 SV=3		#DIV/0!	0.0928419
Cluster of Catenin alpha-1 OS=Homo sapiens GN=CTNNA1 PE=1 SV=1 (CTNA1_HUMAN)		#DIV/0!	0.0928419
Leukocyte surface antigen CD47 OS=Homo sapiens GN=CD47 PE=1 SV=1		#DIV/0!	0.0930236
40S ribosomal protein SA OS=Homo sapiens GN=RPSA PE=1 SV=4		0.351675	0.093077
Protein XRP2 OS=Homo sapiens GN=RP2 PE=1 SV=4		1.25333	0.0931014
GTP-binding protein SAR1a OS=Homo sapiens GN=SAR1A PE=1 SV=1		#DIV/0!	0.0950896
Heterogeneous nuclear ribonucleoproteins A2/B1 OS=Homo sapiens GN=HNRNPA2B1 PE=1 SV=2		#DIV/0!	0.0950896
Carbonyl reductase [NADPH] 1 OS=Homo sapiens GN=CBR1 PE=1 SV=3		#DIV/0!	0.0950896
Cluster of Histone H2B type 1-D OS=Homo sapiens GN=HIST1H2BD PE=1 SV=2 (H2B1D_HUMAN)		2.28926	0.0962282
Cluster of Histone H3.2 OS=Homo sapiens GN=HIST2H3A PE=1 SV=3 (H32_HUMAN)		1.63649	0.0993606
Long-chain-fatty-acid--CoA ligase 4 OS=Homo sapiens GN=ACSL4 PE=1 SV=2		12.9803	0.0994359
14-3-3 protein beta/alpha OS=Homo sapiens GN=YWHAB PE=1 SV=3		0.730139	0.100128
Triosephosphate isomerase OS=Homo sapiens GN=TPI1 PE=1 SV=3		0.590365	0.101179
Integrin alpha-V OS=Homo sapiens GN=ITGAV PE=1 SV=2		3.80977	0.101724
Rho-related GTP-binding protein RhoG OS=Homo sapiens GN=RHOG PE=1 SV=1		1.79279	0.104671
Transketolase OS=Homo sapiens GN=TKT PE=1 SV=3		4.00143	0.104703
Cluster of Poly(rC)-binding protein 1 OS=Homo sapiens GN=PCBP1 PE=1 SV=2 (PCBP1_HUMAN)		#DIV/0!	0.105532
Protein FAM49B OS=Homo sapiens GN=FAM49B PE=1 SV=1		#DIV/0!	0.105532
Hypoxanthine-guanine phosphoribosyltransferase OS=Homo sapiens GN=HPRT1 PE=1 SV=2		#DIV/0!	0.105532
Glutathione S-transferase P OS=Homo sapiens GN=GSTP1 PE=1 SV=2		#DIV/0!	0.105532
Cathepsin D OS=Homo sapiens GN=CTSD PE=1 SV=1		#DIV/0!	0.105534
Formin-like protein 1 OS=Homo sapiens GN=FMNL1 PE=1 SV=3		#DIV/0!	0.105534
Calpain small subunit 1 OS=Homo sapiens GN=CAPNS1 PE=1 SV=1		7.62214	0.108874
14-3-3 protein gamma OS=Homo sapiens GN=YWHAG PE=1 SV=2		0.696555	0.109034
EH domain-containing protein 2 OS=Homo sapiens GN=EHD2 PE=1 SV=2		#DIV/0!	0.110883
Nucleosome assembly protein 1-like 1 OS=Homo sapiens GN=NAP1L1 PE=1 SV=1		2.13867	0.111097
Histone H2A type 2-B OS=Homo sapiens GN=HIST2H2AB PE=1 SV=3		1.84264	0.111157
Annexin A3 OS=Homo sapiens GN=ANXA3 PE=1 SV=3		1.66	0.112154
Peptidyl-prolyl cis-trans isomerase A OS=Homo sapiens GN=PPIA PE=1 SV=2		1.21599	0.112322
Cluster of HLA class I histocompatibility antigen, B-41 alpha chain OS=Homo sapiens GN=HLA-B PE=1 SV=1 (1B41_HUMAN)		1.52391	0.112745
5'-nucleotidase OS=Homo sapiens GN=NT5E PE=1 SV=1		0.842118	0.113258
Niemann-Pick C1 protein OS=Homo sapiens GN=NPC1 PE=1 SV=2		2.23057	0.113403
Superoxide dismutase [Cu-Zn] OS=Homo sapiens GN=SOD1 PE=1 SV=2		3.00569	0.114631
T-complex protein 1 subunit eta OS=Homo sapiens GN=CCT7 PE=1 SV=2		0.29425	0.115006
Glycogen phosphorylase, brain form OS=Homo sapiens GN=PYGB PE=1 SV=5		0.245267	0.11586
Protein-glutamine gamma-glutamyltransferase 2 OS=Homo sapiens GN=TGM2 PE=1 SV=2		2.36723	0.116448
Actin-related protein 2/3 complex subunit 2 OS=Homo sapiens GN=ARPC2 PE=1 SV=1		3.09419	0.117041
Catenin beta-1 OS=Homo sapiens GN=CTNNB1 PE=1 SV=1		2.89643	0.117287
Calpain-2 catalytic subunit OS=Homo sapiens GN=CAPN2 PE=1 SV=6		2.81563	0.118113
Gelsolin OS=Homo sapiens GN=GSN PE=1 SV=1		6.01876	0.120271
Ras-related protein Rab-7a OS=Homo sapiens GN=RAB7A PE=1 SV=1		1.70512	0.120595
Phosphoglycerate kinase 1 OS=Homo sapiens GN=PGK1 PE=1 SV=3		0.729883	0.120757
Elongation factor 2 OS=Homo sapiens GN=EEF2 PE=1 SV=4		2.00106	0.12096
Monocarboxylate transporter 4 OS=Homo sapiens GN=SLC16A3 PE=1 SV=1		0.364188	0.12284
Transferrin receptor protein 1 OS=Homo sapiens GN=TFRC PE=1 SV=2		1.0368	0.123377
Protein S100-A16 OS=Homo sapiens GN=S100A16 PE=1 SV=1		0.544545	0.1267
Cluster of Histone H2A type 1-B/E OS=Homo sapiens GN=HIST1H2AB PE=1 SV=2 (H2A1B_HUMAN)		1.82691	0.126715
Elongation factor 1-delta OS=Homo sapiens GN=EEF1D PE=1 SV=5		#DIV/0!	0.126738
Elongation factor 1-alpha 1 OS=Homo sapiens GN=EEF1A1 PE=1 SV=1		1.25831	0.127295
Cluster of Guanine nucleotide-binding protein G(I)/G(S)/G(T) subunit beta-1 OS=Homo sapiens GN=GNB1 PE=1 SV=3 (GBB1_HUMAN)		1.15766	0.128589
14-3-3 protein eta OS=Homo sapiens GN=YWHAH PE=1 SV=4		0.951195	0.128789
Cluster of Core histone macro-H2A.1 OS=Homo sapiens GN=H2AFY PE=1 SV=4 (H2AY_HUMAN)		2.52176	0.128896
Keratin, type I cytoskeletal 9 OS=Homo sapiens GN=KRT9 PE=1 SV=3		0.602023	0.130707
Prothrombin OS=Homo sapiens GN=F2 PE=1 SV=2		2.89205	0.134055
Pyruvate kinase PKM OS=Homo sapiens GN=PKM PE=1 SV=4		0.813484	0.137943
Annexin A7 OS=Homo sapiens GN=ANXA7 PE=1 SV=3		3.81102	0.13931
Fermitin family homolog 2 OS=Homo sapiens GN=FERMT2 PE=1 SV=1		0.454261	0.14101
LIM and SH3 domain protein 1 OS=Homo sapiens GN=LASP1 PE=1 SV=2		2.13445	0.141182
Coronin-1C OS=Homo sapiens GN=CORO1C PE=1 SV=1		#DIV/0!	0.142436
Transaldolase OS=Homo sapiens GN=TALDO1 PE=1 SV=2		#DIV/0!	0.142436
Alpha-2-antiplasmin OS=Homo sapiens GN=SERPINF2 PE=1 SV=3		#DIV/0!	0.142736
IST1 homolog OS=Homo sapiens GN=IST1 PE=1 SV=1		0.745335	0.143439
Annexin A1 OS=Homo sapiens GN=ANXA1 PE=1 SV=2		0.795035	0.145051
Cluster of Keratin, type II cytoskeletal 8 OS=Homo sapiens GN=KRT8 PE=1 SV=7 (K2C8_HUMAN)		2.97755	0.14534
MARCKS-related protein OS=Homo sapiens GN=MARCKSL1 PE=1 SV=2		0.194169	0.146136
Cluster of Phosphoglycerate mutase 1 OS=Homo sapiens GN=PGAM1 PE=1 SV=2 (PGAM1_HUMAN)		0.748486	0.152201
60 kDa heat shock protein, mitochondrial OS=Homo sapiens GN=HSPD1 PE=1 SV=2		#DIV/0!	0.153636
Threonine--tRNA ligase, cytoplasmic OS=Homo sapiens GN=TARS PE=1 SV=3		#DIV/0!	0.153636
Ubiquitin-like modifier-activating enzyme 1 OS=Homo sapiens GN=UBA1 PE=1 SV=3		#DIV/0!	0.153636
Metalloproteinase inhibitor 3 OS=Homo sapiens GN=TIMP3 PE=1 SV=2		1.4665	0.155884
Cluster of Talin-1 OS=Homo sapiens GN=TLN1 PE=1 SV=3 (TLN1_HUMAN)		4.62327	0.156715
Glyceraldehyde-3-phosphate dehydrogenase OS=Homo sapiens GN=GAPDH PE=1 SV=3		0.707281	0.158053
14-3-3 protein epsilon OS=Homo sapiens GN=YWHAE PE=1 SV=1		0.868191	0.161865
Copine-1 OS=Homo sapiens GN=CPNE1 PE=1 SV=1		0.690349	0.164499
Retinoic acid-induced protein 3 OS=Homo sapiens GN=GPRC5A PE=1 SV=2		2.26648	0.164993
Proteolipid protein 2 OS=Homo sapiens GN=PLP2 PE=1 SV=1		1.3457	0.171821
Cluster of Cofilin-1 OS=Homo sapiens GN=CFL1 PE=1 SV=3 (COF1_HUMAN)		0.911903	0.172179
Cluster of Hemoglobin subunit delta OS=Homo sapiens GN=HBD PE=1 SV=2 (HBD_HUMAN)		1.38201	0.172678
Cluster of Serine/threonine-protein phosphatase PP1-gamma catalytic subunit OS=Homo sapiens GN=PPP1CC PE=1 SV=1 (PP1G_HUMAN)		3.08935	0.173361
Profilin-1 OS=Homo sapiens GN=PFN1 PE=1 SV=2		1.65513	0.173617
Annexin A4 OS=Homo sapiens GN=ANXA4 PE=1 SV=4		2.14984	0.175939
Cluster of Guanine nucleotide-binding protein subunit alpha-11 OS=Homo sapiens GN=GNA11 PE=1 SV=2 (GNA11_HUMAN)		1.9554	0.176306
78 kDa glucose-regulated protein OS=Homo sapiens GN=HSPA5 PE=1 SV=2		1.47313	0.176886
Ras-related protein R-Ras2 OS=Homo sapiens GN=RRAS2 PE=1 SV=1		1.55988	0.18085
Filamin-A OS=Homo sapiens GN=FLNA PE=1 SV=4		1.85232	0.183095
WD repeat-containing protein 1 OS=Homo sapiens GN=WDR1 PE=1 SV=4		1.82066	0.188534
Cluster of Keratin, type I cytoskeletal 10 OS=Homo sapiens GN=KRT10 PE=1 SV=6 (K1C10_HUMAN)		0.824078	0.188699
Serine incorporator 1 OS=Homo sapiens GN=SERINC1 PE=1 SV=1		1.78781	0.190525
Adenylyl cyclase-associated protein 1 OS=Homo sapiens GN=CAP1 PE=1 SV=5		0.753518	0.19173
6-phosphogluconate dehydrogenase, decarboxylating OS=Homo sapiens GN=PGD PE=1 SV=3		0.418082	0.1923
Rho GDP-dissociation inhibitor 1 OS=Homo sapiens GN=ARHGDIA PE=1 SV=3		2.27167	0.193756
Cluster of HLA class I histocompatibility antigen, A-2 alpha chain OS=Homo sapiens GN=HLA-A PE=1 SV=1 (1A02_HUMAN)		1.07399	0.197384
Ras-related protein Rap-2b OS=Homo sapiens GN=RAP2B PE=1 SV=1		1.2884	0.199798
Cluster of Transforming protein RhoA OS=Homo sapiens GN=RHOA PE=1 SV=1 (RHOA_HUMAN)		1.02771	0.202179
Integrin alpha-6 OS=Homo sapiens GN=ITGA6 PE=1 SV=5		1.23711	0.203743
Epithelial membrane protein 3 OS=Homo sapiens GN=EMP3 PE=1 SV=1		0.190631	0.203768
Serine protease 23 OS=Homo sapiens GN=PRSS23 PE=1 SV=1		0.426418	0.208897
Serum albumin OS=Homo sapiens GN=ALB PE=1 SV=2		1.17844	0.209911
Cell division control protein 42 homolog OS=Homo sapiens GN=CDC42 PE=1 SV=2		0.869134	0.209965
Intercellular adhesion molecule 1 OS=Homo sapiens GN=ICAM1 PE=1 SV=2		0.454839	0.210483
Nucleophosmin OS=Homo sapiens GN=NPM1 PE=1 SV=2		#DIV/0!	0.211325
Phosphatidylethanolamine-binding protein 1 OS=Homo sapiens GN=PEBP1 PE=1 SV=3		#DIV/0!	0.211325
DNA topoisomerase 1 OS=Homo sapiens GN=TOP1 PE=1 SV=2		0	0.211325
Alpha-soluble NSF attachment protein OS=Homo sapiens GN=NAPA PE=1 SV=3		#DIV/0!	0.211325
Clathrin light chain B OS=Homo sapiens GN=CLTB PE=1 SV=1		0	0.211325
40S ribosomal protein S18 OS=Homo sapiens GN=RPS18 PE=1 SV=3		#DIV/0!	0.211325
60S ribosomal protein L9 OS=Homo sapiens GN=RPL9 PE=1 SV=1		#DIV/0!	0.211325
60S ribosomal protein L14 OS=Homo sapiens GN=RPL14 PE=1 SV=4		0	0.211325
Macrophage-capping protein OS=Homo sapiens GN=CAPG PE=1 SV=2		#DIV/0!	0.211325
Heterogeneous nuclear ribonucleoprotein H OS=Homo sapiens GN=HNRNPH1 PE=1 SV=4		#DIV/0!	0.211325
Heterogeneous nuclear ribonucleoprotein A1 OS=Homo sapiens GN=HNRNPA1 PE=1 SV=5		#DIV/0!	0.211325
T-complex protein 1 subunit beta OS=Homo sapiens GN=CCT2 PE=1 SV=4		#DIV/0!	0.211325
Ataxin-7 OS=Homo sapiens GN=ATXN7 PE=1 SV=1		0	0.211325
Prelamin-A/C OS=Homo sapiens GN=LMNA PE=1 SV=1		#DIV/0!	0.211325
Flotillin-1 OS=Homo sapiens GN=FLOT1 PE=1 SV=3		#DIV/0!	0.211325
Receptor-type tyrosine-protein phosphatase eta OS=Homo sapiens GN=PTPRJ PE=1 SV=3		0.511871	0.212752
Fatty acid synthase OS=Homo sapiens GN=FASN PE=1 SV=3		0.657596	0.21277
Ribonuclease inhibitor OS=Homo sapiens GN=RNH1 PE=1 SV=2		2.66921	0.214264
Filamin-B OS=Homo sapiens GN=FLNB PE=1 SV=2		2.99623	0.223649
Proteasome activator complex subunit 1 OS=Homo sapiens GN=PSME1 PE=1 SV=1		3.69779	0.228895
Cluster of Actin, cytoplasmic 1 OS=Homo sapiens GN=ACTB PE=1 SV=1 (ACTB_HUMAN)		0.906537	0.231527
Neuron-specific calcium-binding protein hippocalcin OS=Homo sapiens GN=HPCA PE=1 SV=2		1.68755	0.231714
Cluster of Heat shock protein HSP 90-beta OS=Homo sapiens GN=HSP90AB1 PE=1 SV=4 (HS90B_HUMAN)		0.833731	0.23316
Tumor-associated calcium signal transducer 2 OS=Homo sapiens GN=TACSTD2 PE=1 SV=3		1.8025	0.233225
60S ribosomal protein L15 OS=Homo sapiens GN=RPL15 PE=1 SV=2		0.530691	0.237572
Transgelin-2 OS=Homo sapiens GN=TAGLN2 PE=1 SV=3		1.26957	0.24241
Cluster of Clathrin heavy chain 1 OS=Homo sapiens GN=CLTC PE=1 SV=5 (CLH1_HUMAN)		0.664045	0.243257
CD59 glycoprotein OS=Homo sapiens GN=CD59 PE=1 SV=1		0.788158	0.244126
F-actin-capping protein subunit alpha-1 OS=Homo sapiens GN=CAPZA1 PE=1 SV=3		2.96991	0.244447
Protein S100-A11 OS=Homo sapiens GN=S100A11 PE=1 SV=2		0.683441	0.244678
Annexin A2 OS=Homo sapiens GN=ANXA2 PE=1 SV=2		0.856603	0.24535
Integrin alpha-3 OS=Homo sapiens GN=ITGA3 PE=1 SV=5		1.10922	0.246942
Neuropilin-1 OS=Homo sapiens GN=NRP1 PE=1 SV=3		1.40414	0.248512
Cluster of Ras GTPase-activating-like protein IQGAP1 OS=Homo sapiens GN=IQGAP1 PE=1 SV=1 (IQGA1_HUMAN)		1.65794	0.250648
60S ribosomal protein L7a OS=Homo sapiens GN=RPL7A PE=1 SV=2		0.368148	0.252525
Guanine nucleotide-binding protein subunit alpha-13 OS=Homo sapiens GN=GNA13 PE=1 SV=2		1.22117	0.254415
Nicotinamide phosphoribosyltransferase OS=Homo sapiens GN=NAMPT PE=1 SV=1		1.69766	0.254673
Synaptosomal-associated protein 23 OS=Homo sapiens GN=SNAP23 PE=1 SV=1		2.19897	0.255292
Neutral amino acid transporter B(0) OS=Homo sapiens GN=SLC1A5 PE=1 SV=2		0.738409	0.257679
Glucose-6-phosphate isomerase OS=Homo sapiens GN=GPI PE=1 SV=4		1.37365	0.260161
Solute carrier family 2, facilitated glucose transporter member 1 OS=Homo sapiens GN=SLC2A1 PE=1 SV=2		0.877658	0.262846
Cluster of Plasma membrane calcium-transporting ATPase 1 OS=Homo sapiens GN=ATP2B1 PE=1 SV=3 (AT2B1_HUMAN)		1.50593	0.265971
Major vault protein OS=Homo sapiens GN=MVP PE=1 SV=4		0.443129	0.266435
Cluster of Epidermal growth factor receptor OS=Homo sapiens GN=EGFR PE=1 SV=2 (EGFR_HUMAN)		1.39372	0.266438
Cluster of Alpha-enolase OS=Homo sapiens GN=ENO1 PE=1 SV=2 (ENOA_HUMAN)		0.907497	0.267053
ATP-citrate synthase OS=Homo sapiens GN=ACLY PE=1 SV=3		1.53772	0.269925
Calmodulin OS=Homo sapiens GN=CALM1 PE=1 SV=2		0.696495	0.272067
Septin-2 OS=Homo sapiens GN=SEPT2 PE=1 SV=1		2.95897	0.27356
Protein disulfide-isomerase A3 OS=Homo sapiens GN=PDIA3 PE=1 SV=4		4.30147	0.284191
Fibronectin OS=Homo sapiens GN=FN1 PE=1 SV=4		0.655045	0.287414
Guanine nucleotide-binding protein G(s) subunit alpha isoforms XLas OS=Homo sapiens GN=GNAS PE=1 SV=2		1.22852	0.291911
Cluster of Tropomyosin alpha-4 chain OS=Homo sapiens GN=TPM4 PE=1 SV=3 (TPM4_HUMAN)		0.495302	0.293875
Destrin OS=Homo sapiens GN=DSTN PE=1 SV=3		1.42295	0.298193
Cluster of Rab GDP dissociation inhibitor beta OS=Homo sapiens GN=GDI2 PE=1 SV=2 (GDIB_HUMAN)		0.802943	0.30015
Charged multivesicular body protein 4b OS=Homo sapiens GN=CHMP4B PE=1 SV=1		1.11734	0.301594
GTP-binding nuclear protein Ran OS=Homo sapiens GN=RAN PE=1 SV=3		1.10699	0.302287
Solute carrier family 43 member 3 OS=Homo sapiens GN=SLC43A3 PE=1 SV=2		0.434847	0.303885
Protein S100-A4 OS=Homo sapiens GN=S100A4 PE=1 SV=1		0.530297	0.304068
Large neutral amino acids transporter small subunit 1 OS=Homo sapiens GN=SLC7A5 PE=1 SV=2		0.642195	0.308657
Programmed cell death 6-interacting protein OS=Homo sapiens GN=PDCD6IP PE=1 SV=1		1.58025	0.310656
Integrin beta-1 OS=Homo sapiens GN=ITGB1 PE=1 SV=2		0.922364	0.311811
Protein S100-A6 OS=Homo sapiens GN=S100A6 PE=1 SV=1		0.705095	0.312865
Integrin beta-5 OS=Homo sapiens GN=ITGB5 PE=1 SV=1		1.64392	0.318861
4F2 cell-surface antigen heavy chain OS=Homo sapiens GN=SLC3A2 PE=1 SV=3		0.862369	0.328669
Serine/threonine-protein phosphatase 2A 65 kDa regulatory subunit A alpha isoform OS=Homo sapiens GN=PPP2R1A PE=1 SV=4		0.739673	0.329168
Podocalyxin OS=Homo sapiens GN=PODXL PE=1 SV=2		1.50969	0.332641
14-3-3 protein zeta/delta OS=Homo sapiens GN=YWHAZ PE=1 SV=1		0.932844	0.338105
Galectin-1 OS=Homo sapiens GN=LGALS1 PE=1 SV=2		1.61721	0.338334
Hsp90 co-chaperone Cdc37 OS=Homo sapiens GN=CDC37 PE=1 SV=1		0.594425	0.339567
Transmembrane protein 59 OS=Homo sapiens GN=TMEM59 PE=1 SV=1		2.47226	0.340634
Calumenin OS=Homo sapiens GN=CALU PE=1 SV=2		1.73971	0.345421
Cluster of Alpha-2-macroglobulin OS=Homo sapiens GN=A2M PE=1 SV=3 (A2MG_HUMAN)		1.23282	0.346797
Cluster of Ras-related protein Rab-5C OS=Homo sapiens GN=RAB5C PE=1 SV=2 (RAB5C_HUMAN)		1.10887	0.347758
60S ribosomal protein L18a OS=Homo sapiens GN=RPL18A PE=1 SV=2		0.535703	0.348915
60S ribosomal protein L11 OS=Homo sapiens GN=RPL11 PE=1 SV=2		0.535703	0.348915
Cluster of ADP-ribosylation factor 1 OS=Homo sapiens GN=ARF1 PE=1 SV=2 (ARF1_HUMAN)		1.11153	0.351119
Cluster of Ephrin type-A receptor 2 OS=Homo sapiens GN=EPHA2 PE=1 SV=2 (EPHA2_HUMAN)		1.11027	0.351195
Keratin, type II cytoskeletal 1 OS=Homo sapiens GN=KRT1 PE=1 SV=6		0.930564	0.354842
EGF-like repeat and discoidin I-like domain-containing protein 3 OS=Homo sapiens GN=EDIL3 PE=1 SV=1		1.14171	0.355786
Elongation factor 1-gamma OS=Homo sapiens GN=EEF1G PE=1 SV=3		1.34564	0.355929
Cluster of Vimentin OS=Homo sapiens GN=VIM PE=1 SV=4 (VIME_HUMAN)		1.36014	0.358286
Vitronectin OS=Homo sapiens GN=VTN PE=1 SV=1		1.17382	0.361482
Malate dehydrogenase, cytoplasmic OS=Homo sapiens GN=MDH1 PE=1 SV=4		0.654423	0.36626
Neuroplastin OS=Homo sapiens GN=NPTN PE=1 SV=2		1.22885	0.368625
60S ribosomal protein L18 OS=Homo sapiens GN=RPL18 PE=1 SV=2		0.615197	0.370903
Cluster of L-lactate dehydrogenase A chain OS=Homo sapiens GN=LDHA PE=1 SV=2 (LDHA_HUMAN)		1.06372	0.371454
60S ribosomal protein L10 OS=Homo sapiens GN=RPL10 PE=1 SV=4		0.595231	0.373582
High mobility group protein HMG-I/HMG-Y OS=Homo sapiens GN=HMGA1 PE=1 SV=3		0.8061	0.374566
Equilibrative nucleoside transporter 1 OS=Homo sapiens GN=SLC29A1 PE=1 SV=3		1.15649	0.375405
Synaptic vesicle membrane protein VAT-1 homolog OS=Homo sapiens GN=VAT1 PE=1 SV=2		1.32937	0.378327
60S ribosomal protein L3 OS=Homo sapiens GN=RPL3 PE=1 SV=2		0.647715	0.380257
Basigin OS=Homo sapiens GN=BSG PE=1 SV=2		0.903134	0.380683
Peroxiredoxin-6 OS=Homo sapiens GN=PRDX6 PE=1 SV=3		1.78566	0.381909
Myristoylated alanine-rich C-kinase substrate OS=Homo sapiens GN=MARCKS PE=1 SV=4		1.07565	0.383842
60S ribosomal protein L7 OS=Homo sapiens GN=RPL7 PE=1 SV=1		0.703052	0.384166
Actin-related protein 3 OS=Homo sapiens GN=ACTR3 PE=1 SV=3		1.49051	0.384332
Galectin-3-binding protein OS=Homo sapiens GN=LGALS3BP PE=1 SV=1		1.15805	0.384665
Ubiquitin-60S ribosomal protein L40 OS=Homo sapiens GN=UBA52 PE=1 SV=2		0.886353	0.385555
Transitional endoplasmic reticulum ATPase OS=Homo sapiens GN=VCP PE=1 SV=4		0.744191	0.388987
Sequestosome-1 OS=Homo sapiens GN=SQSTM1 PE=1 SV=1		1.11889	0.391053
Heat shock cognate 71 kDa protein OS=Homo sapiens GN=HSPA8 PE=1 SV=1		0.963467	0.391105
Ferritin heavy chain OS=Homo sapiens GN=FTH1 PE=1 SV=2		1.75002	0.392581
Myoferlin OS=Homo sapiens GN=MYOF PE=1 SV=1		1.09478	0.393693
Nascent polypeptide-associated complex subunit alpha, muscle-specific form OS=Homo sapiens GN=NACA PE=1 SV=1		1.468	0.395899
Chloride intracellular channel protein 4 OS=Homo sapiens GN=CLIC4 PE=1 SV=4		0.874227	0.398767
Myeloid-associated differentiation marker OS=Homo sapiens GN=MYADM PE=1 SV=2		1.64814	0.402945
Integrin beta-4 OS=Homo sapiens GN=ITGB4 PE=1 SV=5		1.06596	0.404168
Protein S100-A10 OS=Homo sapiens GN=S100A10 PE=1 SV=2		0.931061	0.405999
Cluster of AP-2 complex subunit beta OS=Homo sapiens GN=AP2B1 PE=1 SV=1 (AP2B1_HUMAN)		0.714279	0.417937
Thrombospondin-1 OS=Homo sapiens GN=THBS1 PE=1 SV=2		1.22186	0.419052
Protein disulfide-isomerase A6 OS=Homo sapiens GN=PDIA6 PE=1 SV=1		0.714937	0.419367
60S ribosomal protein L6 OS=Homo sapiens GN=RPL6 PE=1 SV=3		0.713376	0.419844
40S ribosomal protein S3 OS=Homo sapiens GN=RPS3 PE=1 SV=2		0.715155	0.420355
Neuroblast differentiation-associated protein AHNAK OS=Homo sapiens GN=AHNAK PE=1 SV=2		1.18024	0.421128
Sodium/potassium-transporting ATPase subunit beta-1 OS=Homo sapiens GN=ATP1B1 PE=1 SV=1		0.93979	0.421135
Integrin alpha-5 OS=Homo sapiens GN=ITGA5 PE=1 SV=2		0.769279	0.421431
T-complex protein 1 subunit gamma OS=Homo sapiens GN=CCT3 PE=1 SV=4		1.42852	0.422392
Proteasome subunit alpha type-7 OS=Homo sapiens GN=PSMA7 PE=1 SV=1		0.715597	0.422961
Coagulation factor V OS=Homo sapiens GN=F5 PE=1 SV=4		1.11755	0.424901
Complement component 1 Q subcomponent-binding protein, mitochondrial OS=Homo sapiens GN=C1QBP PE=1 SV=1		1.43388	0.428353
40S ribosomal protein S7 OS=Homo sapiens GN=RPS7 PE=1 SV=1		1.43387	0.428354
40S ribosomal protein S4, X isoform OS=Homo sapiens GN=RPS4X PE=1 SV=2		1.43386	0.428356
Hemoglobin subunit alpha OS=Homo sapiens GN=HBA1 PE=1 SV=2		1.10547	0.42889
EH domain-containing protein 1 OS=Homo sapiens GN=EHD1 PE=1 SV=2		1.19838	0.429468
Inter-alpha-trypsin inhibitor heavy chain H2 OS=Homo sapiens GN=ITIH2 PE=1 SV=2		0.729194	0.436835
Junction plakoglobin OS=Homo sapiens GN=JUP PE=1 SV=3		0.826109	0.439615
Calnexin OS=Homo sapiens GN=CANX PE=1 SV=2		0.881271	0.442984
Copine-3 OS=Homo sapiens GN=CPNE3 PE=1 SV=1		0.894218	0.443054
Ras-related protein R-Ras OS=Homo sapiens GN=RRAS PE=1 SV=1		1.07315	0.443683
Cluster of Myosin-9 OS=Homo sapiens GN=MYH9 PE=1 SV=4 (MYH9_HUMAN)		0.894148	0.444839
Importin subunit beta-1 OS=Homo sapiens GN=KPNB1 PE=1 SV=2		1.19065	0.444876
Protein disulfide-isomerase OS=Homo sapiens GN=P4HB PE=1 SV=3		1.17267	0.446834
Complement C3 OS=Homo sapiens GN=C3 PE=1 SV=2		0.819558	0.449694
T-complex protein 1 subunit alpha OS=Homo sapiens GN=TCP1 PE=1 SV=1		1.15391	0.455298
Lactadherin OS=Homo sapiens GN=MFGE8 PE=1 SV=2		1.01272	0.45613
ADP-ribosylation factor 6 OS=Homo sapiens GN=ARF6 PE=1 SV=2		0.960307	0.456921
Annexin A11 OS=Homo sapiens GN=ANXA11 PE=1 SV=1		0.948762	0.462844
CD97 antigen OS=Homo sapiens GN=CD97 PE=1 SV=4		1.01103	0.463585
Unconventional myosin-Ic OS=Homo sapiens GN=MYO1C PE=1 SV=4		0.963338	0.467301
Cluster of Alpha-actinin-4 OS=Homo sapiens GN=ACTN4 PE=1 SV=2 (ACTN4_HUMAN)		0.94949	0.467518
Peroxiredoxin-1 OS=Homo sapiens GN=PRDX1 PE=1 SV=1		0.974699	0.467663
Protein CYR61 OS=Homo sapiens GN=CYR61 PE=1 SV=1		0.94501	0.467776
Cluster of Ras-related C3 botulinum toxin substrate 1 OS=Homo sapiens GN=RAC1 PE=1 SV=1 (RAC1_HUMAN)		0.993569	0.472569
Myosin regulatory light chain 12A OS=Homo sapiens GN=MYL12A PE=1 SV=2		1.10167	0.472708
Endoplasmin OS=Homo sapiens GN=HSP90B1 PE=1 SV=1		1.0488	0.474582
Multifunctional protein ADE2 OS=Homo sapiens GN=PAICS PE=1 SV=3		0.922764	0.476074
Actin-related protein 2/3 complex subunit 3 OS=Homo sapiens GN=ARPC3 PE=1 SV=3		0.949267	0.48018
60S ribosomal protein L12 OS=Homo sapiens GN=RPL12 PE=1 SV=1		1.07138	0.483948
Protein NDRG1 OS=Homo sapiens GN=NDRG1 PE=1 SV=1		0.972315	0.483952
Calreticulin OS=Homo sapiens GN=CALR PE=1 SV=1		1.05081	0.484217
T-complex protein 1 subunit theta OS=Homo sapiens GN=CCT8 PE=1 SV=4		1.0754	0.485179
Complement decay-accelerating factor OS=Homo sapiens GN=CD55 PE=1 SV=4		1.01272	0.48908
CD151 antigen OS=Homo sapiens GN=CD151 PE=1 SV=3		0.987379	0.489221
DnaJ homolog subfamily A member 1 OS=Homo sapiens GN=DNAJA1 PE=1 SV=2		1.01206	0.489497
ATP-dependent 6-phosphofructokinase, platelet type OS=Homo sapiens GN=PFKP PE=1 SV=2		0.993654	0.498201
40S ribosomal protein S8 OS=Homo sapiens GN=RPS8 PE=1 SV=2		1.00139	0.499372

## Sheet: 0.05
Supplementary file 9 (Table S5). Downregulated and upregulated proteins in CD44KO EVs
Identified Proteins	Protein ID	Ratio 44 WT/KO Evs	P-value
Downregulated in CD44KO EVs
CD44 antigen OS=Homo sapiens GN=CD44 PE=1 SV=3	P16070	#DIV/0!	0.00325967
Melanotransferrin OS=Homo sapiens GN=MFI2 PE=1 SV=2	P08582	#DIV/0!	0.0114034
Barrier-to-autointegration factor OS=Homo sapiens GN=BANF1 PE=1 SV=1	O75531	7.99409	0.0499876
Serine protease HTRA1 OS=Homo sapiens GN=HTRA1 PE=1 SV=1	Q92743	5.36688	0.0427098
Choline transporter-like protein 2 OS=Homo sapiens GN=SLC44A2 PE=1 SV=3	Q53GD3	3.22054	0.0114583
Sodium/potassium-transporting ATPase subunit beta-3 OS=Homo sapiens GN=ATP1B3 PE=1 SV=1	P54709	3.09057	0.0278318
Tetraspanin-14 OS=Homo sapiens GN=TSPAN14 PE=1 SV=1	Q8NG11	3.0095	0.0274106
Raftlin OS=Homo sapiens GN=RFTN1 PE=1 SV=4	Q14699	2.05213	0.0414678
Syntenin-1 OS=Homo sapiens GN=SDCBP PE=1 SV=1	O00560	1.80684	0.0106641
CD81 antigen OS=Homo sapiens GN=CD81 PE=1 SV=1	P60033	1.78687	0.0463298
Lymphocyte function-associated antigen 3 OS=Homo sapiens GN=CD58 PE=1 SV=1	P19256	1.68337	0.0402466
Cluster of Histone H1.3 OS=Homo sapiens GN=HIST1H1D PE=1 SV=2 (H13_HUMAN)	P16402	1.62566	0.00255189
Cluster of Ras-related protein Rap-1b OS=Homo sapiens GN=RAP1B PE=1 SV=1 (RAP1B_HUMAN)	P61224	1.60759	0.0297955
Cluster of Ras-related protein Rab-10 OS=Homo sapiens GN=RAB10 PE=1 SV=1 (RAB10_HUMAN)	P61026	1.51719	0.0167085
Chloride intracellular channel protein 1 OS=Homo sapiens GN=CLIC1 PE=1 SV=4	O00299	1.18262	0.0022269
Updregulated in CD44 KO Evs
Beta-2-microglobulin OS=Homo sapiens GN=B2M PE=1 SV=1	P61769	0.902192	0.027106
Cluster of Sodium/potassium-transporting ATPase subunit alpha-1 OS=Homo sapiens GN=ATP1A1 PE=1 SV=1 (AT1A1_HUMAN)	P05023	0.819495	0.0482049
14-3-3 protein sigma OS=Homo sapiens GN=SFN PE=1 SV=1	P31947	0.78072	0.0284184
Cluster of Eukaryotic initiation factor 4A-I OS=Homo sapiens GN=EIF4A1 PE=1 SV=1 (IF4A1_HUMAN)	P60842	0.589512	0.0230737
Annexin A6 OS=Homo sapiens GN=ANXA6 PE=1 SV=3	P08133	0.586485	0.0263924
Cluster of Fructose-bisphosphate aldolase A OS=Homo sapiens GN=ALDOA PE=1 SV=2 (ALDOA_HUMAN)	P04075	0.556167	0.0295327
Myosin light polypeptide 6 OS=Homo sapiens GN=MYL6 PE=1 SV=2	P60660	0.538768	0.0191164
Cluster of Nucleoside diphosphate kinase B OS=Homo sapiens GN=NME2 PE=1 SV=1 (NDKB_HUMAN)	P22392	0.526328	0.0181893
Integrin alpha-2 OS=Homo sapiens GN=ITGA2 PE=1 SV=1	P17301	0.52611	0.0397399
Adenosylhomocysteinase OS=Homo sapiens GN=AHCY PE=1 SV=4	O43865	0.477811	0.0186567
Ras-related protein Rab-11B OS=Homo sapiens GN=RAB11B PE=1 SV=4	Q15907	0.255511	0.0254092
Urokinase plasminogen activator surface receptor OS=Homo sapiens GN=PLAUR PE=1 SV=1	Q03405	0.17149	0.0325944
Ectonucleotide pyrophosphatase/phosphodiesterase family member 1 OS=Homo sapiens GN=ENPP1 PE=1 SV=2	P22413	0.171454	0.0450429

## Sheet: DOWN in KO
Identified Proteins (416)	Primary Protein Name	Ratio 44 +/-	P-value
Chloride intracellular channel protein 1 OS=Homo sapiens GN=CLIC1 PE=1 SV=4	O00299	1.18262	0.0022269
Cluster of Ras-related protein Rab-10 OS=Homo sapiens GN=RAB10 PE=1 SV=1 (RAB10_HUMAN)	P61026	1.51719	0.0167085
Cluster of Ras-related protein Rap-1b OS=Homo sapiens GN=RAP1B PE=1 SV=1 (RAP1B_HUMAN)	P61224	1.60759	0.0297955
Cluster of Histone H1.3 OS=Homo sapiens GN=HIST1H1D PE=1 SV=2 (H13_HUMAN)	P16402	1.62566	0.00255189
Lymphocyte function-associated antigen 3 OS=Homo sapiens GN=CD58 PE=1 SV=1	P19256	1.68337	0.0402466
CD81 antigen OS=Homo sapiens GN=CD81 PE=1 SV=1	P60033	1.78687	0.0463298
Syntenin-1 OS=Homo sapiens GN=SDCBP PE=1 SV=1	O00560	1.80684	0.0106641
Raftlin OS=Homo sapiens GN=RFTN1 PE=1 SV=4	Q14699	2.05213	0.0414678
Tetraspanin-14 OS=Homo sapiens GN=TSPAN14 PE=1 SV=1	Q8NG11	3.0095	0.0274106
Sodium/potassium-transporting ATPase subunit beta-3 OS=Homo sapiens GN=ATP1B3 PE=1 SV=1	P54709	3.09057	0.0278318
Choline transporter-like protein 2 OS=Homo sapiens GN=SLC44A2 PE=1 SV=3	Q53GD3	3.22054	0.0114583
Serine protease HTRA1 OS=Homo sapiens GN=HTRA1 PE=1 SV=1	Q92743	5.36688	0.0427098
Barrier-to-autointegration factor OS=Homo sapiens GN=BANF1 PE=1 SV=1	O75531	7.99409	0.0499876
CD44 antigen OS=Homo sapiens GN=CD44 PE=1 SV=3	P16070	#DIV/0!	0.00325967
Melanotransferrin OS=Homo sapiens GN=MFI2 PE=1 SV=2	P08582	#DIV/0!	0.0114034

## Sheet: Up in KO
Identified Proteins (416)	Primary Protein Name	Ratio 44 +/-	P-value
Ectonucleotide pyrophosphatase/phosphodiesterase family member 1 OS=Homo sapiens GN=ENPP1 PE=1 SV=2	P22413	0.171454	0.0450429
Urokinase plasminogen activator surface receptor OS=Homo sapiens GN=PLAUR PE=1 SV=1	Q03405	0.17149	0.0325944
Ras-related protein Rab-11B OS=Homo sapiens GN=RAB11B PE=1 SV=4	Q15907	0.255511	0.0254092
Adenosylhomocysteinase OS=Homo sapiens GN=AHCY PE=1 SV=4	O43865	0.477811	0.0186567
Integrin alpha-2 OS=Homo sapiens GN=ITGA2 PE=1 SV=1	P17301	0.52611	0.0397399
Cluster of Nucleoside diphosphate kinase B OS=Homo sapiens GN=NME2 PE=1 SV=1 (NDKB_HUMAN)	P22392	0.526328	0.0181893
Myosin light polypeptide 6 OS=Homo sapiens GN=MYL6 PE=1 SV=2	P60660	0.538768	0.0191164
Cluster of Fructose-bisphosphate aldolase A OS=Homo sapiens GN=ALDOA PE=1 SV=2 (ALDOA_HUMAN)	P04075	0.556167	0.0295327
Annexin A6 OS=Homo sapiens GN=ANXA6 PE=1 SV=3	P08133	0.586485	0.0263924
Cluster of Eukaryotic initiation factor 4A-I OS=Homo sapiens GN=EIF4A1 PE=1 SV=1 (IF4A1_HUMAN)	P60842	0.589512	0.0230737
14-3-3 protein sigma OS=Homo sapiens GN=SFN PE=1 SV=1	P31947	0.78072	0.0284184
Cluster of Sodium/potassium-transporting ATPase subunit alpha-1 OS=Homo sapiens GN=ATP1A1 PE=1 SV=1 (AT1A1_HUMAN)	P05023	0.819495	0.0482049
Beta-2-microglobulin OS=Homo sapiens GN=B2M PE=1 SV=1	P61769	0.902192	0.027106
