# Supplementary figures and images for: Machine learning-assisted elucidation of CD81–CD44 interactions in promoting cancer stemness and extracellular vesicle integrity
Source: eLife journal article supplement (doi:10.7554/elife.82669), 2022-09-30

Figure 1- figure supplement 1

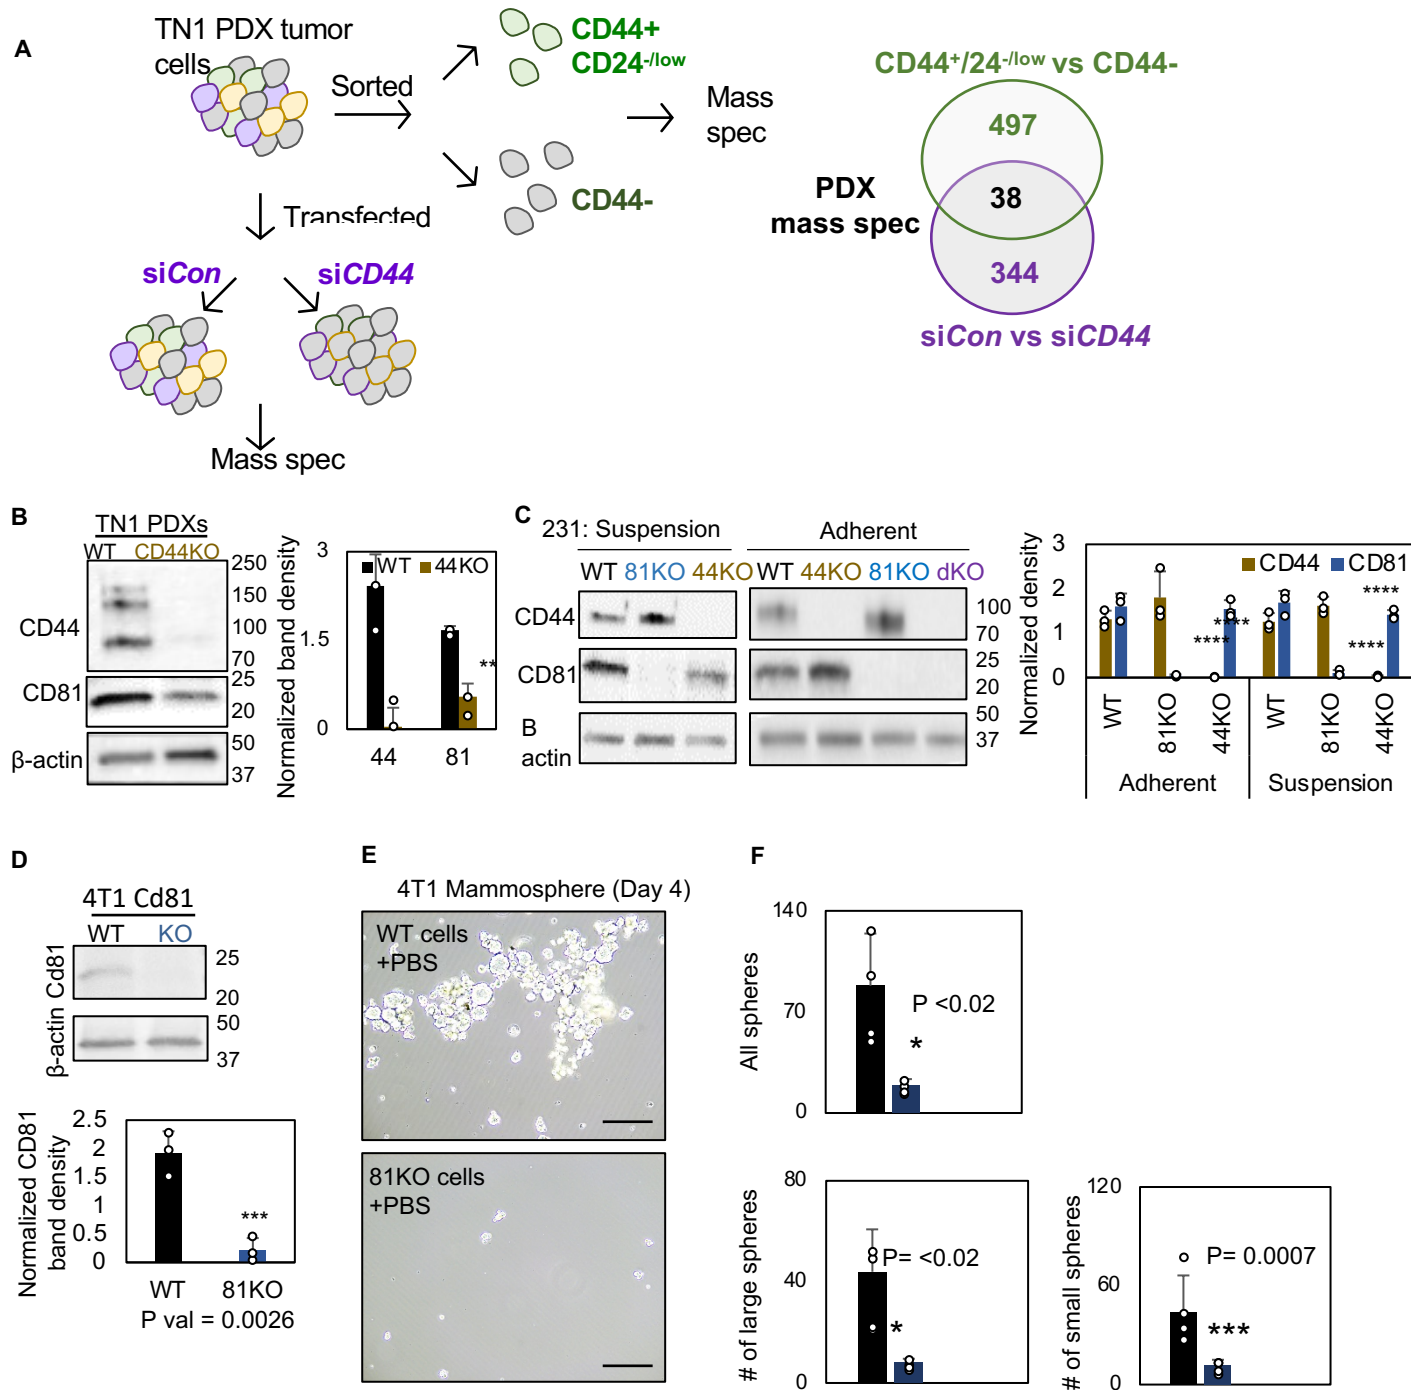

Supplement: supp [file elife_poa_e82669_Figure_1_figure_supplement_1.pdf › elife_poa_e82669_Figure_1_figure_supplement_1.pdf]

Figure 1- figure supplement 2

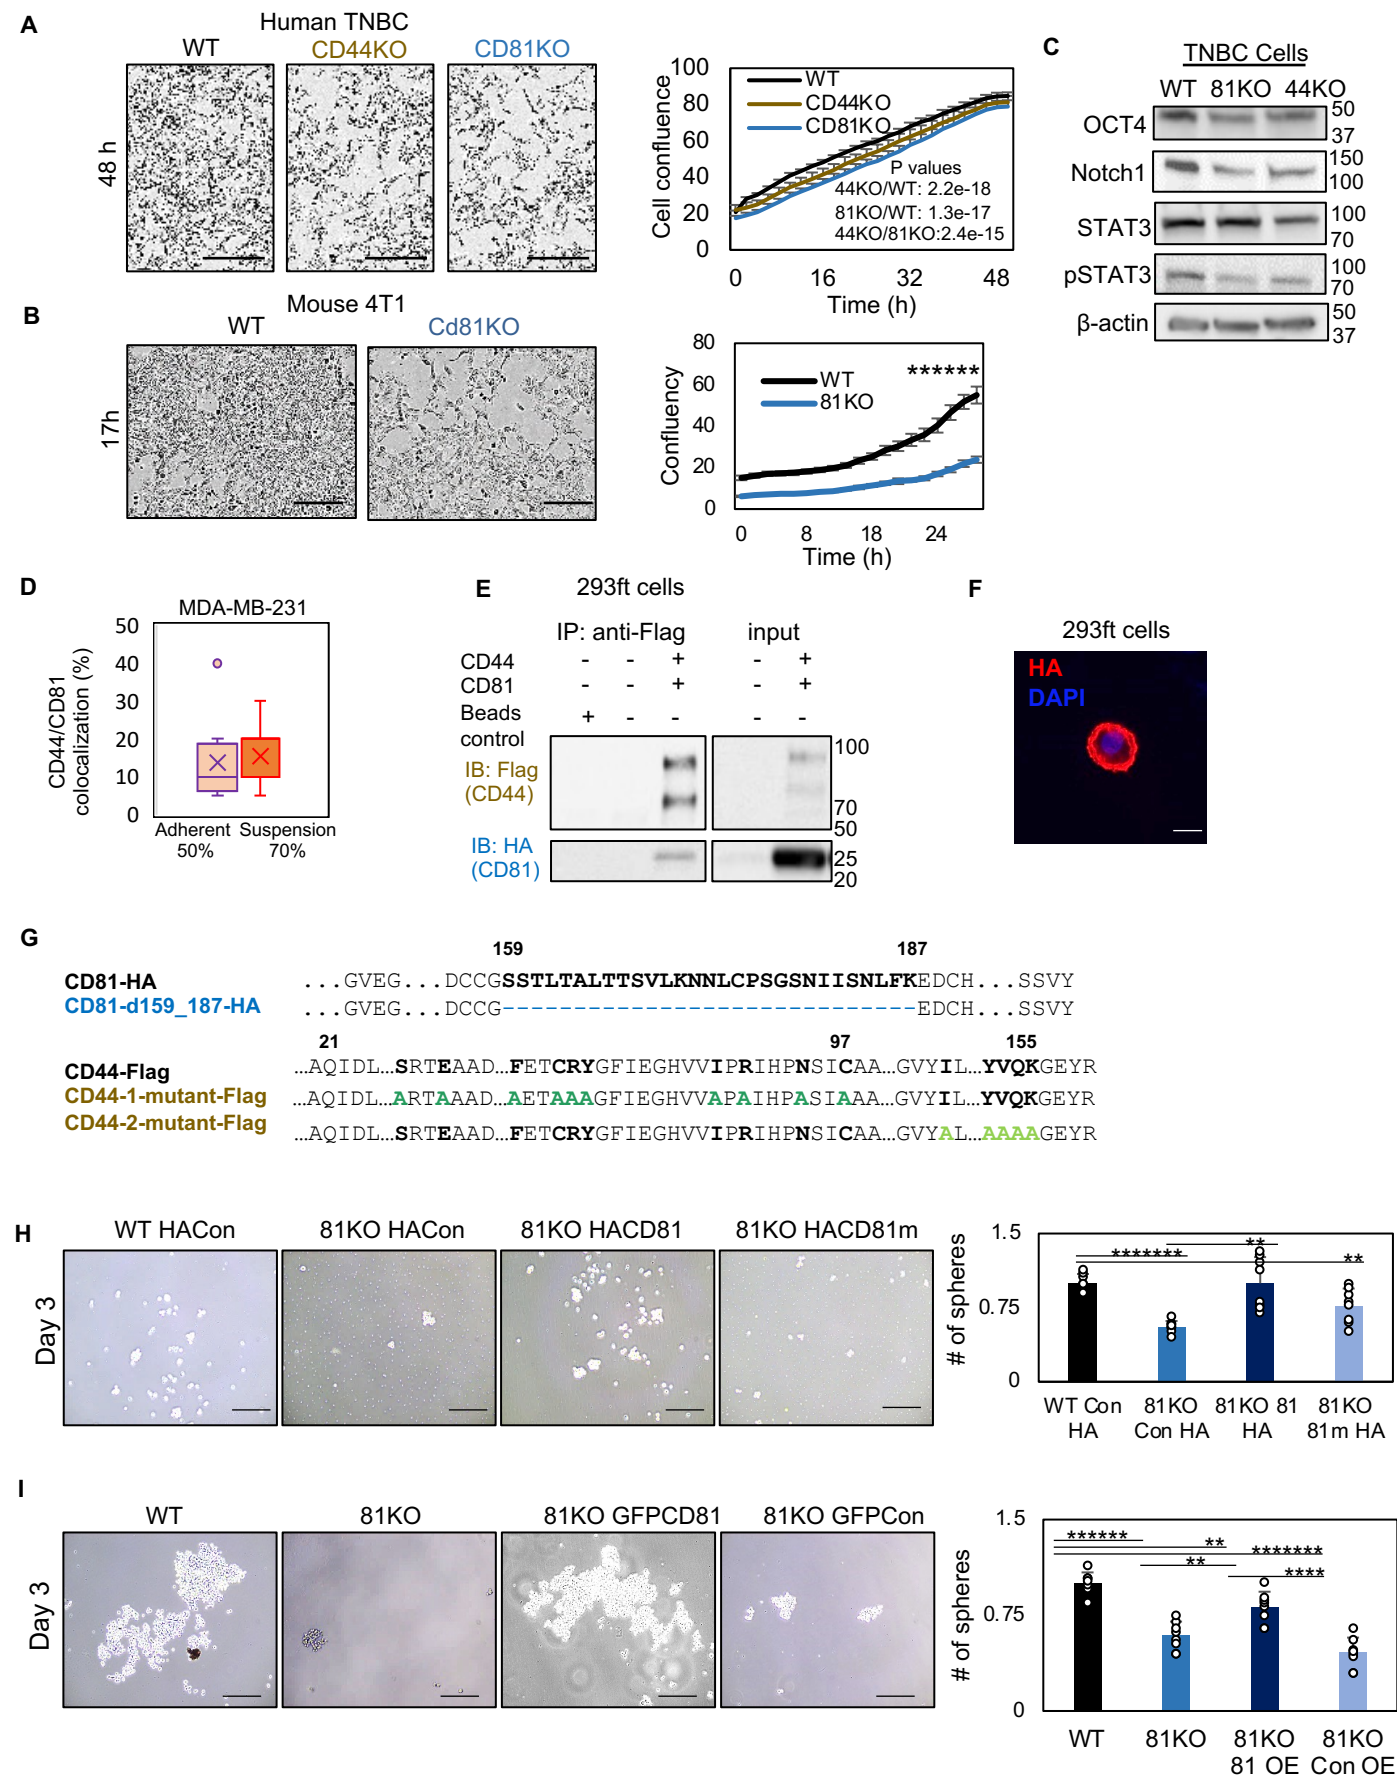

Supplement: supp [file elife_poa_e82669_Figure_1_figure_supplement_2.pdf › elife_poa_e82669_Figure_1_figure_supplement_2.pdf]

Figure 2-figure supplement 1

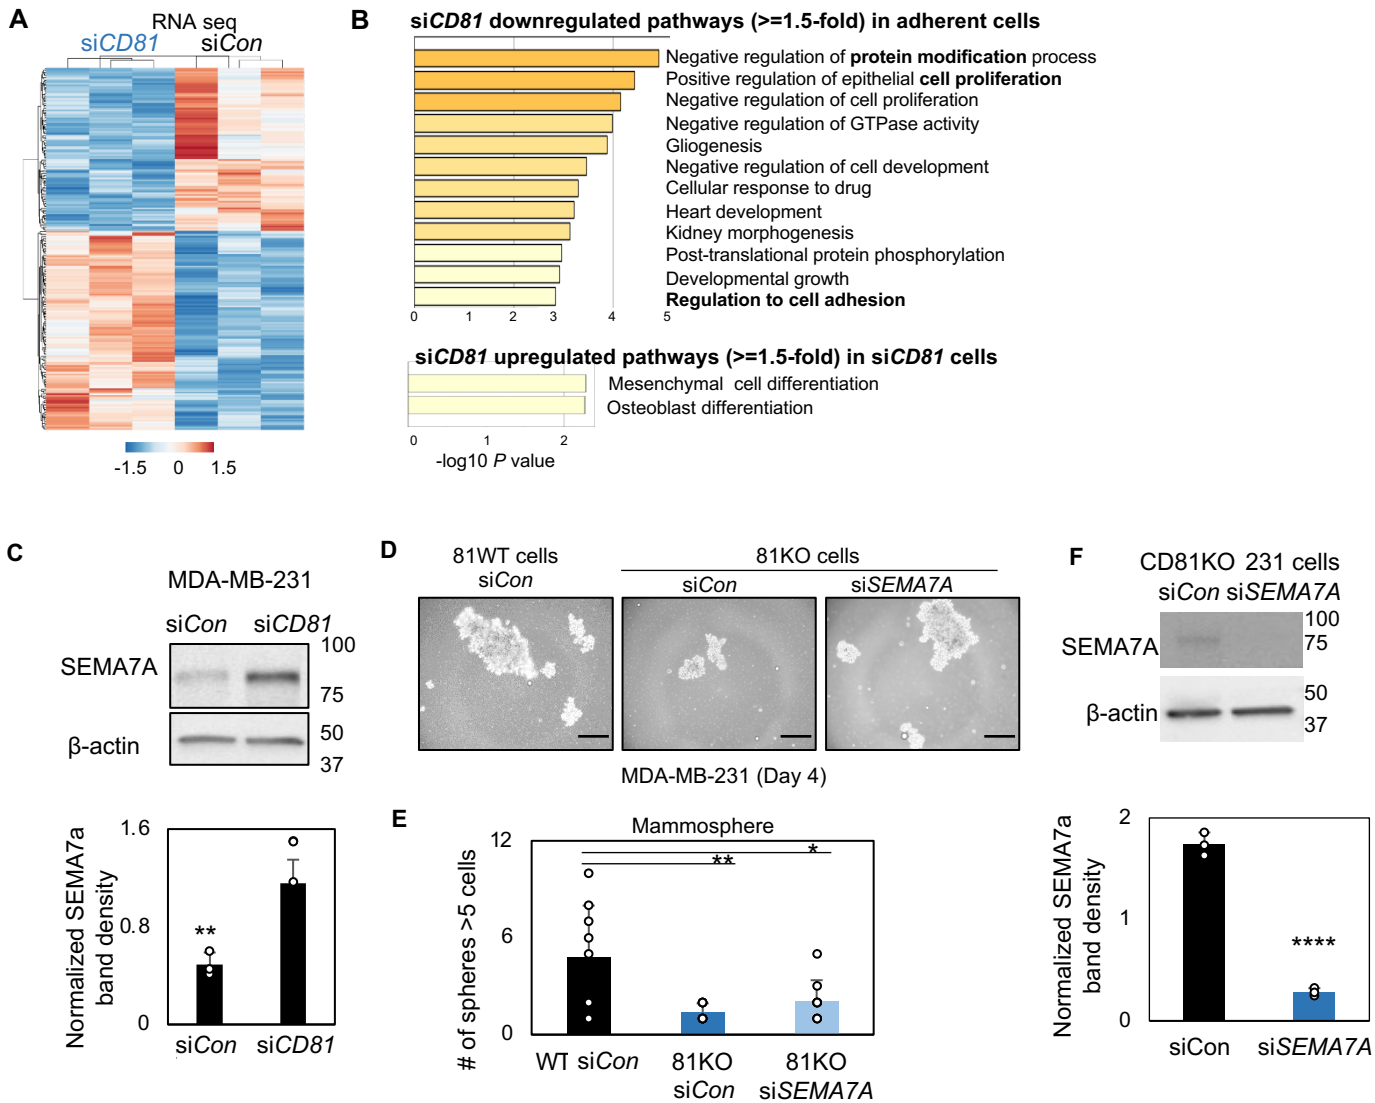

Supplement: supp [file elife_poa_e82669_Figure_2_figure_supplement_1.pdf › elife_poa_e82669_Figure_2_figure_supplement_1.pdf]

**Figure 2- figure supplement 2**

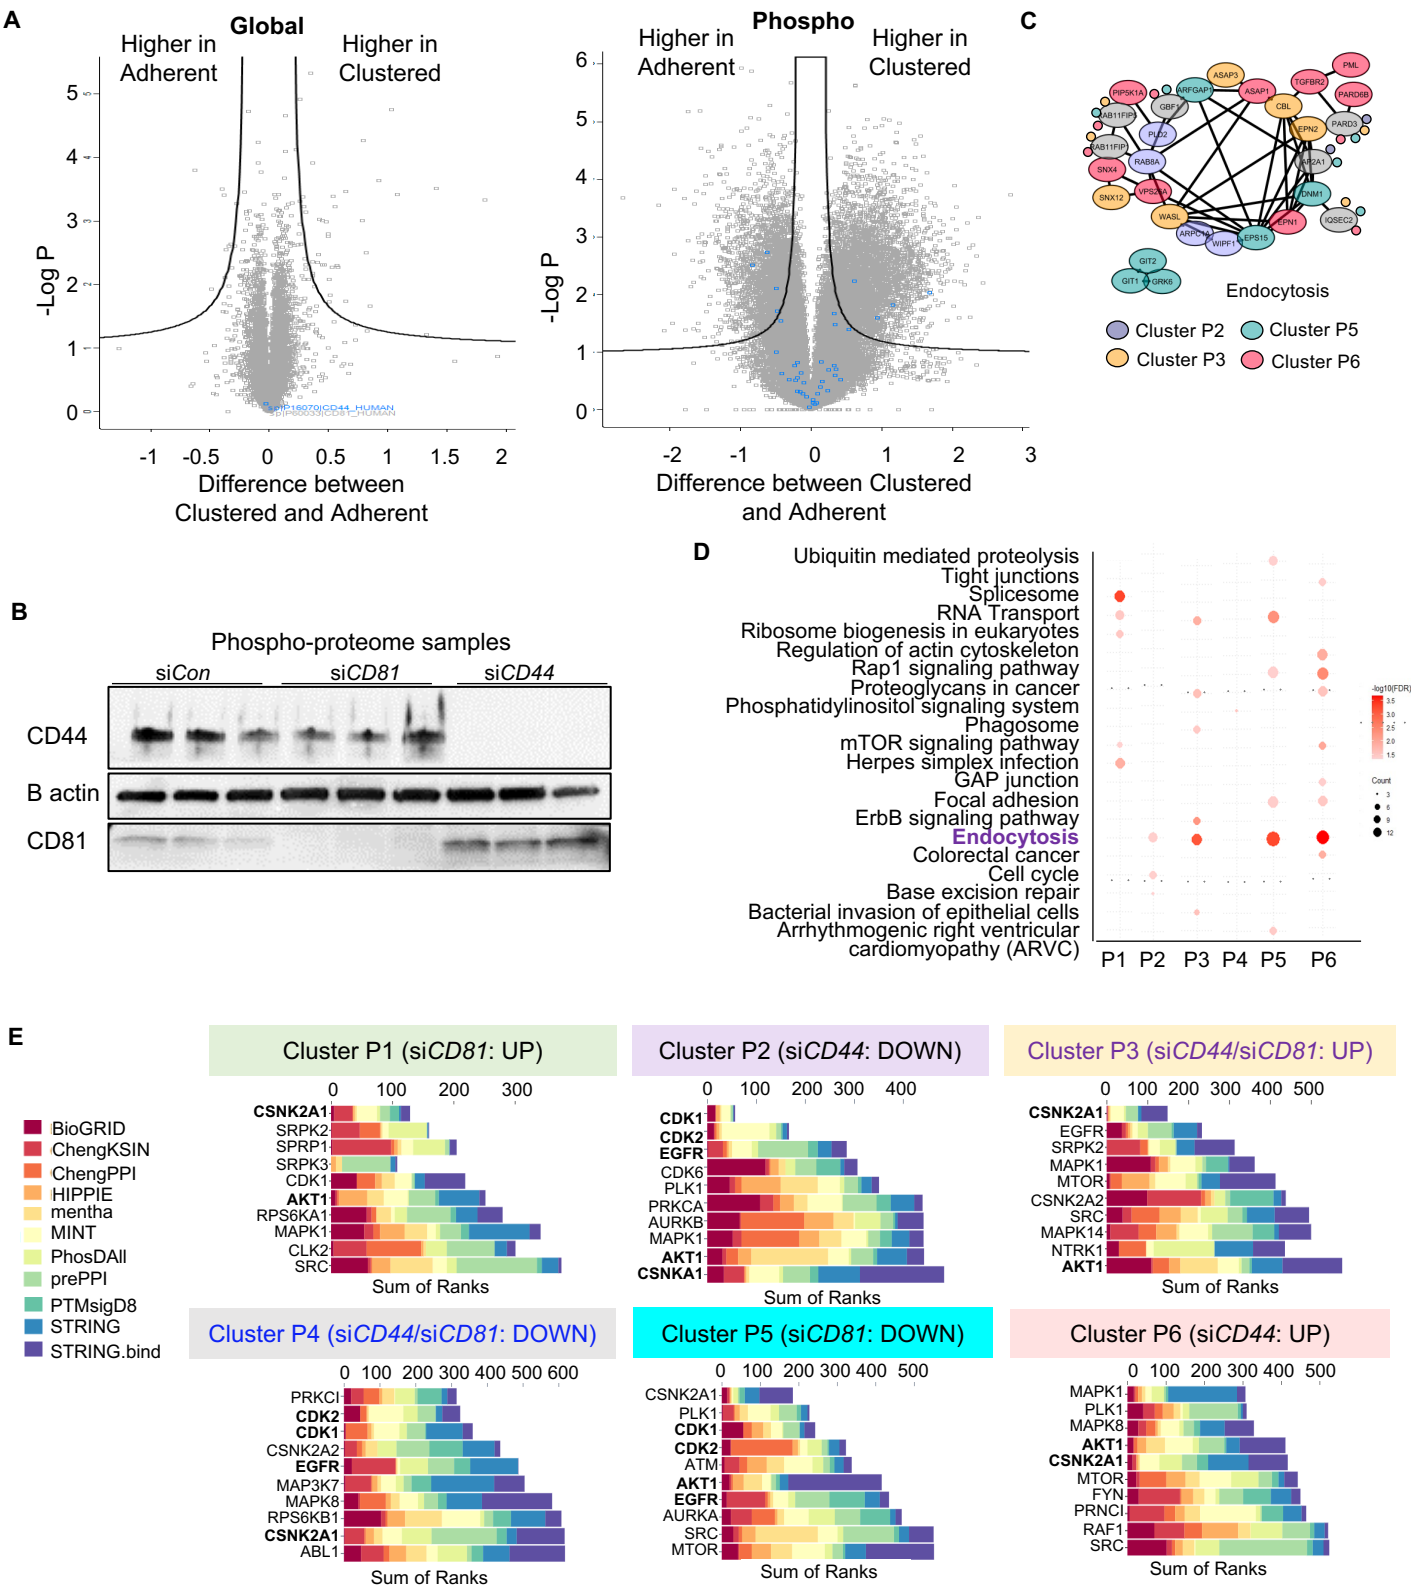

Supplement: supp [file elife_poa_e82669_Figure_2_figure_supplement_2.pdf › elife_poa_e82669_Figure_2_figure_supplement_2.pdf]

**Figure 2- figure supplement 3**

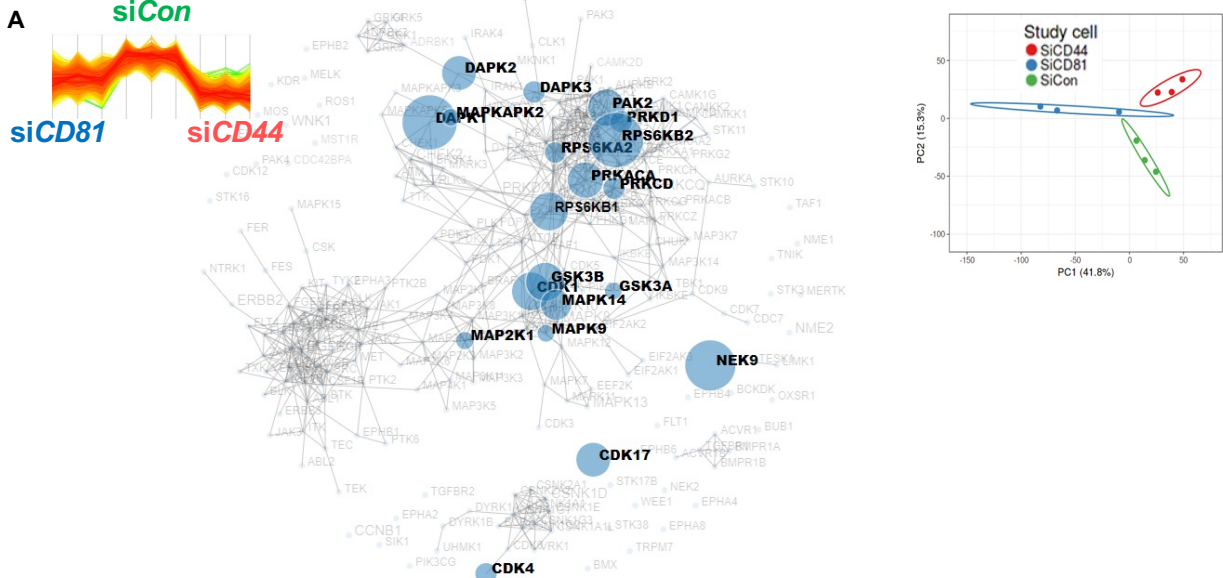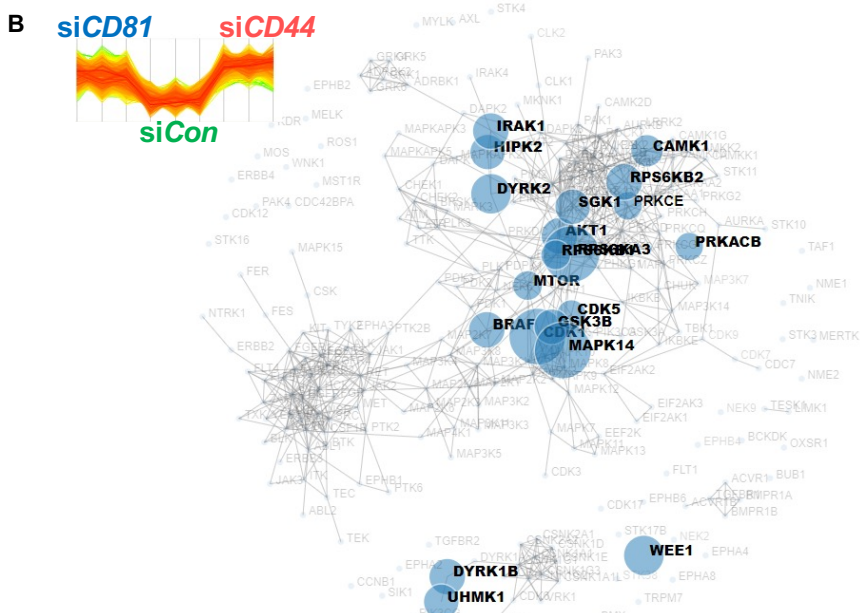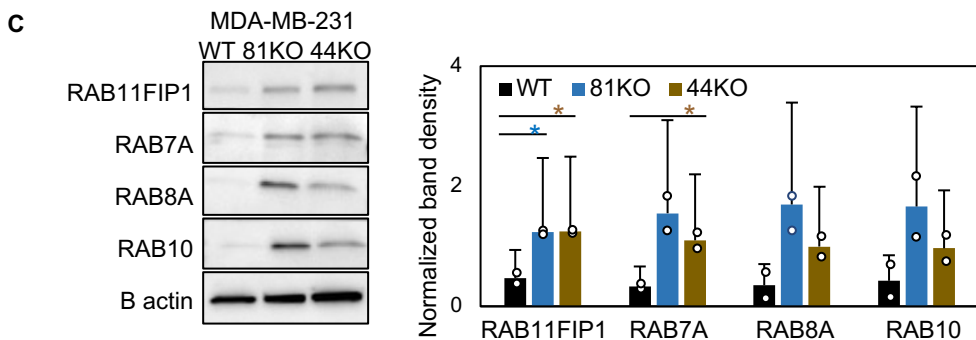

Supplement: supp [file elife_poa_e82669_Figure_2_figure_supplement_3.pdf › elife_poa_e82669_Figure_2_figure_supplement_3.pdf]

Figure 3- figure supplement 1

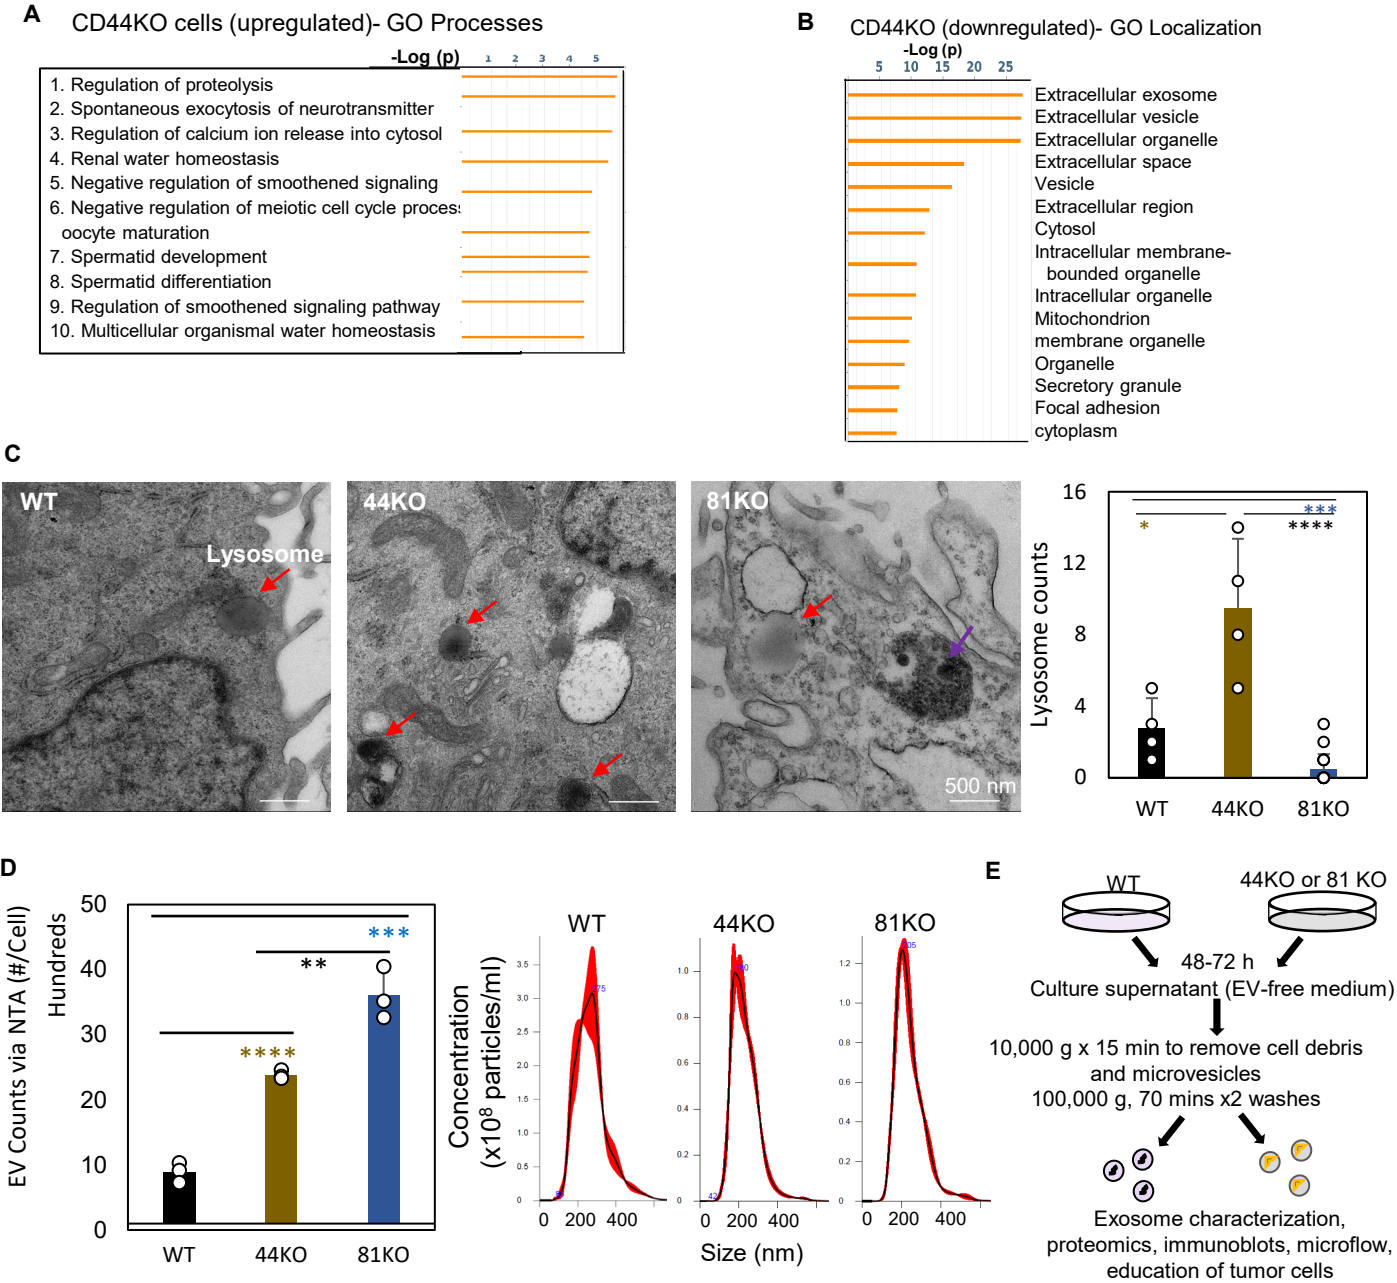

Supplement: supp [file elife_poa_e82669_Figure_3_figure_supplement_1.pdf › elife_poa_e82669_Figure_3_figure_supplement_1.pdf]

Figure 3- figure supplement 2

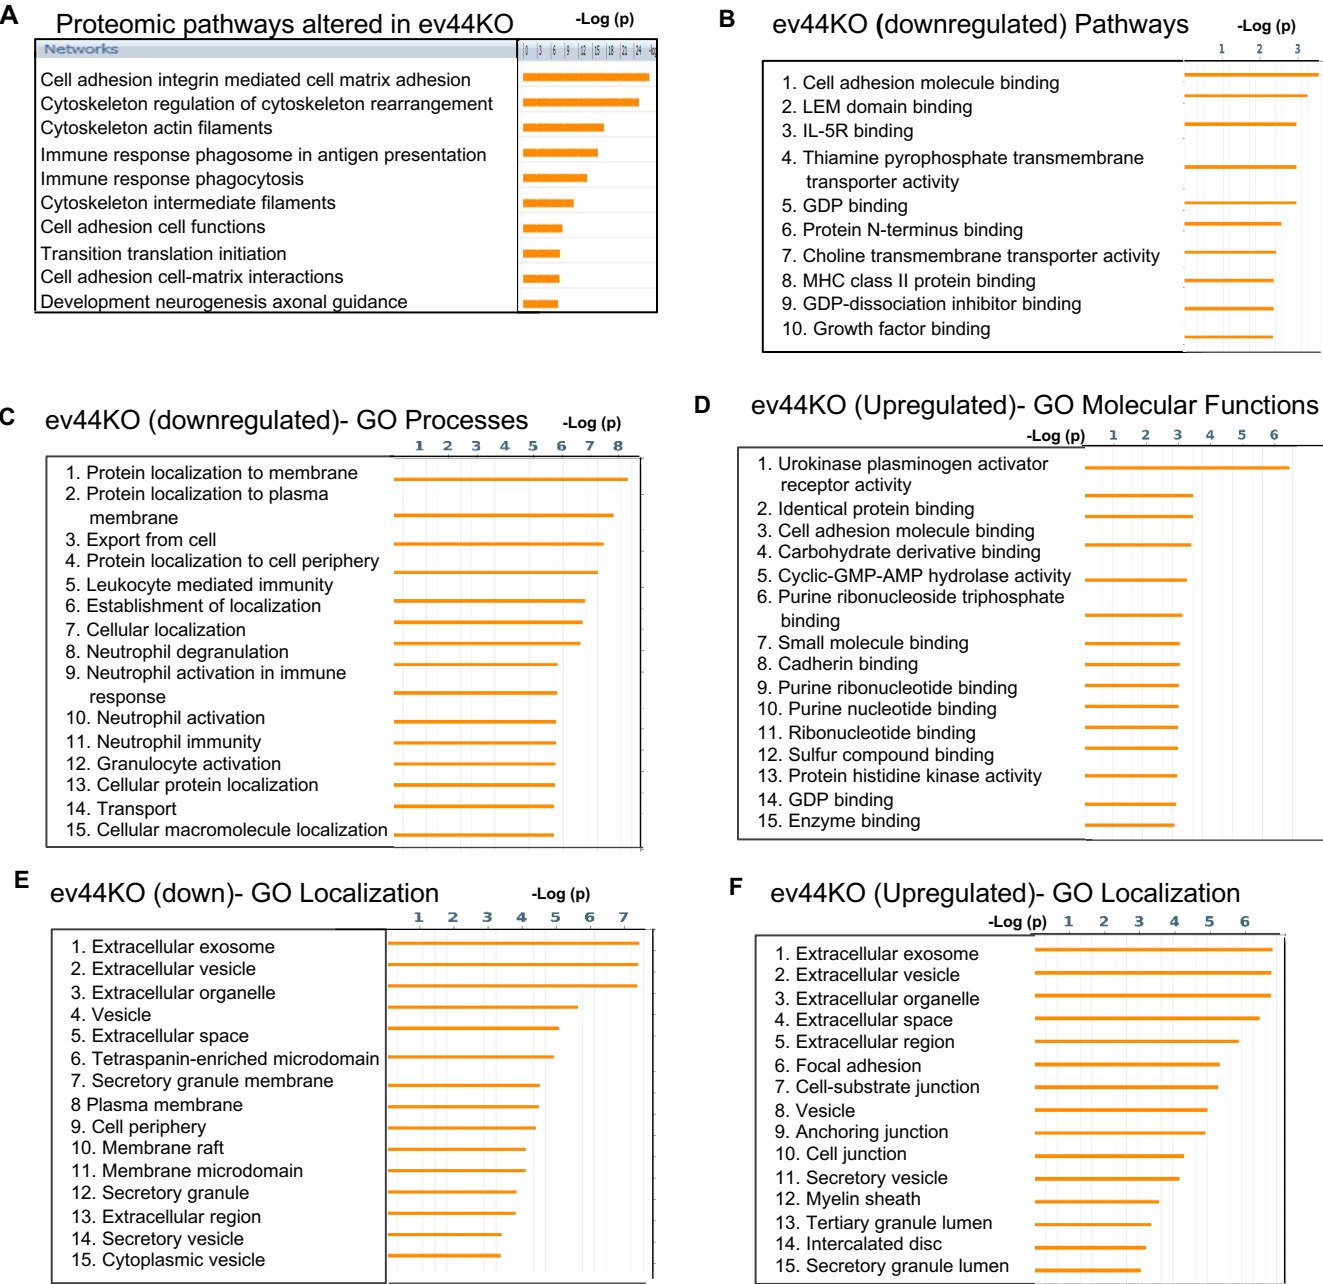

Supplement: supp [file elife_poa_e82669_Figure_3_figure_supplement_2.pdf › elife_poa_e82669_Figure_3_figure_supplement_2.pdf]

Figure 3- figure supplement 3

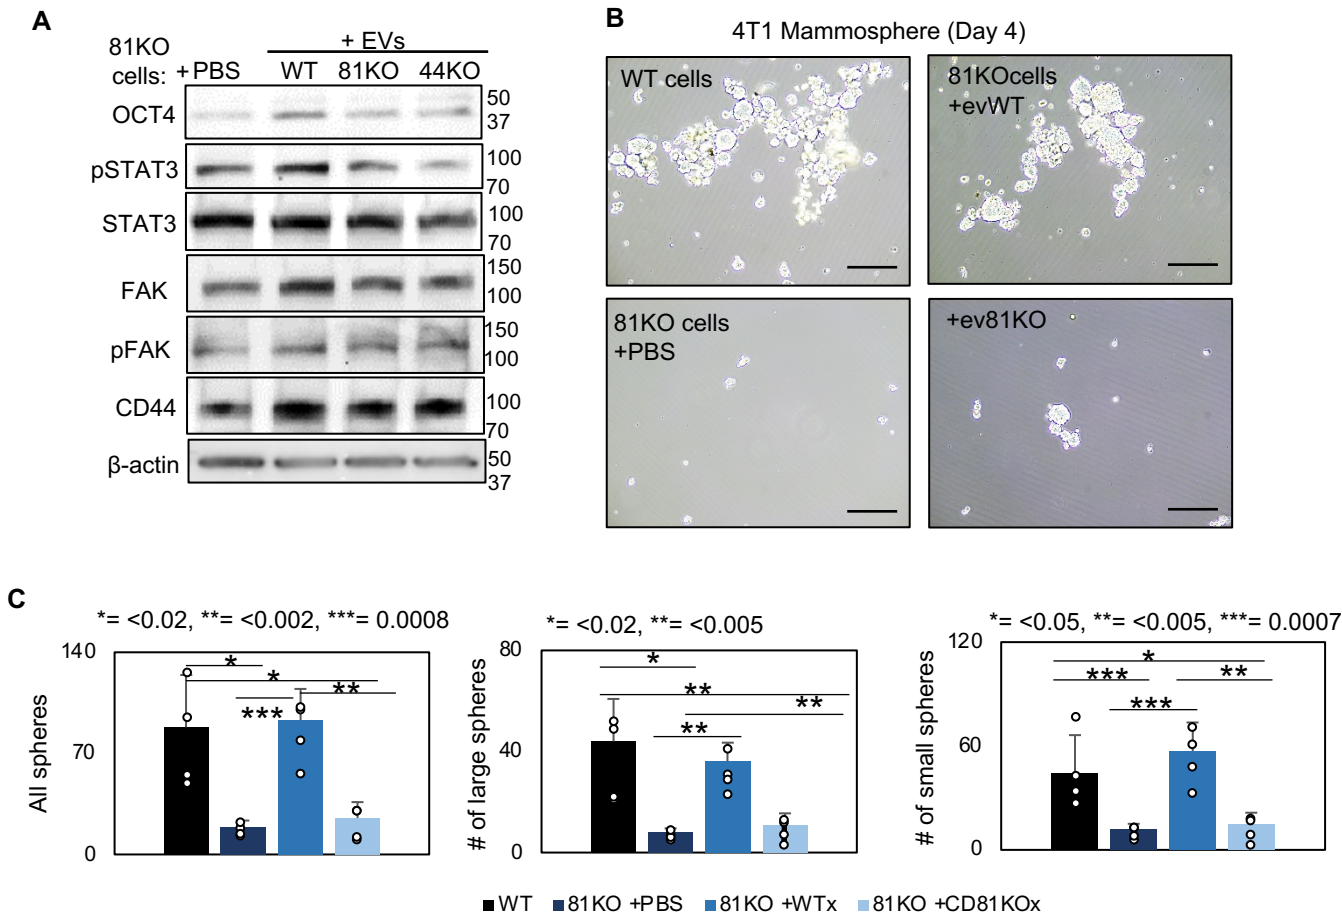

Supplement: supp [file elife_poa_e82669_Figure_3_figure_supplement_3.pdf › elife_poa_e82669_Figure_3_figure_supplement_3.pdf]

Figure 4- figure supplement 1

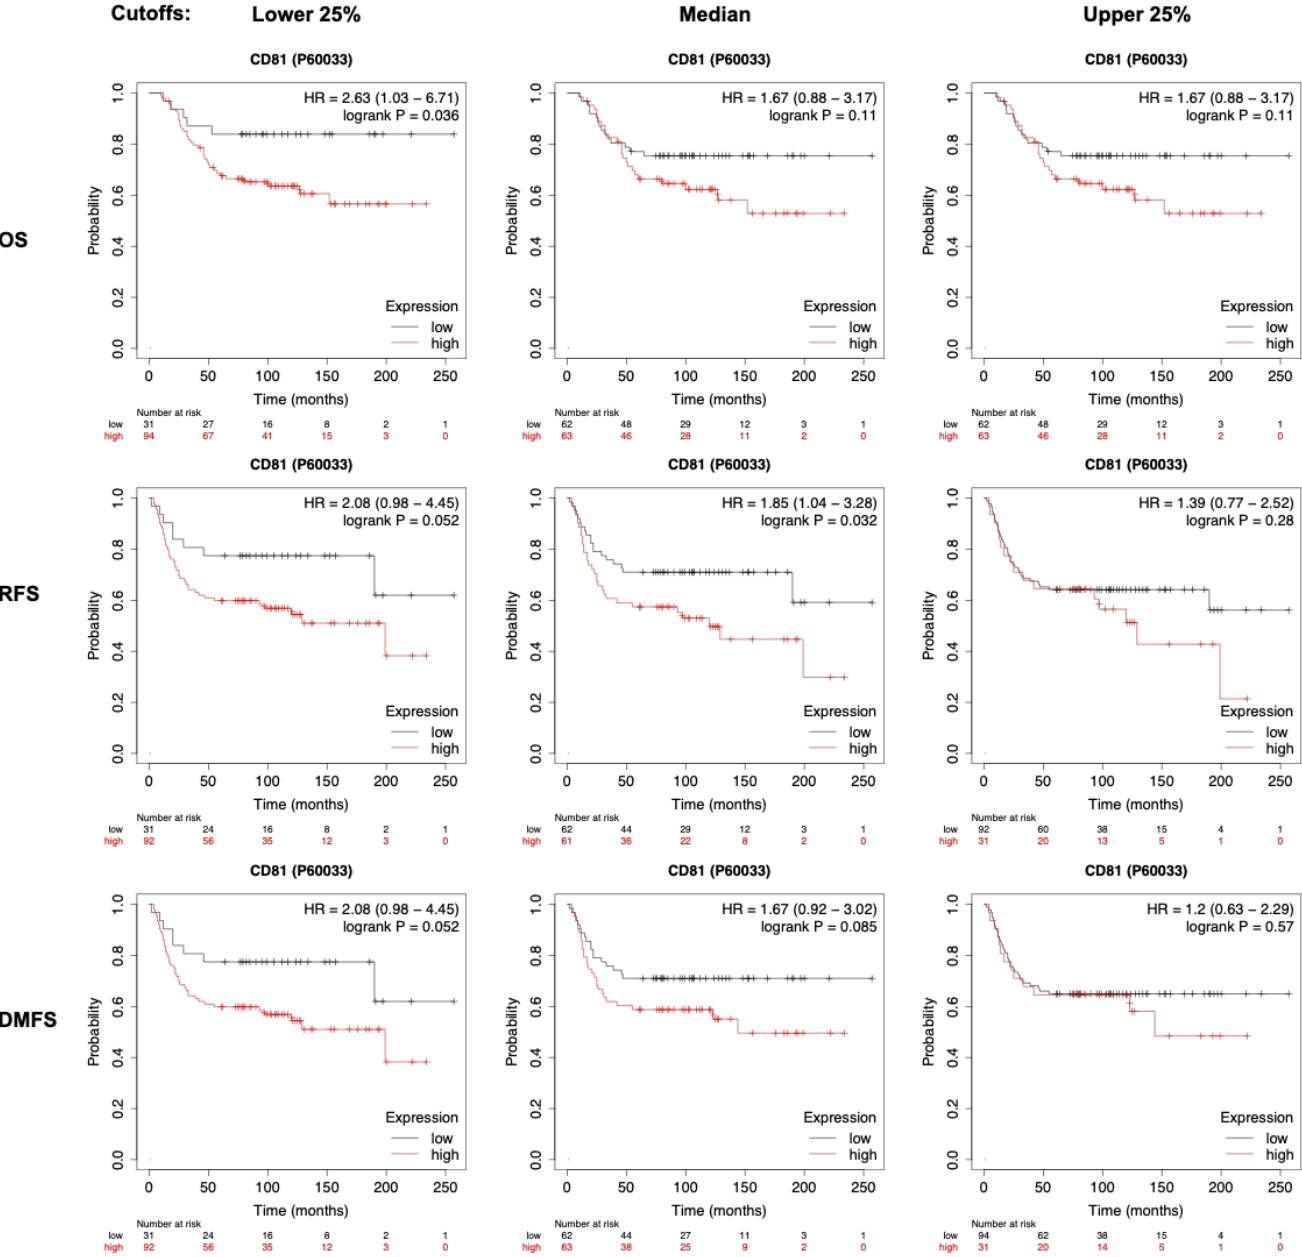

Supplement: supp [file elife_poa_e82669_Figure_4_figure_supplement_1.pdf › elife_poa_e82669_Figure_4_figure_supplement_1.pdf]

Figure 4- figure supplement 3

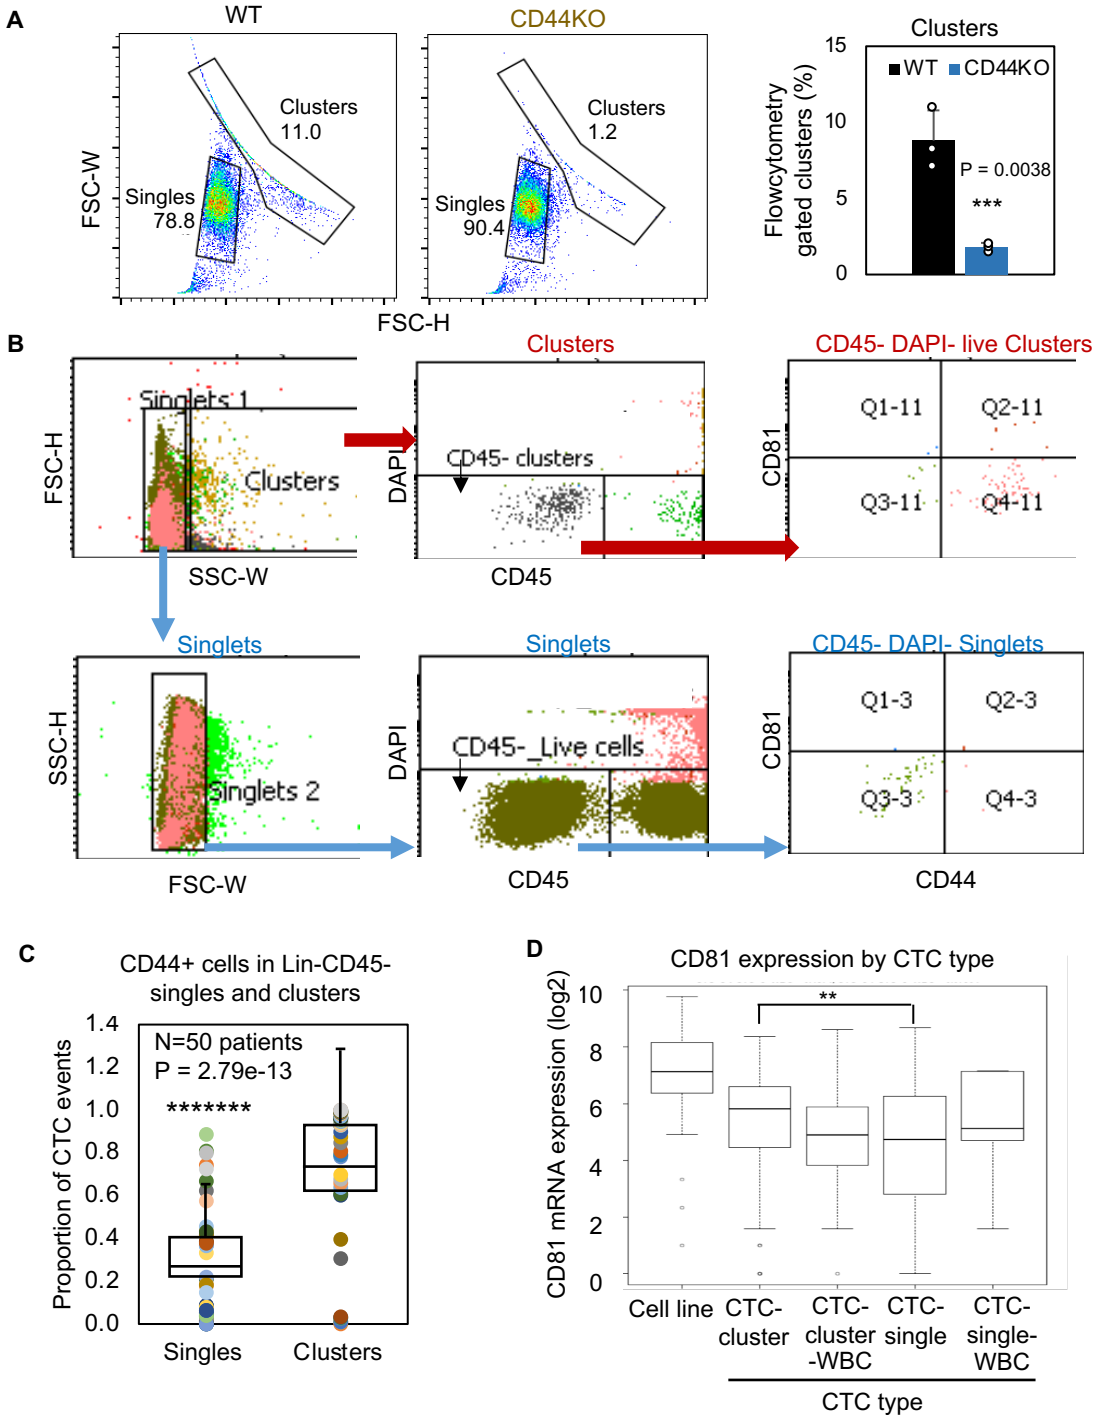

Supplement: supp [file elife_poa_e82669_Figure_4_figure_supplement_3.pdf › elife_poa_e82669_Figure_4_figure_supplement_3.pdf]

**Figure 4- figure supplement 4**

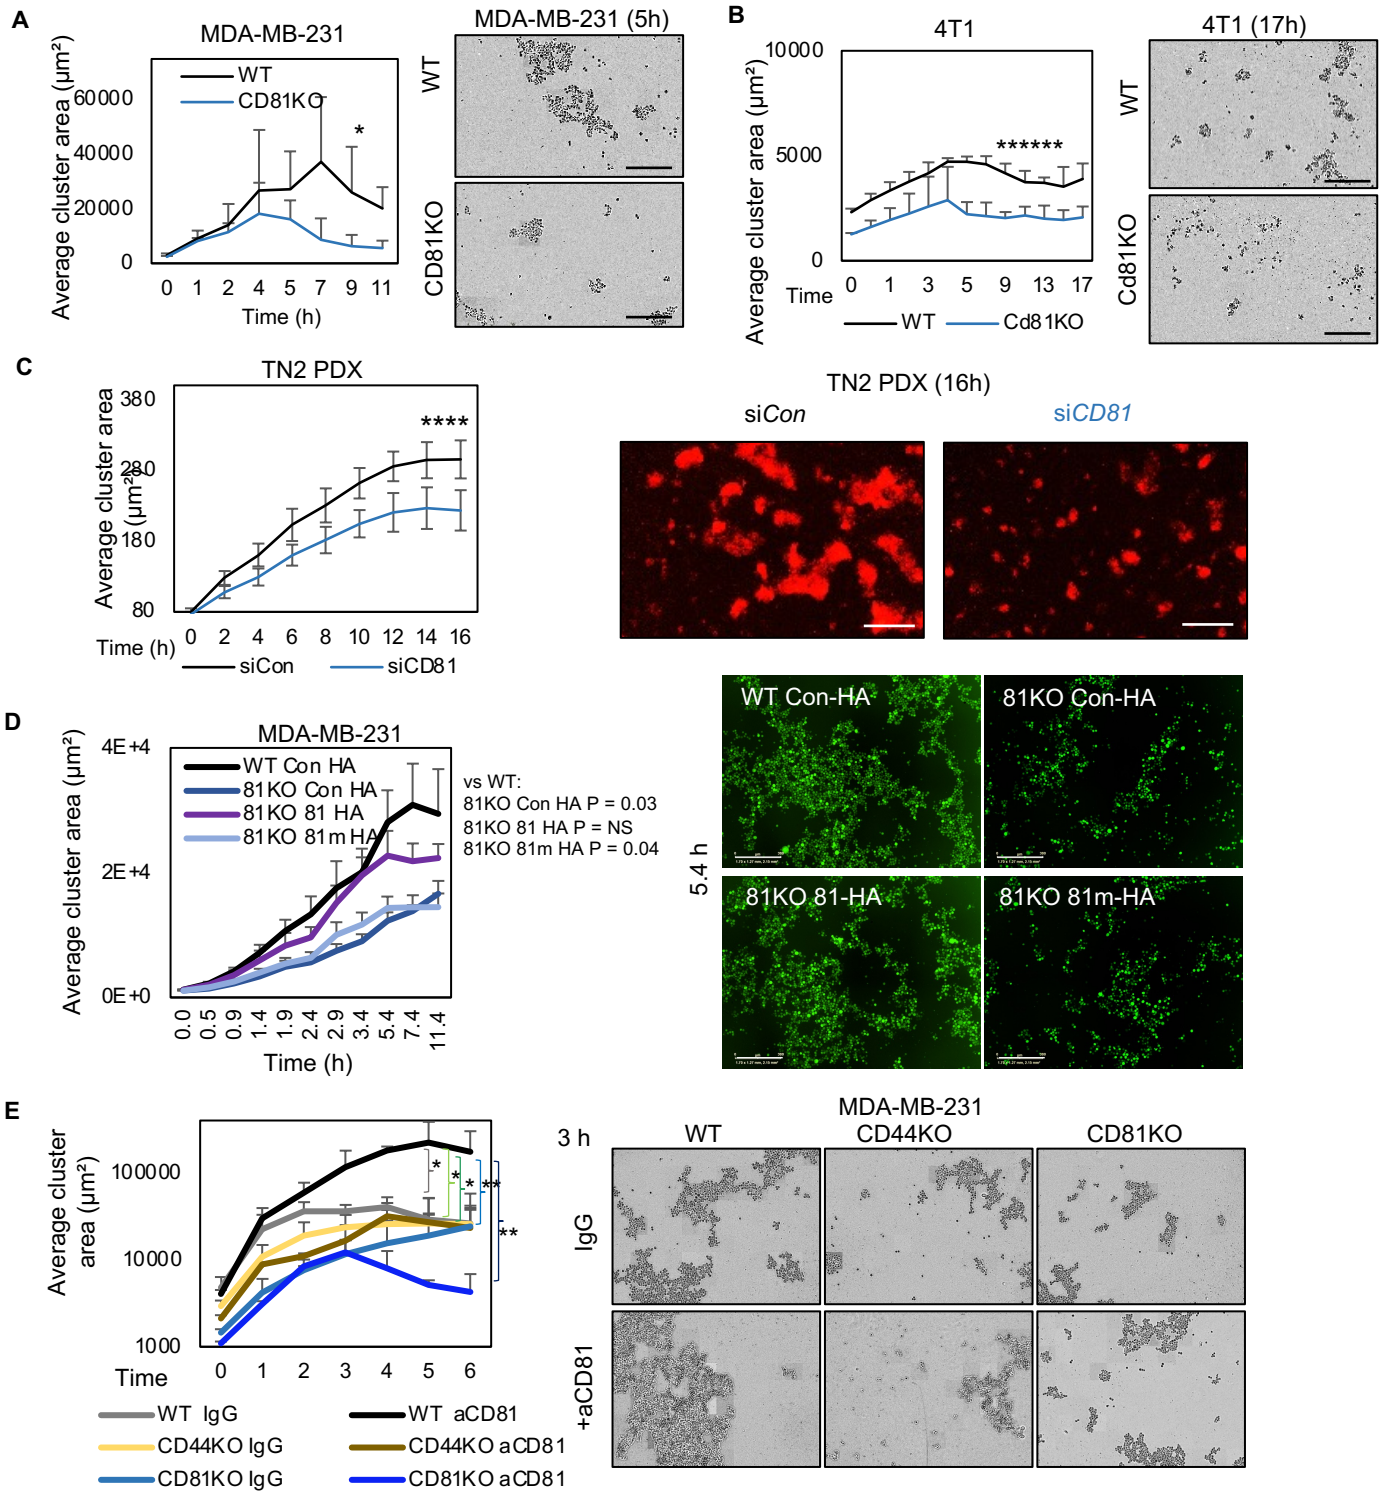

Supplement: supp [file elife_poa_e82669_Figure_4_figure_supplement_4.pdf › elife_poa_e82669_Figure_4_figure_supplement_4.pdf]

Figure 4- figure supplement 5

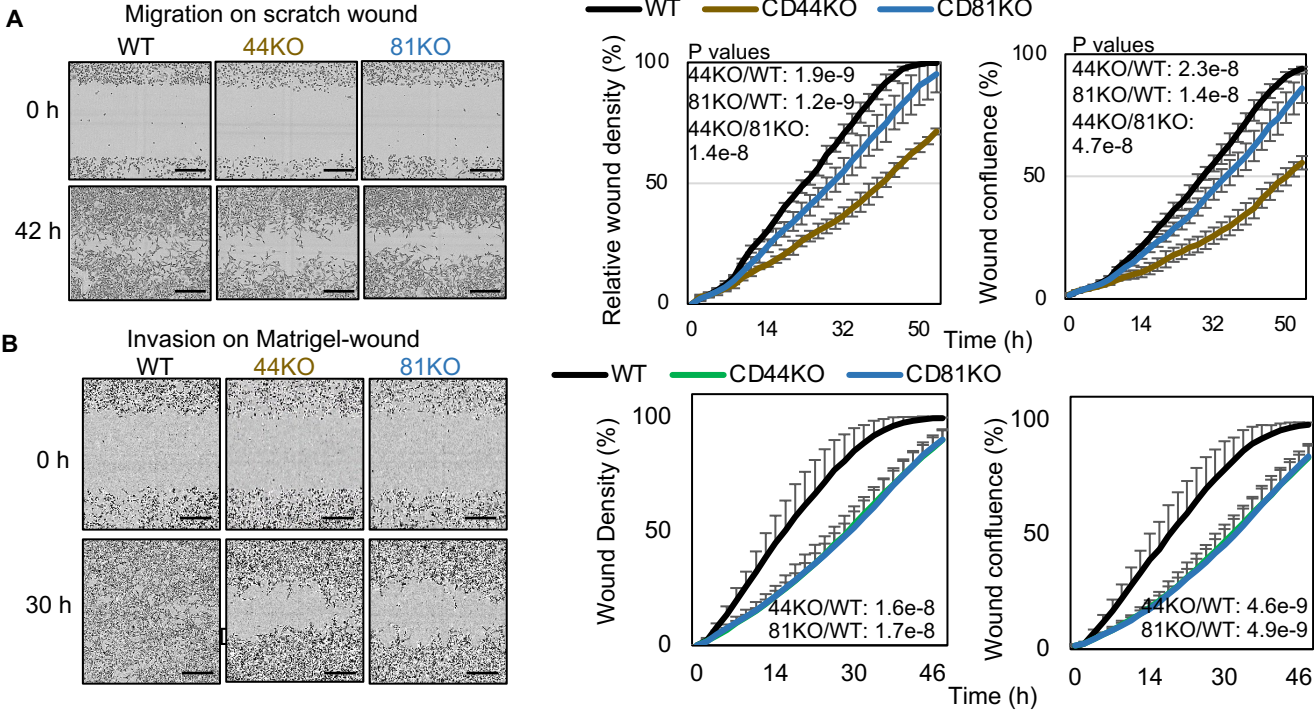

Supplement: supp [file elife_poa_e82669_Figure_4_figure_supplement_5.pdf › elife_poa_e82669_Figure_4_figure_supplement_5.pdf]

Figure 6- figure supplement 1

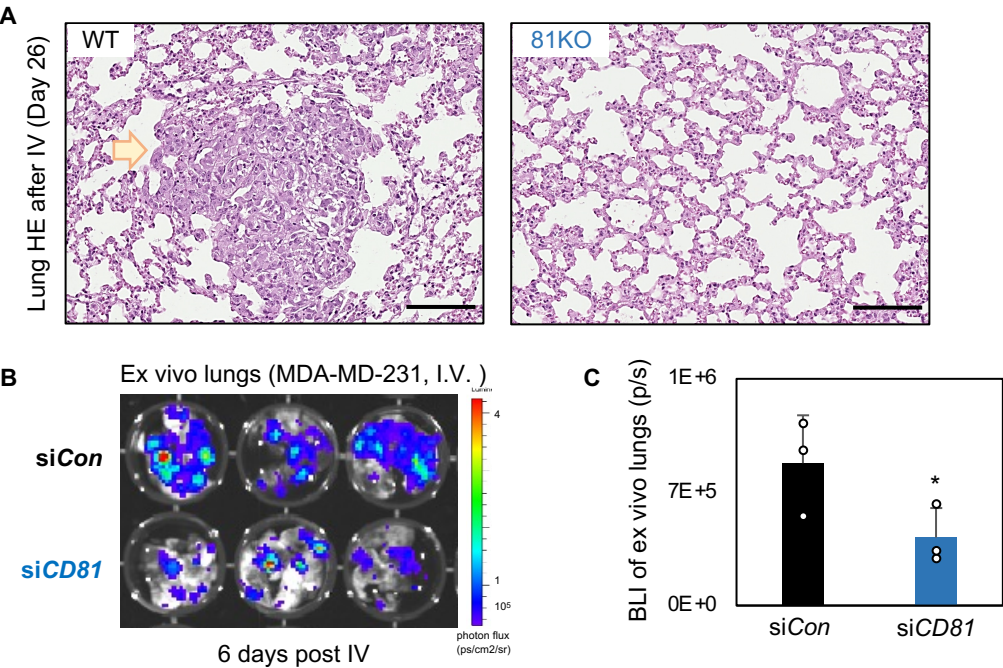

Supplement: supp [file elife_poa_e82669_Figure_6_figure_supplement_1.pdf › elife_poa_e82669_Figure_6_figure_supplement_1.pdf]

Figure 6- figure supplement 2

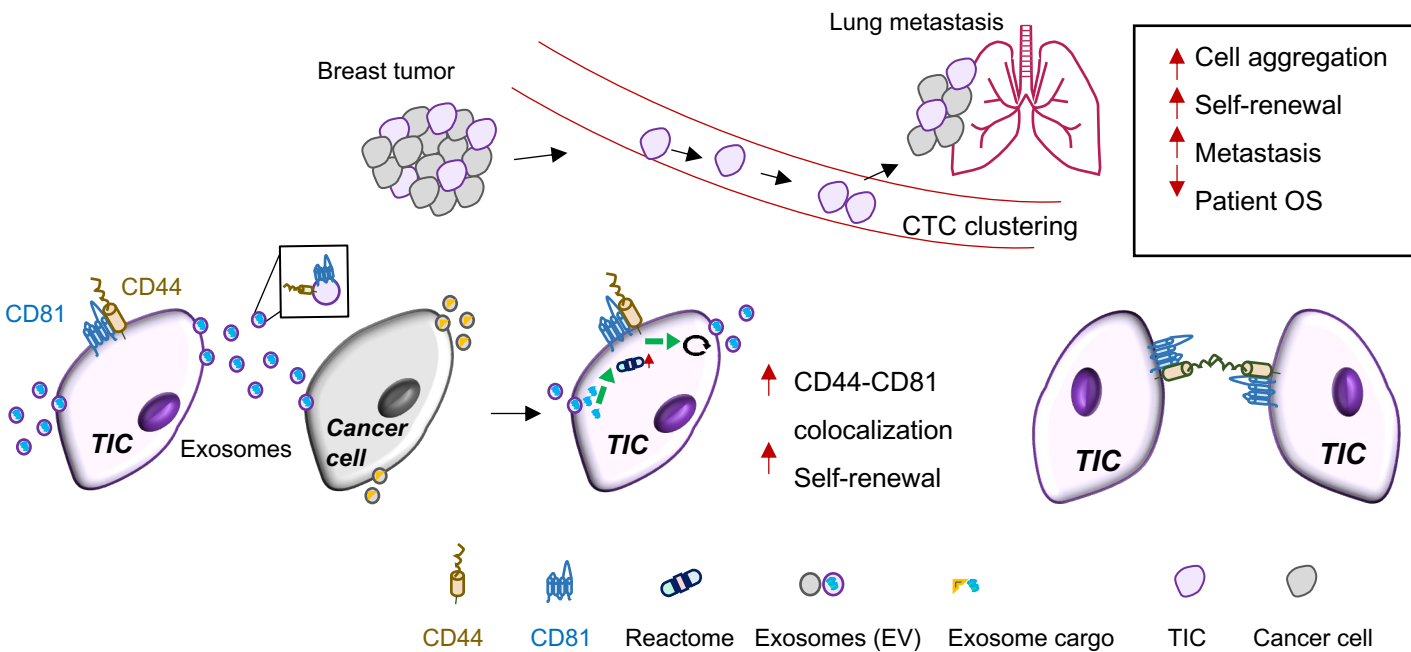

Supplement: supp [file elife_poa_e82669_Figure_6_figure_supplement_2.pdf › elife_poa_e82669_Figure_6_figure_supplement_2.pdf]
